# Supplementary material for: Comprehensive analyses of genomes, transcriptomes and metabolites of neem tree
Source: PeerJ journal article supplement (doi:10.7717/peerj.1066), 2015-08-06

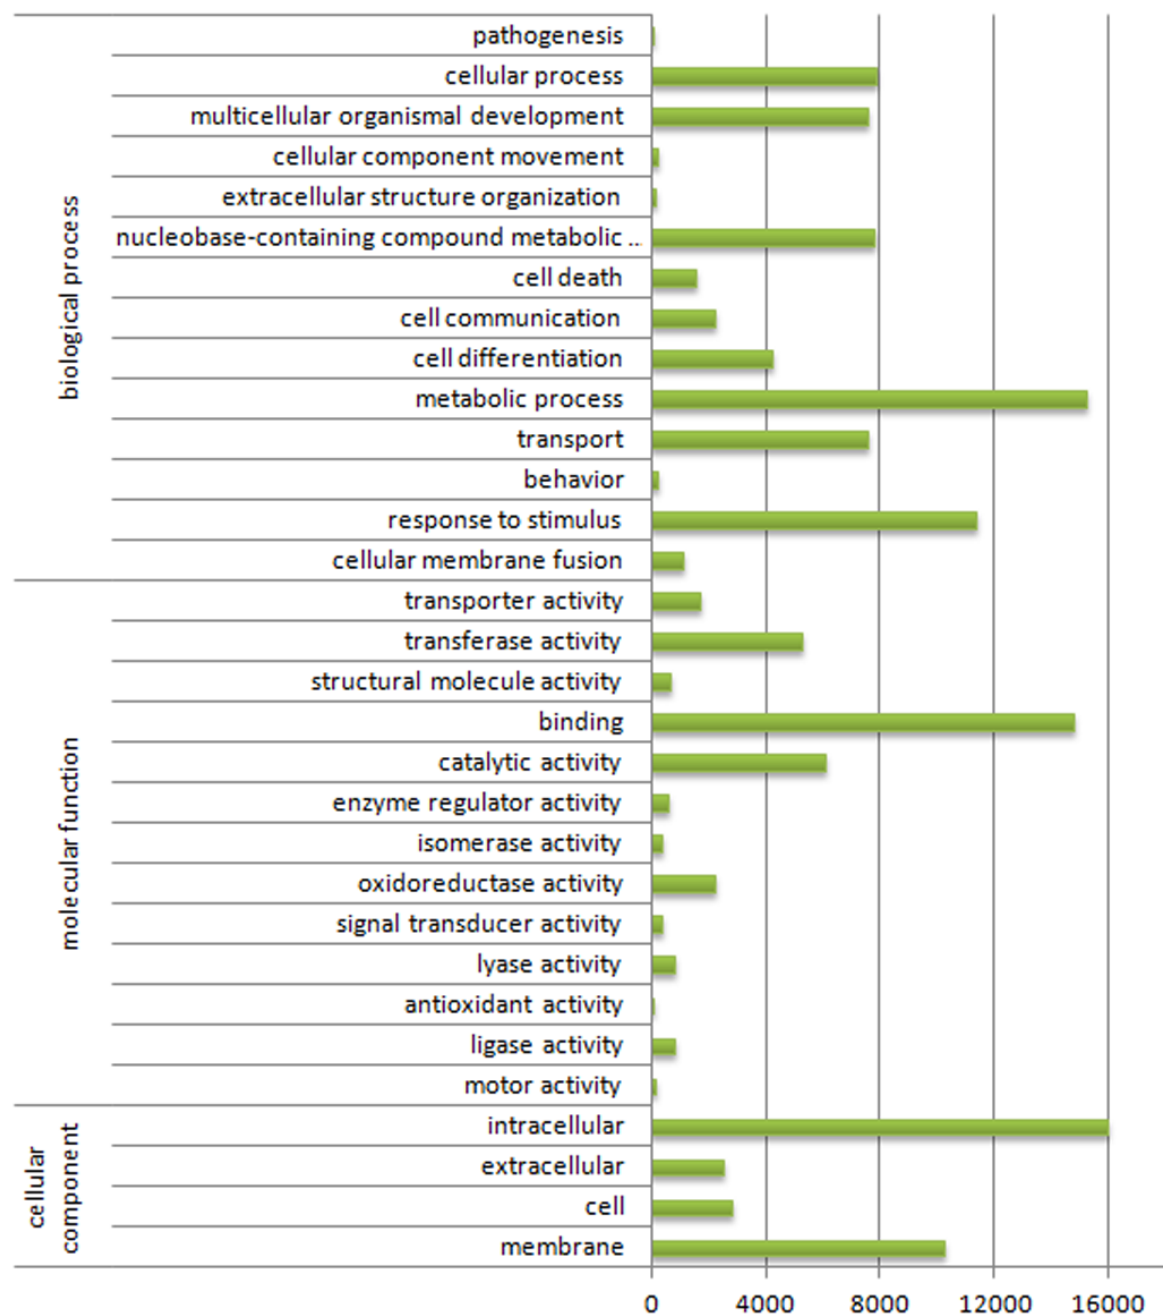

Supplement: Supplementary_Fig_2.pdf [file Supplementary_Fig_2.pdf]
