# Supplementary material for: Comprehensive analyses of genomes, transcriptomes and metabolites of neem tree
Source: PeerJ. 2015 Aug 6;3:e1066. doi: 10.7717/peerj.1066 (PMC4540028; doi:10.7717/peerj.1066)
Supplement: Table S2 [file peerj-03-1066-s002.xls]

## Sheet: Sheet1
Supplementary Table 2: Gene prediction statistics using Augustus and Genscan for Genoytpe 1 hybrid genome assembly (version 2)
	GeneScan	Augustus	Combined genes
Number of Predicted Genes	52617	40130	48032
Genes > 100bp	47113	39884	44495
Genes with RNA seq evidance	33330	35233	32278
Average CDS length (nts)	684	970	876
GC percent in CDS	42.41	43.1	42.81
Average number of exons per gene	3.4	4.52	4.28
Average exon length (nts)	197	288.76	269.82
Average number of introns per gene	1.24	1.76	1.65
Average intron length (nts)	671.61	359.5	416.49
