# Supplementary material for: Comprehensive analyses of genomes, transcriptomes and metabolites of neem tree
Source: PeerJ. 2015 Aug 6;3:e1066. doi: 10.7717/peerj.1066 (PMC4540028; doi:10.7717/peerj.1066)
Supplement: Table S5 [file peerj-03-1066-s005.xls]

## Sheet: Sheet1
Supplementary Table 5 : Assembly statistics of re-analysed Krishnan and co-workers data (SRP013453)
	Analysis performed by Krishnan et al., 2012	Re-Analysis performed using Krishnan et al., 2012 SRA data (SRP013453)
Total number of paired-end reads	123557655	123557655
Total number of mate-pair reads	89848788	89848788
Assembly software(s)	SOAP-denovo	SOAP-denovo 2	SOAP-denovo 2	SOAP-denovo 2	SOAP-denovo 2
K-mer	31	31	33	35	37
Total number of scaffolds	NA	192586	186268	178844	218739
longest scaffold (Kb)	3641215	1077981	1309084	1650635	130777
Assembled genome size (Mb)	364	326	321	314	317
Total number of contigs in assembly	9714	192586	186268	178844	218739
Max. contig length (bp)	3641215	1077981	1309084	1650635	130777
Scaffold N50	452028	102833	124231	147312	7844
No of Ns in the Assembly (%)	NA	64.53	63.94	63.06	14.17
Repeat content	0.13	0.2156	0.2369	0.3602	0.352
