# Supplementary material for: Comprehensive analyses of genomes, transcriptomes and metabolites of neem tree
Source: PeerJ. 2015 Aug 6;3:e1066. doi: 10.7717/peerj.1066 (PMC4540028; doi:10.7717/peerj.1066)
Supplement: Table S7 [file peerj-03-1066-s007.xls]

## Sheet: Sheet1
Supplimentary Table 7: Metabolite quantity measurement in different explants of neem tree (Genotype 1)
Parts	Azadirachtin (pg/ug )	Nimbin (pg/ug )	Salanin (pg/ug )
Flower and bud	10.2563	88.1665	18.8043
Mature fruit	12139.3	3474.31	5752
Mature leaf	8.14091	69.6213	150.364
Developing endosperm	9898.15	1779.34	5093.7
Fruit coat and pulp	61.6457	73.5194	58.9974
Seedling shoot	1094.68	263.146	242.614
Seedling root	685.774	900.337	270.337
