# Supplementary material for: Comprehensive analyses of genomes, transcriptomes and metabolites of neem tree
Source: PeerJ. 2015 Aug 6;3:e1066. doi: 10.7717/peerj.1066 (PMC4540028; doi:10.7717/peerj.1066)
Supplement: Table S8 [file peerj-03-1066-s008.xls]

## Sheet: Sheet1
Supplementary Table 8a: Curated gene list (highlighted in Yellow) with high expression in developing endosperm of neem and also with high correlation with azadirachtin content in the tissues under study. Putative canditate genes are shown in yellow, which are likely to be involved in biosynthesis of azadirachtin
	BLAST							GO							KEGG					EC					EXPRESSION
Gene Name	query_length	accession_number	length	description	E value	bit score	identical	GOSLIM	GOTERM	Functional category	Description	uniprot id best hit	Bitscore	E-value	KEGG ID	Description	uniprot id best hit	bitscore	E-value	EC ID	Description	uniprot id best hit	bitscore	E-value	Mature leaf	Flower and bud	Developing endosperm	Fruit coat and pulp	Mature fruit	Seedling root	Seedling shoot	Corelation value with azadirachtin concentration
Ai02g14817	1398	ABG73109	496	Pis v 2.0101 allergen11S globulin precusor [Pistacia vera]	1e-173	503	0.577	GO:0045735	NA	F	"nutrient reservoir activity"	P09800	427	1e-145	-	-	-	-	-	-	-	-	-	-	0.59197	0	1864.74	4.01685	2462.72	0.463805	0.304923	0.99627
Ai02g8501	256	-	-	-	-	-	-	-	-	-	-	-	-	-	-	-	-	-	-	-	-	-	-	-	0	0	282.951	4.29949	422.83	3.42283	0	0.99119
Ai02g8513	582	XP_002308342	172	predicted protein [Populus trichocarpa]	9e-59	189	0.651	-	-	-	-	-	-	-	-	-	-	-	-	-	-	-	-	-	0	0.377777	702.343	82.5355	800.953	0	0.79763	0.99037
Ai02g29577	738	EMJ12998	277	hypothetical protein PRUPE_ppa009787mg [Prunus persica]	1e-116	341	0.673	-	-	-	-	-	-	-	-	-	-	-	-	-	-	-	-	-	0	4.47359	1541.29	80.1536	2322.78	1.85381	0.609385	0.989388
Ai02g18684	1074	EOY15700	364	Uncharacterized protein TCM_034686 [Theobroma cacao]	1e-155	449	0.633	-	-	-	-	-	-	-	-	-	-	-	-	-	-	-	-	-	0	0.86108	236.314	13.4071	380.163	0	0	0.984754
Ai02g22122	837	XP_004310104	280	PREDICTED: uncharacterized protein LOC101292083 [Fragaria vesca subsp. vesca]	1e-138	398	0.721	-	-	-	-	-	-	-	-	-	-	-	-	-	-	-	-	-	12.3473	1.1296	218.05	22.7578	339.245	4.83699	1.06001	0.984143
Ai02g25200	966	EMJ10563	320	hypothetical protein PRUPE_ppa008757mg [Prunus persica]	-	632	0.949	GO:0005981	GO:0050789	P	"regulation of glycogen catabolic process"	P62142	531	0	K06269	"Oocyte meiosis"	Q5I085	531	0	3.1.3.16	"Phosphoproteinphosphatase."	P48488	612	0	98.9586	103.543	178.54	119.194	185.643	115.094	103.306	0.976599
Ai02g1916	2970	EOY22685	995	TUDOR-SN protein 1 isoform 1 [Theobroma cacao]	-	1501	0.766	GO:0005737	GO:0005622	C	"cytoplasm"	Q66X93	443	1e-139	-	-	-	-	-	-	-	-	-	-	45.5651	106.889	446.142	163.382	575.278	173.031	75.507	0.970535
Ai02g16587	1311	EOY08224	418	Basic-leucine zipper transcription factor family protein, putative isoform 1 [Theobroma cacao] gb|EOY08225.1| Basic-leucine zipper transcription factor family protein, putative isoform 1 [Theobroma cacao]	1e-157	457	0.592	GO:0010228	GO:0007275	P	"vegetative to reproductive phase transition of meristem"	Q9SJN0	349	1e-116	K14432	"Plant hormone signal transduction"	Q9SJN0	349	1e-117	-	-	-	-	-	0.316853	5.72022	131.813	7.0245	109.844	1.98602	2.93779	0.968162
Ai02g2171	951	XP_002518642	402	conserved hypothetical protein [Ricinus communis] gb|EEF43567.1| conserved hypothetical protein [Ricinus communis]	1e-168	480	0.772	-	-	-	-	-	-	-	-	-	-	-	-	-	-	-	-	-	228.603	175.607	465.1	193.909	665.567	286.013	209.697	0.964183
Ai02g9759	1056	NP_001241259	355	uncharacterized protein LOC100780731 [Glycine max] gb|ACU18023.1| unknown [Glycine max]	1e-148	429	0.722	GO:0008152	GO:0008152	P	"metabolic process"	A4IGM4	111	3e-27	K00071	"Steroid hormone biosynthesis"	A4IGM4	111	4e-28	1.1.1.146	"11-beta-hydroxysteroiddehydrogenase."	P16232	83.2	3e-17	0	0.0974347	103.171	9.10242	203.516	0	0	0.964164
Ai02g23407	618	EOX90564	205	Cystathionine beta-synthase (CBS) family protein isoform 1 [Theobroma cacao]	1e-126	362	0.883	GO:0006096	GO:0008152	P	"glycolysis"	Q9LEV3	340	1e-119	-	-	-	-	-	-	-	-	-	-	182.128	185.664	1092.59	354.369	1009.47	243.489	143.699	0.962301
Ai02g22479	435	AAG37441	168	seed maturation protein LEA 4 [Glycine tabacina]	2e-30	115	0.496	GO:0009790	GO:0007275	P	"embryo development"	Q01417	104	7e-28	-	-	-	-	-	-	-	-	-	-	0	6.12832	196.641	7.3544	404.709	0	0	0.960394
Ai02g13132	1083	XP_002517647	403	AMP-activated protein kinase, gamma regulatory subunit, putative [Ricinus communis] gb|EEF44811.1| AMP-activated protein kinase, gamma regulatory subunit, putative [Ricinus communis]	1e-163	469	0.661	GO:0048443	GO:0007275	P	"stamen development"	Q8GXI9	372	1e-127	-	-	-	-	-	-	-	-	-	-	0	0.284459	306.845	8.86016	649.121	0.609032	0	0.958263
Ai02g22663	759	EOY06701	230	Heme oxygenase-like, multi-helical [Theobroma cacao]	2e-83	256	0.697	GO:0005575	NA	C	"cellular_component"	Q9ASY9	202	3e-64	-	-	-	-	-	-	-	-	-	-	6.8797	36.821	348.317	108.087	631.895	26.951	25.3967	0.958032
Ai02g18882	708	EMJ28759	239	hypothetical protein PRUPE_ppa010705mg [Prunus persica]	1e-141	403	0.787	GO:0010228	GO:0007275	P	"vegetative to reproductive phase transition of meristem"	O81270	375	1e-132	-	-	-	-	-	-	-	-	-	-	2.47858	2.87224	4001.78	218.384	8525.91	13.5937	6.38357	0.956595
Ai02g24028	1278	XP_002272148	403	PREDICTED: uncharacterized protein LOC100263320 [Vitis vinifera]	1e-120	362	0.506	-	-	-	-	-	-	-	-	-	-	-	-	-	-	-	-	-	0	0	156.551	14.6711	122.111	0	1.00617	0.95552
Ai02g15446	1473	EEE87286	486	hypothetical protein POPTR_0009s05950g [Populus trichocarpa]	-	592	0.684	GO:0031640	NA	P	"killing of cells of other organism"	Q9SPL4	119	2e-27	-	-	-	-	-	-	-	-	-	-	0.84025	41.6129	1260.12	49.0363	957.947	0.877773	21.9291	0.954837
Ai02g18652	252	AAG23841	83	metallothionein-like protein [Sesamum indicum] gb|AAR88997.1| seed-specific metallothionein-like protein [Sesamum indicum]	1e-29	108	0.62	GO:0005737	GO:0005622	C	"cytoplasm"	Q42377	89.4	5e-24	-	-	-	-	-	-	-	-	-	-	0	0	393.109	25.2293	848.701	0	0	0.954654
Ai02g6365	2196	EOY24432	543	Beta vacuolar processing enzyme [Theobroma cacao]	-	745	0.76	GO:0008233	GO:0003824	F	"peptidase activity"	P49042	734	0	K05290	"Glycosylphosphatidylinositol(GPI)-anchor biosynthesis"	Q8T4E1	98.2	9e-22	3.4.22.34	"Legumain."	P49046	711	0	15.4996	11.9292	362.828	89.0018	715.568	80.0915	13.8767	0.952743
Ai02g16117	915	EOY31299	318	Molybdenum cofactor sulfurase family protein isoform 1 [Theobroma cacao]	-	525	0.818	GO:0003824	GO:0003824	F	"catalytic activity"	Q1LZH1	147	8e-41	-	-	-	-	-	-	-	-	-	-	96.116	100.625	578.998	155.933	803.242	76.7685	359.046	0.951348
Ai02g20584	1401	EOX94439	381	Rho termination factor, putative [Theobroma cacao]	1e-135	403	0.608	GO:0003677	GO:0005488	F	"DNA binding"	Q8L4E7	183	4e-52	-	-	-	-	-	-	-	-	-	-	41.9397	35.6316	128.349	33.4003	212.713	26.7867	76.8175	0.95119
Ai02g14285	1071	EOX99481	365	Zinc finger C-x8-C-x5-C-x3-H type family protein, putative [Theobroma cacao]	1e-114	342	0.501	GO:0003677	GO:0005488	F	"DNA binding"	Q9ZWA1	241	1e-75	-	-	-	-	-	-	-	-	-	-	7.86713	10.3406	140.101	18.5081	301.367	4.93107	1.2157	0.949069
Ai02g3207	493	NP_001236991	400	acyl-CoA oxidase [Glycine max] gb|ABU98950.1| acyl-CoA oxidase [Glycine max]	1e-97	295	0.876	GO:0006623	GO:0006810	P	"protein targeting to vacuole"	Q96329	274	7e-91	K09478	"Fatty acid metabolism"	Q5RF40	77.4	6e-17	1.3.3.6	"Acyl-CoAoxidase."	Q96329	274	3e-91	44.1751	79.1083	151.882	46.8348	159.019	42.7113	84.2401	0.945846
Ai02g2091	747	XP_002329788	252	predicted protein [Populus trichocarpa] gb|ERP55176.1| maturation protein pPM32 [Populus trichocarpa]	9e-34	130	0.402	-	-	-	-	-	-	-	-	-	-	-	-	-	-	-	-	-	0	0	187.191	13.6631	434.256	0	0	0.945434
Ai02g25596	489	EOY11597	192	GATA transcription factor 15, putative [Theobroma cacao]	3e-20	90.5	0.385	-	-	-	-	-	-	-	-	-	-	-	-	-	-	-	-	-	0	4.39899	122.579	30.7726	102.827	0	1.95536	0.943557
Ai02g21264	1494	XP_002528630	574	catalytic, putative [Ricinus communis] gb|EEF33733.1| catalytic, putative [Ricinus communis]	-	684	0.741	GO:0016740	GO:0016740	F	"transferase activity"	Q9FFN2	616	0	-	-	-	-	-	2.4.2.41	"Xylogalacturonanbeta-1	3-xylosyltransferase."	Q94AA9	394	0	0.538538	135.656	49.1643	268.214	0	0	0.943027
Ai02g21246	1170	XP_004288991	398	PREDICTED: adipocyte plasma membrane-associated protein-like [Fragaria vesca subsp. vesca]	1e-169	486	0.665	GO:0004064	GO:0003824	F	"arylesterase activity"	Q9D7N9	161	2e-44	K01757	"Indole alkaloid biosynthesis"	P94111	90.5	6e-20	4.3.3.2	"Strictosidinesynthase."	P94111	90.5	2e-19	119.928	311.014	1002.18	522.237	1283.12	405.858	182.888	0.94253
Ai02g407	2375	NP_001267822	911	heat shock protein 101 [Vitis vinifera] gb|AAX08108.1| heat shock protein 101 [Vitis vinifera]	-	1317	0.874	GO:0005737	GO:0005622	C	"cytoplasm"	P42730	1270	0	-	-	-	-	-	-	-	-	-	-	59.2571	106.15	218.623	88.7023	316.574	43.6677	32.8163	0.941482
Ai02g22904	951	EOX96678	323	Nuclear transcription factor Y subunit A-1, putative isoform 2 [Theobroma cacao] gb|EOX96679.1| Nuclear transcription factor Y subunit A-1, putative isoform 2 [Theobroma cacao]	2e-99	303	0.512	GO:0003677	GO:0005488	F	"DNA binding"	Q9LXV5	134	2e-36	K08064	"Antigen processing and presentation"	P18576	79.3	2e-16	-	-	-	-	-	50.5522	31.9781	206.535	53.1117	172.184	40.6588	15.6697	0.941473
Ai02g23582	1338	XP_002531681	789	transketolase, putative [Ricinus communis] gb|EEF30700.1| transketolase, putative [Ricinus communis]	-	572	0.692	GO:0008152	GO:0008152	P	"metabolic process"	O20250	343	1e-110	K00615	"Carbon fixation in photosynthetic organisms"	Q5R1W6	104	1e-23	2.2.1.1	"Transketolase."	O20250	343	1e-110	4.06737	0.832097	133.564	6.04709	91.3749	6.99405	0	0.934986
Ai02g3376	1478	EOX94015	727	ABI3, putative isoform 5 [Theobroma cacao]	1e-166	494	0.547	GO:0005737	GO:0005622	C	"cytoplasm"	Q01593	276	9e-84	-	-	-	-	-	-	-	-	-	-	0	0	158.892	7.43797	106.796	0	0	0.933178
Ai02g23721	669	EOX91312	326	Reticulan like protein B13, putative [Theobroma cacao]	2e-62	205	0.519	GO:0071458	GO:0016020	C	"integral to cytosolic side of endoplasmic reticulum membrane"	O64837	156	1e-46	-	-	-	-	-	-	-	-	-	-	0	1.93355	492.645	61.5797	1243.12	2.06988	0	0.932478
Ai02g33728	426	XP_002302043	389	predicted protein [Populus trichocarpa] gb|EEE81316.1| hypothetical protein POPTR_0002s03890g [Populus trichocarpa]	7e-14	75.5	0.467	-	-	-	-	-	-	-	-	-	-	-	-	-	-	-	-	-	64.7146	40.7919	158.512	39.3537	252.002	28.2897	110.856	0.93098
Ai02g1017	814	XP_002329233	258	predicted protein [Populus trichocarpa] gb|ERP49120.1| Hydroxyacylglutathione hydrolase cytoplasmic family protein [Populus trichocarpa]	1e-124	362	0.67	GO:0005737	GO:0005622	C	"cytoplasm"	O24496	335	1e-115	K01069	"Pyruvate metabolism"	Q5ZI23	239	3e-78	3.1.2.6	"Hydroxyacylglutathionehydrolase."	O24496	335	1e-116	81.1702	74.8095	133.687	70.7889	202.457	104.747	86.354	0.930801
Ai02g12737	1158	CAJ21172	380	alcohol dehydrogenase [Alnus glutinosa]	-	686	0.89	GO:0005737	GO:0005622	C	"cytoplasm"	P25141	665	0	K00121	"Tyrosine metabolism"	Q0DWH1	456	1e-160	1.1.1.1	"Alcoholdehydrogenase."	P25141	665	0	29.2976	109.684	1057.06	250.229	1688.55	664.262	99.8624	0.929915
Ai02g1233	708	XP_002518625	234	conserved hypothetical protein [Ricinus communis] gb|EEF43767.1| conserved hypothetical protein [Ricinus communis]	1e-138	395	0.76	-	-	-	-	-	-	-	-	-	-	-	-	-	-	-	-	-	0	3.62809	1967.4	109.642	5275.34	0.970976	0	0.9273
Ai02g6244	849	XP_002329078	282	predicted protein [Populus trichocarpa] gb|ABK94070.1| unknown [Populus trichocarpa] gb|ERP66801.1| phosphatase 2C family protein [Populus trichocarpa]	1e-155	441	0.787	GO:0008152	GO:0008152	P	"metabolic process"	Q9LDA7	418	1e-148	K14497	"Plant hormone signal transduction"	Q9ZW21	116	4e-30	3.1.3.16	"Phosphoproteinphosphatase."	Q9LDA7	418	1e-148	14.1812	49.0535	160.476	93.0268	188.822	49.999	31.306	0.924534
Ai02g21527	1959	EEE80444	657	hypothetical protein POPTR_0002s12570g [Populus trichocarpa]	-	1012	0.8	GO:0006486	GO:0008152	P	"protein glycosylation"	P42731	820	0	K13126	"RNA transport"	P42731	820	0	-	-	-	-	-	196.537	383.43	757.096	430.949	988.062	475.955	236.717	0.923047
Ai02g14589	1134	EOX97590	292	DNAJ heat shock N-terminal domain-containing protein isoform 1 [Theobroma cacao]	1e-124	366	0.662	GO:0003723	GO:0005488	F	"RNA binding"	Q9NVM6	117	4e-29	-	-	-	-	-	-	-	-	-	-	16.2761	48.3711	190.013	107.07	271.17	95.0619	32.773	0.922677
Ai02g18358	618	XP_002514649	155	RNA binding protein, putative [Ricinus communis] gb|EEF47755.1| RNA binding protein, putative [Ricinus communis]	2e-36	132	0.639	GO:0008150	NA	P	"biological_process"	Q94F39	99.4	2e-24	-	-	-	-	-	-	-	-	-	-	0	0.528957	147.367	45.5222	113.375	2.26501	0	0.914643
Ai02g3615	732	EOY29131	325	ChaC family protein-like [Theobroma cacao]	1e-129	377	0.797	GO:0008150	NA	P	"biological_process"	Q9CQG1	125	1e-34	-	-	-	-	-	-	-	-	-	-	21.4899	45.2914	277.815	151.139	621.58	61.7363	56.577	0.9133
Ai02g17060	2790	XP_002271317	965	PREDICTED: probable LRR receptor-like serine/threonine-protein kinase At3g47570-like, partial [Vitis vinifera]	-	574	0.473	GO:0004672	GO:0016740	F	"protein kinase activity"	C0LGP4	471	1e-149	K13417	"Plant-pathogen interaction"	Q9SKG5	170	4e-44	2.7.11.1	"Non-specificserine/threonineproteinkinase."	C0LGP4	471	1e-150	29.1121	35.2653	151.149	95.1952	244.522	87.1717	35.7816	0.911742
Ai02g26438	728	EOY05668	571	Heat-shock protein 70T-2 [Theobroma cacao]	1e-102	203	0.826	GO:0009408	GO:0050896	P	"response to heat"	Q9SKY8	183	5e-90	K03283	"Endocytosis"	Q9LHA8	80.9	2e-37	-	-	-	-	-	16.5181	36.4758	154.786	49.9487	409.651	15.4638	13.231	0.906763
Ai02g4556	375	EOX94015	727	ABI3, putative isoform 5 [Theobroma cacao]	9e-68	224	0.893	GO:0005737	GO:0005622	C	"cytoplasm"	Q01593	196	3e-59	-	-	-	-	-	-	-	-	-	-	0	0	316.933	26.0834	190.017	0	0	0.906758
Ai02g9223	894	XP_002328078	260	histone deacetylase [Populus trichocarpa] gb|ERP62467.1| HISTONE DEACETYLASE 2A family protein [Populus trichocarpa]	8e-41	150	0.727	GO:0005622	GO:0005622	C	"intracellular"	Q9FVE6	129	6e-35	-	-	-	-	-	-	-	-	-	-	49.2933	296.557	938.813	494.597	1517.37	624.685	247.007	0.90604
Ai02g13518	2115	AEV43365	652	poly A-binding protein 2 [Citrus sinensis]	-	961	0.738	GO:0006486	GO:0008152	P	"protein glycosylation"	P42731	702	0	K13126	"RNA transport"	P42731	702	0	-	-	-	-	-	9.97635	42.0309	114.212	40.3666	93.9536	47.8003	46.6445	0.903789
Ai02g23585	600	EOY13716	383	DNA-binding storekeeper protein-related transcriptional regulator, putative [Theobroma cacao]	2e-57	192	0.543	-	-	-	-	-	-	-	-	-	-	-	-	-	-	-	-	-	17.9425	61.2821	126.382	81.7085	167.082	77.3179	61.6143	0.902692
Ai02g19368	1587	XP_002325231	401	predicted protein [Populus trichocarpa]	1e-136	407	0.825	GO:0006646	GO:0008152	P	"phosphatidylethanolamine biosynthetic process"	Q55BZ4	175	1e-48	K00968	"Phosphonate and phosphinate metabolism"	P19836	108	2e-25	2.7.7.14	"Ethanolamine-phosphatecytidylyltransferase."	Q55BZ4	175	5e-49	29.5189	72.5838	118.241	64.3532	215.141	74.2526	43.7482	0.902116
Ai02g25309	1485	XP_002517676	495	6-phosphogluconate dehydrogenase, putative [Ricinus communis] gb|EEF44840.1| 6-phosphogluconate dehydrogenase, putative [Ricinus communis]	-	905	0.909	GO:0006098	GO:0006139	P	"pentose-phosphate shunt"	P21577	526	0	K00033	"Pentose phosphate pathway"	Q9DCD0	464	1e-160	1.1.1.44	"Phosphogluconatedehydrogenase(decarboxylating)."	P21577	526	0	127.74	189.287	280.528	123.243	263.119	127.933	113.288	0.901883
Ai02g25337	1221	XP_002316998	403	predicted protein [Populus trichocarpa]	1e-178	509	0.842	GO:0008143	GO:0005488	F	"poly(A) RNA binding"	Q93W34	458	1e-159	K13126	"RNA transport"	P42731	107	5e-25	-	-	-	-	-	73.8245	82.2143	252.196	160.146	541.049	130.678	91.8983	0.89972
Ai02g3266	1521	XP_002262991	484	PREDICTED: protein pleiotropic regulatory locus 1-like [Vitis vinifera] emb|CBI22998.3| unnamed protein product [Vitis vinifera]	-	813	0.789	GO:0080008	GO:0005622	C	"CUL4 RING ubiquitin ligase complex"	Q42384	733	0	K12862	"Spliceosome"	Q42384	733	0	2.7.11.1	"Non-specificserine/threonineproteinkinase."	P49695	131	1e-31	76.0035	78.0039	152.595	129.862	196.058	85.7766	99.1905	0.899339
Ai02g1678	427	XP_002532113	440	acyl-CoA dehydrogenase, putative [Ricinus communis] gb|EEF30275.1| acyl-CoA dehydrogenase, putative [Ricinus communis]	1e-81	254	0.897	GO:0006623	GO:0006810	P	"protein targeting to vacuole"	Q96329	244	1e-79	K00232	"Fatty acid metabolism"	Q96329	244	1e-80	1.3.3.6	"Acyl-CoAoxidase."	Q96329	244	5e-80	66.9308	118.398	365.4	108.357	278.486	104.981	186.092	0.8988
Ai02g8976	618	XP_002321097	343	predicted protein [Populus trichocarpa]	1e-117	344	0.828	GO:0005886	GO:0016020	C	"plasma membrane"	O22707	326	1e-112	-	-	-	-	-	1.1.1.65	"Pyridoxine4-dehydrogenase."	O14295	117	7e-31	37.5819	45.4903	167.303	56.8278	392.814	113.251	59.5643	0.898776
Ai02g13974	1233	EOY27717	387	Translation initiation factor eIF-2B subunit delta, putative isoform 1 [Theobroma cacao]	1e-138	408	0.609	-	-	-	-	-	-	-	-	-	-	-	-	-	-	-	-	-	68.9993	218.998	776.786	356.986	1262.87	550.675	90.5959	0.897989
Ai02g25537	2187	EOX93551	732	AMP-dependent synthetase and ligase family protein isoform 1 [Theobroma cacao]	-	1097	0.744	GO:0005737	GO:0005622	C	"cytoplasm"	O35547	568	0	K01897	"Fatty acid metabolism"	Q9SJD4	1014	0	6.2.1.3	"Long-chain-fatty-acid--CoAligase."	Q9SJD4	1014	0	86.9087	55.3344	131.21	84.2942	165.284	51.6863	40.4712	0.897908
Ai02g14372	348	EEE80912	111	hypothetical protein POPTR_0002s23270g, partial [Populus trichocarpa]	5e-71	214	0.955	GO:0015031	GO:0006810	P	"protein transport"	Q9SIP0	211	9e-70	K07904	"Endocytosis"	P62494	162	9e-52	-	-	-	-	-	53.3833	36.2547	167.532	67.5594	144.721	92.6942	37.159	0.89741
Ai02g4404	427	XP_002514184	259	hypothetical protein RCOM_1048570 [Ricinus communis] gb|EEF48138.1| hypothetical protein RCOM_1048570 [Ricinus communis]	2e-54	179	0.758	GO:0010150	GO:0007275	P	"leaf senescence"	O82199	149	2e-43	-	-	-	-	-	-	-	-	-	-	19.7053	13.4771	131.372	56.0729	353.27	53.8104	16.8636	0.895443
Ai02g12426	2379	EOY32242	710	Evolutionarily conserved C-terminal region 2 isoform 2 [Theobroma cacao]	-	892	0.644	GO:0006959	GO:0050896	P	"humoral immune response"	Q9Y5A9	206	4e-56	-	-	-	-	-	-	-	-	-	-	68.7895	123.234	686.14	226.6	1763.15	412.006	109.537	0.895085
Ai02g14343	1593	EOX98742	515	3-deoxy-d-arabino-heptulosonate 7-phosphate synthase isoform 1 [Theobroma cacao]	-	883	0.823	GO:0009534	GO:0005622	C	"chloroplast thylakoid"	Q00218	838	0	K01626	"Phenylalanine	tyrosine and tryptophan biosynthesis"	Q00218	838	2.5.1.54	"3-deoxy-7-phosphoheptulonatesynthase."	Q00218	838	0	128.183	151.2	386.392	150.534	992.734	168.933	136.039	0.892872
Ai02g5792	483	BAK61844	158	heat shock protein [Citrus unshiu]	3e-73	224	0.758	GO:0005737	GO:0005622	C	"cytoplasm"	P29830	184	2e-59	K13993	"Protein processing in endoplasmic reticulum"	Q6Z6L5	119	1e-34	-	-	-	-	-	4.81523	2.81937	133.006	41.6032	416.904	42.2542	10.9134	0.889546
Ai02g6084	1029	XP_002279359	345	PREDICTED: NADP-dependent alkenal double bond reductase P2 [Vitis vinifera] emb|CAN61471.1| hypothetical protein VITISV_043825 [Vitis vinifera]	-	565	0.798	GO:0005886	GO:0016020	C	"plasma membrane"	Q39173	504	1e-180	-	-	-	-	-	1.3.1.74	"2-alkenalreductase."	Q39173	504	1e-180	65.7137	58.4155	212.425	62.9286	146.409	35.3968	64.3131	0.88931
Ai02g11112	2088	CBI28117	436	unnamed protein product [Vitis vinifera]	-	564	0.69	GO:0016747	transferring acyl groups other than amino-acyl groups"	F	"transferase activity	GO:0016740	Q8LL69	170	K13065	"Phenylpropanoid biosynthesis"	Q9FI78	96.3	9e-21	2.3.1.167	"10-deacetylbaccatinIII10-O-acetyltransferase."	Q9M6E2	159	1e-41	20.8039	65.2886	105.345	61.8765	137.544	36.8647	19.0285	0.888011
Ai02g12807	1050	XP_002511145	349	Corticosteroid 11-beta-dehydrogenase, putative [Ricinus communis] gb|EEF51747.1| Corticosteroid 11-beta-dehydrogenase, putative [Ricinus communis]	1e-152	439	0.625	GO:0008152	GO:0008152	P	"metabolic process"	A4IGM4	124	6e-32	K00071	"Steroid hormone biosynthesis"	A4IGM4	124	6e-33	1.1.1.146	"11-beta-hydroxysteroiddehydrogenase."	P50172	107	8e-26	0	0.0980355	367.521	15.2781	1347.63	0.629687	0	0.887509
Ai02g19151	1227	XP_002531681	789	transketolase, putative [Ricinus communis] gb|EEF30700.1| transketolase, putative [Ricinus communis]	1e-177	521	0.822	GO:0008152	GO:0008152	P	"metabolic process"	Q43848	368	1e-120	-	-	-	-	-	2.2.1.1	"Transketolase."	Q43848	368	1e-120	7.0035	2.40545	161.019	8.20923	88.3674	5.80295	0	0.886908
Ai02g21958	501	EMJ07228	167	hypothetical protein PRUPE_ppa012491mg [Prunus persica]	1e-108	312	0.861	GO:0005737	GO:0005622	C	"cytoplasm"	P12994	85.1	3e-20	-	-	-	-	-	-	-	-	-	-	0	6.97416	127.875	7.54706	470.839	0	0	0.885028
Ai02g14681	234	EOY12800	94	Uncharacterized protein TCM_031319 [Theobroma cacao]	3e-27	102	0.649	-	-	-	-	-	-	-	-	-	-	-	-	-	-	-	-	-	156.897	105.11	252.046	192.725	337.456	206.83	151.372	0.884105
Ai02g7559	507	AEO31515	195	WRKY transcription factor B [Dimocarpus longan]	2e-64	203	0.637	GO:0048527	GO:0007275	P	"lateral root development"	Q9FYA2	178	6e-57	K13424	"Plant-pathogen interaction"	Q8S8P5	102	9e-26	-	-	-	-	-	80.9271	142.639	378.781	213.833	987.287	64.1183	84.3077	0.884079
Ai02g30241	618	NP_001268197	219	1-Cys peroxiredoxin [Vitis vinifera] emb|CBI25995.3| unnamed protein product [Vitis vinifera] gb|AEL16456.1| 1-Cys peroxiredoxin [Vitis vinifera]	4e-68	156	0.577	GO:0016209	GO:0016209	F	"antioxidant activity"	Q6E2Z6	141	7e-65	K11188	"Methane metabolism"	P0C5C9	145	1e-61	1.11.1.15	"Peroxiredoxin."	Q6E2Z6	141	3e-65	0	5.11325	193.436	46.2709	687.879	1.13251	1.48911	0.88362
Ai02g4350	1698	XP_004135105	587	PREDICTED: serine/threonine-protein phosphatase 2A 65 kDa regulatory subunit A beta isoform-like [Cucumis sativus] ref|XP_004159301.1| PREDICTED: serine/threonine-protein phosphatase 2A 65 kDa regulatory subunit A beta isoform-like [Cucumis sativus]	-	1072	0.939	GO:0048443	GO:0007275	P	"stamen development"	Q38845	974	0	K03456	"Wnt signaling pathway"	Q38950	1043	0	-	-	-	-	-	98.4124	114.513	297.929	209.875	324.111	164.794	82.7474	0.883324
Ai02g12382	1188	EOY13224	433	Class I glutamine amidotransferase-like superfamily protein isoform 1 [Theobroma cacao]	-	665	0.872	GO:0008233	GO:0003824	F	"peptidase activity"	Q8UW59	132	2e-35	K05687	"Parkinsons disease"	Q8UW59	132	2e-36	-	-	-	-	-	57.7168	71.52	151.654	116.814	311.87	84.3753	74.3247	0.883166
Ai02g16889	465	ADB85094	158	heat-shock protein [Jatropha curcas]	6e-86	256	0.805	GO:0005737	GO:0005622	C	"cytoplasm"	P05478	246	7e-84	K13993	"Protein processing in endoplasmic reticulum"	Q9ZW31	230	1e-78	-	-	-	-	-	100.772	176.272	308.968	103.77	507.179	247.917	67.4799	0.882137
Ai02g3528	615	XP_002321097	343	predicted protein [Populus trichocarpa]	1e-123	358	0.847	GO:0005886	GO:0016020	C	"plasma membrane"	Q7XT99	329	1e-113	-	-	-	-	-	1.1.1.65	"Pyridoxine4-dehydrogenase."	O14295	126	3e-34	1059.11	905.576	1250.07	794.039	1370.62	768.449	751.453	0.880228
Ai02g24020	531	XP_002521125	626	transferase, transferring glycosyl groups, putative [Ricinus communis] gb|EEF41276.1| transferase, transferring glycosyl groups, putative [Ricinus communis]	1e-79	256	0.701	GO:0051509	GO:0016740	F	"tomatidine UDP-glucosyltransferase activity"	Q54IL5	84.3	4e-18	-	-	-	-	-	2.4.1.173	"Sterol3-beta-glucosyltransferase."	Q54IL5	84.3	2e-18	1.72245	9.87503	110.757	32.8329	73.6125	24.2915	2.6617	0.880018
Ai02g6997	7086	EOY29824	1541	Tetratricopeptide repeat-like superfamily protein isoform 2 [Theobroma cacao]	-	1945	0.663	GO:0016021	GO:0016020	C	"integral to membrane"	Q43804	124	4e-31	-	-	-	-	-	-	-	-	-	-	7.36361	7.40354	167.699	16.3144	90.6513	12.0632	7.5285	0.878088
Ai02g14711	327	XP_002276934	177	PREDICTED: uncharacterized protein LOC100263757 [Vitis vinifera] emb|CBI22901.3| unnamed protein product [Vitis vinifera]	4e-44	149	0.721	GO:0009707	GO:0016020	C	"chloroplast outer membrane"	Q0WMZ5	130	1e-38	-	-	-	-	-	-	-	-	-	-	17.2038	23.6564	119.515	12.7998	428.563	0	11.2785	0.877991
Ai02g41694	189	-	-	-	-	-	-	-	-	-	-	-	-	-	-	-	-	-	-	-	-	-	-	-	0	3.16826	116.221	16.9446	446.777	0	3.59646	0.877868
Ai02g17262	1746	XP_002512613	501	conserved hypothetical protein [Ricinus communis] gb|EEF50065.1| conserved hypothetical protein [Ricinus communis]	5e-53	196	0.314	-	-	-	-	-	-	-	-	-	-	-	-	-	-	-	-	-	0.23427	0.114306	273.598	7.86331	1092.6	0	0.241344	0.877521
Ai02g4846	1143	XP_002266821	375	PREDICTED: cysteine proteinase 15A-like [Vitis vinifera]	-	541	0.708	GO:0008233	GO:0003824	F	"peptidase activity"	P25804	381	1e-130	K01366	"Lysosome"	P00786	203	3e-62	3.4.22.15	"CathepsinL."	Q26534	267	1e-86	0.733577	0.178965	588.675	57.4908	2314.34	5.74752	0	0.877331
Ai02g14592	1422	XP_002306199	462	neutral amino acid transport protein [Populus trichocarpa] gb|EEE86710.1| hypothetical protein POPTR_0004s18450g [Populus trichocarpa] gb|ERP62383.1| hypothetical protein POPTR_0004s18450g [Populus trichocarpa]	-	718	0.767	GO:0015846	GO:0006810	P	"polyamine transport"	Q9C6S5	641	0	-	-	-	-	-	-	-	-	-	-	14.5352	6.38288	251.893	15.6903	133.3	2.27764	10.1824	0.877059
Ai02g21797	756	EMJ20045	252	hypothetical protein PRUPE_ppa010353mg [Prunus persica]	8e-96	288	0.61	-	-	-	-	-	-	-	-	-	-	-	-	-	-	-	-	-	180.238	86.8191	255.009	44.3237	408.812	0	14.2375	0.875506
Ai02g4392	537	EOY17861	320	Ribosomal protein L10 family protein isoform 1 [Theobroma cacao]	1e-106	314	0.905	GO:0003735	GO:0005198	F	"structural constituent of ribosome"	O04204	296	1e-101	K02941	"Ribosome"	O04204	296	1e-102	4.2.99.18	"DNA-(apurinicorapyrimidinicsite)lyase."	P19889	185	1e-57	133.449	459.317	697.7	390.792	830.374	479.493	345.885	0.874883
Ai02g13361	2283	EOY34443	723	P-loop containing nucleoside triphosphate hydrolases superfamily protein isoform 1 [Theobroma cacao]	-	986	0.691	GO:0005524	GO:0005488	F	"ATP binding"	Q8TGY9	114	3e-26	-	-	-	-	-	-	-	-	-	-	19.8511	87.4756	174.094	125.942	304.463	42.2159	17.1639	0.87354
Ai02g5082	771	XP_002525663	255	tonoplast intrinsic protein, putative [Ricinus communis] gb|EEF36781.1| tonoplast intrinsic protein, putative [Ricinus communis]	1e-132	380	0.728	GO:0006914	GO:0008152	P	"autophagy"	P26587	349	1e-121	-	-	-	-	-	-	-	-	-	-	0	2.47406	2373.8	39.5719	1177.83	0	0	0.872174
Ai02g874	414	XP_002320446	138	predicted protein [Populus trichocarpa] gb|EEE98761.1| cystatin family protein [Populus trichocarpa]	2e-25	101	0.479	GO:0010466	GO:0050789	P	"negative regulation of peptidase activity"	Q8L5T9	83.6	3e-20	-	-	-	-	-	-	-	-	-	-	0	0	325.235	7.21171	1368.25	0	0	0.871621
Ai02g24821	2397	XP_002516474	785	conserved hypothetical protein [Ricinus communis] gb|EEF45815.1| conserved hypothetical protein [Ricinus communis]	2e-73	263	0.632	GO:0016607	GO:0005622	C	"nuclear speck"	Q8BTI8	99.8	6e-20	-	-	-	-	-	-	-	-	-	-	62.0201	77.5032	102.873	83.4907	177.226	53.3459	59.2051	0.870805
Ai02g22179	1467	XP_002276399	1318	PREDICTED: ethylene-insensitive protein 2-like [Vitis vinifera]	-	636	0.637	GO:0010150	GO:0007275	P	"leaf senescence"	Q9S814	497	1e-163	K14513	"Plant hormone signal transduction"	Q9S814	497	1e-164	-	-	-	-	-	127.988	99.5061	144.806	100.39	236.119	108.873	89.8338	0.867677
Ai02g5322	1011	EOY05690	325	Cysteine synthase [Theobroma cacao]	-	545	0.848	GO:0005737	GO:0005622	C	"cytoplasm"	Q43317	518	0	K01697	"Glycine	serine and threonine metabolism"	P32232	176	2.5.1.51	"Beta-pyrazolylalaninesynthase."	Q43317	518	0	15.9078	90.6906	169.86	105.731	375.497	121.356	60.3774	0.866969
Ai02g12435	426	XP_002532165	141	conserved hypothetical protein [Ricinus communis] gb|EEF30218.1| conserved hypothetical protein [Ricinus communis]	7e-20	87.4	0.581	-	-	-	-	-	-	-	-	-	-	-	-	-	-	-	-	-	11.2033	19.4057	114.429	82.4043	325.864	1.75555	1.15416	0.866114
Ai02g20090	558	ABB02389	185	temperature-induced lipocalin' [Populus balsamifera] gb|ACJ02357.1| temperature-induced lipocalin [Populus tremula x Populus alba]	1e-116	335	0.869	GO:0005886	GO:0016020	C	"plasma membrane"	Q46036	101	3e-26	-	-	-	-	-	-	-	-	-	-	171.518	232.621	1464.02	455.248	5767.49	273.862	265.465	0.860336
Ai02g24888	552	XP_002265220	178	PREDICTED: uncharacterized protein OsI_027940-like [Vitis vinifera]	6e-66	207	0.734	GO:0008150	NA	P	"biological_process"	Q6ID70	100	3e-26	-	-	-	-	-	-	-	-	-	-	92.1928	195.998	293.648	251.391	457.534	125.117	150.945	0.860073
Ai02g16870	1584	XP_002511176	660	acetolactate synthase, putative [Ricinus communis] gb|EEF51778.1| acetolactate synthase, putative [Ricinus communis]	-	987	0.928	GO:0009082	GO:0008152	P	"branched chain family amino acid biosynthetic process"	P09342	940	0	K12261	"Peroxisome"	Q9LF46	176	4e-48	2.2.1.6	"Acetolactatesynthase."	P09342	940	0	496.266	397.042	635.702	248.391	793.882	212.797	229.04	0.859561
Ai02g5742	1143	EOY24855	369	D111/G-patch domain-containing protein isoform 3 [Theobroma cacao]	1e-162	466	0.65	-	-	-	-	-	-	-	-	-	-	-	-	-	-	-	-	-	16.8723	59.4165	117.721	87.9271	201.107	89.6613	46.8552	0.858944
Ai02g16516	564	XP_002512368	190	conserved hypothetical protein [Ricinus communis] gb|EEF49820.1| conserved hypothetical protein [Ricinus communis]	1e-54	179	0.524	GO:0008150	NA	P	"biological_process"	Q84MC0	141	2e-41	-	-	-	-	-	-	-	-	-	-	0	0	464.485	10.2304	215.359	0	0	0.856855
Ai02g14759	1875	EOY29289	393	EamA-like transporter family isoform 1 [Theobroma cacao]	-	572	0.753	GO:0000329	GO:0016020	C	"fungal-type vacuole membrane"	Q03730	144	1e-36	-	-	-	-	-	-	-	-	-	-	25.443	37.7735	113.285	41.5646	73.3654	29.3053	24.8672	0.855567
Ai02g7002	714	EOY07870	300	Translin family protein isoform 1 [Theobroma cacao]	1e-129	374	0.739	GO:0003677	GO:0005488	F	"DNA binding"	P79769	148	5e-43	-	-	-	-	-	-	-	-	-	-	27.0076	60.4976	150.555	96.4635	129.928	58.6716	57.5433	0.854343
Ai02g6004	1062	AGO32049	333	diacylglycerol acyltransferase 2 [Xanthoceras sorbifolium]	1e-179	507	0.75	GO:0019432	GO:0008152	P	"triglyceride biosynthetic process"	Q9ASU1	428	1e-150	K14456	"Glycerolipid metabolism"	Q86VF5	110	3e-27	2.3.1.20	"DiacylglycerolO-acyltransferase."	Q9ASU1	428	1e-150	51.6036	94.3233	101.729	38.6141	185.811	66.5557	58.478	0.853617
Ai02g1568	459	AFF57842	152	Cu/Zn superoxide dismutase [Tetradium ruticarpum]	2e-89	264	0.842	GO:0006801	GO:0008152	P	"superoxide metabolic process"	P23345	260	1e-89	K04565	"Prion diseases"	Q0DRV6	252	2e-87	1.15.1.1	"Superoxidedismutase."	P23345	260	5e-90	435.009	1031.55	1979.84	1511.01	2129.28	1034.51	889.963	0.853374
Ai02g8975	429	XP_002537023	150	aldo/keto reductase, putative [Ricinus communis] gb|EEF25360.1| aldo/keto reductase, putative [Ricinus communis]	3e-84	251	0.851	GO:0009734	GO:0050789	P	"auxin mediated signaling pathway"	P40691	237	2e-78	-	-	-	-	-	-	-	-	-	-	32.2128	45.7974	116.352	45.3388	405.743	60.9205	37.7628	0.851769
Ai02g18880	1338	EOY06149	463	RNA-binding family protein isoform 2 [Theobroma cacao] gb|EOY06150.1| RNA-binding family protein isoform 2 [Theobroma cacao]	1e-108	336	0.72	GO:0005737	GO:0005622	C	"cytoplasm"	Q96DH6	175	6e-50	K14411	"mRNA surveillance pathway"	Q96DH6	175	7e-51	-	-	-	-	-	67.9552	99.2597	223.64	152.959	441.024	207.958	89.2069	0.851381
Ai02g15198	495	EEF06313	156	hypothetical protein POPTR_0015s09360g, partial [Populus trichocarpa]	2e-30	115	0.463	GO:0010228	GO:0007275	P	"vegetative to reproductive phase transition of meristem"	Q39165	102	1e-26	-	-	-	-	-	-	-	-	-	-	14.031	13.4639	5130.89	120.354	2321.44	26.3836	26.0184	0.850815
Ai02g28723	458	XP_004287502	400	PREDICTED: zinc finger CCCH domain-containing protein 49-like [Fragaria vesca subsp. vesca]	4e-57	190	0.586	GO:0010150	GO:0007275	P	"leaf senescence"	O82199	153	8e-45	-	-	-	-	-	-	-	-	-	-	35.2623	14.1581	103.106	51.7207	400.427	22.9323	18.3397	0.846954
Ai02g13057	447	XP_002532653	148	ubiquitin-conjugating enzyme E2, putative [Ricinus communis] gb|EEF29726.1| ubiquitin-conjugating enzyme E2, putative [Ricinus communis]	1e-108	311	0.993	GO:0042023	GO:0006139	P	"DNA endoreduplication"	Q94F47	305	1e-107	K06689	"Protein processing in endoplasmic reticulum"	Q94F47	305	1e-108	6.3.2.19	"Ubiquitin--proteinligase."	Q94F47	305	1e-108	265.243	267.088	1023.4	585.363	3403.91	662.363	174.185	0.846577
Ai02g21989	246	-	-	-	-	-	-	-	-	-	-	-	-	-	-	-	-	-	-	-	-	-	-	-	2.31359	4.51544	238.461	18.2156	109.345	3.62536	0	0.845609
Ai02g11766	1277	XP_002311619	572	predicted protein [Populus trichocarpa] gb|EEE88986.1| heat shock protein 70 [Populus trichocarpa]	-	725	0.856	GO:0009408	GO:0050896	P	"response to heat"	Q9SKY8	634	0	K03283	"Endocytosis"	Q9LHA8	213	2e-62	-	-	-	-	-	15.802	34.1859	100.888	33.8978	430.766	5.90691	12.6267	0.845341
Ai02g2189	587	EMJ15050	401	hypothetical protein PRUPE_ppa006643mg [Prunus persica]	1e-42	154	0.446	GO:0016554	GO:0006139	P	"cytidine to uridine editing"	Q9LKA5	130	3e-35	-	-	-	-	-	-	-	-	-	-	28.4115	89.6152	119.675	90.096	264.366	66.4855	87.8274	0.844465
Ai02g22211	984	CAA79329	474	BP8 [Betula pendula]	3e-53	189	0.467	GO:0005737	GO:0005622	C	"cytoplasm"	P20075	139	5e-36	-	-	-	-	-	-	-	-	-	-	0.431087	0.631016	532.462	13.487	2887.92	0	0	0.844253
Ai02g42727	105	-	-	-	-	-	-	-	-	-	-	-	-	-	-	-	-	-	-	-	-	-	-	-	27.9283	68.1347	145.75	114.284	256.267	109.408	28.7717	0.842942
Ai02g15534	275	CBI27727	107	unnamed protein product [Vitis vinifera]	5e-20	84.7	0.5	-	-	-	-	-	-	-	-	-	-	-	-	-	-	-	-	-	61.2166	120.922	319.473	155.272	343.534	244.455	221.745	0.842938
Ai02g7691	1095	EOY28899	504	Mo25 family protein [Theobroma cacao]	-	612	0.874	GO:0080129	GO:0009987	P	"proteasome core complex assembly"	Q9M0M4	529	0	K08272	"mTOR signaling pathway"	Q9M0M4	529	0	-	-	-	-	-	157.858	151.048	200.872	145.63	385.646	121.574	86.6542	0.842453
Ai02g18614	630	EOY09570	164	60S ribosomal protein L21 isoform 1 [Theobroma cacao] gb|EOY09571.1| 60S ribosomal protein L21 isoform 1 [Theobroma cacao]	1e-105	308	0.756	GO:0003735	GO:0005198	F	"structural constituent of ribosome"	Q43291	295	1e-102	K02889	"Ribosome"	Q43291	295	1e-103	-	-	-	-	-	61.513	412.086	677.752	401.981	852.477	510.756	337.976	0.840984
Ai02g200	1032	-	-	-	-	-	-	-	-	-	-	-	-	-	-	-	-	-	-	-	-	-	-	-	48.3116	59.6303	172.458	110.871	516.483	141.784	56.9408	0.840609
Ai02g18165	789	XP_002518862	261	conserved hypothetical protein [Ricinus communis] gb|EEF43395.1| conserved hypothetical protein [Ricinus communis]	1e-104	311	0.637	GO:0005886	GO:0016020	C	"plasma membrane"	Q8LBF7	258	2e-85	-	-	-	-	-	-	-	-	-	-	0	14.603	107.061	59.8484	86.9739	0	5.65735	0.840252
Ai02g10237	1992	EOY27034	674	Uncharacterized protein isoform 1 [Theobroma cacao]	-	958	0.714	GO:0005216	GO:0005215	F	"ion channel activity"	A0MFS9	837	0	-	-	-	-	-	-	-	-	-	-	3.06263	9.96225	321.145	24.8111	142.95	0.959821	1.68273	0.83791
Ai02g29914	684	AFO67216	287	putative elongation factor 1-alpha, partial [Aralia elata]	9e-79	245	0.619	GO:0005737	GO:0005622	C	"cytoplasm"	Q03033	248	1e-79	K03231	"RNA transport"	Q92005	189	1e-57	-	-	-	-	-	55.0642	186.57	247.965	147.359	290.84	111.74	59.5984	0.837318
Ai02g9417	277	EOX93535	407	Acetoacetyl-CoA thiolase 2 isoform 1 [Theobroma cacao]	6e-49	167	0.926	GO:0005737	GO:0005622	C	"cytoplasm"	Q8S4Y1	153	2e-45	K00626	"Propanoate metabolism"	Q8S4Y1	153	2e-46	2.3.1.9	"Acetyl-CoAC-acetyltransferase."	Q8S4Y1	153	8e-46	107.524	146.898	249.597	148.454	227.551	61.2686	74.5186	0.836962
Ai02g25900	483	BAK61832	302	heat shock protein [Citrus unshiu]	1e-69	220	0.806	GO:0005737	GO:0005622	C	"cytoplasm"	P19242	175	6e-56	K13993	"Protein processing in endoplasmic reticulum"	Q6Z6L5	132	1e-39	-	-	-	-	-	0	0	119.364	0.498839	706.218	0	0	0.836408
Ai02g20330	753	EOY15111	251	Alba DNA/RNA-binding protein [Theobroma cacao]	1e-85	262	0.595	-	-	-	-	-	-	-	-	-	-	-	-	-	-	-	-	-	65.9372	132.359	255.817	145.785	530.586	265.558	163.862	0.835806
Ai02g10858	1023	EOY11359	345	Peroxisomal adenine nucleotide carrier 1 [Theobroma cacao]	1e-174	495	0.775	GO:0006810	GO:0006810	P	"transport"	Q76P23	124	9e-32	K13354	"Peroxisome"	O70579	116	6e-30	-	-	-	-	-	35.5451	91.6577	141.436	118.135	352.135	45.9838	23.4188	0.835467
Ai02g14442	114	-	-	-	-	-	-	-	-	-	-	-	-	-	-	-	-	-	-	-	-	-	-	-	221.917	296.478	537.7	411.626	735.879	413.977	130.639	0.834337
Ai02g3375	513	XP_002267841	201	PREDICTED: cysteine proteinase inhibitor 12-like isoform 1 [Vitis vinifera]	3e-84	254	0.787	GO:0010466	GO:0050789	P	"negative regulation of peptidase activity"	Q0JNR2	224	8e-74	-	-	-	-	-	-	-	-	-	-	212.099	269.812	488.972	328.481	1654.72	46.7045	87.6877	0.8309
Ai02g6618	1527	XP_002276275	674	PREDICTED: F-box/ankyrin repeat protein SKIP35-like [Vitis vinifera]	-	837	0.858	GO:0008150	NA	P	"biological_process"	Q9M1Y3	741	0	-	-	-	-	-	-	-	-	-	-	77.9296	47.8916	100.266	50.8696	90.9053	59.5784	46.6696	0.829906
Ai02g24476	462	XP_002324683	150	predicted protein [Populus trichocarpa] gb|EEF03248.1| 17.5 kd heat shock family protein [Populus trichocarpa]	4e-45	152	0.525	GO:0005737	GO:0005622	C	"cytoplasm"	O64564	129	7e-38	K13993	"Protein processing in endoplasmic reticulum"	P31673	99.4	5e-27	-	-	-	-	-	74.137	217.04	279.954	151.186	411.304	216.429	64.867	0.829286
Ai02g9042	1968	EOY27196	642	CTC-interacting domain 3, putative isoform 1 [Theobroma cacao] gb|EOY27199.1| CTC-interacting domain 3, putative isoform 1 [Theobroma cacao]	-	707	0.579	GO:0005737	GO:0005622	C	"cytoplasm"	P53297	85.9	4e-16	-	-	-	-	-	-	-	-	-	-	77.9511	87.1663	174.037	157.353	459.868	119.556	57.9389	0.826193
Ai02g8422	765	EOY12874	254	Aluminum induced protein with YGL and LRDR motifs [Theobroma cacao]	1e-163	459	0.866	-	-	-	-	-	-	-	-	-	-	-	-	-	-	-	-	-	6.25139	161.246	243.199	83.0721	1079.24	103.302	50.9359	0.824785
Ai02g21707	2961	ERP52782	1021	hypothetical protein POPTR_0014s03370g [Populus trichocarpa] gb|ERP52783.1| hypothetical protein POPTR_0014s03370g [Populus trichocarpa]	-	1656	0.775	-	-	-	-	-	-	-	-	-	-	-	-	-	-	-	-	-	55.5855	38.0364	127.759	80.8008	109.371	86.0394	56.1467	0.824291
Ai02g7659	534	XP_002321138	179	predicted protein [Populus trichocarpa] gb|EEE99453.1| hypothetical protein POPTR_0014s15420g [Populus trichocarpa]	1e-74	229	0.893	GO:0005886	GO:0016020	C	"plasma membrane"	O32107	90.9	2e-22	-	-	-	-	-	-	-	-	-	-	26.5227	42.7892	112.901	82.6955	348.009	103.232	34.3749	0.823827
Ai02g1234	703	-	-	-	-	-	-	-	-	-	-	-	-	-	-	-	-	-	-	-	-	-	-	-	38.165	47.6378	134.201	83.0466	261.088	145.515	50.8646	0.823446
Ai02g1247	486	EOX96492	151	Mago nashi family protein [Theobroma cacao]	2e-89	265	0.892	GO:0005654	GO:0005622	C	"nucleoplasm"	P49030	251	9e-86	K12877	"RNA transport"	O23676	248	8e-86	-	-	-	-	-	67.8747	155.327	187.266	160.438	296.565	143.809	102.424	0.821417
Ai02g24160	723	EOY10109	241	Tho complex subunit 7/Mft1p [Theobroma cacao]	1e-134	385	0.83	GO:0005737	GO:0005622	C	"cytoplasm"	Q6I9Y2	89.7	1e-20	K13176	"RNA transport"	Q6I9Y2	89.7	1e-21	-	-	-	-	-	70.2099	97.7511	295.11	196.509	275.407	178.305	64.8476	0.821334
Ai02g23364	1170	XP_002524302	389	60S ribosomal protein L3, putative [Ricinus communis] gb|EEF38042.1| 60S ribosomal protein L3, putative [Ricinus communis]	-	731	0.91	GO:0005737	GO:0005622	C	"cytoplasm"	P35684	687	0	K02925	"Ribosome"	P22738	674	0	-	-	-	-	-	117.335	550.862	1014.78	572.862	1028.81	729.842	442.973	0.821124
Ai02g13231	444	AAY84145	163	late embryogenesis abundant protein [Catharanthus roseus]	9e-30	113	0.467	-	-	-	-	-	-	-	-	-	-	-	-	-	-	-	-	-	1.06538	0	722	20.4184	5340.03	0	0	0.816888
Ai02g12988	1443	XP_002532097	492	phosphoethanolamine n-methyltransferase, putative [Ricinus communis] gb|EEF30287.1| phosphoethanolamine n-methyltransferase, putative [Ricinus communis]	-	866	0.859	GO:0005737	GO:0005622	C	"cytoplasm"	Q9FR44	827	0	K05929	"Glycerophospholipid metabolism"	Q9FR44	827	0	2.1.1.103	"PhosphoethanolamineN-methyltransferase."	Q9FR44	827	0	47.5149	156.7	244.34	224.739	785.06	108.095	117.656	0.816272
Ai02g1803	2043	XP_002277939	770	PREDICTED: poly(A) polymerase-like [Vitis vinifera]	-	904	0.827	GO:0005524	GO:0005488	F	"ATP binding"	Q54J73	405	1e-129	K14376	"mRNA surveillance pathway"	Q9NRJ5	389	1e-126	2.7.7.19	"Polynucleotideadenylyltransferase."	Q54J73	405	1e-130	55.4873	44.8802	103.419	102.418	251.136	82.8964	64.7436	0.816249
Ai02g2742	1707	XP_002279452	568	PREDICTED: malate synthase, glyoxysomal-like [Vitis vinifera]	-	1046	0.884	GO:0005737	GO:0005622	C	"cytoplasm"	P95329	588	0	-	-	-	-	-	2.3.3.9	"Malatesynthase."	P17815	1034	0	0	1.11189	202.396	2.68382	1516.15	3.00705	0.988474	0.815918
Ai02g17274	1182	EMJ12388	402	hypothetical protein PRUPE_ppa006632mg [Prunus persica]	-	588	0.718	GO:0005737	GO:0005622	C	"cytoplasm"	B8JMH0	172	7e-49	-	-	-	-	-	-	-	-	-	-	21.5844	29.0748	100.366	31.2208	605.66	14.4161	18.5909	0.814254
Ai02g12338	582	EMJ24750	180	hypothetical protein PRUPE_ppa012188mg [Prunus persica]	4e-61	195	0.598	-	-	-	-	-	-	-	-	-	-	-	-	-	-	-	-	-	0	2.07777	164.799	7.37927	1251.94	2.42648	0	0.814206
Ai02g17041	2789	XP_002283093	977	PREDICTED: eukaryotic translation initiation factor 3 subunit A [Vitis vinifera]	-	1130	0.664	GO:0005737	GO:0005622	C	"cytoplasm"	Q9LD55	1046	0	K03254	"RNA transport"	Q9LD55	1046	0	-	-	-	-	-	52.623	85.0126	105.524	89.3457	111.487	72.7451	72.4808	0.813501
Ai02g10798	531	XP_002269922	296	PREDICTED: auxin-responsive protein IAA11-like [Vitis vinifera]	2e-77	240	0.683	GO:0046983	GO:0005488	F	"protein dimerization activity"	Q38831	164	4e-50	K14484	"Plant hormone signal transduction"	Q38830	164	6e-51	-	-	-	-	-	20.6694	60.5108	175.285	153.636	202.651	70.1755	58.5573	0.81135
Ai02g13408	1860	EOY18935	779	Glycosyltransferase family protein 47 [Theobroma cacao]	-	1042	0.778	GO:0007224	GO:0050789	P	"smoothened signaling pathway"	Q9Y169	134	1e-31	K02366	"Glycosaminoglycan biosynthesis - heparan sulfate"	Q5RBC3	82.8	4e-16	2.4.1.224	"acetylglucosaminyltransferase."	Q9Y169	134	5e-32	86.8393	73.454	140.764	78.1036	122.33	40.8915	40.2126	0.810503
Ai02g3461	1284	CAN61608	413	hypothetical protein VITISV_040122 [Vitis vinifera]	-	795	0.964	GO:0006096	GO:0008152	P	"glycolysis"	P41376	768	0	K03257	"RNA transport"	Q6Z2Z4	779	0	3.6.4.13	"RNAhelicase."	Q40465	791	0	210.237	367.487	694.759	522.279	1684.36	730.959	205.573	0.809295
Ai02g23189	195	-	-	-	-	-	-	-	-	-	-	-	-	-	-	-	-	-	-	-	-	-	-	-	66.2706	134.999	151.308	115.682	292.384	145.383	98.994	0.809152
Ai02g11246	159	XP_004148521	149	PREDICTED: putative cytochrome c oxidase subunit 6b-like [Cucumis sativus] ref|XP_004163766.1| PREDICTED: putative cytochrome c oxidase subunit 6b-like [Cucumis sativus]	5e-17	76.6	0.85	-	-	-	-	-	-	-	-	-	-	-	-	-	-	-	-	-	0	0	149.305	11.8553	1249.06	0	0	0.806966
Ai02g8593	525	AFY26904	162	hypothetical protein [Morella rubra]	9e-26	104	0.794	-	-	-	-	-	-	-	-	-	-	-	-	-	-	-	-	-	49.7473	85.5942	130.134	77.9374	550.273	91.6293	79.1221	0.804198
Ai02g22230	1185	AAA32794	338	cystolic glyceraldehyde-3-phosphate dehydrogenase [Arabidopsis thaliana] gb|AAA32796.1| glyceraldehyde-3-phosphate dehydrogenase [Arabidopsis thaliana]	-	579	0.769	GO:0006096	GO:0008152	P	"glycolysis"	P25858	561	0	K00134	"Glycolysis / Gluconeogenesis"	P20287	424	1e-148	1.2.1.12	"Glyceraldehyde-3-phosphatedehydrogenase(phosphorylating)."	P25858	561	0	542.384	903.867	1002.95	920.044	2189.71	646.417	458.425	0.803739
Ai02g24773	836	EOY32710	325	Cinnamyl alcohol dehydrogenase, 82967-79323, putative isoform 1 [Theobroma cacao]	1e-151	433	0.728	GO:0006623	GO:0006810	P	"protein targeting to vacuole"	Q9S9N9	206	1e-63	K08695	"Flavonoid biosynthesis"	Q9SEV0	112	1e-28	1.1.1.219	"Dihydrokaempferol4-reductase."	P51103	152	4e-43	27.2325	196.351	205.631	128.002	818.105	69.3172	91.6234	0.803394
Ai02g22058	1656	XP_002280330	509	PREDICTED: LIMR family protein At5g01460 [Vitis vinifera] emb|CBI30389.3| unnamed protein product [Vitis vinifera]	-	855	0.853	GO:0005886	GO:0016020	C	"plasma membrane"	Q9M028	822	0	K14617	"Vitamin digestion and absorption"	Q9SR93	823	0	-	-	-	-	-	49.2769	67.7809	147.319	113.77	138.01	98.5574	65.8159	0.803114
Ai02g23683	414	XP_002283418	168	PREDICTED: probable ribosome biogenesis protein RLP24 [Vitis vinifera] emb|CBI30252.3| unnamed protein product [Vitis vinifera]	3e-69	213	0.787	GO:0006364	GO:0006139	P	"rRNA processing"	O22165	151	1e-46	K02896	"Ribosome"	O22165	151	1e-47	-	-	-	-	-	33.6466	103.88	314.423	248.804	374.219	230.893	125.503	0.802428
Ai02g14005	1086	XP_002276186	341	PREDICTED: uncharacterized protein LOC100259526 [Vitis vinifera] emb|CAN82846.1| hypothetical protein VITISV_007988 [Vitis vinifera] emb|CBI20608.3| unnamed protein product [Vitis vinifera]	-	588	0.845	GO:0005622	GO:0005622	C	"intracellular"	Q8CDF7	81.3	2e-15	-	-	-	-	-	-	-	-	-	-	68.2015	116.565	203.097	180.449	257.377	100.799	43.5139	0.800957
Ai02g10661	687	XP_002533899	260	TGF-beta-inducible nuclear protein, putative [Ricinus communis] gb|EEF28481.1| TGF-beta-inducible nuclear protein, putative [Ricinus communis]	1e-150	425	0.835	GO:0006364	GO:0006139	P	"rRNA processing"	Q54GN8	337	1e-117	-	-	-	-	-	-	-	-	-	-	33.6844	78.6908	135.002	126.794	309.781	124.449	110.209	0.800256
Supplementary Table 8b: List of genes with very high expression in developing endosperm of neem and also with high correlation with nimbin content in the tissues under study.
	BLAST							GO							KEGG					EC					EXPRESSION
Gene Name	query_length	accession_number	length	description	E value	bit score	identical	GOSLIM	GOTERM	Functional category	Description	uniprot id best hit	Bitscore	E-value	KEGG ID	Description	uniprot id best hit	bitscore	E-value	EC ID	Description	uniprot id best hit	bitscore	E-value	Mature leaf	Flower and bud	Developing endosperm	Fruit coat and pulp	Mature fruit	Seedling root	Seedling shoot	Corelation value with nimbin concentration
Ai02g12945	456	XP_002315876	158	predicted protein [Populus trichocarpa] gb|EEF02047.1| Csf-2 family protein [Populus trichocarpa]	3e-56	181	0.595	GO:0009607	GO:0050896	P	"response to biotic stimulus"	Q9SSK9	160	9e-48	-	-	-	-	-	-	-	-	-	-	510.668	607.567	3764.12	1659.77	8729	4937.05	1699.43	0.939465
Ai02g3034	342	XP_004244151	113	PREDICTED: protein translation factor SUI1 homolog isoform 1 [Solanum lycopersicum] ref|XP_004244152.1| PREDICTED: protein translation factor SUI1 homolog isoform 2 [Solanum lycopersicum]	5e-72	217	0.929	GO:0003743	GO:0005488	F	"translation initiation factor activity"	Q0D5W6	212	1e-71	K03113	"RNA transport"	Q0D5W6	212	1e-72	-	-	-	-	-	734.778	963.245	1727	1636.89	5830.52	1699.34	614.085	0.920873
Ai02g16580	885	EOY23669	322	NagB/RpiA/CoA transferase-like superfamily protein [Theobroma cacao]	1e-135	392	0.71	GO:0006098	GO:0006139	P	"pentose-phosphate shunt"	A2Z3C4	342	1e-117	K01057	"Pentose phosphate pathway"	Q69NG5	339	1e-117	3.1.1.31	"6-phosphogluconolactonase."	A2Z3C4	342	1e-117	105.008	202.11	444.646	208.444	2752.97	238.098	76.2734	0.916309
Ai02g34634	360	EOX96183	365	Dihydrodipicolinate synthase isoform 1 [Theobroma cacao]	5e-56	185	0.843	GO:0019877	GO:0008152	P	"diaminopimelate biosynthetic process"	Q42948	180	8e-56	K01714	"Lysine biosynthesis"	Q9FVC8	176	3e-55	4.2.1.52	"Dihydrodipicolinatesynthase."	Q42948	180	3e-56	22.9225	30.4081	82.3683	68.09	551.482	128.483	48.8398	0.911879
Ai02g19086	1179	XP_002327476	386	predicted protein [Populus trichocarpa]	-	687	0.849	GO:0008233	GO:0003824	F	"peptidase activity"	O59413	109	2e-27	-	-	-	-	-	-	-	-	-	-	32.6422	31.3345	540.215	25.068	5072.95	124.539	97.2284	0.911638
Ai02g14512	518	XP_002301301	365	predicted protein [Populus trichocarpa] gb|EEE80574.1| Dihydrodipicolinate synthase family protein [Populus trichocarpa]	7e-86	264	0.75	GO:0019877	GO:0008152	P	"diaminopimelate biosynthetic process"	Q42948	251	6e-83	K01714	"Lysine biosynthesis"	Q9FVC8	246	7e-82	4.2.1.52	"Dihydrodipicolinatesynthase."	Q42948	251	3e-83	23.9385	50.398	71.3878	54.8343	395.629	104.198	56.6299	0.909931
Ai02g35318	471	ACV93250	156	CII small heat shock protein 1 [Prunus salicina]	3e-71	219	0.752	GO:0005737	GO:0005622	C	"cytoplasm"	O82013	201	4e-66	K13993	"Protein processing in endoplasmic reticulum"	Q6Z6L5	111	2e-31	-	-	-	-	-	27.7865	142.599	207.713	108.255	1771.54	275.242	21.4692	0.908933
Ai02g5892	552	EOY33926	288	Eukaryotic translation initiation factor 3G1 [Theobroma cacao]	1e-111	325	0.882	GO:0005737	GO:0005622	C	"cytoplasm"	Q5RK09	160	2e-47	K03248	"RNA transport"	Q5RK09	160	2e-48	-	-	-	-	-	51.0353	166.077	275.238	287.804	830.639	305.698	127.201	0.908927
Ai02g20560	789	XP_002518833	261	Defective in cullin neddylation protein, putative [Ricinus communis] gb|EEF43551.1| Defective in cullin neddylation protein, putative [Ricinus communis]	1e-171	481	0.89	GO:0008150	NA	P	"biological_process"	Q8BZJ7	226	8e-73	-	-	-	-	-	-	-	-	-	-	92.8067	115.083	133.058	119.469	495.613	150.59	68.4539	0.905652
Ai02g572	1317	XP_002528188	445	ran-binding protein, putative [Ricinus communis] gb|EEF34195.1| ran-binding protein, putative [Ricinus communis]	1e-134	400	0.535	-	-	-	-	-	-	-	-	-	-	-	-	-	-	-	-	-	89.5508	176.392	206.401	180.12	841.685	171.947	93.2295	0.904924
Ai02g14825	2106	XP_002278894	703	PREDICTED: heat shock protein 83-like isoform 1 [Vitis vinifera]	-	1124	0.822	GO:0005737	GO:0005622	C	"cytoplasm"	P51819	1110	0	K04079	"Progesterone-mediated oocyte maturation"	Q08277	1065	0	-	-	-	-	-	136.82	114.805	360.245	158.03	3002.65	113.841	29.3814	0.90238
Ai02g15989	990	EEE91806	377	nucleosome assembly family protein [Populus trichocarpa]	1e-142	415	0.746	GO:0006334	GO:0009987	P	"nucleosome assembly"	P28656	149	1e-40	-	-	-	-	-	-	-	-	-	-	82.2249	232.986	421.526	423.647	895.631	371.772	159.71	0.897083
Ai02g17840	654	EOY03827	625	Phosphoinositide 4-kinase gamma 7, gamma 7,ubdk gamma 7,pi4k gamma 7 isoform 1 [Theobroma cacao] gb|EOY03828.1| Phosphoinositide 4-kinase gamma 7, gamma 7,ubdk gamma 7,pi4k gamma 7 isoform 1 [Theobroma cacao]	4e-78	253	0.618	GO:0016773	alcohol group as acceptor"	F	"phosphotransferase activity	GO:0016740	Q9C671	145	-	-	-	-	-	2.7.1.67	"1-phosphatidylinositol4-kinase."	Q9C671	145	2e-39	36.243	86.4412	96.271	79.8203	952.354	151.965	31.0692	0.894058
Ai02g762	1314	EOY03029	437	Eukaryotic release factor 1-3 [Theobroma cacao]	-	841	0.968	GO:0005737	GO:0005622	C	"cytoplasm"	P35614	799	0	K03265	"mRNA surveillance pathway"	P35614	799	0	-	-	-	-	-	126.118	303.825	293.386	248.372	867.009	392.277	114.621	0.892446
Ai02g2331	660	EOX91110	129	Uncharacterized protein TCM_000398 [Theobroma cacao]	1e-27	109	0.648	-	-	-	-	-	-	-	-	-	-	-	-	-	-	-	-	-	21.4612	31.578	56.8751	33.6274	958.665	142.925	53.8914	0.890919
Ai02g19121	540	EMJ01446	200	hypothetical protein PRUPE_ppa015151mg [Prunus persica]	8e-70	218	0.589	GO:0009408	GO:0050896	P	"response to heat"	P30236	213	9e-70	K13993	"Protein processing in endoplasmic reticulum"	Q38806	193	6e-63	-	-	-	-	-	4.80406	56.5515	135.818	59.8278	2733.24	113.436	5.81191	0.889226
Ai02g16890	465	EOY33876	156	HSP20-like chaperones superfamily protein [Theobroma cacao]	1e-82	247	0.764	GO:0005737	GO:0005622	C	"cytoplasm"	P04793	237	2e-80	K13993	"Protein processing in endoplasmic reticulum"	Q9ZW31	222	2e-75	-	-	-	-	-	8.06178	166.438	481.577	149.078	11155.1	238.442	41.5261	0.886322
Ai02g37196	192	-	-	-	-	-	-	-	-	-	-	-	-	-	-	-	-	-	-	-	-	-	-	-	84.9992	134.373	128.007	93.3393	201.717	117.209	112.084	0.884911
Ai02g5159	519	XP_002517606	172	lactoylglutathione lyase, putative [Ricinus communis] gb|EEF44770.1| lactoylglutathione lyase, putative [Ricinus communis]	6e-96	282	0.846	-	-	-	-	-	-	-	-	-	-	-	-	-	-	-	-	-	2.65382	91.2882	87.2193	128.482	879.534	181.588	11.8472	0.88309
Ai02g19914	1014	EOY23478	300	Phosphatase 2C family protein isoform 3 [Theobroma cacao]	1e-178	504	0.758	GO:0003824	GO:0003824	F	"catalytic activity"	Q94AT1	453	1e-158	K14497	"Plant hormone signal transduction"	Q5SN75	141	2e-38	3.1.3.16	"Phosphoproteinphosphatase."	Q94AT1	453	1e-159	10.4321	51.6137	115.34	79.4985	257.118	177.202	55.0254	0.880833
Ai02g26354	603	EMJ01446	200	hypothetical protein PRUPE_ppa015151mg [Prunus persica]	3e-63	135	0.663	GO:0009408	GO:0050896	P	"response to heat"	P30236	130	5e-62	K13993	"Protein processing in endoplasmic reticulum"	Q38806	122	5e-57	-	-	-	-	-	10.6381	46.3357	75.6606	60.2303	3389.94	177.373	6.37098	0.880229
Ai02g25320	381	Q39644	97	RecName: Full=Late embryogenesis abundant protein Lea5 emb|CAA86851.1| Lea5 protein [Citrus sinensis]	1e-22	92.8	0.488	GO:0006950	GO:0050896	P	"response to stress"	Q39644	92.8	2e-24	-	-	-	-	-	-	-	-	-	-	60.4501	491.377	504.612	573.076	14391.4	971.429	205.377	0.879507
Ai02g5114	405	XP_004135834	134	PREDICTED: probable histone H2A variant 3-like [Cucumis sativus] ref|XP_004166619.1| PREDICTED: probable histone H2A variant 3-like [Cucumis sativus]	2e-73	222	0.881	GO:0006334	GO:0009987	P	"nucleosome assembly"	Q9C944	214	5e-72	K11251	"Systemic lupus erythematosus"	Q9C944	214	6e-73	-	-	-	-	-	77.484	172.456	165.08	107.192	316.46	136.36	151.051	0.879261
Ai02g21089	360	EMJ24330	220	hypothetical protein PRUPE_ppa010024mg [Prunus persica]	2e-86	258	0.941	GO:0032436	GO:0050789	P	"positive regulation of proteasomal ubiquitin-dependent protein catabolic process"	Q96PM5	116	4e-32	K10144	"p53 signaling pathway"	Q96PM5	116	4e-33	-	-	-	-	-	33.1587	115.949	105.064	101.479	858.599	149.383	142.333	0.879072
Ai02g19538	2145	XP_002269873	711	PREDICTED: DEAD-box ATP-dependent RNA helicase 7-like [Vitis vinifera]	-	857	0.789	GO:0005524	GO:0005488	F	"ATP binding"	Q39189	737	0	K11594	"RIG-I-like receptor signaling pathway"	O00571	212	3e-59	3.6.4.13	"RNAhelicase."	Q39189	737	0	98.5054	105.859	180.778	157.048	301.632	224.572	87.6506	0.877123
Ai02g12979	1254	EOY19294	417	DNAJ [Theobroma cacao]	-	666	0.801	GO:0006499	GO:0008152	P	"N-terminal protein myristoylation"	Q94AW8	589	0	K09517	"Protein processing in endoplasmic reticulum"	Q8MPX3	149	7e-41	-	-	-	-	-	357.112	808.655	864.161	843.979	2137.51	836.001	211.497	0.877009
Ai02g23597	2403	ADO64264	801	eukaryotic initiation factor iso4G [Carica papaya]	-	1078	0.741	GO:0003677	GO:0005488	F	"DNA binding"	Q03387	800	0	K03260	"RNA transport"	Q76E23	237	6e-65	-	-	-	-	-	48.2442	130.78	119.088	127.107	394.783	110.368	66.3257	0.876082
Ai02g21994	1482	XP_002280897	474	PREDICTED: zinc finger CCCH domain-containing protein 49-like [Vitis vinifera]	-	616	0.683	GO:0003677	GO:0005488	F	"DNA binding"	Q5SNN4	551	0	K12872	"Spliceosome"	Q6Z358	551	0	-	-	-	-	-	73.7466	102.585	91.8589	113.099	691.978	131.695	78.2671	0.873843
Ai02g12840	426	EMJ16329	143	hypothetical protein PRUPE_ppa013043mg [Prunus persica]	1e-80	241	0.823	GO:0009408	GO:0050896	P	"response to heat"	Q9FHQ3	177	5e-57	K13993	"Protein processing in endoplasmic reticulum"	P31673	114	5e-33	-	-	-	-	-	20.166	88.5556	62.6433	63.4861	3078.11	122.888	121.187	0.871379
Ai02g22409	399	NP_001154452	194	putative glutathione S-transferase [Arabidopsis thaliana] gb|AEE34429.1| putative glutathione S-transferase [Arabidopsis thaliana]	2e-75	229	0.846	GO:0016740	GO:0016740	F	"transferase activity"	Q9CPU4	107	2e-29	K00799	"Glutathione metabolism"	Q9CPU4	107	2e-30	2.5.1.18	"Glutathionetransferase."	Q9CPU4	107	1e-29	99.5705	116.421	241.484	146.55	318.083	275.899	158.87	0.870546
Ai02g35040	660	CAA04391	218	glutathione transferase [Carica papaya]	6e-77	238	0.532	GO:0009734	GO:0050789	P	"auxin mediated signaling pathway"	Q03666	233	9e-77	K00799	"Glutathione metabolism"	Q9LZG7	167	1e-51	2.5.1.18	"Glutathionetransferase."	Q03666	233	4e-77	171.701	504.97	363.27	310.091	5300.4	157.377	279.115	0.868167
Ai02g22821	168	XP_002519888	68	conserved hypothetical protein [Ricinus communis] gb|EEF42492.1| conserved hypothetical protein [Ricinus communis]	4e-20	82.4	0.976	-	-	-	-	-	-	-	-	-	-	-	-	-	-	-	-	-	12.89	47.1702	91.2941	75.6701	172.825	121.191	53.1169	0.866518
Ai02g28215	167	-	-	-	-	-	-	-	-	-	-	-	-	-	-	-	-	-	-	-	-	-	-	-	64.8663	87.6257	149.477	189.036	361.721	169.24	111.745	0.86398
Ai02g10208	549	-	-	-	-	-	-	-	-	-	-	-	-	-	-	-	-	-	-	-	-	-	-	-	69.3883	83.136	73.7158	86.3912	960.723	102.451	129.227	0.863761
Ai02g9247	627	XP_002269795	201	PREDICTED: mitochondrial import receptor subunit TOM20 [Vitis vinifera] emb|CBI21351.3| unnamed protein product [Vitis vinifera]	1e-109	319	0.794	GO:0015031	GO:0006810	P	"protein transport"	P92792	283	8e-97	-	-	-	-	-	-	-	-	-	-	79.6211	191.124	147.738	178.962	1466.55	102.486	144.277	0.862838
Ai02g3626	915	AFK34985	305	unknown [Lotus japonicus]	-	570	0.872	GO:0005737	GO:0005622	C	"cytoplasm"	Q8L799	519	0	K00469	"Inositol phosphate metabolism"	Q8L799	519	0	1.13.99.1	"Inositoloxygenase."	Q8L799	519	0	2.7995	163.572	74.7013	71.7793	817.907	101.627	82.195	0.859245
Ai02g8305	255	-	-	-	-	-	-	-	-	-	-	-	-	-	-	-	-	-	-	-	-	-	-	-	28.5559	102.355	110.541	112.187	227.513	103.262	81.4658	0.858884
Ai02g13766	921	AEK32395	302	putative R2R3-MYB transcription factor [Citrus sinensis]	1e-141	407	0.686	GO:0009751	GO:0050896	P	"response to salicylic acid stimulus"	Q9FDW1	241	1e-77	-	-	-	-	-	-	-	-	-	-	140.833	323.688	229.073	224.701	1008.1	208.342	101.655	0.858856
Ai02g17256	367	EOY02943	195	Uncharacterized protein TCM_017339 [Theobroma cacao]	2e-17	81.6	0.438	-	-	-	-	-	-	-	-	-	-	-	-	-	-	-	-	-	33.7066	172.357	202.794	222.642	709.075	397.189	148.621	0.858571
Ai02g6908	1716	CBI33975	2801	unnamed protein product [Vitis vinifera]	-	948	0.801	GO:0015031	GO:0006810	P	"protein transport"	Q54LN2	84.7	1e-15	-	-	-	-	-	-	-	-	-	-	20.7545	37.4221	80.4783	114.35	242.647	100.183	43.4998	0.857132
Ai02g3676	414	ADM67612	166	iron-sulfur cluster scaffold protein [Hevea brasiliensis]	3e-75	228	0.83	GO:0051537	2 sulfur cluster binding"	F	"2 iron	GO:0005488	O49627	221	-	-	-	-	-	-	-	-	-	-	443.038	1183.26	812.074	1094.89	6593.16	761.333	784.085	0.856809
Ai02g21222	2784	EOY12281	916	SWAP/surp domain-containing protein, putative isoform 1 [Theobroma cacao]	-	613	0.529	-	-	-	-	-	-	-	-	-	-	-	-	-	-	-	-	-	30.4766	41.8624	43.7466	64.911	243.539	103.435	49.1042	0.856688
Ai02g5883	1026	CBI22425	435	unnamed protein product [Vitis vinifera]	1e-134	396	0.633	GO:0005886	GO:0016020	C	"plasma membrane"	Q9LJN2	297	2e-96	-	-	-	-	-	-	-	-	-	-	80.3417	49.3528	106.817	85.92	152.672	122.021	91.6813	0.856582
Ai02g10705	330	XP_002311932	85	predicted protein [Populus trichocarpa] gb|ABK92790.1| unknown [Populus trichocarpa] gb|EEE89299.1| hypothetical protein POPTR_0008s01770g [Populus trichocarpa]	3e-16	75.5	0.833	-	-	-	-	-	-	-	-	-	-	-	-	-	-	-	-	-	18.5453	55.4234	103.696	98.6227	266.521	179.205	54.1317	0.856304
Ai02g22659	783	XP_002276973	261	PREDICTED: uncharacterized protein LOC100258605 [Vitis vinifera]	2e-62	204	0.802	-	-	-	-	-	-	-	-	-	-	-	-	-	-	-	-	-	76.427	148.758	114.061	169.08	697.806	138.852	92.428	0.855924
Ai02g16470	366	1TI3	113	Chain A, Solution Structure Of The Thioredoxin H1 From Poplar, A Cppc Active Site Variant	3e-50	162	0.701	GO:0005737	GO:0005622	C	"cytoplasm"	Q43636	160	4e-51	-	-	-	-	-	3.5.1.52	"Peptide-N(4)-(N-acetyl-beta-glucosaminyl)asparagineamidase."	Q5WNE3	82	2e-18	516.819	882.592	1158.18	1907.55	5649.37	1036.69	742.886	0.85399
Ai02g23886	1116	XP_002263670	356	PREDICTED: malate dehydrogenase, glyoxysomal [Vitis vinifera] emb|CBI29427.3| unnamed protein product [Vitis vinifera]	-	639	0.873	GO:0009902	GO:0009987	P	"chloroplast relocation"	Q9ZP05	582	0	K00026	"Citrate cycle (TCA cycle)"	Q9ZP05	582	0	1.1.1.37	"Malatedehydrogenase."	P19446	612	0	75.264	175.353	113.346	143.466	775.191	113.22	84.1274	0.853879
Ai02g1368	723	EMJ08548	235	hypothetical protein PRUPE_ppa010816mg [Prunus persica]	1e-126	365	0.757	GO:0005737	GO:0005622	C	"cytoplasm"	Q9LZ06	314	1e-108	K00799	"Glutathione metabolism"	Q10N44	261	4e-88	2.5.1.18	"Glutathionetransferase."	Q9N1F5	75.5	2e-15	101.683	553.726	347.003	559.932	2537.39	484.648	220.731	0.852905
Ai02g2525	627	EOY22885	211	Mitochondrion-localized small heat shock protein 23.6, putative isoform 1 [Theobroma cacao]	4e-80	245	0.629	GO:0009408	GO:0050896	P	"response to heat"	Q96331	210	5e-68	-	-	-	-	-	-	-	-	-	-	36.256	228.586	165.36	251.283	955.957	309.685	178.698	0.852516
Ai02g24299	1803	AFO64340	605	ABC transporter GCN1 [Hevea brasiliensis]	-	1034	0.914	GO:0005737	GO:0005622	C	"cytoplasm"	P40024	572	0	-	-	-	-	-	3.6.3.41	"Heme-transportingATPase."	Q46RX0	75.9	1e-14	107.15	275.942	153.561	278.354	1970.44	130.631	64.6446	0.849872
Ai02g21002	906	XP_004302024	309	PREDICTED: DNA-damage-repair/toleration protein DRT102-like [Fragaria vesca subsp. vesca]	1e-172	487	0.779	GO:0005737	GO:0005622	C	"cytoplasm"	Q05212	440	1e-156	-	-	-	-	-	-	-	-	-	-	92.443	83.4219	77.1825	106.664	485.78	122.685	116.614	0.849569
Ai02g1778	1353	XP_002305183	452	predicted protein [Populus trichocarpa] gb|EEE85694.1| eukaryotic translation initiation factor 5-2 family protein [Populus trichocarpa]	-	627	0.74	GO:0003743	GO:0005488	F	"translation initiation factor activity"	P48724	546	0	K03262	"RNA transport"	Q9S825	496	1e-174	-	-	-	-	-	176.193	319.806	140.267	217.163	1837.09	267.93	186.249	0.845753
Ai02g17572	933	XP_002319263	325	predicted protein [Populus trichocarpa]	5e-60	202	0.428	-	-	-	-	-	-	-	-	-	-	-	-	-	-	-	-	-	287.766	237.246	184.486	292.862	1725.32	300.617	255.517	0.845377
Ai02g10718	615	EMJ19624	204	hypothetical protein PRUPE_ppa011592mg [Prunus persica]	3e-75	233	0.904	GO:0015031	GO:0006810	P	"protein transport"	Q9M612	215	4e-70	-	-	-	-	-	-	-	-	-	-	66.1351	301.059	369.116	328.789	595.43	317.731	232.847	0.845283
Ai02g4454	1317	EOY07645	438	Lung seven transmembrane receptor family protein [Theobroma cacao]	-	669	0.825	GO:0008150	NA	P	"biological_process"	Q8BUV8	246	9e-75	-	-	-	-	-	-	-	-	-	-	60.226	100.696	84.4528	111.685	293.218	136.866	55.223	0.844927
Ai02g15524	369	XP_002324755	122	predicted protein [Populus trichocarpa] gb|ABK93445.1| unknown [Populus trichocarpa] gb|EEF03320.1| hypothetical protein POPTR_0018s04990g [Populus trichocarpa]	4e-79	236	0.902	-	-	-	-	-	-	-	-	-	-	-	-	-	-	-	-	-	93.732	254.805	219.624	232.214	516.382	268.575	157.259	0.84365
Ai02g4352	1413	EOY25314	454	Kinase superfamily protein isoform 3 [Theobroma cacao]	-	738	0.774	GO:0004672	GO:0016740	F	"protein kinase activity"	Q6Z8C8	517	0	K02087	"Oocyte meiosis"	P29618	207	3e-63	2.7.11.23	"[RNA-polymerase]-subunitkinase."	Q6Z8C8	517	0	127.308	156.292	265.1	348.453	594.769	261.4	177.583	0.843103
Ai02g8793	1380	AGL39698	473	NAC transcription factor 042 [Jatropha curcas]	1e-129	389	0.485	GO:0005737	GO:0005622	C	"cytoplasm"	Q84K00	237	8e-71	-	-	-	-	-	-	-	-	-	-	71.1175	67.57	74.3292	100.938	221.106	101.096	44.8246	0.841415
Ai02g6165	402	AFO66531	248	putative NADH-ubiquinone oxidoreductase 20 kDa subunit [Brassica napus]	1e-42	148	0.588	GO:0005739	GO:0005622	C	"mitochondrion"	Q43844	137	1e-40	K03940	"Alzheimers disease"	Q42577	135	7e-41	1.6.5.3	"NADHdehydrogenase(ubiquinone)."	Q43844	137	6e-41	110.682	142.056	116.6	114.538	259.195	137.619	85.5182	0.841135
Ai02g14441	972	XP_002307959	354	predicted protein [Populus trichocarpa]	1e-167	476	0.724	-	-	-	-	-	-	-	-	-	-	-	-	-	-	-	-	-	216.249	260.693	407.531	378.853	682.789	539.437	202.977	0.840759
Ai02g7621	480	EOY34060	159	HSP20-like chaperones superfamily protein [Theobroma cacao]	5e-73	223	0.704	GO:0005737	GO:0005622	C	"cytoplasm"	P19037	204	2e-67	K13993	"Protein processing in endoplasmic reticulum"	P13853	194	2e-64	-	-	-	-	-	1.94043	10.4146	37.7938	30.3542	1000.26	512.345	18.9907	0.837027
Ai02g11278	390	AFK33978	130	unknown [Lotus japonicus]	3e-59	186	0.876	-	-	-	-	-	-	-	-	-	-	-	-	-	-	-	-	-	26.233	136.835	96.6235	110.388	515.025	211.406	167.299	0.836273
Ai02g18255	267	CBI19237	160	unnamed protein product [Vitis vinifera]	5e-38	132	0.783	GO:0048573	flowering"	P	"photoperiodism	GO:0007275	P93009	102	-	-	-	-	-	-	-	-	-	-	100.836	225.418	193.311	250.283	784.285	406.307	245.922	0.835629
Ai02g22039	1611	XP_002322441	526	predicted protein [Populus trichocarpa] gb|EEF06568.1| hypothetical protein POPTR_0015s13790g [Populus trichocarpa] gb|ERP52436.1| hypothetical protein POPTR_0015s13790g [Populus trichocarpa]	-	726	0.73	GO:0005737	GO:0005622	C	"cytoplasm"	Q3E9C0	301	5e-95	K13412	"Plant-pathogen interaction"	P93759	299	5e-95	2.7.11.1	"Non-specificserine/threonineproteinkinase."	Q3E9C0	301	2e-95	51.2322	54.0369	89.9775	84.4706	125.015	104.244	55.4052	0.832185
Ai02g18886	1581	XP_002285452	524	PREDICTED: U-box domain-containing protein 72 [Vitis vinifera] emb|CBI23714.3| unnamed protein product [Vitis vinifera]	-	922	0.869	GO:0080008	GO:0005622	C	"CUL4 RING ubiquitin ligase complex"	O22785	827	0	K12662	"Spliceosome"	O22212	114	8e-27	2.7.11.1	"Non-specificserine/threonineproteinkinase."	P49695	93.6	4e-19	68.6323	111.625	97.4898	114.111	210.705	104.287	79.8108	0.831342
Ai02g1906	675	ERP51482	226	hypothetical protein POPTR_0016s03070g [Populus trichocarpa]	1e-109	320	0.732	GO:0010466	GO:0050789	P	"negative regulation of peptidase activity"	Q8LC76	256	1e-85	-	-	-	-	-	-	-	-	-	-	815.338	488.747	640.886	874.328	2845.6	436.462	439.177	0.830249
Ai02g23764	417	NP_001154725	142	RING-box protein 1 [Arabidopsis thaliana] gb|AED92860.1| RING-box protein 1 [Arabidopsis thaliana]	2e-59	187	0.7	GO:0042023	GO:0006139	P	"DNA endoreduplication"	Q940X7	186	5e-61	K10611	"Ubiquitin mediated proteolysis"	Q9WTZ1	91.3	2e-24	-	-	-	-	-	82.7992	169.736	169.542	192.998	329.864	156.775	112.548	0.828791
Ai02g22196	771	XP_002524444	258	Acyl-protein thioesterase, putative [Ricinus communis] gb|EEF37884.1| Acyl-protein thioesterase, putative [Ricinus communis]	1e-168	473	0.879	GO:0005737	GO:0005622	C	"cytoplasm"	Q9QYL8	131	3e-36	K06128	"Glycerophospholipid metabolism"	P97823	117	1e-31	3.1.1.1	"Carboxylesterase."	Q53547	101	3e-25	127.327	170.985	188.488	221.031	466.119	320.468	168.899	0.828291
Ai02g24362	1230	NP_001154706	486	DEAD-box ATP-dependent RNA helicase 56 [Arabidopsis thaliana] gb|AED91646.1| DEAD-box ATP-dependent RNA helicase 56 [Arabidopsis thaliana]	-	638	0.788	GO:0005524	GO:0005488	F	"ATP binding"	Q6CH90	394	1e-134	K12812	"Spliceosome"	Q0JM17	339	1e-113	3.6.4.13	"RNAhelicase."	Q6CH90	394	1e-134	144.123	178.285	171.727	223.818	410.569	204.583	196.336	0.821042
Ai02g11056	906	XP_004145927	318	PREDICTED: nuclear migration protein nudC-like [Cucumis sativus] ref|XP_004169942.1| PREDICTED: nuclear migration protein nudC-like [Cucumis sativus]	1e-119	353	0.61	GO:0005737	GO:0005622	C	"cytoplasm"	O35685	214	1e-66	-	-	-	-	-	-	-	-	-	-	64.1441	229.784	249.217	326.733	642.292	186.984	87.4603	0.81965
Ai02g17973	945	CBI37185	432	unnamed protein product [Vitis vinifera]	9e-77	248	0.603	-	-	-	-	-	-	-	-	-	-	-	-	-	-	-	-	-	69.8208	55.7166	96.8869	99.2111	156.727	102.35	107.198	0.818699
Ai02g10195	744	EOY27349	239	Chaperone DnaJ-domain containing protein isoform 3 [Theobroma cacao]	6e-64	207	0.523	-	-	-	-	-	-	-	-	-	-	-	-	-	-	-	-	-	156.516	113.265	73.8584	159.715	1088.16	216.782	285.646	0.817802
Ai02g9659	297	XP_002520493	98	Transcription elongation factor B polypeptide, putative [Ricinus communis] gb|EEF41906.1| Transcription elongation factor B polypeptide, putative [Ricinus communis]	7e-62	190	0.949	GO:0005654	GO:0005622	C	"nucleoplasm"	Q15369	90.5	7e-24	K03872	"Pathways in cancer"	P83941	90.5	7e-25	-	-	-	-	-	94.1946	189.043	122.231	210.998	582.171	194.945	120.841	0.815875
Ai02g19449	327	CBI40892	143	unnamed protein product [Vitis vinifera]	7e-51	164	0.767	-	-	-	-	-	-	-	-	-	-	-	-	-	-	-	-	-	28.1517	70.5875	61.7483	54.4166	161.712	115.185	42.26	0.815551
Ai02g12139	333	NP_001054163	110	Os04g0663300 [Oryza sativa Japonica Group] ref|NP_001055334.1| Os05g0367000 [Oryza sativa Japonica Group] ref|NP_001235659.1| uncharacterized protein LOC100305969 [Glycine max] ref|XP_002299987.1| predicted protein [Populus trichocarpa] ref|XP_002313249.1| predicted protein [Populus trichocarpa] ref|XP_002461532.1| hypothetical protein SORBIDRAFT_02g004290 [Sorghum bicolor] ref|XP_002448706.1| hy…	4e-83	245	1	GO:0005686	GO:0005622	C	"U2 snRNP"	P83871	231	2e-79	K12834	"Spliceosome"	Q0WMV8	244	9e-86	-	-	-	-	-	58.0385	133.022	253.924	199.681	473.426	378.142	237.591	0.815285
Ai02g22671	927	XP_002274093	321	PREDICTED: F-box protein SKIP19 [Vitis vinifera] emb|CAN82327.1| hypothetical protein VITISV_041807 [Vitis vinifera] emb|CBI30970.3| unnamed protein product [Vitis vinifera]	1e-111	332	0.584	GO:0016567	GO:0008152	P	"protein ubiquitination"	Q9M0U9	259	2e-84	-	-	-	-	-	-	-	-	-	-	74.0593	159.243	130.318	150.348	301.821	169.39	87.669	0.815124
Ai02g22907	375	-	-	-	-	-	-	-	-	-	-	-	-	-	-	-	-	-	-	-	-	-	-	-	103.653	566.57	143.549	288.433	2291.11	133.64	63.5294	0.814949
Ai02g12471	702	EOX90604	245	Translation initiation factor IF6 isoform 1 [Theobroma cacao] gb|EOX90605.1| Translation initiation factor IF6 isoform 1 [Theobroma cacao]	1e-140	400	0.962	GO:0005737	GO:0005622	C	"cytoplasm"	Q9M060	386	1e-136	K03264	"Ribosome biogenesis in eukaryotes"	Q9M060	386	1e-137	-	-	-	-	-	110.105	182.078	114.618	198.511	897.388	168.611	268.75	0.813289
Ai02g25959	1095	XP_002278756	424	PREDICTED: elongation factor 1-gamma-like [Vitis vinifera]	1e-128	156	0.664	GO:0006414	GO:0008152	P	"translational elongation"	Q9FUM1	146	1e-122	-	-	-	-	-	-	-	-	-	-	61.0692	197.243	145.034	173.204	408.53	179.954	142.841	0.813044
Ai02g7531	420	XP_002876464	892	predicted protein [Arabidopsis lyrata subsp. lyrata] gb|EFH52723.1| predicted protein [Arabidopsis lyrata subsp. lyrata]	2e-24	105	0.448	GO:0005737	GO:0005622	C	"cytoplasm"	O49160	100	4e-24	K03252	"RNA transport"	O49160	100	4e-25	-	-	-	-	-	64.9761	211.079	258.144	272.085	473.131	326.885	177.327	0.812192
Ai02g18095	864	EOY31556	265	Tetratricopeptide repeat (TPR)-like superfamily protein [Theobroma cacao]	1e-105	315	0.625	GO:0005778	GO:0016020	C	"peroxisomal membrane"	Q99614	151	8e-43	-	-	-	-	-	5.2.1.8	"Peptidylprolylisomerase."	Q43207	80.5	4e-16	44.2169	131.387	110.007	162.209	350.908	140.91	43.5048	0.812156
Ai02g1230	1596	XP_002284064	512	PREDICTED: citrate synthase, glyoxysomal [Vitis vinifera] emb|CBI31775.3| unnamed protein product [Vitis vinifera]	-	846	0.849	GO:0005737	GO:0005622	C	"cytoplasm"	Q8MQU6	523	0	K01647	"Glyoxylate and dicarboxylate metabolism"	Q9LXS6	822	0	2.3.3.1	"Citrate(Si)-synthase."	P49299	825	0	63.8361	167.982	93.3607	127.304	423.073	115.358	55.1567	0.8121
Ai02g15331	561	NP_001242004	185	uncharacterized protein LOC100810273 [Glycine max] gb|ACU21210.1| unknown [Glycine max]	1e-119	343	0.891	GO:0005737	GO:0005622	C	"cytoplasm"	Q84MC7	301	1e-105	K14496	"Plant hormone signal transduction"	Q84MC7	301	1e-106	-	-	-	-	-	105.02	121.009	230.52	162.358	230.504	210.136	122.339	0.810959
Ai02g11394	1695	EOY06990	431	RNA-binding protein, putative isoform 2 [Theobroma cacao]	1e-132	399	0.536	-	-	-	-	-	-	-	-	-	-	-	-	-	-	-	-	-	41.0812	94.0916	98.2778	160.271	318.879	119.659	35.6	0.810296
Ai02g25811	511	XP_002528466	130	30S ribosomal protein S8, putative [Ricinus communis] gb|EEF33949.1| 30S ribosomal protein S8, putative [Ricinus communis] gb|ADR71248.1| 40S ribosomal protein S15A [Hevea brasiliensis] gb|ADR71249.1| 40S ribosomal protein S15B [Hevea brasiliensis]	8e-63	197	1	GO:0005737	GO:0005622	C	"cytoplasm"	P42798	194	2e-63	K02957	"Ribosome"	Q9LX88	192	7e-64	-	-	-	-	-	63.0639	312.76	479.397	323.579	619.662	511.042	259.873	0.808616
Ai02g1636	1227	EOX93849	476	Nuclear transport factor 2 family protein with RNA binding domain, putative isoform 1 [Theobroma cacao]	1e-126	379	0.566	GO:0005737	GO:0005622	C	"cytoplasm"	O94260	108	7e-25	-	-	-	-	-	3.6.4.12	"DNAhelicase."	Q5RB87	91.3	4e-19	42.1596	95.4715	334.085	235.532	406.084	328.186	53.9406	0.804833
Ai02g11403	501	EMJ07224	168	hypothetical protein PRUPE_ppa012468mg [Prunus persica]	1e-71	220	0.643	GO:0003677	GO:0005488	F	"DNA binding"	Q7Y1W9	160	6e-50	-	-	-	-	-	-	-	-	-	-	64.5513	122.385	92.4689	118.651	265.441	160.397	83.6007	0.802016
Ai02g23897	219	XP_004158242	115	PREDICTED: 60S ribosomal protein L6-1-like [Cucumis sativus]	4e-23	92	0.891	GO:0003735	GO:0005198	F	"structural constituent of ribosome"	Q9FZ76	83.2	3e-20	K02934	"Ribosome"	Q9FZ76	83.2	3e-21	-	-	-	-	-	11.014	68.5186	101.101	72.7392	141.904	116.497	59.5695	0.801892
Ai02g32525	213	XP_002319981	72	predicted protein [Populus trichocarpa]	2e-30	109	0.86	GO:0005743	GO:0016020	C	"mitochondrial inner membrane"	P46269	107	2e-31	-	-	-	-	-	-	-	-	-	-	69.0078	191.735	213.23	216.651	356.622	198.984	73.5353	0.801408
Ai02g3785	1566	ADV56681	177	60S ribosomal protein [Phaseolus vulgaris]	2e-78	251	0.763	GO:0003735	GO:0005198	F	"structural constituent of ribosome"	Q9LUQ6	238	6e-75	K02885	"Ribosome"	Q9LUQ6	238	7e-76	-	-	-	-	-	39.1259	167.971	289.396	184.983	323.599	259.641	98.4691	0.800916
Ai02g7243	264	EOY27798	872	Uncharacterized protein TCM_029557 [Theobroma cacao]	6e-31	122	0.875	-	-	-	-	-	-	-	-	-	-	-	-	-	-	-	-	-	56.3281	127.544	121.197	135.282	261.772	186.369	104.996	0.800193
Supplementary Table 8c: List of genes with very high expression in developing endosperm of neem and also with high correlation with salanin content in the tissues under study.
	BLAST							GO							KEGG					EC					EXPRESSION
Gene Name	query_length	accession_number	length	description	E value	bit score	identical	GOSLIM	GOTERM	Functional category	Description	uniprot id best hit	Bitscore	E-value	KEGG ID	Description	uniprot id best hit	bitscore	E-value	EC ID	Description	uniprot id best hit	bitscore	E-value	Mature leaf	Flower and bud	Developing endosperm	Fruit coat and pulp	Mature fruit	Seedling root	Seedling shoot	Corelation value with salalnin concentration
Ai02g14990	1677	EOY00214	610	Nitrate transporter 1.7, putative [Theobroma cacao]	-	723	0.641	GO:0080054	GO:0005215	F	"low affinity nitrate transmembrane transporter activity"	Q8RX77	634	0	K14206	"Protein digestion and absorption"	P91679	94.7	5e-20	-	-	-	-	-	0	0	116.464	5.74675	38.4577	0	0	0.813068
Ai02g17126	240	XP_003635381	68	PREDICTED: stress-associated endoplasmic reticulum protein 2-like isoform 1 [Vitis vinifera] ref|XP_003635382.1| PREDICTED: stress-associated endoplasmic reticulum protein 2-like isoform 2 [Vitis vinifera]	4e-22	88.6	0.804	-	-	-	-	-	-	-	-	-	-	-	-	-	-	-	-	-	0	85.4401	1729.78	1085.45	1392.4	567.58	2.47119	0.81248
Ai02g2288	1665	EOX91925	520	AP2-like ethylene-responsive transcription factor AIL6 [Theobroma cacao]	-	672	0.698	GO:0060771	GO:0007275	P	"phyllotactic patterning"	Q52QU2	514	1e-176	-	-	-	-	-	-	-	-	-	-	0	2.88328	243.728	21.2477	83.0055	9.64556	2.02924	0.809897
Ai02g3957	1652	XP_002521798	587	Patellin-5, putative [Ricinus communis] gb|EEF40608.1| Patellin-5, putative [Ricinus communis]	-	712	0.676	GO:0005737	GO:0005622	C	"cytoplasm"	Q56Z59	563	0	-	-	-	-	-	-	-	-	-	-	91.762	141.933	529.279	172.413	299.042	219.696	84.9795	0.820194
Ai02g5544	1236	XP_002517941	410	catalytic, putative [Ricinus communis] gb|EEF44459.1| catalytic, putative [Ricinus communis]	-	646	0.757	GO:0005737	GO:0005622	C	"cytoplasm"	O89112	241	1e-74	-	-	-	-	-	-	-	-	-	-	109.641	79.175	121.165	81.5707	174.793	53.9206	31.2789	0.803936
