# Supplementary material for: Comprehensive analyses of genomes, transcriptomes and metabolites of neem tree
Source: PeerJ. 2015 Aug 6;3:e1066. doi: 10.7717/peerj.1066 (PMC4540028; doi:10.7717/peerj.1066)
Supplement: Table S9 [file peerj-03-1066-s009.xls]

## Sheet: Sheet1
Supplementary Table 9: Multigene family in the neem genome
Family name	Gene ID
AiPROT000001	Ai02g1,Ai02g10215
AiPROT000002	Ai02g2,Ai02g17753
AiPROT000004	Ai02g4,Ai02g19635
AiPROT000005	Ai02g9,Ai02g28926
AiPROT000006	Ai02g10,Ai02g28927
AiPROT000008	Ai02g15,Ai02g33448
AiPROT000009	Ai02g17,Ai02g29659
AiPROT000010	Ai02g18,Ai02g28818
AiPROT000012	Ai02g22,Ai02g28899
AiPROT000013	Ai02g23,Ai02g28900
AiPROT000014	Ai02g24,Ai02g28905
AiPROT000015	Ai02g25,Ai02g28906
AiPROT000018	Ai02g35,Ai02g29113
AiPROT000019	Ai02g36,Ai02g18574
AiPROT000026	Ai02g50,Ai02g29066
AiPROT000027	Ai02g51,Ai02g17422
AiPROT000028	Ai02g52,Ai02g4781,Ai02g4782
AiPROT000031	Ai02g56,Ai02g12835
AiPROT000034	Ai02g62,Ai02g6136
AiPROT000035	Ai02g70,Ai02g1086
AiPROT000036	Ai02g71,Ai02g17054
AiPROT000042	Ai02g78,Ai02g32322
AiPROT000046	Ai02g84,Ai02g27205
AiPROT000050	Ai02g91,Ai02g28953
AiPROT000051	Ai02g92,Ai02g30803
AiPROT000054	Ai02g97,Ai02g29829,Ai02g27434
AiPROT000065	Ai02g114,Ai02g7997
AiPROT000067	Ai02g117,Ai02g26775
AiPROT000071	Ai02g123,Ai02g1412
AiPROT000073	Ai02g125,Ai02g29367
AiPROT000074	Ai02g126,Ai02g8887
AiPROT000075	Ai02g127,Ai02g8888
AiPROT000076	Ai02g129,Ai02g2566
AiPROT000077	Ai02g131,Ai02g25280
AiPROT000079	Ai02g135,Ai02g28901
AiPROT000080	Ai02g136,Ai02g28845
AiPROT000082	Ai02g138,Ai02g32548
AiPROT000086	Ai02g145,Ai02g29638
AiPROT000087	Ai02g146,Ai02g30755
AiPROT000088	Ai02g147,Ai02g6568
AiPROT000089	Ai02g148,Ai02g7304
AiPROT000090	Ai02g149,Ai02g11083
AiPROT000091	Ai02g150,Ai02g14560,Ai02g6149
AiPROT000095	Ai02g156,Ai02g18550
AiPROT000099	Ai02g165,Ai02g31658
AiPROT000101	Ai02g167,Ai02g28168
AiPROT000103	Ai02g170,Ai02g15216
AiPROT000106	Ai02g173,Ai02g20365,Ai02g14980,Ai02g3985,Ai02g2693
AiPROT000108	Ai02g176,Ai02g32912
AiPROT000111	Ai02g184,Ai02g38183
AiPROT000117	Ai02g191,Ai02g30176
AiPROT000118	Ai02g192,Ai02g34069
AiPROT000125	Ai02g202,Ai02g27380
AiPROT000126	Ai02g204,Ai02g9372
AiPROT000128	Ai02g207,Ai02g3116
AiPROT000135	Ai02g216,Ai02g4822,Ai02g13371,Ai02g11985
AiPROT000136	Ai02g217,Ai02g27335
AiPROT000137	Ai02g218,Ai02g26552,Ai02g23426,Ai02g23399,Ai02g28123
AiPROT000142	Ai02g223,Ai02g23397,Ai02g13725
AiPROT000143	Ai02g224,Ai02g13726
AiPROT000144	Ai02g225,Ai02g32987
AiPROT000145	Ai02g226,Ai02g29551
AiPROT000146	Ai02g227,Ai02g31252
AiPROT000147	Ai02g229,Ai02g33145
AiPROT000148	Ai02g230,Ai02g31582
AiPROT000151	Ai02g234,Ai02g32531
AiPROT000153	Ai02g238,Ai02g17881
AiPROT000159	Ai02g245,Ai02g1614
AiPROT000164	Ai02g257,Ai02g30159
AiPROT000165	Ai02g262,Ai02g6667
AiPROT000167	Ai02g265,Ai02g16601
AiPROT000171	Ai02g269,Ai02g32483,Ai02g34234,Ai02g32561
AiPROT000174	Ai02g272,Ai02g26383
AiPROT000175	Ai02g273,Ai02g29462
AiPROT000178	Ai02g277,Ai02g27009
AiPROT000186	Ai02g291,Ai02g41277,Ai02g38088,Ai02g29070
AiPROT000187	Ai02g292,Ai02g30465
AiPROT000190	Ai02g299,Ai02g21017
AiPROT000192	Ai02g301,Ai02g17209
AiPROT000197	Ai02g309,Ai02g31478,Ai02g35136
AiPROT000203	Ai02g320,Ai02g321
AiPROT000206	Ai02g324,Ai02g325
AiPROT000208	Ai02g328,Ai02g21464
AiPROT000210	Ai02g332,Ai02g8862
AiPROT000218	Ai02g344,Ai02g19834
AiPROT000220	Ai02g348,Ai02g12189
AiPROT000222	Ai02g354,Ai02g356
AiPROT000227	Ai02g365,Ai02g18254
AiPROT000229	Ai02g367,Ai02g8807
AiPROT000233	Ai02g373,Ai02g13900
AiPROT000234	Ai02g374,Ai02g29650
AiPROT000242	Ai02g387,Ai02g26807
AiPROT000247	Ai02g393,Ai02g24603
AiPROT000249	Ai02g396,Ai02g1790
AiPROT000250	Ai02g397,Ai02g6995
AiPROT000255	Ai02g402,Ai02g2859
AiPROT000261	Ai02g411,Ai02g30567
AiPROT000263	Ai02g414,Ai02g26329
AiPROT000268	Ai02g420,Ai02g29138
AiPROT000269	Ai02g422,Ai02g423
AiPROT000271	Ai02g425,Ai02g428,Ai02g427
AiPROT000272	Ai02g426,Ai02g25882
AiPROT000274	Ai02g432,Ai02g433
AiPROT000278	Ai02g440,Ai02g441
AiPROT000280	Ai02g444,Ai02g18942
AiPROT000281	Ai02g445,Ai02g32075
AiPROT000284	Ai02g451,Ai02g22787
AiPROT000294	Ai02g466,Ai02g29420
AiPROT000295	Ai02g468,Ai02g29147
AiPROT000298	Ai02g473,Ai02g29598
AiPROT000299	Ai02g474,Ai02g17669
AiPROT000300	Ai02g475,Ai02g561
AiPROT000302	Ai02g479,Ai02g480
AiPROT000305	Ai02g485,Ai02g30843
AiPROT000308	Ai02g491,Ai02g34108
AiPROT000310	Ai02g493,Ai02g9204
AiPROT000313	Ai02g496,Ai02g983
AiPROT000315	Ai02g501,Ai02g27476
AiPROT000317	Ai02g509,Ai02g30907
AiPROT000321	Ai02g513,Ai02g19629,Ai02g29879
AiPROT000322	Ai02g514,Ai02g33047,Ai02g32957,Ai02g31751
AiPROT000324	Ai02g516,Ai02g11598,Ai02g11599
AiPROT000325	Ai02g517,Ai02g11600
AiPROT000328	Ai02g520,Ai02g27253
AiPROT000336	Ai02g529,Ai02g555
AiPROT000340	Ai02g536,Ai02g8580,Ai02g20774,Ai02g6809,Ai02g13614,Ai02g17822
AiPROT000341	Ai02g542,Ai02g13878,Ai02g22930
AiPROT000342	Ai02g543,Ai02g14462
AiPROT000344	Ai02g546,Ai02g41091
AiPROT000347	Ai02g550,Ai02g8224
AiPROT000348	Ai02g551,Ai02g8223
AiPROT000352	Ai02g556,Ai02g24576,Ai02g16244
AiPROT000354	Ai02g558,Ai02g18727
AiPROT000357	Ai02g566,Ai02g16056,Ai02g13754,Ai02g2109
AiPROT000358	Ai02g569,Ai02g29206
AiPROT000362	Ai02g573,Ai02g25918
AiPROT000365	Ai02g577,Ai02g16839
AiPROT000367	Ai02g579,Ai02g22720,Ai02g21015
AiPROT000368	Ai02g581,Ai02g29326,Ai02g20069
AiPROT000370	Ai02g584,Ai02g21742,Ai02g19505,Ai02g8011
AiPROT000372	Ai02g586,Ai02g17893
AiPROT000373	Ai02g588,Ai02g589
AiPROT000374	Ai02g590,Ai02g8065
AiPROT000375	Ai02g591,Ai02g31556
AiPROT000377	Ai02g595,Ai02g4836
AiPROT000385	Ai02g607,Ai02g21261
AiPROT000388	Ai02g610,Ai02g34936
AiPROT000391	Ai02g613,Ai02g7671
AiPROT000397	Ai02g621,Ai02g6478
AiPROT000401	Ai02g627,Ai02g24267
AiPROT000402	Ai02g628,Ai02g26162,Ai02g11456
AiPROT000407	Ai02g634,Ai02g9424
AiPROT000410	Ai02g638,Ai02g34230
AiPROT000415	Ai02g644,Ai02g31891,Ai02g19140
AiPROT000416	Ai02g645,Ai02g30293
AiPROT000423	Ai02g659,Ai02g1300
AiPROT000427	Ai02g665,Ai02g20114
AiPROT000430	Ai02g669,Ai02g23970,Ai02g23015,Ai02g22471,Ai02g4707
AiPROT000431	Ai02g670,Ai02g7618
AiPROT000444	Ai02g685,Ai02g31951
AiPROT000447	Ai02g689,Ai02g29077
AiPROT000449	Ai02g691,Ai02g25226
AiPROT000454	Ai02g697,Ai02g14016
AiPROT000457	Ai02g700,Ai02g5409
AiPROT000459	Ai02g705,Ai02g29754,Ai02g16656
AiPROT000463	Ai02g713,Ai02g9083
AiPROT000464	Ai02g714,Ai02g9108
AiPROT000467	Ai02g718,Ai02g28378
AiPROT000469	Ai02g720,Ai02g23469
AiPROT000470	Ai02g722,Ai02g26604
AiPROT000471	Ai02g723,Ai02g30749
AiPROT000472	Ai02g726,Ai02g16351
AiPROT000473	Ai02g727,Ai02g31519
AiPROT000474	Ai02g729,Ai02g5960
AiPROT000475	Ai02g731,Ai02g732
AiPROT000476	Ai02g733,Ai02g11220,Ai02g6811
AiPROT000477	Ai02g735,Ai02g31979
AiPROT000478	Ai02g738,Ai02g1936
AiPROT000482	Ai02g747,Ai02g31557
AiPROT000486	Ai02g754,Ai02g32444,Ai02g29717
AiPROT000490	Ai02g760,Ai02g11303
AiPROT000492	Ai02g762,Ai02g12531
AiPROT000495	Ai02g765,Ai02g31446
AiPROT000498	Ai02g768,Ai02g30004
AiPROT000499	Ai02g771,Ai02g4253
AiPROT000502	Ai02g777,Ai02g20194
AiPROT000505	Ai02g782,Ai02g6907
AiPROT000506	Ai02g783,Ai02g19733
AiPROT000507	Ai02g784,Ai02g3896
AiPROT000511	Ai02g788,Ai02g4094
AiPROT000512	Ai02g795,Ai02g30471
AiPROT000514	Ai02g798,Ai02g29388
AiPROT000516	Ai02g802,Ai02g3443
AiPROT000517	Ai02g803,Ai02g28022
AiPROT000518	Ai02g804,Ai02g26079
AiPROT000519	Ai02g806,Ai02g12854,Ai02g12853
AiPROT000520	Ai02g807,Ai02g4847
AiPROT000522	Ai02g811,Ai02g31221
AiPROT000530	Ai02g820,Ai02g4196
AiPROT000533	Ai02g826,Ai02g29866
AiPROT000536	Ai02g829,Ai02g4519
AiPROT000542	Ai02g836,Ai02g29958
AiPROT000544	Ai02g838,Ai02g31713
AiPROT000545	Ai02g840,Ai02g9727
AiPROT000546	Ai02g843,Ai02g29256
AiPROT000548	Ai02g847,Ai02g27372
AiPROT000551	Ai02g852,Ai02g26471
AiPROT000560	Ai02g866,Ai02g33524
AiPROT000561	Ai02g868,Ai02g32126
AiPROT000565	Ai02g873,Ai02g7383
AiPROT000567	Ai02g877,Ai02g7543,Ai02g7546
AiPROT000570	Ai02g882,Ai02g14393
AiPROT000574	Ai02g890,Ai02g27408
AiPROT000585	Ai02g908,Ai02g19827
AiPROT000590	Ai02g916,Ai02g8804
AiPROT000601	Ai02g929,Ai02g3198
AiPROT000602	Ai02g930,Ai02g31982
AiPROT000603	Ai02g931,Ai02g1302
AiPROT000604	Ai02g934,Ai02g24051,Ai02g16042
AiPROT000610	Ai02g943,Ai02g22237,Ai02g1953
AiPROT000611	Ai02g944,Ai02g14290,Ai02g20089,Ai02g945
AiPROT000618	Ai02g953,Ai02g31940
AiPROT000625	Ai02g960,Ai02g18906,Ai02g32006
AiPROT000626	Ai02g961,Ai02g26691,Ai02g21814
AiPROT000632	Ai02g967,Ai02g22792
AiPROT000633	Ai02g968,Ai02g29471
AiPROT000634	Ai02g969,Ai02g24351
AiPROT000635	Ai02g972,Ai02g10810
AiPROT000638	Ai02g978,Ai02g27818
AiPROT000644	Ai02g989,Ai02g17290
AiPROT000645	Ai02g991,Ai02g9405
AiPROT000653	Ai02g999,Ai02g1000
AiPROT000658	Ai02g1006,Ai02g10840
AiPROT000661	Ai02g1009,Ai02g8690
AiPROT000667	Ai02g1016,Ai02g22646
AiPROT000669	Ai02g1018,Ai02g13398
AiPROT000673	Ai02g1025,Ai02g29429
AiPROT000674	Ai02g1027,Ai02g13946
AiPROT000675	Ai02g1028,Ai02g18374,Ai02g13916
AiPROT000680	Ai02g1041,Ai02g24207
AiPROT000683	Ai02g1046,Ai02g32481
AiPROT000685	Ai02g1049,Ai02g3366
AiPROT000688	Ai02g1055,Ai02g31082
AiPROT000699	Ai02g1067,Ai02g30916
AiPROT000707	Ai02g1079,Ai02g16145
AiPROT000713	Ai02g1094,Ai02g19239
AiPROT000715	Ai02g1096,Ai02g17318
AiPROT000720	Ai02g1106,Ai02g15346
AiPROT000721	Ai02g1107,Ai02g27634
AiPROT000723	Ai02g1109,Ai02g14053
AiPROT000724	Ai02g1110,Ai02g29919,Ai02g1649,Ai02g5281
AiPROT000725	Ai02g1111,Ai02g2767
AiPROT000726	Ai02g1113,Ai02g30037
AiPROT000727	Ai02g1115,Ai02g20553,Ai02g3628,Ai02g1116
AiPROT000728	Ai02g1117,Ai02g26424
AiPROT000731	Ai02g1123,Ai02g28646
AiPROT000733	Ai02g1126,Ai02g27466
AiPROT000735	Ai02g1129,Ai02g1229
AiPROT000738	Ai02g1137,Ai02g11731
AiPROT000739	Ai02g1138,Ai02g17505
AiPROT000746	Ai02g1148,Ai02g28284
AiPROT000747	Ai02g1149,Ai02g26535
AiPROT000750	Ai02g1156,Ai02g18969
AiPROT000751	Ai02g1157,Ai02g1367
AiPROT000753	Ai02g1160,Ai02g2338
AiPROT000754	Ai02g1164,Ai02g13458,Ai02g1165
AiPROT000756	Ai02g1168,Ai02g31306
AiPROT000757	Ai02g1169,Ai02g33666
AiPROT000759	Ai02g1173,Ai02g25039,Ai02g29468
AiPROT000769	Ai02g1190,Ai02g19026
AiPROT000770	Ai02g1193,Ai02g18303
AiPROT000774	Ai02g1197,Ai02g8208
AiPROT000782	Ai02g1206,Ai02g25164
AiPROT000786	Ai02g1213,Ai02g17342
AiPROT000787	Ai02g1214,Ai02g22656
AiPROT000791	Ai02g1221,Ai02g11237
AiPROT000793	Ai02g1223,Ai02g34334
AiPROT000795	Ai02g1231,Ai02g4017
AiPROT000798	Ai02g1237,Ai02g1238
AiPROT000799	Ai02g1240,Ai02g2402
AiPROT000805	Ai02g1248,Ai02g37393
AiPROT000806	Ai02g1249,Ai02g3567,Ai02g2200
AiPROT000812	Ai02g1264,Ai02g29985
AiPROT000813	Ai02g1265,Ai02g18938
AiPROT000814	Ai02g1271,Ai02g30972
AiPROT000815	Ai02g1272,Ai02g3495
AiPROT000818	Ai02g1275,Ai02g17998
AiPROT000820	Ai02g1279,Ai02g5888
AiPROT000823	Ai02g1285,Ai02g31729
AiPROT000825	Ai02g1288,Ai02g4700
AiPROT000830	Ai02g1299,Ai02g18838
AiPROT000831	Ai02g1301,Ai02g6659
AiPROT000838	Ai02g1312,Ai02g6177
AiPROT000840	Ai02g1314,Ai02g21504
AiPROT000841	Ai02g1315,Ai02g12939
AiPROT000852	Ai02g1329,Ai02g26738
AiPROT000856	Ai02g1334,Ai02g12456
AiPROT000864	Ai02g1345,Ai02g23231
AiPROT000866	Ai02g1348,Ai02g29285,Ai02g28971
AiPROT000867	Ai02g1349,Ai02g30161
AiPROT000875	Ai02g1361,Ai02g26609
AiPROT000877	Ai02g1365,Ai02g22978
AiPROT000878	Ai02g1366,Ai02g29464
AiPROT000879	Ai02g1368,Ai02g16089
AiPROT000886	Ai02g1375,Ai02g35030
AiPROT000890	Ai02g1379,Ai02g9412
AiPROT000893	Ai02g1382,Ai02g18783,Ai02g17097,Ai02g13057,Ai02g4804
AiPROT000895	Ai02g1384,Ai02g11004
AiPROT000896	Ai02g1386,Ai02g5924
AiPROT000898	Ai02g1393,Ai02g21933
AiPROT000899	Ai02g1395,Ai02g13418,Ai02g12315,Ai02g24951
AiPROT000904	Ai02g1403,Ai02g3649
AiPROT000905	Ai02g1404,Ai02g11855
AiPROT000906	Ai02g1405,Ai02g31046
AiPROT000907	Ai02g1410,Ai02g25953,Ai02g14536
AiPROT000909	Ai02g1415,Ai02g8179
AiPROT000910	Ai02g1416,Ai02g19818
AiPROT000920	Ai02g1432,Ai02g20109
AiPROT000929	Ai02g1442,Ai02g14502
AiPROT000931	Ai02g1444,Ai02g20034
AiPROT000932	Ai02g1446,Ai02g9316,Ai02g29852
AiPROT000941	Ai02g1461,Ai02g11344
AiPROT000954	Ai02g1477,Ai02g26826
AiPROT000955	Ai02g1479,Ai02g31782
AiPROT000956	Ai02g1480,Ai02g34699
AiPROT000958	Ai02g1483,Ai02g1484
AiPROT000962	Ai02g1489,Ai02g30304
AiPROT000969	Ai02g1497,Ai02g18305
AiPROT000975	Ai02g1504,Ai02g27195
AiPROT000976	Ai02g1505,Ai02g10439
AiPROT000981	Ai02g1514,Ai02g31800
AiPROT000992	Ai02g1530,Ai02g14678
AiPROT000997	Ai02g1536,Ai02g30791
AiPROT000999	Ai02g1539,Ai02g15780
AiPROT001002	Ai02g1543,Ai02g24020
AiPROT001004	Ai02g1545,Ai02g1741
AiPROT001005	Ai02g1546,Ai02g18556
AiPROT001011	Ai02g1553,Ai02g1554
AiPROT001012	Ai02g1555,Ai02g1556
AiPROT001014	Ai02g1558,Ai02g23319
AiPROT001016	Ai02g1562,Ai02g20145
AiPROT001017	Ai02g1563,Ai02g30476,Ai02g14257
AiPROT001022	Ai02g1569,Ai02g9814
AiPROT001024	Ai02g1571,Ai02g20828
AiPROT001027	Ai02g1578,Ai02g13770
AiPROT001032	Ai02g1585,Ai02g9033
AiPROT001036	Ai02g1597,Ai02g22657
AiPROT001037	Ai02g1599,Ai02g32311
AiPROT001038	Ai02g1601,Ai02g31647,Ai02g30768,Ai02g20603,Ai02g7483,Ai02g7482
AiPROT001040	Ai02g1605,Ai02g1830
AiPROT001041	Ai02g1606,Ai02g4001
AiPROT001044	Ai02g1610,Ai02g24465
AiPROT001046	Ai02g1618,Ai02g37865
AiPROT001048	Ai02g1620,Ai02g9927
AiPROT001049	Ai02g1621,Ai02g5302
AiPROT001051	Ai02g1624,Ai02g8835
AiPROT001056	Ai02g1630,Ai02g8101
AiPROT001057	Ai02g1631,Ai02g2002
AiPROT001058	Ai02g1632,Ai02g19473
AiPROT001070	Ai02g1651,Ai02g16709
AiPROT001071	Ai02g1653,Ai02g7214,Ai02g2530
AiPROT001072	Ai02g1656,Ai02g9297
AiPROT001073	Ai02g1657,Ai02g1660
AiPROT001077	Ai02g1664,Ai02g15372
AiPROT001078	Ai02g1665,Ai02g31558
AiPROT001079	Ai02g1667,Ai02g30641
AiPROT001080	Ai02g1668,Ai02g18841
AiPROT001084	Ai02g1673,Ai02g2452
AiPROT001089	Ai02g1678,Ai02g26407
AiPROT001097	Ai02g1696,Ai02g14704,Ai02g33795
AiPROT001104	Ai02g1705,Ai02g8026
AiPROT001109	Ai02g1710,Ai02g21985
AiPROT001113	Ai02g1714,Ai02g30548
AiPROT001120	Ai02g1724,Ai02g32120
AiPROT001125	Ai02g1731,Ai02g12192
AiPROT001126	Ai02g1732,Ai02g29481
AiPROT001129	Ai02g1735,Ai02g4695
AiPROT001131	Ai02g1737,Ai02g26028
AiPROT001132	Ai02g1738,Ai02g26027
AiPROT001135	Ai02g1742,Ai02g20014,Ai02g15887
AiPROT001150	Ai02g1764,Ai02g26286,Ai02g20274,Ai02g9385
AiPROT001155	Ai02g1772,Ai02g23641,Ai02g16993
AiPROT001158	Ai02g1777,Ai02g4619
AiPROT001159	Ai02g1778,Ai02g21397
AiPROT001160	Ai02g1779,Ai02g19279
AiPROT001162	Ai02g1782,Ai02g11546
AiPROT001169	Ai02g1800,Ai02g16379
AiPROT001171	Ai02g1802,Ai02g16718
AiPROT001172	Ai02g1803,Ai02g14866
AiPROT001173	Ai02g1804,Ai02g38522
AiPROT001183	Ai02g1818,Ai02g4387
AiPROT001184	Ai02g1820,Ai02g27119
AiPROT001185	Ai02g1822,Ai02g27569
AiPROT001187	Ai02g1824,Ai02g16899
AiPROT001188	Ai02g1826,Ai02g24719
AiPROT001191	Ai02g1829,Ai02g26841
AiPROT001195	Ai02g1835,Ai02g23671
AiPROT001197	Ai02g1837,Ai02g12981
AiPROT001198	Ai02g1838,Ai02g31476
AiPROT001207	Ai02g1848,Ai02g14403,Ai02g33259
AiPROT001208	Ai02g1850,Ai02g9597
AiPROT001209	Ai02g1851,Ai02g7582,Ai02g16486
AiPROT001210	Ai02g1852,Ai02g37591
AiPROT001212	Ai02g1860,Ai02g1861
AiPROT001213	Ai02g1862,Ai02g13847
AiPROT001214	Ai02g1863,Ai02g33961
AiPROT001216	Ai02g1865,Ai02g3781
AiPROT001217	Ai02g1866,Ai02g5845
AiPROT001221	Ai02g1870,Ai02g3898,Ai02g31805
AiPROT001222	Ai02g1871,Ai02g9916
AiPROT001224	Ai02g1873,Ai02g28148
AiPROT001226	Ai02g1876,Ai02g23576,Ai02g14018,Ai02g4056
AiPROT001228	Ai02g1878,Ai02g18987
AiPROT001230	Ai02g1880,Ai02g11683
AiPROT001232	Ai02g1882,Ai02g34104
AiPROT001234	Ai02g1886,Ai02g30056
AiPROT001236	Ai02g1888,Ai02g22731
AiPROT001237	Ai02g1890,Ai02g13954
AiPROT001244	Ai02g1899,Ai02g23053
AiPROT001254	Ai02g1915,Ai02g27836
AiPROT001258	Ai02g1920,Ai02g25059
AiPROT001259	Ai02g1921,Ai02g13948
AiPROT001264	Ai02g1927,Ai02g37023
AiPROT001270	Ai02g1935,Ai02g27717
AiPROT001271	Ai02g1937,Ai02g26637
AiPROT001272	Ai02g1938,Ai02g26636
AiPROT001273	Ai02g1939,Ai02g3107
AiPROT001274	Ai02g1943,Ai02g16338
AiPROT001285	Ai02g1959,Ai02g22259
AiPROT001286	Ai02g1963,Ai02g9345
AiPROT001289	Ai02g1970,Ai02g27762
AiPROT001291	Ai02g1972,Ai02g11726,Ai02g34118
AiPROT001295	Ai02g1978,Ai02g15524
AiPROT001298	Ai02g1982,Ai02g30570
AiPROT001302	Ai02g1989,Ai02g11962
AiPROT001304	Ai02g1993,Ai02g32902
AiPROT001313	Ai02g2013,Ai02g27229
AiPROT001314	Ai02g2014,Ai02g27536
AiPROT001321	Ai02g2028,Ai02g2029
AiPROT001329	Ai02g2042,Ai02g3999
AiPROT001332	Ai02g2045,Ai02g9299
AiPROT001335	Ai02g2048,Ai02g25211
AiPROT001336	Ai02g2051,Ai02g35922
AiPROT001338	Ai02g2054,Ai02g10419
AiPROT001341	Ai02g2060,Ai02g18421
AiPROT001344	Ai02g2067,Ai02g20317
AiPROT001345	Ai02g2068,Ai02g33503
AiPROT001346	Ai02g2069,Ai02g34161
AiPROT001347	Ai02g2070,Ai02g9881
AiPROT001352	Ai02g2077,Ai02g25123
AiPROT001359	Ai02g2086,Ai02g26182
AiPROT001360	Ai02g2088,Ai02g22829
AiPROT001361	Ai02g2089,Ai02g29313
AiPROT001369	Ai02g2098,Ai02g27252
AiPROT001370	Ai02g2099,Ai02g16820
AiPROT001371	Ai02g2100,Ai02g7976
AiPROT001374	Ai02g2105,Ai02g25408
AiPROT001380	Ai02g2112,Ai02g37537
AiPROT001381	Ai02g2113,Ai02g2115
AiPROT001382	Ai02g2114,Ai02g16889,Ai02g16888,Ai02g16890
AiPROT001387	Ai02g2125,Ai02g11496
AiPROT001394	Ai02g2133,Ai02g22149,Ai02g22147
AiPROT001396	Ai02g2135,Ai02g4537,Ai02g4536
AiPROT001397	Ai02g2136,Ai02g35142
AiPROT001408	Ai02g2153,Ai02g7346
AiPROT001410	Ai02g2155,Ai02g6975
AiPROT001411	Ai02g2156,Ai02g27930
AiPROT001414	Ai02g2159,Ai02g2160,Ai02g31762
AiPROT001418	Ai02g2164,Ai02g24593
AiPROT001421	Ai02g2168,Ai02g32462
AiPROT001425	Ai02g2174,Ai02g18188
AiPROT001426	Ai02g2176,Ai02g5953
AiPROT001428	Ai02g2181,Ai02g2426
AiPROT001430	Ai02g2183,Ai02g32760
AiPROT001432	Ai02g2189,Ai02g2873
AiPROT001433	Ai02g2193,Ai02g16584
AiPROT001438	Ai02g2199,Ai02g31461
AiPROT001440	Ai02g2203,Ai02g2204
AiPROT001453	Ai02g2224,Ai02g29212,Ai02g29243,Ai02g17458
AiPROT001454	Ai02g2225,Ai02g14562
AiPROT001457	Ai02g2233,Ai02g26020
AiPROT001458	Ai02g2235,Ai02g22460
AiPROT001459	Ai02g2236,Ai02g25794
AiPROT001461	Ai02g2243,Ai02g6191
AiPROT001463	Ai02g2245,Ai02g35156
AiPROT001464	Ai02g2248,Ai02g29023,Ai02g27170
AiPROT001468	Ai02g2258,Ai02g31218
AiPROT001472	Ai02g2264,Ai02g27600
AiPROT001474	Ai02g2266,Ai02g12286
AiPROT001475	Ai02g2268,Ai02g31440
AiPROT001476	Ai02g2269,Ai02g2634
AiPROT001477	Ai02g2271,Ai02g3646
AiPROT001478	Ai02g2272,Ai02g35971
AiPROT001479	Ai02g2277,Ai02g34967,Ai02g31360
AiPROT001483	Ai02g2285,Ai02g29080
AiPROT001487	Ai02g2289,Ai02g13861
AiPROT001489	Ai02g2295,Ai02g34530
AiPROT001503	Ai02g2315,Ai02g5170
AiPROT001504	Ai02g2316,Ai02g3927
AiPROT001507	Ai02g2320,Ai02g13163
AiPROT001508	Ai02g2321,Ai02g27228
AiPROT001509	Ai02g2322,Ai02g19954
AiPROT001510	Ai02g2323,Ai02g31123
AiPROT001511	Ai02g2326,Ai02g2954,Ai02g14003
AiPROT001512	Ai02g2328,Ai02g28950
AiPROT001514	Ai02g2333,Ai02g2438
AiPROT001517	Ai02g2340,Ai02g4901
AiPROT001519	Ai02g2342,Ai02g29708
AiPROT001522	Ai02g2346,Ai02g4810
AiPROT001523	Ai02g2347,Ai02g13797
AiPROT001525	Ai02g2351,Ai02g9281
AiPROT001528	Ai02g2360,Ai02g25484
AiPROT001530	Ai02g2364,Ai02g26461
AiPROT001531	Ai02g2366,Ai02g26314
AiPROT001532	Ai02g2367,Ai02g29351
AiPROT001547	Ai02g2391,Ai02g20340
AiPROT001548	Ai02g2393,Ai02g2394
AiPROT001555	Ai02g2406,Ai02g13018
AiPROT001566	Ai02g2427,Ai02g26203
AiPROT001572	Ai02g2437,Ai02g15333
AiPROT001577	Ai02g2443,Ai02g26668
AiPROT001579	Ai02g2446,Ai02g28991
AiPROT001580	Ai02g2447,Ai02g28961
AiPROT001581	Ai02g2451,Ai02g17678
AiPROT001582	Ai02g2453,Ai02g16419
AiPROT001587	Ai02g2459,Ai02g16143
AiPROT001590	Ai02g2466,Ai02g32469
AiPROT001591	Ai02g2468,Ai02g3180
AiPROT001603	Ai02g2484,Ai02g2485
AiPROT001604	Ai02g2486,Ai02g26128
AiPROT001607	Ai02g2491,Ai02g3523
AiPROT001608	Ai02g2493,Ai02g2872,Ai02g9091
AiPROT001609	Ai02g2495,Ai02g26217
AiPROT001614	Ai02g2503,Ai02g11428
AiPROT001615	Ai02g2505,Ai02g21461
AiPROT001616	Ai02g2507,Ai02g20196,Ai02g20198,Ai02g5314
AiPROT001620	Ai02g2514,Ai02g30875
AiPROT001623	Ai02g2524,Ai02g13811
AiPROT001625	Ai02g2526,Ai02g22681
AiPROT001628	Ai02g2529,Ai02g31814
AiPROT001630	Ai02g2535,Ai02g4541
AiPROT001637	Ai02g2545,Ai02g32805
AiPROT001643	Ai02g2553,Ai02g30063,Ai02g21957
AiPROT001644	Ai02g2555,Ai02g2558,Ai02g2556
AiPROT001652	Ai02g2574,Ai02g15100
AiPROT001653	Ai02g2575,Ai02g29764,Ai02g29585
AiPROT001655	Ai02g2578,Ai02g6605
AiPROT001658	Ai02g2583,Ai02g12938
AiPROT001659	Ai02g2585,Ai02g28966
AiPROT001661	Ai02g2589,Ai02g17691
AiPROT001670	Ai02g2606,Ai02g15311
AiPROT001672	Ai02g2611,Ai02g29413
AiPROT001675	Ai02g2615,Ai02g19161
AiPROT001678	Ai02g2619,Ai02g5009
AiPROT001681	Ai02g2624,Ai02g5487
AiPROT001682	Ai02g2625,Ai02g24235,Ai02g24234
AiPROT001688	Ai02g2631,Ai02g44090,Ai02g17490,Ai02g5312
AiPROT001695	Ai02g2642,Ai02g26960
AiPROT001696	Ai02g2643,Ai02g29568
AiPROT001703	Ai02g2651,Ai02g16719
AiPROT001706	Ai02g2658,Ai02g11372
AiPROT001707	Ai02g2661,Ai02g18470
AiPROT001710	Ai02g2668,Ai02g30278
AiPROT001711	Ai02g2670,Ai02g31770
AiPROT001716	Ai02g2676,Ai02g4834
AiPROT001717	Ai02g2677,Ai02g23833
AiPROT001718	Ai02g2679,Ai02g9262,Ai02g3291
AiPROT001730	Ai02g2698,Ai02g18117
AiPROT001732	Ai02g2701,Ai02g34052
AiPROT001733	Ai02g2702,Ai02g3950
AiPROT001734	Ai02g2703,Ai02g19879
AiPROT001739	Ai02g2715,Ai02g33598
AiPROT001740	Ai02g2719,Ai02g31909
AiPROT001746	Ai02g2728,Ai02g26249
AiPROT001749	Ai02g2731,Ai02g30399
AiPROT001750	Ai02g2733,Ai02g19065
AiPROT001751	Ai02g2734,Ai02g28174
AiPROT001752	Ai02g2736,Ai02g31285
AiPROT001755	Ai02g2740,Ai02g31054
AiPROT001758	Ai02g2743,Ai02g31864
AiPROT001759	Ai02g2745,Ai02g5376
AiPROT001762	Ai02g2748,Ai02g29953
AiPROT001763	Ai02g2750,Ai02g27336
AiPROT001771	Ai02g2761,Ai02g29087,Ai02g8739
AiPROT001773	Ai02g2765,Ai02g12965,Ai02g10096
AiPROT001774	Ai02g2771,Ai02g6287
AiPROT001776	Ai02g2776,Ai02g24928
AiPROT001777	Ai02g2780,Ai02g22923
AiPROT001779	Ai02g2783,Ai02g30327
AiPROT001780	Ai02g2784,Ai02g30568
AiPROT001781	Ai02g2785,Ai02g30456
AiPROT001788	Ai02g2803,Ai02g5114
AiPROT001790	Ai02g2810,Ai02g29634
AiPROT001796	Ai02g2816,Ai02g10697
AiPROT001802	Ai02g2823,Ai02g6456
AiPROT001803	Ai02g2824,Ai02g26124
AiPROT001806	Ai02g2827,Ai02g23382
AiPROT001807	Ai02g2828,Ai02g21586
AiPROT001812	Ai02g2835,Ai02g33907
AiPROT001814	Ai02g2837,Ai02g8135
AiPROT001822	Ai02g2850,Ai02g11597
AiPROT001823	Ai02g2853,Ai02g21301
AiPROT001828	Ai02g2858,Ai02g29380
AiPROT001829	Ai02g2860,Ai02g20342
AiPROT001835	Ai02g2869,Ai02g21071
AiPROT001837	Ai02g2875,Ai02g12383
AiPROT001838	Ai02g2878,Ai02g26512
AiPROT001839	Ai02g2879,Ai02g31308
AiPROT001840	Ai02g2883,Ai02g29763
AiPROT001841	Ai02g2884,Ai02g5423,Ai02g13289
AiPROT001843	Ai02g2888,Ai02g35639
AiPROT001854	Ai02g2906,Ai02g14853
AiPROT001855	Ai02g2907,Ai02g14854
AiPROT001856	Ai02g2908,Ai02g20200
AiPROT001857	Ai02g2910,Ai02g34077
AiPROT001858	Ai02g2911,Ai02g22368,Ai02g7474
AiPROT001863	Ai02g2920,Ai02g32109
AiPROT001864	Ai02g2921,Ai02g9046
AiPROT001866	Ai02g2923,Ai02g29317
AiPROT001867	Ai02g2925,Ai02g22921
AiPROT001868	Ai02g2926,Ai02g30226
AiPROT001871	Ai02g2933,Ai02g19933
AiPROT001874	Ai02g2936,Ai02g3232
AiPROT001877	Ai02g2939,Ai02g12746,Ai02g12745
AiPROT001879	Ai02g2942,Ai02g33925
AiPROT001886	Ai02g2955,Ai02g26831
AiPROT001892	Ai02g2963,Ai02g29569
AiPROT001896	Ai02g2972,Ai02g6317
AiPROT001897	Ai02g2974,Ai02g3729
AiPROT001903	Ai02g2980,Ai02g18488
AiPROT001905	Ai02g2984,Ai02g30970,Ai02g32085,Ai02g2988
AiPROT001906	Ai02g2985,Ai02g2987,Ai02g29814,Ai02g10312
AiPROT001917	Ai02g3004,Ai02g17546,Ai02g30670
AiPROT001936	Ai02g3030,Ai02g32686
AiPROT001939	Ai02g3033,Ai02g25115
AiPROT001940	Ai02g3034,Ai02g17242
AiPROT001944	Ai02g3042,Ai02g25832
AiPROT001947	Ai02g3045,Ai02g3046
AiPROT001951	Ai02g3061,Ai02g28979,Ai02g13790
AiPROT001957	Ai02g3072,Ai02g15043
AiPROT001962	Ai02g3080,Ai02g9397
AiPROT001967	Ai02g3087,Ai02g25835
AiPROT001970	Ai02g3090,Ai02g27403
AiPROT001976	Ai02g3096,Ai02g25202
AiPROT001985	Ai02g3111,Ai02g30516
AiPROT001986	Ai02g3115,Ai02g30113
AiPROT001990	Ai02g3123,Ai02g26690
AiPROT002003	Ai02g3148,Ai02g22584,Ai02g34664
AiPROT002004	Ai02g3149,Ai02g15911
AiPROT002006	Ai02g3151,Ai02g29952
AiPROT002007	Ai02g3153,Ai02g24841
AiPROT002009	Ai02g3156,Ai02g27243
AiPROT002011	Ai02g3161,Ai02g10949
AiPROT002020	Ai02g3173,Ai02g29039
AiPROT002030	Ai02g3193,Ai02g18608
AiPROT002031	Ai02g3194,Ai02g14273,Ai02g9898
AiPROT002033	Ai02g3197,Ai02g15643
AiPROT002035	Ai02g3202,Ai02g33016,Ai02g34339,Ai02g35022
AiPROT002036	Ai02g3207,Ai02g29556,Ai02g33901
AiPROT002044	Ai02g3218,Ai02g29293
AiPROT002049	Ai02g3225,Ai02g34194
AiPROT002050	Ai02g3226,Ai02g26984
AiPROT002055	Ai02g3233,Ai02g8991
AiPROT002057	Ai02g3236,Ai02g6349
AiPROT002060	Ai02g3241,Ai02g4256
AiPROT002061	Ai02g3242,Ai02g34518
AiPROT002067	Ai02g3249,Ai02g8935
AiPROT002068	Ai02g3251,Ai02g8937
AiPROT002073	Ai02g3261,Ai02g27563,Ai02g10601,Ai02g7964
AiPROT002075	Ai02g3263,Ai02g35091
AiPROT002081	Ai02g3275,Ai02g13606
AiPROT002085	Ai02g3282,Ai02g3532
AiPROT002091	Ai02g3293,Ai02g24627
AiPROT002092	Ai02g3294,Ai02g17518,Ai02g32980,Ai02g18996
AiPROT002099	Ai02g3301,Ai02g28422
AiPROT002100	Ai02g3302,Ai02g9809
AiPROT002111	Ai02g3321,Ai02g9630
AiPROT002124	Ai02g3338,Ai02g10563
AiPROT002125	Ai02g3343,Ai02g30096
AiPROT002134	Ai02g3353,Ai02g36386
AiPROT002135	Ai02g3354,Ai02g10771
AiPROT002138	Ai02g3360,Ai02g4099
AiPROT002139	Ai02g3361,Ai02g13799
AiPROT002140	Ai02g3363,Ai02g37590
AiPROT002145	Ai02g3375,Ai02g26113
AiPROT002148	Ai02g3378,Ai02g31830,Ai02g26433
AiPROT002153	Ai02g3386,Ai02g23123
AiPROT002157	Ai02g3391,Ai02g21220,Ai02g14058
AiPROT002163	Ai02g3397,Ai02g3675
AiPROT002165	Ai02g3400,Ai02g10148
AiPROT002173	Ai02g3410,Ai02g23221
AiPROT002177	Ai02g3414,Ai02g23863
AiPROT002178	Ai02g3415,Ai02g30485
AiPROT002179	Ai02g3417,Ai02g13337
AiPROT002180	Ai02g3418,Ai02g27561
AiPROT002183	Ai02g3421,Ai02g27197
AiPROT002187	Ai02g3426,Ai02g8734
AiPROT002188	Ai02g3427,Ai02g9853
AiPROT002190	Ai02g3431,Ai02g34149
AiPROT002194	Ai02g3438,Ai02g31482
AiPROT002202	Ai02g3450,Ai02g7330,Ai02g4751
AiPROT002208	Ai02g3458,Ai02g18554
AiPROT002209	Ai02g3460,Ai02g18720
AiPROT002210	Ai02g3461,Ai02g18541,Ai02g6481,Ai02g3462
AiPROT002211	Ai02g3463,Ai02g29766
AiPROT002212	Ai02g3464,Ai02g27983
AiPROT002215	Ai02g3468,Ai02g18995
AiPROT002218	Ai02g3473,Ai02g10290
AiPROT002220	Ai02g3476,Ai02g29110
AiPROT002230	Ai02g3486,Ai02g30468
AiPROT002231	Ai02g3487,Ai02g26129
AiPROT002235	Ai02g3493,Ai02g20863
AiPROT002237	Ai02g3497,Ai02g13832,Ai02g16606
AiPROT002240	Ai02g3502,Ai02g4724
AiPROT002245	Ai02g3509,Ai02g24724
AiPROT002246	Ai02g3510,Ai02g30959
AiPROT002247	Ai02g3512,Ai02g21624,Ai02g3513
AiPROT002250	Ai02g3516,Ai02g26576
AiPROT002256	Ai02g3524,Ai02g7718
AiPROT002257	Ai02g3525,Ai02g8975,Ai02g3527
AiPROT002258	Ai02g3526,Ai02g8976,Ai02g3528
AiPROT002264	Ai02g3535,Ai02g12688
AiPROT002269	Ai02g3542,Ai02g29375
AiPROT002270	Ai02g3543,Ai02g28548
AiPROT002275	Ai02g3550,Ai02g28061
AiPROT002277	Ai02g3552,Ai02g30626
AiPROT002278	Ai02g3554,Ai02g30393
AiPROT002279	Ai02g3555,Ai02g29415
AiPROT002289	Ai02g3574,Ai02g12427
AiPROT002290	Ai02g3575,Ai02g34460
AiPROT002294	Ai02g3580,Ai02g9318
AiPROT002295	Ai02g3582,Ai02g14041
AiPROT002300	Ai02g3589,Ai02g11229
AiPROT002313	Ai02g3609,Ai02g22953,Ai02g22404
AiPROT002321	Ai02g3619,Ai02g11693,Ai02g30258
AiPROT002323	Ai02g3623,Ai02g30751
AiPROT002324	Ai02g3626,Ai02g15983
AiPROT002326	Ai02g3630,Ai02g14178
AiPROT002327	Ai02g3632,Ai02g24447,Ai02g7688
AiPROT002330	Ai02g3636,Ai02g26605
AiPROT002333	Ai02g3642,Ai02g11804
AiPROT002334	Ai02g3643,Ai02g17028
AiPROT002339	Ai02g3652,Ai02g7817
AiPROT002341	Ai02g3655,Ai02g16667
AiPROT002342	Ai02g3656,Ai02g24247
AiPROT002346	Ai02g3660,Ai02g27116
AiPROT002361	Ai02g3685,Ai02g17000
AiPROT002367	Ai02g3691,Ai02g31486
AiPROT002369	Ai02g3694,Ai02g20562,Ai02g12328
AiPROT002370	Ai02g3695,Ai02g35231
AiPROT002372	Ai02g3701,Ai02g12945,Ai02g12944
AiPROT002375	Ai02g3704,Ai02g10693
AiPROT002377	Ai02g3707,Ai02g33655
AiPROT002380	Ai02g3713,Ai02g26055
AiPROT002387	Ai02g3721,Ai02g34875
AiPROT002389	Ai02g3724,Ai02g23743
AiPROT002396	Ai02g3734,Ai02g13224
AiPROT002397	Ai02g3735,Ai02g28108
AiPROT002402	Ai02g3741,Ai02g15746
AiPROT002403	Ai02g3742,Ai02g27796,Ai02g31514
AiPROT002404	Ai02g3745,Ai02g32354
AiPROT002405	Ai02g3747,Ai02g4848
AiPROT002411	Ai02g3754,Ai02g3755
AiPROT002412	Ai02g3756,Ai02g29946
AiPROT002417	Ai02g3763,Ai02g19117
AiPROT002428	Ai02g3778,Ai02g24734
AiPROT002430	Ai02g3780,Ai02g35033
AiPROT002431	Ai02g3782,Ai02g26516
AiPROT002432	Ai02g3784,Ai02g12898
AiPROT002436	Ai02g3791,Ai02g20956
AiPROT002438	Ai02g3793,Ai02g18704
AiPROT002443	Ai02g3799,Ai02g31485
AiPROT002446	Ai02g3802,Ai02g27087
AiPROT002447	Ai02g3803,Ai02g8403
AiPROT002449	Ai02g3805,Ai02g32620
AiPROT002453	Ai02g3809,Ai02g14892
AiPROT002455	Ai02g3811,Ai02g28031
AiPROT002458	Ai02g3815,Ai02g29361
AiPROT002462	Ai02g3819,Ai02g29478
AiPROT002465	Ai02g3822,Ai02g20749,Ai02g20522
AiPROT002471	Ai02g3829,Ai02g29355
AiPROT002473	Ai02g3832,Ai02g10031
AiPROT002479	Ai02g3841,Ai02g23452
AiPROT002480	Ai02g3842,Ai02g23450
AiPROT002482	Ai02g3844,Ai02g24007
AiPROT002485	Ai02g3848,Ai02g25754,Ai02g7824
AiPROT002488	Ai02g3854,Ai02g12303
AiPROT002490	Ai02g3856,Ai02g25009
AiPROT002491	Ai02g3857,Ai02g4228
AiPROT002493	Ai02g3859,Ai02g12270
AiPROT002504	Ai02g3872,Ai02g21315
AiPROT002508	Ai02g3879,Ai02g26718
AiPROT002511	Ai02g3883,Ai02g23521
AiPROT002513	Ai02g3885,Ai02g23523
AiPROT002518	Ai02g3894,Ai02g23219
AiPROT002525	Ai02g3903,Ai02g3904
AiPROT002529	Ai02g3916,Ai02g3917
AiPROT002531	Ai02g3919,Ai02g23577,Ai02g7906
AiPROT002535	Ai02g3923,Ai02g17782
AiPROT002541	Ai02g3932,Ai02g17287
AiPROT002545	Ai02g3944,Ai02g23201
AiPROT002547	Ai02g3953,Ai02g28640,Ai02g27220
AiPROT002548	Ai02g3955,Ai02g7207
AiPROT002551	Ai02g3958,Ai02g12317
AiPROT002552	Ai02g3959,Ai02g7649
AiPROT002554	Ai02g3962,Ai02g12958
AiPROT002557	Ai02g3967,Ai02g20968
AiPROT002566	Ai02g3979,Ai02g9750
AiPROT002572	Ai02g3988,Ai02g25047
AiPROT002580	Ai02g3998,Ai02g22961
AiPROT002582	Ai02g4003,Ai02g4004
AiPROT002583	Ai02g4005,Ai02g15854,Ai02g27058
AiPROT002589	Ai02g4013,Ai02g32460
AiPROT002590	Ai02g4016,Ai02g16106
AiPROT002591	Ai02g4018,Ai02g13769
AiPROT002592	Ai02g4019,Ai02g28313
AiPROT002599	Ai02g4026,Ai02g12968
AiPROT002600	Ai02g4027,Ai02g30299
AiPROT002601	Ai02g4030,Ai02g30130
AiPROT002608	Ai02g4040,Ai02g10897
AiPROT002609	Ai02g4041,Ai02g30707
AiPROT002613	Ai02g4046,Ai02g19349
AiPROT002615	Ai02g4049,Ai02g32662
AiPROT002617	Ai02g4053,Ai02g14400
AiPROT002618	Ai02g4054,Ai02g25294
AiPROT002625	Ai02g4070,Ai02g19082,Ai02g10583
AiPROT002633	Ai02g4080,Ai02g7416
AiPROT002635	Ai02g4082,Ai02g30081
AiPROT002636	Ai02g4083,Ai02g10234
AiPROT002641	Ai02g4101,Ai02g34169
AiPROT002645	Ai02g4106,Ai02g27297
AiPROT002649	Ai02g4110,Ai02g4111
AiPROT002651	Ai02g4114,Ai02g25338
AiPROT002658	Ai02g4123,Ai02g14046
AiPROT002662	Ai02g4128,Ai02g30932
AiPROT002671	Ai02g4140,Ai02g29469
AiPROT002678	Ai02g4149,Ai02g20567
AiPROT002679	Ai02g4150,Ai02g15823
AiPROT002681	Ai02g4155,Ai02g35299
AiPROT002691	Ai02g4175,Ai02g30148
AiPROT002692	Ai02g4176,Ai02g10281
AiPROT002700	Ai02g4186,Ai02g22693
AiPROT002701	Ai02g4187,Ai02g10748
AiPROT002704	Ai02g4190,Ai02g15608
AiPROT002706	Ai02g4192,Ai02g26969
AiPROT002712	Ai02g4206,Ai02g41791
AiPROT002713	Ai02g4208,Ai02g4413
AiPROT002716	Ai02g4213,Ai02g10197
AiPROT002718	Ai02g4216,Ai02g34283
AiPROT002720	Ai02g4218,Ai02g22256
AiPROT002723	Ai02g4226,Ai02g19233
AiPROT002726	Ai02g4235,Ai02g30206
AiPROT002727	Ai02g4236,Ai02g30829
AiPROT002728	Ai02g4237,Ai02g29224
AiPROT002732	Ai02g4241,Ai02g25288
AiPROT002734	Ai02g4246,Ai02g31276
AiPROT002735	Ai02g4249,Ai02g14778
AiPROT002736	Ai02g4252,Ai02g11018
AiPROT002744	Ai02g4265,Ai02g7515
AiPROT002745	Ai02g4266,Ai02g6361
AiPROT002748	Ai02g4272,Ai02g9579
AiPROT002751	Ai02g4275,Ai02g26359
AiPROT002755	Ai02g4282,Ai02g16545
AiPROT002757	Ai02g4284,Ai02g8749
AiPROT002758	Ai02g4285,Ai02g30771
AiPROT002761	Ai02g4295,Ai02g22467
AiPROT002763	Ai02g4298,Ai02g35084
AiPROT002768	Ai02g4305,Ai02g33995
AiPROT002770	Ai02g4307,Ai02g41328
AiPROT002771	Ai02g4310,Ai02g8988
AiPROT002772	Ai02g4311,Ai02g31384,Ai02g30410
AiPROT002774	Ai02g4314,Ai02g34193
AiPROT002780	Ai02g4322,Ai02g27784
AiPROT002782	Ai02g4325,Ai02g29944
AiPROT002785	Ai02g4328,Ai02g25943
AiPROT002787	Ai02g4333,Ai02g29058
AiPROT002788	Ai02g4334,Ai02g27105
AiPROT002798	Ai02g4350,Ai02g24790
AiPROT002799	Ai02g4351,Ai02g5717
AiPROT002804	Ai02g4359,Ai02g33438
AiPROT002809	Ai02g4366,Ai02g26401
AiPROT002810	Ai02g4367,Ai02g40294
AiPROT002816	Ai02g4376,Ai02g30331
AiPROT002825	Ai02g4391,Ai02g31083
AiPROT002826	Ai02g4392,Ai02g16447
AiPROT002829	Ai02g4396,Ai02g29451
AiPROT002831	Ai02g4398,Ai02g32199,Ai02g30906
AiPROT002834	Ai02g4402,Ai02g28684
AiPROT002836	Ai02g4405,Ai02g33852
AiPROT002837	Ai02g4406,Ai02g16676
AiPROT002838	Ai02g4408,Ai02g6222
AiPROT002844	Ai02g4418,Ai02g22106
AiPROT002847	Ai02g4422,Ai02g24830
AiPROT002850	Ai02g4425,Ai02g4566
AiPROT002855	Ai02g4431,Ai02g8709
AiPROT002862	Ai02g4439,Ai02g11817
AiPROT002868	Ai02g4447,Ai02g21124
AiPROT002870	Ai02g4450,Ai02g29769
AiPROT002872	Ai02g4454,Ai02g28102
AiPROT002873	Ai02g4455,Ai02g30897
AiPROT002874	Ai02g4456,Ai02g24178
AiPROT002885	Ai02g4471,Ai02g12866
AiPROT002886	Ai02g4472,Ai02g32114
AiPROT002894	Ai02g4484,Ai02g19305
AiPROT002896	Ai02g4486,Ai02g19312
AiPROT002899	Ai02g4489,Ai02g10284,Ai02g16454,Ai02g27159
AiPROT002900	Ai02g4490,Ai02g31646
AiPROT002901	Ai02g4491,Ai02g32936
AiPROT002908	Ai02g4498,Ai02g30110
AiPROT002912	Ai02g4505,Ai02g25261
AiPROT002919	Ai02g4515,Ai02g20446
AiPROT002926	Ai02g4525,Ai02g26713
AiPROT002932	Ai02g4531,Ai02g44433,Ai02g40127
AiPROT002934	Ai02g4533,Ai02g26487
AiPROT002937	Ai02g4538,Ai02g7873
AiPROT002938	Ai02g4542,Ai02g5125
AiPROT002939	Ai02g4543,Ai02g26658
AiPROT002942	Ai02g4546,Ai02g7637
AiPROT002943	Ai02g4547,Ai02g29323
AiPROT002944	Ai02g4549,Ai02g26289
AiPROT002945	Ai02g4552,Ai02g25421
AiPROT002949	Ai02g4557,Ai02g25270
AiPROT002952	Ai02g4561,Ai02g24863,Ai02g17013
AiPROT002954	Ai02g4568,Ai02g31621
AiPROT002959	Ai02g4575,Ai02g11927
AiPROT002962	Ai02g4581,Ai02g8150
AiPROT002963	Ai02g4582,Ai02g28414
AiPROT002965	Ai02g4585,Ai02g15024
AiPROT002966	Ai02g4587,Ai02g27855
AiPROT002968	Ai02g4590,Ai02g24126,Ai02g31195
AiPROT002969	Ai02g4591,Ai02g34754
AiPROT002970	Ai02g4592,Ai02g27166
AiPROT002977	Ai02g4600,Ai02g4710
AiPROT002978	Ai02g4601,Ai02g29912
AiPROT002979	Ai02g4603,Ai02g17095,Ai02g26836,Ai02g6635
AiPROT002980	Ai02g4605,Ai02g9120
AiPROT002985	Ai02g4613,Ai02g23934,Ai02g23933,Ai02g26902
AiPROT002986	Ai02g4614,Ai02g4615
AiPROT002987	Ai02g4616,Ai02g19033
AiPROT002990	Ai02g4620,Ai02g34570
AiPROT002997	Ai02g4634,Ai02g29405
AiPROT002998	Ai02g4635,Ai02g15733
AiPROT002999	Ai02g4637,Ai02g15035
AiPROT003000	Ai02g4638,Ai02g25760
AiPROT003002	Ai02g4645,Ai02g36826,Ai02g43350
AiPROT003005	Ai02g4650,Ai02g26030
AiPROT003011	Ai02g4665,Ai02g27272,Ai02g4666
AiPROT003014	Ai02g4670,Ai02g11196
AiPROT003033	Ai02g4696,Ai02g27913
AiPROT003034	Ai02g4697,Ai02g8841
AiPROT003036	Ai02g4699,Ai02g20810
AiPROT003037	Ai02g4701,Ai02g26453
AiPROT003042	Ai02g4708,Ai02g7799
AiPROT003051	Ai02g4720,Ai02g21905
AiPROT003052	Ai02g4722,Ai02g5994
AiPROT003053	Ai02g4723,Ai02g23724
AiPROT003057	Ai02g4729,Ai02g22583
AiPROT003062	Ai02g4742,Ai02g14415
AiPROT003063	Ai02g4743,Ai02g20283
AiPROT003064	Ai02g4744,Ai02g13368
AiPROT003065	Ai02g4745,Ai02g22249
AiPROT003066	Ai02g4747,Ai02g32843
AiPROT003070	Ai02g4755,Ai02g8477
AiPROT003077	Ai02g4764,Ai02g29050
AiPROT003079	Ai02g4766,Ai02g5135
AiPROT003085	Ai02g4772,Ai02g9566
AiPROT003086	Ai02g4774,Ai02g21912
AiPROT003088	Ai02g4776,Ai02g5363
AiPROT003090	Ai02g4778,Ai02g20967,Ai02g20790
AiPROT003092	Ai02g4780,Ai02g30579
AiPROT003093	Ai02g4783,Ai02g4784
AiPROT003094	Ai02g4786,Ai02g15724
AiPROT003101	Ai02g4797,Ai02g22075
AiPROT003107	Ai02g4807,Ai02g6981
AiPROT003110	Ai02g4811,Ai02g31691
AiPROT003111	Ai02g4814,Ai02g7517
AiPROT003114	Ai02g4819,Ai02g5330
AiPROT003123	Ai02g4830,Ai02g30854
AiPROT003127	Ai02g4838,Ai02g22850
AiPROT003128	Ai02g4844,Ai02g5648
AiPROT003130	Ai02g4849,Ai02g7871
AiPROT003132	Ai02g4851,Ai02g27567
AiPROT003137	Ai02g4856,Ai02g26728
AiPROT003140	Ai02g4861,Ai02g4862
AiPROT003150	Ai02g4876,Ai02g9922
AiPROT003151	Ai02g4878,Ai02g30591
AiPROT003156	Ai02g4885,Ai02g20400
AiPROT003158	Ai02g4887,Ai02g4888
AiPROT003159	Ai02g4889,Ai02g12985
AiPROT003162	Ai02g4892,Ai02g6394
AiPROT003164	Ai02g4895,Ai02g27273
AiPROT003166	Ai02g4898,Ai02g32286
AiPROT003171	Ai02g4909,Ai02g25493
AiPROT003172	Ai02g4911,Ai02g13663
AiPROT003173	Ai02g4912,Ai02g29646
AiPROT003174	Ai02g4913,Ai02g26274
AiPROT003176	Ai02g4918,Ai02g27150
AiPROT003177	Ai02g4919,Ai02g33924
AiPROT003180	Ai02g4922,Ai02g27290
AiPROT003184	Ai02g4929,Ai02g9942
AiPROT003190	Ai02g4935,Ai02g35202
AiPROT003193	Ai02g4939,Ai02g12933
AiPROT003195	Ai02g4941,Ai02g13448
AiPROT003203	Ai02g4953,Ai02g18025
AiPROT003208	Ai02g4958,Ai02g27610
AiPROT003212	Ai02g4963,Ai02g25200
AiPROT003217	Ai02g4969,Ai02g11382,Ai02g30563
AiPROT003218	Ai02g4970,Ai02g31775
AiPROT003219	Ai02g4973,Ai02g22755
AiPROT003228	Ai02g4984,Ai02g9614
AiPROT003231	Ai02g4991,Ai02g31180
AiPROT003232	Ai02g4992,Ai02g35304
AiPROT003236	Ai02g4997,Ai02g30933
AiPROT003239	Ai02g5000,Ai02g23328
AiPROT003242	Ai02g5005,Ai02g6148
AiPROT003243	Ai02g5007,Ai02g30178,Ai02g11669
AiPROT003245	Ai02g5011,Ai02g6539
AiPROT003248	Ai02g5014,Ai02g12202
AiPROT003250	Ai02g5017,Ai02g23308
AiPROT003251	Ai02g5018,Ai02g5343
AiPROT003252	Ai02g5023,Ai02g20913
AiPROT003254	Ai02g5025,Ai02g5026
AiPROT003256	Ai02g5029,Ai02g26818
AiPROT003258	Ai02g5031,Ai02g16751
AiPROT003262	Ai02g5037,Ai02g23912
AiPROT003263	Ai02g5039,Ai02g28517
AiPROT003264	Ai02g5041,Ai02g22099
AiPROT003265	Ai02g5044,Ai02g12567
AiPROT003269	Ai02g5051,Ai02g28224
AiPROT003274	Ai02g5056,Ai02g33560
AiPROT003284	Ai02g5071,Ai02g33602
AiPROT003289	Ai02g5076,Ai02g26926
AiPROT003291	Ai02g5078,Ai02g24948
AiPROT003292	Ai02g5079,Ai02g25453
AiPROT003304	Ai02g5093,Ai02g19574
AiPROT003305	Ai02g5094,Ai02g21360
AiPROT003306	Ai02g5095,Ai02g32100
AiPROT003307	Ai02g5096,Ai02g34368
AiPROT003311	Ai02g5101,Ai02g32962
AiPROT003312	Ai02g5104,Ai02g12208
AiPROT003313	Ai02g5110,Ai02g6496
AiPROT003315	Ai02g5112,Ai02g24872
AiPROT003316	Ai02g5115,Ai02g12606
AiPROT003317	Ai02g5116,Ai02g8907,Ai02g15761
AiPROT003318	Ai02g5117,Ai02g30846
AiPROT003323	Ai02g5127,Ai02g8889
AiPROT003331	Ai02g5141,Ai02g25579
AiPROT003336	Ai02g5147,Ai02g9308
AiPROT003337	Ai02g5148,Ai02g9190
AiPROT003340	Ai02g5154,Ai02g10969
AiPROT003341	Ai02g5156,Ai02g23033
AiPROT003343	Ai02g5159,Ai02g14739
AiPROT003347	Ai02g5163,Ai02g30507
AiPROT003355	Ai02g5172,Ai02g6679
AiPROT003356	Ai02g5174,Ai02g13256,Ai02g24296
AiPROT003366	Ai02g5192,Ai02g8529
AiPROT003369	Ai02g5197,Ai02g5555
AiPROT003370	Ai02g5199,Ai02g28220
AiPROT003374	Ai02g5203,Ai02g17828,Ai02g6125,Ai02g31544
AiPROT003376	Ai02g5205,Ai02g6126
AiPROT003377	Ai02g5210,Ai02g5211
AiPROT003378	Ai02g5212,Ai02g6402,Ai02g6401
AiPROT003380	Ai02g5215,Ai02g10860
AiPROT003382	Ai02g5217,Ai02g6042
AiPROT003384	Ai02g5222,Ai02g10832
AiPROT003385	Ai02g5224,Ai02g7297
AiPROT003390	Ai02g5229,Ai02g19546
AiPROT003391	Ai02g5230,Ai02g22970
AiPROT003401	Ai02g5240,Ai02g26283
AiPROT003409	Ai02g5250,Ai02g32414
AiPROT003410	Ai02g5251,Ai02g22818
AiPROT003411	Ai02g5252,Ai02g13525
AiPROT003413	Ai02g5256,Ai02g30550
AiPROT003414	Ai02g5257,Ai02g5889
AiPROT003420	Ai02g5264,Ai02g25947
AiPROT003421	Ai02g5266,Ai02g13755
AiPROT003436	Ai02g5288,Ai02g9856
AiPROT003437	Ai02g5289,Ai02g29344
AiPROT003438	Ai02g5292,Ai02g32961
AiPROT003440	Ai02g5296,Ai02g5297
AiPROT003443	Ai02g5310,Ai02g8276
AiPROT003444	Ai02g5311,Ai02g29620
AiPROT003451	Ai02g5322,Ai02g11702
AiPROT003452	Ai02g5323,Ai02g10403
AiPROT003453	Ai02g5324,Ai02g21310
AiPROT003462	Ai02g5336,Ai02g14101
AiPROT003466	Ai02g5342,Ai02g7429
AiPROT003476	Ai02g5355,Ai02g13524
AiPROT003483	Ai02g5367,Ai02g26821
AiPROT003484	Ai02g5370,Ai02g35147,Ai02g17991
AiPROT003503	Ai02g5402,Ai02g31902
AiPROT003505	Ai02g5405,Ai02g35386
AiPROT003507	Ai02g5407,Ai02g26160
AiPROT003509	Ai02g5411,Ai02g11134
AiPROT003511	Ai02g5413,Ai02g15859
AiPROT003512	Ai02g5414,Ai02g30979
AiPROT003515	Ai02g5420,Ai02g17472
AiPROT003524	Ai02g5436,Ai02g24096
AiPROT003529	Ai02g5444,Ai02g25756
AiPROT003530	Ai02g5445,Ai02g13578
AiPROT003533	Ai02g5452,Ai02g31057
AiPROT003540	Ai02g5462,Ai02g27512
AiPROT003541	Ai02g5464,Ai02g32388
AiPROT003542	Ai02g5466,Ai02g31564
AiPROT003546	Ai02g5473,Ai02g35053
AiPROT003559	Ai02g5490,Ai02g5491
AiPROT003562	Ai02g5496,Ai02g25590
AiPROT003563	Ai02g5497,Ai02g14282
AiPROT003565	Ai02g5500,Ai02g31944
AiPROT003567	Ai02g5503,Ai02g7462
AiPROT003572	Ai02g5514,Ai02g25942
AiPROT003575	Ai02g5520,Ai02g15833
AiPROT003576	Ai02g5521,Ai02g16211
AiPROT003578	Ai02g5523,Ai02g6465
AiPROT003581	Ai02g5526,Ai02g11314
AiPROT003592	Ai02g5543,Ai02g19405
AiPROT003596	Ai02g5551,Ai02g26537
AiPROT003597	Ai02g5552,Ai02g26290
AiPROT003605	Ai02g5564,Ai02g35281
AiPROT003607	Ai02g5568,Ai02g26556
AiPROT003608	Ai02g5569,Ai02g27032
AiPROT003611	Ai02g5576,Ai02g27277
AiPROT003612	Ai02g5577,Ai02g14258
AiPROT003613	Ai02g5578,Ai02g24575
AiPROT003614	Ai02g5579,Ai02g31175
AiPROT003622	Ai02g5591,Ai02g18435
AiPROT003633	Ai02g5608,Ai02g20726
AiPROT003634	Ai02g5611,Ai02g31394
AiPROT003641	Ai02g5623,Ai02g5624
AiPROT003646	Ai02g5631,Ai02g10839
AiPROT003647	Ai02g5632,Ai02g15630
AiPROT003649	Ai02g5635,Ai02g19833
AiPROT003658	Ai02g5647,Ai02g11077
AiPROT003664	Ai02g5655,Ai02g26507,Ai02g17249
AiPROT003673	Ai02g5665,Ai02g6557
AiPROT003676	Ai02g5669,Ai02g34216
AiPROT003678	Ai02g5672,Ai02g19444
AiPROT003687	Ai02g5686,Ai02g39568
AiPROT003689	Ai02g5689,Ai02g9575
AiPROT003691	Ai02g5691,Ai02g13426
AiPROT003695	Ai02g5695,Ai02g24676
AiPROT003696	Ai02g5696,Ai02g19886
AiPROT003701	Ai02g5703,Ai02g7773
AiPROT003704	Ai02g5707,Ai02g29150
AiPROT003708	Ai02g5715,Ai02g29288
AiPROT003710	Ai02g5718,Ai02g18370
AiPROT003711	Ai02g5719,Ai02g32069
AiPROT003713	Ai02g5722,Ai02g27770
AiPROT003731	Ai02g5748,Ai02g29123
AiPROT003732	Ai02g5750,Ai02g18285
AiPROT003734	Ai02g5753,Ai02g17956
AiPROT003744	Ai02g5771,Ai02g18721
AiPROT003745	Ai02g5773,Ai02g8442
AiPROT003747	Ai02g5776,Ai02g29159
AiPROT003748	Ai02g5778,Ai02g32372
AiPROT003754	Ai02g5785,Ai02g19341
AiPROT003755	Ai02g5787,Ai02g27364
AiPROT003757	Ai02g5789,Ai02g24547
AiPROT003758	Ai02g5790,Ai02g9036
AiPROT003760	Ai02g5792,Ai02g35318
AiPROT003762	Ai02g5796,Ai02g16512
AiPROT003763	Ai02g5797,Ai02g29562
AiPROT003765	Ai02g5801,Ai02g14809
AiPROT003766	Ai02g5803,Ai02g27331
AiPROT003767	Ai02g5805,Ai02g31846
AiPROT003773	Ai02g5811,Ai02g32634
AiPROT003775	Ai02g5814,Ai02g14533,Ai02g8825
AiPROT003776	Ai02g5815,Ai02g27339
AiPROT003777	Ai02g5816,Ai02g27340
AiPROT003780	Ai02g5819,Ai02g29202
AiPROT003782	Ai02g5822,Ai02g8398
AiPROT003783	Ai02g5824,Ai02g5825
AiPROT003794	Ai02g5840,Ai02g7710
AiPROT003808	Ai02g5867,Ai02g29633
AiPROT003811	Ai02g5872,Ai02g34881
AiPROT003818	Ai02g5879,Ai02g10040
AiPROT003821	Ai02g5884,Ai02g18820
AiPROT003823	Ai02g5887,Ai02g20714
AiPROT003826	Ai02g5892,Ai02g7331
AiPROT003827	Ai02g5895,Ai02g27676
AiPROT003829	Ai02g5898,Ai02g25220
AiPROT003834	Ai02g5906,Ai02g30297,Ai02g28428
AiPROT003835	Ai02g5910,Ai02g5918,Ai02g5916
AiPROT003836	Ai02g5911,Ai02g5917
AiPROT003837	Ai02g5912,Ai02g26372
AiPROT003843	Ai02g5927,Ai02g5928,Ai02g22033
AiPROT003844	Ai02g5929,Ai02g8615
AiPROT003846	Ai02g5932,Ai02g30808
AiPROT003854	Ai02g5944,Ai02g31645
AiPROT003856	Ai02g5948,Ai02g12224
AiPROT003865	Ai02g5958,Ai02g33672
AiPROT003867	Ai02g5963,Ai02g33073
AiPROT003870	Ai02g5967,Ai02g34942
AiPROT003874	Ai02g5975,Ai02g25811,Ai02g8772
AiPROT003875	Ai02g5976,Ai02g12571
AiPROT003878	Ai02g5981,Ai02g10801
AiPROT003881	Ai02g5985,Ai02g10797
AiPROT003883	Ai02g5988,Ai02g29356
AiPROT003884	Ai02g5989,Ai02g30971
AiPROT003885	Ai02g5991,Ai02g24376
AiPROT003888	Ai02g5999,Ai02g6143
AiPROT003891	Ai02g6003,Ai02g12228
AiPROT003895	Ai02g6007,Ai02g14615,Ai02g29566
AiPROT003896	Ai02g6008,Ai02g17112
AiPROT003897	Ai02g6009,Ai02g40022
AiPROT003899	Ai02g6011,Ai02g15766,Ai02g31401,Ai02g40827
AiPROT003902	Ai02g6015,Ai02g33786,Ai02g6016
AiPROT003904	Ai02g6018,Ai02g6536
AiPROT003905	Ai02g6019,Ai02g32334
AiPROT003912	Ai02g6026,Ai02g25531
AiPROT003913	Ai02g6027,Ai02g18688
AiPROT003916	Ai02g6030,Ai02g29656
AiPROT003926	Ai02g6045,Ai02g32346
AiPROT003927	Ai02g6046,Ai02g43102
AiPROT003934	Ai02g6056,Ai02g13081
AiPROT003936	Ai02g6058,Ai02g24737
AiPROT003937	Ai02g6060,Ai02g15767
AiPROT003941	Ai02g6066,Ai02g34741,Ai02g30840
AiPROT003942	Ai02g6068,Ai02g17748,Ai02g17747
AiPROT003943	Ai02g6069,Ai02g16723
AiPROT003944	Ai02g6070,Ai02g18346
AiPROT003956	Ai02g6084,Ai02g22582,Ai02g30174,Ai02g17523,Ai02g11852,Ai02g31649
AiPROT003958	Ai02g6087,Ai02g16935,Ai02g6885
AiPROT003961	Ai02g6093,Ai02g23081,Ai02g31015,Ai02g6094
AiPROT003966	Ai02g6106,Ai02g29681
AiPROT003967	Ai02g6107,Ai02g12482
AiPROT003968	Ai02g6108,Ai02g22851
AiPROT003970	Ai02g6110,Ai02g29200
AiPROT003975	Ai02g6116,Ai02g22996
AiPROT003977	Ai02g6119,Ai02g15612
AiPROT003980	Ai02g6122,Ai02g29168
AiPROT003981	Ai02g6124,Ai02g17826
AiPROT003982	Ai02g6127,Ai02g13549
AiPROT003985	Ai02g6132,Ai02g29677,Ai02g6133
AiPROT003988	Ai02g6138,Ai02g27598
AiPROT003989	Ai02g6142,Ai02g32946
AiPROT003991	Ai02g6145,Ai02g19774
AiPROT004002	Ai02g6162,Ai02g18787,Ai02g12818
AiPROT004003	Ai02g6163,Ai02g34905
AiPROT004004	Ai02g6165,Ai02g9533
AiPROT004005	Ai02g6167,Ai02g28287
AiPROT004007	Ai02g6179,Ai02g29676
AiPROT004010	Ai02g6184,Ai02g30786
AiPROT004011	Ai02g6185,Ai02g27515
AiPROT004012	Ai02g6186,Ai02g18432
AiPROT004013	Ai02g6187,Ai02g21100
AiPROT004015	Ai02g6189,Ai02g27344
AiPROT004021	Ai02g6197,Ai02g8677
AiPROT004024	Ai02g6200,Ai02g34836
AiPROT004027	Ai02g6209,Ai02g16039
AiPROT004028	Ai02g6210,Ai02g7464
AiPROT004030	Ai02g6216,Ai02g26358
AiPROT004034	Ai02g6225,Ai02g28604
AiPROT004044	Ai02g6240,Ai02g28745
AiPROT004053	Ai02g6250,Ai02g7534
AiPROT004055	Ai02g6253,Ai02g34842
AiPROT004067	Ai02g6269,Ai02g19379
AiPROT004068	Ai02g6271,Ai02g30556
AiPROT004069	Ai02g6272,Ai02g21769
AiPROT004085	Ai02g6295,Ai02g25921
AiPROT004096	Ai02g6312,Ai02g14984
AiPROT004101	Ai02g6318,Ai02g27568
AiPROT004103	Ai02g6321,Ai02g9734
AiPROT004104	Ai02g6322,Ai02g12941,Ai02g7436,Ai02g23489
AiPROT004105	Ai02g6324,Ai02g32255
AiPROT004108	Ai02g6328,Ai02g22431
AiPROT004110	Ai02g6330,Ai02g22352
AiPROT004123	Ai02g6346,Ai02g21070
AiPROT004136	Ai02g6367,Ai02g28250
AiPROT004141	Ai02g6374,Ai02g18642
AiPROT004145	Ai02g6378,Ai02g29223
AiPROT004146	Ai02g6379,Ai02g16074
AiPROT004148	Ai02g6382,Ai02g8803
AiPROT004154	Ai02g6390,Ai02g11011
AiPROT004157	Ai02g6395,Ai02g23214,Ai02g21473,Ai02g21183,Ai02g16401,Ai02g12984
AiPROT004161	Ai02g6404,Ai02g31754
AiPROT004162	Ai02g6407,Ai02g17963
AiPROT004165	Ai02g6414,Ai02g10474
AiPROT004166	Ai02g6415,Ai02g26409
AiPROT004170	Ai02g6425,Ai02g6826
AiPROT004171	Ai02g6428,Ai02g20952,Ai02g20951,Ai02g19071
AiPROT004173	Ai02g6431,Ai02g13378
AiPROT004175	Ai02g6433,Ai02g22284,Ai02g9976
AiPROT004178	Ai02g6436,Ai02g8238
AiPROT004180	Ai02g6438,Ai02g26137
AiPROT004185	Ai02g6447,Ai02g27422
AiPROT004190	Ai02g6452,Ai02g26076
AiPROT004191	Ai02g6453,Ai02g34332,Ai02g29574
AiPROT004192	Ai02g6454,Ai02g26945
AiPROT004194	Ai02g6458,Ai02g8762
AiPROT004199	Ai02g6466,Ai02g26170
AiPROT004205	Ai02g6473,Ai02g21786
AiPROT004208	Ai02g6480,Ai02g18544,Ai02g26058
AiPROT004213	Ai02g6486,Ai02g16654
AiPROT004216	Ai02g6489,Ai02g6490
AiPROT004218	Ai02g6493,Ai02g32510
AiPROT004219	Ai02g6494,Ai02g21386
AiPROT004221	Ai02g6497,Ai02g12543
AiPROT004222	Ai02g6499,Ai02g9416
AiPROT004226	Ai02g6505,Ai02g30447
AiPROT004227	Ai02g6506,Ai02g7780
AiPROT004230	Ai02g6510,Ai02g28743
AiPROT004234	Ai02g6514,Ai02g30794
AiPROT004236	Ai02g6516,Ai02g25656,Ai02g12300
AiPROT004241	Ai02g6521,Ai02g20930
AiPROT004245	Ai02g6527,Ai02g27503
AiPROT004246	Ai02g6528,Ai02g31868,Ai02g12336,Ai02g12334,Ai02g6529
AiPROT004248	Ai02g6531,Ai02g6533
AiPROT004252	Ai02g6538,Ai02g25983
AiPROT004263	Ai02g6550,Ai02g35040
AiPROT004266	Ai02g6560,Ai02g10445
AiPROT004276	Ai02g6577,Ai02g16876
AiPROT004279	Ai02g6584,Ai02g8737
AiPROT004280	Ai02g6585,Ai02g33340
AiPROT004281	Ai02g6586,Ai02g27069
AiPROT004282	Ai02g6587,Ai02g20352,Ai02g12604
AiPROT004283	Ai02g6588,Ai02g34613
AiPROT004286	Ai02g6594,Ai02g22497
AiPROT004290	Ai02g6599,Ai02g30662
AiPROT004293	Ai02g6607,Ai02g9161,Ai02g32428
AiPROT004298	Ai02g6616,Ai02g9264
AiPROT004299	Ai02g6617,Ai02g31708
AiPROT004313	Ai02g6637,Ai02g18413
AiPROT004320	Ai02g6650,Ai02g7367
AiPROT004322	Ai02g6652,Ai02g24279
AiPROT004323	Ai02g6653,Ai02g23495
AiPROT004325	Ai02g6655,Ai02g29197
AiPROT004327	Ai02g6658,Ai02g11889
AiPROT004330	Ai02g6664,Ai02g12494
AiPROT004341	Ai02g6678,Ai02g21348
AiPROT004343	Ai02g6682,Ai02g7174
AiPROT004349	Ai02g6694,Ai02g28616
AiPROT004355	Ai02g6703,Ai02g27601
AiPROT004360	Ai02g6710,Ai02g14213
AiPROT004362	Ai02g6713,Ai02g26905
AiPROT004363	Ai02g6717,Ai02g28030
AiPROT004369	Ai02g6724,Ai02g12942
AiPROT004370	Ai02g6725,Ai02g22208
AiPROT004375	Ai02g6731,Ai02g33758
AiPROT004376	Ai02g6732,Ai02g10743
AiPROT004389	Ai02g6749,Ai02g31412
AiPROT004392	Ai02g6752,Ai02g21664
AiPROT004393	Ai02g6754,Ai02g11324
AiPROT004395	Ai02g6756,Ai02g30538
AiPROT004397	Ai02g6758,Ai02g11623
AiPROT004404	Ai02g6768,Ai02g17430,Ai02g34873
AiPROT004407	Ai02g6771,Ai02g9878
AiPROT004408	Ai02g6776,Ai02g19400
AiPROT004419	Ai02g6791,Ai02g27572
AiPROT004425	Ai02g6798,Ai02g12114
AiPROT004426	Ai02g6799,Ai02g29889
AiPROT004429	Ai02g6803,Ai02g36797
AiPROT004435	Ai02g6812,Ai02g15332
AiPROT004436	Ai02g6813,Ai02g10600
AiPROT004446	Ai02g6824,Ai02g27378
AiPROT004449	Ai02g6831,Ai02g31339
AiPROT004452	Ai02g6834,Ai02g20970
AiPROT004456	Ai02g6846,Ai02g22590
AiPROT004457	Ai02g6847,Ai02g30581
AiPROT004458	Ai02g6849,Ai02g7413
AiPROT004459	Ai02g6851,Ai02g17976
AiPROT004466	Ai02g6862,Ai02g32260
AiPROT004470	Ai02g6868,Ai02g23922
AiPROT004481	Ai02g6879,Ai02g16258
AiPROT004484	Ai02g6883,Ai02g24263
AiPROT004485	Ai02g6884,Ai02g17222
AiPROT004486	Ai02g6887,Ai02g18212
AiPROT004488	Ai02g6889,Ai02g11300,Ai02g29949
AiPROT004489	Ai02g6890,Ai02g33591
AiPROT004495	Ai02g6898,Ai02g35134
AiPROT004496	Ai02g6899,Ai02g8998
AiPROT004498	Ai02g6904,Ai02g23362
AiPROT004500	Ai02g6906,Ai02g22290
AiPROT004506	Ai02g6915,Ai02g30606
AiPROT004510	Ai02g6922,Ai02g27735
AiPROT004511	Ai02g6923,Ai02g23344
AiPROT004516	Ai02g6930,Ai02g29613
AiPROT004517	Ai02g6931,Ai02g28199
AiPROT004518	Ai02g6932,Ai02g28699
AiPROT004519	Ai02g6933,Ai02g27480
AiPROT004525	Ai02g6942,Ai02g7374
AiPROT004527	Ai02g6945,Ai02g29475
AiPROT004534	Ai02g6954,Ai02g16869
AiPROT004536	Ai02g6956,Ai02g18672
AiPROT004537	Ai02g6958,Ai02g15306
AiPROT004540	Ai02g6962,Ai02g39774
AiPROT004547	Ai02g6978,Ai02g31549
AiPROT004556	Ai02g6989,Ai02g23568
AiPROT004557	Ai02g6990,Ai02g7358
AiPROT004561	Ai02g6994,Ai02g29278
AiPROT004566	Ai02g7003,Ai02g17770,Ai02g30418,Ai02g19636,Ai02g11075
AiPROT004574	Ai02g7014,Ai02g8718
AiPROT004577	Ai02g7018,Ai02g7703
AiPROT004579	Ai02g7020,Ai02g7021
AiPROT004581	Ai02g7025,Ai02g34214
AiPROT004582	Ai02g7026,Ai02g7027
AiPROT004585	Ai02g7030,Ai02g24913
AiPROT004586	Ai02g7031,Ai02g31040
AiPROT004588	Ai02g7033,Ai02g41484
AiPROT004589	Ai02g7034,Ai02g25214
AiPROT004593	Ai02g7039,Ai02g16680
AiPROT004597	Ai02g7044,Ai02g26074
AiPROT004599	Ai02g7046,Ai02g28448
AiPROT004604	Ai02g7054,Ai02g7055
AiPROT004609	Ai02g7061,Ai02g18737
AiPROT004610	Ai02g7063,Ai02g8756
AiPROT004622	Ai02g7077,Ai02g16347
AiPROT004623	Ai02g7079,Ai02g7080,Ai02g26786
AiPROT004625	Ai02g7085,Ai02g9114
AiPROT004627	Ai02g7090,Ai02g7091
AiPROT004628	Ai02g7094,Ai02g7095
AiPROT004630	Ai02g7098,Ai02g30625
AiPROT004638	Ai02g7112,Ai02g24551
AiPROT004639	Ai02g7114,Ai02g19146
AiPROT004643	Ai02g7118,Ai02g32681
AiPROT004647	Ai02g7122,Ai02g17368
AiPROT004658	Ai02g7134,Ai02g8174
AiPROT004664	Ai02g7140,Ai02g27295
AiPROT004672	Ai02g7150,Ai02g27186
AiPROT004676	Ai02g7159,Ai02g30945
AiPROT004677	Ai02g7160,Ai02g20700
AiPROT004679	Ai02g7162,Ai02g27214
AiPROT004684	Ai02g7169,Ai02g26666
AiPROT004685	Ai02g7170,Ai02g33546
AiPROT004691	Ai02g7183,Ai02g25642
AiPROT004695	Ai02g7190,Ai02g31287
AiPROT004710	Ai02g7213,Ai02g29090
AiPROT004721	Ai02g7226,Ai02g9582
AiPROT004727	Ai02g7232,Ai02g30128
AiPROT004730	Ai02g7237,Ai02g12199,Ai02g20315,Ai02g29575,Ai02g7238
AiPROT004733	Ai02g7241,Ai02g22337
AiPROT004736	Ai02g7245,Ai02g26378
AiPROT004739	Ai02g7249,Ai02g14407
AiPROT004748	Ai02g7261,Ai02g32162,Ai02g30903,Ai02g14358,Ai02g29180
AiPROT004751	Ai02g7271,Ai02g24451
AiPROT004752	Ai02g7273,Ai02g15367
AiPROT004761	Ai02g7288,Ai02g30099
AiPROT004768	Ai02g7305,Ai02g26970
AiPROT004771	Ai02g7308,Ai02g7309
AiPROT004773	Ai02g7312,Ai02g17705,Ai02g23560,Ai02g12951,Ai02g8823
AiPROT004777	Ai02g7318,Ai02g22420,Ai02g12753
AiPROT004778	Ai02g7320,Ai02g13656
AiPROT004779	Ai02g7322,Ai02g13654
AiPROT004780	Ai02g7323,Ai02g28534
AiPROT004781	Ai02g7325,Ai02g25098
AiPROT004784	Ai02g7333,Ai02g9766
AiPROT004786	Ai02g7335,Ai02g29187
AiPROT004787	Ai02g7337,Ai02g31837
AiPROT004788	Ai02g7338,Ai02g23736,Ai02g14104
AiPROT004789	Ai02g7340,Ai02g22917
AiPROT004790	Ai02g7341,Ai02g32454
AiPROT004791	Ai02g7342,Ai02g40979
AiPROT004793	Ai02g7344,Ai02g24667
AiPROT004794	Ai02g7347,Ai02g20977
AiPROT004801	Ai02g7355,Ai02g31327
AiPROT004803	Ai02g7360,Ai02g28363
AiPROT004809	Ai02g7366,Ai02g13303
AiPROT004811	Ai02g7370,Ai02g18278
AiPROT004812	Ai02g7371,Ai02g22852,Ai02g14083
AiPROT004813	Ai02g7372,Ai02g19849
AiPROT004814	Ai02g7375,Ai02g16752
AiPROT004823	Ai02g7385,Ai02g33333
AiPROT004824	Ai02g7387,Ai02g18379
AiPROT004831	Ai02g7396,Ai02g7397
AiPROT004836	Ai02g7403,Ai02g15389
AiPROT004840	Ai02g7407,Ai02g17649,Ai02g16932,Ai02g16933,Ai02g21911
AiPROT004841	Ai02g7411,Ai02g31496
AiPROT004842	Ai02g7412,Ai02g23938
AiPROT004843	Ai02g7415,Ai02g16213
AiPROT004850	Ai02g7428,Ai02g31398
AiPROT004851	Ai02g7430,Ai02g7431
AiPROT004854	Ai02g7441,Ai02g31807
AiPROT004863	Ai02g7452,Ai02g9221
AiPROT004875	Ai02g7476,Ai02g10490
AiPROT004876	Ai02g7477,Ai02g24300
AiPROT004885	Ai02g7494,Ai02g17132
AiPROT004887	Ai02g7501,Ai02g33894,Ai02g23954
AiPROT004888	Ai02g7502,Ai02g14163
AiPROT004890	Ai02g7505,Ai02g25752
AiPROT004891	Ai02g7506,Ai02g19078
AiPROT004893	Ai02g7512,Ai02g11156
AiPROT004894	Ai02g7516,Ai02g13017
AiPROT004896	Ai02g7521,Ai02g14814
AiPROT004904	Ai02g7535,Ai02g33846
AiPROT004905	Ai02g7537,Ai02g18222
AiPROT004906	Ai02g7541,Ai02g34001
AiPROT004908	Ai02g7544,Ai02g27057
AiPROT004911	Ai02g7549,Ai02g13381
AiPROT004913	Ai02g7552,Ai02g14330
AiPROT004916	Ai02g7556,Ai02g9513
AiPROT004918	Ai02g7558,Ai02g25777
AiPROT004927	Ai02g7569,Ai02g29651
AiPROT004930	Ai02g7572,Ai02g16503
AiPROT004936	Ai02g7579,Ai02g19474
AiPROT004938	Ai02g7583,Ai02g13932
AiPROT004939	Ai02g7584,Ai02g19999
AiPROT004942	Ai02g7587,Ai02g19548
AiPROT004943	Ai02g7592,Ai02g9168
AiPROT004946	Ai02g7598,Ai02g32170
AiPROT004952	Ai02g7604,Ai02g26808
AiPROT004958	Ai02g7621,Ai02g8612
AiPROT004964	Ai02g7634,Ai02g32629
AiPROT004966	Ai02g7638,Ai02g32532
AiPROT004967	Ai02g7639,Ai02g7640
AiPROT004968	Ai02g7641,Ai02g21466
AiPROT004973	Ai02g7650,Ai02g26787
AiPROT004979	Ai02g7658,Ai02g13038
AiPROT004981	Ai02g7660,Ai02g22617
AiPROT004988	Ai02g7668,Ai02g10878
AiPROT004989	Ai02g7672,Ai02g29803
AiPROT004992	Ai02g7675,Ai02g10390
AiPROT004994	Ai02g7680,Ai02g25508,Ai02g13366
AiPROT004998	Ai02g7684,Ai02g27573
AiPROT005000	Ai02g7689,Ai02g27012,Ai02g12758
AiPROT005006	Ai02g7697,Ai02g17062
AiPROT005010	Ai02g7705,Ai02g30799
AiPROT005012	Ai02g7707,Ai02g25728
AiPROT005013	Ai02g7709,Ai02g14720
AiPROT005015	Ai02g7713,Ai02g11445
AiPROT005016	Ai02g7714,Ai02g25869,Ai02g15417
AiPROT005017	Ai02g7715,Ai02g7716
AiPROT005018	Ai02g7722,Ai02g28658
AiPROT005020	Ai02g7727,Ai02g14823
AiPROT005021	Ai02g7728,Ai02g7732
AiPROT005022	Ai02g7729,Ai02g22543
AiPROT005028	Ai02g7741,Ai02g29891,Ai02g17966
AiPROT005029	Ai02g7742,Ai02g34827
AiPROT005040	Ai02g7756,Ai02g31069
AiPROT005042	Ai02g7758,Ai02g8199
AiPROT005044	Ai02g7760,Ai02g13410
AiPROT005050	Ai02g7772,Ai02g24030
AiPROT005053	Ai02g7778,Ai02g15227
AiPROT005054	Ai02g7779,Ai02g21550
AiPROT005064	Ai02g7793,Ai02g26740,Ai02g19966,Ai02g29135,Ai02g29061
AiPROT005069	Ai02g7800,Ai02g14151
AiPROT005070	Ai02g7802,Ai02g24540
AiPROT005077	Ai02g7826,Ai02g21988
AiPROT005089	Ai02g7844,Ai02g27052
AiPROT005090	Ai02g7845,Ai02g31796
AiPROT005095	Ai02g7850,Ai02g34400
AiPROT005097	Ai02g7854,Ai02g10668
AiPROT005111	Ai02g7870,Ai02g29504
AiPROT005112	Ai02g7872,Ai02g26607
AiPROT005118	Ai02g7879,Ai02g27172
AiPROT005120	Ai02g7881,Ai02g26553
AiPROT005122	Ai02g7883,Ai02g34479
AiPROT005124	Ai02g7885,Ai02g17085
AiPROT005127	Ai02g7888,Ai02g17538
AiPROT005128	Ai02g7889,Ai02g17536
AiPROT005129	Ai02g7890,Ai02g25903
AiPROT005130	Ai02g7891,Ai02g16773
AiPROT005131	Ai02g7892,Ai02g28564
AiPROT005135	Ai02g7899,Ai02g27135
AiPROT005144	Ai02g7912,Ai02g23839
AiPROT005145	Ai02g7913,Ai02g23840
AiPROT005149	Ai02g7917,Ai02g29921
AiPROT005150	Ai02g7918,Ai02g18125
AiPROT005154	Ai02g7923,Ai02g7924
AiPROT005158	Ai02g7930,Ai02g14128
AiPROT005162	Ai02g7937,Ai02g38570
AiPROT005166	Ai02g7947,Ai02g27492
AiPROT005167	Ai02g7950,Ai02g31253
AiPROT005170	Ai02g7960,Ai02g26971
AiPROT005171	Ai02g7968,Ai02g19169
AiPROT005179	Ai02g7981,Ai02g25274
AiPROT005189	Ai02g8000,Ai02g15232
AiPROT005193	Ai02g8004,Ai02g34251
AiPROT005214	Ai02g8035,Ai02g28278
AiPROT005218	Ai02g8045,Ai02g30639
AiPROT005220	Ai02g8048,Ai02g29283
AiPROT005228	Ai02g8057,Ai02g21093
AiPROT005229	Ai02g8059,Ai02g29743
AiPROT005251	Ai02g8092,Ai02g28776
AiPROT005258	Ai02g8104,Ai02g26978
AiPROT005261	Ai02g8108,Ai02g13385
AiPROT005264	Ai02g8116,Ai02g26001
AiPROT005267	Ai02g8126,Ai02g13686
AiPROT005273	Ai02g8136,Ai02g25951
AiPROT005275	Ai02g8138,Ai02g28652
AiPROT005278	Ai02g8141,Ai02g25805
AiPROT005284	Ai02g8154,Ai02g27450
AiPROT005287	Ai02g8158,Ai02g14281
AiPROT005289	Ai02g8161,Ai02g31288
AiPROT005298	Ai02g8171,Ai02g8172
AiPROT005308	Ai02g8187,Ai02g8188
AiPROT005311	Ai02g8192,Ai02g25925
AiPROT005313	Ai02g8194,Ai02g33297
AiPROT005314	Ai02g8195,Ai02g12041
AiPROT005319	Ai02g8201,Ai02g10981
AiPROT005320	Ai02g8203,Ai02g18276
AiPROT005324	Ai02g8212,Ai02g27334
AiPROT005326	Ai02g8214,Ai02g8215
AiPROT005328	Ai02g8217,Ai02g32307,Ai02g11836
AiPROT005329	Ai02g8218,Ai02g11835
AiPROT005335	Ai02g8227,Ai02g22043
AiPROT005336	Ai02g8228,Ai02g22488
AiPROT005337	Ai02g8229,Ai02g17629
AiPROT005340	Ai02g8232,Ai02g23055
AiPROT005345	Ai02g8240,Ai02g13835
AiPROT005347	Ai02g8242,Ai02g27524
AiPROT005352	Ai02g8249,Ai02g29696
AiPROT005354	Ai02g8251,Ai02g8253
AiPROT005356	Ai02g8256,Ai02g33531
AiPROT005359	Ai02g8261,Ai02g22209
AiPROT005360	Ai02g8263,Ai02g14094
AiPROT005361	Ai02g8264,Ai02g8853
AiPROT005367	Ai02g8271,Ai02g17063
AiPROT005370	Ai02g8275,Ai02g30031
AiPROT005381	Ai02g8289,Ai02g30679
AiPROT005382	Ai02g8291,Ai02g10624
AiPROT005388	Ai02g8301,Ai02g8302
AiPROT005393	Ai02g8308,Ai02g26893
AiPROT005395	Ai02g8310,Ai02g10117,Ai02g8311
AiPROT005397	Ai02g8315,Ai02g24728
AiPROT005402	Ai02g8328,Ai02g35109
AiPROT005403	Ai02g8329,Ai02g8330
AiPROT005404	Ai02g8331,Ai02g10912
AiPROT005408	Ai02g8338,Ai02g20246
AiPROT005424	Ai02g8368,Ai02g26360
AiPROT005427	Ai02g8372,Ai02g20997
AiPROT005431	Ai02g8379,Ai02g13187
AiPROT005436	Ai02g8386,Ai02g29588
AiPROT005437	Ai02g8388,Ai02g30302
AiPROT005440	Ai02g8391,Ai02g18155
AiPROT005442	Ai02g8393,Ai02g8394
AiPROT005445	Ai02g8399,Ai02g33707
AiPROT005447	Ai02g8401,Ai02g15972
AiPROT005449	Ai02g8404,Ai02g39475
AiPROT005454	Ai02g8414,Ai02g31340,Ai02g28540,Ai02g33456
AiPROT005464	Ai02g8425,Ai02g27018
AiPROT005469	Ai02g8432,Ai02g11983
AiPROT005475	Ai02g8439,Ai02g14521
AiPROT005487	Ai02g8456,Ai02g8457
AiPROT005488	Ai02g8458,Ai02g21960
AiPROT005490	Ai02g8460,Ai02g12236
AiPROT005499	Ai02g8469,Ai02g15051
AiPROT005511	Ai02g8482,Ai02g15537
AiPROT005512	Ai02g8484,Ai02g21147
AiPROT005514	Ai02g8486,Ai02g27416
AiPROT005516	Ai02g8488,Ai02g10152
AiPROT005520	Ai02g8493,Ai02g22564
AiPROT005527	Ai02g8502,Ai02g39575
AiPROT005528	Ai02g8503,Ai02g20203
AiPROT005529	Ai02g8505,Ai02g23696
AiPROT005532	Ai02g8512,Ai02g8944
AiPROT005539	Ai02g8522,Ai02g22482
AiPROT005540	Ai02g8523,Ai02g22481
AiPROT005542	Ai02g8525,Ai02g17163
AiPROT005543	Ai02g8526,Ai02g17160
AiPROT005560	Ai02g8548,Ai02g28233
AiPROT005565	Ai02g8554,Ai02g15738
AiPROT005567	Ai02g8560,Ai02g30746
AiPROT005568	Ai02g8563,Ai02g8564
AiPROT005581	Ai02g8579,Ai02g31075
AiPROT005582	Ai02g8582,Ai02g24432
AiPROT005586	Ai02g8586,Ai02g27099
AiPROT005589	Ai02g8589,Ai02g33974
AiPROT005597	Ai02g8601,Ai02g8602
AiPROT005598	Ai02g8603,Ai02g8605
AiPROT005600	Ai02g8608,Ai02g31146
AiPROT005601	Ai02g8610,Ai02g22128
AiPROT005603	Ai02g8616,Ai02g9941
AiPROT005615	Ai02g8638,Ai02g9321
AiPROT005617	Ai02g8640,Ai02g8644,Ai02g8641
AiPROT005618	Ai02g8643,Ai02g25614
AiPROT005626	Ai02g8655,Ai02g17906
AiPROT005628	Ai02g8657,Ai02g17908
AiPROT005631	Ai02g8660,Ai02g19278
AiPROT005632	Ai02g8664,Ai02g10579
AiPROT005633	Ai02g8670,Ai02g14345
AiPROT005634	Ai02g8673,Ai02g21577
AiPROT005636	Ai02g8675,Ai02g31400
AiPROT005640	Ai02g8682,Ai02g21652
AiPROT005651	Ai02g8696,Ai02g31251
AiPROT005660	Ai02g8708,Ai02g26627
AiPROT005673	Ai02g8741,Ai02g16627
AiPROT005674	Ai02g8745,Ai02g29977
AiPROT005678	Ai02g8751,Ai02g8880
AiPROT005679	Ai02g8753,Ai02g31377
AiPROT005685	Ai02g8764,Ai02g15772
AiPROT005687	Ai02g8766,Ai02g25434
AiPROT005688	Ai02g8769,Ai02g28100,Ai02g20270
AiPROT005690	Ai02g8771,Ai02g26467
AiPROT005691	Ai02g8774,Ai02g23896
AiPROT005692	Ai02g8775,Ai02g22550
AiPROT005696	Ai02g8780,Ai02g14239
AiPROT005698	Ai02g8782,Ai02g29229
AiPROT005699	Ai02g8788,Ai02g19022
AiPROT005700	Ai02g8789,Ai02g22780
AiPROT005707	Ai02g8796,Ai02g13225
AiPROT005710	Ai02g8800,Ai02g10259,Ai02g30927
AiPROT005716	Ai02g8811,Ai02g31843
AiPROT005717	Ai02g8813,Ai02g26748
AiPROT005722	Ai02g8818,Ai02g36881
AiPROT005724	Ai02g8820,Ai02g11175
AiPROT005731	Ai02g8830,Ai02g18336
AiPROT005732	Ai02g8831,Ai02g23692
AiPROT005733	Ai02g8832,Ai02g21788
AiPROT005740	Ai02g8843,Ai02g15555
AiPROT005741	Ai02g8844,Ai02g30915
AiPROT005743	Ai02g8847,Ai02g25615
AiPROT005748	Ai02g8854,Ai02g14664
AiPROT005749	Ai02g8855,Ai02g26247
AiPROT005761	Ai02g8870,Ai02g32718
AiPROT005765	Ai02g8876,Ai02g25831,Ai02g14637
AiPROT005768	Ai02g8879,Ai02g26136
AiPROT005769	Ai02g8881,Ai02g8882
AiPROT005770	Ai02g8883,Ai02g9273
AiPROT005775	Ai02g8891,Ai02g20267
AiPROT005779	Ai02g8898,Ai02g34220
AiPROT005781	Ai02g8903,Ai02g8904
AiPROT005785	Ai02g8911,Ai02g33144
AiPROT005786	Ai02g8912,Ai02g20897
AiPROT005787	Ai02g8914,Ai02g21768,Ai02g11936
AiPROT005788	Ai02g8915,Ai02g27783
AiPROT005789	Ai02g8916,Ai02g27285,Ai02g19747
AiPROT005797	Ai02g8927,Ai02g17278
AiPROT005814	Ai02g8956,Ai02g17562
AiPROT005823	Ai02g8967,Ai02g12184
AiPROT005826	Ai02g8971,Ai02g29774
AiPROT005830	Ai02g8981,Ai02g33242
AiPROT005832	Ai02g8984,Ai02g28305
AiPROT005836	Ai02g8990,Ai02g27778
AiPROT005848	Ai02g9006,Ai02g28441
AiPROT005849	Ai02g9008,Ai02g35199,Ai02g34309
AiPROT005854	Ai02g9013,Ai02g25289
AiPROT005856	Ai02g9015,Ai02g14328
AiPROT005859	Ai02g9027,Ai02g13151
AiPROT005860	Ai02g9028,Ai02g39819
AiPROT005863	Ai02g9034,Ai02g24544
AiPROT005866	Ai02g9038,Ai02g27438
AiPROT005871	Ai02g9043,Ai02g23941
AiPROT005878	Ai02g9052,Ai02g29184
AiPROT005881	Ai02g9057,Ai02g19286
AiPROT005884	Ai02g9060,Ai02g33048
AiPROT005891	Ai02g9072,Ai02g12331
AiPROT005895	Ai02g9079,Ai02g9994
AiPROT005898	Ai02g9087,Ai02g32017
AiPROT005899	Ai02g9088,Ai02g18056
AiPROT005905	Ai02g9098,Ai02g10911
AiPROT005912	Ai02g9105,Ai02g31393
AiPROT005913	Ai02g9107,Ai02g30107
AiPROT005922	Ai02g9124,Ai02g32351
AiPROT005923	Ai02g9126,Ai02g13073
AiPROT005926	Ai02g9129,Ai02g21117
AiPROT005932	Ai02g9135,Ai02g37420
AiPROT005934	Ai02g9137,Ai02g23351,Ai02g18658
AiPROT005935	Ai02g9139,Ai02g11335
AiPROT005943	Ai02g9152,Ai02g17003
AiPROT005944	Ai02g9154,Ai02g21901
AiPROT005946	Ai02g9157,Ai02g9158
AiPROT005947	Ai02g9162,Ai02g25963
AiPROT005952	Ai02g9170,Ai02g12205
AiPROT005975	Ai02g9205,Ai02g20050
AiPROT005976	Ai02g9206,Ai02g30380,Ai02g13338
AiPROT005986	Ai02g9220,Ai02g23109
AiPROT005991	Ai02g9232,Ai02g38155
AiPROT005995	Ai02g9238,Ai02g28177,Ai02g32058
AiPROT005997	Ai02g9240,Ai02g20337
AiPROT006004	Ai02g9247,Ai02g12993
AiPROT006009	Ai02g9252,Ai02g26046
AiPROT006026	Ai02g9276,Ai02g17738
AiPROT006027	Ai02g9277,Ai02g14454
AiPROT006029	Ai02g9282,Ai02g26348
AiPROT006035	Ai02g9292,Ai02g26476
AiPROT006036	Ai02g9293,Ai02g19523
AiPROT006056	Ai02g9320,Ai02g27370
AiPROT006058	Ai02g9323,Ai02g9325
AiPROT006061	Ai02g9327,Ai02g30529
AiPROT006067	Ai02g9333,Ai02g9505
AiPROT006069	Ai02g9335,Ai02g9336
AiPROT006074	Ai02g9341,Ai02g20867
AiPROT006083	Ai02g9361,Ai02g29583
AiPROT006084	Ai02g9362,Ai02g31577
AiPROT006088	Ai02g9369,Ai02g21778
AiPROT006096	Ai02g9378,Ai02g12324
AiPROT006097	Ai02g9381,Ai02g31390
AiPROT006100	Ai02g9388,Ai02g30747
AiPROT006106	Ai02g9399,Ai02g31220
AiPROT006107	Ai02g9400,Ai02g24409
AiPROT006116	Ai02g9413,Ai02g21535
AiPROT006120	Ai02g9419,Ai02g9420
AiPROT006121	Ai02g9421,Ai02g13453
AiPROT006122	Ai02g9423,Ai02g15204
AiPROT006123	Ai02g9425,Ai02g20184,Ai02g15203
AiPROT006124	Ai02g9426,Ai02g31792
AiPROT006125	Ai02g9428,Ai02g21757
AiPROT006130	Ai02g9433,Ai02g18115
AiPROT006133	Ai02g9438,Ai02g20395
AiPROT006152	Ai02g9461,Ai02g22581
AiPROT006153	Ai02g9462,Ai02g27696
AiPROT006154	Ai02g9464,Ai02g30154
AiPROT006155	Ai02g9468,Ai02g17443
AiPROT006159	Ai02g9473,Ai02g28592
AiPROT006160	Ai02g9474,Ai02g33699
AiPROT006161	Ai02g9476,Ai02g16355
AiPROT006163	Ai02g9478,Ai02g11990
AiPROT006171	Ai02g9491,Ai02g16350
AiPROT006184	Ai02g9509,Ai02g26251
AiPROT006200	Ai02g9529,Ai02g33829
AiPROT006203	Ai02g9535,Ai02g22235
AiPROT006205	Ai02g9538,Ai02g27327
AiPROT006206	Ai02g9539,Ai02g23831
AiPROT006207	Ai02g9540,Ai02g26743
AiPROT006208	Ai02g9544,Ai02g14025
AiPROT006209	Ai02g9545,Ai02g30469
AiPROT006213	Ai02g9550,Ai02g34846
AiPROT006214	Ai02g9551,Ai02g12273
AiPROT006220	Ai02g9561,Ai02g23310
AiPROT006226	Ai02g9570,Ai02g17974
AiPROT006228	Ai02g9572,Ai02g29377
AiPROT006232	Ai02g9578,Ai02g31081
AiPROT006233	Ai02g9581,Ai02g14660
AiPROT006238	Ai02g9588,Ai02g34529,Ai02g25363
AiPROT006241	Ai02g9592,Ai02g10939
AiPROT006243	Ai02g9596,Ai02g27624
AiPROT006250	Ai02g9606,Ai02g21564,Ai02g29498
AiPROT006259	Ai02g9620,Ai02g21643
AiPROT006263	Ai02g9624,Ai02g13985
AiPROT006264	Ai02g9625,Ai02g27529
AiPROT006266	Ai02g9627,Ai02g9629
AiPROT006276	Ai02g9639,Ai02g15749
AiPROT006279	Ai02g9642,Ai02g22653
AiPROT006286	Ai02g9650,Ai02g28545
AiPROT006287	Ai02g9651,Ai02g28145
AiPROT006288	Ai02g9652,Ai02g29074
AiPROT006291	Ai02g9655,Ai02g20190
AiPROT006293	Ai02g9658,Ai02g15263
AiPROT006296	Ai02g9661,Ai02g17136
AiPROT006300	Ai02g9671,Ai02g16551
AiPROT006301	Ai02g9672,Ai02g31029
AiPROT006302	Ai02g9673,Ai02g25191
AiPROT006309	Ai02g9681,Ai02g23050
AiPROT006312	Ai02g9687,Ai02g23796
AiPROT006314	Ai02g9689,Ai02g33667
AiPROT006315	Ai02g9691,Ai02g29800
AiPROT006320	Ai02g9701,Ai02g10132
AiPROT006331	Ai02g9722,Ai02g28206
AiPROT006336	Ai02g9730,Ai02g22142
AiPROT006347	Ai02g9745,Ai02g24322,Ai02g11725
AiPROT006348	Ai02g9747,Ai02g30214
AiPROT006351	Ai02g9754,Ai02g20622
AiPROT006360	Ai02g9772,Ai02g14314,Ai02g26312
AiPROT006368	Ai02g9783,Ai02g18483
AiPROT006371	Ai02g9789,Ai02g34771
AiPROT006372	Ai02g9790,Ai02g16231,Ai02g16230
AiPROT006378	Ai02g9799,Ai02g15432
AiPROT006379	Ai02g9800,Ai02g24211
AiPROT006386	Ai02g9807,Ai02g29290
AiPROT006406	Ai02g9831,Ai02g23844
AiPROT006410	Ai02g9835,Ai02g27481
AiPROT006419	Ai02g9844,Ai02g25362
AiPROT006420	Ai02g9845,Ai02g25361
AiPROT006422	Ai02g9848,Ai02g15344
AiPROT006426	Ai02g9865,Ai02g28959
AiPROT006427	Ai02g9866,Ai02g19292
AiPROT006432	Ai02g9872,Ai02g19159
AiPROT006437	Ai02g9877,Ai02g14142
AiPROT006438	Ai02g9885,Ai02g31058
AiPROT006440	Ai02g9888,Ai02g21775
AiPROT006442	Ai02g9890,Ai02g34950
AiPROT006443	Ai02g9892,Ai02g10355,Ai02g34371
AiPROT006444	Ai02g9894,Ai02g34701
AiPROT006451	Ai02g9904,Ai02g9905
AiPROT006455	Ai02g9910,Ai02g19724
AiPROT006471	Ai02g9935,Ai02g15891
AiPROT006481	Ai02g9954,Ai02g28249
AiPROT006492	Ai02g9967,Ai02g17614,Ai02g14990,Ai02g17613
AiPROT006493	Ai02g9971,Ai02g24839
AiPROT006503	Ai02g9986,Ai02g9987
AiPROT006504	Ai02g9988,Ai02g28527
AiPROT006505	Ai02g9989,Ai02g21981,Ai02g21979,Ai02g30319
AiPROT006506	Ai02g9990,Ai02g34280
AiPROT006507	Ai02g9991,Ai02g12892
AiPROT006510	Ai02g9996,Ai02g30894
AiPROT006511	Ai02g9998,Ai02g21566
AiPROT006512	Ai02g9999,Ai02g35255
AiPROT006513	Ai02g10005,Ai02g12717
AiPROT006517	Ai02g10010,Ai02g27873
AiPROT006519	Ai02g10016,Ai02g10025
AiPROT006520	Ai02g10019,Ai02g10024
AiPROT006525	Ai02g10030,Ai02g20349
AiPROT006527	Ai02g10033,Ai02g26478
AiPROT006529	Ai02g10035,Ai02g25914
AiPROT006530	Ai02g10036,Ai02g11253
AiPROT006535	Ai02g10042,Ai02g20419
AiPROT006536	Ai02g10043,Ai02g25799
AiPROT006543	Ai02g10051,Ai02g27323
AiPROT006555	Ai02g10067,Ai02g30205
AiPROT006556	Ai02g10069,Ai02g16810
AiPROT006561	Ai02g10076,Ai02g25299
AiPROT006578	Ai02g10098,Ai02g24876
AiPROT006579	Ai02g10099,Ai02g12966
AiPROT006580	Ai02g10100,Ai02g10102
AiPROT006583	Ai02g10109,Ai02g10795,Ai02g25735
AiPROT006585	Ai02g10112,Ai02g29739
AiPROT006593	Ai02g10124,Ai02g27124
AiPROT006594	Ai02g10125,Ai02g10128,Ai02g10126
AiPROT006599	Ai02g10134,Ai02g33687,Ai02g32043
AiPROT006600	Ai02g10135,Ai02g23702,Ai02g11882,Ai02g11881
AiPROT006603	Ai02g10138,Ai02g10139
AiPROT006604	Ai02g10140,Ai02g29812
AiPROT006610	Ai02g10149,Ai02g13170
AiPROT006615	Ai02g10156,Ai02g10341
AiPROT006617	Ai02g10165,Ai02g32720
AiPROT006620	Ai02g10169,Ai02g11872
AiPROT006623	Ai02g10174,Ai02g28783
AiPROT006626	Ai02g10177,Ai02g19741
AiPROT006627	Ai02g10180,Ai02g29671
AiPROT006631	Ai02g10189,Ai02g26714
AiPROT006632	Ai02g10190,Ai02g34806
AiPROT006642	Ai02g10203,Ai02g17382
AiPROT006643	Ai02g10204,Ai02g26732
AiPROT006644	Ai02g10205,Ai02g14825,Ai02g11792
AiPROT006658	Ai02g10221,Ai02g10429
AiPROT006660	Ai02g10224,Ai02g26341
AiPROT006674	Ai02g10244,Ai02g15771,Ai02g20836
AiPROT006676	Ai02g10248,Ai02g27080
AiPROT006680	Ai02g10254,Ai02g37004
AiPROT006687	Ai02g10265,Ai02g28009
AiPROT006700	Ai02g10280,Ai02g43569
AiPROT006702	Ai02g10285,Ai02g33025
AiPROT006711	Ai02g10299,Ai02g10300
AiPROT006717	Ai02g10307,Ai02g15066
AiPROT006718	Ai02g10309,Ai02g16079
AiPROT006721	Ai02g10315,Ai02g15917,Ai02g31913
AiPROT006722	Ai02g10316,Ai02g27333
AiPROT006724	Ai02g10320,Ai02g23017
AiPROT006735	Ai02g10336,Ai02g31824
AiPROT006736	Ai02g10337,Ai02g25106,Ai02g27289
AiPROT006737	Ai02g10338,Ai02g21463
AiPROT006742	Ai02g10344,Ai02g31275
AiPROT006747	Ai02g10350,Ai02g27391
AiPROT006749	Ai02g10352,Ai02g21977
AiPROT006750	Ai02g10353,Ai02g17388
AiPROT006751	Ai02g10354,Ai02g17387
AiPROT006766	Ai02g10379,Ai02g31710
AiPROT006771	Ai02g10391,Ai02g10392
AiPROT006774	Ai02g10396,Ai02g25474
AiPROT006785	Ai02g10409,Ai02g13144
AiPROT006791	Ai02g10416,Ai02g26460
AiPROT006793	Ai02g10418,Ai02g28212
AiPROT006794	Ai02g10420,Ai02g28526
AiPROT006804	Ai02g10440,Ai02g32139
AiPROT006810	Ai02g10450,Ai02g10652
AiPROT006811	Ai02g10451,Ai02g10651
AiPROT006817	Ai02g10467,Ai02g22398
AiPROT006823	Ai02g10473,Ai02g32089
AiPROT006824	Ai02g10477,Ai02g31742
AiPROT006825	Ai02g10478,Ai02g21726
AiPROT006828	Ai02g10481,Ai02g10483,Ai02g10482
AiPROT006835	Ai02g10495,Ai02g26131
AiPROT006836	Ai02g10496,Ai02g13920
AiPROT006838	Ai02g10500,Ai02g24334
AiPROT006841	Ai02g10503,Ai02g24338
AiPROT006842	Ai02g10504,Ai02g15177
AiPROT006846	Ai02g10508,Ai02g20614
AiPROT006847	Ai02g10509,Ai02g27896
AiPROT006848	Ai02g10510,Ai02g30323
AiPROT006850	Ai02g10512,Ai02g32474
AiPROT006853	Ai02g10515,Ai02g17202
AiPROT006855	Ai02g10517,Ai02g27117
AiPROT006857	Ai02g10522,Ai02g13798
AiPROT006858	Ai02g10524,Ai02g10718
AiPROT006863	Ai02g10529,Ai02g23035
AiPROT006867	Ai02g10534,Ai02g22170
AiPROT006871	Ai02g10539,Ai02g32073
AiPROT006882	Ai02g10551,Ai02g13257,Ai02g31780
AiPROT006888	Ai02g10557,Ai02g16635,Ai02g16633
AiPROT006892	Ai02g10561,Ai02g15528
AiPROT006893	Ai02g10564,Ai02g34522
AiPROT006896	Ai02g10569,Ai02g32508
AiPROT006898	Ai02g10571,Ai02g13499
AiPROT006901	Ai02g10575,Ai02g19016
AiPROT006902	Ai02g10576,Ai02g24282
AiPROT006912	Ai02g10589,Ai02g23009
AiPROT006917	Ai02g10594,Ai02g27241
AiPROT006920	Ai02g10597,Ai02g27446
AiPROT006921	Ai02g10598,Ai02g25887
AiPROT006923	Ai02g10602,Ai02g27679
AiPROT006924	Ai02g10604,Ai02g14787
AiPROT006927	Ai02g10608,Ai02g26704,Ai02g26167
AiPROT006933	Ai02g10614,Ai02g10615
AiPROT006936	Ai02g10619,Ai02g27579
AiPROT006937	Ai02g10620,Ai02g26456
AiPROT006939	Ai02g10622,Ai02g21532
AiPROT006940	Ai02g10623,Ai02g14935
AiPROT006943	Ai02g10628,Ai02g12552
AiPROT006952	Ai02g10643,Ai02g11333,Ai02g24032,Ai02g13472
AiPROT006968	Ai02g10670,Ai02g29582,Ai02g11384
AiPROT006972	Ai02g10674,Ai02g32825
AiPROT006977	Ai02g10684,Ai02g31499
AiPROT006978	Ai02g10686,Ai02g31623
AiPROT006982	Ai02g10694,Ai02g34294
AiPROT006986	Ai02g10700,Ai02g15542
AiPROT006992	Ai02g10711,Ai02g34140
AiPROT006996	Ai02g10715,Ai02g18509
AiPROT007002	Ai02g10724,Ai02g30029
[truncated: 2,322 more rows]
