# Supplementary material for: Comprehensive analyses of genomes, transcriptomes and metabolites of neem tree
Source: PeerJ. 2015 Aug 6;3:e1066. doi: 10.7717/peerj.1066 (PMC4540028; doi:10.7717/peerj.1066)
Supplement: Table S13 [file peerj-03-1066-s013.xls]

## Sheet: Sheet1
Supplementary Table 13: Description of repeats prediction in A. indica using RepeatModeler program.
Sequence ID	Begin	End	Strand	Matching repeat	Class/family	Repeat ID
MP_V2_GENOME_1	278	313	-	rnd-6_family-16561	Unknown	1
MP_V2_GENOME_10	3	37	+	AT_rich	Low_complexity	2
MP_V2_GENOME_10	327	504	-	rnd-6_family-9429	Unknown	3
MP_V2_GENOME_100	611	634	+	AT_rich	Low_complexity	4
MP_V2_GENOME_1000	31	175	-	rnd-1_family-126	Unknown	5
MP_V2_GENOME_1000	867	938	+	(TTAA)n	Simple_repeat	6
MP_V2_GENOME_1000	3229	3377	+	rnd-5_family-1031	LTR/Gypsy	7
MP_V2_GENOME_1000	3639	3660	+	AT_rich	Low_complexity	8
MP_V2_GENOME_10000	179	541	+	rnd-6_family-1630	DNA/MULE-MuDR	9
MP_V2_GENOME_10000	777	814	+	AT_rich	Low_complexity	10
MP_V2_GENOME_10000	915	1098	-	rnd-6_family-2990	Unknown	11
MP_V2_GENOME_10000	1123	1161	+	AT_rich	Low_complexity	12
MP_V2_GENOME_10000	1449	1646	-	rnd-5_family-340	Unknown	13
MP_V2_GENOME_10000	1880	2005	+	rnd-6_family-2416	DNA/MULE-MuDR	14
MP_V2_GENOME_10000	1904	2031	-	rnd-4_family-3525	Unknown	15
MP_V2_GENOME_10000	2046	2170	+	A-rich	Low_complexity	16
MP_V2_GENOME_10000	2208	2388	+	A-rich	Low_complexity	16
MP_V2_GENOME_10000	2395	2445	+	AT_rich	Low_complexity	17
MP_V2_GENOME_10000	2496	2573	+	AT_rich	Low_complexity	18
MP_V2_GENOME_10000	2592	2915	+	rnd-5_family-1436	Unknown	19
MP_V2_GENOME_10000	2952	3003	+	AT_rich	Low_complexity	20
MP_V2_GENOME_10000	3027	3156	-	rnd-6_family-2416	DNA/MULE-MuDR	21
MP_V2_GENOME_10000	3287	3507	+	rnd-3_family-478	Unknown	22
MP_V2_GENOME_10000	3399	3540	-	rnd-4_family-163	Unknown	23
MP_V2_GENOME_10000	3542	3658	-	rnd-6_family-1014	Unknown	24
MP_V2_GENOME_10000	4424	4501	+	AT_rich	Low_complexity	25
MP_V2_GENOME_10000	4990	5013	+	AT_rich	Low_complexity	26
MP_V2_GENOME_10000	5227	5248	+	(CAAAA)n	Simple_repeat	27
MP_V2_GENOME_10000	10622	10682	+	(CAG)n	Simple_repeat	28
MP_V2_GENOME_10000	14775	14807	+	(TTA)n	Simple_repeat	29
MP_V2_GENOME_10000	18426	18524	+	(TTA)n	Simple_repeat	30
MP_V2_GENOME_10000	20206	20480	+	rnd-5_family-340	Unknown	31
MP_V2_GENOME_10001	1	47	-	rnd-4_family-2452	Unknown	32
MP_V2_GENOME_10001	315	357	+	AT_rich	Low_complexity	33
MP_V2_GENOME_10001	469	553	-	rnd-1_family-93	Unknown	34
MP_V2_GENOME_10002	1	109	+	rnd-6_family-10110	Unknown	35
MP_V2_GENOME_10002	112	275	+	rnd-1_family-294	Unknown	36
MP_V2_GENOME_10002	341	524	+	rnd-5_family-206	LTR/Gypsy	37
MP_V2_GENOME_10002	553	588	+	AT_rich	Low_complexity	38
MP_V2_GENOME_10002	625	666	+	AT_rich	Low_complexity	39
MP_V2_GENOME_10003	1	44	+	(TAA)n	Simple_repeat	40
MP_V2_GENOME_10003	177	202	+	(TAAA)n	Simple_repeat	41
MP_V2_GENOME_10003	411	437	+	(TAA)n	Simple_repeat	42
MP_V2_GENOME_10003	7586	7732	+	rnd-6_family-47	Unknown	43
MP_V2_GENOME_10003	7601	7827	+	rnd-6_family-65	LTR/Copia	44
MP_V2_GENOME_10003	8273	8346	+	AT_rich	Low_complexity	45
MP_V2_GENOME_10003	8699	8750	+	AT_rich	Low_complexity	46
MP_V2_GENOME_10003	9869	9909	+	AT_rich	Low_complexity	47
MP_V2_GENOME_10003	10203	10447	+	rnd-6_family-47	Unknown	48
MP_V2_GENOME_10003	10448	10707	+	rnd-1_family-62	Unknown	49
MP_V2_GENOME_10003	10741	10945	-	rnd-5_family-709	Unknown	50
MP_V2_GENOME_10003	10953	11208	-	rnd-1_family-110	Unknown	51
MP_V2_GENOME_10003	11329	11558	+	rnd-5_family-2202	LTR/Gypsy	52
MP_V2_GENOME_10003	11578	12685	+	rnd-4_family-204	Unknown	53
MP_V2_GENOME_10003	11975	12617	-	rnd-6_family-47	Unknown	54
MP_V2_GENOME_10003	13418	13490	-	rnd-4_family-1372	LTR/Gypsy	55
MP_V2_GENOME_10003	14023	14088	+	AT_rich	Low_complexity	56
MP_V2_GENOME_10003	14495	14543	+	(CAAGA)n	Simple_repeat	57
MP_V2_GENOME_10003	14567	14588	+	(TA)n	Simple_repeat	58
MP_V2_GENOME_10003	14992	15055	+	AT_rich	Low_complexity	59
MP_V2_GENOME_10003	15351	15371	+	AT_rich	Low_complexity	60
MP_V2_GENOME_10004	1	301	-	rnd-1_family-182	LTR/Gypsy	61
MP_V2_GENOME_10004	2104	2883	+	rnd-1_family-10	LTR/Copia	62
MP_V2_GENOME_10004	2862	2911	+	rnd-1_family-160	LTR/Copia	63
MP_V2_GENOME_10005	3	89	-	rnd-3_family-101	Unknown	64
MP_V2_GENOME_10006	190	228	+	AT_rich	Low_complexity	65
MP_V2_GENOME_10006	917	1018	+	rnd-6_family-813	DNA/MULE-MuDR	66
MP_V2_GENOME_10008	1	1174	-	rnd-5_family-6500	DNA/MULE-MuDR	67
MP_V2_GENOME_10008	1388	1454	-	rnd-6_family-3949	Unknown	68
MP_V2_GENOME_10008	1698	1755	+	AT_rich	Low_complexity	69
MP_V2_GENOME_10008	1762	1909	-	rnd-6_family-8911	Unknown	70
MP_V2_GENOME_10008	1773	1954	+	rnd-3_family-74	Unknown	71
MP_V2_GENOME_10008	1967	2355	+	rnd-5_family-4983	Unknown	72
MP_V2_GENOME_10008	2391	2506	-	rnd-5_family-3264	Unknown	73
MP_V2_GENOME_10008	2599	2678	+	AT_rich	Low_complexity	74
MP_V2_GENOME_10008	2783	3362	-	rnd-5_family-340	Unknown	75
MP_V2_GENOME_10008	3528	4062	-	rnd-5_family-340	Unknown	75
MP_V2_GENOME_10008	3930	4086	+	rnd-5_family-340	Unknown	76
MP_V2_GENOME_10008	4142	4243	+	rnd-5_family-3264	Unknown	77
MP_V2_GENOME_10008	4348	4379	+	AT_rich	Low_complexity	78
MP_V2_GENOME_10008	4419	4467	+	AT_rich	Low_complexity	79
MP_V2_GENOME_10008	4637	4658	+	(TCC)n	Simple_repeat	80
MP_V2_GENOME_10009	1	650	-	rnd-1_family-290	Unknown	81
MP_V2_GENOME_10009	693	761	+	rnd-1_family-155	Unknown	82
MP_V2_GENOME_1001	1	21	+	(TA)n	Simple_repeat	83
MP_V2_GENOME_1001	1314	1371	+	A-rich	Low_complexity	84
MP_V2_GENOME_1001	1914	1998	+	AT_rich	Low_complexity	85
MP_V2_GENOME_1001	2660	2682	+	(TATG)n	Simple_repeat	86
MP_V2_GENOME_10010	1	426	+	rnd-4_family-1107	Unknown	87
MP_V2_GENOME_10012	419	590	-	rnd-6_family-9796	DNA/MULE-MuDR	88
MP_V2_GENOME_10013	681	843	-	rnd-3_family-1136	Unknown	89
MP_V2_GENOME_10013	1224	1382	+	rnd-4_family-1	Unknown	90
MP_V2_GENOME_10013	3080	4114	+	rnd-6_family-752	Unknown	91
MP_V2_GENOME_10013	4814	6307	+	rnd-6_family-752	Unknown	91
MP_V2_GENOME_10013	6346	6369	+	AT_rich	Low_complexity	92
MP_V2_GENOME_10013	6350	6373	+	AT_rich	Low_complexity	93
MP_V2_GENOME_10013	6659	6777	+	AT_rich	Low_complexity	94
MP_V2_GENOME_10013	6790	6959	+	A-rich	Low_complexity	95
MP_V2_GENOME_10013	7168	7263	-	rnd-6_family-1711	Unknown	96
MP_V2_GENOME_10014	225	2351	-	rnd-6_family-1014	Unknown	97
MP_V2_GENOME_10014	2370	3023	-	rnd-5_family-128	LTR/Gypsy	98
MP_V2_GENOME_10014	3166	3298	+	rnd-6_family-20897	Unknown	99
MP_V2_GENOME_10015	725	840	+	(CTG)n	Simple_repeat	100
MP_V2_GENOME_10015	3870	3903	+	AT_rich	Low_complexity	101
MP_V2_GENOME_10015	4031	4061	+	AT_rich	Low_complexity	102
MP_V2_GENOME_10016	1	75	+	rnd-5_family-4518	DNA/TcMar-Fot1	103
MP_V2_GENOME_10016	76	176	-	rnd-5_family-2304	LTR/Copia	104
MP_V2_GENOME_10016	239	451	+	rnd-1_family-62	Unknown	105
MP_V2_GENOME_10016	448	577	-	rnd-5_family-709	Unknown	106
MP_V2_GENOME_10016	1219	1291	+	rnd-6_family-7089	Unknown	107
MP_V2_GENOME_10016	3387	4957	-	rnd-6_family-11627	LTR/Copia	108
MP_V2_GENOME_10016	5696	5730	-	rnd-1_family-278	LTR/Gypsy	109
MP_V2_GENOME_10016	5741	6125	-	rnd-6_family-11627	LTR/Copia	110
MP_V2_GENOME_10016	6148	6307	+	rnd-5_family-42	LTR/Gypsy	111
MP_V2_GENOME_10016	6509	7751	+	rnd-4_family-335	LTR/Gypsy	112
MP_V2_GENOME_10016	7844	8184	+	rnd-5_family-4222	LTR/Gypsy	113
MP_V2_GENOME_10016	8459	8815	+	rnd-5_family-4222	LTR/Gypsy	113
MP_V2_GENOME_10016	8848	9132	+	rnd-4_family-335	LTR/Gypsy	114
MP_V2_GENOME_10016	9634	9837	+	rnd-6_family-7089	Unknown	115
MP_V2_GENOME_10016	13618	13706	+	rnd-6_family-7089	Unknown	116
MP_V2_GENOME_10016	13789	13892	+	rnd-6_family-7089	Unknown	116
MP_V2_GENOME_10016	13890	14023	-	rnd-1_family-110	Unknown	117
MP_V2_GENOME_10016	14116	14416	-	rnd-6_family-4345	Unknown	118
MP_V2_GENOME_10016	14186	14611	+	rnd-5_family-2202	LTR/Gypsy	119
MP_V2_GENOME_10016	15349	15431	+	rnd-1_family-202	Unknown	120
MP_V2_GENOME_10016	15430	15560	+	rnd-4_family-901	Unknown	121
MP_V2_GENOME_10016	15585	15645	+	rnd-1_family-80	DNA/PIF-Harbinger	122
MP_V2_GENOME_10016	16053	16080	+	(ATG)n	Simple_repeat	123
MP_V2_GENOME_10016	16081	16183	-	rnd-1_family-408	Unknown	124
MP_V2_GENOME_10016	16226	16442	-	rnd-5_family-1776	DNA/MULE-MuDR	125
MP_V2_GENOME_10016	16255	16849	-	rnd-5_family-583	Unknown	126
MP_V2_GENOME_10016	17404	17428	+	AT_rich	Low_complexity	127
MP_V2_GENOME_10016	17486	17694	+	rnd-5_family-1656	LTR/Copia	128
MP_V2_GENOME_10016	17684	17726	+	rnd-6_family-3300	Unknown	129
MP_V2_GENOME_10016	18175	18223	+	AT_rich	Low_complexity	130
MP_V2_GENOME_10016	18261	18321	+	AT_rich	Low_complexity	131
MP_V2_GENOME_10016	18429	18483	+	AT_rich	Low_complexity	132
MP_V2_GENOME_10016	18596	18704	-	rnd-1_family-161	LTR/Gypsy	133
MP_V2_GENOME_10016	19311	19377	+	AT_rich	Low_complexity	134
MP_V2_GENOME_10016	19414	19465	+	rnd-1_family-202	Unknown	135
MP_V2_GENOME_10016	19612	19636	+	AT_rich	Low_complexity	136
MP_V2_GENOME_10016	20265	21899	+	rnd-5_family-599	Unknown	137
MP_V2_GENOME_10016	22034	22501	+	rnd-5_family-599	Unknown	138
MP_V2_GENOME_10016	22496	22642	+	rnd-5_family-599	Unknown	139
MP_V2_GENOME_10016	23220	23471	-	rnd-3_family-341	Unknown	140
MP_V2_GENOME_10016	23515	23617	-	rnd-5_family-1602	Unknown	141
MP_V2_GENOME_10016	23978	24257	-	rnd-1_family-262	LTR/Copia	142
MP_V2_GENOME_10016	24267	24355	-	rnd-5_family-2870	Unknown	143
MP_V2_GENOME_10016	24356	24403	-	rnd-1_family-186	LTR	144
MP_V2_GENOME_10016	24449	24482	-	rnd-5_family-2870	Unknown	143
MP_V2_GENOME_10016	24463	24516	-	rnd-1_family-116	Unknown	145
MP_V2_GENOME_10016	24490	24587	-	rnd-1_family-116	Unknown	146
MP_V2_GENOME_10016	24586	24682	-	rnd-1_family-116	Unknown	147
MP_V2_GENOME_10016	24656	24748	-	rnd-1_family-116	Unknown	148
MP_V2_GENOME_10016	24760	24989	-	rnd-1_family-377	LTR/Copia	149
MP_V2_GENOME_10016	24987	25117	-	rnd-5_family-7004	LTR/Copia	150
MP_V2_GENOME_10016	25119	25591	-	rnd-1_family-299	LTR/Copia	151
MP_V2_GENOME_10016	25610	25769	-	rnd-5_family-4727	LTR/Copia	152
MP_V2_GENOME_10016	25772	26051	-	rnd-1_family-361	LTR/Copia	153
MP_V2_GENOME_10016	26065	26205	-	rnd-1_family-361	LTR/Copia	154
MP_V2_GENOME_10016	26209	26553	-	rnd-1_family-262	LTR/Copia	155
MP_V2_GENOME_10016	26554	26632	-	rnd-5_family-2870	Unknown	156
MP_V2_GENOME_10016	26623	26675	-	rnd-1_family-116	Unknown	157
MP_V2_GENOME_10016	26656	26746	-	rnd-1_family-116	Unknown	158
MP_V2_GENOME_10016	26727	26820	-	rnd-1_family-116	Unknown	159
MP_V2_GENOME_10016	26835	26879	-	rnd-1_family-377	LTR/Copia	160
MP_V2_GENOME_10016	27891	27956	+	AT_rich	Low_complexity	161
MP_V2_GENOME_10016	28619	28876	+	rnd-5_family-583	Unknown	162
MP_V2_GENOME_10016	28948	29064	+	rnd-1_family-408	Unknown	163
MP_V2_GENOME_10016	29472	29608	-	rnd-1_family-80	DNA/PIF-Harbinger	164
MP_V2_GENOME_10016	29617	29913	-	rnd-5_family-1197	Unknown	165
MP_V2_GENOME_10016	29949	30465	-	rnd-1_family-92	LTR/Copia	166
MP_V2_GENOME_10016	30586	30817	-	rnd-6_family-2548	LTR/Copia	167
MP_V2_GENOME_10016	30810	30919	-	rnd-6_family-5275	Unknown	168
MP_V2_GENOME_10016	30865	30930	-	rnd-6_family-550	LTR/Copia	169
MP_V2_GENOME_10016	31067	31249	-	rnd-1_family-95	Unknown	170
MP_V2_GENOME_10016	31250	31305	-	rnd-1_family-194	LTR/Copia	171
MP_V2_GENOME_10016	31569	31809	-	rnd-6_family-3300	Unknown	172
MP_V2_GENOME_10016	31817	32232	-	rnd-5_family-1656	LTR/Copia	173
MP_V2_GENOME_10016	32233	32262	+	(CATATA)n	Simple_repeat	174
MP_V2_GENOME_10016	32263	32526	-	rnd-5_family-1656	LTR/Copia	173
MP_V2_GENOME_10017	1	38	-	rnd-5_family-2656	DNA/MULE-MuDR	175
MP_V2_GENOME_10017	57	1117	-	rnd-1_family-59	DNA/MULE-MuDR	176
MP_V2_GENOME_10017	1118	1238	+	rnd-1_family-220	Unknown	177
MP_V2_GENOME_10017	1167	1974	-	rnd-1_family-302	Unknown	178
MP_V2_GENOME_10017	1976	2082	-	rnd-6_family-3029	Unknown	179
MP_V2_GENOME_10018	118	285	-	rnd-6_family-891	Unknown	180
MP_V2_GENOME_10018	496	567	+	AT_rich	Low_complexity	181
MP_V2_GENOME_10018	759	830	+	AT_rich	Low_complexity	182
MP_V2_GENOME_10018	895	1025	-	rnd-6_family-11148	LTR/Copia	183
MP_V2_GENOME_10018	1028	1068	-	rnd-6_family-15418	Unknown	184
MP_V2_GENOME_10018	1099	1325	-	rnd-4_family-900	Unknown	185
MP_V2_GENOME_10018	1378	1704	-	rnd-6_family-11148	LTR/Copia	183
MP_V2_GENOME_10018	1749	2044	-	rnd-4_family-660	Unknown	186
MP_V2_GENOME_10018	2040	2404	-	rnd-6_family-11148	LTR/Copia	187
MP_V2_GENOME_10018	2583	2618	+	AT_rich	Low_complexity	188
MP_V2_GENOME_10018	2680	2865	-	rnd-6_family-891	Unknown	189
MP_V2_GENOME_10018	3356	3410	+	AT_rich	Low_complexity	190
MP_V2_GENOME_10018	3754	3918	+	rnd-6_family-2282	Unknown	191
MP_V2_GENOME_10019	1	532	-	rnd-5_family-7485	Unknown	192
MP_V2_GENOME_10019	645	885	+	rnd-4_family-140	Unknown	193
MP_V2_GENOME_10019	952	1476	+	rnd-4_family-140	Unknown	194
MP_V2_GENOME_10019	1202	1349	-	rnd-1_family-390	Unknown	195
MP_V2_GENOME_10019	1507	1631	+	rnd-1_family-334	Unknown	196
MP_V2_GENOME_10019	1785	1873	+	rnd-3_family-181	Unknown	197
MP_V2_GENOME_10019	1887	2080	+	rnd-4_family-140	Unknown	198
MP_V2_GENOME_1002	151	274	-	rnd-5_family-318	Unknown	199
MP_V2_GENOME_10020	213	574	-	rnd-5_family-780	Unknown	200
MP_V2_GENOME_10020	591	613	+	(TA)n	Simple_repeat	201
MP_V2_GENOME_10020	861	1634	+	rnd-4_family-1606	LTR/Gypsy	202
MP_V2_GENOME_10021	1	193	+	rnd-3_family-101	Unknown	203
MP_V2_GENOME_10022	7	572	+	rnd-4_family-1105	Unknown	204
MP_V2_GENOME_10022	567	625	+	rnd-1_family-365	Unknown	205
MP_V2_GENOME_10023	40	138	-	rnd-1_family-398	Unknown	206
MP_V2_GENOME_10023	151	300	+	rnd-5_family-405	Unknown	207
MP_V2_GENOME_10024	53	73	+	AT_rich	Low_complexity	208
MP_V2_GENOME_10025	28	172	+	rnd-5_family-690	Unknown	209
MP_V2_GENOME_10025	195	215	+	(TA)n	Simple_repeat	210
MP_V2_GENOME_10026	1	20	+	(TTAA)n	Simple_repeat	211
MP_V2_GENOME_10026	466	614	+	rnd-5_family-1973	LTR/Copia	212
MP_V2_GENOME_10026	500	638	+	rnd-3_family-240	Unknown	213
MP_V2_GENOME_10026	952	978	+	AT_rich	Low_complexity	214
MP_V2_GENOME_10026	1227	1277	+	AT_rich	Low_complexity	215
MP_V2_GENOME_10026	1413	1460	+	AT_rich	Low_complexity	216
MP_V2_GENOME_10026	1679	1864	+	rnd-6_family-1672	Unknown	217
MP_V2_GENOME_10026	1884	1967	+	AT_rich	Low_complexity	218
MP_V2_GENOME_10026	2128	2190	+	AT_rich	Low_complexity	219
MP_V2_GENOME_10026	2338	2599	-	rnd-5_family-1143	Unknown	220
MP_V2_GENOME_10026	2694	2728	+	T-rich	Low_complexity	221
MP_V2_GENOME_10026	2789	2837	+	AT_rich	Low_complexity	222
MP_V2_GENOME_10026	3053	3104	+	T-rich	Low_complexity	223
MP_V2_GENOME_10026	3959	4031	+	AT_rich	Low_complexity	224
MP_V2_GENOME_10026	4408	4592	-	rnd-4_family-1305	Unknown	225
MP_V2_GENOME_10026	4633	4876	-	rnd-6_family-3671	Unknown	226
MP_V2_GENOME_10026	5376	5479	+	rnd-4_family-413	Unknown	227
MP_V2_GENOME_10026	5474	5585	-	rnd-1_family-80	DNA/PIF-Harbinger	228
MP_V2_GENOME_10026	5647	5988	+	rnd-1_family-2	Unknown	229
MP_V2_GENOME_10026	5697	6062	-	rnd-1_family-9	Unknown	230
MP_V2_GENOME_10026	6078	6176	+	rnd-1_family-9	Unknown	231
MP_V2_GENOME_10026	6096	6305	-	rnd-6_family-1587	Unknown	232
MP_V2_GENOME_10026	7002	7503	-	rnd-6_family-1587	Unknown	232
MP_V2_GENOME_10026	7620	7800	-	rnd-6_family-58	Unknown	233
MP_V2_GENOME_10026	7798	7938	-	rnd-6_family-1587	Unknown	232
MP_V2_GENOME_10026	8004	8210	-	rnd-1_family-2	Unknown	234
MP_V2_GENOME_10026	8186	8449	-	rnd-3_family-341	Unknown	235
MP_V2_GENOME_10026	8221	8471	+	rnd-4_family-429	Unknown	236
MP_V2_GENOME_10026	8472	8618	+	rnd-5_family-6500	DNA/MULE-MuDR	237
MP_V2_GENOME_10026	8652	8931	-	rnd-5_family-1436	Unknown	238
MP_V2_GENOME_10026	9021	9090	-	rnd-5_family-58	Unknown	239
MP_V2_GENOME_10026	9299	9323	+	rnd-6_family-4234	DNA/PIF-Harbinger	240
MP_V2_GENOME_10026	9324	9471	-	rnd-3_family-74	Unknown	241
MP_V2_GENOME_10027	961	984	+	AT_rich	Low_complexity	242
MP_V2_GENOME_10027	1123	1162	+	AT_rich	Low_complexity	243
MP_V2_GENOME_10027	1294	1317	+	(TA)n	Simple_repeat	244
MP_V2_GENOME_10027	1356	1509	+	AT_rich	Low_complexity	245
MP_V2_GENOME_10027	2064	2151	+	rnd-4_family-425	Unknown	246
MP_V2_GENOME_10027	2262	2304	+	AT_rich	Low_complexity	247
MP_V2_GENOME_10027	3284	3318	+	(TAA)n	Simple_repeat	248
MP_V2_GENOME_10027	4692	4716	+	AT_rich	Low_complexity	249
MP_V2_GENOME_10028	137	317	+	rnd-3_family-222	Unknown	250
MP_V2_GENOME_10028	325	350	+	(TA)n	Simple_repeat	251
MP_V2_GENOME_10028	533	600	+	AT_rich	Low_complexity	252
MP_V2_GENOME_10029	332	352	+	AT_rich	Low_complexity	253
MP_V2_GENOME_10029	660	684	+	AT_rich	Low_complexity	254
MP_V2_GENOME_10029	766	835	+	AT_rich	Low_complexity	255
MP_V2_GENOME_1003	139	335	-	rnd-5_family-3891	Unknown	256
MP_V2_GENOME_1003	491	757	+	rnd-1_family-62	Unknown	257
MP_V2_GENOME_1003	749	817	-	rnd-5_family-709	Unknown	258
MP_V2_GENOME_1003	821	1117	-	rnd-1_family-205	Unknown	259
MP_V2_GENOME_1003	1143	1463	-	rnd-1_family-195	Unknown	260
MP_V2_GENOME_1003	1469	2880	+	rnd-4_family-194	Unknown	261
MP_V2_GENOME_1003	2881	3394	+	rnd-5_family-42	LTR/Gypsy	262
MP_V2_GENOME_1003	3850	3939	+	AT_rich	Low_complexity	263
MP_V2_GENOME_1003	4016	4163	+	AT_rich	Low_complexity	264
MP_V2_GENOME_1003	4635	4774	+	AT_rich	Low_complexity	265
MP_V2_GENOME_10031	1	134	-	rnd-1_family-87	LTR/Gypsy	266
MP_V2_GENOME_10031	135	218	-	rnd-1_family-1	LTR/Gypsy	267
MP_V2_GENOME_10032	1	173	-	rnd-1_family-164	LTR/Gypsy	268
MP_V2_GENOME_10032	174	535	-	rnd-1_family-211	Unknown	269
MP_V2_GENOME_10032	549	759	-	rnd-4_family-1354	LTR/Gypsy	270
MP_V2_GENOME_10032	762	825	-	rnd-1_family-23	LTR/Gypsy	271
MP_V2_GENOME_10032	1061	1812	-	rnd-1_family-26	LTR/Gypsy	272
MP_V2_GENOME_10032	1890	2041	-	rnd-1_family-308	LTR/Gypsy	273
MP_V2_GENOME_10032	2052	2246	+	rnd-4_family-957	Unknown	274
MP_V2_GENOME_10032	2256	2910	-	rnd-1_family-112	LTR/Gypsy	275
MP_V2_GENOME_10032	2940	3152	+	rnd-4_family-614	Unknown	276
MP_V2_GENOME_10032	3145	3622	+	rnd-1_family-21	Unknown	277
MP_V2_GENOME_10032	4859	5688	+	rnd-5_family-3922	Unknown	278
MP_V2_GENOME_10033	1	734	-	rnd-4_family-96	Unknown	279
MP_V2_GENOME_10033	940	970	+	AT_rich	Low_complexity	280
MP_V2_GENOME_10033	947	971	+	AT_rich	Low_complexity	281
MP_V2_GENOME_10033	1089	1140	+	A-rich	Low_complexity	282
MP_V2_GENOME_10033	1206	1236	+	AT_rich	Low_complexity	283
MP_V2_GENOME_10033	1951	1971	+	AT_rich	Low_complexity	284
MP_V2_GENOME_10033	2393	2426	+	(GA)n	Simple_repeat	285
MP_V2_GENOME_10033	3802	4056	-	rnd-6_family-3937	Unknown	286
MP_V2_GENOME_10033	5542	5572	+	(A)n	Simple_repeat	287
MP_V2_GENOME_10033	6966	6993	+	AT_rich	Low_complexity	288
MP_V2_GENOME_10033	13890	13944	+	T-rich	Low_complexity	289
MP_V2_GENOME_10033	16749	16780	+	AT_rich	Low_complexity	290
MP_V2_GENOME_10033	17392	17420	+	AT_rich	Low_complexity	291
MP_V2_GENOME_10033	17432	17463	+	(TA)n	Simple_repeat	292
MP_V2_GENOME_10033	17487	17508	+	AT_rich	Low_complexity	293
MP_V2_GENOME_10033	17931	18408	+	rnd-6_family-15960	Unknown	294
MP_V2_GENOME_10033	18503	18771	+	rnd-6_family-15960	Unknown	294
MP_V2_GENOME_10033	19482	19506	+	AT_rich	Low_complexity	295
MP_V2_GENOME_10033	19607	19644	+	AT_rich	Low_complexity	296
MP_V2_GENOME_10034	68	95	+	AT_rich	Low_complexity	297
MP_V2_GENOME_10034	6341	6365	+	AT_rich	Low_complexity	298
MP_V2_GENOME_10034	7866	7886	+	AT_rich	Low_complexity	299
MP_V2_GENOME_10034	8803	8938	-	rnd-4_family-425	Unknown	300
MP_V2_GENOME_10034	9760	9783	+	AT_rich	Low_complexity	301
MP_V2_GENOME_10034	9919	9953	+	AT_rich	Low_complexity	302
MP_V2_GENOME_10034	10878	10901	+	AT_rich	Low_complexity	303
MP_V2_GENOME_10034	13143	13180	+	(TTA)n	Simple_repeat	304
MP_V2_GENOME_10034	14611	14638	+	AT_rich	Low_complexity	305
MP_V2_GENOME_10034	14616	14640	+	AT_rich	Low_complexity	306
MP_V2_GENOME_10034	15151	15176	+	AT_rich	Low_complexity	307
MP_V2_GENOME_10035	134	347	-	rnd-1_family-262	LTR/Copia	308
MP_V2_GENOME_10035	378	490	+	rnd-6_family-13499	Unknown	309
MP_V2_GENOME_10035	520	559	+	AT_rich	Low_complexity	310
MP_V2_GENOME_10035	905	993	+	A-rich	Low_complexity	311
MP_V2_GENOME_10035	1256	1363	+	rnd-5_family-4791	Unknown	312
MP_V2_GENOME_10035	1459	1494	+	AT_rich	Low_complexity	313
MP_V2_GENOME_10036	2	83	-	rnd-6_family-65	LTR/Copia	314
MP_V2_GENOME_10036	66	304	-	rnd-6_family-703	Unknown	315
MP_V2_GENOME_10036	103	421	+	rnd-3_family-31	Unknown	316
MP_V2_GENOME_10036	474	677	-	rnd-3_family-74	Unknown	317
MP_V2_GENOME_10036	657	915	-	rnd-3_family-74	Unknown	318
MP_V2_GENOME_10036	1506	1577	+	rnd-5_family-6575	DNA/MULE-MuDR	319
MP_V2_GENOME_10036	1986	2015	+	AT_rich	Low_complexity	320
MP_V2_GENOME_10036	2241	2286	-	rnd-1_family-122	LTR/Copia	321
MP_V2_GENOME_10036	2280	2340	-	rnd-1_family-70	LTR/Copia	322
MP_V2_GENOME_10036	2352	2456	-	rnd-1_family-122	LTR/Copia	323
MP_V2_GENOME_10037	886	1638	-	rnd-1_family-123	Unknown	324
MP_V2_GENOME_10037	1282	1833	+	rnd-1_family-229	Unknown	325
MP_V2_GENOME_10037	1937	2125	+	rnd-5_family-1242	LTR/Gypsy	326
MP_V2_GENOME_10038	1179	1204	+	AT_rich	Low_complexity	327
MP_V2_GENOME_10038	2054	3507	+	rnd-1_family-406	DNA/hAT-Ac	328
MP_V2_GENOME_10038	3516	3767	+	rnd-6_family-1776	Unknown	329
MP_V2_GENOME_10038	4056	4278	+	rnd-6_family-1776	Unknown	330
MP_V2_GENOME_10038	4275	4402	-	rnd-1_family-146	Unknown	331
MP_V2_GENOME_10038	4400	5255	-	rnd-1_family-46	DNA/MULE-MuDR	332
MP_V2_GENOME_10038	5256	5412	-	rnd-6_family-1256	LTR/Copia	333
MP_V2_GENOME_10038	5427	5523	+	rnd-5_family-1764	LTR/ERV1	334
MP_V2_GENOME_10038	5504	5802	+	rnd-5_family-531	Unknown	335
MP_V2_GENOME_10038	5772	5931	-	rnd-5_family-531	Unknown	336
MP_V2_GENOME_10038	5933	6018	-	rnd-6_family-7160	Unknown	337
MP_V2_GENOME_10038	5986	6294	+	rnd-6_family-7160	Unknown	338
MP_V2_GENOME_10038	6783	6912	-	rnd-4_family-96	Unknown	339
MP_V2_GENOME_10038	6919	7004	+	rnd-5_family-1884	DNA/MULE-MuDR	340
MP_V2_GENOME_10038	7186	7422	+	rnd-4_family-900	Unknown	341
MP_V2_GENOME_10038	7442	7479	+	AT_rich	Low_complexity	342
MP_V2_GENOME_10038	7775	7798	+	AT_rich	Low_complexity	343
MP_V2_GENOME_10038	8068	8100	+	(TAA)n	Simple_repeat	344
MP_V2_GENOME_10038	8438	8490	+	(TTA)n	Simple_repeat	345
MP_V2_GENOME_10038	14108	14145	+	AT_rich	Low_complexity	346
MP_V2_GENOME_10038	14228	14263	+	AT_rich	Low_complexity	347
MP_V2_GENOME_10038	14338	14372	+	AT_rich	Low_complexity	348
MP_V2_GENOME_10038	14438	14544	+	AT_rich	Low_complexity	349
MP_V2_GENOME_10038	15272	15403	-	rnd-4_family-1735	Unknown	350
MP_V2_GENOME_10038	15419	15467	+	AT_rich	Low_complexity	351
MP_V2_GENOME_10038	16333	16456	+	rnd-3_family-181	Unknown	352
MP_V2_GENOME_10038	17863	17902	+	AT_rich	Low_complexity	353
MP_V2_GENOME_10038	17914	18079	+	rnd-6_family-7415	DNA/TcMar-Fot1	354
MP_V2_GENOME_10038	19505	19548	+	(TTTTTG)n	Simple_repeat	355
MP_V2_GENOME_10038	20444	21333	+	rnd-5_family-7527	DNA/MULE-MuDR	356
MP_V2_GENOME_10038	23674	23903	+	rnd-1_family-95	Unknown	357
MP_V2_GENOME_10038	23952	24273	+	rnd-6_family-550	LTR/Copia	358
MP_V2_GENOME_10038	23996	24407	+	rnd-6_family-5275	Unknown	359
MP_V2_GENOME_10038	24410	24716	-	rnd-1_family-151	Unknown	360
MP_V2_GENOME_10038	24717	24976	+	rnd-1_family-92	LTR/Copia	361
MP_V2_GENOME_10038	24985	25116	-	rnd-5_family-9102	Unknown	362
MP_V2_GENOME_10038	24993	25137	+	rnd-5_family-3784	Unknown	363
MP_V2_GENOME_10038	25654	27213	-	rnd-6_family-11627	LTR/Copia	364
MP_V2_GENOME_10038	27429	27865	-	rnd-5_family-2846	Unknown	365
MP_V2_GENOME_10038	27866	28342	+	rnd-6_family-2150	DNA/hAT-Ac	366
MP_V2_GENOME_10038	28318	28397	+	rnd-6_family-2150	DNA/hAT-Ac	367
MP_V2_GENOME_10038	28393	28449	+	rnd-6_family-5221	DNA/hAT-Ac	368
MP_V2_GENOME_10038	29230	29329	-	rnd-4_family-397	Unknown	369
MP_V2_GENOME_10039	278	323	+	AT_rich	Low_complexity	370
MP_V2_GENOME_10039	441	762	+	rnd-6_family-14469	Unknown	371
MP_V2_GENOME_1004	1	22	+	AT_rich	Low_complexity	372
MP_V2_GENOME_1004	596	623	+	AT_rich	Low_complexity	373
MP_V2_GENOME_10040	1	917	-	rnd-5_family-662	LTR/Copia	374
MP_V2_GENOME_10042	1	1878	+	rnd-6_family-4935	Unknown	375
MP_V2_GENOME_10042	2642	2663	+	AT_rich	Low_complexity	376
MP_V2_GENOME_10043	65	214	-	rnd-5_family-405	Unknown	377
MP_V2_GENOME_10044	1	164	-	rnd-6_family-3087	Unknown	378
MP_V2_GENOME_10044	148	273	+	rnd-6_family-3880	Unknown	379
MP_V2_GENOME_10044	152	303	-	rnd-6_family-3880	Unknown	380
MP_V2_GENOME_10044	315	596	-	rnd-6_family-3087	Unknown	381
MP_V2_GENOME_10044	562	822	+	rnd-6_family-3880	Unknown	382
MP_V2_GENOME_10044	814	975	+	rnd-5_family-2331	Unknown	383
MP_V2_GENOME_10044	981	1187	-	rnd-1_family-389	Unknown	384
MP_V2_GENOME_10045	16	303	+	rnd-5_family-3614	Unknown	385
MP_V2_GENOME_10045	335	1363	+	rnd-4_family-24	Unknown	386
MP_V2_GENOME_10045	960	2211	-	rnd-6_family-3645	Unknown	387
MP_V2_GENOME_10045	2180	2644	+	rnd-5_family-4874	Unknown	388
MP_V2_GENOME_10045	2734	3189	+	rnd-1_family-391	LTR/Copia	389
MP_V2_GENOME_10045	3201	3394	+	rnd-4_family-940	LTR/Copia	390
MP_V2_GENOME_10045	3347	4145	-	rnd-5_family-3614	Unknown	391
MP_V2_GENOME_10045	4133	4350	+	rnd-1_family-9	Unknown	392
MP_V2_GENOME_10045	4340	4400	-	rnd-1_family-2	Unknown	393
MP_V2_GENOME_10045	4464	5286	-	rnd-5_family-3614	Unknown	394
MP_V2_GENOME_10046	1	183	-	rnd-5_family-1662	LTR/Copia	395
MP_V2_GENOME_10046	184	401	-	rnd-1_family-306	LTR/Copia	396
MP_V2_GENOME_10046	402	470	-	rnd-5_family-3784	Unknown	397
MP_V2_GENOME_10046	509	781	-	rnd-1_family-92	LTR/Copia	398
MP_V2_GENOME_10046	782	1541	+	rnd-5_family-3779	Unknown	399
MP_V2_GENOME_10046	1548	1784	-	rnd-1_family-95	Unknown	400
MP_V2_GENOME_10046	2099	2189	+	rnd-1_family-74	Unknown	401
MP_V2_GENOME_10046	2128	2454	-	rnd-1_family-0	Unknown	402
MP_V2_GENOME_10046	2459	2534	-	rnd-6_family-614	Unknown	403
MP_V2_GENOME_10046	2521	2735	+	rnd-1_family-123	Unknown	404
MP_V2_GENOME_10046	2738	2885	+	rnd-5_family-701	Unknown	405
MP_V2_GENOME_10046	2766	2905	-	rnd-1_family-1	LTR/Gypsy	406
MP_V2_GENOME_10046	3058	3204	+	rnd-5_family-9499	Unknown	407
MP_V2_GENOME_10046	3071	3166	-	rnd-3_family-1136	Unknown	408
5183	7627	-10287	rnd-6_family-13388	Unknown	0
MP_V2_GENOME_10046	7727	7787	+	rnd-5_family-1659	LTR/Copia	410
MP_V2_GENOME_10046	7802	7877	+	rnd-5_family-1659	LTR/Copia	410
9112	10704	-7210	rnd-6_family-13388	Unknown	0
MP_V2_GENOME_10046	10703	11176	-	rnd-5_family-300	Unknown	412
MP_V2_GENOME_10046	11157	11925	-	rnd-5_family-300	Unknown	413
MP_V2_GENOME_10046	11937	13075	+	rnd-5_family-9499	Unknown	414
MP_V2_GENOME_10046	13078	13555	-	rnd-3_family-1136	Unknown	415
MP_V2_GENOME_10046	13783	13819	+	(CATA)n	Simple_repeat	416
MP_V2_GENOME_10046	14467	15086	-	rnd-4_family-940	LTR/Copia	417
MP_V2_GENOME_10046	15121	15196	-	rnd-1_family-16	LTR/Gypsy	418
MP_V2_GENOME_10046	15194	15378	+	rnd-4_family-614	Unknown	419
MP_V2_GENOME_10046	15387	15549	+	rnd-1_family-21	Unknown	420
MP_V2_GENOME_10046	15547	15704	-	rnd-5_family-2178	Unknown	421
MP_V2_GENOME_10046	15712	15988	+	rnd-1_family-63	Unknown	422
MP_V2_GENOME_10046	15875	16088	-	rnd-1_family-103	Unknown	423
MP_V2_GENOME_10046	15989	16041	-	rnd-1_family-27	LTR/Gypsy	424
MP_V2_GENOME_10046	16091	16275	+	rnd-1_family-128	Unknown	425
MP_V2_GENOME_10046	16416	16471	+	rnd-4_family-753	Unknown	426
MP_V2_GENOME_10046	16440	16744	+	rnd-4_family-753	Unknown	427
MP_V2_GENOME_10046	16799	17263	-	rnd-1_family-391	LTR/Copia	428
MP_V2_GENOME_10046	17262	17663	-	rnd-5_family-4514	Unknown	429
MP_V2_GENOME_10047	50	225	-	rnd-6_family-5401	Unknown	430
MP_V2_GENOME_10047	337	358	+	AT_rich	Low_complexity	431
MP_V2_GENOME_10047	1217	1271	+	rnd-4_family-1105	Unknown	432
MP_V2_GENOME_10048	235	257	+	(GAA)n	Simple_repeat	433
MP_V2_GENOME_10048	1182	1310	-	rnd-5_family-5353	Unknown	434
MP_V2_GENOME_10048	1377	1970	-	rnd-6_family-4275	Unknown	435
MP_V2_GENOME_10048	2309	2360	+	AT_rich	Low_complexity	436
MP_V2_GENOME_10048	2531	2558	+	AT_rich	Low_complexity	437
MP_V2_GENOME_10049	1556	1745	+	rnd-6_family-1672	Unknown	438
MP_V2_GENOME_10049	2080	2102	+	(CACAA)n	Simple_repeat	439
MP_V2_GENOME_10049	3376	3424	-	rnd-3_family-240	Unknown	440
MP_V2_GENOME_10049	5212	5235	+	AT_rich	Low_complexity	441
MP_V2_GENOME_10049	5522	5578	+	AT_rich	Low_complexity	442
MP_V2_GENOME_10049	9806	9834	+	(TTTC)n	Simple_repeat	443
MP_V2_GENOME_10049	10958	11059	-	rnd-5_family-318	Unknown	444
MP_V2_GENOME_10049	11067	11112	+	AT_rich	Low_complexity	445
MP_V2_GENOME_10049	11191	11239	+	AT_rich	Low_complexity	446
MP_V2_GENOME_10049	25623	25646	+	(GAAA)n	Simple_repeat	447
MP_V2_GENOME_10049	26278	26319	+	AT_rich	Low_complexity	448
MP_V2_GENOME_10049	26626	26653	+	AT_rich	Low_complexity	449
MP_V2_GENOME_10049	26694	26722	+	(TTTTA)n	Simple_repeat	450
MP_V2_GENOME_10049	32363	32444	+	AT_rich	Low_complexity	451
MP_V2_GENOME_10049	38004	38075	+	AT_rich	Low_complexity	452
MP_V2_GENOME_10049	38334	38424	+	rnd-5_family-3197	Unknown	453
MP_V2_GENOME_10049	38655	39347	-	rnd-1_family-122	LTR/Copia	454
MP_V2_GENOME_10049	40581	40826	-	rnd-5_family-1958	Unknown	455
MP_V2_GENOME_10049	40881	41009	+	rnd-4_family-425	Unknown	456
MP_V2_GENOME_10049	45180	45570	+	rnd-6_family-1348	Unknown	457
MP_V2_GENOME_10049	45577	45679	+	rnd-6_family-1348	Unknown	458
MP_V2_GENOME_10049	45930	46033	-	rnd-6_family-1348	Unknown	459
MP_V2_GENOME_10049	46218	46344	-	rnd-6_family-6404	Unknown	460
MP_V2_GENOME_10049	46904	46929	+	AT_rich	Low_complexity	461
MP_V2_GENOME_10049	52488	52514	+	(TAA)n	Simple_repeat	462
MP_V2_GENOME_10049	56834	56916	+	AT_rich	Low_complexity	463
MP_V2_GENOME_10049	57594	57780	+	AT_rich	Low_complexity	464
MP_V2_GENOME_10049	58286	58321	+	(TTA)n	Simple_repeat	465
MP_V2_GENOME_10049	59066	59432	+	rnd-5_family-3285	Unknown	466
MP_V2_GENOME_10049	62170	62381	-	rnd-4_family-413	Unknown	467
MP_V2_GENOME_10049	63219	63269	-	rnd-4_family-425	Unknown	468
MP_V2_GENOME_10049	63300	63372	+	rnd-4_family-425	Unknown	469
MP_V2_GENOME_10049	64825	64848	+	(CGTG)n	Simple_repeat	470
MP_V2_GENOME_10049	65670	65692	+	AT_rich	Low_complexity	471
MP_V2_GENOME_10049	66043	66105	-	rnd-4_family-425	Unknown	472
MP_V2_GENOME_10049	66217	66318	+	rnd-6_family-5728	Unknown	473
MP_V2_GENOME_10049	66484	66506	+	(TAAAA)n	Simple_repeat	474
MP_V2_GENOME_1005	3	44	-	rnd-1_family-1	LTR/Gypsy	475
MP_V2_GENOME_1005	45	135	-	rnd-1_family-330	LTR/Gypsy	476
MP_V2_GENOME_10050	9	1106	-	rnd-1_family-51	LTR/Gypsy	477
MP_V2_GENOME_10050	1112	1880	+	rnd-1_family-13	Unknown	478
MP_V2_GENOME_10050	1428	2130	-	rnd-1_family-15	Unknown	479
MP_V2_GENOME_10051	3	115	-	rnd-1_family-24	LTR/Gypsy	480
MP_V2_GENOME_10052	2081	2352	-	rnd-3_family-31	Unknown	481
MP_V2_GENOME_10053	1	21	+	(TA)n	Simple_repeat	482
MP_V2_GENOME_10053	494	522	+	AT_rich	Low_complexity	483
MP_V2_GENOME_10054	1	84	+	rnd-3_family-49	Unknown	484
MP_V2_GENOME_10054	172	238	+	AT_rich	Low_complexity	485
MP_V2_GENOME_10054	542	579	+	(TTTTC)n	Simple_repeat	486
MP_V2_GENOME_10054	1166	1187	+	AT_rich	Low_complexity	487
MP_V2_GENOME_10054	5651	5683	+	(TTA)n	Simple_repeat	488
MP_V2_GENOME_10054	9959	9979	+	(TA)n	Simple_repeat	489
MP_V2_GENOME_10054	10264	10320	+	AT_rich	Low_complexity	490
MP_V2_GENOME_10054	10471	10506	+	(TTA)n	Simple_repeat	491
MP_V2_GENOME_10054	15855	15946	-	rnd-3_family-240	Unknown	492
MP_V2_GENOME_10054	16869	16956	+	AT_rich	Low_complexity	493
MP_V2_GENOME_10054	17405	17432	+	(TA)n	Simple_repeat	494
MP_V2_GENOME_10054	17813	17833	+	(TTTA)n	Simple_repeat	495
MP_V2_GENOME_10054	18825	18883	+	AT_rich	Low_complexity	496
MP_V2_GENOME_10054	19562	19645	-	rnd-6_family-9226	Unknown	497
MP_V2_GENOME_10054	19572	19836	+	rnd-6_family-13715	Unknown	498
MP_V2_GENOME_10054	19800	20092	-	rnd-4_family-429	Unknown	499
MP_V2_GENOME_10054	19876	20125	+	rnd-5_family-690	Unknown	500
MP_V2_GENOME_10054	20126	20209	+	AT_rich	Low_complexity	501
MP_V2_GENOME_10054	20292	20418	+	rnd-4_family-313	Unknown	502
MP_V2_GENOME_10054	20501	20557	+	AT_rich	Low_complexity	503
MP_V2_GENOME_10054	21031	21249	-	rnd-5_family-6024	Unknown	504
MP_V2_GENOME_10054	21671	21726	+	CT-rich	Low_complexity	505
MP_V2_GENOME_10054	28419	28442	+	AT_rich	Low_complexity	506
MP_V2_GENOME_10054	28918	28946	+	(TCTA)n	Simple_repeat	507
MP_V2_GENOME_10054	30429	30449	+	(TA)n	Simple_repeat	508
MP_V2_GENOME_10054	33551	33572	+	AT_rich	Low_complexity	509
MP_V2_GENOME_10054	34522	34583	+	AT_rich	Low_complexity	510
MP_V2_GENOME_10055	1	105	-	rnd-6_family-2009	Unknown	511
MP_V2_GENOME_10057	1	215	+	rnd-5_family-22	Unknown	512
MP_V2_GENOME_10057	725	764	+	(TA)n	Simple_repeat	513
MP_V2_GENOME_10057	1413	1694	+	rnd-6_family-6281	Unknown	514
MP_V2_GENOME_10057	1444	1675	-	rnd-3_family-478	Unknown	515
MP_V2_GENOME_10057	1890	2145	-	rnd-6_family-1409	Unknown	516
MP_V2_GENOME_10057	2433	2580	+	AT_rich	Low_complexity	517
MP_V2_GENOME_10057	2690	2776	+	AT_rich	Low_complexity	518
MP_V2_GENOME_10057	2754	2780	+	AT_rich	Low_complexity	519
MP_V2_GENOME_10057	3239	3258	+	(TA)n	Simple_repeat	520
MP_V2_GENOME_10057	5884	5934	+	AT_rich	Low_complexity	521
MP_V2_GENOME_10057	7563	7874	+	rnd-5_family-340	Unknown	522
MP_V2_GENOME_10057	8511	8745	-	rnd-5_family-690	Unknown	523
MP_V2_GENOME_10057	8536	8785	+	rnd-5_family-58	Unknown	524
MP_V2_GENOME_10057	8944	9090	+	rnd-5_family-690	Unknown	525
MP_V2_GENOME_10057	9337	9357	+	(TAAA)n	Simple_repeat	526
MP_V2_GENOME_10057	9633	9955	-	rnd-6_family-2421	Unknown	527
MP_V2_GENOME_10057	16325	16349	+	AT_rich	Low_complexity	528
MP_V2_GENOME_10057	16376	16400	+	AT_rich	Low_complexity	529
MP_V2_GENOME_10057	17238	17314	-	rnd-4_family-425	Unknown	530
MP_V2_GENOME_10057	17347	17700	-	rnd-4_family-1	Unknown	531
MP_V2_GENOME_10057	18509	18703	+	rnd-5_family-5727	Unknown	532
MP_V2_GENOME_10057	19576	19602	+	(TC)n	Simple_repeat	533
MP_V2_GENOME_10058	1	629	+	rnd-4_family-492	LTR/Copia	534
MP_V2_GENOME_10058	632	2026	+	rnd-6_family-11439	LTR/Copia	535
MP_V2_GENOME_10058	2036	2156	+	rnd-1_family-83	Unknown	536
MP_V2_GENOME_10058	2330	2350	+	AT_rich	Low_complexity	537
MP_V2_GENOME_10058	2596	2632	+	AT_rich	Low_complexity	538
MP_V2_GENOME_10058	3618	3710	+	rnd-6_family-1672	Unknown	539
MP_V2_GENOME_10059	1	162	-	rnd-5_family-714	LTR/Gypsy	540
MP_V2_GENOME_10059	300	419	-	rnd-5_family-1503	DNA/hAT-Ac	541
MP_V2_GENOME_10059	496	1323	+	rnd-4_family-39	Unknown	542
MP_V2_GENOME_10059	534	1278	-	rnd-5_family-3278	Unknown	543
MP_V2_GENOME_10059	1273	1459	-	rnd-5_family-34	DNA/hAT-Ac	544
MP_V2_GENOME_10059	2349	2490	+	rnd-1_family-126	Unknown	545
MP_V2_GENOME_10059	2491	2511	+	AT_rich	Low_complexity	546
MP_V2_GENOME_10059	2512	2635	+	rnd-4_family-2085	Unknown	547
MP_V2_GENOME_10059	2612	2707	-	rnd-1_family-126	Unknown	548
MP_V2_GENOME_10059	2717	2758	+	AT_rich	Low_complexity	549
MP_V2_GENOME_10059	3075	3464	-	rnd-1_family-438	Unknown	550
MP_V2_GENOME_10059	3800	3960	-	rnd-1_family-388	Unknown	551
MP_V2_GENOME_1006	2628	2651	+	AT_rich	Low_complexity	552
MP_V2_GENOME_1006	2932	3063	-	rnd-4_family-425	Unknown	553
MP_V2_GENOME_1006	3154	3224	-	rnd-6_family-14191	Unknown	554
MP_V2_GENOME_1006	4158	4289	+	rnd-6_family-8015	DNA/PIF-Harbinger	555
MP_V2_GENOME_1006	6043	6169	-	rnd-4_family-425	Unknown	556
MP_V2_GENOME_1006	6181	6386	-	rnd-5_family-425	Unknown	557
MP_V2_GENOME_10060	15	338	-	rnd-4_family-527	LTR/Copia	558
MP_V2_GENOME_10061	1	451	+	rnd-5_family-255	LTR/Copia	559
MP_V2_GENOME_10061	463	723	+	rnd-5_family-255	LTR/Copia	560
MP_V2_GENOME_10061	724	819	+	rnd-6_family-2608	Unknown	561
MP_V2_GENOME_10061	820	1140	+	rnd-6_family-2608	Unknown	561
MP_V2_GENOME_10061	1348	1692	-	rnd-1_family-151	Unknown	562
MP_V2_GENOME_10063	2	333	+	rnd-1_family-9	Unknown	563
MP_V2_GENOME_10063	50	419	-	rnd-1_family-2	Unknown	564
MP_V2_GENOME_10063	440	590	-	rnd-4_family-58	Unknown	565
MP_V2_GENOME_10063	642	665	-	rnd-6_family-4899	LTR/Copia	566
MP_V2_GENOME_10063	666	897	-	rnd-5_family-929	Unknown	567
MP_V2_GENOME_10063	933	1296	-	rnd-5_family-5353	Unknown	568
MP_V2_GENOME_10063	1066	1490	+	rnd-4_family-39	Unknown	569
MP_V2_GENOME_10063	1530	1776	-	rnd-5_family-1436	Unknown	570
MP_V2_GENOME_10063	1779	2034	+	rnd-6_family-4898	Unknown	571
MP_V2_GENOME_10063	2043	2107	+	AT_rich	Low_complexity	572
MP_V2_GENOME_10063	2362	2385	+	AT_rich	Low_complexity	573
MP_V2_GENOME_10063	2722	2968	-	rnd-6_family-4899	LTR/Copia	574
MP_V2_GENOME_10063	2969	3072	+	rnd-1_family-122	LTR/Copia	575
MP_V2_GENOME_10063	3161	3379	+	rnd-1_family-122	LTR/Copia	575
MP_V2_GENOME_10064	1	258	-	rnd-1_family-129	LTR/Gypsy	576
MP_V2_GENOME_10065	1	36	+	(TTA)n	Simple_repeat	577
MP_V2_GENOME_10065	77	97	+	AT_rich	Low_complexity	578
MP_V2_GENOME_10065	325	358	+	GC_rich	Low_complexity	579
MP_V2_GENOME_10065	562	685	-	rnd-6_family-2627	Unknown	580
MP_V2_GENOME_10065	938	1695	+	rnd-6_family-4675	Unknown	581
MP_V2_GENOME_10065	2203	2332	+	rnd-5_family-1616	Unknown	582
MP_V2_GENOME_10065	2986	3029	+	AT_rich	Low_complexity	583
MP_V2_GENOME_10065	3149	3306	-	rnd-1_family-126	Unknown	584
MP_V2_GENOME_10066	1	202	-	rnd-6_family-1409	Unknown	585
MP_V2_GENOME_10066	2568	2626	+	rnd-5_family-3995	SINE?	586
MP_V2_GENOME_10066	3066	3129	+	AT_rich	Low_complexity	587
MP_V2_GENOME_10066	3297	3322	+	AT_rich	Low_complexity	588
MP_V2_GENOME_10066	3483	3712	+	rnd-5_family-5727	Unknown	589
MP_V2_GENOME_10066	3626	3749	-	rnd-6_family-12771	Unknown	590
MP_V2_GENOME_10066	10657	10802	+	rnd-3_family-240	Unknown	591
MP_V2_GENOME_10066	16624	16699	+	AT_rich	Low_complexity	592
MP_V2_GENOME_10066	17303	17323	+	AT_rich	Low_complexity	593
MP_V2_GENOME_10066	20883	21197	-	rnd-5_family-3351	DNA/hAT-Ac	594
MP_V2_GENOME_10066	20884	21232	+	rnd-5_family-34	DNA/hAT-Ac	595
MP_V2_GENOME_10066	23899	23924	+	(TTG)n	Simple_repeat	596
MP_V2_GENOME_10066	24153	24291	-	rnd-4_family-96	Unknown	597
MP_V2_GENOME_10066	25323	25407	+	rnd-4_family-96	Unknown	598
MP_V2_GENOME_10066	25671	25751	+	AT_rich	Low_complexity	599
MP_V2_GENOME_10066	26540	26657	-	rnd-4_family-151	Unknown	600
MP_V2_GENOME_10067	1	36	+	AT_rich	Low_complexity	601
MP_V2_GENOME_10067	272	315	+	(TGAA)n	Simple_repeat	602
MP_V2_GENOME_10068	333	354	+	AT_rich	Low_complexity	603
MP_V2_GENOME_10068	384	1987	+	rnd-5_family-3614	Unknown	604
MP_V2_GENOME_10068	2051	2207	+	rnd-1_family-2	Unknown	605
MP_V2_GENOME_10068	2202	2428	-	rnd-1_family-9	Unknown	606
MP_V2_GENOME_10068	2430	3047	+	rnd-5_family-3614	Unknown	607
MP_V2_GENOME_10069	8	81	+	(TA)n	Simple_repeat	608
MP_V2_GENOME_10069	337	453	+	rnd-6_family-5190	Unknown	609
MP_V2_GENOME_10069	358	488	-	rnd-6_family-5190	Unknown	610
MP_V2_GENOME_10069	1222	1438	-	rnd-6_family-5190	Unknown	611
MP_V2_GENOME_10069	1528	1624	+	rnd-5_family-2720	Unknown	612
MP_V2_GENOME_10069	1744	1797	+	AT_rich	Low_complexity	613
MP_V2_GENOME_10069	2193	2407	-	rnd-6_family-10271	Unknown	614
MP_V2_GENOME_10069	2445	2491	-	rnd-5_family-605	LTR/Caulimovirus	615
MP_V2_GENOME_10069	2539	2884	-	rnd-5_family-605	LTR/Caulimovirus	615
MP_V2_GENOME_10069	2883	3065	-	rnd-6_family-10271	Unknown	616
MP_V2_GENOME_10069	3059	3439	+	rnd-6_family-1605	Unknown	617
MP_V2_GENOME_10069	3637	3673	+	(CAG)n	Simple_repeat	618
MP_V2_GENOME_10069	3790	4161	+	rnd-5_family-2281	Unknown	619
MP_V2_GENOME_10069	4317	6194	-	rnd-5_family-605	LTR/Caulimovirus	620
MP_V2_GENOME_10069	6195	6465	-	rnd-1_family-165	LTR/Gypsy	621
MP_V2_GENOME_10069	6477	6615	-	rnd-1_family-1	LTR/Gypsy	622
MP_V2_GENOME_10069	6615	6795	-	rnd-1_family-165	LTR/Gypsy	623
MP_V2_GENOME_10069	7016	7531	-	rnd-1_family-165	LTR/Gypsy	623
MP_V2_GENOME_10069	7545	8006	-	rnd-1_family-165	LTR/Gypsy	624
MP_V2_GENOME_10069	8013	8212	-	rnd-1_family-165	LTR/Gypsy	623
MP_V2_GENOME_1007	593	647	+	AT_rich	Low_complexity	625
MP_V2_GENOME_1007	739	901	+	AT_rich	Low_complexity	626
MP_V2_GENOME_1007	1000	1025	+	(TA)n	Simple_repeat	627
MP_V2_GENOME_1007	6130	6188	-	rnd-6_family-3793	Unknown	628
MP_V2_GENOME_1007	7305	7370	+	AT_rich	Low_complexity	629
MP_V2_GENOME_1007	7413	7508	+	rnd-1_family-9	Unknown	630
MP_V2_GENOME_10070	1	96	-	rnd-1_family-294	Unknown	631
MP_V2_GENOME_10070	84	832	-	rnd-5_family-206	LTR/Gypsy	632
MP_V2_GENOME_10070	96	877	-	rnd-5_family-5202	Unknown	633
MP_V2_GENOME_10070	878	904	+	(TA)n	Simple_repeat	634
MP_V2_GENOME_10070	905	998	-	rnd-5_family-5202	Unknown	633
MP_V2_GENOME_10070	1041	1154	+	rnd-3_family-36	Unknown	635
MP_V2_GENOME_10070	1158	1214	-	rnd-4_family-136	Unknown	636
MP_V2_GENOME_10070	1217	1393	+	rnd-4_family-614	Unknown	637
MP_V2_GENOME_10071	1	30	+	(GA)n	Simple_repeat	638
MP_V2_GENOME_10071	2054	2074	+	(TA)n	Simple_repeat	639
MP_V2_GENOME_10071	4270	4292	+	(CAAA)n	Simple_repeat	640
MP_V2_GENOME_10071	5190	5227	+	AT_rich	Low_complexity	641
MP_V2_GENOME_10071	5288	5328	+	AT_rich	Low_complexity	642
MP_V2_GENOME_10071	5496	5517	+	AT_rich	Low_complexity	643
MP_V2_GENOME_10071	9825	9870	+	AT_rich	Low_complexity	644
MP_V2_GENOME_10071	10422	10485	+	AT_rich	Low_complexity	645
MP_V2_GENOME_10071	10706	10747	+	AT_rich	Low_complexity	646
MP_V2_GENOME_10072	1	41	+	rnd-5_family-2425	Unknown	647
MP_V2_GENOME_10072	307	445	-	rnd-5_family-58	Unknown	648
MP_V2_GENOME_10072	467	490	+	AT_rich	Low_complexity	649
MP_V2_GENOME_10073	21	87	+	AT_rich	Low_complexity	650
MP_V2_GENOME_10073	5691	5710	+	(TA)n	Simple_repeat	651
MP_V2_GENOME_10073	8438	8460	+	AT_rich	Low_complexity	652
MP_V2_GENOME_10073	9461	9634	-	rnd-6_family-1672	Unknown	653
MP_V2_GENOME_10073	9490	9620	+	rnd-3_family-240	Unknown	654
MP_V2_GENOME_10073	10577	10597	+	AT_rich	Low_complexity	655
MP_V2_GENOME_10073	11252	11391	+	AT_rich	Low_complexity	656
MP_V2_GENOME_10074	1	82	-	rnd-1_family-160	LTR/Copia	657
MP_V2_GENOME_10074	61	166	-	rnd-1_family-10	LTR/Copia	658
MP_V2_GENOME_10075	8	365	+	rnd-4_family-2452	Unknown	659
MP_V2_GENOME_10075	601	1295	-	rnd-5_family-223	Unknown	660
MP_V2_GENOME_10075	2121	2199	-	rnd-5_family-1436	Unknown	661
MP_V2_GENOME_10075	3012	3032	+	(TTTTA)n	Simple_repeat	662
MP_V2_GENOME_10075	3068	3274	+	AT_rich	Low_complexity	663
MP_V2_GENOME_10075	3366	3391	+	(TAAA)n	Simple_repeat	664
MP_V2_GENOME_10075	3523	3544	+	(TAAA)n	Simple_repeat	665
MP_V2_GENOME_10075	3576	3599	+	AT_rich	Low_complexity	666
MP_V2_GENOME_10075	4043	4134	-	rnd-5_family-1958	Unknown	667
MP_V2_GENOME_10076	1	119	-	rnd-3_family-101	Unknown	668
MP_V2_GENOME_10077	4	1344	+	rnd-6_family-3010	DNA/PIF-Harbinger	669
MP_V2_GENOME_10077	1345	1391	+	(TA)n	Simple_repeat	670
MP_V2_GENOME_10077	1392	1618	+	rnd-6_family-3010	DNA/PIF-Harbinger	669
MP_V2_GENOME_10077	1630	2553	+	rnd-6_family-3010	DNA/PIF-Harbinger	671
MP_V2_GENOME_10077	2556	2690	+	rnd-1_family-80	DNA/PIF-Harbinger	672
MP_V2_GENOME_10077	2762	3028	+	rnd-4_family-901	Unknown	673
MP_V2_GENOME_10078	1	598	-	rnd-5_family-2616	LTR/Copia	674
MP_V2_GENOME_10079	2212	2330	+	rnd-6_family-11087	Unknown	675
MP_V2_GENOME_1008	139	245	-	rnd-4_family-2362	Unknown	676
MP_V2_GENOME_1008	233	419	+	rnd-5_family-549	Unknown	677
MP_V2_GENOME_1008	611	678	+	rnd-6_family-11543	Unknown	678
MP_V2_GENOME_1008	723	898	+	rnd-6_family-11543	Unknown	679
MP_V2_GENOME_1008	1019	1110	+	rnd-6_family-2402	Unknown	680
MP_V2_GENOME_1008	1121	1365	+	rnd-5_family-3857	Unknown	681
MP_V2_GENOME_10081	1	457	+	rnd-1_family-196	DNA/CMC-EnSpm	682
MP_V2_GENOME_10082	636	661	+	(TA)n	Simple_repeat	683
MP_V2_GENOME_10082	795	831	+	AT_rich	Low_complexity	684
MP_V2_GENOME_10082	1094	1121	+	AT_rich	Low_complexity	685
MP_V2_GENOME_10082	1156	1183	+	(CTAAG)n	Simple_repeat	686
MP_V2_GENOME_10082	1207	1236	+	(TTAA)n	Simple_repeat	687
MP_V2_GENOME_10082	1671	1702	+	(TTTA)n	Simple_repeat	688
MP_V2_GENOME_10082	3232	3252	+	AT_rich	Low_complexity	689
MP_V2_GENOME_10082	3435	3461	+	AT_rich	Low_complexity	690
MP_V2_GENOME_10082	3742	3805	+	AT_rich	Low_complexity	691
MP_V2_GENOME_10082	4880	4915	+	AT_rich	Low_complexity	692
MP_V2_GENOME_10082	5939	6055	-	rnd-6_family-1039	Unknown	693
MP_V2_GENOME_10082	7335	7878	-	rnd-6_family-1039	Unknown	694
MP_V2_GENOME_10082	7464	7879	+	rnd-5_family-1336	DNA/PIF-Harbinger	695
MP_V2_GENOME_10082	10303	10627	+	rnd-1_family-2	Unknown	696
MP_V2_GENOME_10082	10631	10652	+	(TA)n	Simple_repeat	697
MP_V2_GENOME_10082	12033	12056	+	(TAA)n	Simple_repeat	698
MP_V2_GENOME_10082	12063	12540	+	rnd-5_family-9683	Unknown	699
MP_V2_GENOME_10082	12347	12812	-	rnd-6_family-2009	Unknown	700
MP_V2_GENOME_10082	12899	13140	-	rnd-4_family-660	Unknown	701
MP_V2_GENOME_10082	13385	13531	-	rnd-3_family-49	Unknown	702
MP_V2_GENOME_10083	2	591	-	rnd-4_family-24	Unknown	703
MP_V2_GENOME_10083	809	881	-	rnd-4_family-413	Unknown	704
MP_V2_GENOME_10083	1062	1116	+	AT_rich	Low_complexity	705
MP_V2_GENOME_10083	1121	1357	-	rnd-1_family-350	DNA/hAT-Ac	706
MP_V2_GENOME_10083	1363	2188	-	rnd-1_family-27	LTR/Gypsy	707
MP_V2_GENOME_10083	2205	2390	-	rnd-5_family-1857	Unknown	708
MP_V2_GENOME_10083	2257	2366	+	rnd-1_family-128	Unknown	709
MP_V2_GENOME_10083	2407	2427	+	(TA)n	Simple_repeat	710
MP_V2_GENOME_10083	2544	2936	+	rnd-4_family-753	Unknown	711
MP_V2_GENOME_10083	3075	3202	+	AT_rich	Low_complexity	712
MP_V2_GENOME_10083	3239	3311	+	AT_rich	Low_complexity	713
MP_V2_GENOME_10084	1	21	+	(TA)n	Simple_repeat	714
MP_V2_GENOME_10084	869	893	+	AT_rich	Low_complexity	715
MP_V2_GENOME_10084	871	895	+	AT_rich	Low_complexity	716
MP_V2_GENOME_10084	1080	1105	+	AT_rich	Low_complexity	717
MP_V2_GENOME_10084	1531	1569	+	(GGAGA)n	Simple_repeat	718
MP_V2_GENOME_10084	1939	1962	+	(TA)n	Simple_repeat	719
MP_V2_GENOME_10084	3018	3104	-	rnd-4_family-428	Unknown	720
MP_V2_GENOME_10084	3051	3110	+	rnd-1_family-18	Unknown	721
MP_V2_GENOME_10084	3089	3198	+	rnd-5_family-5283	Unknown	722
MP_V2_GENOME_10084	3100	3180	-	rnd-1_family-18	Unknown	723
MP_V2_GENOME_10084	3199	3224	+	(TA)n	Simple_repeat	724
MP_V2_GENOME_10084	3225	3249	+	rnd-5_family-5283	Unknown	722
MP_V2_GENOME_10084	3275	3849	+	rnd-5_family-7485	Unknown	725
MP_V2_GENOME_10084	3856	4693	-	rnd-1_family-248	Unknown	726
MP_V2_GENOME_10084	4697	5407	+	rnd-5_family-412	Unknown	727
MP_V2_GENOME_10084	5409	5645	-	rnd-1_family-397	Unknown	728
MP_V2_GENOME_10084	11242	11262	+	AT_rich	Low_complexity	729
MP_V2_GENOME_10084	17555	17577	+	AT_rich	Low_complexity	730
MP_V2_GENOME_10085	1	140	+	rnd-1_family-167	DNA/CMC-EnSpm	731
MP_V2_GENOME_10085	141	660	+	rnd-1_family-196	DNA/CMC-EnSpm	732
MP_V2_GENOME_10086	1	184	+	rnd-1_family-163	Unknown	733
MP_V2_GENOME_10087	1	132	-	rnd-5_family-701	Unknown	734
MP_V2_GENOME_10088	83	499	-	rnd-6_family-6251	Unknown	735
MP_V2_GENOME_10088	661	696	+	AT_rich	Low_complexity	736
MP_V2_GENOME_10088	892	921	+	(TTA)n	Simple_repeat	737
MP_V2_GENOME_10088	1034	1197	+	rnd-6_family-3668	Unknown	738
MP_V2_GENOME_10088	1317	1399	-	rnd-6_family-5119	Unknown	739
MP_V2_GENOME_10088	1579	2018	-	rnd-6_family-2009	Unknown	740
MP_V2_GENOME_10088	2010	2328	+	rnd-6_family-3110	Unknown	741
MP_V2_GENOME_10088	2329	2353	+	(TA)n	Simple_repeat	742
MP_V2_GENOME_10088	2354	2492	+	rnd-6_family-3110	Unknown	741
MP_V2_GENOME_10088	2477	3614	+	rnd-6_family-5119	Unknown	743
MP_V2_GENOME_10088	4647	4751	+	GA-rich	Low_complexity	744
MP_V2_GENOME_10088	5210	5393	+	GA-rich	Low_complexity	745
MP_V2_GENOME_10088	5627	5779	+	rnd-1_family-126	Unknown	746
MP_V2_GENOME_10088	5805	6545	-	rnd-4_family-2085	Unknown	747
MP_V2_GENOME_10088	6531	6704	-	rnd-4_family-2085	Unknown	748
MP_V2_GENOME_10088	6721	6877	-	rnd-1_family-126	Unknown	749
MP_V2_GENOME_10088	6967	7248	-	rnd-1_family-57	DNA/hAT-Ac	750
MP_V2_GENOME_10088	7327	7653	-	rnd-3_family-31	Unknown	751
MP_V2_GENOME_10088	7566	7669	+	rnd-6_family-65	LTR/Copia	752
MP_V2_GENOME_10089	3	335	+	rnd-3_family-31	Unknown	753
MP_V2_GENOME_10089	336	468	+	AT_rich	Low_complexity	754
MP_V2_GENOME_10089	592	738	+	rnd-5_family-1126	Unknown	755
MP_V2_GENOME_10089	745	878	+	AT_rich	Low_complexity	756
MP_V2_GENOME_10089	941	966	+	AT_rich	Low_complexity	757
MP_V2_GENOME_10089	1002	1068	+	AT_rich	Low_complexity	758
MP_V2_GENOME_10089	1947	2026	-	rnd-6_family-8996	Unknown	759
MP_V2_GENOME_10089	1959	2240	+	rnd-6_family-5204	Unknown	760
MP_V2_GENOME_1009	652	677	+	(TAAAAA)n	Simple_repeat	761
MP_V2_GENOME_1009	7847	8109	-	rnd-6_family-2863	Unknown	762
MP_V2_GENOME_1009	8182	8587	+	rnd-5_family-965	Unknown	763
MP_V2_GENOME_1009	8418	9281	-	rnd-6_family-2863	Unknown	764
MP_V2_GENOME_1009	14587	14758	+	AT_rich	Low_complexity	765
MP_V2_GENOME_1009	15047	15159	+	AT_rich	Low_complexity	766
MP_V2_GENOME_1009	20391	20514	+	rnd-3_family-181	Unknown	767
MP_V2_GENOME_1009	20589	20715	+	AT_rich	Low_complexity	768
MP_V2_GENOME_1009	23726	25488	-	rnd-5_family-4827	LTR/Copia	769
MP_V2_GENOME_1009	26755	26781	+	(A)n	Simple_repeat	770
MP_V2_GENOME_1009	27562	27674	+	rnd-3_family-1136	Unknown	771
MP_V2_GENOME_1009	27921	28177	+	rnd-4_family-58	Unknown	772
MP_V2_GENOME_1009	28940	28968	+	(TA)n	Simple_repeat	773
MP_V2_GENOME_1009	31137	31157	+	AT_rich	Low_complexity	774
MP_V2_GENOME_1009	31267	31369	+	AT_rich	Low_complexity	775
MP_V2_GENOME_1009	33872	33969	+	AT_rich	Low_complexity	776
MP_V2_GENOME_1009	34159	34357	+	rnd-5_family-2479	Unknown	777
MP_V2_GENOME_1009	34634	34910	+	rnd-6_family-2272	Unknown	778
MP_V2_GENOME_1009	35467	35561	+	rnd-4_family-335	LTR/Gypsy	779
MP_V2_GENOME_1009	35566	35846	+	rnd-1_family-275	LTR/Gypsy	780
MP_V2_GENOME_1009	36064	36516	+	rnd-1_family-230	LTR/Gypsy	781
MP_V2_GENOME_1009	36528	36789	+	rnd-4_family-1372	LTR/Gypsy	782
MP_V2_GENOME_1009	37076	37514	-	rnd-5_family-1503	DNA/hAT-Ac	783
MP_V2_GENOME_1009	37935	38294	-	rnd-5_family-52	DNA/hAT-Ac	784
MP_V2_GENOME_1009	38836	38927	+	rnd-6_family-4275	Unknown	785
MP_V2_GENOME_1009	39018	39405	+	rnd-6_family-4275	Unknown	785
MP_V2_GENOME_1009	39474	39515	+	(TAA)n	Simple_repeat	786
MP_V2_GENOME_1009	45269	45438	+	AT_rich	Low_complexity	787
MP_V2_GENOME_1009	47731	47779	-	rnd-6_family-6638	LINE/Penelope	788
MP_V2_GENOME_1009	48858	48894	+	(GA)n	Simple_repeat	789
MP_V2_GENOME_1009	49507	49635	-	rnd-1_family-83	Unknown	790
MP_V2_GENOME_1009	49627	49719	-	rnd-3_family-65	Unknown	791
MP_V2_GENOME_1009	49712	51020	-	rnd-6_family-11439	LTR/Copia	792
MP_V2_GENOME_1009	51023	52539	-	rnd-4_family-492	LTR/Copia	793
MP_V2_GENOME_1009	52543	52668	-	rnd-1_family-337	LTR/Copia	794
MP_V2_GENOME_10090	5699	5888	-	rnd-4_family-297	Unknown	795
MP_V2_GENOME_10090	7156	7270	+	rnd-5_family-2720	Unknown	796
MP_V2_GENOME_10090	7158	7292	-	rnd-5_family-4983	Unknown	797
MP_V2_GENOME_10090	7327	7420	+	rnd-4_family-413	Unknown	798
MP_V2_GENOME_10090	7436	7896	-	rnd-5_family-312	Unknown	799
MP_V2_GENOME_10090	7907	7993	+	rnd-4_family-413	Unknown	800
MP_V2_GENOME_10090	8084	8131	+	A-rich	Low_complexity	801
MP_V2_GENOME_10090	8280	8416	+	rnd-4_family-1305	Unknown	802
MP_V2_GENOME_10090	8503	8746	+	rnd-5_family-340	Unknown	803
MP_V2_GENOME_10090	8686	8872	-	rnd-4_family-58	Unknown	804
MP_V2_GENOME_10090	10246	10828	+	rnd-1_family-107	LTR/Gypsy	805
MP_V2_GENOME_10090	11708	12050	+	rnd-1_family-52	LTR/Gypsy	806
MP_V2_GENOME_10090	12220	12291	+	rnd-1_family-82	Unknown	807
MP_V2_GENOME_10090	12514	12704	+	rnd-1_family-95	Unknown	808
MP_V2_GENOME_10090	12712	12969	+	rnd-6_family-550	LTR/Copia	809
MP_V2_GENOME_10090	13396	13471	+	rnd-1_family-81	LTR/Copia	810
MP_V2_GENOME_10090	13568	13804	+	rnd-1_family-81	LTR/Copia	811
MP_V2_GENOME_10090	13859	14671	+	rnd-6_family-1232	Unknown	812
MP_V2_GENOME_10090	14621	14684	+	rnd-4_family-1606	LTR/Gypsy	813
MP_V2_GENOME_10090	15137	15258	+	rnd-1_family-264	LTR/Gypsy	814
MP_V2_GENOME_10090	15288	15539	+	rnd-1_family-230	LTR/Gypsy	815
MP_V2_GENOME_10090	15561	15758	+	rnd-4_family-1372	LTR/Gypsy	816
MP_V2_GENOME_10090	15775	15897	+	rnd-4_family-335	LTR/Gypsy	817
MP_V2_GENOME_10090	16915	17150	+	rnd-6_family-1232	Unknown	818
MP_V2_GENOME_10090	17149	17817	+	rnd-6_family-1232	Unknown	819
MP_V2_GENOME_10090	17815	17933	+	rnd-5_family-3784	Unknown	820
MP_V2_GENOME_10090	18749	18800	-	rnd-5_family-1659	LTR/Copia	821
MP_V2_GENOME_10090	18926	19587	-	rnd-5_family-1659	LTR/Copia	822
MP_V2_GENOME_10090	19599	20193	-	rnd-5_family-1659	LTR/Copia	821
MP_V2_GENOME_10090	20233	20282	+	AT_rich	Low_complexity	823
MP_V2_GENOME_10090	20296	21509	-	rnd-5_family-1659	LTR/Copia	821
MP_V2_GENOME_10090	21510	21610	+	AT_rich	Low_complexity	824
MP_V2_GENOME_10090	21958	22749	-	rnd-6_family-3300	Unknown	825
MP_V2_GENOME_10090	22756	23003	-	rnd-5_family-1656	LTR/Copia	826
MP_V2_GENOME_10090	23008	23193	-	rnd-5_family-929	Unknown	827
MP_V2_GENOME_10090	23255	23297	+	AT_rich	Low_complexity	828
MP_V2_GENOME_10091	1	168	+	rnd-6_family-9976	Unknown	829
MP_V2_GENOME_10091	521	545	+	AT_rich	Low_complexity	830
MP_V2_GENOME_10091	689	1210	-	rnd-6_family-9594	Unknown	831
MP_V2_GENOME_10092	1	87	+	rnd-5_family-1860	Unknown	832
MP_V2_GENOME_10093	1	44	-	rnd-4_family-2655	Unknown	833
MP_V2_GENOME_10093	48	114	-	rnd-1_family-163	Unknown	834
MP_V2_GENOME_10094	649	975	+	rnd-1_family-54	LTR/Copia	835
MP_V2_GENOME_10095	1	247	-	rnd-4_family-39	Unknown	836
MP_V2_GENOME_10095	266	435	+	rnd-5_family-3278	Unknown	837
MP_V2_GENOME_10096	26	56	+	AT_rich	Low_complexity	838
MP_V2_GENOME_10096	143	305	-	rnd-6_family-1441	Unknown	839
MP_V2_GENOME_10096	493	1295	-	rnd-5_family-2365	Unknown	840
MP_V2_GENOME_10097	4	413	+	rnd-5_family-750	DNA/hAT-Ac	841
MP_V2_GENOME_10098	1	113	-	rnd-4_family-1215	Unknown	842
MP_V2_GENOME_10099	1	174	+	rnd-1_family-15	Unknown	843
MP_V2_GENOME_101	542	684	+	AT_rich	Low_complexity	844
MP_V2_GENOME_101	697	790	+	rnd-6_family-5401	Unknown	845
MP_V2_GENOME_101	847	979	+	A-rich	Low_complexity	846
MP_V2_GENOME_101	1047	1117	+	AT_rich	Low_complexity	847
MP_V2_GENOME_101	1596	1682	+	(TTA)n	Simple_repeat	848
MP_V2_GENOME_101	2306	2332	+	AT_rich	Low_complexity	849
MP_V2_GENOME_101	2310	2361	+	AT_rich	Low_complexity	850
MP_V2_GENOME_101	2862	2904	+	AT_rich	Low_complexity	851
MP_V2_GENOME_101	3161	3190	+	(TTC)n	Simple_repeat	852
MP_V2_GENOME_1010	5	80	+	rnd-6_family-2627	Unknown	853
MP_V2_GENOME_1010	342	512	+	rnd-6_family-4675	Unknown	854
MP_V2_GENOME_1010	561	663	+	AT_rich	Low_complexity	855
MP_V2_GENOME_1010	743	787	+	AT_rich	Low_complexity	856
MP_V2_GENOME_1010	1250	1409	+	rnd-6_family-1958	Unknown	857
MP_V2_GENOME_1010	1252	1462	-	rnd-6_family-824	Unknown	858
MP_V2_GENOME_1010	1703	1957	+	rnd-6_family-13193	Unknown	859
MP_V2_GENOME_1010	1949	2774	-	rnd-1_family-27	LTR/Gypsy	860
MP_V2_GENOME_1010	2658	2978	+	rnd-1_family-128	Unknown	861
MP_V2_GENOME_1010	3153	3433	+	rnd-4_family-753	Unknown	862
MP_V2_GENOME_1010	3439	3543	+	rnd-6_family-13193	Unknown	863
MP_V2_GENOME_10100	1	262	-	rnd-1_family-47	Unknown	864
MP_V2_GENOME_10100	309	1295	+	rnd-5_family-603	LTR/Gypsy	865
MP_V2_GENOME_10100	1311	2325	+	rnd-5_family-714	LTR/Gypsy	866
MP_V2_GENOME_10100	2338	2713	+	rnd-5_family-714	LTR/Gypsy	867
MP_V2_GENOME_10101	1	416	-	rnd-6_family-446	DNA/P	868
MP_V2_GENOME_10101	151	594	+	rnd-3_family-31	Unknown	869
MP_V2_GENOME_10101	623	686	-	rnd-4_family-104	Unknown	870
MP_V2_GENOME_10101	778	802	+	AT_rich	Low_complexity	871
MP_V2_GENOME_10101	784	807	+	AT_rich	Low_complexity	872
MP_V2_GENOME_10101	1452	1785	+	rnd-4_family-320	Unknown	873
MP_V2_GENOME_10101	1815	1966	+	AT_rich	Low_complexity	874
MP_V2_GENOME_10101	2044	2177	+	rnd-6_family-5728	Unknown	875
MP_V2_GENOME_10101	2476	2595	+	AT_rich	Low_complexity	876
MP_V2_GENOME_10101	2754	3104	+	rnd-1_family-9	Unknown	877
MP_V2_GENOME_10101	2819	3152	-	rnd-1_family-2	Unknown	878
MP_V2_GENOME_10101	3319	3368	+	A-rich	Low_complexity	879
MP_V2_GENOME_10101	7509	7538	+	(TAG)n	Simple_repeat	880
MP_V2_GENOME_10101	10190	10240	+	A-rich	Low_complexity	881
MP_V2_GENOME_10101	10260	10397	+	rnd-6_family-15686	Unknown	882
MP_V2_GENOME_10101	10275	10474	-	rnd-5_family-690	Unknown	883
MP_V2_GENOME_10101	11377	11422	+	(GA)n	Simple_repeat	884
MP_V2_GENOME_10101	13695	14341	+	rnd-4_family-39	Unknown	885
MP_V2_GENOME_10101	14005	14227	-	rnd-5_family-5353	Unknown	886
MP_V2_GENOME_10101	14396	14763	+	rnd-4_family-58	Unknown	887
MP_V2_GENOME_10101	14860	15268	+	rnd-5_family-2479	Unknown	888
MP_V2_GENOME_10101	15827	15869	+	A-rich	Low_complexity	889
MP_V2_GENOME_10101	16098	16314	-	rnd-4_family-413	Unknown	890
MP_V2_GENOME_10101	16235	16330	+	rnd-6_family-65	LTR/Copia	891
MP_V2_GENOME_10101	16907	17146	+	rnd-3_family-36	Unknown	892
MP_V2_GENOME_10101	17209	17308	+	(TA)n	Simple_repeat	893
MP_V2_GENOME_10101	17403	17575	+	rnd-3_family-478	Unknown	894
MP_V2_GENOME_10101	17587	17931	+	rnd-3_family-478	Unknown	894
MP_V2_GENOME_10101	17862	17930	-	rnd-1_family-19	Unknown	895
MP_V2_GENOME_10101	18129	18219	+	rnd-5_family-929	Unknown	896
MP_V2_GENOME_10101	18581	18745	-	rnd-4_family-429	Unknown	897
MP_V2_GENOME_10101	18692	18912	+	rnd-6_family-5204	Unknown	898
MP_V2_GENOME_10103	1	105	-	rnd-1_family-87	LTR/Gypsy	899
MP_V2_GENOME_10105	4	135	-	rnd-4_family-1248	Unknown	900
MP_V2_GENOME_10106	3	190	-	rnd-6_family-895	Unknown	901
MP_V2_GENOME_10106	195	464	-	rnd-1_family-365	Unknown	902
MP_V2_GENOME_10107	1	1209	+	rnd-5_family-4827	LTR/Copia	903
MP_V2_GENOME_10107	1308	1433	-	rnd-3_family-1136	Unknown	904
MP_V2_GENOME_10107	1546	1906	-	rnd-4_family-753	Unknown	905
MP_V2_GENOME_10107	1967	2129	+	rnd-5_family-1857	Unknown	906
MP_V2_GENOME_10107	2012	2130	-	rnd-1_family-128	Unknown	907
MP_V2_GENOME_10107	2129	2371	+	rnd-1_family-103	Unknown	908
MP_V2_GENOME_10107	2202	2984	+	rnd-1_family-27	LTR/Gypsy	909
MP_V2_GENOME_10107	3112	3289	+	rnd-4_family-39	Unknown	910
MP_V2_GENOME_10107	3345	3479	+	rnd-4_family-204	Unknown	911
MP_V2_GENOME_10107	3447	3758	+	rnd-4_family-204	Unknown	912
MP_V2_GENOME_10107	3885	4028	+	rnd-6_family-20739	Unknown	913
MP_V2_GENOME_10107	4096	4308	+	rnd-4_family-492	LTR/Copia	914
MP_V2_GENOME_10107	4363	4486	+	rnd-1_family-92	LTR/Copia	915
MP_V2_GENOME_10107	4496	4582	+	rnd-5_family-255	LTR/Copia	916
MP_V2_GENOME_10107	4500	4594	+	rnd-5_family-3784	Unknown	917
MP_V2_GENOME_10107	4598	4893	+	rnd-5_family-255	LTR/Copia	916
MP_V2_GENOME_10107	5358	5988	+	rnd-6_family-5119	Unknown	918
MP_V2_GENOME_10107	6162	6423	-	rnd-5_family-312	Unknown	919
MP_V2_GENOME_10107	6483	6634	+	rnd-4_family-425	Unknown	920
MP_V2_GENOME_10107	6773	6865	+	rnd-6_family-5119	Unknown	921
MP_V2_GENOME_10107	7047	7254	+	rnd-5_family-623	Unknown	922
MP_V2_GENOME_10107	7255	7278	+	(TTA)n	Simple_repeat	923
MP_V2_GENOME_10107	7279	7337	+	rnd-5_family-623	Unknown	922
MP_V2_GENOME_10107	7515	7721	+	rnd-6_family-5119	Unknown	918
MP_V2_GENOME_10107	7828	8084	+	rnd-6_family-5119	Unknown	918
MP_V2_GENOME_10107	8718	8768	+	AT_rich	Low_complexity	924
MP_V2_GENOME_10107	8800	8834	+	(TA)n	Simple_repeat	925
MP_V2_GENOME_10107	9263	9350	-	rnd-6_family-625	Unknown	926
MP_V2_GENOME_10107	9775	9989	-	rnd-6_family-7445	Unknown	927
MP_V2_GENOME_10107	9991	10211	-	rnd-6_family-3668	Unknown	928
MP_V2_GENOME_10107	10886	10965	+	AT_rich	Low_complexity	929
MP_V2_GENOME_10107	11208	11451	-	rnd-1_family-62	Unknown	930
MP_V2_GENOME_10107	11452	11491	+	AT_rich	Low_complexity	931
MP_V2_GENOME_10107	11674	12021	+	rnd-1_family-2	Unknown	932
MP_V2_GENOME_10107	11724	12100	-	rnd-1_family-9	Unknown	933
MP_V2_GENOME_10107	12236	12279	+	rnd-6_family-3741	Unknown	934
MP_V2_GENOME_10107	12280	12738	-	rnd-6_family-7464	LINE/L1	935
MP_V2_GENOME_10107	12739	13323	+	rnd-6_family-3741	Unknown	934
MP_V2_GENOME_10107	13144	13948	-	rnd-4_family-359	LINE/L1	936
MP_V2_GENOME_10107	13949	15348	+	rnd-1_family-61	LTR/Copia	937
MP_V2_GENOME_10107	15359	16344	+	rnd-1_family-97	LTR/Copia	938
MP_V2_GENOME_10108	105	1176	-	rnd-1_family-176	DNA/CMC-EnSpm	939
MP_V2_GENOME_10108	1178	1321	-	rnd-6_family-3163	DNA/CMC-EnSpm	940
MP_V2_GENOME_10109	2	204	+	rnd-1_family-27	LTR/Gypsy	941
MP_V2_GENOME_10109	229	412	+	rnd-1_family-27	LTR/Gypsy	941
MP_V2_GENOME_1011	1	158	-	rnd-4_family-1105	Unknown	942
MP_V2_GENOME_1011	243	285	+	rnd-1_family-283	Unknown	943
256	2136	-1884	rnd-6_family-2863	Unknown	1
MP_V2_GENOME_10111	1	342	-	rnd-6_family-446	DNA/P	945
MP_V2_GENOME_10111	61	388	+	rnd-3_family-31	Unknown	946
MP_V2_GENOME_10111	460	484	+	AT_rich	Low_complexity	947
MP_V2_GENOME_10111	1477	1512	+	AT_rich	Low_complexity	948
MP_V2_GENOME_10111	1590	1615	+	(TA)n	Simple_repeat	949
MP_V2_GENOME_10111	1679	1715	+	(GAA)n	Simple_repeat	950
MP_V2_GENOME_10112	1	499	+	rnd-5_family-720	Unknown	951
MP_V2_GENOME_10112	470	649	+	rnd-5_family-720	Unknown	951
MP_V2_GENOME_10113	6	89	-	rnd-1_family-357	LTR/Gypsy	952
MP_V2_GENOME_10114	1	1055	-	rnd-5_family-662	LTR/Copia	953
MP_V2_GENOME_10114	1053	1108	-	rnd-5_family-662	LTR/Copia	953
MP_V2_GENOME_10114	1105	1279	-	rnd-4_family-1456	LTR/Copia	954
MP_V2_GENOME_10114	4518	4565	-	rnd-1_family-80	DNA/PIF-Harbinger	955
MP_V2_GENOME_10114	4577	4633	+	AT_rich	Low_complexity	956
MP_V2_GENOME_10114	4615	4635	+	AT_rich	Low_complexity	957
MP_V2_GENOME_10114	4662	4684	+	AT_rich	Low_complexity	958
MP_V2_GENOME_10114	4866	4912	+	AT_rich	Low_complexity	959
MP_V2_GENOME_10114	4919	5021	+	rnd-1_family-144	Unknown	960
MP_V2_GENOME_10114	5026	5345	+	rnd-4_family-564	Unknown	961
MP_V2_GENOME_10115	2249	2271	+	AT_rich	Low_complexity	962
MP_V2_GENOME_10115	3133	3163	+	AT_rich	Low_complexity	963
MP_V2_GENOME_10115	3271	3290	+	(TA)n	Simple_repeat	964
MP_V2_GENOME_10115	3647	3667	+	(TA)n	Simple_repeat	965
MP_V2_GENOME_10115	4124	4149	+	AT_rich	Low_complexity	966
MP_V2_GENOME_10115	4300	4328	+	(TA)n	Simple_repeat	967
MP_V2_GENOME_10115	4475	4498	+	AT_rich	Low_complexity	968
MP_V2_GENOME_10115	7857	7910	+	T-rich	Low_complexity	969
MP_V2_GENOME_10115	9332	9352	+	(TTATA)n	Simple_repeat	970
MP_V2_GENOME_10115	9833	9860	+	AT_rich	Low_complexity	971
MP_V2_GENOME_10115	9911	9931	+	(CA)n	Simple_repeat	972
MP_V2_GENOME_10115	10142	10168	+	AT_rich	Low_complexity	973
MP_V2_GENOME_10115	10169	10201	+	(GAAAA)n	Simple_repeat	974
MP_V2_GENOME_10115	10271	10308	+	AT_rich	Low_complexity	975
MP_V2_GENOME_10115	10804	10826	+	AT_rich	Low_complexity	976
MP_V2_GENOME_10116	1	169	+	rnd-5_family-22	Unknown	977
MP_V2_GENOME_10116	309	359	+	AT_rich	Low_complexity	978
MP_V2_GENOME_10116	1591	1613	+	AT_rich	Low_complexity	979
MP_V2_GENOME_10116	2275	2303	+	(TAA)n	Simple_repeat	980
MP_V2_GENOME_10116	2625	2644	+	(TTAA)n	Simple_repeat	981
MP_V2_GENOME_10116	3525	3576	+	(CCA)n	Simple_repeat	982
MP_V2_GENOME_10117	1	105	-	rnd-5_family-720	Unknown	983
MP_V2_GENOME_10117	76	868	-	rnd-5_family-720	Unknown	983
MP_V2_GENOME_10118	1	20	+	(TAAA)n	Simple_repeat	984
MP_V2_GENOME_10118	287	369	+	AT_rich	Low_complexity	985
MP_V2_GENOME_10118	543	669	+	AT_rich	Low_complexity	986
MP_V2_GENOME_10119	1	715	-	rnd-6_family-4905	DNA/hAT-Ac	987
MP_V2_GENOME_10119	740	769	+	AT_rich	Low_complexity	988
MP_V2_GENOME_10119	944	971	+	AT_rich	Low_complexity	989
MP_V2_GENOME_10119	1298	1544	-	rnd-5_family-690	Unknown	990
MP_V2_GENOME_10119	1521	1742	+	rnd-6_family-625	Unknown	991
MP_V2_GENOME_10119	1624	1777	-	rnd-6_family-15686	Unknown	992
MP_V2_GENOME_10119	3897	3997	+	rnd-6_family-9547	Unknown	993
MP_V2_GENOME_1012	1	97	+	rnd-1_family-57	DNA/hAT-Ac	994
MP_V2_GENOME_10120	1	1202	+	rnd-1_family-5	LTR/Gypsy	995
MP_V2_GENOME_10121	1	953	-	rnd-5_family-2725	Unknown	996
MP_V2_GENOME_10122	1	1555	-	rnd-1_family-392	LTR/Gypsy	997
MP_V2_GENOME_10122	1557	1604	+	rnd-5_family-2158	Unknown	998
MP_V2_GENOME_10122	1607	2693	+	rnd-1_family-283	Unknown	999
MP_V2_GENOME_10122	2690	3827	+	rnd-1_family-11	Unknown	1000
MP_V2_GENOME_10122	3488	4052	-	rnd-1_family-55	Unknown	1001
MP_V2_GENOME_10122	4089	4125	+	(TA)n	Simple_repeat	1002
MP_V2_GENOME_10122	4204	4440	-	rnd-5_family-3390	Unknown	1003
MP_V2_GENOME_10122	4375	4840	+	rnd-3_family-74	Unknown	1004
MP_V2_GENOME_10123	1	207	-	rnd-1_family-87	LTR/Gypsy	1005
MP_V2_GENOME_10124	2712	2989	+	rnd-4_family-465	LTR/Copia	1006
MP_V2_GENOME_10124	5366	6923	+	rnd-1_family-46	DNA/MULE-MuDR	1007
MP_V2_GENOME_10125	1	90	-	rnd-5_family-6376	Unknown	1008
MP_V2_GENOME_10125	92	238	-	rnd-5_family-6376	Unknown	1008
MP_V2_GENOME_10125	608	670	-	rnd-5_family-6376	Unknown	1009
MP_V2_GENOME_10125	688	794	+	rnd-4_family-163	Unknown	1010
MP_V2_GENOME_10125	1573	1666	+	AT_rich	Low_complexity	1011
MP_V2_GENOME_10125	1803	1845	+	AT_rich	Low_complexity	1012
MP_V2_GENOME_10125	2063	2148	+	AT_rich	Low_complexity	1013
MP_V2_GENOME_10125	2357	2410	+	AT_rich	Low_complexity	1014
MP_V2_GENOME_10125	2932	3259	+	rnd-5_family-4874	Unknown	1015
MP_V2_GENOME_10125	3260	3438	+	rnd-6_family-6131	LTR/Gypsy	1016
MP_V2_GENOME_10125	3441	3496	+	rnd-6_family-6131	LTR/Gypsy	1016
MP_V2_GENOME_10125	4258	4462	+	rnd-6_family-5190	Unknown	1017
MP_V2_GENOME_10126	1	357	-	rnd-5_family-3857	Unknown	1018
MP_V2_GENOME_10126	595	695	-	rnd-6_family-3616	Unknown	1019
MP_V2_GENOME_10126	2475	2507	+	A-rich	Low_complexity	1020
MP_V2_GENOME_10126	3356	3402	+	(TATATG)n	Simple_repeat	1021
MP_V2_GENOME_10126	3783	3859	+	AT_rich	Low_complexity	1022
MP_V2_GENOME_10126	5161	5225	+	AT_rich	Low_complexity	1023
MP_V2_GENOME_10126	5500	5522	+	(TAAA)n	Simple_repeat	1024
MP_V2_GENOME_10126	5893	5959	+	AT_rich	Low_complexity	1025
MP_V2_GENOME_10126	6154	6202	+	AT_rich	Low_complexity	1026
MP_V2_GENOME_10126	7216	7238	+	AT_rich	Low_complexity	1027
MP_V2_GENOME_10126	7325	7716	-	rnd-5_family-58	Unknown	1028
MP_V2_GENOME_10126	7421	7658	+	rnd-4_family-429	Unknown	1029
MP_V2_GENOME_10126	7932	7974	+	AT_rich	Low_complexity	1030
MP_V2_GENOME_10126	8338	8563	-	rnd-3_family-341	Unknown	1031
MP_V2_GENOME_10126	8585	8652	+	AT_rich	Low_complexity	1032
MP_V2_GENOME_10126	8669	8780	-	rnd-3_family-49	Unknown	1033
MP_V2_GENOME_10127	866	1556	+	rnd-6_family-2863	Unknown	1034
MP_V2_GENOME_10127	5449	5494	+	(TGG)n	Simple_repeat	1035
MP_V2_GENOME_10128	3	301	-	rnd-1_family-106	LTR/Copia	1036
MP_V2_GENOME_10128	302	579	-	rnd-4_family-108	LTR/Copia	1037
MP_V2_GENOME_10128	587	793	-	rnd-1_family-29	LTR/Copia	1038
MP_V2_GENOME_10128	822	878	-	rnd-5_family-5283	Unknown	1039
MP_V2_GENOME_10128	879	900	+	(TA)n	Simple_repeat	1040
MP_V2_GENOME_10128	901	1030	-	rnd-6_family-3937	Unknown	1039
MP_V2_GENOME_10128	925	1009	+	rnd-1_family-18	Unknown	1041
MP_V2_GENOME_10129	1	199	+	rnd-5_family-1253	LTR/Gypsy	1042
MP_V2_GENOME_10129	181	324	+	rnd-5_family-1253	LTR/Gypsy	1042
MP_V2_GENOME_10129	337	1012	+	rnd-5_family-1253	LTR/Gypsy	1043
MP_V2_GENOME_10129	1007	1319	+	rnd-5_family-1253	LTR/Gypsy	1044
MP_V2_GENOME_10129	1279	1852	+	rnd-1_family-13	Unknown	1045
MP_V2_GENOME_1013	1	1230	+	rnd-1_family-20	LTR/Copia	1046
MP_V2_GENOME_10131	1	239	-	rnd-6_family-237	Unknown	1047
MP_V2_GENOME_10131	258	472	+	rnd-6_family-8263	LINE/L1	1048
MP_V2_GENOME_10131	851	1142	-	rnd-5_family-1958	Unknown	1049
MP_V2_GENOME_10131	1410	1432	+	AT_rich	Low_complexity	1050
MP_V2_GENOME_10131	1458	1984	+	rnd-5_family-9683	Unknown	1051
MP_V2_GENOME_10131	2462	2485	+	AT_rich	Low_complexity	1052
MP_V2_GENOME_10131	2529	2696	-	rnd-5_family-1602	Unknown	1053
MP_V2_GENOME_10132	257	322	-	rnd-6_family-12300	Unknown	1054
MP_V2_GENOME_10132	534	561	+	AT_rich	Low_complexity	1055
MP_V2_GENOME_10132	609	708	+	AT_rich	Low_complexity	1056
MP_V2_GENOME_10133	1	115	-	rnd-1_family-9	Unknown	1057
MP_V2_GENOME_10133	544	838	+	rnd-4_family-39	Unknown	1058
MP_V2_GENOME_10134	109	445	+	rnd-6_family-9732	Unknown	1059
MP_V2_GENOME_10134	3380	3544	+	rnd-5_family-1602	Unknown	1060
MP_V2_GENOME_10134	6084	6104	+	(TA)n	Simple_repeat	1061
MP_V2_GENOME_10135	3672	3751	+	AT_rich	Low_complexity	1062
MP_V2_GENOME_10135	4583	5872	+	rnd-5_family-1295	DNA/MULE-MuDR	1063
MP_V2_GENOME_10135	6743	6762	+	(TTAA)n	Simple_repeat	1064
MP_V2_GENOME_10135	7046	7186	+	AT_rich	Low_complexity	1065
MP_V2_GENOME_10135	8299	8348	+	AT_rich	Low_complexity	1066
MP_V2_GENOME_10135	8421	8570	-	rnd-6_family-10993	LTR/Copia	1067
MP_V2_GENOME_10135	8634	8660	+	(TAAA)n	Simple_repeat	1068
MP_V2_GENOME_10135	15883	15909	+	(TA)n	Simple_repeat	1069
MP_V2_GENOME_10135	16010	16029	+	(GA)n	Simple_repeat	1070
MP_V2_GENOME_10135	16137	16340	+	rnd-4_family-413	Unknown	1071
MP_V2_GENOME_10135	16664	16686	+	(CAG)n	Simple_repeat	1072
MP_V2_GENOME_10135	17793	17816	+	AT_rich	Low_complexity	1073
MP_V2_GENOME_10135	17934	18046	-	rnd-6_family-11087	Unknown	1074
MP_V2_GENOME_10135	18273	18323	+	(TA)n	Simple_repeat	1075
MP_V2_GENOME_10135	18408	18479	+	rnd-3_family-181	Unknown	1076
MP_V2_GENOME_10135	19602	19641	+	(TTC)n	Simple_repeat	1077
MP_V2_GENOME_10135	19883	20040	-	rnd-6_family-152	DNA/PIF-Harbinger	1078
MP_V2_GENOME_10135	20041	20067	-	rnd-5_family-425	Unknown	1079
MP_V2_GENOME_10135	20479	20533	+	AT_rich	Low_complexity	1080
MP_V2_GENOME_10135	21394	21442	+	AT_rich	Low_complexity	1081
MP_V2_GENOME_10135	22018	22144	-	rnd-6_family-8996	Unknown	1082
MP_V2_GENOME_10135	22032	22283	+	rnd-6_family-2009	Unknown	1083
MP_V2_GENOME_10136	582	694	+	AT_rich	Low_complexity	1084
MP_V2_GENOME_10136	695	919	+	rnd-5_family-405	Unknown	1085
MP_V2_GENOME_10136	953	1176	+	rnd-4_family-235	Unknown	1086
MP_V2_GENOME_10136	1177	1202	+	(TA)n	Simple_repeat	1087
MP_V2_GENOME_10136	3810	4081	-	rnd-4_family-96	Unknown	1088
MP_V2_GENOME_10136	4904	5447	+	rnd-3_family-36	Unknown	1089
MP_V2_GENOME_10136	5449	5603	+	rnd-6_family-9796	DNA/MULE-MuDR	1090
MP_V2_GENOME_10136	5652	6024	+	rnd-1_family-57	DNA/hAT-Ac	1091
MP_V2_GENOME_10136	6023	6167	+	rnd-6_family-9796	DNA/MULE-MuDR	1092
MP_V2_GENOME_10136	6029	6206	+	rnd-6_family-4905	DNA/hAT-Ac	1093
MP_V2_GENOME_10136	6220	6302	+	rnd-4_family-96	Unknown	1094
MP_V2_GENOME_10136	7336	8246	-	rnd-6_family-9541	Unknown	1095
MP_V2_GENOME_10136	8359	8467	+	rnd-1_family-142	Unknown	1096
MP_V2_GENOME_10136	8533	8829	-	rnd-5_family-2479	Unknown	1097
MP_V2_GENOME_10136	8955	9040	+	AT_rich	Low_complexity	1098
MP_V2_GENOME_10136	16920	16942	+	AT_rich	Low_complexity	1099
MP_V2_GENOME_10136	18322	18342	+	AT_rich	Low_complexity	1100
MP_V2_GENOME_10136	18564	18673	-	rnd-5_family-1764	LTR/ERV1	1101
MP_V2_GENOME_10136	18569	18685	-	rnd-5_family-2331	Unknown	1102
MP_V2_GENOME_10136	24560	24659	+	AT_rich	Low_complexity	1103
MP_V2_GENOME_10136	25127	25224	-	rnd-5_family-5187	Unknown	1104
MP_V2_GENOME_10136	25301	27428	-	rnd-1_family-24	LTR/Gypsy	1105
MP_V2_GENOME_10136	27496	27925	-	rnd-1_family-64	LTR/Gypsy	1106
MP_V2_GENOME_10136	27955	28804	-	rnd-1_family-240	LTR/Gypsy	1107
MP_V2_GENOME_10136	28820	29952	-	rnd-1_family-161	LTR/Gypsy	1108
MP_V2_GENOME_10136	29953	30001	-	rnd-1_family-117	Unknown	1109
MP_V2_GENOME_10136	30093	30189	+	AT_rich	Low_complexity	1110
MP_V2_GENOME_10136	30204	30269	-	rnd-1_family-93	Unknown	1111
MP_V2_GENOME_10136	38012	38172	+	rnd-6_family-1471	Unknown	1112
MP_V2_GENOME_10136	38311	38359	+	AT_rich	Low_complexity	1113
MP_V2_GENOME_10136	49350	49390	+	rnd-1_family-215	Unknown	1114
MP_V2_GENOME_10137	1	607	+	rnd-4_family-1215	Unknown	1115
MP_V2_GENOME_10137	608	630	+	(TTA)n	Simple_repeat	1116
MP_V2_GENOME_10137	631	756	+	rnd-4_family-1215	Unknown	1115
MP_V2_GENOME_10138	298	348	+	AT_rich	Low_complexity	1117
MP_V2_GENOME_10139	38	90	+	AT_rich	Low_complexity	1118
MP_V2_GENOME_10139	967	988	+	(TTTTTG)n	Simple_repeat	1119
MP_V2_GENOME_10139	8070	8187	+	AT_rich	Low_complexity	1120
MP_V2_GENOME_10139	8726	8798	+	AT_rich	Low_complexity	1121
MP_V2_GENOME_1014	244	279	+	AT_rich	Low_complexity	1122
MP_V2_GENOME_1014	379	436	+	AT_rich	Low_complexity	1123
MP_V2_GENOME_1014	444	478	+	AT_rich	Low_complexity	1124
MP_V2_GENOME_10140	369	404	+	AT_rich	Low_complexity	1125
MP_V2_GENOME_10140	1027	1203	+	rnd-6_family-9796	DNA/MULE-MuDR	1126
MP_V2_GENOME_10140	1346	1428	+	rnd-5_family-1436	Unknown	1127
MP_V2_GENOME_10140	1685	2087	-	rnd-5_family-9075	Unknown	1128
MP_V2_GENOME_10140	2019	2124	+	rnd-5_family-1027	Unknown	1129
MP_V2_GENOME_10140	2158	2349	-	rnd-6_family-941	Unknown	1130
MP_V2_GENOME_10140	2199	2540	+	rnd-5_family-425	Unknown	1131
MP_V2_GENOME_10140	2531	2700	-	rnd-3_family-478	Unknown	1132
MP_V2_GENOME_10140	2560	2688	+	rnd-4_family-163	Unknown	1133
MP_V2_GENOME_10140	2685	2755	+	rnd-6_family-6221	LINE/Jockey	1134
MP_V2_GENOME_10140	2784	2933	-	rnd-3_family-478	Unknown	1135
MP_V2_GENOME_10140	2952	3071	-	rnd-6_family-941	Unknown	1130
MP_V2_GENOME_10140	3088	3113	+	AT_rich	Low_complexity	1136
MP_V2_GENOME_10140	3301	3680	-	rnd-6_family-26319	LTR/Gypsy	1137
MP_V2_GENOME_10140	3821	3870	+	AT_rich	Low_complexity	1138
MP_V2_GENOME_10140	3929	4369	+	rnd-6_family-11594	Unknown	1139
MP_V2_GENOME_10140	4408	5197	-	rnd-1_family-27	LTR/Gypsy	1140
MP_V2_GENOME_10140	5198	5273	-	rnd-1_family-103	Unknown	1141
MP_V2_GENOME_10140	5252	5518	-	rnd-5_family-1857	Unknown	1142
MP_V2_GENOME_10140	5492	5874	+	rnd-4_family-753	Unknown	1143
MP_V2_GENOME_10140	6411	6603	+	rnd-6_family-11594	Unknown	1144
MP_V2_GENOME_10141	1	218	+	rnd-4_family-492	LTR/Copia	1145
MP_V2_GENOME_10141	230	475	+	rnd-4_family-492	LTR/Copia	1146
MP_V2_GENOME_10141	493	781	+	rnd-4_family-492	LTR/Copia	1146
MP_V2_GENOME_10141	774	1768	+	rnd-4_family-492	LTR/Copia	1147
MP_V2_GENOME_10141	1771	1894	+	rnd-1_family-42	LTR/Copia	1148
MP_V2_GENOME_10142	249	358	+	rnd-5_family-1503	DNA/hAT-Ac	1149
MP_V2_GENOME_10142	719	858	+	rnd-5_family-599	Unknown	1150
MP_V2_GENOME_10142	838	1243	-	rnd-1_family-57	DNA/hAT-Ac	1151
MP_V2_GENOME_10142	1488	1633	+	rnd-5_family-599	Unknown	1152
MP_V2_GENOME_10142	1655	2077	-	rnd-1_family-57	DNA/hAT-Ac	1153
MP_V2_GENOME_10142	2087	2308	+	rnd-5_family-599	Unknown	1154
MP_V2_GENOME_10142	2570	2615	+	T-rich	Low_complexity	1155
MP_V2_GENOME_10142	5350	6085	-	rnd-6_family-10961	Unknown	1156
MP_V2_GENOME_10142	6246	6442	-	rnd-6_family-10961	Unknown	1156
MP_V2_GENOME_10142	7011	7103	+	AT_rich	Low_complexity	1157
MP_V2_GENOME_10142	7128	7205	+	AT_rich	Low_complexity	1158
MP_V2_GENOME_10142	7606	7686	+	AT_rich	Low_complexity	1159
MP_V2_GENOME_10142	7918	7985	+	AT_rich	Low_complexity	1160
MP_V2_GENOME_10142	8969	9461	+	rnd-1_family-182	LTR/Gypsy	1161
MP_V2_GENOME_10142	9384	9571	+	rnd-1_family-243	Unknown	1162
MP_V2_GENOME_10142	9796	10793	-	rnd-6_family-10961	Unknown	1163
MP_V2_GENOME_10142	11309	11547	+	rnd-6_family-6281	Unknown	1164
MP_V2_GENOME_10142	11498	11553	-	rnd-1_family-19	Unknown	1165
MP_V2_GENOME_10142	12088	12443	+	rnd-6_family-735	Unknown	1166
MP_V2_GENOME_10142	12260	12750	-	rnd-6_family-6251	Unknown	1167
MP_V2_GENOME_10142	12755	12840	-	rnd-1_family-41	Unknown	1168
MP_V2_GENOME_10142	12774	12855	+	rnd-6_family-7283	Unknown	1169
MP_V2_GENOME_10142	13073	13094	+	AT_rich	Low_complexity	1170
MP_V2_GENOME_10142	14218	15268	-	rnd-6_family-10961	Unknown	1171
MP_V2_GENOME_10142	16499	16525	+	GC_rich	Low_complexity	1172
MP_V2_GENOME_10142	17452	18879	-	rnd-6_family-10961	Unknown	1173
MP_V2_GENOME_10142	18908	18927	+	(TA)n	Simple_repeat	1174
MP_V2_GENOME_10142	20780	21814	-	rnd-6_family-10961	Unknown	1175
MP_V2_GENOME_10142	22017	22049	+	(TTA)n	Simple_repeat	1176
MP_V2_GENOME_10142	22111	22449	-	rnd-4_family-753	Unknown	1177
MP_V2_GENOME_10142	22426	22710	+	rnd-5_family-1857	Unknown	1178
MP_V2_GENOME_10142	22550	22667	-	rnd-1_family-128	Unknown	1179
MP_V2_GENOME_10142	22730	23564	+	rnd-1_family-27	LTR/Gypsy	1180
MP_V2_GENOME_10142	26673	26774	-	rnd-6_family-1444	LTR/Copia	1181
MP_V2_GENOME_10142	27253	27343	-	rnd-1_family-428	LTR/Gypsy	1182
MP_V2_GENOME_10142	28016	28177	-	rnd-3_family-240	Unknown	1183
MP_V2_GENOME_10142	30077	30101	+	(TA)n	Simple_repeat	1184
MP_V2_GENOME_10142	32797	32848	+	A-rich	Low_complexity	1185
MP_V2_GENOME_10142	36238	36267	+	(TA)n	Simple_repeat	1186
MP_V2_GENOME_10142	37444	37469	+	AT_rich	Low_complexity	1187
MP_V2_GENOME_10142	38702	38726	+	(TA)n	Simple_repeat	1188
MP_V2_GENOME_10142	39745	39776	+	T-rich	Low_complexity	1189
MP_V2_GENOME_10142	42339	42371	+	(GA)n	Simple_repeat	1190
MP_V2_GENOME_10142	42626	42665	+	GA-rich	Low_complexity	1191
MP_V2_GENOME_10142	44328	44355	+	(TAAAA)n	Simple_repeat	1192
MP_V2_GENOME_10142	45811	45977	+	AT_rich	Low_complexity	1193
MP_V2_GENOME_10142	46930	46950	+	(TA)n	Simple_repeat	1194
MP_V2_GENOME_10142	47467	47500	+	A-rich	Low_complexity	1195
MP_V2_GENOME_10142	49313	49367	+	AT_rich	Low_complexity	1196
MP_V2_GENOME_10142	53934	53977	+	(T)n	Simple_repeat	1197
MP_V2_GENOME_10142	54996	55108	+	rnd-4_family-313	Unknown	1198
MP_V2_GENOME_10142	55775	55797	+	(TTAA)n	Simple_repeat	1199
MP_V2_GENOME_10142	55855	55880	+	AT_rich	Low_complexity	1200
MP_V2_GENOME_10142	56149	56206	+	AT_rich	Low_complexity	1201
MP_V2_GENOME_10142	56278	56395	+	rnd-5_family-1092	Unknown	1202
MP_V2_GENOME_10142	56407	56512	+	AT_rich	Low_complexity	1203
MP_V2_GENOME_10142	56957	57090	-	rnd-3_family-36	Unknown	1204
MP_V2_GENOME_10142	57580	57601	+	AT_rich	Low_complexity	1205
MP_V2_GENOME_10142	57583	57706	+	AT_rich	Low_complexity	1206
MP_V2_GENOME_10142	60227	60354	+	rnd-5_family-2720	Unknown	1207
MP_V2_GENOME_10142	60443	60650	-	rnd-5_family-4983	Unknown	1208
MP_V2_GENOME_10142	65441	65608	-	rnd-3_family-31	Unknown	1209
MP_V2_GENOME_10142	65458	65881	+	rnd-6_family-446	DNA/P	1210
MP_V2_GENOME_10142	65711	66352	-	rnd-5_family-66	Unknown	1211
MP_V2_GENOME_10142	66045	66528	-	rnd-6_family-446	DNA/P	1212
MP_V2_GENOME_10142	66631	66773	+	rnd-6_family-3937	Unknown	1213
MP_V2_GENOME_10142	67238	67289	+	AT_rich	Low_complexity	1214
MP_V2_GENOME_10143	1267	1392	-	rnd-1_family-354	LTR/Copia	1215
MP_V2_GENOME_10144	1	101	-	rnd-3_family-101	Unknown	1216
MP_V2_GENOME_10145	1593	1618	+	AT_rich	Low_complexity	1217
MP_V2_GENOME_10146	1	52	-	rnd-5_family-1031	LTR/Gypsy	1218
MP_V2_GENOME_10147	2	115	+	rnd-1_family-424	LTR/Gypsy	1219
MP_V2_GENOME_10147	119	515	+	rnd-5_family-1220	LTR/Gypsy	1220
MP_V2_GENOME_10147	649	1257	+	rnd-1_family-39	LTR/Gypsy	1221
MP_V2_GENOME_10147	1289	2410	-	rnd-1_family-40	LTR/Gypsy	1222
MP_V2_GENOME_10147	2436	2539	-	rnd-1_family-330	LTR/Gypsy	1223
MP_V2_GENOME_10148	261	321	+	AT_rich	Low_complexity	1224
MP_V2_GENOME_10148	769	824	+	AT_rich	Low_complexity	1225
MP_V2_GENOME_10148	958	992	+	AT_rich	Low_complexity	1226
MP_V2_GENOME_10148	1038	1136	-	rnd-3_family-181	Unknown	1227
MP_V2_GENOME_10148	1394	1460	+	AT_rich	Low_complexity	1228
MP_V2_GENOME_10148	1809	1870	+	AT_rich	Low_complexity	1229
MP_V2_GENOME_10148	1874	2020	+	rnd-5_family-6024	Unknown	1230
MP_V2_GENOME_10148	2049	2071	+	AT_rich	Low_complexity	1231
MP_V2_GENOME_10148	2270	2305	+	AT_rich	Low_complexity	1232
MP_V2_GENOME_10148	2417	2442	+	(TAA)n	Simple_repeat	1233
MP_V2_GENOME_10148	2929	3022	+	AT_rich	Low_complexity	1234
MP_V2_GENOME_10148	3023	3086	-	rnd-3_family-181	Unknown	1235
MP_V2_GENOME_10148	3397	3526	+	AT_rich	Low_complexity	1236
MP_V2_GENOME_10148	3761	3799	+	AT_rich	Low_complexity	1237
MP_V2_GENOME_10148	3812	3946	-	rnd-3_family-181	Unknown	1238
MP_V2_GENOME_10148	5942	5963	+	AT_rich	Low_complexity	1239
MP_V2_GENOME_10148	6012	6053	+	AT_rich	Low_complexity	1240
MP_V2_GENOME_10149	20	160	+	rnd-6_family-47	Unknown	1241
MP_V2_GENOME_10149	61	193	-	rnd-6_family-2272	Unknown	1242
MP_V2_GENOME_10149	572	652	+	AT_rich	Low_complexity	1243
MP_V2_GENOME_10149	780	800	+	AT_rich	Low_complexity	1244
MP_V2_GENOME_10149	1012	1061	+	AT_rich	Low_complexity	1245
MP_V2_GENOME_10149	1270	1293	+	AT_rich	Low_complexity	1246
MP_V2_GENOME_10149	1534	1581	+	AT_rich	Low_complexity	1247
MP_V2_GENOME_10149	1722	1873	-	rnd-5_family-1785	LTR/Caulimovirus	1248
MP_V2_GENOME_10149	1942	1976	+	AT_rich	Low_complexity	1249
MP_V2_GENOME_1015	284	536	+	rnd-6_family-3668	Unknown	1250
MP_V2_GENOME_1015	536	617	+	rnd-4_family-413	Unknown	1251
MP_V2_GENOME_1015	834	871	+	AT_rich	Low_complexity	1252
MP_V2_GENOME_1015	872	947	+	rnd-4_family-413	Unknown	1253
MP_V2_GENOME_1015	1047	1088	-	rnd-6_family-6	Unknown	1254
MP_V2_GENOME_1015	1150	1381	+	rnd-5_family-3278	Unknown	1255
MP_V2_GENOME_1015	1418	1442	+	AT_rich	Low_complexity	1256
MP_V2_GENOME_1015	1420	1460	+	AT_rich	Low_complexity	1257
MP_V2_GENOME_10150	3013	3098	-	rnd-6_family-5540	Unknown	1258
MP_V2_GENOME_10150	3843	5489	+	rnd-5_family-965	Unknown	1259
MP_V2_GENOME_10150	5725	5816	-	rnd-4_family-413	Unknown	1260
MP_V2_GENOME_10150	6895	6944	+	rnd-4_family-413	Unknown	1261
MP_V2_GENOME_10150	15275	15741	+	rnd-6_family-1348	Unknown	1262
MP_V2_GENOME_10150	15748	16014	+	rnd-6_family-1348	Unknown	1263
MP_V2_GENOME_10150	16599	16688	+	(TG)n	Simple_repeat	1264
MP_V2_GENOME_10150	18305	18338	+	(TA)n	Simple_repeat	1265
MP_V2_GENOME_10150	19686	19705	+	(TA)n	Simple_repeat	1266
MP_V2_GENOME_10150	20480	20512	+	(TA)n	Simple_repeat	1267
MP_V2_GENOME_10150	21166	21193	+	AT_rich	Low_complexity	1268
MP_V2_GENOME_10150	22640	22778	+	rnd-6_family-5190	Unknown	1269
MP_V2_GENOME_10150	25242	25445	+	rnd-5_family-1884	DNA/MULE-MuDR	1270
MP_V2_GENOME_10150	25758	27130	+	rnd-5_family-7527	DNA/MULE-MuDR	1271
MP_V2_GENOME_10150	29881	30020	+	rnd-6_family-5190	Unknown	1272
MP_V2_GENOME_10150	30022	30373	-	rnd-5_family-2479	Unknown	1273
MP_V2_GENOME_10150	32279	32440	-	rnd-4_family-425	Unknown	1274
MP_V2_GENOME_10150	34228	34274	+	(GAAA)n	Simple_repeat	1275
MP_V2_GENOME_10150	37297	37318	+	AT_rich	Low_complexity	1276
MP_V2_GENOME_10150	40269	40529	-	rnd-4_family-1	Unknown	1277
MP_V2_GENOME_10150	45853	45877	+	(GA)n	Simple_repeat	1278
MP_V2_GENOME_10150	45880	45949	+	rnd-6_family-7511	LINE/L1	1279
MP_V2_GENOME_10150	50309	50391	+	T-rich	Low_complexity	1280
MP_V2_GENOME_10150	50536	50568	+	(TTTTTG)n	Simple_repeat	1281
MP_V2_GENOME_10150	51085	51266	+	AT_rich	Low_complexity	1282
MP_V2_GENOME_10150	56496	56518	+	(TA)n	Simple_repeat	1283
MP_V2_GENOME_10152	1	183	-	rnd-1_family-0	Unknown	1284
MP_V2_GENOME_10154	1	374	+	rnd-4_family-428	Unknown	1285
MP_V2_GENOME_10154	192	353	-	rnd-5_family-3927	Unknown	1286
MP_V2_GENOME_10154	380	435	+	AT_rich	Low_complexity	1287
MP_V2_GENOME_10154	872	894	+	(CA)n	Simple_repeat	1288
MP_V2_GENOME_10154	983	1030	+	AT_rich	Low_complexity	1289
MP_V2_GENOME_10154	1108	2138	-	rnd-5_family-340	Unknown	1290
MP_V2_GENOME_10154	2219	2487	-	rnd-5_family-340	Unknown	1291
MP_V2_GENOME_10154	2377	2514	+	rnd-5_family-340	Unknown	1292
MP_V2_GENOME_10154	2594	3097	-	rnd-5_family-1328	Unknown	1293
MP_V2_GENOME_10154	5757	5783	+	AT_rich	Low_complexity	1294
MP_V2_GENOME_10154	7131	7174	+	AT_rich	Low_complexity	1295
MP_V2_GENOME_10154	8542	8575	+	AT_rich	Low_complexity	1296
MP_V2_GENOME_10154	9008	9030	+	(TA)n	Simple_repeat	1297
MP_V2_GENOME_10154	9823	9845	+	(TA)n	Simple_repeat	1298
MP_V2_GENOME_10154	10968	11072	+	rnd-3_family-181	Unknown	1299
MP_V2_GENOME_10154	11281	11338	+	AT_rich	Low_complexity	1300
MP_V2_GENOME_10154	12174	12297	+	rnd-3_family-222	Unknown	1301
MP_V2_GENOME_10154	12427	12464	+	AT_rich	Low_complexity	1302
MP_V2_GENOME_10154	12488	12619	+	(TA)n	Simple_repeat	1303
MP_V2_GENOME_10154	12752	12846	-	rnd-4_family-96	Unknown	1304
MP_V2_GENOME_10154	12863	13211	+	rnd-5_family-1884	DNA/MULE-MuDR	1305
MP_V2_GENOME_10154	13214	13319	+	rnd-5_family-7527	DNA/MULE-MuDR	1306
MP_V2_GENOME_10155	1	44	-	rnd-1_family-0	Unknown	1307
MP_V2_GENOME_10155	45	364	-	rnd-1_family-1	LTR/Gypsy	1308
MP_V2_GENOME_10156	261	389	-	rnd-3_family-181	Unknown	1309
MP_V2_GENOME_10156	541	564	+	AT_rich	Low_complexity	1310
MP_V2_GENOME_10156	645	700	+	AT_rich	Low_complexity	1311
MP_V2_GENOME_10156	701	1079	-	rnd-1_family-44	LTR/Gypsy	1312
MP_V2_GENOME_10156	1080	1577	+	rnd-1_family-22	Unknown	1313
MP_V2_GENOME_10158	1	281	-	rnd-1_family-247	LTR/Copia	1314
MP_V2_GENOME_10158	290	627	-	rnd-5_family-5204	Unknown	1315
MP_V2_GENOME_10159	4811	5033	-	rnd-6_family-10243	Unknown	1316
MP_V2_GENOME_10159	5078	5268	+	rnd-1_family-286	Unknown	1317
MP_V2_GENOME_10159	5827	5902	+	AT_rich	Low_complexity	1318
MP_V2_GENOME_10159	9691	9893	-	rnd-4_family-397	Unknown	1319
MP_V2_GENOME_1016	780	803	+	AT_rich	Low_complexity	1320
MP_V2_GENOME_1016	1132	1152	+	AT_rich	Low_complexity	1321
MP_V2_GENOME_10160	7	546	+	rnd-1_family-81	LTR/Copia	1322
MP_V2_GENOME_10160	547	918	+	rnd-1_family-306	LTR/Copia	1323
MP_V2_GENOME_10160	926	1887	+	rnd-5_family-3398	LTR/Copia	1324
MP_V2_GENOME_10160	1937	2115	-	rnd-1_family-95	Unknown	1325
MP_V2_GENOME_10160	2118	2138	+	AT_rich	Low_complexity	1326
MP_V2_GENOME_10160	2120	2140	+	AT_rich	Low_complexity	1327
MP_V2_GENOME_10160	2339	2440	+	rnd-3_family-181	Unknown	1328
MP_V2_GENOME_10160	2458	2616	-	rnd-6_family-3087	Unknown	1329
MP_V2_GENOME_10160	2623	2759	+	rnd-6_family-1409	Unknown	1330
MP_V2_GENOME_10162	7	354	+	rnd-6_family-3025	DNA/CMC-EnSpm	1331
MP_V2_GENOME_10162	355	591	-	rnd-1_family-350	DNA/hAT-Ac	1332
MP_V2_GENOME_10162	912	1049	+	rnd-5_family-627	Unknown	1333
MP_V2_GENOME_10162	1057	1874	-	rnd-1_family-47	Unknown	1334
MP_V2_GENOME_10162	2147	2291	+	T-rich	Low_complexity	1335
MP_V2_GENOME_10162	2382	2524	+	rnd-4_family-889	Unknown	1336
MP_V2_GENOME_10162	2529	2593	+	T-rich	Low_complexity	1337
MP_V2_GENOME_10162	2613	2768	+	rnd-1_family-197	LTR/Gypsy	1338
MP_V2_GENOME_10162	2769	3024	+	rnd-1_family-78	LTR/Gypsy	1339
MP_V2_GENOME_10162	3049	3378	+	rnd-1_family-211	Unknown	1340
MP_V2_GENOME_10162	3379	3693	+	rnd-1_family-212	LTR/Gypsy	1341
MP_V2_GENOME_10162	3695	3753	+	rnd-5_family-426	Unknown	1342
MP_V2_GENOME_10162	3826	4191	+	rnd-1_family-198	Unknown	1343
MP_V2_GENOME_10162	4180	4254	+	rnd-1_family-226	Unknown	1344
MP_V2_GENOME_10162	4263	4421	-	rnd-1_family-213	Unknown	1345
MP_V2_GENOME_10162	4430	5080	+	rnd-3_family-1136	Unknown	1346
MP_V2_GENOME_10162	4961	5113	-	rnd-5_family-318	Unknown	1347
MP_V2_GENOME_10162	5160	5907	-	rnd-5_family-9499	Unknown	1348
MP_V2_GENOME_10162	5908	5927	+	(TAA)n	Simple_repeat	1349
MP_V2_GENOME_10162	5928	6595	-	rnd-5_family-9499	Unknown	1348
MP_V2_GENOME_10162	6603	6963	-	rnd-1_family-44	LTR/Gypsy	1350
MP_V2_GENOME_10162	6912	7820	+	rnd-1_family-22	Unknown	1351
MP_V2_GENOME_10162	7875	8076	-	rnd-1_family-32	LTR/Gypsy	1352
MP_V2_GENOME_10162	8093	9513	+	rnd-5_family-300	Unknown	1353
MP_V2_GENOME_10162	9499	9665	+	rnd-6_family-16761	Unknown	1354
MP_V2_GENOME_10162	9637	9755	+	rnd-5_family-300	Unknown	1353
MP_V2_GENOME_10162	9757	9918	-	rnd-1_family-213	Unknown	1355
MP_V2_GENOME_10162	9922	10172	+	rnd-3_family-1136	Unknown	1356
MP_V2_GENOME_10162	10170	10386	+	rnd-1_family-226	Unknown	1357
MP_V2_GENOME_10162	10390	10438	+	rnd-6_family-1629	Unknown	1358
MP_V2_GENOME_10162	10439	10529	+	rnd-1_family-263	LTR/Gypsy	1359
MP_V2_GENOME_10162	10530	10798	-	rnd-1_family-60	Unknown	1360
MP_V2_GENOME_10162	11077	11228	+	rnd-5_family-627	Unknown	1361
MP_V2_GENOME_10162	11235	12032	-	rnd-1_family-47	Unknown	1362
MP_V2_GENOME_10162	12035	13173	-	rnd-5_family-2970	LTR/Copia	1363
MP_V2_GENOME_10162	13174	13488	-	rnd-1_family-247	LTR/Copia	1364
MP_V2_GENOME_10162	13724	13745	+	AT_rich	Low_complexity	1365
MP_V2_GENOME_10162	13813	13853	+	AT_rich	Low_complexity	1366
MP_V2_GENOME_10162	14783	14824	+	AT_rich	Low_complexity	1367
MP_V2_GENOME_10162	15438	15947	-	rnd-5_family-5187	Unknown	1368
MP_V2_GENOME_10162	15954	16513	+	rnd-1_family-176	DNA/CMC-EnSpm	1369
MP_V2_GENOME_10162	16558	17295	+	rnd-6_family-142	DNA/CMC-EnSpm	1370
MP_V2_GENOME_10163	180	201	+	(TTTTA)n	Simple_repeat	1371
MP_V2_GENOME_10163	414	444	+	(TA)n	Simple_repeat	1372
MP_V2_GENOME_10163	494	553	+	(TA)n	Simple_repeat	1372
MP_V2_GENOME_10163	1076	1096	+	(TA)n	Simple_repeat	1373
MP_V2_GENOME_10163	2365	2385	+	AT_rich	Low_complexity	1374
MP_V2_GENOME_10163	2994	3020	+	(TA)n	Simple_repeat	1375
MP_V2_GENOME_10163	3228	3253	+	(TA)n	Simple_repeat	1376
MP_V2_GENOME_10163	3255	3274	+	(TG)n	Simple_repeat	1377
MP_V2_GENOME_10163	3459	3487	+	AT_rich	Low_complexity	1378
MP_V2_GENOME_10163	3738	3778	+	AT_rich	Low_complexity	1379
MP_V2_GENOME_10163	7687	7709	+	(TA)n	Simple_repeat	1380
MP_V2_GENOME_10163	8521	8544	+	(CAATT)n	Simple_repeat	1381
MP_V2_GENOME_10163	8716	8746	+	AT_rich	Low_complexity	1382
MP_V2_GENOME_10163	9015	9050	+	AT_rich	Low_complexity	1383
MP_V2_GENOME_10163	9143	9183	+	AT_rich	Low_complexity	1384
MP_V2_GENOME_10163	9199	9424	-	rnd-1_family-371	Unknown	1385
MP_V2_GENOME_10163	9444	9576	-	rnd-1_family-371	Unknown	1385
MP_V2_GENOME_10163	9544	9660	-	rnd-1_family-436	Unknown	1386
MP_V2_GENOME_10163	9778	10099	-	rnd-5_family-55	Unknown	1385
MP_V2_GENOME_10163	10143	10179	+	AT_rich	Low_complexity	1387
MP_V2_GENOME_10163	10812	10842	+	AT_rich	Low_complexity	1388
MP_V2_GENOME_10163	12980	13072	+	(CAT)n	Simple_repeat	1389
MP_V2_GENOME_10164	763	2898	-	rnd-6_family-11148	LTR/Copia	1390
MP_V2_GENOME_10164	3509	3974	+	rnd-1_family-150	RC/Helitron	1391
MP_V2_GENOME_10164	3984	4485	-	rnd-5_family-3099	Unknown	1392
MP_V2_GENOME_10164	4487	5247	+	rnd-1_family-153	RC/Helitron	1393
MP_V2_GENOME_10164	5341	5405	+	AT_rich	Low_complexity	1394
MP_V2_GENOME_10164	5422	5562	+	rnd-1_family-203	RC/Helitron	1395
MP_V2_GENOME_10164	5585	5876	+	rnd-1_family-203	RC/Helitron	1396
MP_V2_GENOME_10164	5890	5995	+	rnd-1_family-203	RC/Helitron	1395
MP_V2_GENOME_10164	5983	6300	-	rnd-1_family-300	Unknown	1397
MP_V2_GENOME_10164	6089	6624	+	rnd-1_family-172	RC/Helitron	1398
MP_V2_GENOME_10164	6638	6698	-	rnd-6_family-3559	Unknown	1399
MP_V2_GENOME_10164	6712	7013	+	rnd-1_family-221	RC/Helitron	1400
MP_V2_GENOME_10164	7117	7225	+	rnd-1_family-379	Unknown	1401
MP_V2_GENOME_10164	7251	7434	+	rnd-1_family-270	Unknown	1402
MP_V2_GENOME_10165	2	537	+	rnd-1_family-27	LTR/Gypsy	1403
MP_V2_GENOME_10166	1	340	+	rnd-6_family-2608	Unknown	1404
MP_V2_GENOME_10167	150	197	+	T-rich	Low_complexity	1405
MP_V2_GENOME_10167	228	395	-	rnd-5_family-6376	Unknown	1406
MP_V2_GENOME_10168	1	90	+	rnd-5_family-1031	LTR/Gypsy	1407
MP_V2_GENOME_10169	1	417	+	rnd-5_family-255	LTR/Copia	1408
MP_V2_GENOME_1017	12	79	+	rnd-1_family-425	Unknown	1409
MP_V2_GENOME_1017	90	266	-	rnd-1_family-15	Unknown	1410
MP_V2_GENOME_1017	257	483	-	rnd-1_family-68	Unknown	1411
MP_V2_GENOME_1017	484	1400	-	rnd-1_family-86	LTR/Copia	1412
MP_V2_GENOME_10170	1	1046	-	rnd-1_family-5	LTR/Gypsy	1413
MP_V2_GENOME_10170	1046	1559	-	rnd-1_family-100	LTR/Gypsy	1414
MP_V2_GENOME_10170	1574	1721	-	rnd-1_family-100	LTR/Gypsy	1415
MP_V2_GENOME_10170	1716	1977	-	rnd-1_family-100	LTR/Gypsy	1416
MP_V2_GENOME_10170	1978	2042	-	rnd-4_family-1107	Unknown	1417
MP_V2_GENOME_10170	2043	2671	+	rnd-4_family-460	Simple_repeat	1418
MP_V2_GENOME_10170	2672	2685	-	rnd-4_family-1107	Unknown	1417
MP_V2_GENOME_10170	2686	2728	+	rnd-1_family-87	LTR/Gypsy	1419
MP_V2_GENOME_10171	3	36	+	(GGAAA)n	Simple_repeat	1420
MP_V2_GENOME_10171	37	844	-	rnd-1_family-11	Unknown	1421
MP_V2_GENOME_10173	168	1295	-	rnd-4_family-19	LTR/Copia	1422
MP_V2_GENOME_10173	1292	1432	-	rnd-4_family-19	LTR/Copia	1422
MP_V2_GENOME_10173	1436	1877	-	rnd-1_family-292	LTR/Copia	1423
MP_V2_GENOME_10173	1881	2119	-	rnd-5_family-1212	LTR/Copia	1424
MP_V2_GENOME_10173	2129	2450	-	rnd-1_family-446	LTR/Copia	1425
MP_V2_GENOME_10173	2454	2784	-	rnd-4_family-18	LTR/Copia	1426
MP_V2_GENOME_10173	2793	2924	-	rnd-5_family-3784	Unknown	1427
MP_V2_GENOME_10174	421	445	+	AT_rich	Low_complexity	1428
MP_V2_GENOME_10174	706	725	+	(TAAAA)n	Simple_repeat	1429
MP_V2_GENOME_10174	1210	1428	-	rnd-6_family-7427	Unknown	1430
MP_V2_GENOME_10174	1433	1581	+	rnd-4_family-1735	Unknown	1431
MP_V2_GENOME_10174	1673	1834	-	rnd-5_family-3857	Unknown	1432
MP_V2_GENOME_10174	1827	2025	+	rnd-6_family-6719	Unknown	1433
MP_V2_GENOME_10174	1991	2088	-	rnd-1_family-169	Unknown	1434
MP_V2_GENOME_10174	6839	7085	-	rnd-6_family-941	Unknown	1435
MP_V2_GENOME_10174	7024	7289	+	rnd-5_family-425	Unknown	1436
MP_V2_GENOME_10174	7433	7864	+	rnd-6_family-8746	Unknown	1437
MP_V2_GENOME_10174	7862	8005	-	rnd-1_family-169	Unknown	1438
MP_V2_GENOME_10174	8377	8430	+	(TGG)n	Simple_repeat	1439
MP_V2_GENOME_10174	11382	11407	+	AT_rich	Low_complexity	1440
MP_V2_GENOME_10174	11475	11498	+	AT_rich	Low_complexity	1441
MP_V2_GENOME_10174	12310	12417	+	AT_rich	Low_complexity	1442
MP_V2_GENOME_10174	13021	13090	+	(TTAA)n	Simple_repeat	1443
MP_V2_GENOME_10174	13245	13338	+	AT_rich	Low_complexity	1444
MP_V2_GENOME_10174	13880	13967	+	AT_rich	Low_complexity	1445
MP_V2_GENOME_10174	13948	13970	+	AT_rich	Low_complexity	1446
MP_V2_GENOME_10174	14591	14611	+	(TA)n	Simple_repeat	1447
MP_V2_GENOME_10174	15959	15979	+	(TAA)n	Simple_repeat	1448
MP_V2_GENOME_10174	24491	24563	+	AT_rich	Low_complexity	1449
MP_V2_GENOME_10174	27968	28082	+	rnd-6_family-7202	Unknown	1450
MP_V2_GENOME_10174	29121	29198	+	AT_rich	Low_complexity	1451
MP_V2_GENOME_10174	29911	29930	+	(CAA)n	Simple_repeat	1452
MP_V2_GENOME_10175	1	25	+	(TA)n	Simple_repeat	1453
MP_V2_GENOME_10175	282	307	+	(TATG)n	Simple_repeat	1454
MP_V2_GENOME_10175	377	400	+	(TA)n	Simple_repeat	1455
MP_V2_GENOME_10175	436	531	+	AT_rich	Low_complexity	1456
MP_V2_GENOME_10176	1	310	-	rnd-4_family-2981	Unknown	1457
MP_V2_GENOME_10176	383	632	-	rnd-5_family-2531	Unknown	1458
MP_V2_GENOME_10176	2527	2609	+	rnd-5_family-1599	Unknown	1459
MP_V2_GENOME_10176	2546	2600	-	rnd-1_family-93	Unknown	1460
MP_V2_GENOME_10176	2572	2658	-	rnd-1_family-125	Unknown	1461
MP_V2_GENOME_10176	4758	5067	+	rnd-4_family-920	Unknown	1462
MP_V2_GENOME_10176	5284	5409	+	rnd-4_family-920	Unknown	1463
MP_V2_GENOME_10176	5673	5747	-	rnd-1_family-205	Unknown	1464
MP_V2_GENOME_10176	6282	6428	+	rnd-6_family-4226	Unknown	1465
MP_V2_GENOME_10176	6487	6570	+	rnd-5_family-4874	Unknown	1466
MP_V2_GENOME_10176	6693	6858	+	rnd-5_family-4874	Unknown	1467
MP_V2_GENOME_10176	7129	7272	+	rnd-6_family-4226	Unknown	1468
MP_V2_GENOME_10176	7242	7405	-	rnd-5_family-1564	Unknown	1469
MP_V2_GENOME_10176	7290	7420	+	rnd-5_family-4874	Unknown	1467
MP_V2_GENOME_10176	7563	7888	-	rnd-5_family-1564	Unknown	1470
MP_V2_GENOME_10176	7821	8138	+	rnd-6_family-18174	Unknown	1471
MP_V2_GENOME_10176	8124	8160	+	rnd-4_family-1606	LTR/Gypsy	1472
MP_V2_GENOME_10176	8144	8528	+	rnd-6_family-11921	Unknown	1473
MP_V2_GENOME_10176	8962	9075	-	rnd-5_family-1546	LTR/Pao	1474
MP_V2_GENOME_10176	9084	9251	+	rnd-5_family-4874	Unknown	1475
MP_V2_GENOME_10176	9638	9814	-	rnd-5_family-1564	Unknown	1476
MP_V2_GENOME_10176	9675	9888	+	rnd-5_family-4874	Unknown	1475
MP_V2_GENOME_10176	9965	10309	-	rnd-5_family-1564	Unknown	1477
MP_V2_GENOME_10176	10232	10561	+	rnd-6_family-18174	Unknown	1478
MP_V2_GENOME_10176	10722	10955	-	rnd-5_family-1564	Unknown	1479
MP_V2_GENOME_10176	10749	11081	+	rnd-6_family-18174	Unknown	1480
MP_V2_GENOME_10176	11330	11367	+	AT_rich	Low_complexity	1481
MP_V2_GENOME_10176	11785	11864	+	AT_rich	Low_complexity	1482
MP_V2_GENOME_10176	11989	12015	+	AT_rich	Low_complexity	1483
MP_V2_GENOME_10176	12020	12157	+	rnd-6_family-6892	Unknown	1484
MP_V2_GENOME_10176	12436	12489	+	AT_rich	Low_complexity	1485
MP_V2_GENOME_10176	12618	12811	+	rnd-6_family-6892	Unknown	1486
MP_V2_GENOME_10176	12812	12831	+	(TA)n	Simple_repeat	1487
MP_V2_GENOME_10177	1	865	-	rnd-1_family-86	LTR/Copia	1488
MP_V2_GENOME_10177	934	1678	-	rnd-1_family-20	LTR/Copia	1489
MP_V2_GENOME_10177	1679	1727	-	rnd-5_family-5933	LTR/Copia	1490
MP_V2_GENOME_10177	1740	1908	-	rnd-1_family-98	LTR/Copia	1491
MP_V2_GENOME_10177	1909	2025	-	rnd-5_family-5933	LTR/Copia	1492
MP_V2_GENOME_10177	2027	2219	-	rnd-1_family-206	LTR/Copia	1493
MP_V2_GENOME_10178	141	209	+	rnd-4_family-1372	LTR/Gypsy	1494
MP_V2_GENOME_10178	214	576	-	rnd-5_family-1611	Unknown	1495
MP_V2_GENOME_10178	578	777	+	rnd-4_family-1606	LTR/Gypsy	1496
MP_V2_GENOME_10178	827	905	+	AT_rich	Low_complexity	1497
MP_V2_GENOME_10178	1544	1581	+	AT_rich	Low_complexity	1498
MP_V2_GENOME_10178	1852	2092	-	rnd-4_family-940	LTR/Copia	1499
MP_V2_GENOME_10178	2219	2239	+	(TTATA)n	Simple_repeat	1500
MP_V2_GENOME_10178	2240	2300	+	AT_rich	Low_complexity	1501
MP_V2_GENOME_10178	3731	3753	+	(TTTTTA)n	Simple_repeat	1502
MP_V2_GENOME_10178	3844	3885	+	AT_rich	Low_complexity	1503
MP_V2_GENOME_10178	3923	4072	+	rnd-5_family-4006	Unknown	1504
MP_V2_GENOME_10178	4524	4939	+	rnd-5_family-4006	Unknown	1504
MP_V2_GENOME_10178	5034	5187	+	rnd-5_family-4006	Unknown	1504
MP_V2_GENOME_10178	5948	5974	+	(TA)n	Simple_repeat	1505
MP_V2_GENOME_10178	6024	6290	-	rnd-6_family-4275	Unknown	1506
MP_V2_GENOME_10178	7914	8003	+	rnd-5_family-4006	Unknown	1507
MP_V2_GENOME_10178	8583	8661	+	rnd-5_family-4006	Unknown	1507
MP_V2_GENOME_10178	8790	8837	+	AT_rich	Low_complexity	1508
MP_V2_GENOME_10178	8878	8980	+	AT_rich	Low_complexity	1509
MP_V2_GENOME_10179	17	142	-	rnd-4_family-413	Unknown	1510
MP_V2_GENOME_10179	1032	1054	+	AT_rich	Low_complexity	1511
MP_V2_GENOME_10179	6814	6955	+	rnd-5_family-52	DNA/hAT-Ac	1512
MP_V2_GENOME_10179	8766	8785	+	(TA)n	Simple_repeat	1513
MP_V2_GENOME_10179	10178	10197	+	(TA)n	Simple_repeat	1514
MP_V2_GENOME_10179	11439	11461	+	AT_rich	Low_complexity	1515
MP_V2_GENOME_10179	12317	12377	+	rnd-6_family-550	LTR/Copia	1516
MP_V2_GENOME_10179	13204	13310	-	rnd-4_family-1	Unknown	1517
MP_V2_GENOME_10179	15753	16241	-	rnd-6_family-1607	Unknown	1518
MP_V2_GENOME_10179	16244	16519	+	rnd-6_family-6281	Unknown	1519
MP_V2_GENOME_10179	16497	16628	+	rnd-6_family-13715	Unknown	1520
MP_V2_GENOME_10179	16651	16817	+	AT_rich	Low_complexity	1521
MP_V2_GENOME_10179	16864	16947	+	rnd-6_family-9541	Unknown	1522
MP_V2_GENOME_10179	17981	18059	-	rnd-3_family-181	Unknown	1523
MP_V2_GENOME_10179	18886	18960	-	rnd-4_family-2981	Unknown	1524
MP_V2_GENOME_10179	19837	20028	-	rnd-5_family-64	Unknown	1525
MP_V2_GENOME_10179	21550	21867	+	rnd-5_family-599	Unknown	1526
MP_V2_GENOME_10179	21875	21973	-	rnd-1_family-24	LTR/Gypsy	1527
MP_V2_GENOME_10179	22626	22824	-	rnd-5_family-5353	Unknown	1528
MP_V2_GENOME_10179	22809	23520	-	rnd-6_family-4275	Unknown	1529
MP_V2_GENOME_10179	23785	23855	-	rnd-5_family-2479	Unknown	1530
MP_V2_GENOME_1018	38	121	+	AT_rich	Low_complexity	1531
MP_V2_GENOME_1018	296	424	-	rnd-6_family-19812	Unknown	1532
MP_V2_GENOME_1018	1013	1584	-	rnd-1_family-286	Unknown	1533
MP_V2_GENOME_1018	1855	2750	-	rnd-5_family-6376	Unknown	1534
MP_V2_GENOME_1018	2825	3036	-	rnd-5_family-5283	Unknown	1535
MP_V2_GENOME_1018	2842	3065	+	rnd-3_family-341	Unknown	1536
MP_V2_GENOME_1018	3909	4494	-	rnd-1_family-286	Unknown	1537
MP_V2_GENOME_1018	4767	5704	-	rnd-5_family-6376	Unknown	1538
MP_V2_GENOME_1018	6288	6462	+	rnd-6_family-2073	Unknown	1539
MP_V2_GENOME_1018	6321	6895	-	rnd-4_family-213	Unknown	1540
MP_V2_GENOME_1018	7215	7824	-	rnd-1_family-286	Unknown	1541
MP_V2_GENOME_1018	7897	8812	-	rnd-5_family-6376	Unknown	1542
MP_V2_GENOME_1018	9373	9563	-	rnd-5_family-340	Unknown	1543
MP_V2_GENOME_1018	10873	11485	-	rnd-1_family-286	Unknown	1544
MP_V2_GENOME_1018	12087	12990	-	rnd-5_family-6376	Unknown	1545
MP_V2_GENOME_1018	13222	13273	+	AT_rich	Low_complexity	1546
MP_V2_GENOME_1018	13474	13626	+	rnd-3_family-240	Unknown	1547
MP_V2_GENOME_1018	13972	13993	+	AT_rich	Low_complexity	1548
MP_V2_GENOME_1018	14907	15522	-	rnd-1_family-286	Unknown	1549
MP_V2_GENOME_1018	15772	16696	-	rnd-5_family-6376	Unknown	1550
MP_V2_GENOME_1018	16724	16960	+	rnd-6_family-10243	Unknown	1551
MP_V2_GENOME_1018	17111	17234	+	AT_rich	Low_complexity	1552
MP_V2_GENOME_1018	17719	17964	-	rnd-1_family-247	LTR/Copia	1553
MP_V2_GENOME_1018	18021	18285	-	rnd-5_family-8891	Unknown	1554
MP_V2_GENOME_1018	18636	19248	-	rnd-1_family-286	Unknown	1555
MP_V2_GENOME_1018	19449	20270	-	rnd-5_family-6376	Unknown	1556
MP_V2_GENOME_1018	20547	20847	+	rnd-6_family-2009	Unknown	1557
MP_V2_GENOME_10180	1	271	-	rnd-4_family-1105	Unknown	1558
MP_V2_GENOME_10180	797	863	+	AT_rich	Low_complexity	1559
MP_V2_GENOME_10180	878	1093	+	rnd-1_family-62	Unknown	1560
MP_V2_GENOME_10180	1320	1683	+	rnd-1_family-9	Unknown	1561
MP_V2_GENOME_10180	1391	1736	-	rnd-1_family-2	Unknown	1562
MP_V2_GENOME_10180	1765	1884	-	rnd-6_family-5816	Unknown	1563
MP_V2_GENOME_10181	1	690	-	rnd-1_family-122	LTR/Copia	1564
MP_V2_GENOME_10181	660	1489	-	rnd-1_family-58	LTR/Copia	1565
MP_V2_GENOME_10182	2298	2321	+	AT_rich	Low_complexity	1566
MP_V2_GENOME_10182	3554	3575	+	AT_rich	Low_complexity	1567
MP_V2_GENOME_10183	14	100	-	rnd-6_family-4935	Unknown	1568
MP_V2_GENOME_10183	1143	1243	-	rnd-6_family-7415	DNA/TcMar-Fot1	1569
MP_V2_GENOME_10183	1161	1245	-	rnd-1_family-93	Unknown	1570
MP_V2_GENOME_10183	1307	1330	+	(A)n	Simple_repeat	1571
MP_V2_GENOME_10183	1414	1465	+	(GA)n	Simple_repeat	1572
MP_V2_GENOME_10183	1819	1847	+	(TA)n	Simple_repeat	1573
MP_V2_GENOME_10184	1	316	-	rnd-1_family-384	Unknown	1574
MP_V2_GENOME_10185	6	27	+	AT_rich	Low_complexity	1575
MP_V2_GENOME_10185	75	123	+	AT_rich	Low_complexity	1576
MP_V2_GENOME_10185	202	247	+	AT_rich	Low_complexity	1577
MP_V2_GENOME_10185	429	507	-	rnd-6_family-7882	Unknown	1578
MP_V2_GENOME_10185	563	827	-	rnd-6_family-7882	Unknown	1578
MP_V2_GENOME_10186	9771	9796	+	AT_rich	Low_complexity	1579
MP_V2_GENOME_10186	9777	9802	+	AT_rich	Low_complexity	1580
MP_V2_GENOME_10186	14603	14751	+	rnd-3_family-240	Unknown	1581
MP_V2_GENOME_10186	15634	15668	+	(GA)n	Simple_repeat	1582
MP_V2_GENOME_10186	15784	15935	-	rnd-6_family-16759	Unknown	1583
MP_V2_GENOME_10186	17386	17535	-	rnd-6_family-16759	Unknown	1584
MP_V2_GENOME_10186	17651	17784	+	AT_rich	Low_complexity	1585
MP_V2_GENOME_10186	17822	17995	+	rnd-6_family-16759	Unknown	1586
MP_V2_GENOME_10186	18312	18402	+	AT_rich	Low_complexity	1587
MP_V2_GENOME_10186	18469	18563	+	AT_rich	Low_complexity	1588
MP_V2_GENOME_10186	18970	19478	+	rnd-5_family-2479	Unknown	1589
MP_V2_GENOME_10186	19290	20146	-	rnd-5_family-623	Unknown	1590
MP_V2_GENOME_10186	22955	23080	+	A-rich	Low_complexity	1591
MP_V2_GENOME_10186	24678	24706	+	(TA)n	Simple_repeat	1592
MP_V2_GENOME_10187	182	209	+	AT_rich	Low_complexity	1593
MP_V2_GENOME_10187	231	313	+	rnd-5_family-165	DNA/MULE-MuDR	1594
MP_V2_GENOME_10187	324	356	+	AT_rich	Low_complexity	1595
MP_V2_GENOME_10188	21	205	-	rnd-5_family-750	DNA/hAT-Ac	1596
MP_V2_GENOME_10188	337	385	+	AT_rich	Low_complexity	1597
MP_V2_GENOME_10189	1	322	-	rnd-1_family-5	LTR/Gypsy	1598
MP_V2_GENOME_1019	276	407	+	rnd-3_family-240	Unknown	1599
MP_V2_GENOME_1019	477	498	+	AT_rich	Low_complexity	1600
MP_V2_GENOME_1019	940	1478	+	rnd-4_family-901	Unknown	1601
MP_V2_GENOME_1019	1500	1564	+	AT_rich	Low_complexity	1602
MP_V2_GENOME_1019	1665	1746	+	rnd-6_family-3002	Unknown	1603
MP_V2_GENOME_1019	1927	1970	-	rnd-4_family-413	Unknown	1604
MP_V2_GENOME_1019	3908	4320	+	rnd-5_family-1336	DNA/PIF-Harbinger	1605
MP_V2_GENOME_1019	4229	4354	+	rnd-6_family-2750	Unknown	1606
MP_V2_GENOME_1019	6919	7527	-	rnd-6_family-1039	Unknown	1607
MP_V2_GENOME_1019	7092	7758	+	rnd-5_family-1336	DNA/PIF-Harbinger	1608
MP_V2_GENOME_1019	8878	9020	-	rnd-5_family-3784	Unknown	1609
MP_V2_GENOME_1019	9044	9106	-	rnd-1_family-92	LTR/Copia	1610
MP_V2_GENOME_1019	10293	10313	+	AT_rich	Low_complexity	1611
MP_V2_GENOME_1019	10359	10390	+	A-rich	Low_complexity	1612
MP_V2_GENOME_1019	10584	10603	+	(TA)n	Simple_repeat	1613
MP_V2_GENOME_10190	161	201	-	rnd-4_family-397	Unknown	1614
MP_V2_GENOME_10190	1209	1231	+	GC_rich	Low_complexity	1615
MP_V2_GENOME_10190	1420	1468	+	AT_rich	Low_complexity	1616
MP_V2_GENOME_10190	2141	2164	+	AT_rich	Low_complexity	1617
MP_V2_GENOME_10190	3500	3526	+	(CTATA)n	Simple_repeat	1618
MP_V2_GENOME_10190	3845	3890	+	AT_rich	Low_complexity	1619
MP_V2_GENOME_10190	3976	4014	+	AT_rich	Low_complexity	1620
MP_V2_GENOME_10190	4388	4410	+	AT_rich	Low_complexity	1621
MP_V2_GENOME_10190	6874	6904	+	AT_rich	Low_complexity	1622
MP_V2_GENOME_10190	7203	7381	+	rnd-6_family-1958	Unknown	1623
MP_V2_GENOME_10190	8754	8982	-	rnd-6_family-3937	Unknown	1624
MP_V2_GENOME_10190	8984	9091	+	AT_rich	Low_complexity	1625
MP_V2_GENOME_10190	9772	9820	+	AT_rich	Low_complexity	1626
MP_V2_GENOME_10191	4	249	+	rnd-1_family-211	Unknown	1627
MP_V2_GENOME_10192	84	115	+	AT_rich	Low_complexity	1628
MP_V2_GENOME_10193	1738	1761	+	AT_rich	Low_complexity	1629
MP_V2_GENOME_10193	1816	1839	+	AT_rich	Low_complexity	1630
MP_V2_GENOME_10193	1980	2084	+	AT_rich	Low_complexity	1631
MP_V2_GENOME_10193	2273	2849	+	rnd-4_family-213	Unknown	1632
MP_V2_GENOME_10193	3055	3159	+	AT_rich	Low_complexity	1633
MP_V2_GENOME_10193	3340	3955	+	rnd-4_family-213	Unknown	1634
MP_V2_GENOME_10193	7284	7304	+	(TA)n	Simple_repeat	1635
MP_V2_GENOME_10193	7651	7688	+	rnd-6_family-7415	DNA/TcMar-Fot1	1636
MP_V2_GENOME_10194	2	151	-	rnd-3_family-101	Unknown	1637
MP_V2_GENOME_10195	692	754	+	AT_rich	Low_complexity	1638
MP_V2_GENOME_10195	1613	1634	+	AT_rich	Low_complexity	1639
MP_V2_GENOME_10195	2822	2861	+	(TATG)n	Simple_repeat	1640
MP_V2_GENOME_10195	3651	3682	+	(TTAA)n	Simple_repeat	1641
MP_V2_GENOME_10196	1	31	+	(TTA)n	Simple_repeat	1642
MP_V2_GENOME_10196	329	389	+	A-rich	Low_complexity	1643
MP_V2_GENOME_10196	427	466	+	AT_rich	Low_complexity	1644
MP_V2_GENOME_10197	1	153	-	rnd-6_family-3925	Unknown	1645
MP_V2_GENOME_10198	644	818	-	rnd-3_family-240	Unknown	1646
MP_V2_GENOME_10198	1083	1144	+	AT_rich	Low_complexity	1647
MP_V2_GENOME_10198	1341	1752	+	rnd-4_family-40	Unknown	1648
MP_V2_GENOME_10198	2839	2864	+	(TG)n	Simple_repeat	1649
MP_V2_GENOME_10198	3130	3156	+	(TA)n	Simple_repeat	1650
MP_V2_GENOME_10198	3286	3316	+	AT_rich	Low_complexity	1651
MP_V2_GENOME_10198	3367	3394	+	(TTCA)n	Simple_repeat	1652
MP_V2_GENOME_10198	3534	3555	+	(TA)n	Simple_repeat	1653
MP_V2_GENOME_10198	4052	4425	+	rnd-4_family-199	Unknown	1654
MP_V2_GENOME_10198	4436	4845	+	rnd-5_family-3891	Unknown	1655
MP_V2_GENOME_10198	5086	5114	+	AT_rich	Low_complexity	1656
MP_V2_GENOME_10198	5304	5333	+	(TA)n	Simple_repeat	1657
MP_V2_GENOME_10198	6773	6796	+	(TG)n	Simple_repeat	1658
MP_V2_GENOME_102	87	223	+	AT_rich	Low_complexity	1659
MP_V2_GENOME_102	599	634	+	AT_rich	Low_complexity	1660
MP_V2_GENOME_102	1277	1330	+	(TC)n	Simple_repeat	1661
MP_V2_GENOME_102	2107	2135	+	(GA)n	Simple_repeat	1662
MP_V2_GENOME_102	3045	3074	+	AT_rich	Low_complexity	1663
MP_V2_GENOME_102	3327	3370	+	AT_rich	Low_complexity	1664
MP_V2_GENOME_102	3486	3514	+	AT_rich	Low_complexity	1665
MP_V2_GENOME_1020	1	22	+	AT_rich	Low_complexity	1666
MP_V2_GENOME_10200	543	583	+	AT_rich	Low_complexity	1667
MP_V2_GENOME_10200	926	947	+	AT_rich	Low_complexity	1668
MP_V2_GENOME_10200	1074	1146	+	AT_rich	Low_complexity	1669
MP_V2_GENOME_10200	2372	2826	-	rnd-1_family-57	DNA/hAT-Ac	1670
MP_V2_GENOME_10200	3233	3260	+	AT_rich	Low_complexity	1671
MP_V2_GENOME_10200	3238	3264	+	AT_rich	Low_complexity	1672
MP_V2_GENOME_10200	3563	3744	-	rnd-1_family-57	DNA/hAT-Ac	1673
MP_V2_GENOME_10201	1	190	+	rnd-4_family-397	Unknown	1674
MP_V2_GENOME_10201	202	306	+	rnd-5_family-300	Unknown	1675
MP_V2_GENOME_10201	303	471	+	rnd-1_family-15	Unknown	1676
MP_V2_GENOME_10201	489	925	-	rnd-1_family-13	Unknown	1677
MP_V2_GENOME_10201	926	1296	-	rnd-1_family-45	LTR/Gypsy	1678
MP_V2_GENOME_10202	28	51	+	(TA)n	Simple_repeat	1679
MP_V2_GENOME_10202	266	303	+	(TA)n	Simple_repeat	1680
MP_V2_GENOME_10202	448	469	+	(TA)n	Simple_repeat	1681
MP_V2_GENOME_10202	542	571	+	AT_rich	Low_complexity	1682
MP_V2_GENOME_10202	1150	1193	+	(TTC)n	Simple_repeat	1683
MP_V2_GENOME_10202	1540	1574	+	(TA)n	Simple_repeat	1684
MP_V2_GENOME_10202	1959	1981	+	(TA)n	Simple_repeat	1685
MP_V2_GENOME_10202	2240	2276	+	AT_rich	Low_complexity	1686
MP_V2_GENOME_10202	2278	2481	+	rnd-6_family-4905	DNA/hAT-Ac	1687
MP_V2_GENOME_10202	3007	3050	+	AT_rich	Low_complexity	1688
MP_V2_GENOME_10202	3728	3763	+	AT_rich	Low_complexity	1689
MP_V2_GENOME_10203	1	145	-	rnd-1_family-0	Unknown	1690
MP_V2_GENOME_10205	1133	1163	+	AT_rich	Low_complexity	1691
MP_V2_GENOME_10205	2151	2171	+	AT_rich	Low_complexity	1692
MP_V2_GENOME_10205	7092	7153	+	AT_rich	Low_complexity	1693
MP_V2_GENOME_10205	7506	7606	-	rnd-4_family-425	Unknown	1694
MP_V2_GENOME_10205	7662	7740	+	rnd-4_family-425	Unknown	1695
MP_V2_GENOME_10205	11533	11555	+	(TA)n	Simple_repeat	1696
MP_V2_GENOME_10205	11812	11849	+	AT_rich	Low_complexity	1697
MP_V2_GENOME_10205	12290	12349	+	(CATATA)n	Simple_repeat	1698
MP_V2_GENOME_10205	12650	12690	+	AT_rich	Low_complexity	1699
MP_V2_GENOME_10205	12919	12957	+	AT_rich	Low_complexity	1700
MP_V2_GENOME_10205	13474	13531	+	(TA)n	Simple_repeat	1701
MP_V2_GENOME_10206	2001	2498	-	rnd-6_family-10921	LTR/Copia	1702
MP_V2_GENOME_10206	2655	3054	-	rnd-1_family-17	Unknown	1703
MP_V2_GENOME_10206	2990	3212	+	rnd-1_family-96	Unknown	1704
MP_V2_GENOME_10207	1	139	+	rnd-6_family-20739	Unknown	1705
MP_V2_GENOME_10208	1	162	+	rnd-6_family-6318	Unknown	1706
MP_V2_GENOME_10208	167	389	+	rnd-1_family-252	Unknown	1707
MP_V2_GENOME_1021	126	903	-	rnd-5_family-1445	Unknown	1708
MP_V2_GENOME_1021	1454	1523	-	rnd-5_family-1445	Unknown	1708
MP_V2_GENOME_10210	1	27	+	(TA)n	Simple_repeat	1709
MP_V2_GENOME_10210	3429	3450	+	(TAAA)n	Simple_repeat	1710
MP_V2_GENOME_10210	3619	3736	-	rnd-4_family-425	Unknown	1711
MP_V2_GENOME_10210	3854	3901	+	AT_rich	Low_complexity	1712
MP_V2_GENOME_10210	12865	12912	+	AT_rich	Low_complexity	1713
MP_V2_GENOME_10210	13196	13416	+	rnd-1_family-2	Unknown	1714
MP_V2_GENOME_10210	13245	13676	-	rnd-1_family-9	Unknown	1715
MP_V2_GENOME_10210	14451	14470	+	(TAAA)n	Simple_repeat	1716
MP_V2_GENOME_10210	14659	14738	+	AT_rich	Low_complexity	1717
MP_V2_GENOME_10210	14959	15009	+	AT_rich	Low_complexity	1718
MP_V2_GENOME_10210	15651	15691	+	AT_rich	Low_complexity	1719
MP_V2_GENOME_10210	15887	15938	+	AT_rich	Low_complexity	1720
MP_V2_GENOME_10210	23669	23760	-	rnd-5_family-745	Unknown	1721
MP_V2_GENOME_10210	24248	25758	-	rnd-5_family-745	Unknown	1721
MP_V2_GENOME_10210	26294	26405	-	rnd-5_family-745	Unknown	1722
29477	31824	-6268	rnd-5_family-745	Unknown	770
MP_V2_GENOME_10210	31906	32140	+	rnd-5_family-745	Unknown	1724
MP_V2_GENOME_10210	33602	33647	+	AT_rich	Low_complexity	1725
MP_V2_GENOME_10210	33732	33841	+	AT_rich	Low_complexity	1726
MP_V2_GENOME_10210	33865	33889	+	AT_rich	Low_complexity	1727
MP_V2_GENOME_10210	34133	35102	+	rnd-1_family-55	Unknown	1728
MP_V2_GENOME_10210	34762	35892	-	rnd-1_family-11	Unknown	1729
MP_V2_GENOME_10210	35889	36873	-	rnd-1_family-283	Unknown	1730
MP_V2_GENOME_10210	36876	36923	-	rnd-5_family-2158	Unknown	1731
MP_V2_GENOME_10210	36925	37017	+	rnd-1_family-392	LTR/Gypsy	1732
MP_V2_GENOME_10210	37021	38092	+	rnd-1_family-392	LTR/Gypsy	1732
MP_V2_GENOME_10212	1	398	+	rnd-5_family-7485	Unknown	1733
MP_V2_GENOME_10212	405	1267	-	rnd-1_family-248	Unknown	1734
MP_V2_GENOME_10212	1271	1556	+	rnd-5_family-412	Unknown	1735
MP_V2_GENOME_10212	1562	1850	-	rnd-6_family-6281	Unknown	1736
MP_V2_GENOME_10212	1850	2071	+	rnd-5_family-412	Unknown	1737
MP_V2_GENOME_10212	2082	2457	+	rnd-5_family-412	Unknown	1738
MP_V2_GENOME_10212	2464	2700	-	rnd-1_family-397	Unknown	1739
MP_V2_GENOME_10212	2701	2836	-	rnd-1_family-2	Unknown	1740
MP_V2_GENOME_10212	7474	7495	+	(TAAAA)n	Simple_repeat	1741
MP_V2_GENOME_10213	6	205	-	rnd-5_family-351	Unknown	1742
253	1784	-6333	rnd-5_family-167	Unknown	1
MP_V2_GENOME_10213	1418	1881	-	rnd-5_family-10768	Unknown	1744
MP_V2_GENOME_10213	3249	3281	+	T-rich	Low_complexity	1745
MP_V2_GENOME_10213	5280	5300	+	AT_rich	Low_complexity	1746
MP_V2_GENOME_10214	1	2643	-	rnd-1_family-3	LTR/Copia	1747
MP_V2_GENOME_10214	2644	3088	-	rnd-4_family-108	LTR/Copia	1748
MP_V2_GENOME_10214	3249	3383	+	rnd-5_family-1599	Unknown	1749
MP_V2_GENOME_10214	3268	3441	-	rnd-1_family-125	Unknown	1750
MP_V2_GENOME_10215	49	151	+	rnd-1_family-144	Unknown	1751
MP_V2_GENOME_10215	436	486	+	AT_rich	Low_complexity	1752
MP_V2_GENOME_10215	1300	1424	-	rnd-1_family-243	Unknown	1753
MP_V2_GENOME_10215	1436	1586	-	rnd-1_family-243	Unknown	1754
MP_V2_GENOME_10215	1509	2000	-	rnd-1_family-182	LTR/Gypsy	1755
MP_V2_GENOME_10215	1999	2644	-	rnd-5_family-1256	LTR/Gypsy	1756
MP_V2_GENOME_10216	1	204	-	rnd-1_family-47	Unknown	1757
MP_V2_GENOME_10216	188	230	+	rnd-6_family-614	Unknown	1758
MP_V2_GENOME_10217	1	190	-	rnd-6_family-2150	DNA/hAT-Ac	1759
MP_V2_GENOME_10217	330	497	+	rnd-5_family-2846	Unknown	1760
MP_V2_GENOME_10218	1	402	+	rnd-1_family-45	LTR/Gypsy	1761
MP_V2_GENOME_10218	216	768	+	rnd-1_family-13	Unknown	1762
MP_V2_GENOME_10219	260	325	+	AT_rich	Low_complexity	1763
MP_V2_GENOME_10219	622	646	+	AT_rich	Low_complexity	1764
MP_V2_GENOME_10219	674	749	+	rnd-1_family-93	Unknown	1765
MP_V2_GENOME_10219	784	1239	+	rnd-6_family-3540	Unknown	1766
MP_V2_GENOME_10219	1195	1315	-	rnd-4_family-163	Unknown	1767
MP_V2_GENOME_10219	1316	1341	+	(TAA)n	Simple_repeat	1768
MP_V2_GENOME_10219	1342	1585	-	rnd-4_family-163	Unknown	1767
MP_V2_GENOME_10219	1658	1701	-	rnd-1_family-93	Unknown	1769
MP_V2_GENOME_10219	1670	1709	+	rnd-5_family-351	Unknown	1770
MP_V2_GENOME_10219	1927	2030	+	AT_rich	Low_complexity	1771
MP_V2_GENOME_10219	2579	2634	+	AT_rich	Low_complexity	1772
MP_V2_GENOME_10219	2653	2718	+	(TTTTA)n	Simple_repeat	1773
MP_V2_GENOME_10219	3374	3408	+	AT_rich	Low_complexity	1774
MP_V2_GENOME_10219	3586	3620	+	AT_rich	Low_complexity	1775
MP_V2_GENOME_10219	4438	4462	+	AT_rich	Low_complexity	1776
MP_V2_GENOME_10219	4827	4846	+	(TTA)n	Simple_repeat	1777
MP_V2_GENOME_10219	6577	6683	+	GA-rich	Low_complexity	1778
MP_V2_GENOME_10219	8783	8905	-	rnd-1_family-136	LTR/Gypsy	1779
MP_V2_GENOME_10219	9150	9372	-	rnd-1_family-136	LTR/Gypsy	1779
MP_V2_GENOME_10219	10716	10907	-	rnd-1_family-107	LTR/Gypsy	1780
MP_V2_GENOME_10219	10910	11857	+	rnd-1_family-55	Unknown	1781
MP_V2_GENOME_10219	11519	11987	-	rnd-1_family-11	Unknown	1782
MP_V2_GENOME_10219	14678	15405	+	rnd-5_family-531	Unknown	1783
MP_V2_GENOME_10219	14748	15049	-	rnd-4_family-235	Unknown	1784
MP_V2_GENOME_10219	17177	17223	+	AT_rich	Low_complexity	1785
MP_V2_GENOME_10219	17527	17570	+	AT_rich	Low_complexity	1786
MP_V2_GENOME_10219	17871	18105	+	rnd-6_family-65	LTR/Copia	1787
MP_V2_GENOME_10219	18245	18264	+	(TA)n	Simple_repeat	1788
MP_V2_GENOME_10219	18335	18417	+	CT-rich	Low_complexity	1789
MP_V2_GENOME_10219	18682	18942	+	rnd-1_family-43	Unknown	1790
MP_V2_GENOME_10219	19234	19318	+	rnd-6_family-5190	Unknown	1791
MP_V2_GENOME_10219	19324	19388	-	rnd-5_family-5181	Unknown	1792
MP_V2_GENOME_10219	19865	19906	+	AT_rich	Low_complexity	1793
MP_V2_GENOME_10219	20100	20214	-	rnd-4_family-425	Unknown	1794
MP_V2_GENOME_10219	20202	20621	+	rnd-5_family-2479	Unknown	1795
MP_V2_GENOME_10219	20623	21097	+	rnd-6_family-703	Unknown	1796
MP_V2_GENOME_1022	3	65	+	rnd-5_family-1445	Unknown	1797
MP_V2_GENOME_1022	81	366	+	rnd-5_family-1445	Unknown	1798
MP_V2_GENOME_10220	330	784	-	rnd-1_family-151	Unknown	1799
MP_V2_GENOME_10220	785	1025	+	rnd-1_family-92	LTR/Copia	1800
MP_V2_GENOME_10220	1076	1207	+	rnd-5_family-3784	Unknown	1801
MP_V2_GENOME_10220	1208	1418	+	rnd-1_family-306	LTR/Copia	1802
MP_V2_GENOME_10220	1419	2136	+	rnd-5_family-1662	LTR/Copia	1803
MP_V2_GENOME_10220	2235	2395	-	rnd-5_family-1599	Unknown	1804
MP_V2_GENOME_10221	392	668	-	rnd-5_family-1445	Unknown	1805
MP_V2_GENOME_10222	1	272	-	rnd-4_family-889	Unknown	1806
MP_V2_GENOME_10224	352	488	-	rnd-6_family-3010	DNA/PIF-Harbinger	1807
MP_V2_GENOME_10224	639	1459	-	rnd-6_family-1587	Unknown	1808
MP_V2_GENOME_10224	1484	1726	-	rnd-1_family-2	Unknown	1809
MP_V2_GENOME_10224	10095	10116	+	AT_rich	Low_complexity	1810
MP_V2_GENOME_10224	16484	16503	+	(CCCCCT)n	Simple_repeat	1811
MP_V2_GENOME_10224	16576	17072	-	rnd-5_family-340	Unknown	1812
MP_V2_GENOME_10224	16589	16694	+	rnd-6_family-1014	Unknown	1813
17073	18766	-1216	rnd-6_family-4233	DNA/MULE-MuDR	1
MP_V2_GENOME_10224	18774	18972	+	rnd-5_family-7527	DNA/MULE-MuDR	1815
MP_V2_GENOME_10224	19016	19982	+	rnd-6_family-4233	DNA/MULE-MuDR	1816
MP_V2_GENOME_10225	2458	2573	+	AT_rich	Low_complexity	1817
MP_V2_GENOME_10225	2641	2711	+	AT_rich	Low_complexity	1818
MP_V2_GENOME_10225	2747	2836	+	(TAA)n	Simple_repeat	1819
MP_V2_GENOME_10225	3381	3758	-	rnd-4_family-753	Unknown	1820
MP_V2_GENOME_10225	3766	4050	+	rnd-5_family-1857	Unknown	1821
MP_V2_GENOME_10225	4027	4282	+	rnd-1_family-103	Unknown	1822
MP_V2_GENOME_10225	4104	4881	+	rnd-1_family-27	LTR/Gypsy	1823
MP_V2_GENOME_10225	5175	5196	+	(TA)n	Simple_repeat	1824
MP_V2_GENOME_10225	6331	6355	+	(TA)n	Simple_repeat	1825
MP_V2_GENOME_10225	7383	7428	+	(TTA)n	Simple_repeat	1826
MP_V2_GENOME_10225	8967	9058	+	AT_rich	Low_complexity	1827
MP_V2_GENOME_10225	9222	9265	+	(TA)n	Simple_repeat	1828
MP_V2_GENOME_10225	9347	11153	-	rnd-6_family-7378	LINE/L1	1829
MP_V2_GENOME_10225	13020	13111	-	rnd-4_family-413	Unknown	1830
MP_V2_GENOME_10225	13114	13219	+	AT_rich	Low_complexity	1831
MP_V2_GENOME_10225	13308	13700	-	rnd-5_family-1027	Unknown	1832
MP_V2_GENOME_10225	13836	13922	-	rnd-5_family-1027	Unknown	1833
MP_V2_GENOME_10225	13932	14010	+	AT_rich	Low_complexity	1834
MP_V2_GENOME_10225	14240	14266	+	(TTTTA)n	Simple_repeat	1835
MP_V2_GENOME_10225	14350	14421	-	rnd-4_family-1793	Unknown	1836
MP_V2_GENOME_10225	14910	14957	+	(TAA)n	Simple_repeat	1837
MP_V2_GENOME_10225	16473	16543	+	rnd-3_family-181	Unknown	1838
MP_V2_GENOME_10225	16681	16843	-	rnd-6_family-3671	Unknown	1839
MP_V2_GENOME_10225	17028	17091	+	AT_rich	Low_complexity	1840
MP_V2_GENOME_10225	17093	17554	+	rnd-5_family-4874	Unknown	1841
MP_V2_GENOME_10225	17798	17982	-	rnd-4_family-413	Unknown	1842
MP_V2_GENOME_10225	17998	18070	+	AT_rich	Low_complexity	1843
MP_V2_GENOME_10225	18287	18664	+	rnd-4_family-1	Unknown	1844
MP_V2_GENOME_10225	19060	19144	+	AT_rich	Low_complexity	1845
MP_V2_GENOME_10225	19292	19327	+	(TA)n	Simple_repeat	1846
MP_V2_GENOME_10225	19331	19397	+	AT_rich	Low_complexity	1847
MP_V2_GENOME_10225	19413	19488	+	(TAA)n	Simple_repeat	1848
MP_V2_GENOME_10225	20112	20131	+	(TA)n	Simple_repeat	1849
MP_V2_GENOME_10225	20381	20405	+	AT_rich	Low_complexity	1850
MP_V2_GENOME_10225	20656	20719	+	AT_rich	Low_complexity	1851
MP_V2_GENOME_10226	1	179	+	rnd-6_family-6719	Unknown	1852
MP_V2_GENOME_10226	131	228	-	rnd-1_family-169	Unknown	1853
MP_V2_GENOME_10226	437	569	+	rnd-3_family-181	Unknown	1854
MP_V2_GENOME_10226	623	1379	+	rnd-5_family-2664	LTR/Gypsy	1855
MP_V2_GENOME_10227	2	123	-	rnd-6_family-3671	Unknown	1856
MP_V2_GENOME_10227	498	616	-	rnd-1_family-44	LTR/Gypsy	1857
MP_V2_GENOME_10228	768	791	+	(TTTA)n	Simple_repeat	1858
MP_V2_GENOME_10228	1672	1796	+	rnd-1_family-169	Unknown	1859
MP_V2_GENOME_10228	1792	1868	+	rnd-4_family-1735	Unknown	1860
MP_V2_GENOME_10228	1990	2157	+	rnd-1_family-147	Unknown	1861
MP_V2_GENOME_10228	2169	2265	+	rnd-4_family-413	Unknown	1862
MP_V2_GENOME_10228	2185	2266	-	rnd-4_family-1735	Unknown	1863
MP_V2_GENOME_10228	2278	2384	-	rnd-1_family-169	Unknown	1864
MP_V2_GENOME_10228	2714	2831	+	rnd-4_family-313	Unknown	1865
MP_V2_GENOME_10228	4215	4381	-	rnd-6_family-1864	Unknown	1866
MP_V2_GENOME_10228	4458	4848	+	rnd-6_family-6404	Unknown	1867
MP_V2_GENOME_10228	5759	6517	+	rnd-5_family-5014	LTR/Copia	1868
MP_V2_GENOME_10228	6718	7057	+	rnd-1_family-223	LTR/Copia	1869
MP_V2_GENOME_10228	7091	7293	+	rnd-5_family-5014	LTR/Copia	1868
MP_V2_GENOME_10228	7307	7485	+	rnd-1_family-257	LTR/Copia	1870
MP_V2_GENOME_10228	7549	8034	+	rnd-1_family-178	LTR/Copia	1871
MP_V2_GENOME_10228	8463	10203	+	rnd-1_family-42	LTR/Copia	1872
MP_V2_GENOME_10228	10784	11197	-	rnd-4_family-1	Unknown	1873
MP_V2_GENOME_10228	13260	13440	+	AT_rich	Low_complexity	1874
MP_V2_GENOME_10228	14727	14884	+	rnd-4_family-3525	Unknown	1875
MP_V2_GENOME_10228	14923	15120	+	AT_rich	Low_complexity	1876
MP_V2_GENOME_10228	15494	15517	+	AT_rich	Low_complexity	1877
MP_V2_GENOME_10228	15734	15869	+	rnd-1_family-169	Unknown	1878
MP_V2_GENOME_10228	15870	15947	+	rnd-4_family-1735	Unknown	1879
MP_V2_GENOME_10228	15872	15967	-	rnd-4_family-413	Unknown	1880
MP_V2_GENOME_10228	16011	16168	-	rnd-1_family-147	Unknown	1881
MP_V2_GENOME_10228	16340	16471	-	rnd-1_family-169	Unknown	1882
MP_V2_GENOME_10228	16502	16620	+	AT_rich	Low_complexity	1883
MP_V2_GENOME_10228	16780	16884	-	rnd-5_family-1126	Unknown	1884
MP_V2_GENOME_10228	16936	17081	+	AT_rich	Low_complexity	1885
MP_V2_GENOME_10228	22563	22672	-	rnd-3_family-240	Unknown	1886
MP_V2_GENOME_10228	24777	25056	+	rnd-4_family-313	Unknown	1887
MP_V2_GENOME_10228	25063	25181	-	rnd-5_family-1602	Unknown	1888
MP_V2_GENOME_10228	25211	25230	+	(TA)n	Simple_repeat	1889
MP_V2_GENOME_10228	25501	25614	+	rnd-6_family-2611	Unknown	1890
MP_V2_GENOME_10228	25549	25804	-	rnd-5_family-1684	Unknown	1891
MP_V2_GENOME_10228	25831	25959	+	A-rich	Low_complexity	1892
MP_V2_GENOME_10228	26073	26243	+	AT_rich	Low_complexity	1893
MP_V2_GENOME_10228	26773	26912	-	rnd-3_family-240	Unknown	1894
MP_V2_GENOME_10228	28557	28746	+	rnd-5_family-5233	Unknown	1895
MP_V2_GENOME_10228	28749	28978	-	rnd-1_family-162	Unknown	1896
MP_V2_GENOME_10228	28979	28998	+	(TA)n	Simple_repeat	1897
MP_V2_GENOME_10228	28999	29243	-	rnd-1_family-162	Unknown	1896
MP_V2_GENOME_10228	29509	29660	-	rnd-5_family-1602	Unknown	1898
MP_V2_GENOME_10228	30585	30618	+	(TTTC)n	Simple_repeat	1899
MP_V2_GENOME_10228	31350	31446	-	rnd-4_family-313	Unknown	1900
MP_V2_GENOME_10228	31828	31850	+	AT_rich	Low_complexity	1901
MP_V2_GENOME_10228	36643	36953	-	rnd-4_family-465	LTR/Copia	1902
MP_V2_GENOME_10228	40261	40345	+	rnd-6_family-142	DNA/CMC-EnSpm	1903
MP_V2_GENOME_10228	40370	40731	+	rnd-3_family-36	Unknown	1904
MP_V2_GENOME_10228	40891	41585	-	rnd-5_family-2202	LTR/Gypsy	1905
MP_V2_GENOME_10228	41593	41673	+	rnd-1_family-110	Unknown	1906
MP_V2_GENOME_10228	41692	41919	+	rnd-5_family-2202	LTR/Gypsy	1907
MP_V2_GENOME_10228	42034	42265	-	rnd-5_family-8747	Unknown	1908
MP_V2_GENOME_10228	42282	42617	+	rnd-6_family-233	Unknown	1909
MP_V2_GENOME_10228	42760	43881	-	rnd-5_family-820	DNA/hAT-Ac	1910
MP_V2_GENOME_10228	43917	44231	-	rnd-5_family-2331	Unknown	1911
MP_V2_GENOME_10228	44791	44916	+	A-rich	Low_complexity	1912
MP_V2_GENOME_10228	45017	45160	-	rnd-5_family-2331	Unknown	1911
MP_V2_GENOME_10228	45046	45161	+	rnd-5_family-2331	Unknown	1913
MP_V2_GENOME_10228	45147	45229	+	rnd-1_family-315	Unknown	1914
MP_V2_GENOME_10228	45232	45300	+	rnd-5_family-4391	Unknown	1915
MP_V2_GENOME_10228	45293	45405	-	rnd-1_family-315	Unknown	1916
MP_V2_GENOME_10228	45395	46463	-	rnd-5_family-820	DNA/hAT-Ac	1910
MP_V2_GENOME_10228	46669	46693	+	(TTAA)n	Simple_repeat	1917
MP_V2_GENOME_10228	46893	46925	+	(TA)n	Simple_repeat	1918
MP_V2_GENOME_10228	47077	47372	-	rnd-6_family-3003	Unknown	1919
MP_V2_GENOME_10228	47375	47444	-	rnd-5_family-8747	Unknown	1920
MP_V2_GENOME_10228	47800	47923	-	rnd-5_family-42	LTR/Gypsy	1921
MP_V2_GENOME_10228	48377	48518	-	rnd-6_family-7089	Unknown	1922
MP_V2_GENOME_10228	48726	48808	-	rnd-6_family-7089	Unknown	1922
MP_V2_GENOME_10228	49504	49577	-	rnd-5_family-1656	LTR/Copia	1923
MP_V2_GENOME_10228	49582	49776	-	rnd-6_family-5269	DNA/hAT-Ac	1924
MP_V2_GENOME_10228	49808	50623	-	rnd-1_family-168	LTR/Copia	1925
MP_V2_GENOME_10228	50648	50818	-	rnd-1_family-119	LTR/Copia	1926
MP_V2_GENOME_10228	50845	51064	+	rnd-6_family-10110	Unknown	1927
MP_V2_GENOME_10228	51111	51170	+	rnd-4_family-204	Unknown	1928
MP_V2_GENOME_10228	51539	51663	-	rnd-1_family-167	DNA/CMC-EnSpm	1929
MP_V2_GENOME_10228	53569	53716	-	rnd-6_family-13715	Unknown	1930
MP_V2_GENOME_10228	54187	54267	+	T-rich	Low_complexity	1931
MP_V2_GENOME_10228	54966	55041	+	AT_rich	Low_complexity	1932
[truncated: 63,536 more rows]
