# Supplementary material for: Comprehensive analyses of genomes, transcriptomes and metabolites of neem tree
Source: PeerJ. 2015 Aug 6;3:e1066. doi: 10.7717/peerj.1066 (PMC4540028; doi:10.7717/peerj.1066)
Supplement: Table S15 [file peerj-03-1066-s015.xls]

## Sheet: Sheet1
Supplementary Table 15: The list of SSRs in genes of neem Genotype 1
Gene ID	SSR type	SSR	Size	Start	End	BLAST Description	GO Descripton	KEGG Description	EC Description
Ai02g14	p1	(T)10	10	673	682	-	-	-	-
Ai02g19	p3	(TCC)7	21	1	21	predicted protein [Populus trichocarpa]	"membrane"	-	-
Ai02g64	p1	(T)11	11	112	122	-	-	-	-
Ai02g93	p4	(GACA)6	24	489	512	hypothetical protein MTR_1g005670 [Medicago truncatula] gb|AES58556.1| hypothetical protein MTR_1g005670 [Medicago truncatula]	-	-	-
Ai02g97	p2	(CT)6	12	295	306	RNA-directed DNA polymerase (Reverse transcriptase); Ribonuclease H; Endonuclease/exonuclease/phosphatase [Medicago truncatula]	-	-	-
Ai02g98	p1	(A)10	10	1	10	NB-ARC domain-containing disease resistance protein, putative [Theobroma cacao]	-	-	-
Ai02g123	p3	(GAA)5	15	235	249	DNA-damage-inducible protein f, putative [Ricinus communis] gb|EEF49480.1| DNA-damage-inducible protein f, putative [Ricinus communis]	"membrane"	-	-
Ai02g180	p3	(ATG)7	21	480	500	flavodoxin family protein [Dimocarpus longan]	"catalytic activity"	-	-
Ai02g193	p3	(CTG)5	15	1085	1099	DENN (AEX-3) domain-containing protein isoform 1 [Theobroma cacao] gb|EOX94289.1| DENN (AEX-3) domain-containing protein isoform 1 [Theobroma cacao] gb|EOX94290.1| DENN (AEX-3) domain-containing protein isoform 1 [Theobroma cacao] gb|EOX94291.1| DENN (AEX-3) domain-containing protein isoform 1 [Theobroma cacao]	-	-	-
Ai02g194	p3	(GGA)8	24	174	197	PREDICTED: WD repeat-containing protein 70-like [Vitis vinifera]	"neurogenesis"	"Spliceosome"	"Non-specificserine/threonineproteinkinase."
Ai02g200	p3	(TGA)6	18	453	470	-	-	-	-
Ai02g310	p1	(A)10	10	2193	2202	Pre-rRNA-processing protein TSR1 isoform 1 [Theobroma cacao]	"ribosome biogenesis"	"Ribosome biogenesis in eukaryotes"	-
Ai02g319	p2	(GA)6	12	714	725	unnamed protein product [Vitis vinifera]	"DNA binding"	"mRNA surveillance pathway"	-
Ai02g383	p3	(GCT)5	15	6391	6405	G2484-1 protein, putative isoform 5 [Theobroma cacao]	"membrane"	-	-
Ai02g385	p3	(TCT)5	15	19	33	hypothetical protein VITISV_025072 [Vitis vinifera]	"callose deposition in cell wall"	"NOD-like receptor signaling pathway"	-
Ai02g412	p3	(TTC)5	15	2043	2057	Uncharacterized protein TCM_034839 [Theobroma cacao]	"nucleotide binding"	-	-
Ai02g415	p6	(CCATCA)5	30	19	48	-	-	-	-
Ai02g445	p3	(GAT)5	15	601	615	Uncharacterized protein TCM_015393 [Theobroma cacao]	-	-	-
Ai02g510	p3	(TTC)6	18	20	37	Uncharacterized protein TCM_001076 [Theobroma cacao]	"biological_process"	-	-
Ai02g523	p3	(TCT)6	18	7	24	alpha-glucosidase, putative [Ricinus communis] gb|EEF30763.1| alpha-glucosidase, putative [Ricinus communis]	"starch metabolic process"	"N-Glycan biosynthesis"	"Alpha-glucosidase."
Ai02g606	p1	(T)10	10	434	443	Maturase [Medicago truncatula] gb|AES58602.1| Maturase [Medicago truncatula]	"metabolic process"	-	"RNA-directedDNApolymerase."
Ai02g760	p1	(A)11	11	1880	1890	Uncharacterized protein TCM_019417 [Theobroma cacao]	"transposition"	-	-
Ai02g777	p3	(TGG)5	15	87	101	conserved hypothetical protein [Ricinus communis] gb|EEF48918.1| conserved hypothetical protein [Ricinus communis]	-	-	-
Ai02g795	p3	(CAA)9	27	219	245	-	-	-	-
Ai02g812	p3	(CTG)5	15	1334	1348	Polypyrimidine tract-binding protein 1 isoform 1 [Theobroma cacao]	"pollen germination"	-	-
Ai02g815	c	(AGA)10gtggattggtgaggaagaatttgatgaggaggagaaagttgaagaagaatacgatgaagatgaagatgaagat(GAG)7	124	786	909	Uncharacterized protein TCM_004392 [Theobroma cacao]	"biological_process"	-	-
Ai02g830	p3	(GAA)6	18	55	72	Squamosa promoter binding protein-like 3 [Theobroma cacao]	"response to brassinosteroid stimulus"	-	-
Ai02g874	p3	(CGG)5	15	201	215	predicted protein [Populus trichocarpa] gb|EEE98761.1| cystatin family protein [Populus trichocarpa]	"negative regulation of peptidase activity"	-	-
Ai02g919	p3	(GTG)5	15	2150	2164	Uncharacterized protein TCM_000919 [Theobroma cacao]	-	-	-
Ai02g955	c	(GAA)5(GAT)6	33	1483	1515	Skp2-like, FIST C domain, FIST domain, N-terminal isoform 1 [Theobroma cacao]	"biological_process"	-	-
Ai02g962	p3	(AAG)5	15	375	389	Uncharacterized protein TCM_008922 [Theobroma cacao]	-	-	-
Ai02g978	p3	(GGA)6	18	121	138	hypothetical protein PRUPE_ppa006097mg [Prunus persica]	"DNA binding"	-	-
Ai02g999	p3	(TCA)8	24	25	48	-	-	-	-
Ai02g1000	p3	(TCA)9	27	25	51	-	-	-	-
Ai02g1001	p3	(GGA)6	18	561	578	hypothetical protein VITISV_011280 [Vitis vinifera]	-	-	-
Ai02g1018	c	(CAA)5ccacacatttcatcatctgcggttttcactgtgaattcacaaattccaggtaatctttccatggaatttggaccacctgttctcacatta(CCT)5	120	318	437	PREDICTED: transcription factor MYB23-like [Vitis vinifera] emb|CAN83435.1| hypothetical protein VITISV_010137 [Vitis vinifera]	"DNA binding"	-	-
Ai02g1021	p3	(TGA)5	15	639	653	GTP-binding nuclear protein Ran-3 [Phaseolus vulgaris] gb|AGV54647.1| Ras-like GTP-binding protein 3G-1 [Phaseolus vulgaris]	"protein transport"	"RNA transport"	-
Ai02g1098	p3	(GAT)6	18	2248	2265	PREDICTED: SUMO-activating enzyme subunit 2-like [Vitis vinifera]	"catalytic activity"	"Ubiquitin mediated proteolysis"	-
Ai02g1119	p3	(ATC)6	18	232	249	-	-	-	-
Ai02g1124	p3	(GAT)5	15	2266	2280	Nuclear protein X1 isoform 1 [Theobroma cacao]	"response to salt stress"	-	-
Ai02g1147	p3	(AAG)7	21	1039	1059	Eukaryotic translation initiation factor 2 family protein isoform 2 [Theobroma cacao]	"cytoplasm"	"RNA transport"	-
Ai02g1147	p3	(AAG)7	21	1261	1281	Eukaryotic translation initiation factor 2 family protein isoform 2 [Theobroma cacao]	"cytoplasm"	"RNA transport"	-
Ai02g1183	p3	(TGG)5	15	270	284	-	-	-	-
Ai02g1188	p3	(AAG)9	27	1	27	Auxin efflux carrier family protein isoform 1 [Theobroma cacao] gb|EOY04041.1| Auxin efflux carrier family protein isoform 1 [Theobroma cacao] gb|EOY04042.1| Auxin efflux carrier family protein isoform 1 [Theobroma cacao] gb|EOY04043.1| Auxin efflux carrier family protein isoform 1 [Theobroma cacao]	-	-	-
Ai02g1192	p3	(TTC)6	18	63	80	-	-	-	-
Ai02g1222	p3	(TTC)6	18	105	122	hypothetical protein PRUPE_ppa007721mg [Prunus persica]	"methylation"	-	-
Ai02g1228	p3	(ACC)7	21	1	21	predicted protein [Populus trichocarpa]	"actin filament binding"	"Wnt signaling pathway"	-
Ai02g1271	p3	(TTC)5	15	411	425	argonaute protein group [Populus trichocarpa] gb|EEE88272.1| argonaute family protein [Populus trichocarpa]	"stamen development"	-	-
Ai02g1299	p3	(TCA)6	18	10	27	Galactose-1-phosphate uridylyltransferase [Theobroma cacao]	"positive regulation of cellular response to phosphate starvation"	"Galactose metabolism"	"UDP-glucose--hexose-1-phosphateuridylyltransferase."
Ai02g1306	p3	(GAA)6	18	1081	1098	hypothetical protein PRUPE_ppa015099mg [Prunus persica]	-	-	-
Ai02g1317	p3	(GCC)5	15	8	22	-	-	-	-
Ai02g1317	p3	(CAC)7	21	175	195	-	-	-	-
Ai02g1331	p3	(CTT)5	15	539	553	Pollen-specific protein SF3, putative [Ricinus communis] gb|EEF50497.1| Pollen-specific protein SF3, putative [Ricinus communis]	"zinc ion binding"	-	-
Ai02g1335	p3	(GGT)5	15	61	75	HEAT repeat-containing protein, putative isoform 1 [Theobroma cacao]	-	-	-
Ai02g1346	p3	(GAG)5	15	250	264	hypothetical protein VITISV_019937 [Vitis vinifera]	"intracellular"	"Spliceosome"	"Ubiquitinylhydrolase1."
Ai02g1400	p3	(GAA)5	15	140	154	ABC transporter of the mitochondrion 3 isoform 3 [Theobroma cacao]	"membrane"	"ABC transporters"	-
Ai02g1424	p3	(CAG)9	27	304	330	PREDICTED: DAZ-associated protein 1-like [Vitis vinifera]	-	-	-
Ai02g1425	p3	(GAT)5	15	289	303	-	-	-	-
Ai02g1480	p3	(CCG)6	18	11	28	hypothetical protein PRUPE_ppa004367m2g, partial [Prunus persica]	-	-	-
Ai02g1482	p3	(CTT)8	24	149	172	PREDICTED: transcription factor bHLH68 [Vitis vinifera] emb|CBI28038.3| unnamed protein product [Vitis vinifera]	"DNA binding"	-	-
Ai02g1509	p3	(AAG)9	27	1	27	Cleft lip and palate transmembrane protein, putative [Ricinus communis] gb|EEF44529.1| Cleft lip and palate transmembrane protein, putative [Ricinus communis]	"membrane"	-	-
Ai02g1511	c	(AGC)6aggagttggagccatggatgaattgggagct(AAG)5	64	39	102	-	-	-	-
Ai02g1523	p3	(GAC)5	15	331	345	-	-	-	-
Ai02g1567	p3	(GAC)5	15	217	231	Uncharacterized protein TCM_025951 [Theobroma cacao]	-	-	-
Ai02g1627	p3	(ATC)7	21	830	850	AP2/B3-like transcriptional factor family protein, putative [Theobroma cacao]	"flower development"	-	-
Ai02g1658	p3	(TGG)5	15	208	222	-	-	-	-
Ai02g1710	p3	(GAG)8	24	271	294	calcium binding protein/cast, putative [Ricinus communis] gb|EEF42084.1| calcium binding protein/cast, putative [Ricinus communis]	"biological_process"	"Plant-pathogen interaction"	-
Ai02g1728	p3	(TCC)7	21	162	182	-	-	-	-
Ai02g1751	p3	(TAC)6	18	270	287	PREDICTED: E3 ubiquitin-protein ligase RNF181-like [Glycine max]	"ligase activity"	-	-
Ai02g1752	p3	(ATG)6	18	1	18	predicted protein [Populus trichocarpa]	-	-	-
Ai02g1796	p3	(TTC)10	30	72	101	-	-	-	-
Ai02g1805	c	(CAC)5cataataaccactaccccctacctcctcgacctcaagtg(CCT)9	81	41	121	Cyclin-related, putative isoform 2 [Theobroma cacao]	-	-	-
Ai02g1819	p5	(CTCAT)5	25	1478	1502	YUP8H12.11 protein, putative [Theobroma cacao]	"membrane"	"Leishmaniasis"	"Non-specificserine/threonineproteinkinase."
Ai02g1891	p3	(CAG)7	21	564	584	cytochrome P450, putative [Ricinus communis] gb|EEF29373.1| cytochrome P450, putative [Ricinus communis]	"membrane"	"Brassinosteroid biosynthesis"	"(+)-abscisicacid8{prime}-hydroxylase."
Ai02g1903	p3	(GAG)5	15	200	214	PREDICTED: homeobox protein knotted-1-like 3-like [Glycine max]	"DNA binding"	-	-
Ai02g1918	p3	(GAA)11	33	1795	1827	Mitochondrial substrate carrier family protein isoform 1 [Theobroma cacao]	"molecular_function"	-	-
Ai02g1920	p3	(TGA)9	27	984	1010	PREDICTED: zinc finger CCCH domain-containing protein 11-like [Cucumis sativus] ref|XP_004163072.1| PREDICTED: zinc finger CCCH domain-containing protein 11-like [Cucumis sativus]	"biological_process"	-	-
Ai02g1923	p3	(TGG)5	15	453	467	PREDICTED: 50S ribosomal protein L4, chloroplastic-like [Fragaria vesca subsp. vesca]	"membrane"	-	-
Ai02g1934	p3	(CAA)6	18	48	65	Lateral root primordium protein-related, putative [Theobroma cacao]	-	-	-
Ai02g1934	p3	(CAA)6	18	202	219	Lateral root primordium protein-related, putative [Theobroma cacao]	-	-	-
Ai02g1964	p3	(GAA)8	24	502	525	hypothetical protein VITISV_036406 [Vitis vinifera]	"DNA binding"	-	-
Ai02g1984	p3	(AGA)9	27	292	318	conserved hypothetical protein [Ricinus communis] gb|EEF48682.1| conserved hypothetical protein [Ricinus communis]	"biological_process"	-	-
Ai02g1984	p3	(CAA)6	18	709	726	conserved hypothetical protein [Ricinus communis] gb|EEF48682.1| conserved hypothetical protein [Ricinus communis]	"biological_process"	-	-
Ai02g1999	p3	(TGG)5	15	669	683	PREDICTED: uncharacterized protein LOC100247751 [Vitis vinifera]	-	-	-
Ai02g2076	c	(GTG)5gagaaggaggatttgatgatggtggtggtgctggtgataaccaacaatagaaaaggatttgatgaggag(GGT)5	99	67	165	-	-	-	-
Ai02g2165	p3	(TCT)7	21	127	147	-	-	-	-
Ai02g2177	p3	(CAG)5	15	792	806	PREDICTED: uncharacterized protein At5g39570-like isoform X2 [Cicer arietinum]	"biological_process"	-	-
Ai02g2179	p3	(GAT)6	18	442	459	predicted protein [Arabidopsis lyrata subsp. lyrata] gb|EFH47033.1| predicted protein [Arabidopsis lyrata subsp. lyrata]	"biological_process"	-	-
Ai02g2180	p3	(ATG)5	15	2654	2668	F28J7.14 protein, putative isoform 1 [Theobroma cacao] gb|EOY02734.1| F28J7.14 protein, putative isoform 1 [Theobroma cacao]	-	-	-
Ai02g2187	c	(CTT)5cgtctcctatgtcttctttgtattcttcttcttcgtcttccgccagcatcattcctcgaaaca(TTC)5tacttgtt(CTC)8	125	6	130	hypothetical protein VITISV_009242 [Vitis vinifera]	"cytoplasm"	-	-
Ai02g2194	p3	(GTG)5	15	26	40	-	-	-	-
Ai02g2196	p3	(TGA)5	15	648	662	PREDICTED: magnesium transporter MRS2-I-like [Fragaria vesca subsp. vesca]	"membrane"	-	-
Ai02g2229	p1	(A)10	10	125	134	hypothetical protein AMTR_s00012p00184530 [Amborella trichopoda]	"membrane"	"Alzheimers disease"	"H(+)-transportingtwo-sectorATPase."
Ai02g2255	p3	(GCA)8	24	110	133	Serine carboxypeptidase S28 family protein [Theobroma cacao]	"peptidase activity"	-	"Dipeptidyl-peptidaseII."
Ai02g2288	p3	(TCA)5	15	16	30	AP2-like ethylene-responsive transcription factor AIL6 [Theobroma cacao]	"phyllotactic patterning"	-	-
Ai02g2311	p3	(GCC)5	15	2680	2694	PREDICTED: ubiquitin carboxyl-terminal hydrolase 9-like [Vitis vinifera]	"peptidase activity"	-	"Ubiquitinylhydrolase1."
Ai02g2352	p3	(TTC)10	30	252	281	Integrase-type DNA-binding superfamily protein, putative [Theobroma cacao]	"response to glucose stimulus"	-	-
Ai02g2352	p3	(TCC)8	24	1098	1121	Integrase-type DNA-binding superfamily protein, putative [Theobroma cacao]	"response to glucose stimulus"	-	-
Ai02g2355	p3	(GAA)5	15	199	213	-	-	-	-
Ai02g2363	p3	(GGT)6	18	676	693	predicted protein [Populus trichocarpa]	"extracellular region"	"Pentose and glucuronate interconversions"	"Pectinesterase."
Ai02g2377	p2	(AG)6	12	7	18	Eukaryotic translation initiation factor 3 subunit K isoform 1 [Theobroma cacao]	"cytoplasm"	-	-
Ai02g2465	p3	(CCT)6	18	44	61	KAR-UP F-box 1, putative [Theobroma cacao]	"response to karrikin"	-	-
Ai02g2469	p3	(TCC)5	15	1021	1035	Formin [Theobroma cacao]	"membrane"	"Dorso-ventral axis formation"	-
Ai02g2495	p3	(TCT)5	15	916	930	PREDICTED: myosin-J heavy chain-like, partial [Cucumis sativus]	"actin filament binding"	-	"Non-specificserine/threonineproteinkinase."
Ai02g2514	p3	(GAA)5	15	510	524	PREDICTED: ent-kaurenoic acid oxidase 2-like [Fragaria vesca subsp. vesca]	"gibberellin biosynthetic process"	"Brassinosteroid biosynthesis"	"Ent-kaurenoicacidoxidase."
Ai02g2529	p3	(GAA)5	15	739	753	tir-nbs-lrr resistance protein [Populus trichocarpa]	"cytoplasm"	-	-
Ai02g2530	c	(GAA)5gaggaagag(GAA)5	39	286	324	hypothetical protein VITISV_027841 [Vitis vinifera]	"cytoplasm"	-	"Non-specificserine/threonineproteinkinase."
Ai02g2531	p3	(AGA)5	15	198	212	hypothetical protein POPTR_0019s09630g [Populus trichocarpa]	"intracellular"	-	-
Ai02g2541	p3	(CGC)5	15	43	57	-	-	-	-
Ai02g2541	p3	(CCT)5	15	168	182	-	-	-	-
Ai02g2543	p3	(CGA)5	15	309	323	PREDICTED: uncharacterized protein LOC100258381 [Vitis vinifera]	-	-	-
Ai02g2550	p3	(TGA)7	21	1302	1322	Uncharacterized protein TCM_007942 [Theobroma cacao]	-	-	-
Ai02g2553	p3	(TTC)5	15	84	98	Vesicle-associated protein 4-2 [Theobroma cacao]	"protein targeting to vacuole"	-	-
Ai02g2554	p3	(TCA)9	27	181	207	-	-	-	-
Ai02g2579	p3	(TCT)7	21	1048	1068	Integrase-type DNA-binding superfamily protein, putative [Theobroma cacao]	"DNA binding"	-	-
Ai02g2583	p3	(ACA)5	15	306	320	PREDICTED: cytochrome b5-like [Hydra magnipapillata]	"mitochondrial inner membrane"	-	"Nitratereductase(NADH)."
Ai02g2616	p3	(GAA)5	15	508	522	Domain of Uncharacterized protein function, putative isoform 1 [Theobroma cacao]	-	-	-
Ai02g2710	p2	(CT)9	18	832	849	PREDICTED: uncharacterized protein LOC101293221 [Fragaria vesca subsp. vesca]	-	-	-
Ai02g2724	p3	(GAT)9	27	1393	1419	hypothetical protein PRUPE_ppa015585mg [Prunus persica]	"DNA binding"	"Wnt signaling pathway"	"[Myosinheavy-chain]kinase."
Ai02g2736	p3	(TCA)10	30	66	95	PREDICTED: transcription factor ORG2-like [Cicer arietinum]	-	-	-
Ai02g2741	p3	(GGA)6	18	600	617	hypothetical protein POPTR_0012s09630g [Populus trichocarpa]	"protein kinase activity"	-	"[RNA-polymerase]-subunitkinase."
Ai02g2772	p3	(AGG)5	15	22	36	hypothetical protein PRUPE_ppa004350mg [Prunus persica]	"vegetative to reproductive phase transition of meristem"	-	"[RNA-polymerase]-subunitkinase."
Ai02g2778	p3	(AGA)5	15	183	197	-	-	-	-
Ai02g2813	p3	(TGA)5	15	237	251	Chaperone DnaJ-domain superfamily protein, putative isoform 1 [Theobroma cacao] gb|EOY01602.1| Chaperone DnaJ-domain superfamily protein, putative isoform 1 [Theobroma cacao]	-	-	-
Ai02g2820	p3	(CAT)5	15	14	28	ABA 8'-hydroxylase [Citrus sinensis]	"monooxygenase activity"	"Brassinosteroid biosynthesis"	"(+)-abscisicacid8{prime}-hydroxylase."
Ai02g2822	p3	(TGG)7	21	879	899	hypothetical protein PRUPE_ppa001491mg [Prunus persica]	"peptidase activity"	-	"Microtubule-severingATPase."
Ai02g2854	p3	(CCT)10	30	583	612	LOB domain-containing protein 15, putative [Theobroma cacao]	"biological_process"	-	-
Ai02g2874	p3	(AGG)6	18	108	125	-	-	-	-
Ai02g2917	p3	(AGG)5	15	275	289	-	-	-	-
Ai02g2922	p2	(GA)6	12	2239	2250	Glycosyl transferase family 1 protein isoform 1 [Theobroma cacao]	-	-	-
Ai02g2953	p3	(GCT)5	15	1804	1818	BEL1-like homeodomain protein 6 isoform 1 [Theobroma cacao] gb|EOX97923.1| BEL1-like homeodomain protein 6 isoform 1 [Theobroma cacao]	"DNA binding"	-	-
Ai02g2968	p3	(TCT)7	21	52	72	Peroxin 5 isoform 1 [Theobroma cacao]	"cytoplasm"	"Peroxisome"	-
Ai02g2989	p6	(GCCACA)5	30	489	518	PREDICTED: DNA-3-methyladenine glycosylase 1-like isoform X1 [Cicer arietinum]	"catalytic activity"	-	"DNA-3-methyladenineglycosylaseII."
Ai02g2998	p3	(CTT)5	15	125	139	predicted protein [Populus trichocarpa]	"2 iron	-	"Cholinemonooxygenase."
Ai02g3025	p3	(TCT)5	15	1012	1026	PREDICTED: laccase-14-like [Vitis vinifera]	"copper ion binding"	-	"Laccase."
Ai02g3052	c	(CAA)9cggcaacacgagcaacaattctt(CTG)6	68	51	118	-	-	-	-
Ai02g3084	p3	(CAG)5	15	3214	3228	hypothetical protein PRUPE_ppa000421mg [Prunus persica]	"nucleobase-containing compound metabolic process"	-	"mRNA(2{prime}-O-methyladenosine-N(6)-)-methyltransferase."
Ai02g3100	p3	(AGT)6	18	703	720	predicted protein [Populus trichocarpa] gb|EEF01791.1| hypothetical protein POPTR_0010s06790g [Populus trichocarpa]	-	-	-
Ai02g3137	p3	(TCC)5	15	50	64	fasciclin-like arabinogalactan protein 19 [Gossypium hirsutum]	"root hair elongation"	-	-
Ai02g3140	p3	(TGA)5	15	2019	2033	ATP binding protein, putative isoform 1 [Theobroma cacao]	"protein kinase activity"	"Regulation of autophagy"	"Non-specificserine/threonineproteinkinase."
Ai02g3178	p2	(AT)6	12	1823	1834	Major facilitator superfamily protein isoform 1 [Theobroma cacao] gb|EOY07380.1| Major facilitator superfamily protein isoform 1 [Theobroma cacao]	"plasma membrane"	"Protein digestion and absorption"	-
Ai02g3183	p3	(AGG)11	33	35	67	-	-	-	-
Ai02g3200	p3	(TAC)5	15	102	116	-	-	-	-
Ai02g3206	p3	(TGA)5	15	330	344	hypothetical protein PRUPE_ppa022408mg, partial [Prunus persica]	-	-	-
Ai02g3209	p3	(AGT)6	18	346	363	PREDICTED: receptor-like serine/threonine-protein kinase ALE2 [Vitis vinifera] emb|CBI36744.3| unnamed protein product [Vitis vinifera]	"protein kinase activity"	"Plant-pathogen interaction"	"Non-specificserine/threonineproteinkinase."
Ai02g3226	p1	(T)11	11	425	435	PREDICTED: probable carboxylesterase 1-like [Glycine max]	-	-	-
Ai02g3243	p3	(CAC)10	30	1	30	Tudor/PWWP/MBT superfamily protein, putative [Theobroma cacao]	-	-	-
Ai02g3252	p3	(AGT)5	15	419	433	Serine/threonine-protein kinase-like protein, putative [Theobroma cacao]	"protein kinase activity"	-	"Non-specificserine/threonineproteinkinase."
Ai02g3274	p3	(AGA)9	27	132	158	-	-	-	-
Ai02g3303	p3	(AAG)6	18	427	444	hypothetical protein PRUPE_ppa012831mg [Prunus persica]	-	-	-
Ai02g3312	p3	(ATC)5	15	260	274	hypothetical protein VITISV_035034 [Vitis vinifera]	-	-	-
Ai02g3330	p3	(AGA)5	15	402	416	Cyclin b1,5 isoform 1 [Theobroma cacao]	"cell division"	"Cell cycle"	-
Ai02g3339	p3	(CAG)7	21	79	99	predicted protein [Populus trichocarpa]	-	-	-
Ai02g3347	p3	(TGG)5	15	491	505	Uncharacterized protein TCM_006485 [Theobroma cacao]	"protein kinase activity"	"Plant hormone signal transduction"	"Non-specificserine/threonineproteinkinase."
Ai02g3366	p3	(AGA)8	24	1593	1616	Calmodulin binding protein, putative [Theobroma cacao]	-	-	-
Ai02g3376	p3	(CAT)7	21	1432	1452	ABI3, putative isoform 5 [Theobroma cacao]	"cytoplasm"	-	-
Ai02g3410	p3	(AAT)7	21	118	138	predicted protein [Populus trichocarpa]	"response to insect"	-	-
Ai02g3421	p3	(TGC)5	15	2706	2720	PREDICTED: peroxisome biogenesis protein 1-like [Vitis vinifera]	"cytoplasm"	"Protein processing in endoplasmic reticulum"	"Microtubule-severingATPase."
Ai02g3433	p3	(CAT)6	18	317	334	protein transporter, putative [Ricinus communis] gb|EEF42056.1| protein transporter, putative [Ricinus communis]	-	-	-
Ai02g3436	p3	(CTG)6	18	86	103	-	-	-	-
Ai02g3443	p3	(TCT)6	18	60	77	predicted protein [Populus trichocarpa] gb|EEE98055.1| hypothetical protein POPTR_0011s10740g [Populus trichocarpa]	-	-	-
Ai02g3447	p3	(CTT)7	21	593	613	GATA domain class transcription factor [Malus domestica]	"DNA binding"	-	-
Ai02g3463	p3	(ATC)5	15	1062	1076	PREDICTED: probable leucine-rich repeat receptor-like protein kinase At1g35710-like [Vitis vinifera]	"protein kinase activity"	"Plant hormone signal transduction"	"Non-specificserine/threonineproteinkinase."
Ai02g3472	p3	(GAA)10	30	73	102	-	-	-	-
Ai02g3473	p3	(GAC)5	15	1	15	conserved hypothetical protein [Ricinus communis] gb|EEF38371.1| conserved hypothetical protein [Ricinus communis]	"ion channel activity"	-	-
Ai02g3478	p3	(CAG)5	15	718	732	ABA responsive element binding factor [Citrus trifoliata]	"DNA binding"	"Plant hormone signal transduction"	-
Ai02g3508	p3	(GAG)5	15	595	609	ARM repeat superfamily protein isoform 2, partial [Theobroma cacao]	"protein transport"	-	-
Ai02g3547	p3	(AGC)7	21	95	115	PREDICTED: peptidyl-tRNA hydrolase, chloroplastic-like [Vitis vinifera]	"aminoacyl-tRNA hydrolase activity"	-	"Aminoacyl-tRNAhydrolase."
Ai02g3567	p6	(TCTTCC)6	36	7	42	hypothetical protein POPTR_0077s002001g, partial [Populus trichocarpa]	"cytoplasm"	-	-
Ai02g3582	p3	(CAA)6	18	1268	1285	PREDICTED: zinc finger protein NUTCRACKER isoform 2 [Vitis vinifera]	"intracellular"	-	-
Ai02g3597	p3	(TTC)5	15	105	119	PREDICTED: uncharacterized protein LOC100261004 [Vitis vinifera] emb|CBI27913.3| unnamed protein product [Vitis vinifera]	"glucose mediated signaling pathway"	-	-
Ai02g3597	p3	(GCA)5	15	655	669	PREDICTED: uncharacterized protein LOC100261004 [Vitis vinifera] emb|CBI27913.3| unnamed protein product [Vitis vinifera]	"glucose mediated signaling pathway"	-	-
Ai02g3634	p3	(CTG)5	15	314	328	WRKY transcription factor 58 [Jatropha curcas]	-	-	-
Ai02g3635	p3	(TGG)5	15	239	253	-	-	-	-
Ai02g3642	p3	(CAA)6	18	450	467	-	-	-	-
Ai02g3663	p3	(CAT)5	15	34	48	Uncharacterized protein TCM_005501 [Theobroma cacao]	-	-	-
Ai02g3705	p3	(AGA)5	15	497	511	RecName: Full=60S ribosomal protein L6; AltName: Full=YL16-like emb|CAA49175.1| ribosomal protein YL16 [Mesembryanthemum crystallinum]	"structural constituent of ribosome"	"Ribosome"	-
Ai02g3718	p3	(GAT)5	15	1573	1587	PREDICTED: uncharacterized protein LOC101309725 [Fragaria vesca subsp. vesca]	"regulation of alternative nuclear mRNA splicing	"Spliceosome"	-
Ai02g3723	p3	(AAG)9	27	50	76	JHL18I08.14 [Jatropha curcas]	-	-	-
Ai02g3723	c	(CAG)5(CAA)7	36	451	486	JHL18I08.14 [Jatropha curcas]	-	-	-
Ai02g3772	p3	(TGG)5	15	753	767	Uncharacterized protein TCM_004165 [Theobroma cacao]	-	-	-
Ai02g3789	p1	(T)14	14	1	14	Inter-alpha-trypsin inhibitor heavy chain-related, putative [Theobroma cacao]	"negative regulation of peptidase activity"	-	-
Ai02g3792	p3	(GAG)5	15	157	171	hypothetical protein PRUPE_ppa000536mg [Prunus persica]	"ubiquitin conjugating enzyme binding"	"Protein processing in endoplasmic reticulum"	-
Ai02g3796	p3	(CAG)5	15	1091	1105	PREDICTED: uncharacterized protein LOC101207147 [Cucumis sativus]	"mitochondrion"	-	-
Ai02g3826	p3	(GAT)5	15	482	496	hypothetical protein PRUPE_ppa001926mg [Prunus persica]	"starch biosynthetic process"	-	-
Ai02g3837	p3	(ATC)6	18	812	829	WRKY DNA-binding protein 28 [Theobroma cacao]	"DNA binding"	"Plant-pathogen interaction"	-
Ai02g3849	p3	(GGC)5	15	105	119	-	-	-	-
Ai02g3865	p3	(CAA)8	24	120	143	Uncharacterized protein TCM_030343 [Theobroma cacao]	-	-	-
Ai02g3872	p3	(CAT)7	21	922	942	hypothetical protein VITISV_038350 [Vitis vinifera]	-	-	-
Ai02g3875	p3	(CTC)6	18	44	61	-	-	-	-
Ai02g3887	p2	(GA)8	16	11	26	-	-	-	-
Ai02g3890	p3	(CGA)5	15	653	667	Ethylene-responsive element binding protein, putative [Theobroma cacao]	"cytoplasm"	-	-
Ai02g3908	p3	(CGT)5	15	389	403	GTP binding protein, putative [Ricinus communis] gb|EEF42300.1| GTP binding protein, putative [Ricinus communis]	"biological_process"	-	-
Ai02g3943	p3	(AGC)6	18	606	623	cytochrome P450 [Populus trichocarpa] gb|ERP48562.1| hypothetical protein POPTR_0021s00980g [Populus trichocarpa]	"monooxygenase activity"	"Brassinosteroid biosynthesis"	"(+)-abscisicacid8{prime}-hydroxylase."
Ai02g3953	p3	(AGA)6	18	1893	1910	polyprotein [Cacao swollen shoot virus]	"peptidase activity"	-	"RNA-directedDNApolymerase."
Ai02g3955	p3	(ATG)6	18	206	223	Mutator transposable element, putative [Solanum demissum]	-	-	-
Ai02g3957	p3	(GTT)5	15	168	182	Patellin-5, putative [Ricinus communis] gb|EEF40608.1| Patellin-5, putative [Ricinus communis]	"cytoplasm"	-	-
Ai02g3958	c	(CCA)5cctccgccgccagctaaagagg(AAGAGA)5	67	337	403	Patellin-3, putative [Ricinus communis] gb|EEF40611.1| Patellin-3, putative [Ricinus communis]	"cytoplasm"	-	-
Ai02g3960	p2	(AT)7	14	139	152	Major facilitator superfamily protein isoform 1 [Theobroma cacao]	"transport"	"Protein digestion and absorption"	-
Ai02g3974	p3	(CCA)9	27	2203	2229	conserved hypothetical protein [Ricinus communis] gb|EEF38005.1| conserved hypothetical protein [Ricinus communis]	"chloroplast relocation"	-	-
Ai02g3977	p2	(AG)6	12	1512	1523	B-S glucosidase 44 [Theobroma cacao]	"beta-L-arabinosidase activity"	"Phenylpropanoid biosynthesis"	"Beta-glucosidase."
Ai02g3991	p6	(CTGCTT)5	30	29	58	TPX2 family protein, putative isoform 1 [Theobroma cacao]	-	-	-
Ai02g4000	p3	(GGT)5	15	1	15	PREDICTED: dof zinc finger protein DOF5.4-like [Vitis vinifera]	-	-	-
Ai02g4008	p3	(GGA)8	24	571	594	homeobox protein, putative [Ricinus communis] gb|EEF34692.1| homeobox protein, putative [Ricinus communis]	"DNA binding"	-	-
Ai02g4024	p6	(AGAAGC)5	30	435	464	PREDICTED: cyclin-dependent kinase inhibitor 1-like [Vitis vinifera]	"DNA endoreduplication"	-	-
Ai02g4027	p3	(ATC)8	24	135	158	Chaperone DnaJ-domain superfamily protein [Theobroma cacao]	-	-	-
Ai02g4032	p3	(GCA)5	15	706	720	PREDICTED: zinc finger protein ZAT5 [Vitis vinifera]	"vegetative to reproductive phase transition of meristem"	-	-
Ai02g4069	p3	(TTC)6	18	78	95	Target of rapamycin [Theobroma cacao]	"phosphotransferase activity	"Insulin signaling pathway"	"Non-specificserine/threonineproteinkinase."
Ai02g4099	p3	(AGC)6	18	36	53	PREDICTED: putative invertase inhibitor-like [Vitis vinifera]	-	-	-
Ai02g4102	p3	(CTG)5	15	935	949	predicted protein [Populus trichocarpa] gb|EEE88339.1| hypothetical protein POPTR_0008s01440g [Populus trichocarpa]	-	-	-
Ai02g4109	p3	(TGA)5	15	390	404	predicted protein [Populus trichocarpa] gb|EEE88833.1| hypothetical protein POPTR_0008s12170g [Populus trichocarpa]	-	-	-
Ai02g4129	p3	(TAA)7	21	813	833	Uncharacterized protein TCM_029168 [Theobroma cacao]	"cytoplasm"	"RNA degradation"	-
Ai02g4175	p3	(ATC)5	15	1146	1160	predicted protein [Populus trichocarpa]	"DNA binding"	-	-
Ai02g4189	p3	(GAA)7	21	2394	2414	CCAAT/enhancer-binding protein zeta isoform 3, partial [Theobroma cacao]	"DNA binding"	-	-
Ai02g4228	p3	(AGC)7	21	1030	1050	PREDICTED: uncharacterized protein LOC100265017 [Vitis vinifera]	"molybdopterin cofactor metabolic process"	-	-
Ai02g4246	p3	(GAT)5	15	43	57	Ubiquitin-protein ligase, putative [Theobroma cacao]	-	-	-
Ai02g4291	p3	(CAG)6	18	60	77	predicted protein [Populus trichocarpa]	"plasma membrane"	-	-
Ai02g4337	p3	(GAT)5	15	553	567	Pre-rRNA-processing protein TSR2, putative [Ricinus communis] gb|EEF49714.1| Pre-rRNA-processing protein TSR2, putative [Ricinus communis]	-	-	-
Ai02g4339	p3	(GCT)6	18	370	387	-	-	-	-
Ai02g4350	p3	(ATG)5	15	170	184	PREDICTED: serine/threonine-protein phosphatase 2A 65 kDa regulatory subunit A beta isoform-like [Cucumis sativus] ref|XP_004159301.1| PREDICTED: serine/threonine-protein phosphatase 2A 65 kDa regulatory subunit A beta isoform-like [Cucumis sativus]	"stamen development"	"Wnt signaling pathway"	-
Ai02g4355	p6	(GATGAA)5	30	313	342	PAM68, chloroplastic, putative isoform 3 [Theobroma cacao] gb|EOY25309.1| PAM68, chloroplastic, putative isoform 3 [Theobroma cacao]	"biological_process"	-	-
Ai02g4435	p3	(CCT)5	15	5251	5265	PREDICTED: uncharacterized protein LOC101304668, partial [Fragaria vesca subsp. vesca]	"ATP-dependent DNA helicase activity"	-	"DNAhelicase."
Ai02g4490	p3	(CAA)7	21	570	590	-	-	-	-
Ai02g4514	p3	(CTT)6	18	5	22	unnamed protein product [Vitis vinifera]	"cytoplasm"	-	"Non-specificserine/threonineproteinkinase."
Ai02g4528	p2	(AG)6	12	1456	1467	PREDICTED: zinc finger CCCH domain-containing protein 18 [Vitis vinifera]	"DNA binding"	-	-
Ai02g4543	p3	(GAT)6	18	828	845	PREDICTED: uncharacterized protein LOC100249911 [Vitis vinifera] emb|CBI32853.3| unnamed protein product [Vitis vinifera]	-	-	-
Ai02g4582	p3	(CTT)6	18	5	22	TMV resistance protein N, putative [Ricinus communis] gb|EEF38940.1| TMV resistance protein N, putative [Ricinus communis]	"cytoplasm"	-	-
Ai02g4583	p3	(GGT)5	15	742	756	PREDICTED: dof zinc finger protein DOF5.4-like [Vitis vinifera]	"DNA binding"	-	-
Ai02g4603	p3	(CTT)5	15	3365	3379	LRR and NB-ARC domains-containing disease resistance protein, putative [Theobroma cacao]	"ADP binding"	"Plant-pathogen interaction"	-
Ai02g4621	p3	(TGC)5	15	1311	1325	PREDICTED: putative ribonuclease H protein At1g65750-like [Fragaria vesca subsp. vesca]	-	-	-
Ai02g4669	c	(GAA)8(GAG)8	48	1171	1218	hypothetical protein PRUPE_ppa003409mg [Prunus persica]	"DNA binding"	-	-
Ai02g4688	p3	(TCT)5	15	54	68	Uncharacterized protein TCM_028581 [Theobroma cacao]	-	-	-
Ai02g4693	p3	(TGA)5	15	978	992	Nfrkb, putative isoform 1 [Theobroma cacao] gb|EOY34219.1| Nfrkb, putative isoform 1 [Theobroma cacao] gb|EOY34220.1| Nfrkb, putative isoform 1 [Theobroma cacao] gb|EOY34221.1| Nfrkb, putative isoform 1 [Theobroma cacao]	"DNA binding"	-	-
Ai02g4693	p3	(GAT)7	21	1705	1725	Nfrkb, putative isoform 1 [Theobroma cacao] gb|EOY34219.1| Nfrkb, putative isoform 1 [Theobroma cacao] gb|EOY34220.1| Nfrkb, putative isoform 1 [Theobroma cacao] gb|EOY34221.1| Nfrkb, putative isoform 1 [Theobroma cacao]	"DNA binding"	-	-
Ai02g4709	p3	(TCC)10	30	99	128	-	-	-	-
Ai02g4715	p3	(TAC)6	18	276	293	hypothetical protein VITISV_013619 [Vitis vinifera]	-	-	-
Ai02g4749	p3	(AAT)13	39	1201	1239	Flavin monooxygenase-like protein floozy [Theobroma cacao]	"monooxygenase activity"	"Methane metabolism"	"Flavin-containingmonooxygenase."
Ai02g4767	p3	(GCT)6	18	415	432	Alba DNA/RNA-binding protein [Theobroma cacao]	"biological_process"	-	-
Ai02g4772	p3	(TCT)5	15	4	18	PREDICTED: allene oxide synthase, chloroplastic [Vitis vinifera]	"monooxygenase activity"	"alpha-Linolenic acid metabolism"	"Hydroperoxidedehydratase."
Ai02g4812	p3	(GCT)6	18	922	939	hypothetical protein POPTR_0005s02820g [Populus trichocarpa]	"transferase activity	"Phenylpropanoid biosynthesis"	"AnthranilateN-benzoyltransferase."
Ai02g4820	p3	(TCT)5	15	46	60	hypothetical protein POPTR_0015s14020g [Populus trichocarpa]	"glycolysis"	"Starch and sucrose metabolism"	"Phosphoglucomutase."
Ai02g4849	p3	(CCT)6	18	115	132	RING/U-box superfamily protein, putative [Theobroma cacao]	"protein ubiquitination"	-	-
Ai02g4853	p3	(AAG)8	24	2149	2172	PREDICTED: general transcription factor 3C polypeptide 3-like [Cicer arietinum]	"tRNA transcription from RNA polymerase III promoter"	-	-
Ai02g4880	p3	(TGA)5	15	282	296	conserved hypothetical protein [Ricinus communis] gb|EEF29306.1| conserved hypothetical protein [Ricinus communis]	-	-	-
Ai02g4893	p3	(GCT)5	15	379	393	unknown [Populus trichocarpa]	-	-	-
Ai02g4947	p3	(AAT)14	42	600	641	PREDICTED: basic leucine zipper 9-like [Fragaria vesca subsp. vesca]	"cellular response to glucose stimulus"	-	-
Ai02g5003	p1	(T)10	10	651	660	-	-	-	-
Ai02g5024	p3	(CTA)8	24	926	949	VQ motif-containing protein [Theobroma cacao]	-	-	-
Ai02g5083	p3	(CCT)5	15	703	717	PREDICTED: probable leucine-rich repeat receptor-like protein kinase At1g68400-like [Vitis vinifera]	"protein kinase activity"	"Plant-pathogen interaction"	"Non-specificserine/threonineproteinkinase."
Ai02g5090	p3	(TGA)6	18	732	749	Ovate family protein 13 [Theobroma cacao]	-	-	-
Ai02g5128	p2	(CT)6	12	99	110	PREDICTED: probable ethanolamine kinase A [Vitis vinifera]	"phosphatidylethanolamine biosynthetic process"	"Glycerophospholipid metabolism"	"Ethanolaminekinase."
Ai02g5129	p3	(AGA)5	15	167	181	-	-	-	-
Ai02g5149	p1	(A)10	10	1578	1587	Aceous RNase P 1, putative isoform 1 [Theobroma cacao]	"ribonuclease P activity"	-	-
Ai02g5159	p3	(GCA)8	24	474	497	lactoylglutathione lyase, putative [Ricinus communis] gb|EEF44770.1| lactoylglutathione lyase, putative [Ricinus communis]	-	-	-
Ai02g5174	p3	(GCT)5	15	1499	1513	hypothetical protein VITISV_008862 [Vitis vinifera]	"protein kinase activity"	"Plant hormone signal transduction"	"Non-specificserine/threonineproteinkinase."
Ai02g5211	p3	(AGA)5	15	188	202	-	-	-	-
Ai02g5222	p3	(TGA)6	18	189	206	terpene synthase 1 [Citrus sinensis]	"cytoplasm"	"Monoterpenoid biosynthesis"	"Beta-farnesenesynthase."
Ai02g5244	p6	(TCAGGT)7	42	319	360	GBF's pro-rich region-interacting factor 1 [Theobroma cacao]	"chloroplast relocation"	"Plant hormone signal transduction"	-
Ai02g5245	p3	(CAA)6	18	675	692	PREDICTED: protein E6-like [Vitis vinifera]	"extracellular region"	-	-
Ai02g5253	p3	(CTC)5	15	101	115	-	-	-	-
Ai02g5258	p3	(GCT)6	18	49	66	-	-	-	-
Ai02g5265	p3	(AGC)6	18	1484	1501	Nam protein 1, putative [Theobroma cacao]	"jasmonic acid biosynthetic process"	-	-
Ai02g5277	p2	(AG)6	12	142	153	ENTH/VHS family protein, putative isoform 1 [Theobroma cacao] gb|EOY04942.1| ENTH/VHS family protein, putative isoform 1 [Theobroma cacao] gb|EOY04943.1| ENTH/VHS family protein, putative isoform 1 [Theobroma cacao]	-	-	-
Ai02g5287	p1	(A)10	10	14	23	-	-	-	-
Ai02g5291	p3	(TCC)7	21	309	329	-	-	-	-
Ai02g5304	p3	(GGT)5	15	88	102	PREDICTED: uncharacterized protein LOC100242152 [Vitis vinifera] emb|CBI38790.3| unnamed protein product [Vitis vinifera]	"ATP binding"	-	-
Ai02g5305	p3	(CTG)5	15	749	763	transcription factor, putative [Ricinus communis] gb|EEF43501.1| transcription factor, putative [Ricinus communis]	"regulation of stomatal complex patterning"	-	-
Ai02g5314	p3	(GCT)5	15	991	1005	ankyrin repeat family protein [Citrus unshiu]	"plasma membrane"	-	-
Ai02g5315	p3	(GCT)5	15	19	33	-	-	-	-
Ai02g5334	p3	(AGC)7	21	212	232	ARM repeat superfamily protein [Theobroma cacao]	"protein ubiquitination"	-	-
Ai02g5335	p3	(CTT)6	18	5	22	predicted protein [Populus trichocarpa] gb|EEF02511.1| hypothetical protein POPTR_0010s22340g [Populus trichocarpa]	-	-	-
Ai02g5350	p3	(TTC)5	15	300	314	hypothetical protein PRUPE_ppa024657mg [Prunus persica]	"biological_process"	-	"Xylogalacturonanbeta-1
Ai02g5395	p3	(GGA)5	15	1	15	-	-	-	-
Ai02g5402	p3	(TCT)7	21	4	24	hypothetical protein POPTR_0077s002001g, partial [Populus trichocarpa]	"cytoplasm"	-	-
Ai02g5415	p3	(CCA)6	18	4	21	-	-	-	-
Ai02g5423	p3	(AAT)5	15	4	18	predicted protein [Populus trichocarpa]	"protein kinase activity"	"Wnt signaling pathway"	"Non-specificserine/threonineproteinkinase."
Ai02g5442	p3	(GCA)7	21	45	65	-	-	-	-
Ai02g5455	p3	(GGA)5	15	55	69	-	-	-	-
Ai02g5462	p3	(AAC)5	15	1187	1201	TCP family transcription factor 4, putative [Theobroma cacao]	"DNA binding"	-	-
Ai02g5525	p3	(TTC)5	15	32	46	predicted protein [Populus trichocarpa] gb|EEE99474.1| lipid-binding serum glycoprotein [Populus trichocarpa]	"biological_process"	"Toll-like receptor signaling pathway"	-
Ai02g5532	p3	(GAT)5	15	763	777	Chloroplast, nucleus, chloroplast envelope, putative [Theobroma cacao]	-	-	-
Ai02g5562	p3	(TGA)5	15	3471	3485	Nuclear matrix constituent protein 1-like protein, putative isoform 1 [Theobroma cacao]	"chloroplast"	"Tight junction"	"Non-specificserine/threonineproteinkinase."
Ai02g5607	p3	(CTG)5	15	440	454	Casparian strip membrane protein 3, putative [Theobroma cacao]	"plasma membrane"	-	-
Ai02g5614	p3	(ATA)5	15	191	205	conserved hypothetical protein [Ricinus communis] gb|EEF40355.1| conserved hypothetical protein [Ricinus communis]	-	-	-
Ai02g5665	p3	(GAT)5	15	292	306	Uncharacterized protein TCM_005082 [Theobroma cacao]	-	-	-
Ai02g5669	p3	(TAA)6	18	222	239	-	-	-	-
Ai02g5674	p3	(GCA)5	15	576	590	Uncharacterized protein TCM_027602 [Theobroma cacao]	-	-	-
Ai02g5700	p3	(GAA)15	45	2017	2061	LRR and NB-ARC domains-containing disease resistance protein, putative [Theobroma cacao]	"ADP binding"	"Plant-pathogen interaction"	-
Ai02g5716	p3	(GAA)6	18	109	126	hypothetical protein PRUPE_ppa1027209mg [Prunus persica]	"thermospermine synthase activity"	"beta-Alanine metabolism"	"Thermosperminesynthase."
Ai02g5730	p3	(GAA)9	27	412	438	-	-	-	-
Ai02g5746	p2	(TA)7	14	988	1001	PREDICTED: wall-associated receptor kinase 3-like [Vitis vinifera]	"vegetative to reproductive phase transition of meristem"	-	-
Ai02g5783	p6	(GAGATG)5	30	1961	1990	AAA-type ATPase family protein [Theobroma cacao]	"mitochondrial inner membrane"	"Protein processing in endoplasmic reticulum"	"Microtubule-severingATPase."
Ai02g5856	p3	(CTT)5	15	5	19	hypothetical protein PRUPE_ppa003597mg [Prunus persica]	"regulation of lipid metabolic process"	"Fatty acid biosynthesis"	"Beta-ketoacyl-acyl-carrier-proteinsynthaseI."
Ai02g5859	p3	(AGA)10	30	360	389	GTP-binding protein DLObg1-2 [Dimocarpus longan] gb|AEP40121.1| GTP-binding protein DLObg1-3 [Dimocarpus longan]	"cytoplasm"	-	-
Ai02g5890	p2	(TC)6	12	1180	1191	conserved hypothetical protein [Ricinus communis] gb|EEF41915.1| conserved hypothetical protein [Ricinus communis]	-	-	-
Ai02g5935	p3	(AAG)6	18	1960	1977	Cellulose-synthase-like C12 [Theobroma cacao]	"plasma membrane"	-	"Glucomannan4-beta-mannosyltransferase."
Ai02g5939	p3	(CAT)8	24	1946	1969	Uncharacterized protein TCM_034969 [Theobroma cacao]	-	-	-
Ai02g5974	p3	(AAG)5	15	482	496	hypothetical protein PRUPE_ppa011692mg [Prunus persica]	-	-	-
Ai02g5986	p3	(TCA)6	18	210	227	NAC transcription factor 030 [Jatropha curcas]	-	-	-
Ai02g6025	p3	(GAA)5	15	49	63	PREDICTED: sulfotransferase 16-like [Vitis vinifera]	"cytoplasm"	"Steroid hormone biosynthesis"	"Aminesulfotransferase."
Ai02g6093	p1	(A)10	10	652	661	NB-ARC domain-containing disease resistance protein, putative isoform 1 [Theobroma cacao]	"ADP binding"	"Plant-pathogen interaction"	-
Ai02g6123	p3	(CTC)6	18	479	496	-	-	-	-
Ai02g6159	p3	(CTT)9	27	491	517	Growth-regulating factor 5, putative [Theobroma cacao]	"ATP binding"	-	-
Ai02g6206	p3	(CAG)5	15	1188	1202	hypothetical protein AMTR_s00062p00161920 [Amborella trichopoda]	"poly(A) RNA binding"	"RNA transport"	-
Ai02g6215	p3	(AAC)6	18	187	204	PREDICTED: zinc finger protein ZAT10-like [Vitis vinifera]	"intracellular"	-	-
Ai02g6233	p3	(GGA)9	27	42	68	-	-	-	-
Ai02g6273	p3	(CAG)7	21	143	163	-	-	-	-
Ai02g6297	p6	(GAACCT)5	30	589	618	PREDICTED: sister chromatid cohesion 1 protein 3-like [Vitis vinifera]	"DNA endoreduplication"	"Cell cycle"	-
Ai02g6328	p3	(TCA)7	21	10	30	BON association protein 2, putative [Theobroma cacao]	"salicylic acid biosynthetic process"	-	-
Ai02g6344	p3	(GAA)9	27	1	27	Golgin subfamily A member 4 [Theobroma cacao]	-	-	-
Ai02g6385	p3	(GAG)7	21	171	191	-	-	-	-
Ai02g6397	p3	(CTC)8	24	59	82	hypothetical protein POPTR_0077s002001g, partial [Populus trichocarpa]	"intracellular"	-	-
Ai02g6465	p3	(TGA)5	15	369	383	PREDICTED: eukaryotic translation initiation factor 1A-like [Cucumis sativus] ref|XP_004171800.1| PREDICTED: eukaryotic translation initiation factor 1A-like [Cucumis sativus]	"RNA binding"	"RNA transport"	-
Ai02g6503	p3	(GGT)7	21	62	82	-	-	-	-
Ai02g6535	p3	(TCT)5	15	79	93	zinc finger protein, putative [Ricinus communis] gb|EEF28297.1| zinc finger protein, putative [Ricinus communis]	"intracellular"	-	-
Ai02g6562	p3	(AAT)7	21	1093	1113	Jojoba acyl CoA reductase-related male sterility protein [Theobroma cacao]	"oxidoreductase activity	"Peroxisome"	"Fattyacyl-CoAreductase."
Ai02g6612	p3	(ATC)5	15	15	29	Alpha-mannosidase 1 isoform 1 [Theobroma cacao]	"root development"	"N-Glycan biosynthesis"	"Mannosyl-oligosaccharide1
Ai02g6620	p3	(CGC)5	15	47	61	predicted protein [Populus trichocarpa] gb|EEE91789.1| hypothetical protein POPTR_0006s14650g [Populus trichocarpa]	"protein ubiquitination"	-	-
Ai02g6635	p3	(CTT)5	15	3188	3202	CC-NBS-LRR protein [Quercus suber]	"ADP binding"	"Plant-pathogen interaction"	-
Ai02g6641	p3	(GAT)7	21	121	141	-	-	-	-
Ai02g6642	c	(TGC)9t(GAA)7	49	27	75	cellulose synthase-like protein CslE [Nicotiana tabacum]	"cellulose biosynthetic process"	-	"Cellulosesynthase(UDP-forming)."
Ai02g6668	p3	(AGA)7	21	282	302	Chaperone DnaJ-domain superfamily protein [Theobroma cacao]	"biological_process"	-	-
Ai02g6673	p3	(ACC)7	21	536	556	hypothetical protein PRUPE_ppa010250mg [Prunus persica]	-	-	-
Ai02g6692	p3	(AAC)6	18	421	438	conserved hypothetical protein [Ricinus communis] gb|EEF32221.1| conserved hypothetical protein [Ricinus communis]	-	-	-
Ai02g6697	p3	(CCA)7	21	1465	1485	predicted protein [Populus trichocarpa] gb|EEE84842.1| hypothetical protein POPTR_0001s34970g [Populus trichocarpa]	"peptidase activity"	"Parkinsons disease"	"HtrA2peptidase."
Ai02g6708	p3	(GCT)5	15	331	345	PREDICTED: pre-mRNA-splicing factor CWC21-like [Glycine max]	-	-	-
Ai02g6720	p3	(AGC)6	18	39	56	S-adenosylmethionine-dependent methyltransferase, putative [Ricinus communis] gb|EEF35407.1| S-adenosylmethionine-dependent methyltransferase, putative [Ricinus communis]	-	-	-
Ai02g6721	p3	(ACC)5	15	97	111	Nucleic acid-binding, OB-fold-like protein isoform 1 [Theobroma cacao]	-	-	-
Ai02g6786	p2	(TC)6	12	1430	1441	Uncharacterized protein isoform 1 [Theobroma cacao]	-	-	-
Ai02g6801	p3	(TCA)5	15	128	142	CONSTANS-like 4 [Theobroma cacao]	"intracellular"	"Circadian rhythm - plant"	-
Ai02g6808	p3	(ACA)11	33	1565	1597	WRKY DNA-binding protein 33 isoform 1 [Theobroma cacao]	"response to heat"	"Plant-pathogen interaction"	-
Ai02g6832	p3	(CCT)7	21	646	666	Integrase-type DNA-binding superfamily protein [Theobroma cacao]	"DNA binding"	-	-
Ai02g6863	p3	(GCA)6	18	27	44	predicted protein [Populus trichocarpa]	-	-	-
Ai02g6863	p1	(A)13	13	213	225	predicted protein [Populus trichocarpa]	-	-	-
Ai02g6864	p3	(GAA)6	18	2125	2142	RING/U-box superfamily protein [Theobroma cacao]	-	-	-
Ai02g6892	p3	(TGA)6	18	57	74	predicted protein [Populus trichocarpa] gb|ABK93661.1| unknown [Populus trichocarpa] gb|EEE81484.1| hypothetical protein POPTR_0002s07680g [Populus trichocarpa]	-	-	-
Ai02g6940	p3	(TTC)8	24	35	58	serine carboxypeptidase, putative [Ricinus communis] gb|EEF42021.1| serine carboxypeptidase, putative [Ricinus communis]	"peptidase activity"	"Phenylpropanoid biosynthesis"	"CarboxypeptidaseD."
Ai02g6943	p3	(GAA)5	15	1999	2013	PREDICTED: DNA (cytosine-5)-methyltransferase 1B-like [Vitis vinifera]	"DNA binding"	"Cysteine and methionine metabolism"	"DNA(cytosine-5-)-methyltransferase."
Ai02g6982	p3	(GTG)7	21	59	79	Potassium transporter family protein isoform 1 [Theobroma cacao]	"response to external stimulus"	-	-
Ai02g6991	p6	(ACAGCA)5	30	170	199	Integrase-type DNA-binding superfamily protein [Theobroma cacao]	"DNA binding"	-	-
Ai02g7012	p3	(AAC)7	21	64	84	NAC domain containing protein 35 [Theobroma cacao]	"DNA binding"	-	-
Ai02g7019	p3	(CTT)9	27	65	91	PREDICTED: probable protein phosphatase 2C 14 [Vitis vinifera]	"catalytic activity"	"Plant hormone signal transduction"	"Phosphoproteinphosphatase."
Ai02g7034	p3	(TCT)6	18	112	129	PREDICTED: auxin-responsive protein IAA31-like [Fragaria vesca subsp. vesca]	"protein dimerization activity"	"Plant hormone signal transduction"	-
Ai02g7051	p3	(CAT)7	21	122	142	conserved hypothetical protein [Ricinus communis] gb|EEF45569.1| conserved hypothetical protein [Ricinus communis]	-	-	-
Ai02g7056	p3	(GGT)5	15	1735	1749	arginine decarboxylase [Citrus trifoliata]	"catalytic activity"	"Arginine and proline metabolism"	"Argininedecarboxylase."
Ai02g7057	p3	(AAG)5	15	608	622	yellow stripe-like transporter 3.2, partial [Arachis hypogaea]	-	-	-
Ai02g7074	p3	(TCC)5	15	2296	2310	Uncharacterized protein isoform 1 [Theobroma cacao]	-	-	-
Ai02g7083	p2	(CT)9	18	836	853	cop9 signalosome complex subunit, putative [Ricinus communis] gb|EEF50468.1| cop9 signalosome complex subunit, putative [Ricinus communis]	"cytoplasm"	"Proteasome"	-
Ai02g7110	p3	(AGA)9	27	1931	1957	Peroxidase 31, putative isoform 1 [Theobroma cacao]	"transcription factor import into nucleus"	-	-
Ai02g7164	p3	(ATG)5	15	518	532	Uncharacterized protein TCM_006967 [Theobroma cacao]	"DNA binding"	-	-
Ai02g7171	p3	(TCT)6	18	163	180	-	-	-	-
Ai02g7207	p3	(TGA)7	21	687	707	-	-	-	-
Ai02g7216	p3	(GAA)7	21	588	608	hypothetical protein POPTR_0007s13400g [Populus trichocarpa]	"cytoplasm"	-	-
Ai02g7222	p3	(GAA)5	15	57	71	CW14 protein isoform 1 [Theobroma cacao]	-	-	-
Ai02g7260	c	(GAT)5tttataacaaatgaggtgaagaggaggttaaaagaactgagaaggaacagttttatggtattgattcctgaagaagagtcgtgtgctgaagaggaggaa(GAG)5	129	172	300	Gb:AAF36750.1, putative isoform 1 [Theobroma cacao]	-	-	-
Ai02g7332	p3	(AGC)5	15	265	279	-	-	-	-
Ai02g7354	p3	(TAC)5	15	1584	1598	PREDICTED: putative UPF0481 protein At3g02645-like [Solanum lycopersicum]	-	-	-
Ai02g7388	p3	(TCA)7	21	571	591	AP2 11, putative [Theobroma cacao]	"DNA binding"	-	-
Ai02g7403	p3	(AAC)5	15	49	63	MYB transcription factor [Populus trichocarpa]	"response to salicylic acid stimulus"	-	-
Ai02g7438	p3	(CAG)6	18	96	113	AF4/FMR2 family member 1 [Theobroma cacao]	-	-	-
Ai02g7438	p3	(CTT)6	18	440	457	AF4/FMR2 family member 1 [Theobroma cacao]	-	-	-
Ai02g7453	p3	(AAG)6	18	1076	1093	Uncharacterized protein TCM_044690 [Theobroma cacao]	"cytoplasm"	-	-
Ai02g7472	p3	(ACT)5	15	526	540	Ovate family protein 14, putative [Theobroma cacao]	-	-	-
Ai02g7484	p3	(AAG)7	21	199	219	BTB/POZ domain-containing protein TNFAIP1 isoform 1 [Theobroma cacao]	-	-	-
Ai02g7495	p3	(CTC)6	18	403	420	-	-	-	-
Ai02g7500	c	(CTC)6tggcaaacagtcccctggcgccttattcctcgcaccctaa(ACC)7	79	50	128	unnamed protein product [Vitis vinifera]	"lipid transport"	-	-
Ai02g7500	c	(TCC)7tcgtcttcctccttcgtcaaactgc(CCT)6tcttcgtcaaactgc(CCT)6	97	452	548	unnamed protein product [Vitis vinifera]	"lipid transport"	-	-
Ai02g7501	p3	(ACC)7	21	141	161	predicted protein [Populus trichocarpa]	"lipid transport"	-	-
Ai02g7515	p3	(ATC)10	30	48	77	PREDICTED: F-box/LRR-repeat protein At3g48880-like [Glycine max]	-	-	-
Ai02g7527	p3	(ATG)5	15	92	106	Transcription factor-like protein [Theobroma cacao]	"lateral root development"	-	-
Ai02g7547	p3	(GGA)11	33	70	102	DNA binding protein, putative [Theobroma cacao]	"DNA binding"	-	-
Ai02g7547	p3	(CAG)5	15	317	331	DNA binding protein, putative [Theobroma cacao]	"DNA binding"	-	-
Ai02g7559	p3	(AAC)5	15	127	141	WRKY transcription factor B [Dimocarpus longan]	"lateral root development"	"Plant-pathogen interaction"	-
Ai02g7564	p3	(TCT)5	15	172	186	Ribosomal protein S21 family protein isoform 1 [Theobroma cacao] gb|EOY02779.1| Ribosomal protein S21 family protein isoform 1 [Theobroma cacao]	-	-	-
Ai02g7584	p3	(CTT)5	15	143	157	Myb-like transcription factor family protein, putative [Theobroma cacao]	"cytoplasm"	-	-
Ai02g7592	p3	(TTC)6	18	15	32	Uncharacterized protein TCM_027325 [Theobroma cacao]	-	-	-
Ai02g7595	p3	(GCA)7	21	798	818	CTV.22 [Citrus trifoliata]	"mediator complex"	-	-
Ai02g7595	p3	(CAG)5	15	1078	1092	CTV.22 [Citrus trifoliata]	"mediator complex"	-	-
Ai02g7595	p3	(GCA)8	24	1230	1253	CTV.22 [Citrus trifoliata]	"mediator complex"	-	-
Ai02g7596	p3	(GCA)9	27	345	371	CTV.22 [Citrus trifoliata]	"mediator complex"	-	-
Ai02g7596	c	(GCA)6a(CAG)7	40	855	894	CTV.22 [Citrus trifoliata]	"mediator complex"	-	-
Ai02g7633	c	(CAA)7aatcaacaaaacccacaacagtctcagcagcagcaacaacagcaacaa(CAG)5	84	1	84	unnamed protein product [Vitis vinifera]	-	-	-
Ai02g7646	p3	(TTC)6	18	23	40	unnamed protein product [Vitis vinifera]	"protein kinase activity"	-	"Non-specificserine/threonineproteinkinase."
Ai02g7650	p3	(AGA)6	18	81	98	Basic helix-loop-helix DNA-binding superfamily protein isoform 5 [Theobroma cacao]	"DNA binding"	-	-
Ai02g7740	p3	(CCT)5	15	553	567	predicted protein [Populus trichocarpa]	"cytoplasm"	"Dorso-ventral axis formation"	-
Ai02g7740	p3	(CCA)5	15	790	804	predicted protein [Populus trichocarpa]	"cytoplasm"	"Dorso-ventral axis formation"	-
Ai02g7761	c	(CAG)8(CAA)7	45	298	342	hypothetical protein PRUPE_ppa009918mg [Prunus persica]	-	-	-
Ai02g7796	p3	(GAA)5	15	1174	1188	GRAS family transcription factor [Populus trichocarpa]	"cytoplasm"	"Plant hormone signal transduction"	-
Ai02g7800	p2	(AG)6	12	1184	1195	hypothetical protein PRUPE_ppa006217mg [Prunus persica]	"regulation of defense response"	"Antigen processing and presentation"	-
Ai02g7802	p3	(TGG)5	15	2	16	GDSL-like Lipase/Acylhydrolase superfamily protein isoform 1 [Theobroma cacao]	"lipid catabolic process"	-	"Alpha-L-fucosidase."
Ai02g7806	p3	(TCT)8	24	10	33	PREDICTED: TMV resistance protein N-like [Vitis vinifera]	"intracellular"	-	-
Ai02g7811	p2	(CT)6	12	113	124	Transcription factor MYB811 [Theobroma cacao]	-	-	-
Ai02g7839	p3	(CAC)5	15	1000	1014	Zinc finger family protein, putative isoform 3 [Theobroma cacao]	-	-	-
Ai02g7864	p3	(AAG)6	18	472	489	PREDICTED: uncharacterized protein LOC100252094 [Vitis vinifera] emb|CBI36821.3| unnamed protein product [Vitis vinifera]	-	-	-
Ai02g7871	p3	(CCT)6	18	115	132	RING/U-box superfamily protein, putative [Theobroma cacao]	"protein ubiquitination"	-	-
Ai02g7918	c	(AAG)6a(AAT)5	34	690	723	PREDICTED: cytochrome P450 724B1 [Vitis vinifera] emb|CBI28487.3| unnamed protein product [Vitis vinifera]	"ferric iron binding"	"Carotenoid biosynthesis"	"Abietadienolhydroxylase."
Ai02g7926	p3	(GAG)8	24	14	37	hypothetical protein VITISV_022015 [Vitis vinifera]	"cytoplasm"	"Wnt signaling pathway"	-
Ai02g7930	p3	(AAT)9	27	907	933	PREDICTED: metacaspase-1-like [Cucumis sativus]	"peptidase activity"	-	-
Ai02g7960	p3	(GGA)5	15	27	41	predicted protein [Populus trichocarpa]	-	-	-
Ai02g7977	p3	(GAG)5	15	62	76	Tetratricopeptide repeat-like superfamily protein [Theobroma cacao]	-	-	-
Ai02g7986	p3	(TGA)10	30	795	824	hypothetical protein PRUPE_ppa004513mg [Prunus persica]	-	-	-
Ai02g7998	p3	(GCA)6	18	1229	1246	XB3 in, putative [Theobroma cacao]	"protein autoubiquitination"	"Neurotrophin signaling pathway"	"Non-specificserine/threonineproteinkinase."
Ai02g8000	p3	(AAG)7	21	1633	1653	PREDICTED: H/ACA ribonucleoprotein complex subunit 4 [Vitis vinifera]	"cytoplasm"	"Ribosome biogenesis in eukaryotes"	"tRNApseudouridine(55)synthase."
Ai02g8000	p3	(AGA)6	18	1757	1774	PREDICTED: H/ACA ribonucleoprotein complex subunit 4 [Vitis vinifera]	"cytoplasm"	"Ribosome biogenesis in eukaryotes"	"tRNApseudouridine(55)synthase."
Ai02g8005	p3	(CAG)5	15	364	378	PREDICTED: glycine-rich RNA-binding protein 2 [Vitis vinifera] emb|CBI32608.3| unnamed protein product [Vitis vinifera]	"RNA binding"	-	-
Ai02g8053	p3	(TCT)8	24	13	36	Peroxidase 19 precursor, putative [Ricinus communis] gb|EEF39823.1| Peroxidase 19 precursor, putative [Ricinus communis]	"hydrogen peroxide catabolic process"	"Methane metabolism"	"Peroxidase."
Ai02g8083	p3	(TCA)8	24	13	36	predicted protein [Populus trichocarpa] gb|EEE97609.1| hypothetical protein POPTR_0011s14080g [Populus trichocarpa]	-	-	-
Ai02g8133	c	(CAA)5(CAG)8	39	462	500	Myb domain protein 13, putative [Theobroma cacao]	"DNA binding"	-	-
Ai02g8153	p3	(GCA)5	15	3631	3645	Time for coffee, putative isoform 1 [Theobroma cacao]	"nucleus"	-	-
Ai02g8158	p3	(GAA)6	18	727	744	Pyridoxal phosphate phosphatase-related protein [Theobroma cacao]	"metabolic process"	"Vitamin B6 metabolism"	"Inorganicdiphosphatase."
Ai02g8185	p3	(CTG)7	21	467	487	Cytochrome C oxidase polypeptide vib, putative [Theobroma cacao]	"cytochrome-c oxidase activity"	"Alzheimers disease"	-
Ai02g8239	p3	(GCT)5	15	196	210	-	-	-	-
Ai02g8251	p3	(CTC)5	15	69	83	Glycosyl hydrolases family 31 protein isoform 1 [Theobroma cacao] gb|EOY25525.1| Glycosyl hydrolases family 31 protein isoform 1 [Theobroma cacao]	"metabolic process"	"Galactose metabolism"	"Alpha-glucosidase."
Ai02g8258	p3	(ATG)5	15	263	277	-	-	-	-
Ai02g8267	p3	(CAT)6	18	178	195	PREDICTED: trihelix transcription factor GT-3a [Vitis vinifera]	"DNA binding"	-	-
Ai02g8274	p3	(GAA)5	15	3163	3177	tir-nbs-lrr resistance protein [Populus trichocarpa]	"cytoplasm"	-	-
Ai02g8278	p3	(AGA)5	15	354	368	hypothetical protein PRUPE_ppa008379mg [Prunus persica]	-	-	-
Ai02g8314	p3	(GAG)5	15	1720	1734	Major facilitator superfamily protein [Theobroma cacao]	"transport"	"Protein digestion and absorption"	-
Ai02g8329	p3	(GAT)5	15	79	93	Ethylene-responsive element binding factor 13, putative [Theobroma cacao]	"jasmonic acid mediated signaling pathway"	"Plant hormone signal transduction"	-
Ai02g8336	p3	(TTC)5	15	159	173	PREDICTED: nifU-like protein 4, mitochondrial-like [Vitis vinifera]	"cytoplasm"	-	-
Ai02g8337	p3	(CAT)5	15	2299	2313	Major facilitator superfamily protein isoform 1 [Theobroma cacao]	"lipid catabolic process"	-	"Acetylajmalineesterase."
Ai02g8350	p3	(GCT)5	15	275	289	conserved hypothetical protein [Ricinus communis] sp|B9SCX0.1|CASP1_RICCO RecName: Full=Casparian strip membrane protein RCOM_1282030 gb|EEF38565.1| conserved hypothetical protein [Ricinus communis]	"plasma membrane"	-	-
Ai02g8357	p3	(AGG)5	15	134	148	DNA-binding bromodomain-containing protein, putative [Theobroma cacao]	-	-	-
Ai02g8359	p3	(AAC)6	18	136	153	-	-	-	-
Ai02g8399	p3	(CTT)6	18	42	59	Eukaryotic aspartyl protease family protein, putative [Theobroma cacao]	"peptidase activity"	-	"Nepenthesin."
Ai02g8402	p3	(GCT)9	27	1360	1386	hypothetical protein PRUPE_ppa006323mg [Prunus persica]	"cytoplasm"	"Proteasome"	"Microtubule-severingATPase."
Ai02g8410	p6	(TCATAG)5	30	237	266	Uncharacterized protein TCM_016010 [Theobroma cacao]	-	-	-
Ai02g8426	p3	(TCT)6	18	16	33	predicted protein [Populus trichocarpa] gb|EEF01713.1| hypothetical protein POPTR_0010s02840g [Populus trichocarpa]	-	-	-
Ai02g8433	p1	(A)10	10	3651	3660	Enhancer of polycomb-like transcription factor protein, putative isoform 1 [Theobroma cacao] gb|EOY31347.1| Enhancer of polycomb-like transcription factor protein, putative isoform 1 [Theobroma cacao]	-	-	-
Ai02g8457	p2	(AG)6	12	581	592	PREDICTED: uncharacterized protein LOC101292729 [Fragaria vesca subsp. vesca]	-	-	-
Ai02g8468	p3	(CAT)7	21	22	42	Plant protein 1589 of Uncharacterized protein function [Theobroma cacao]	-	-	-
Ai02g8493	p3	(AAG)5	15	538	552	Uncharacterized protein TCM_034217 [Theobroma cacao]	"biological_process"	-	-
Ai02g8499	p3	(GAA)11	33	730	762	PREDICTED: zinc finger protein CONSTANS-LIKE 16 [Vitis vinifera] emb|CBI27020.3| unnamed protein product [Vitis vinifera]	"intracellular"	-	-
Ai02g8510	p3	(TCA)5	15	19	33	14 kDa proline-rich protein DC2.15 precursor, putative [Ricinus communis] gb|EEF29088.1| 14 kDa proline-rich protein DC2.15 precursor, putative [Ricinus communis]	-	-	-
Ai02g8541	p3	(CAC)8	24	362	385	PREDICTED: uncharacterized protein LOC101298596 [Fragaria vesca subsp. vesca]	-	-	-
Ai02g8550	p3	(AGC)6	18	806	823	unnamed protein product [Vitis vinifera]	"flower development"	-	-
Ai02g8552	p3	(CCA)5	15	658	672	Winged-helix DNA-binding transcription factor family protein, putative [Theobroma cacao]	"RNA binding"	-	-
Ai02g8562	c	(GAC)7gat(GAG)7	45	238	282	-	-	-	-
Ai02g8571	p3	(AAC)5	15	1495	1509	PREDICTED: ankyrin repeat-containing protein At3g12360-like [Fragaria vesca subsp. vesca]	-	-	-
Ai02g8636	p3	(AGA)5	15	36	50	AIG2-like (avirulence induced gene) family protein [Theobroma cacao]	"response to karrikin"	-	-
Ai02g8655	p3	(TCA)7	21	127	147	Mediator of RNA polymerase II transcription subunit 18, putative [Theobroma cacao]	-	-	-
Ai02g8676	p3	(ATG)8	24	419	442	Actin cytoskeleton-regulatory complex protein end3, putative isoform 1 [Theobroma cacao] gb|EOY12323.1| Actin cytoskeleton-regulatory complex protein end3, putative isoform 1 [Theobroma cacao] gb|EOY12324.1| Actin cytoskeleton-regulatory complex protein end3, putative isoform 1 [Theobroma cacao] gb|EOY12325.1| Actin cytoskeleton-regulatory complex protein end3, putative isoform 1 [Theobroma cacao…	-	-	-
Ai02g8684	p3	(CAC)5	15	511	525	Uncharacterized protein isoform 1 [Theobroma cacao]	-	-	-
Ai02g8685	p3	(AAT)5	15	439	453	Ca2+-binding protein [Citrus sinensis]	"calcium ion binding"	"Plant-pathogen interaction"	-
Ai02g8705	p3	(TCC)7	21	20	40	hypothetical protein POPTR_0011s07050g [Populus trichocarpa]	"protein kinase activity"	"Plant-pathogen interaction"	"Non-specificserine/threonineproteinkinase."
Ai02g8759	p3	(ATG)6	18	1673	1690	Actin-related protein 5 [Theobroma cacao]	"cytoplasm"	"Regulation of actin cytoskeleton"	-
Ai02g8779	p3	(AAG)5	15	601	615	Octicosapeptide/Phox/Bem1p domain-containing protein / tetratricopeptide repeat-containing protein [Theobroma cacao]	"biological_process"	-	-
Ai02g8803	p3	(CGA)8	24	174	197	predicted protein [Populus trichocarpa]	"intracellular"	-	-
Ai02g8808	p3	(GAT)5	15	166	180	RING finger protein 214 isoform 1 [Theobroma cacao]	-	-	-
Ai02g8824	p3	(CTT)6	18	440	457	Homeobox-3, putative [Theobroma cacao]	"cytoplasm"	-	-
Ai02g8834	p3	(GTG)6	18	155	172	Activator of spomin::LUC2, putative [Theobroma cacao]	-	-	-
Ai02g8849	p5	(GCAGG)5	25	2233	2257	Zinc finger family protein [Theobroma cacao]	"amino acid import"	-	-
Ai02g8896	p3	(CAA)7	21	59	79	predicted protein [Populus trichocarpa] gb|EEE94059.1| hypothetical protein POPTR_0005s07170g [Populus trichocarpa]	-	-	-
Ai02g8909	p3	(GAT)8	24	562	585	Receptor like protein 33 [Theobroma cacao]	"stamen development"	"Plant-pathogen interaction"	"Non-specificserine/threonineproteinkinase."
Ai02g8944	p2	(TC)6	12	36	47	predicted protein [Populus trichocarpa] gb|EEF02641.1| NtN2 family protein [Populus trichocarpa]	"peptidase activity"	-	"Ubiquitinylhydrolase1."
Ai02g8958	p3	(CCT)6	18	847	864	hypothetical protein RCOM_0934880 [Ricinus communis] gb|EEF43224.1| hypothetical protein RCOM_0934880 [Ricinus communis]	"molecular_function"	-	-
Ai02g8990	p3	(TGA)5	15	414	428	conserved hypothetical protein [Ricinus communis] gb|EEF28113.1| conserved hypothetical protein [Ricinus communis]	-	-	-
Ai02g8997	p3	(ATC)5	15	14	28	PREDICTED: uncharacterized protein LOC100261047 [Vitis vinifera]	"cytoplasm"	-	-
Ai02g9003	c	(ATG)6acgacgagcaagtgccctgcttctccattttctcatcccaacaacacccccaccaaatg(ACC)7	98	545	642	RecA DNA recombination family protein isoform 1 [Theobroma cacao]	"DNA-dependent ATPase activity"	"Homologous recombination"	-
Ai02g9026	p3	(TTC)7	21	207	227	Eukaryotic aspartyl protease family protein, putative [Theobroma cacao]	-	-	-
Ai02g9028	p3	(GAC)11	33	49	81	hypothetical protein POPTR_0006s00460g [Populus trichocarpa]	"cellular_component"	-	-
Ai02g9035	p3	(GAA)6	18	14065	14082	Midasin, putative [Theobroma cacao]	"nucleoplasm"	"Ribosome biogenesis in eukaryotes"	-
Ai02g9050	p3	(AGA)10	30	153	182	hypothetical protein PRUPE_ppa016310mg, partial [Prunus persica]	-	-	-
Ai02g9060	p3	(CAG)5	15	249	263	-	-	-	-
Ai02g9064	p3	(CAA)5	15	181	195	predicted protein [Populus trichocarpa] gb|ERP63236.1| hypothetical protein POPTR_0003s04510g [Populus trichocarpa]	"biological_process"	-	-
Ai02g9072	p3	(AGC)5	15	20	34	NAC domain transcriptional regulator superfamily protein, putative [Theobroma cacao]	"leaf senescence"	-	-
Ai02g9092	p3	(GAA)6	18	1297	1314	TMV resistance protein N-like protein 6 [Vitis labrusca]	"cytoplasm"	"NOD-like receptor signaling pathway"	"Non-specificserine/threonineproteinkinase."
Ai02g9094	p3	(ACC)5	15	53	67	BR-signaling kinase 1 [Theobroma cacao]	"protein kinase activity"	"Leishmaniasis"	"Non-specificserine/threonineproteinkinase."
Ai02g9098	p3	(GAT)6	18	994	1011	Phosphatidylinositol-4-phosphate 5-kinase family protein, putative isoform 1 [Theobroma cacao]	"phosphatidylinositol phosphorylation"	"Phosphatidylinositol signaling system"	"1-phosphatidylinositol-3-phosphate5-kinase."
Ai02g9155	p3	(GAA)5	15	1356	1370	hypothetical protein POPTR_0011s03600g [Populus trichocarpa]	"ubiquitin protein ligase binding"	"Plant hormone signal transduction"	"Non-specificserine/threonineproteinkinase."
Ai02g9159	c	(ACC)6aaaggtgaacccaagcccacctcctccggttgcaaaaccc(CCA)5	73	183	255	-	-	-	-
Ai02g9204	p3	(TTC)8	24	117	140	predicted protein [Populus trichocarpa] gb|EEF03148.1| hypothetical protein POPTR_0018s12410g [Populus trichocarpa]	-	-	-
Ai02g9234	p3	(AAT)5	15	1456	1470	hypothetical protein POPTR_0003s12140g [Populus trichocarpa]	"transcription factor import into nucleus"	-	-
Ai02g9247	p3	(GAA)5	15	495	509	PREDICTED: mitochondrial import receptor subunit TOM20 [Vitis vinifera] emb|CBI21351.3| unnamed protein product [Vitis vinifera]	"protein transport"	-	-
Ai02g9254	p3	(GCG)7	21	17	37	Ribonuclease II/R family protein, putative [Theobroma cacao]	"cytoplasm"	"RNA degradation"	"ExoribonucleaseII."
Ai02g9261	p3	(GCT)5	15	1186	1200	3,4-dihydroxy-2-butanone kinase, putative [Theobroma cacao]	"ATP binding"	"Methane metabolism"	"FAD-AMPlyase(cyclizing)."
Ai02g9294	p3	(GCA)6	18	36	53	Sulfate transporter 91 [Theobroma cacao]	"transition metal ion transport"	"Pancreatic secretion"	-
Ai02g9297	p3	(TCT)5	15	19	33	Purple acid phosphatase precursor, putative [Ricinus communis] gb|EEF49465.1| Purple acid phosphatase precursor, putative [Ricinus communis]	"cytoplasm"	-	"Acidphosphatase."
Ai02g9308	c	(AGA)6ggaagaggaagag(GAA)8	55	1536	1590	conserved hypothetical protein [Ricinus communis] gb|EEF46446.1| conserved hypothetical protein [Ricinus communis]	"pollen tube development"	-	-
Ai02g9359	p3	(TGA)5	15	246	260	unnamed protein product [Vitis vinifera]	-	-	-
Ai02g9408	p3	(TCT)6	18	2554	2571	ARM repeat superfamily protein isoform 1 [Theobroma cacao]	"protein targeting to vacuole"	-	-
Ai02g9409	p3	(TGA)5	15	480	494	Uncharacterized protein isoform 1 [Theobroma cacao]	-	-	-
Ai02g9409	p3	(CAT)7	21	2395	2415	Uncharacterized protein isoform 1 [Theobroma cacao]	-	-	-
Ai02g9458	p3	(GTG)5	15	29	43	Late embryogenesis abundant (LEA) hydroxyproline-rich glycoprotein family [Theobroma cacao]	-	-	-
Ai02g9461	p3	(TCT)6	18	16	33	PREDICTED: TMV resistance protein N-like [Vitis vinifera]	"callose deposition in cell wall"	-	-
Ai02g9467	p3	(TGT)5	15	44	58	PREDICTED: lignin-forming anionic peroxidase-like [Vitis vinifera]	"hydrogen peroxide catabolic process"	"Methane metabolism"	"Peroxidase."
Ai02g9470	p2	(TC)6	12	5725	5736	DNA polymerase zeta catalytic subunit, putative [Ricinus communis] gb|EEF49839.1| DNA polymerase zeta catalytic subunit, putative [Ricinus communis]	"translesion synthesis"	"Purine metabolism"	"DNA-directedDNApolymerase."
Ai02g9492	c	(CAA)5cagcaacaacaaaaccctttccagagcagctcactcttttcacaacaacaacagcagcag(CAA)7ccacaatttccc(CAA)5cagttgtttccacaacaacagcaacaacaa(CAG)5	168	61	228	Hydroxyproline-rich glycoprotein family protein [Theobroma cacao]	-	-	-
Ai02g9515	p3	(GAG)5	15	318	332	Chromodomain-helicase-DNA-binding protein Mi-2, putative isoform 1 [Theobroma cacao]	-	-	-
Ai02g9605	p3	(TCC)5	15	153	167	hypothetical protein POPTR_0001s27490g [Populus trichocarpa]	"intracellular"	-	-
Ai02g9633	c	(CAA)7(CAG)5(CAA)5	51	73	123	Cryptochrome-interacting basic-helix-loop-helix 1, putative isoform 1 [Theobroma cacao]	"DNA binding"	"Circadian rhythm - plant"	-
Ai02g9633	p3	(AAC)5	15	592	606	Cryptochrome-interacting basic-helix-loop-helix 1, putative isoform 1 [Theobroma cacao]	"DNA binding"	"Circadian rhythm - plant"	-
Ai02g9638	p3	(AAT)5	15	181	195	Mitogen-activated protein kinase kinase kinase 5 isoform 1 [Theobroma cacao]	"cytoplasm"	"MAPK signaling pathway"	"Mitogen-activatedproteinkinasekinasekinase."
Ai02g9638	p6	(CCGTTG)5	30	379	408	Mitogen-activated protein kinase kinase kinase 5 isoform 1 [Theobroma cacao]	"cytoplasm"	"MAPK signaling pathway"	"Mitogen-activatedproteinkinasekinasekinase."
Ai02g9675	p3	(GAT)5	15	1033	1047	Plastid transcriptionally active 3 isoform 2 [Theobroma cacao]	-	-	-
Ai02g9685	p5	(ACCTT)8	40	99	138	-	-	-	-
Ai02g9697	p3	(CTT)8	24	83	106	Duplicated homeodomain-like superfamily protein, putative [Theobroma cacao]	"DNA binding"	-	-
Ai02g9714	p3	(GAA)5	15	463	477	PREDICTED: uncharacterized protein LOC100854493 [Vitis vinifera]	-	-	-
Ai02g9729	p3	(CTT)6	18	143	160	FKBP-like peptidyl-prolyl cis-trans isomerase family protein isoform 1 [Theobroma cacao]	"chloroplast thylakoid"	-	-
Ai02g9756	p3	(TTC)8	24	1120	1143	PREDICTED: cytochrome P450 716B1-like [Fragaria vesca subsp. vesca]	"monooxygenase activity"	"Retinol metabolism"	"Taxadiene5-alpha-hydroxylase."
Ai02g9785	p3	(TCA)5	15	528	542	Homeobox protein 20 [Theobroma cacao]	"DNA binding"	-	-
Ai02g9798	p3	(CAC)5	15	61	75	Avr9/Cf-9 rapidly elicited protein 146, putative [Theobroma cacao]	-	-	-
Ai02g9807	p3	(AAC)12	36	16	51	Basic-leucine zipper transcription factor family protein [Theobroma cacao]	"DNA binding"	-	-
Ai02g9870	p3	(GCT)6	18	90	107	PREDICTED: putative ERD6-like transporter [Vitis vinifera] gb|ADP37156.1| putative ERD6-like transporter [Vitis vinifera]	"substrate-specific transmembrane transporter activity"	-	-
Ai02g9884	p3	(AAG)5	15	1000	1014	myb family transcription factor family protein [Populus trichocarpa]	"cytoplasm"	-	-
Ai02g9900	p3	(CTG)6	18	4349	4366	Multidrug resistance-associated protein 5 isoform 1 [Theobroma cacao]	"stomatal movement"	"ABC transporters"	"Xenobiotic-transportingATPase."
Ai02g9916	p3	(GTG)5	15	203	217	60S acidic ribosomal protein P2B, putative isoform 1 [Theobroma cacao] gb|EOY33501.1| 60S acidic ribosomal protein P2B, putative isoform 1 [Theobroma cacao] gb|EOY33502.1| 60S acidic ribosomal protein P2B, putative isoform 1 [Theobroma cacao]	"structural constituent of ribosome"	"Ribosome"	-
Ai02g9918	p3	(TGA)9	27	99	125	hypothetical protein [Citrus unshiu]	"cytoplasm"	-	-
Ai02g9964	p3	(GCT)5	15	160	174	PREDICTED: uncharacterized protein LOC100249177 [Vitis vinifera] emb|CBI28071.3| unnamed protein product [Vitis vinifera]	-	-	-
Ai02g9982	p2	(AG)6	12	1336	1347	predicted protein [Populus trichocarpa]	"killing of cells of other organism"	-	-
Ai02g9985	p3	(ATG)5	15	161	175	-	-	-	-
Ai02g10038	p3	(CCA)6	18	27	44	Zinc finger family protein isoform 1 [Theobroma cacao]	"protein import into nucleus"	"Ubiquitin mediated proteolysis"	"tRNA(uracil-5-)-methyltransferase."
Ai02g10051	p3	(TTC)5	15	855	869	conserved hypothetical protein [Ricinus communis] gb|EEF35600.1| conserved hypothetical protein [Ricinus communis]	"response to brassinosteroid stimulus"	-	-
Ai02g10068	p3	(GAT)5	15	478	492	-	-	-	-
Ai02g10117	p3	(CAA)7	21	117	137	SAUR family protein [Theobroma cacao]	-	-	-
Ai02g10132	p2	(GA)6	12	10	21	PREDICTED: histone-lysine N-methyltransferase ASHH1-like [Glycine max]	"vegetative to reproductive phase transition of meristem"	"Lysine degradation"	"Histone-lysineN-methyltransferase."
Ai02g10135	p3	(TTG)9	27	34	60	Glycosyl hydrolase family protein isoform 2 [Theobroma cacao]	"metabolic process"	"Phenylpropanoid biosynthesis"	"Beta-glucosidase."
Ai02g10138	p3	(AAC)6	18	80	97	predicted protein [Populus trichocarpa]	"protein ubiquitination"	-	-
Ai02g10158	p6	(ATCACC)5	30	54	83	-	-	-	-
Ai02g10174	p3	(AAG)5	15	38	52	GRAS family transcription factor [Theobroma cacao]	"secondary shoot formation"	"Plant hormone signal transduction"	-
Ai02g10176	p3	(TGG)7	21	132	152	transcription cofactor, putative [Ricinus communis] gb|EEF48691.1| transcription cofactor, putative [Ricinus communis]	"vegetative to reproductive phase transition of meristem"	"Wnt signaling pathway"	"Histoneacetyltransferase."
Ai02g10176	p3	(CAA)5	15	1540	1554	transcription cofactor, putative [Ricinus communis] gb|EEF48691.1| transcription cofactor, putative [Ricinus communis]	"vegetative to reproductive phase transition of meristem"	"Wnt signaling pathway"	"Histoneacetyltransferase."
Ai02g10183	p3	(AGC)9	27	1	27	PREDICTED: uncharacterized protein LOC100265246 [Vitis vinifera]	-	-	-
Ai02g10183	p3	(CAG)7	21	135	155	PREDICTED: uncharacterized protein LOC100265246 [Vitis vinifera]	-	-	-
Ai02g10192	p1	(A)10	10	7350	7359	PREDICTED: ABC transporter B family member 19-like [Vitis vinifera]	"stamen development"	"ABC transporters"	"Xenobiotic-transportingATPase."
Ai02g10195	p3	(TGA)6	18	270	287	Chaperone DnaJ-domain containing protein isoform 3 [Theobroma cacao]	-	-	-
Ai02g10249	p3	(AAG)5	15	16	30	catechol o-methyltransferase related [Populus trichocarpa] gb|ABK92890.1| unknown [Populus trichocarpa] gb|EEE98552.1| eugenol O-methyltransferase family protein [Populus trichocarpa]	"O-methyltransferase activity"	"Flavone and flavonol biosynthesis"	"CaffeateO-methyltransferase."
Ai02g10274	p3	(ATC)5	15	753	767	Leucine-rich repeat protein kinase family protein, putative [Theobroma cacao]	"auxin polar transport"	"Plant-pathogen interaction"	"Non-specificserine/threonineproteinkinase."
Ai02g10275	p3	(TGC)5	15	1146	1160	predicted protein [Populus trichocarpa] gb|EEE82984.1| hypothetical protein POPTR_0001s21720g [Populus trichocarpa]	-	-	-
Ai02g10279	c	(AAC)5actgaaattcaacccaagttattgaaaacaaaaacagaattagaaaacagcagcagtagcagcaactgcagcaacatcacaaccg(ATC)5	115	394	508	myb-like transcription factor 1 [Gossypium hirsutum]	"DNA binding"	-	-
Ai02g10306	p3	(AGA)7	21	1340	1360	Regulator of chromosome condensation family protein isoform 2 [Theobroma cacao]	"cytoplasm"	"Ubiquitin mediated proteolysis"	"Non-specificserine/threonineproteinkinase."
Ai02g10314	p3	(GAA)5	15	75	89	hypothetical protein VITISV_037350 [Vitis vinifera]	-	-	-
Ai02g10371	p3	(AGC)6	18	570	587	Adenine nucleotide alpha hydrolases-like superfamily protein, putative [Theobroma cacao]	"protein kinase activity"	-	-
Ai02g10404	p3	(AAG)5	15	799	813	FK506-binding protein, putative isoform 1 [Theobroma cacao]	"nucleosome assembly"	-	"Peptidylprolylisomerase."
Ai02g10491	p2	(AG)6	12	137	148	F-box associated ubiquitination effector family protein, putative [Theobroma cacao]	"biological_process"	-	-
Ai02g10496	p3	(GCA)5	15	3205	3219	PREDICTED: pentatricopeptide repeat-containing protein At3g63370-like [Vitis vinifera]	"biological_process"	-	-
Ai02g10499	p3	(CTT)6	18	89	106	-	-	-	-
Ai02g10506	p3	(ATG)5	15	944	958	Uncharacterized protein isoform 1 [Theobroma cacao]	-	-	-
Ai02g10529	p3	(ATG)6	18	3161	3178	Uncharacterized protein TCM_028445 [Theobroma cacao]	-	-	-
Ai02g10553	p3	(CAG)8	24	1117	1140	Basic-leucine zipper transcription factor family protein isoform 1 [Theobroma cacao] gb|EOX98113.1| Basic-leucine zipper transcription factor family protein isoform 1 [Theobroma cacao]	"biological_process"	-	-
Ai02g10554	p3	(TGG)5	15	1	15	PREDICTED: magnesium transporter MRS2-4-like [Vitis vinifera]	"plasma membrane"	-	-
Ai02g10566	p2	(GA)6	12	484	495	-	-	-	-
Ai02g10569	p3	(CTT)7	21	36	56	Exostosin family protein [Theobroma cacao]	"fucose biosynthetic process"	-	-
Ai02g10572	p3	(CTT)8	24	140	163	PREDICTED: transaldolase-like [Fragaria vesca subsp. vesca]	"cytoplasm"	"Pentose phosphate pathway"	"Transaldolase."
Ai02g10574	p3	(GAA)7	21	118	138	seven in absentia family protein [Populus trichocarpa]	-	-	-
Ai02g10593	p3	(CCT)6	18	547	564	LOB domain-containing protein, putative [Ricinus communis] gb|EEF41546.1| LOB domain-containing protein, putative [Ricinus communis]	"biological_process"	-	-
Ai02g10604	p3	(GGC)5	15	22	36	Kinase superfamily protein isoform 2 [Theobroma cacao] gb|EOY02367.1| Kinase superfamily protein isoform 2 [Theobroma cacao] gb|EOY02368.1| Kinase superfamily protein isoform 2 [Theobroma cacao]	"protein kinase activity"	"MAPK signaling pathway"	"Non-specificserine/threonineproteinkinase."
Ai02g10617	p3	(AAG)5	15	277	291	Chloroplast-targeted copper chaperone, putative [Theobroma cacao]	-	-	-
Ai02g10627	p3	(AGG)5	15	104	118	hypothetical protein ARALYDRAFT_906938 [Arabidopsis lyrata subsp. lyrata] gb|EFH54284.1| hypothetical protein ARALYDRAFT_906938 [Arabidopsis lyrata subsp. lyrata]	"nucleoplasm"	"Spliceosome"	-
Ai02g10657	p3	(CAC)6	18	119	136	unnamed protein product [Vitis vinifera]	-	-	-
Ai02g10677	p3	(CAG)5	15	97	111	-	-	-	-
Ai02g10686	p6	(TTCTGG)5	30	375	404	Decapping 5, putative isoform 2 [Theobroma cacao]	"cytoplasm"	-	-
Ai02g10712	p2	(AG)6	12	1721	1732	Nuclear matrix constituent protein-related, putative isoform 1 [Theobroma cacao]	"chloroplast"	"Tight junction"	-
Ai02g10737	p3	(CAT)5	15	37	51	RING finger protein, putative [Theobroma cacao]	-	-	-
Ai02g10737	p3	(TCT)5	15	595	609	RING finger protein, putative [Theobroma cacao]	-	-	-
Ai02g10738	p3	(GAA)6	18	21	38	PREDICTED: potassium channel AKT2/3-like [Vitis vinifera]	"regulation of stomatal closure"	-	-
Ai02g10809	p3	(TGA)5	15	642	656	Family of Uncharacterized protein function [Theobroma cacao]	"biological_process"	-	-
Ai02g10831	p3	(ATG)6	18	251	268	terpene synthase 1 [Citrus sinensis]	"cytoplasm"	"Diterpenoid biosynthesis"	"Beta-farnesenesynthase."
Ai02g10832	p3	(TGA)7	21	333	353	terpene synthase 1 [Citrus sinensis]	"cytoplasm"	"Monoterpenoid biosynthesis"	"Beta-farnesenesynthase."
Ai02g10840	p3	(ATA)7	21	197	217	predicted protein [Populus trichocarpa] gb|ABK94785.1| unknown [Populus trichocarpa] gb|EEE84923.1| hypothetical protein POPTR_0001s33590g [Populus trichocarpa]	-	-	-
Ai02g10861	p3	(AAG)8	24	298	321	Plant glycogenin-like starch initiation protein 4, putative [Theobroma cacao]	"transferase activity"	-	"Glycogeninglucosyltransferase."
Ai02g10868	p3	(ACA)5	15	146	160	-	-	-	-
Ai02g10927	p3	(TGG)5	15	192	206	kif4, putative [Ricinus communis] gb|EEF46477.1| kif4, putative [Ricinus communis]	"cytoplasm"	-	-
Ai02g11001	p3	(CCT)5	15	880	894	Associated molecule with the SH3 domain of STAM 3 isoform 1 [Theobroma cacao] gb|EOY06663.1| Associated molecule with the SH3 domain of STAM 3 isoform 1 [Theobroma cacao]	"peptidase activity"	"Endocytosis"	-
Ai02g11022	p3	(ATA)6	18	749	766	NAC domain containing protein 73 [Theobroma cacao]	"DNA binding"	-	-
Ai02g11032	p3	(TCA)6	18	232	249	Galacturonic acid kinase isoform 8 [Theobroma cacao]	"phosphotransferase activity	"Galactose metabolism"	"Galacturonokinase."
Ai02g11038	p3	(GAA)6	18	51	68	hypothetical protein VITISV_016492 [Vitis vinifera]	"iron ion binding"	-	"[HistoneH3]-lysine-36demethylase."
Ai02g11047	p6	(CCTCAT)6	36	317	352	-	-	-	-
Ai02g11058	c	(ATG)6(ATC)5	33	242	274	hypothetical protein POPTR_0005s09750g [Populus trichocarpa]	-	-	-
Ai02g11084	p1	(A)10	10	415	424	-	-	-	-
Ai02g11102	p6	(GAGGAA)5	30	1177	1206	unnamed protein product [Vitis vinifera]	"transposition"	-	-
Ai02g11106	p3	(ATA)5	15	362	376	Uncharacterized protein TCM_014522 [Theobroma cacao]	-	-	-
Ai02g11112	p3	(GAA)5	15	72	86	unnamed protein product [Vitis vinifera]	"transferase activity	"Phenylpropanoid biosynthesis"	"10-deacetylbaccatinIII10-O-acetyltransferase."
Ai02g11134	p3	(ATC)5	15	584	598	MADS domain transcription factor [Camellia japonica]	"DNA binding"	-	-
Ai02g11148	p3	(CAG)5	15	444	458	Uncharacterized protein TCM_000746 [Theobroma cacao]	-	-	-
Ai02g11151	p1	(T)10	10	28	37	predicted protein [Populus trichocarpa]	-	-	-
Ai02g11224	p3	(GAT)7	21	45	65	Basic helix-loop-helix DNA-binding superfamily protein [Theobroma cacao]	"DNA binding"	-	-
Ai02g11258	p3	(GGC)5	15	1	15	Indoleacetic acid-induced protein 16 [Theobroma cacao]	"response to cyclopentenone"	"Plant hormone signal transduction"	-
Ai02g11259	p3	(CAG)6	18	19	36	nramp transporter [Populus trichocarpa]	"transport"	"Lysosome"	-
Ai02g11262	p3	(ATC)5	15	359	373	Homeodomain-like superfamily protein, putative isoform 4, partial [Theobroma cacao]	"DNA binding"	-	-
Ai02g11270	p1	(A)11	11	919	929	Pre-mRNA-splicing factor ATP-dependent RNA helicase PRP16 isoform 1 [Theobroma cacao] gb|EOY13967.1| Pre-mRNA-splicing factor ATP-dependent RNA helicase PRP16 isoform 1 [Theobroma cacao]	"nucleoplasm"	"Spliceosome"	"RNAhelicase."
Ai02g11315	p3	(ACC)5	15	27	41	-	-	-	-
Ai02g11329	p3	(TGA)5	15	3393	3407	pentatricopeptide repeat-containing protein, putative [Ricinus communis] gb|EEF41537.1| pentatricopeptide repeat-containing protein, putative [Ricinus communis]	"Group II intron splicing"	-	-
Ai02g11329	p3	(CAG)7	21	4152	4172	pentatricopeptide repeat-containing protein, putative [Ricinus communis] gb|EEF41537.1| pentatricopeptide repeat-containing protein, putative [Ricinus communis]	"Group II intron splicing"	-	-
Ai02g11357	p3	(TCA)5	15	40	54	-	-	-	-
Ai02g11364	p3	(GAA)5	15	967	981	Uncharacterized protein TCM_037363 [Theobroma cacao]	-	-	-
Ai02g11391	p3	(AGG)8	24	1099	1122	predicted protein [Populus trichocarpa]	-	-	-
Ai02g11404	p3	(AAC)8	24	2712	2735	Disease resistance protein RGA2, putative [Ricinus communis] gb|EEF35612.1| Disease resistance protein RGA2, putative [Ricinus communis]	"ADP binding"	"Meiosis - yeast"	"Non-specificserine/threonineproteinkinase."
Ai02g11411	p2	(CT)6	12	450	461	Transducin/WD40 repeat-like superfamily protein [Theobroma cacao]	"attachment of spindle microtubules to kinetochore"	"RNA transport"	-
Ai02g11467	p3	(AGA)11	33	855	887	Uncharacterized protein TCM_034930 [Theobroma cacao]	-	-	-
Ai02g11497	p3	(TTC)7	21	48	68	PREDICTED: thylakoid lumenal protein At1g12250, chloroplastic-like [Setaria italica]	"chloroplast thylakoid"	-	-
Ai02g11547	p2	(AG)7	14	284	297	unnamed protein product [Vitis vinifera]	"DNA binding"	-	-
Ai02g11569	p3	(AGA)5	15	725	739	SWITCH1, putative [Theobroma cacao]	"female meiosis sister chromatid cohesion"	-	-
Ai02g11592	p2	(CT)6	12	1185	1196	DDB1-CUL4 associated factor 1 [Theobroma cacao]	"CUL4 RING ubiquitin ligase complex"	-	-
Ai02g11611	p1	(A)10	10	532	541	Disease resistance protein RGA2, putative [Ricinus communis] gb|EEF35612.1| Disease resistance protein RGA2, putative [Ricinus communis]	"ADP binding"	"Plant-pathogen interaction"	-
Ai02g11611	p3	(TGA)8	24	2670	2693	Disease resistance protein RGA2, putative [Ricinus communis] gb|EEF35612.1| Disease resistance protein RGA2, putative [Ricinus communis]	"ADP binding"	"Plant-pathogen interaction"	-
Ai02g11613	p3	(TCT)5	15	49	63	pentatricopeptide repeat-containing protein, putative [Ricinus communis] gb|EEF30336.1| pentatricopeptide repeat-containing protein, putative [Ricinus communis]	"embryo development ending in seed dormancy"	-	-
Ai02g11625	p3	(CAC)5	15	26	40	-	-	-	-
Ai02g11645	p3	(CTT)5	15	1004	1018	RING/U-box superfamily protein, putative [Theobroma cacao]	"protein ubiquitination"	-	-
Ai02g11649	p6	(GCTCCA)5	30	454	483	-	-	-	-
Ai02g11650	p6	(GTCCTC)5	30	81	110	Glycine-rich protein isoform 1 [Theobroma cacao]	"biological_process"	-	-
Ai02g11658	p3	(GCA)6	18	29	46	-	-	-	-
Ai02g11676	p3	(GAA)5	15	79	93	unnamed protein product [Vitis vinifera]	"cytoplasm"	-	-
Ai02g11699	p3	(GAT)16	48	211	258	hypothetical protein PRUPE_ppa000249mg [Prunus persica]	-	-	-
Ai02g11718	p3	(AAC)5	15	176	190	hypothetical protein POPTR_0003s10000g [Populus trichocarpa] gb|ERP63500.1| hypothetical protein POPTR_0003s10000g [Populus trichocarpa]	-	-	-
Ai02g11740	p3	(GAA)9	27	73	99	PREDICTED: general transcription factor 3C polypeptide 3-like [Vitis vinifera]	"tRNA transcription from RNA polymerase III promoter"	-	-
Ai02g11743	p3	(CAA)7	21	141	161	predicted protein [Populus trichocarpa] gb|ERP54101.1| hypothetical protein POPTR_0013s11830g [Populus trichocarpa]	-	-	-
Ai02g11743	p3	(TTC)6	18	378	395	predicted protein [Populus trichocarpa] gb|ERP54101.1| hypothetical protein POPTR_0013s11830g [Populus trichocarpa]	-	-	-
Ai02g11760	p3	(GAG)5	15	427	441	skp1, putative [Ricinus communis] gb|EEF52763.1| skp1, putative [Ricinus communis]	"DNA endoreduplication"	"Wnt signaling pathway"	-
Ai02g11771	p3	(GCC)5	15	124	138	Plant invertase/pectin methylesterase inhibitor superfamily protein, partial [Theobroma cacao]	"negative regulation of catalytic activity"	-	-
Ai02g11786	p3	(CTT)6	18	32	49	Protease degS, putative isoform 1 [Theobroma cacao]	"peptidase activity"	"Glutathione metabolism"	"Glutathionetransferase."
Ai02g11804	p3	(AAC)6	18	445	462	-	-	-	-
Ai02g11851	p3	(AGC)5	15	242	256	AGAMOUS-like 18, putative [Theobroma cacao]	"flower development"	-	-
Ai02g11851	p3	(GAC)10	30	622	651	AGAMOUS-like 18, putative [Theobroma cacao]	"flower development"	-	-
Ai02g11868	p3	(GCA)7	21	1	21	Type-a response regulator [Theobroma cacao]	"cytokinin mediated signaling pathway"	"Plant hormone signal transduction"	-
Ai02g11887	p3	(GAT)7	21	619	639	RING/U-box protein, putative isoform 2 [Theobroma cacao] gb|EOY11590.1| RING/U-box protein, putative isoform 2 [Theobroma cacao]	-	-	-
Ai02g11910	p3	(ACA)5	15	172	186	unknown [Populus trichocarpa]	-	-	-
Ai02g11910	p3	(TGG)5	15	503	517	unknown [Populus trichocarpa]	-	-	-
Ai02g11943	p3	(AGA)5	15	198	212	PREDICTED: transcription factor WER-like [Vitis vinifera] emb|CBI15023.3| unnamed protein product [Vitis vinifera]	"epidermal cell differentiation"	-	-
Ai02g11960	p3	(TGC)5	15	399	413	Formate dehydrogenase [Theobroma cacao]	"metabolic process"	"Methane metabolism"	"Formatedehydrogenase."
Ai02g11999	p3	(CCA)5	15	200	214	Transducin/WD40 repeat-like superfamily protein [Theobroma cacao]	"nodulation"	-	"[Myosinheavy-chain]kinase."
Ai02g12019	p3	(ACA)5	15	134	148	-	-	-	-
Ai02g12073	p3	(TCA)8	24	102	125	short-chain dehydrogenase, putative [Ricinus communis] gb|EEF51954.1| short-chain dehydrogenase, putative [Ricinus communis]	"protein transport"	"Linoleic acid metabolism"	"NADP-retinoldehydrogenase."
Ai02g12074	p3	(CGA)5	15	21	35	PREDICTED: FKBP12-interacting protein of 37 kDa [Vitis vinifera] emb|CBI14980.3| unnamed protein product [Vitis vinifera]	"nuclear speck"	-	-
Ai02g12081	p3	(TAC)6	18	1494	1511	Non-specific phospholipase C3 [Theobroma cacao]	"disassembly by symbiont of host cellular component"	-	"PhospholipaseC."
Ai02g12082	p3	(CTT)7	21	17	37	Non-specific phospholipase C4 [Theobroma cacao]	"disassembly by symbiont of host cellular component"	-	"PhospholipaseC."
Ai02g12092	p3	(CAG)5	15	64	78	ccaat-binding transcription factor, putative [Ricinus communis] gb|EEF34319.1| ccaat-binding transcription factor, putative [Ricinus communis]	"cytoplasm"	"Antigen processing and presentation"	-
Ai02g12095	p3	(CAG)7	21	91	111	-	-	-	-
Ai02g12120	p3	(CGG)5	15	905	919	PREDICTED: E3 ubiquitin-protein ligase RING1-like [Fragaria vesca subsp. vesca]	"protein ubiquitination"	-	-
Ai02g12124	p3	(ATG)5	15	1415	1429	DNAJ heat shock N-terminal domain-containing protein, putative [Theobroma cacao]	-	-	-
Ai02g12145	p3	(GCT)6	18	4	21	predicted protein [Populus trichocarpa] gb|EEE80635.1| beta-cyanoalanine synthase family protein [Populus trichocarpa]	"glycolysis"	"Glycine	"Cysteinesynthase."
Ai02g12183	p1	(A)10	10	14	23	-	-	-	-
Ai02g12222	p3	(GAA)5	15	15	29	Serine/threonine-protein kinase GCN2 isoform 3, partial [Theobroma cacao]	"protein kinase activity"	-	"Non-specificserine/threonineproteinkinase."
Ai02g12224	p3	(TTC)7	21	423	443	hypothetical protein VITISV_033193 [Vitis vinifera]	"DNA binding"	-	-
Ai02g12227	p3	(CCA)5	15	18	32	Calmodulin-binding protein-related, putative [Theobroma cacao]	"biological_process"	-	-
Ai02g12250	p3	(ACG)5	15	230	244	PREDICTED: DEAD-box ATP-dependent RNA helicase ISE2, chloroplastic-like [Vitis vinifera]	"plasmodesmata-mediated intercellular transport"	"RNA degradation"	"RNAhelicase."
Ai02g12255	p3	(AAT)7	21	3412	3432	Dentin sialophosphoprotein-related, putative isoform 1 [Theobroma cacao] gb|EOY23287.1| Dentin sialophosphoprotein-related, putative isoform 1 [Theobroma cacao]	-	-	-
Ai02g12270	p3	(CAG)5	15	374	388	predicted protein [Populus trichocarpa] sp|B9I534.1|CASP1_POPTR RecName: Full=Casparian strip membrane protein POPTRDRAFT_569472 gb|EEE96589.1| integral membrane family protein [Populus trichocarpa]	"plasma membrane"	-	-
Ai02g12287	p3	(AGA)6	18	365	382	unnamed protein product [Vitis vinifera]	-	-	-
Ai02g12290	p3	(TCC)6	18	148	165	PREDICTED: pentatricopeptide repeat-containing protein At4g33170 [Vitis vinifera]	"mitochondrion"	-	-
Ai02g12310	p3	(TGA)7	21	1575	1595	Major facilitator superfamily protein isoform 1 [Theobroma cacao]	-	-	-
Ai02g12340	p3	(AAC)5	15	103	117	PREDICTED: uncharacterized protein LOC101305729 [Fragaria vesca subsp. vesca]	-	-	-
Ai02g12359	p2	(TC)7	14	909	922	PREDICTED: mitochondrial substrate carrier family protein S [Vitis vinifera] emb|CBI30592.3| unnamed protein product [Vitis vinifera]	"mitochondrial inner membrane"	-	-
Ai02g12367	p3	(GAA)9	27	430	456	predicted protein [Populus trichocarpa]	-	-	-
Ai02g12416	p3	(ACC)6	18	3605	3622	hypothetical protein PRUPE_ppa000815mg [Prunus persica]	"vegetative to reproductive phase transition of meristem"	-	-
Ai02g12432	p3	(AGG)5	15	568	582	PREDICTED: uncharacterized protein LOC100248740 [Vitis vinifera] emb|CBI20265.3| unnamed protein product [Vitis vinifera]	"cell wall modification involved in abscission"	-	-
Ai02g12447	p3	(TCT)6	18	4	21	predicted protein [Populus trichocarpa]	-	-	-
Ai02g12464	p3	(AAG)5	15	186	200	predicted protein [Populus trichocarpa] gb|EEF06252.1| hypothetical protein POPTR_0015s07650g [Populus trichocarpa]	-	-	-
Ai02g12468	p3	(AAC)5	15	34	48	Basic helix-loop-helix DNA-binding superfamily protein isoform 1 [Theobroma cacao] gb|EOX90618.1| Basic helix-loop-helix-containing protein, putative isoform 1 [Theobroma cacao]	"response to chitin"	-	-
Ai02g12477	p3	(GAT)5	15	715	729	protein with unknown function [Ricinus communis] gb|EEF47472.1| protein with unknown function [Ricinus communis]	"regulation of homologous chromosome segregation"	-	-
Ai02g12480	p3	(TGG)7	21	20	40	predicted protein [Populus trichocarpa] gb|ABK94976.1| unknown [Populus trichocarpa] gb|EEE97175.1| hypothetical protein POPTR_0011s01630g [Populus trichocarpa]	"biological_process"	-	-
Ai02g12506	p3	(CAA)6	18	527	544	-	-	-	-
Ai02g12529	p3	(CTT)5	15	131	145	ASH1-related protein 2, putative isoform 1 [Theobroma cacao] gb|EOY06695.1| ASH1-related protein 2, putative isoform 1 [Theobroma cacao]	"chromatin modification"	-	"Histone-lysineN-methyltransferase."
Ai02g12563	p6	(TCCATA)5	30	82	111	Neuronal PAS domain-containing protein 4 [Theobroma cacao]	-	-	-
Ai02g12569	p3	(AAT)10	30	250	279	Endoribonuclease Dicer family protein [Populus trichocarpa]	"production of ta-siRNAs involved in RNA interference"	-	"RNAhelicase."
Ai02g12592	p3	(AGA)6	18	422	439	hypothetical protein VITISV_032916 [Vitis vinifera]	"DNA binding"	-	-
Ai02g12593	p3	(TCT)6	18	144	161	-	-	-	-
Ai02g12601	p3	(GAT)7	21	106	126	-	-	-	-
Ai02g12602	c	(GAC)6ggctgtgacttggcgccggctgcatccatggaaggtgatgga(GAC)7	81	148	228	-	-	-	-
Ai02g12621	p3	(GGA)8	24	691	714	RING/U-box superfamily protein, putative isoform 1 [Theobroma cacao] gb|EOY28828.1| RING/U-box superfamily protein, putative isoform 1 [Theobroma cacao]	-	-	-
Ai02g12726	p3	(GAA)6	18	214	231	PREDICTED: DEAD-box ATP-dependent RNA helicase 41-like isoform 1 [Fragaria vesca subsp. vesca]	"ATP binding"	"Spliceosome"	"RNAhelicase."
Ai02g12730	p3	(AAG)6	18	287	304	Uncharacterized protein TCM_024932 [Theobroma cacao]	-	-	-
Ai02g12764	p6	(CTGCTC)5	30	419	448	PREDICTED: uncharacterized GPI-anchored protein At1g27950 [Vitis vinifera] emb|CBI32156.3| unnamed protein product [Vitis vinifera]	-	-	-
Ai02g12775	p3	(GAT)5	15	280	294	hypothetical protein PRUPE_ppa001306mg [Prunus persica]	"cytoplasm"	-	-
Ai02g12795	p3	(AGA)5	15	806	820	PREDICTED: uncharacterized protein LOC100266970 [Vitis vinifera] emb|CAN61243.1| hypothetical protein VITISV_016134 [Vitis vinifera]	-	-	-
Ai02g12809	p3	(AGA)5	15	42	56	Domain of Uncharacterized protein function, putative [Theobroma cacao]	"DNA replication"	-	-
Ai02g12811	p3	(GAA)5	15	66	80	Kinase superfamily protein [Theobroma cacao]	"protein kinase activity"	"Plant hormone signal transduction"	"Non-specificserine/threonineproteinkinase."
Ai02g12822	c	(CAT)9(CAA)6	45	1497	1541	Concanavalin A-like lectin protein kinase family protein [Theobroma cacao]	"protein kinase activity"	"Plant hormone signal transduction"	"Non-specificserine/threonineproteinkinase."
Ai02g12835	p3	(CGA)7	21	21	41	hypothetical protein PRUPE_ppa007798mg [Prunus persica]	-	-	-
Ai02g12836	p3	(TTC)5	15	58	72	Receptor-like kinase in flowers 1, putative [Theobroma cacao]	"protein kinase activity"	"Plant hormone signal transduction"	"Non-specificserine/threonineproteinkinase."
Ai02g12885	p3	(ACC)5	15	50	64	DNA gyrase subunit A, chloroplast/mitochondrial precursor, putative [Ricinus communis] gb|EEF36061.1| DNA gyrase subunit A, chloroplast/mitochondrial precursor, putative [Ricinus communis]	"DNA binding"	-	"DNAtopoisomerase(ATP-hydrolyzing)."
Ai02g12887	p3	(TAA)7	21	165	185	AP2/EREBP transcriptional factor WRI1 [Jatropha curcas]	"triglyceride biosynthetic process"	-	-
Ai02g12889	p3	(GAC)5	15	334	348	DNA binding protein, putative [Ricinus communis] gb|EEF50240.1| DNA binding protein, putative [Ricinus communis]	-	-	-
Ai02g12897	p3	(TAA)5	15	249	263	CTC-interacting domain 9 [Theobroma cacao]	-	-	-
Ai02g12899	p3	(CTA)5	15	20	34	putative 9-cis-epoxycarotenoid dioxygenase 3 [Citrus sinensis]	"chloroplast thylakoid membrane"	"Carotenoid biosynthesis"	"9-cis-epoxycarotenoiddioxygenase."
Ai02g12958	p3	(CCA)6	18	2935	2952	Dynamin-like protein 6 isoform 1 [Theobroma cacao]	"clathrin-coated endocytic vesicle"	"Endocytosis"	"DynaminGTPase."
Ai02g12966	p3	(CTT)5	15	437	451	predicted protein [Populus trichocarpa] gb|ERP60065.1| kinase family protein [Populus trichocarpa]	"protein kinase activity"	"Plant hormone signal transduction"	"Non-specificserine/threonineproteinkinase."
Ai02g12973	p3	(GAC)5	15	320	334	PREDICTED: uncharacterized protein LOC100247464 [Vitis vinifera]	-	-	-
Ai02g12977	p3	(AGA)7	21	672	692	Glutaredoxin family protein, putative [Theobroma cacao]	"plasma membrane"	-	-
Ai02g12985	p3	(TCT)6	18	301	318	Uncharacterized protein isoform 1 [Theobroma cacao]	-	-	-
Ai02g13000	p3	(GAA)5	15	42	56	Uncharacterized protein TCM_021769 [Theobroma cacao]	-	-	-
Ai02g13067	p3	(TAA)6	18	60	77	Uncharacterized protein TCM_014639 [Theobroma cacao]	-	-	-
Ai02g13070	p3	(CTC)7	21	44	64	hypothetical protein POPTR_0006s00960g [Populus trichocarpa]	"chloroplast"	-	-
Ai02g13127	p3	(ATC)6	18	2502	2519	Kinase superfamily protein isoform 2 [Theobroma cacao] gb|EOY25871.1| Kinase superfamily protein isoform 2 [Theobroma cacao]	"protein kinase activity"	"Chemokine signaling pathway"	"Non-specificserine/threonineproteinkinase."
Ai02g13154	p1	(A)10	10	2697	2706	Set domain protein, putative isoform 1 [Theobroma cacao] gb|EOY15832.1| Set domain protein, putative isoform 1 [Theobroma cacao] gb|EOY15833.1| Set domain protein, putative isoform 1 [Theobroma cacao]	"nuclear speck"	"Lysine degradation"	"Histone-lysineN-methyltransferase."
Ai02g13158	p3	(AGA)5	15	30	44	hypothetical protein PRUPE_ppa007679mg [Prunus persica]	"biological_process"	-	-
Ai02g13162	p3	(AGG)9	27	1	27	PREDICTED: helicase SWR1-like [Vitis vinifera] emb|CBI27512.3| unnamed protein product [Vitis vinifera]	"regulation of DNA recombination"	-	"DNAhelicase."
Ai02g13197	p2	(AG)6	12	183	194	Vacuolar fusion protein MON1 A isoform 1 [Theobroma cacao] gb|EOY34364.1| Vacuolar fusion protein MON1 A isoform 1 [Theobroma cacao]	"protein transport"	-	-
Ai02g13215	p3	(TGA)8	24	735	758	hypothetical protein RCOM_0607680 [Ricinus communis] gb|EEF40351.1| hypothetical protein RCOM_0607680 [Ricinus communis]	-	-	-
Ai02g13218	p3	(GCA)6	18	31	48	PREDICTED: uncharacterized protein At2g34160-like [Cucumis sativus] ref|XP_004173075.1| PREDICTED: uncharacterized protein At2g34160-like [Cucumis sativus]	"biological_process"	-	-
Ai02g13228	p2	(GA)6	12	745	756	Mov34/MPN/PAD-1 family protein isoform 1 [Theobroma cacao]	"peptidase activity"	-	-
Ai02g13252	p3	(GCA)5	15	44	58	predicted protein [Populus trichocarpa]	"DNA binding"	-	-
Ai02g13274	p6	(AGATGG)6	36	702	737	FtsJ-like methyltransferase family protein [Theobroma cacao]	"rRNA processing"	-	"23SrRNA(uridine(2552)-2{prime}-O-)-methyltransferase."
Ai02g13274	p3	(TGA)5	15	2358	2372	FtsJ-like methyltransferase family protein [Theobroma cacao]	"rRNA processing"	-	"23SrRNA(uridine(2552)-2{prime}-O-)-methyltransferase."
Ai02g13301	p3	(GGC)5	15	82	96	PREDICTED: uncharacterized protein LOC101305076 isoform 2 [Fragaria vesca subsp. vesca]	-	-	-
Ai02g13313	p3	(TCT)5	15	190	204	hypothetical protein VITISV_036369 [Vitis vinifera]	-	-	-
Ai02g13313	c	(GAT)7(GAA)5	36	472	507	hypothetical protein VITISV_036369 [Vitis vinifera]	-	-	-
Ai02g13320	p3	(AGA)7	21	150	170	-	-	-	-
Ai02g13377	p3	(TTC)5	15	42	56	Flavonol 4'-sulfotransferase, putative [Ricinus communis] gb|EEF36445.1| Flavonol 4'-sulfotransferase, putative [Ricinus communis]	-	-	-
Ai02g13398	p3	(TTC)12	36	498	533	hypothetical protein POPTR_0001s12240g [Populus trichocarpa]	"DNA binding"	-	-
Ai02g13406	p3	(GCG)7	21	706	726	Uncharacterized protein TCM_026746 [Theobroma cacao]	-	-	-
Ai02g13409	c	(GGC)6ggtgggaccaatggttcaacgggtgctagctgcaacagctgctggtgtaaatggagatggaaaacc(CAA)5	99	28	126	hypothetical protein POPTR_0008s02900g [Populus trichocarpa]	-	-	-
Ai02g13411	p3	(ATC)11	33	45	77	hypothetical protein PRUPE_ppa000905mg [Prunus persica]	"glucosinolate metabolic process"	-	"Limitdextrinase."
Ai02g13442	c	(ACC)5acg(ACC)5acaagtatcttcgctaagattttgagagctctgggtcaccatccacttctc(TCT)5	99	13	111	Haloacid dehalogenase-like hydrolase (HAD) superfamily protein isoform 1 [Theobroma cacao]	"phosphatase activity"	-	"Phosphoproteinphosphatase."
Ai02g13478	p3	(AGA)5	15	96	110	C2H2 and C2HC zinc fingers superfamily protein [Theobroma cacao]	-	-	-
Ai02g13518	p3	(CAG)5	15	2035	2049	poly A-binding protein 2 [Citrus sinensis]	"protein glycosylation"	"RNA transport"	-
Ai02g13539	p3	(ATC)5	15	639	653	protein binding protein, putative [Ricinus communis] gb|EEF33711.1| protein binding protein, putative [Ricinus communis]	"protein catabolic process"	-	-
Ai02g13566	p3	(AGA)5	15	132	146	unnamed protein product [Vitis vinifera]	"transition metal ion transport"	"Plant-pathogen interaction"	-
Ai02g13571	p3	(AGA)6	18	848	865	predicted protein [Populus trichocarpa]	"protein glycosylation"	"Terpenoid backbone biosynthesis"	"diphosphatespecific)."
Ai02g13603	p3	(TAA)5	15	1104	1118	ATP binding protein, putative isoform 1 [Theobroma cacao]	"production of ta-siRNAs involved in RNA interference"	-	"Non-specificserine/threonineproteinkinase."
Ai02g13612	p3	(CTC)7	21	2735	2755	predicted protein [Populus trichocarpa]	"stamen development"	"Plant hormone signal transduction"	"Non-specificserine/threonineproteinkinase."
Ai02g13658	c	(AGG)8ggaagaagaagtaggagaaggagaagaaggaggaggaagaaggaggaggacgaagaagaggcaaaagaaga(AGG)6	113	51	163	-	-	-	-
Ai02g13675	p3	(ATG)6	18	1	18	hypothetical protein PRUPE_ppa024846mg [Prunus persica]	"potassium ion homeostasis"	-	-
Ai02g13709	p3	(AAC)5	15	799	813	Myb domain protein 20 [Theobroma cacao]	"DNA binding"	-	-
Ai02g13719	c	(TCT)5tccagattatttccaactc(TCT)14	76	16	91	-	-	-	-
Ai02g13722	p6	(AGCAAC)5	30	404	433	Myb domain protein 121 [Theobroma cacao]	"response to salicylic acid stimulus"	-	-
Ai02g13755	p3	(GCA)5	15	873	887	PREDICTED: NAC domain-containing protein 89-like [Fragaria vesca subsp. vesca]	"DNA binding"	-	-
Ai02g13756	p3	(TCT)6	18	33	50	hypothetical protein VITISV_014508 [Vitis vinifera]	"negative regulation of catalytic activity"	-	-
Ai02g13762	p3	(CAG)6	18	239	256	-	-	-	-
Ai02g13767	p3	(GAC)6	18	319	336	PREDICTED: uncharacterized protein LOC100251960 [Vitis vinifera]	"nucleic acid binding"	-	-
Ai02g13854	p3	(GAA)5	15	340	354	hypothetical protein VITISV_016481 [Vitis vinifera]	-	-	-
Ai02g13859	p3	(TCC)5	15	470	484	Myb domain protein 106 [Theobroma cacao]	"response to salicylic acid stimulus"	-	-
Ai02g13876	p3	(TCT)5	15	1432	1446	MAP kinase kinase 6 isoform 1 [Theobroma cacao] gb|EOY30614.1| MAP kinase kinase 6 isoform 1 [Theobroma cacao]	"protein kinase activity"	"Gap junction"	"Mitogen-activatedproteinkinasekinase."
Ai02g13924	p3	(GGT)5	15	30	44	SIN3-like 2, putative isoform 2 [Theobroma cacao]	"negative regulation of transcription	"Lysine degradation"	"Non-specificserine/threonineproteinkinase."
Ai02g13924	p3	(GGA)5	15	171	185	SIN3-like 2, putative isoform 2 [Theobroma cacao]	"negative regulation of transcription	"Lysine degradation"	"Non-specificserine/threonineproteinkinase."
Ai02g13926	p3	(CAC)6	18	161	178	-	-	-	-
Ai02g13929	p3	(AGC)5	15	128	142	Uncharacterized protein isoform 1 [Theobroma cacao]	-	-	-
Ai02g13933	p3	(CTT)5	15	17	31	hypothetical protein ARALYDRAFT_327329 [Arabidopsis lyrata subsp. lyrata] gb|EFH51000.1| hypothetical protein ARALYDRAFT_327329 [Arabidopsis lyrata subsp. lyrata]	"callose deposition in cell wall"	-	-
Ai02g13961	p3	(GAG)5	15	313	327	-	-	-	-
Ai02g13979	p3	(AGA)7	21	335	355	-	-	-	-
Ai02g13980	p2	(GA)6	12	1337	1348	phenylalanine ammonia-lyase [Rhus chinensis]	"cytoplasm"	"Histidine metabolism"	"Phenylalanineammonia-lyase."
Ai02g14021	p3	(AAG)6	18	1374	1391	PREDICTED: peptidyl-prolyl cis-trans isomerase FKBP43-like [Fragaria vesca subsp. vesca]	"protein peptidyl-prolyl isomerization"	-	"Peptidylprolylisomerase."
Ai02g14052	p3	(CAC)5	15	131	145	Pentatricopeptide repeat-containing protein, putative isoform 1 [Theobroma cacao] gb|EOX98414.1| Pentatricopeptide repeat-containing protein, putative isoform 1 [Theobroma cacao] gb|EOX98415.1| Pentatricopeptide repeat-containing protein, putative isoform 1 [Theobroma cacao] gb|EOX98416.1| Pentatricopeptide repeat-containing protein, putative isoform 1 [Theobroma cacao]	"plastid chromosome"	-	-
Ai02g14076	p3	(CTT)6	18	182	199	Abscisic acid responsive element-binding factor 1, putative [Theobroma cacao]	"DNA binding"	"Plant hormone signal transduction"	-
Ai02g14081	p3	(TTC)5	15	32	46	berberine bridge enzyme [Hevea brasiliensis]	"UDP-N-acetylmuramate dehydrogenase activity"	-	"Reticulineoxidase."
Ai02g14144	p3	(AGC)5	15	604	618	Growth-regulating factor 2 [Theobroma cacao]	"ATP binding"	-	-
Ai02g14147	p3	(AGA)5	15	218	232	-	-	-	-
Ai02g14184	p2	(CT)7	14	384	397	hypothetical protein PRUPE_ppa009077mg [Prunus persica]	"DNA binding"	-	-
Ai02g14199	p1	(T)10	10	102	111	-	-	-	-
Ai02g14218	p3	(AGA)6	18	129	146	Cytochrome P450 [Medicago truncatula] gb|AET04408.1| Cytochrome P450 [Medicago truncatula]	"monooxygenase activity"	"Carotenoid biosynthesis"	"Unspecificmonooxygenase."
Ai02g14251	p3	(ATG)5	15	662	676	F-box family protein isoform 1 [Theobroma cacao] gb|EOY30103.1| F-box family protein isoform 1 [Theobroma cacao]	"cellular_component"	-	-
Ai02g14252	p3	(GGA)7	21	295	315	-	-	-	-
Ai02g14302	p2	(GA)13	26	1	26	PREDICTED: pollen-specific protein SF21-like [Cucumis sativus]	"cytoplasm"	-	-
Ai02g14313	p3	(CCT)5	15	30	44	hypothetical protein PRUPE_ppa002412mg [Prunus persica]	-	-	-
Ai02g14337	p3	(GGC)5	15	328	342	hypothetical protein POPTR_0006s27040g [Populus trichocarpa]	-	-	-
Ai02g14341	p3	(TCT)5	15	1840	1854	Uncharacterized protein isoform 1 [Theobroma cacao] gb|EOY29475.1| Uncharacterized protein isoform 1 [Theobroma cacao]	-	-	-
Ai02g14343	p3	(ACC)5	15	50	64	3-deoxy-d-arabino-heptulosonate 7-phosphate synthase isoform 1 [Theobroma cacao]	"chloroplast thylakoid"	"Phenylalanine	"3-deoxy-7-phosphoheptulonatesynthase."
Ai02g14355	p2	(GA)6	12	1015	1026	hypothetical protein POPTR_0002s08940g [Populus trichocarpa]	-	-	-
Ai02g14406	p3	(CCG)6	18	82	99	conserved hypothetical protein [Ricinus communis] gb|EEF46093.1| conserved hypothetical protein [Ricinus communis]	-	-	-
Ai02g14459	p3	(CAC)5	15	99	113	DORNROSCHEN-like, putative [Theobroma cacao]	-	-	-
Ai02g14466	p2	(CT)6	12	1002	1013	Nuclear transport factor 2 family protein with RNA binding domain isoform 1 [Theobroma cacao] gb|EOY03688.1| Nuclear transport factor 2 family protein with RNA binding domain isoform 1 [Theobroma cacao] gb|EOY03689.1| Nuclear transport factor 2 family protein with RNA binding domain isoform 1 [Theobroma cacao]	"cytoplasm"	-	"DNAhelicase."
Ai02g14477	p3	(GCA)9	27	3468	3494	NB-ARC domain-containing disease resistance protein, putative isoform 1 [Theobroma cacao]	"ADP binding"	"Plant-pathogen interaction"	-
Ai02g14507	p3	(AAC)8	24	790	813	hypothetical protein POPTR_0005s02730g [Populus trichocarpa]	"intracellular"	-	-
Ai02g14524	p3	(GAA)7	21	19	39	Transducin/WD40 repeat superfamily protein isoform 1 [Theobroma cacao] gb|EOX95660.1| Transducin/WD40 repeat superfamily protein isoform 1 [Theobroma cacao]	"cytoplasm"	-	"Non-specificserine/threonineproteinkinase."
Ai02g14536	p3	(AGG)6	18	125	142	28 kDa heat- and acid-stable phosphoprotein [Theobroma cacao]	"cell proliferation"	-	-
Ai02g14545	p2	(TA)8	16	319	334	TRAF-like family protein [Theobroma cacao]	-	-	-
Ai02g14550	p2	(GA)6	12	5794	5805	Phragmoplast orienting kinesin 1, putative [Theobroma cacao]	"cytoplasm"	-	-
Ai02g14557	p3	(TCC)6	18	336	353	WRKY DNA-binding protein 7 [Theobroma cacao]	"response to heat"	"Plant-pathogen interaction"	-
Ai02g14573	p3	(TCT)6	18	276	293	DHHC-type zinc finger family protein [Theobroma cacao]	"plasma membrane"	-	-
Ai02g14622	p3	(GAT)7	21	1075	1095	predicted protein [Populus trichocarpa] gb|EEE79122.1| hypothetical protein POPTR_0003s06210g [Populus trichocarpa]	-	-	-
Ai02g14651	p2	(AT)12	24	1679	1702	ENTH/VHS family protein, putative isoform 1 [Theobroma cacao]	"nucleoplasm"	"mRNA surveillance pathway"	-
Ai02g14693	p3	(AAC)5	15	643	657	COL [Populus tomentosa]	"intracellular"	"Circadian rhythm - plant"	-
Ai02g14721	p3	(CAT)6	18	905	922	Uncharacterized protein TCM_044382 [Theobroma cacao]	-	-	-
Ai02g14741	p2	(AG)6	12	1588	1599	predicted protein [Populus trichocarpa] gb|EEE99723.1| DC1 domain-containing family protein [Populus trichocarpa]	-	-	-
Ai02g14746	p3	(GAA)5	15	511	525	small heat-shock protein, putative [Ricinus communis] gb|EEF44792.1| small heat-shock protein, putative [Ricinus communis]	"response to heat"	-	-
Ai02g14749	p3	(GAA)7	21	898	918	Tetratricopeptide repeat-like superfamily protein, putative [Theobroma cacao]	-	-	-
Ai02g14771	p3	(AAT)11	33	544	576	Encodes a protein whose expression is responsive to nematode infection, putative [Theobroma cacao]	"plasma membrane"	-	-
Ai02g14800	p3	(CTC)5	15	122	136	RING/U-box superfamily protein, putative [Theobroma cacao]	-	-	-
Ai02g14817	p2	(AG)7	14	729	742	Pis v 2.0101 allergen11S globulin precusor [Pistacia vera]	"nutrient reservoir activity"	-	-
Ai02g14819	p3	(TCT)5	15	1585	1599	PREDICTED: uncharacterized protein LOC101306960 [Fragaria vesca subsp. vesca]	"transport"	-	-
Ai02g14835	p6	(AACCAG)5	30	1418	1447	Ubiquinol-cytochrome C chaperone family protein isoform 1 [Theobroma cacao]	-	-	-
Ai02g14837	p2	(TC)8	16	465	480	PREDICTED: uncharacterized protein LOC100820507 [Glycine max]	"carotene biosynthetic process"	-	-
Ai02g14857	p3	(CTC)9	27	93	119	PREDICTED: single-stranded DNA-binding protein, mitochondrial-like [Cucumis sativus] ref|XP_004157425.1| PREDICTED: single-stranded DNA-binding protein, mitochondrial-like [Cucumis sativus]	-	-	-
Ai02g14866	p1	(T)12	12	163	174	Poly(A) polymerase 1 isoform 1 [Theobroma cacao]	"ATP binding"	"mRNA surveillance pathway"	"Polynucleotideadenylyltransferase."
Ai02g14900	p3	(GAA)5	15	664	678	PHD5 [Morella rubra]	"chromatin modification"	-	-
Ai02g14908	p3	(GGA)6	18	48	65	hypothetical protein ARALYDRAFT_895912 [Arabidopsis lyrata subsp. lyrata] gb|EFH65535.1| hypothetical protein ARALYDRAFT_895912 [Arabidopsis lyrata subsp. lyrata]	"DNA binding"	"Cysteine and methionine metabolism"	"DNA(cytosine-5-)-methyltransferase."
Ai02g14908	p3	(GAA)7	21	961	981	hypothetical protein ARALYDRAFT_895912 [Arabidopsis lyrata subsp. lyrata] gb|EFH65535.1| hypothetical protein ARALYDRAFT_895912 [Arabidopsis lyrata subsp. lyrata]	"DNA binding"	"Cysteine and methionine metabolism"	"DNA(cytosine-5-)-methyltransferase."
Ai02g14915	p3	(ACA)6	18	138	155	C2H2-like zinc finger protein [Theobroma cacao]	-	-	-
Ai02g14934	p3	(AGC)6	18	481	498	hypothetical protein POPTR_0010s24220g [Populus trichocarpa]	-	-	-
Ai02g14943	p3	(ATC)7	21	1300	1320	Major facilitator superfamily protein [Theobroma cacao]	"substrate-specific transmembrane transporter activity"	-	-
Ai02g14950	p3	(AGT)5	15	178	192	Growth-regulating factor 5 isoform 2 [Theobroma cacao]	"ATP binding"	-	-
Ai02g14950	p3	(CTG)5	15	572	586	Growth-regulating factor 5 isoform 2 [Theobroma cacao]	"ATP binding"	-	-
Ai02g14950	p3	(TTC)6	18	918	935	Growth-regulating factor 5 isoform 2 [Theobroma cacao]	"ATP binding"	-	-
Ai02g14993	p3	(TGC)5	15	1863	1877	unnamed protein product [Blastocystis hominis]	"cytoplasm"	"Amyotrophic lateral sclerosis (ALS)"	"Acireductonesynthase."
Ai02g15017	p3	(TAA)7	21	294	314	hypothetical protein PRUPE_ppa001150mg [Prunus persica]	-	-	-
Ai02g15019	p3	(AGC)6	18	688	705	Two-component response regulator ARR9 isoform 2 [Theobroma cacao]	"cytokinin mediated signaling pathway"	"Plant hormone signal transduction"	-
Ai02g15033	p3	(TCT)6	18	292	309	F-box family protein isoform 2 [Theobroma cacao] gb|EOY23948.1| F-box family protein isoform 2 [Theobroma cacao]	"DNA binding"	-	-
Ai02g15033	p3	(AAG)5	15	955	969	F-box family protein isoform 2 [Theobroma cacao] gb|EOY23948.1| F-box family protein isoform 2 [Theobroma cacao]	"DNA binding"	-	-
Ai02g15055	p3	(GAG)5	15	406	420	U3 small nucleolar ribonucleoprotein protein mpp10, putative [Ricinus communis] gb|EEF51983.1| U3 small nucleolar ribonucleoprotein protein mpp10, putative [Ricinus communis]	"rRNA processing"	"Ribosome biogenesis in eukaryotes"	-
Ai02g15076	p2	(CT)6	12	2542	2553	kinase, putative [Ricinus communis] gb|EEF28957.1| kinase, putative [Ricinus communis]	"protein kinase activity"	-	"Non-specificserine/threonineproteinkinase."
Ai02g15091	p3	(CAG)5	15	2464	2478	Uncharacterized protein isoform 1 [Theobroma cacao]	-	-	-
Ai02g15104	p3	(ATC)6	18	635	652	MADS-box transcription factor family protein, putative [Theobroma cacao]	-	-	-
Ai02g15118	p3	(GCA)5	15	776	790	WUSCHEL-like protein [Citrus sinensis] gb|ADP02393.1| WUSCHEL [Citrus sinensis]	"flower development"	-	-
Ai02g15140	p3	(TCT)7	21	121	141	PREDICTED: uncharacterized protein C630.12-like [Glycine max]	-	-	-
Ai02g15165	p3	(TGA)5	15	615	629	Sequence-specific DNA binding transcription factors,transcription regulators, putative [Theobroma cacao]	"cell adhesion"	-	-
Ai02g15176	p3	(GAA)5	15	823	837	actin depolymerizing factor 4 [Hevea brasiliensis]	"intracellular"	"Regulation of actin cytoskeleton"	-
Ai02g15192	p3	(TGG)6	18	2034	2051	PREDICTED: DEAD-box ATP-dependent RNA helicase 3, chloroplastic [Vitis vinifera] emb|CBI39694.3| unnamed protein product [Vitis vinifera]	"ATP binding"	"RNA transport"	"RNAhelicase."
Ai02g15218	p3	(AAG)5	15	11	25	-	-	-	-
Ai02g15234	c	(CCA)8ccgaggcggttccggctgtacagaagcaaactgacgccgatgatatagaaaagaccgcggcaagtcaaagttatatacggcgg(AAT)5	122	77	198	-	-	-	-
Ai02g15235	p1	(T)10	10	133	142	Sec1/munc18-like (SM) proteins superfamily isoform 1 [Theobroma cacao]	"cytoplasm"	"Endocytosis"	-
Ai02g15236	p3	(GCC)6	18	67	84	-	-	-	-
Ai02g15268	c	(ACC)5(ATC)5	30	1	30	TCP4 [Citrus trifoliata]	"vegetative to reproductive phase transition of meristem"	-	-
Ai02g15272	p3	(GCT)6	18	592	609	hypothetical protein PRUPE_ppa015032mg [Prunus persica]	"DNA binding"	-	-
Ai02g15272	p3	(CTA)5	15	1199	1213	hypothetical protein PRUPE_ppa015032mg [Prunus persica]	"DNA binding"	-	-
Ai02g15279	p3	(AAC)5	15	383	397	NAC transcription factor 091 [Jatropha curcas]	-	-	-
Ai02g15291	p3	(AAG)7	21	511	531	hypothetical protein PRUPE_ppa024384mg [Prunus persica]	"rRNA processing"	"Pathogenic Escherichia coli infection"	-
Ai02g15316	p3	(AAC)5	15	962	976	TCP family transcription factor [Theobroma cacao]	"DNA binding"	-	-
Ai02g15316	p3	(ATC)5	15	1313	1327	TCP family transcription factor [Theobroma cacao]	"DNA binding"	-	-
Ai02g15329	p3	(TGA)9	27	1371	1397	hypothetical protein PRUPE_ppa004168mg [Prunus persica]	-	-	-
Ai02g15342	p3	(AGA)8	24	2589	2612	PREDICTED: LRR receptor-like serine/threonine-protein kinase FLS2-like [Vitis vinifera]	"stamen development"	"Plant-pathogen interaction"	"Non-specificserine/threonineproteinkinase."
Ai02g15344	p3	(GAC)5	15	2740	2754	PREDICTED: probable leucine-rich repeat receptor-like protein kinase At1g35710-like [Vitis vinifera]	"protein kinase activity"	"Plant-pathogen interaction"	"Non-specificserine/threonineproteinkinase."
Ai02g15360	p3	(TGT)5	15	99	113	PREDICTED: uncharacterized protein LOC100254146 [Vitis vinifera]	-	-	-
Ai02g15372	p3	(GCT)5	15	904	918	DNA binding protein, putative [Ricinus communis] gb|EEF48089.1| DNA binding protein, putative [Ricinus communis]	"nucleosome assembly"	-	-
Ai02g15413	p3	(TTC)6	18	123	140	Chaperone protein dnaJ 8, chloroplast precursor, putative [Ricinus communis] gb|EEF49240.1| Chaperone protein dnaJ 8, chloroplast precursor, putative [Ricinus communis]	"heat shock protein binding"	-	-
Ai02g15414	p2	(GA)6	12	778	789	Phosphatase 2C family protein [Theobroma cacao]	"catalytic activity"	"MAPK signaling pathway"	"Phosphoproteinphosphatase."
Ai02g15446	p3	(AGA)8	24	105	128	hypothetical protein POPTR_0009s05950g [Populus trichocarpa]	"killing of cells of other organism"	-	-
Ai02g15456	p3	(AGA)8	24	141	164	-	-	-	-
Ai02g15478	p3	(TGC)5	15	1260	1274	Beige-related and WD-40 repeat-containing protein isoform 1 [Theobroma cacao]	"platelet formation"	-	-
Ai02g15505	p3	(GAA)5	15	1054	1068	predicted protein [Populus trichocarpa]	"metabolic process"	"Flavone and flavonol biosynthesis"	"Cyanohydrinbeta-glucosyltransferase."
Ai02g15519	p3	(AGA)5	15	60	74	-	-	-	-
Ai02g15519	p3	(TGG)6	18	318	335	-	-	-	-
Ai02g15528	p3	(CTT)5	15	158	172	POX family protein, putative [Theobroma cacao]	"production of ta-siRNAs involved in RNA interference"	-	-
Ai02g15532	p3	(GGT)7	21	687	707	Alba DNA/RNA-binding protein isoform 2, partial [Theobroma cacao]	"nucleic acid binding"	"RNA transport"	-
Ai02g15533	p3	(GCT)9	27	331	357	Jasmonate-zim-domain protein 12, putative isoform 1 [Theobroma cacao] gb|EOY30106.1| Jasmonate-zim-domain protein 12, putative isoform 1 [Theobroma cacao]	"jasmonic acid mediated signaling pathway"	"Plant hormone signal transduction"	-
Ai02g15585	p3	(AGC)5	15	30	44	KNOTTED1-like homeobox gene 6 isoform 2 [Theobroma cacao]	"DNA binding"	-	-
Ai02g15665	p3	(GCT)6	18	817	834	Tropomyosin-related, putative isoform 1 [Theobroma cacao] gb|EOX93002.1| Tropomyosin-related, putative isoform 1 [Theobroma cacao] gb|EOX93003.1| Tropomyosin-related, putative isoform 1 [Theobroma cacao]	-	-	-
Ai02g15666	p3	(GAA)6	18	35	52	hypothetical protein PRUPE_ppa020302mg [Prunus persica]	-	-	-
Ai02g15671	p3	(GAA)8	24	414	437	PREDICTED: sperm-associated antigen 1-like [Glycine max]	"cytoplasm"	-	-
Ai02g15686	c	(AAG)16cagcagctgcttctcaacgtaaatctccaaagaagatggtgagcataaatgacaatgtggagacaataac(CAG)6	136	251	386	-	-	-	-
Ai02g15691	p3	(AAC)5	15	611	625	Uncharacterized protein TCM_026518 [Theobroma cacao]	-	-	-
Ai02g15742	p3	(GAT)5	15	1002	1016	hypothetical protein PRUPE_ppa024488mg [Prunus persica]	"cytoplasm"	-	-
Ai02g15789	p3	(TGG)6	18	111	128	predicted protein [Populus trichocarpa]	-	-	-
Ai02g15899	p3	(AGA)14	42	120	161	C2H2 and C2HC zinc fingers superfamily protein, putative [Theobroma cacao]	"intracellular"	-	-
Ai02g15929	p3	(TAT)7	21	1650	1670	Exostosin family protein [Theobroma cacao]	"fucose biosynthetic process"	-	-
Ai02g15938	p3	(CAG)5	15	100	114	Glycine cleavage T-protein family isoform 1 [Theobroma cacao]	"cytoplasm"	-	"Aminomethyltransferase."
Ai02g15954	p3	(AAG)7	21	590	610	conserved hypothetical protein [Ricinus communis] gb|EEF45782.1| conserved hypothetical protein [Ricinus communis]	-	-	-
Ai02g16023	p1	(A)10	10	1493	1502	Glycosyl hydrolases family 31 protein isoform 2 [Theobroma cacao]	"metabolic process"	"Galactose metabolism"	"Alpha-glucosidase."
Ai02g16045	p1	(A)10	10	911	920	PREDICTED: F-box protein SKIP23-like [Vitis vinifera]	"biological_process"	-	-
Ai02g16052	p3	(TGA)5	15	96	110	-	-	-	-
Ai02g16066	p3	(AAG)12	36	196	231	-	-	-	-
Ai02g16086	c	(ACT)10gtgagtgggaggagagc(TGA)5tgctgatgatgatgatcatgagannnnnnnnnnnnnnnnnnnnnnnnnnnnnnnnnnnnnnnnnnnnnnnnnnnnnnnnnnngtgagtgtgacgagagc(TGA)5	176	4	179	unnamed protein product [Vitis vinifera]	"DNA binding"	"Cysteine and methionine metabolism"	"DNA(cytosine-5-)-methyltransferase."
Ai02g16138	p3	(AGG)6	18	302	319	Basic helix-loop-helix protein BHLH20, putative [Theobroma cacao]	"transition metal ion transport"	-	-
Ai02g16146	p3	(CTC)6	18	32	49	hypothetical protein PRUPE_ppa010089mg [Prunus persica]	-	-	-
Ai02g16156	p3	(CGC)5	15	50	64	hypothetical protein PRUPE_ppa006139mg [Prunus persica]	"catalytic activity"	-	"GMPsynthase(glutamine-hydrolyzing)."
Ai02g16164	p3	(TGC)5	15	261	275	hypothetical protein POPTR_0013s01730g [Populus trichocarpa]	-	-	-
Ai02g16195	c	(CAG)10ttacaacagac(TCA)5	56	325	380	hypothetical protein POPTR_0003s03410g [Populus trichocarpa]	-	-	-
Ai02g16216	p3	(AAG)5	15	76	90	squalene epoxidase 1 protein [Azadirachta indica]	"metabolic process"	"Steroid biosynthesis"	"Squalenemonooxygenase."
Ai02g16222	p3	(TGC)5	15	687	701	FASCICLIN-like arabinogalactan-protein 11 [Theobroma cacao]	"plasma membrane"	-	-
Ai02g16234	p6	(CAAGAA)5	30	69	98	dead box ATP-dependent RNA helicase, putative [Ricinus communis] gb|EEF43533.1| dead box ATP-dependent RNA helicase, putative [Ricinus communis]	"rRNA processing"	"Spliceosome"	"RNAhelicase."
Ai02g16234	p3	(AAG)5	15	205	219	dead box ATP-dependent RNA helicase, putative [Ricinus communis] gb|EEF43533.1| dead box ATP-dependent RNA helicase, putative [Ricinus communis]	"rRNA processing"	"Spliceosome"	"RNAhelicase."
Ai02g16238	p3	(GGT)6	18	85	102	-	-	-	-
Ai02g16253	p3	(CAA)9	27	69	95	Uncharacterized protein TCM_012072 [Theobroma cacao]	-	-	-
Ai02g16270	p3	(CTC)7	21	147	167	-	-	-	-
Ai02g16276	p3	(GAA)5	15	55	69	Zinc knuckle family protein, putative [Theobroma cacao]	"cytoplasm"	-	-
Ai02g16276	p3	(CTT)5	15	263	277	Zinc knuckle family protein, putative [Theobroma cacao]	"cytoplasm"	-	-
Ai02g16277	p3	(CAG)7	21	115	135	Serine/threonine-protein kinase TOUSLED isoform 3 [Theobroma cacao]	"cytoplasm"	"mTOR signaling pathway"	"Non-specificserine/threonineproteinkinase."
Ai02g16281	p3	(AGA)5	15	77	91	Pentatricopeptide (PPR) repeat-containing protein, putative [Theobroma cacao]	"mitochondrion"	-	-
Ai02g16281	p3	(AAG)6	18	322	339	Pentatricopeptide (PPR) repeat-containing protein, putative [Theobroma cacao]	"mitochondrion"	-	-
Ai02g16310	p3	(GAG)5	15	71	85	-	-	-	-
Ai02g16332	p3	(TCA)8	24	295	318	Uncharacterized protein TCM_030660 [Theobroma cacao]	-	-	-
Ai02g16332	p3	(AGA)6	18	564	581	Uncharacterized protein TCM_030660 [Theobroma cacao]	-	-	-
Ai02g16332	p3	(AGA)8	24	708	731	Uncharacterized protein TCM_030660 [Theobroma cacao]	-	-	-
Ai02g16346	p3	(TTC)13	39	138	176	Uncharacterized protein TCM_015586 [Theobroma cacao]	-	-	-
Ai02g16354	p3	(CAG)5	15	727	741	Squamosa promoter binding protein-like 8 [Theobroma cacao]	"cytoplasm"	-	-
Ai02g16375	p3	(TGA)5	15	1014	1028	-	-	-	-
Ai02g16393	p3	(CAG)5	15	688	702	Duplicated homeodomain-like superfamily protein [Theobroma cacao]	"flower development"	-	-
Ai02g16404	p3	(GAA)5	15	298	312	Pinin-like protein [Theobroma cacao]	-	-	-
Ai02g16443	p2	(GA)9	18	466	483	Pentatricopeptide repeat (PPR) superfamily protein, putative [Theobroma cacao]	"biological_process"	-	-
Ai02g16508	p3	(TCT)6	18	97	114	Serine/threonine-protein kinase PBS1, putative [Ricinus communis] gb|EEF41283.1| Serine/threonine-protein kinase PBS1, putative [Ricinus communis]	"protein kinase activity"	"Plant-pathogen interaction"	"Non-specificserine/threonineproteinkinase."
Ai02g16531	p3	(AAG)8	24	395	418	hypothetical protein MTR_5g017500 [Medicago truncatula] gb|AES94713.1| hypothetical protein MTR_5g017500 [Medicago truncatula]	-	-	-
Ai02g16534	p6	(CAACAT)5	30	673	702	RING/FYVE/PHD zinc finger-containing protein, putative [Theobroma cacao]	-	-	-
Ai02g16542	p6	(CAACAG)6	36	1675	1710	Auxin response factor, putative [Ricinus communis] gb|EEF46232.1| Auxin response factor, putative [Ricinus communis]	"response to brassinosteroid stimulus"	"Plant hormone signal transduction"	-
Ai02g16556	p4	(GTGC)5	20	883	902	PREDICTED: uncharacterized protein LOC100255664 [Vitis vinifera]	-	-	-
Ai02g16623	p3	(CAG)10	30	439	468	Myb domain protein 79 isoform 2 [Theobroma cacao]	"response to salicylic acid stimulus"	-	-
Ai02g16644	p3	(GAA)5	15	6	20	predicted protein [Populus trichocarpa] gb|EEE88974.1| hypothetical protein POPTR_0008s14910g [Populus trichocarpa]	"biological_process"	-	-
Ai02g16647	p3	(AGG)5	15	69	83	hypothetical protein POPTR_0008s14880g [Populus trichocarpa]	"cytoplasm"	"MAPK signaling pathway"	"Mitogen-activatedproteinkinasekinasekinase."
Ai02g16652	p3	(ACC)5	15	660	674	RING-H2 group F1A, putative isoform 1 [Theobroma cacao]	"jasmonic acid mediated signaling pathway"	-	-
Ai02g16702	p3	(AAT)9	27	49	75	Ketose-bisphosphate aldolase class-II family protein isoform 5 [Theobroma cacao]	-	-	-
Ai02g16714	p5	(TGGGA)7	35	1	35	PREDICTED: cell division control protein 2 homolog [Vitis vinifera] emb|CBI38058.3| unnamed protein product [Vitis vinifera]	"protein kinase activity"	"p53 signaling pathway"	"[RNA-polymerase]-subunitkinase."
Ai02g16732	c	(AAC)9accgcaaataaagaagaggcaaaacgtcagcctcatcccaggaatgag(ACA)5	90	52	141	PREDICTED: calcium-dependent protein kinase 16 [Vitis vinifera] emb|CBI17375.3| unnamed protein product [Vitis vinifera]	"protein kinase activity"	"Plant-pathogen interaction"	"Non-specificserine/threonineproteinkinase."
Ai02g16746	p1	(A)10	10	427	436	alanine:glyoxylate aminotransferase 3 family protein [Populus trichocarpa]	"catalytic activity"	"Alanine	"Alanine--glyoxylatetransaminase."
Ai02g16760	p3	(TCT)5	15	36	50	predicted protein [Populus trichocarpa] gb|ABK94087.1| unknown [Populus trichocarpa] gb|EEE98791.1| hypothetical protein POPTR_0014s15480g [Populus trichocarpa]	-	-	-
Ai02g16768	p3	(GCA)6	18	882	899	predicted protein [Populus trichocarpa] gb|EEE79491.1| hypothetical protein POPTR_0003s13050g [Populus trichocarpa]	-	-	-
Ai02g16793	p6	(CACACG)6	36	97	132	-	-	-	-
Ai02g16840	p3	(ACC)5	15	1	15	-	-	-	-
Ai02g16847	p3	(CAC)5	15	542	556	C2H2 and C2HC zinc fingers superfamily protein [Theobroma cacao]	"intracellular"	-	-
Ai02g16880	p3	(GAT)9	27	3583	3609	hypothetical protein PRUPE_ppa026671mg [Prunus persica]	"cytidine to uridine editing"	-	-
Ai02g16883	p3	(CAG)6	18	1636	1653	C3HL domain class transcription factor isoform 1 [Theobroma cacao] gb|EOY09322.1| C3HL domain class transcription factor isoform 1 [Theobroma cacao] gb|EOY09323.1| C3HL domain class transcription factor isoform 1 [Theobroma cacao]	"cytoplasm"	-	-
Ai02g16890	p3	(GCA)7	21	35	55	HSP20-like chaperones superfamily protein [Theobroma cacao]	"cytoplasm"	"Protein processing in endoplasmic reticulum"	-
Ai02g16892	p3	(AGA)5	15	1124	1138	hypothetical protein VITISV_017285 [Vitis vinifera]	-	-	-
Ai02g16917	p3	(TTC)10	30	498	527	Selection and upkeep of intraepithelial T-cells protein 6, putative [Theobroma cacao]	-	-	-
Ai02g17003	p3	(GAA)6	18	426	443	PREDICTED: pentatricopeptide repeat-containing protein At2g27610-like [Vitis vinifera]	"biological_process"	-	-
Ai02g17016	p3	(CTT)7	21	155	175	Serine/arginine repetitive matrix protein 2, putative [Theobroma cacao]	-	-	-
Ai02g17022	p3	(CCT)8	24	67	90	hypothetical protein RCOM_1434920 [Ricinus communis] gb|EEF49958.1| hypothetical protein RCOM_1434920 [Ricinus communis]	-	-	-
Ai02g17032	p3	(CAA)6	18	1232	1249	predicted protein [Populus trichocarpa]	"protein kinase activity"	"Plant-pathogen interaction"	"Non-specificserine/threonineproteinkinase."
Ai02g17049	p3	(TTC)5	15	90	104	Late embryogenesis abundant hydroxyproline-rich glycoprotein family, putative isoform 1 [Theobroma cacao] gb|EOX92149.1| Late embryogenesis abundant hydroxyproline-rich glycoprotein family, putative isoform 1 [Theobroma cacao]	-	-	-
Ai02g17080	p3	(TCA)5	15	70	84	conserved hypothetical protein [Ricinus communis] gb|EEF32019.1| conserved hypothetical protein [Ricinus communis]	-	-	-
Ai02g17082	p3	(AGC)5	15	874	888	WRKY transcription factor 55 [Jatropha curcas]	"DNA binding"	-	-
Ai02g17106	p3	(CAG)5	15	487	501	LisH dimerization motif,WD40/YVTN repeat-like-containing domain isoform 2 [Theobroma cacao]	"production of ta-siRNAs involved in RNA interference"	"Ether lipid metabolism"	"Non-specificserine/threonineproteinkinase."
Ai02g17106	p3	(CAG)9	27	1405	1431	LisH dimerization motif,WD40/YVTN repeat-like-containing domain isoform 2 [Theobroma cacao]	"production of ta-siRNAs involved in RNA interference"	"Ether lipid metabolism"	"Non-specificserine/threonineproteinkinase."
Ai02g17129	p6	(GGTGCC)5	30	43	72	hypothetical protein AMTR_s00046p00069700 [Amborella trichopoda]	"O-methyltransferase activity"	"Phenylpropanoid biosynthesis"	"Caffeoyl-CoAO-methyltransferase."
Ai02g17131	p3	(AGG)10	30	111	140	Tubby like protein 8 isoform 1 [Theobroma cacao]	"stamen development"	-	-
Ai02g17137	p2	(CT)6	12	5	16	glycosyl hydrolase family 9 [Populus trichocarpa] gb|EEE80760.1| hypothetical protein POPTR_0002s20350g [Populus trichocarpa]	"cellular cell wall macromolecule metabolic process"	"Starch and sucrose metabolism"	"Cellulase."
Ai02g17155	p3	(CCG)5	15	200	214	PREDICTED: uncharacterized protein LOC100853208 [Vitis vinifera] emb|CBI26018.3| unnamed protein product [Vitis vinifera]	-	-	-
Ai02g17166	p3	(GAA)5	15	253	267	hypothetical protein PRUPE_ppa022710mg [Prunus persica]	"metabolic process"	"Steroid biosynthesis"	"Cycloartenolsynthase."
Ai02g17173	p3	(TGC)5	15	42	56	PREDICTED: polyadenylate-binding protein 2 [Vitis vinifera] emb|CBI21386.3| unnamed protein product [Vitis vinifera]	-	-	-
Ai02g17185	p3	(CAA)9	27	118	144	PREDICTED: thylakoid lumenal protein At1g03610, chloroplastic-like [Cicer arietinum]	"chloroplast thylakoid"	"Photosynthesis"	-
Ai02g17193	p3	(GAA)5	15	244	258	PREDICTED: uncharacterized protein LOC101303751 [Fragaria vesca subsp. vesca]	"collagen binding"	-	"Non-specificserine/threonineproteinkinase."
Ai02g17197	p3	(CAG)7	21	77	97	Uncharacterized protein TCM_000882 [Theobroma cacao]	-	-	-
Ai02g17207	c	(ATG)6(AGG)8	42	314	355	PREDICTED: uncharacterized protein LOC100786835 [Glycine max]	"transcription from RNA polymerase I promoter"	-	-
Ai02g17217	c	(GAT)5cagacaat(TGG)5	38	67	104	PREDICTED: uncharacterized protein LOC100855194 [Vitis vinifera]	-	-	-
Ai02g17230	p6	(GATGCC)6	36	1651	1686	cytochrome P450, putative [Ricinus communis] gb|EEF50061.1| cytochrome P450, putative [Ricinus communis]	"phosphatidylglycerol biosynthetic process"	"Arachidonic acid metabolism"	"Unspecificmonooxygenase."
Ai02g17236	p3	(TCT)9	27	232	258	-	-	-	-
Ai02g17305	p3	(CGC)7	21	20	40	conserved hypothetical protein [Ricinus communis] gb|EEF50254.1| conserved hypothetical protein [Ricinus communis]	-	-	-
Ai02g17361	p2	(AT)9	18	200	217	PREDICTED: GDSL esterase/lipase At5g14450-like [Fragaria vesca subsp. vesca]	"lipid catabolic process"	-	"Alpha-L-fucosidase."
Ai02g17379	p3	(AGG)5	15	438	452	Poly polymerase 1, putative [Theobroma cacao]	-	-	-
Ai02g17387	p3	(GGT)5	15	558	572	predicted protein [Populus trichocarpa]	-	-	-
Ai02g17406	p3	(CAG)5	15	28	42	hypothetical protein PRUPE_ppa009720mg [Prunus persica]	"cytoplasm"	"Antigen processing and presentation"	-
Ai02g17406	c	(GCA)5gtct(CAA)6	37	759	795	hypothetical protein PRUPE_ppa009720mg [Prunus persica]	"cytoplasm"	"Antigen processing and presentation"	-
Ai02g17422	p3	(GAA)7	21	88	108	-	-	-	-
Ai02g17423	p3	(AAG)5	15	212	226	-	-	-	-
Ai02g17454	p3	(TGG)5	15	60	74	PREDICTED: uncharacterized protein LOC100254466 [Vitis vinifera]	-	-	-
Ai02g17483	p3	(AAG)5	15	767	781	cytochrome P450 [Populus trichocarpa] gb|EEE81420.1| cytochrome P450 family protein [Populus trichocarpa]	"monooxygenase activity"	"Brassinosteroid biosynthesis"	"Taxadiene5-alpha-hydroxylase."
Ai02g17486	p3	(ATG)5	15	557	571	PREDICTED: uncharacterized protein LOC101299367 [Fragaria vesca subsp. vesca]	-	-	-
Ai02g17497	p2	(CT)6	12	122	133	PREDICTED: 5'-adenylylsulfate reductase 3, chloroplastic-like [Cucumis sativus]	"chloroplast thylakoid"	-	"Adenylyl-sulfatereductase(glutathione)."
Ai02g17505	p6	(AGCCAA)5	30	1014	1043	unnamed protein product [Vitis vinifera]	"transport"	-	-
Ai02g17509	p3	(CTT)8	24	107	130	Albina 1 [Theobroma cacao]	"ATP binding"	"Spliceosome"	"Magnesiumchelatase."
Ai02g17514	p1	(A)10	10	1670	1679	Histone acetyltransferase, putative [Theobroma cacao]	"chromatin modification"	"Basal transcription factors"	"Non-specificserine/threonineproteinkinase."
Ai02g17580	p2	(GA)7	14	889	902	PREDICTED: probable E3 ubiquitin-protein ligase RNF217-like [Fragaria vesca subsp. vesca]	"intracellular"	-	-
Ai02g17581	p3	(CAG)8	24	1380	1403	PREDICTED: uncharacterized protein LOC100257707 [Vitis vinifera]	"DNA binding"	"Circadian rhythm - plant"	-
Ai02g17600	p3	(ATG)7	21	1	21	unnamed protein product [Vitis vinifera]	-	-	-
Ai02g17628	p2	(CT)6	12	46	57	Leucine-rich repeat (LRR) family protein [Theobroma cacao]	"response to drug"	"Plant-pathogen interaction"	"Non-specificserine/threonineproteinkinase."
Ai02g17641	p3	(ACG)5	15	47	61	DNA cross-link repair protein pso2/snm1, putative [Ricinus communis] gb|EEF46166.1| DNA cross-link repair protein pso2/snm1, putative [Ricinus communis]	"response to stress"	"Non-homologous end-joining"	-
Ai02g17674	p3	(ATG)5	15	1203	1217	calreticulin, putative [Ricinus communis] sp|P93508.1|CALR_RICCO RecName: Full=Calreticulin; Flags: Precursor gb|AAB71419.1| calreticulin [Ricinus communis] gb|AAB71420.1| calreticulin [Ricinus communis] gb|EEF49953.1| calreticulin, putative [Ricinus communis]	"response to heat"	"Antigen processing and presentation"	-
Ai02g17716	p6	(CTCCTT)5	30	677	706	unnamed protein product [Vitis vinifera]	"synapsis"	-	-
Ai02g17757	p6	(ATTCAG)5	30	578	607	PREDICTED: serine/threonine-protein phosphatase 2A regulatory subunit B'' subunit alpha-like [Cucumis sativus]	"positive regulation of canonical Wnt receptor signaling pathway"	"mRNA surveillance pathway"	-
Ai02g17771	p3	(AAG)5	15	33	47	Cc-nbs-lrr resistance protein, putative [Theobroma cacao]	-	-	-
Ai02g17780	p3	(ACT)5	15	16	30	BTB/POZ domain-containing protein isoform 1 [Theobroma cacao] gb|EOY24817.1| BTB/POZ domain-containing protein isoform 1 [Theobroma cacao] gb|EOY24820.1| BTB/POZ domain-containing protein isoform 1 [Theobroma cacao]	"biological_process"	-	-
Ai02g17814	p3	(ACA)7	21	5	25	PREDICTED: general transcription factor IIF subunit 2 [Vitis vinifera]	"catalytic activity"	"Basal transcription factors"	"DNAhelicase."
Ai02g17837	p3	(AGC)6	18	4	21	zinc finger protein, putative [Ricinus communis] gb|EEF36474.1| zinc finger protein, putative [Ricinus communis]	"lipid catabolic process"	-	"Alpha-L-fucosidase."
Ai02g17838	p3	(TGC)11	33	4380	4412	Zinc ion binding protein isoform 1 [Theobroma cacao]	"lipid catabolic process"	-	-
Ai02g17885	p3	(TTC)5	15	35	49	Xyloglucan endotransglucosylase/hydrolase 2, putative [Theobroma cacao]	"metabolic process"	-	"Xyloglucan:xyloglucosyltransferase."
Ai02g17906	p3	(TTC)8	24	18	41	Uncharacterized protein TCM_019294 [Theobroma cacao]	-	-	-
Ai02g17936	c	(AAG)5gttatgaggccgactacagtcatcaatcaagcctaccttcttcttctgatcaagaagatgatcctcaaggcgaagaagtagaagcagaagaagaggag(GAA)5	128	77	204	S-adenosyl-L-methionine-dependent methyltransferases superfamily protein isoform 2 [Theobroma cacao]	-	-	-
Ai02g17941	p3	(TCC)8	24	336	359	predicted protein [Populus trichocarpa]	"biological_process"	-	-
Ai02g17948	p3	(CTA)5	15	134	148	glycosyltransferase, putative [Ricinus communis] gb|EEF52629.1| glycosyltransferase, putative [Ricinus communis]	-	-	-
Ai02g17971	p3	(GAT)5	15	361	375	conserved hypothetical protein [Ricinus communis] gb|EEF44033.1| conserved hypothetical protein [Ricinus communis]	-	-	-
Ai02g18001	p2	(TC)6	12	1367	1378	Ubiquitin carboxyl-terminal hydrolase 19, putative isoform 1 [Theobroma cacao] gb|EOY29252.1| Ubiquitin carboxyl-terminal hydrolase 19, putative isoform 1 [Theobroma cacao]	"peptidase activity"	-	"Ubiquitinylhydrolase1."
Ai02g18028	p3	(TCT)7	21	76	96	Adenylate kinase family protein isoform 1 [Theobroma cacao] gb|EOY31329.1| Adenylate kinase family protein isoform 1 [Theobroma cacao]	"ATP binding"	"Purine metabolism"	"Adenylatekinase."
Ai02g18032	p1	(A)11	11	5521	5531	Dicer-like protein, putative isoform 1 [Theobroma cacao]	"stamen development"	"Plant-pathogen interaction"	"Non-specificserine/threonineproteinkinase."
Ai02g18040	p6	(TTAGCA)7	42	997	1038	Inositol 1,3,4-trisphosphate 5/6-kinase family protein [Theobroma cacao]	"intracellular"	"Phosphatidylinositol signaling system"	"Inositol-tetrakisphosphate1-kinase."
Ai02g18068	p3	(GAG)5	15	64	78	Vacuolar protein sorting-associated protein 41 isoform 1 [Theobroma cacao]	"protein targeting to vacuole"	-	-
Ai02g18098	p3	(CGT)8	24	80	103	hypothetical protein PRUPE_ppa006157mg [Prunus persica]	-	-	-
Ai02g18098	p6	(TGCAAC)5	30	1313	1342	hypothetical protein PRUPE_ppa006157mg [Prunus persica]	-	-	-
Ai02g18111	p3	(GCA)5	15	41	55	-	-	-	-
Ai02g18112	p3	(TCT)5	15	127	141	hypothetical protein POPTR_0019s11030g [Populus trichocarpa]	-	-	-
Ai02g18176	p3	(ATG)9	27	572	598	hypothetical protein POPTR_0005s11160g [Populus trichocarpa] gb|ERP60856.1| F-box family protein [Populus trichocarpa]	-	-	-
Ai02g18183	p3	(CGA)6	18	501	518	cysteine desulfurylase, putative [Ricinus communis] gb|EEF39150.1| cysteine desulfurylase, putative [Ricinus communis]	"metabolic process"	"Thiamine metabolism"	"Cysteinedesulfurase."
Ai02g18186	p3	(TCA)5	15	1705	1719	Monovalent cation:proton antiporter, putative [Theobroma cacao]	"sodium ion transport"	-	-
Ai02g18258	p3	(ACA)7	21	959	979	Glucan endo-1,3-beta-glucosidase precursor, putative [Ricinus communis] gb|EEF43463.1| Glucan endo-1,3-beta-glucosidase precursor, putative [Ricinus communis]	"metabolic process"	-	"Glucanendo-1
Ai02g18265	p3	(TCA)5	15	177	191	unnamed protein product [Vitis vinifera]	-	-	-
Ai02g18265	p3	(GAA)6	18	334	351	unnamed protein product [Vitis vinifera]	-	-	-
Ai02g18274	c	(TCA)5gcaatatcatataccaacgctacttactacaacaccagtagta(CAG)6	76	439	514	Myb domain protein 36 [Theobroma cacao]	"response to salicylic acid stimulus"	-	-
Ai02g18304	p3	(GAA)6	18	421	438	Uncharacterized protein TCM_009543 [Theobroma cacao]	-	-	-
Ai02g18361	p3	(GAA)5	15	456	470	PREDICTED: uncharacterized protein LOC100259118 [Vitis vinifera]	-	-	-
Ai02g18375	p3	(TCA)9	27	1978	2004	hypothetical protein PRUPE_ppa001313mg [Prunus persica]	"leaf senescence"	-	-
Ai02g18379	p3	(TGC)6	18	48	65	PREDICTED: transcription factor UNE12-like, partial [Cucumis sativus]	"regulation of defense response"	-	-
Ai02g18390	p3	(GAA)5	15	1230	1244	conserved hypothetical protein [Ricinus communis] gb|EEF34878.1| conserved hypothetical protein [Ricinus communis]	"cytoplasm"	-	-
Ai02g18407	p3	(CCT)5	15	79	93	PREDICTED: uncharacterized protein LOC100252686 [Vitis vinifera]	-	-	-
Ai02g18436	p3	(TGC)6	18	1938	1955	predicted protein [Populus trichocarpa]	"chloroplast RNA processing"	-	-
Ai02g18473	p3	(GAA)5	15	172	186	membrane associated ring finger 1,8, putative [Ricinus communis] gb|EEF47864.1| membrane associated ring finger 1,8, putative [Ricinus communis]	-	-	-
Ai02g18487	p3	(TAC)5	15	108	122	-	-	-	-
Ai02g18524	p3	(GAT)14	42	112	153	PREDICTED: ankyrin repeat-containing protein At3g12360-like [Fragaria vesca subsp. vesca]	-	-	-
Ai02g18569	p3	(CAT)5	15	11	25	Myb domain protein 5, putative [Theobroma cacao]	"DNA binding"	-	-
Ai02g18587	p2	(TC)6	12	130	141	hypothetical protein POPTR_0479s00200g [Populus trichocarpa]	-	-	-
Ai02g18655	p3	(AGA)6	18	17	34	hypothetical protein PRUPE_ppa001719mg [Prunus persica]	-	-	-
Ai02g18664	p3	(CAG)5	15	268	282	Growth-regulating factor 1 [Theobroma cacao]	"ATP binding"	-	-
Ai02g18670	p3	(GAA)5	15	370	384	PREDICTED: uncharacterized protein KIAA0930 homolog [Vitis vinifera] emb|CBI19370.3| unnamed protein product [Vitis vinifera]	-	-	-
Ai02g18673	p3	(GAA)6	18	481	498	BSD domain-containing protein, putative [Theobroma cacao]	-	-	-
Ai02g18674	p3	(TGG)7	21	1200	1220	E3 ubiquitin ligase PUB14, putative [Ricinus communis] gb|EEF52258.1| E3 ubiquitin ligase PUB14, putative [Ricinus communis]	"protein ubiquitination"	"Glycerophospholipid metabolism"	"Phosphatidylcholine--sterolO-acyltransferase."
Ai02g18680	p3	(GAA)7	21	145	165	Uncharacterized protein TCM_034679 [Theobroma cacao]	-	-	-
Ai02g18696	p3	(TCT)6	18	148	165	predicted protein [Populus trichocarpa]	"proline transport"	-	-
Ai02g18706	p3	(CAG)7	21	4361	4381	NB-ARC domain-containing disease resistance protein, putative isoform 2 [Theobroma cacao]	"ADP binding"	"Plant-pathogen interaction"	-
Ai02g18741	p3	(GAA)6	18	640	657	hypothetical protein SELMODRAFT_105213 [Selaginella moellendorffii] gb|EFJ22664.1| hypothetical protein SELMODRAFT_105213 [Selaginella moellendorffii]	"DNA binding"	-	-
Ai02g18764	p6	(TTCACC)5	30	597	626	Protein ABIL2, putative [Ricinus communis] gb|EEF45668.1| Protein ABIL2, putative [Ricinus communis]	"cytoplasm"	-	-
Ai02g18766	p3	(ACG)8	24	4	27	hypothetical protein PRUPE_ppa006627mg [Prunus persica]	-	-	-
Ai02g18796	p6	(TTCCAT)5	30	299	328	Actin cytoskeleton-regulatory complex protein pan1, putative isoform 1 [Theobroma cacao]	-	-	-
Ai02g18819	p2	(TC)6	12	1466	1477	PREDICTED: uncharacterized protein LOC101252581 [Solanum lycopersicum]	"peptidase activity"	"Cyanoamino acid metabolism"	"Sinapoylglucose--cholineO-sinapoyltransferase."
Ai02g18828	p3	(TGA)10	30	183	212	Hydroxyproline-rich glycoprotein family protein, putative isoform 2 [Theobroma cacao]	-	-	-
Ai02g18838	p3	(CAT)6	18	5	22	Galactose-1-phosphate uridylyltransferase [Theobroma cacao]	"positive regulation of cellular response to phosphate starvation"	"Galactose metabolism"	"UDP-glucose--hexose-1-phosphateuridylyltransferase."
Ai02g18839	p2	(GA)10	20	2263	2282	Kinase family protein [Theobroma cacao]	"protein kinase activity"	"Wnt signaling pathway"	"Non-specificserine/threonineproteinkinase."
Ai02g18893	p3	(TGA)7	21	156	176	-	-	-	-
Ai02g18920	p3	(TGC)5	15	111	125	-	-	-	-
Ai02g18920	p3	(GCT)5	15	265	279	-	-	-	-
Ai02g18929	p3	(CTG)6	18	62	79	Dipeptide transport ATP-binding protein dppF [Theobroma cacao]	-	-	-
Ai02g18931	p3	(ACC)7	21	1149	1169	predicted protein [Populus trichocarpa]	"DNA binding"	-	-
Ai02g18977	p3	(GTG)5	15	269	283	hypothetical protein VITISV_005987 [Vitis vinifera]	-	-	-
Ai02g18982	p3	(GAA)8	24	279	302	Uncharacterized protein TCM_021048 [Theobroma cacao]	-	-	-
Ai02g18991	p3	(GTG)6	18	911	928	conserved hypothetical protein [Ricinus communis] gb|EEF34916.1| conserved hypothetical protein [Ricinus communis]	-	-	-
Ai02g19063	p3	(GAT)8	24	160	183	Pleiotropic drug resistance 9 [Theobroma cacao]	"auxin polar transport"	-	-
Ai02g19082	p3	(AAG)13	39	508	546	Uncharacterized protein TCM_016223 [Theobroma cacao]	-	-	-
Ai02g19093	p4	(GATC)6	24	97	120	Uncharacterized protein isoform 1 [Theobroma cacao]	"embryo development"	"Plant hormone signal transduction"	-
Ai02g19131	p3	(AGC)5	15	1752	1766	unnamed protein product [Vitis vinifera]	-	-	-
Ai02g19189	p3	(CAC)5	15	1091	1105	PREDICTED: splicing factor 3B subunit 4 [Vitis vinifera]	"nucleoplasm"	"RNA transport"	-
Ai02g19218	p2	(GA)7	14	62	75	-	-	-	-
Ai02g19232	p3	(ATC)9	27	602	628	hypothetical protein [Citrus clementina]	"DNA binding"	-	-
Ai02g19235	c	(CAA)5(CAG)7	36	865	900	PREDICTED: putative elongation of fatty acids protein DDB_G0272012-like [Solanum lycopersicum]	-	-	-
Ai02g19248	p3	(AGT)6	18	283	300	predicted protein [Populus trichocarpa] gb|EEE98249.1| hypothetical protein POPTR_0011s14910g [Populus trichocarpa]	-	-	-
Ai02g19251	p1	(T)10	10	400	409	ABC transporter family, cholesterol/phospholipid flippase isoform 1 [Theobroma cacao]	"protein glycosylation"	"ABC transporters"	"Polyamine-transportingATPase."
Ai02g19251	p3	(GTG)6	18	3053	3070	ABC transporter family, cholesterol/phospholipid flippase isoform 1 [Theobroma cacao]	"protein glycosylation"	"ABC transporters"	"Polyamine-transportingATPase."
Ai02g19292	p3	(GGT)5	15	79	93	Autophagy 18 G [Theobroma cacao]	"cytoplasm"	-	-
Ai02g19325	c	(CTC)5gc(CAT)5	32	90	121	PREDICTED: pentatricopeptide repeat-containing protein At2g17525, mitochondrial-like [Vitis vinifera]	"mitochondrion"	-	-
Ai02g19347	p3	(TTC)7	21	63	83	Uncharacterized protein TCM_040716 [Theobroma cacao]	-	-	-
Ai02g19360	p3	(CTC)6	18	186	203	germin-like protein 6 precursor [Vitis vinifera] gb|ABL60875.1| germin-like protein 6 [Vitis vinifera]	"manganese ion binding"	-	"Superoxidedismutase."
Ai02g19372	p3	(GCA)5	15	888	902	receptor protein kinase, putative [Ricinus communis] gb|EEF30288.1| receptor protein kinase, putative [Ricinus communis]	"protein kinase activity"	"Leishmaniasis"	"Non-specificserine/threonineproteinkinase."
Ai02g19374	p3	(AGC)5	15	893	907	conserved hypothetical protein [Ricinus communis] gb|EEF42317.1| conserved hypothetical protein [Ricinus communis]	-	-	-
Ai02g19375	p3	(TCC)5	15	1	15	hypothetical protein PRUPE_ppa003525mg [Prunus persica]	"cytoplasm"	"Spliceosome"	"RNAhelicase."
Ai02g19381	p2	(CT)6	12	591	602	-	-	-	-
Ai02g19382	p3	(AAG)6	18	883	900	zinc finger protein, putative [Ricinus communis] gb|EEF30957.1| zinc finger protein, putative [Ricinus communis]	"protein ubiquitination"	-	-
Ai02g19384	p3	(AGC)7	21	13	33	fused compound leaf 2 [Glycine max]	-	-	-
Ai02g19407	p3	(CAG)7	21	201	221	Uncharacterized protein isoform 1 [Theobroma cacao]	-	-	-
Ai02g19438	p3	(TTC)5	15	117	131	hypothetical protein POPTR_0006s28790g [Populus trichocarpa]	-	-	-
Ai02g19438	c	(GAC)6(GAA)6	36	577	612	hypothetical protein POPTR_0006s28790g [Populus trichocarpa]	-	-	-
Ai02g19500	p2	(CT)6	12	1231	1242	hypothetical protein VITISV_023640 [Vitis vinifera]	"DNA binding"	"Mismatch repair"	"Microtubule-severingATPase."
Ai02g19524	p3	(CTT)7	21	34	54	-	-	-	-
Ai02g19534	p2	(TC)6	12	2195	2206	PREDICTED: K(+) efflux antiporter 5-like isoform X1 [Cicer arietinum]	"sodium ion transport"	-	-
Ai02g19557	p3	(TTC)5	15	153	167	CC-NBS-LRR protein, partial [Theobroma cacao]	"ADP binding"	-	-
Ai02g19611	p3	(CAT)5	15	107	121	-	-	-	-
Ai02g19613	p3	(CTG)5	15	3629	3643	Condensin-2 complex subunit D3 isoform 1 [Theobroma cacao]	"nuclear condensin complex"	-	-
Ai02g19622	p3	(ATC)6	18	602	619	Ethylene response factor 1 [Theobroma cacao]	"jasmonic acid mediated signaling pathway"	"Plant hormone signal transduction"	-
Ai02g19662	p3	(GCA)8	24	51	74	Chromo domain protein, putative [Ricinus communis] gb|EEF50551.1| Chromo domain protein, putative [Ricinus communis]	"DNA binding"	-	"DNAhelicase."
Ai02g19664	p3	(AAG)5	15	2230	2244	hypothetical protein CARUB_v10003441mg, partial [Capsella rubella]	"protein kinase activity"	"Plant hormone signal transduction"	"Non-specificserine/threonineproteinkinase."
Ai02g19674	p3	(TGA)5	15	11	25	hypothetical protein RCOM_1313640 [Ricinus communis] gb|EEF43453.1| hypothetical protein RCOM_1313640 [Ricinus communis]	-	-	-
Ai02g19682	p3	(CTT)9	27	32	58	arsenical pump-driving atpase, putative [Ricinus communis] gb|EEF31448.1| arsenical pump-driving atpase, putative [Ricinus communis]	"response to arsenic-containing substance"	-	"Arsenite-transportingATPase."
Ai02g19690	p2	(CT)8	16	2169	2184	hypothetical protein PRUPE_ppa001658mg [Prunus persica]	"cytosol"	-	-
Ai02g19696	p1	(T)11	11	8	18	dead box ATP-dependent RNA helicase, putative [Ricinus communis] gb|EEF50500.1| dead box ATP-dependent RNA helicase, putative [Ricinus communis]	"cytoplasm"	"RNA transport"	"RNAhelicase."
Ai02g19719	p3	(GAA)7	21	76	96	Pseudouridine synthase family protein isoform 4 [Theobroma cacao]	"RNA modification"	-	"tRNApseudouridine(38-40)synthase."
Ai02g19723	p3	(AAG)7	21	4349	4369	LRR and NB-ARC domains-containing disease resistance protein, putative [Theobroma cacao]	"ADP binding"	"Plant-pathogen interaction"	-
Ai02g19746	p3	(CTA)7	21	1262	1282	Pseudo response regulator, putative isoform 7, partial [Theobroma cacao]	"DNA binding"	"Circadian rhythm - plant"	-
Ai02g19764	p3	(AGA)11	33	225	257	predicted protein [Populus trichocarpa] gb|EEE79830.1| hypothetical protein POPTR_0003s20930g [Populus trichocarpa]	-	-	-
Ai02g19785	p1	(A)12	12	391	402	PREDICTED: putative E3 ubiquitin-protein ligase LIN-1-like [Solanum lycopersicum]	"nodulation"	-	-
Ai02g19828	p3	(GAA)5	15	84	98	hypothetical protein VITISV_027616 [Vitis vinifera]	-	-	-
Ai02g19837	p3	(GCA)5	15	2779	2793	Diacylglycerol kinase family protein isoform 1 [Theobroma cacao]	"response to heat"	"Sphingolipid metabolism"	"Ceramidekinase."
Ai02g19879	c	(ACC)5acaacctttgcaatcttcgttgttagttcctaaaactattcagaaaagttatgtgacc(CCT)9	100	1764	1863	PREDICTED: uncharacterized protein LOC100249142 [Vitis vinifera]	"actin cytoskeleton organization"	-	-
Ai02g19915	p3	(ATG)5	15	1481	1495	Heat shock protein binding protein, putative isoform 1 [Theobroma cacao] gb|EOY23475.1| Heat shock protein binding protein, putative isoform 1 [Theobroma cacao]	"heat shock protein binding"	-	-
Ai02g19928	p3	(CAG)7	21	260	280	DNA binding protein, putative [Ricinus communis] gb|EEF48992.1| DNA binding protein, putative [Ricinus communis]	"DNA binding"	-	-
Ai02g19936	p3	(AGC)5	15	985	999	Myb domain protein 105, putative [Theobroma cacao]	"response to salicylic acid stimulus"	-	-
Ai02g19956	p3	(ATG)5	15	652	666	hypothetical protein PRUPE_ppa006032mg [Prunus persica]	"aspartic-type endopeptidase activity"	-	-
Ai02g20007	p1	(A)11	11	1024	1034	PREDICTED: uncharacterized protein LOC101291061 [Fragaria vesca subsp. vesca]	-	-	-
Ai02g20008	p3	(AGA)7	21	306	326	GTP binding protein, putative [Ricinus communis] gb|EEF42303.1| GTP binding protein, putative [Ricinus communis]	"biological_process"	-	-
Ai02g20015	p2	(AG)6	12	306	317	hypothetical protein PRUPE_ppa007087mg [Prunus persica]	"cytoplasm"	"Spliceosome"	-
Ai02g20035	p3	(GCT)6	18	10	27	predicted protein [Populus trichocarpa]	"peptidase activity"	-	"Methionylaminopeptidase."
Ai02g20039	p3	(GGT)5	15	35	49	PREDICTED: uncharacterized protein LOC100246307 [Vitis vinifera]	"calcium ion binding"	-	-
Ai02g20047	p3	(CAC)6	18	3027	3044	hypothetical protein VITISV_042269 [Vitis vinifera]	"biological_process"	-	-
Ai02g20054	p3	(ATG)5	15	1568	1582	hypothetical protein POPTR_0001s13760g [Populus trichocarpa] gb|ERP65442.1| hypothetical protein POPTR_0001s13760g [Populus trichocarpa]	"heat shock protein binding"	"Protein processing in endoplasmic reticulum"	-
Ai02g20096	p3	(GCA)6	18	31	48	Uncharacterized protein TCM_039966 [Theobroma cacao]	-	-	-
Ai02g20110	p6	(ATGAAG)5	30	262	291	conserved hypothetical protein [Ricinus communis] gb|EEF42431.1| conserved hypothetical protein [Ricinus communis]	-	-	-
Ai02g20130	p3	(GCA)6	18	1661	1678	PREDICTED: NADPH:quinone oxidoreductase [Vitis vinifera] emb|CBI35123.3| unnamed protein product [Vitis vinifera]	"NAD(P)H dehydrogenase (quinone) activity"	-	"NAD(P)Hdehydrogenase(quinone)."
Ai02g20140	p3	(CTG)5	15	569	583	Myo-inositol monophosphatase like 1 isoform 1 [Theobroma cacao] gb|EOY27546.1| Myo-inositol monophosphatase like 1 isoform 1 [Theobroma cacao] gb|EOY27547.1| Myo-inositol monophosphatase like 1 isoform 1 [Theobroma cacao] gb|EOY27548.1| Myo-inositol monophosphatase like 1 isoform 1 [Theobroma cacao]	"phosphatidylinositol phosphorylation"	"Phosphatidylinositol signaling system"	"Inositol-phosphatephosphatase."
Ai02g20151	p3	(ATG)5	15	1010	1024	MUTM-1 isoform 2 [Theobroma cacao]	"nucleotide-excision repair"	-	"DNA-formamidopyrimidineglycosylase."
Ai02g20176	p3	(GAT)12	36	52	87	RING/U-box superfamily protein isoform 1 [Theobroma cacao] gb|EOY14662.1| RING/U-box superfamily protein isoform 1 [Theobroma cacao] gb|EOY14663.1| RING/U-box superfamily protein isoform 1 [Theobroma cacao]	"protein ubiquitination"	-	-
Ai02g20187	p3	(AAC)6	18	437	454	hypothetical protein PRUPE_ppa027072mg [Prunus persica]	"intracellular"	"Antigen processing and presentation"	-
Ai02g20221	p3	(AGA)9	27	440	466	hypothetical protein VITISV_038844 [Vitis vinifera]	"ribosome biogenesis"	"Ribosome biogenesis in eukaryotes"	-
Ai02g20261	p3	(GAA)6	18	88	105	-	-	-	-
Ai02g20262	p3	(TAC)9	27	888	914	hypothetical protein PRUPE_ppa004352mg [Prunus persica]	"RNA modification"	-	-
Ai02g20299	p3	(ATG)9	27	4010	4036	Telomere maintenance component 1, putative isoform 1 [Theobroma cacao]	"DNA binding"	-	-
Ai02g20306	p6	(TGCTTA)5	30	783	812	serpin-like protein, partial [Citrus x paradisi]	"negative regulation of peptidase activity"	"Complement and coagulation cascades"	-
Ai02g20310	p3	(AAC)8	24	581	604	Transferases, transferring glycosyl groups [Theobroma cacao]	"biological_process"	-	-
Ai02g20346	p3	(CTT)8	24	32	55	Plant invertase/pectin methylesterase inhibitor superfamily [Theobroma cacao]	"negative regulation of catalytic activity"	"Pentose and glucuronate interconversions"	"Pectinesterase."
Ai02g20360	p3	(CAC)10	30	7	36	Kinase protein with adenine nucleotide alpha hydrolases-like domain, putative isoform 1 [Theobroma cacao]	"protein kinase activity"	"Plant-pathogen interaction"	"Non-specificserine/threonineproteinkinase."
Ai02g20381	p3	(GAC)7	21	67	87	predicted protein [Populus trichocarpa] gb|EEE82008.1| zinc finger family protein [Populus trichocarpa]	"cytoplasm"	-	-
Ai02g20432	p3	(GAT)5	15	1237	1251	inositol or phosphatidylinositol kinase, putative [Ricinus communis] gb|EEF38703.1| inositol or phosphatidylinositol kinase, putative [Ricinus communis]	"phosphotransferase activity	-	"1-phosphatidylinositol4-kinase."
Ai02g20437	p3	(ACT)5	15	127	141	CLE20 protein [Glycine max]	-	-	-
Ai02g20440	p3	(CAA)7	21	5	25	DUF26 domain-containing protein 1 precursor, putative [Ricinus communis] gb|EEF31370.1| DUF26 domain-containing protein 1 precursor, putative [Ricinus communis]	"biological_process"	"Lysosome"	"Chymopapain."
Ai02g20463	p3	(CAT)6	18	298	315	hypothetical protein PRUPE_ppa010440mg [Prunus persica]	-	-	-
Ai02g20488	p3	(GAA)5	15	1357	1371	STELAR K+ outward rectifier isoform 1 [Theobroma cacao]	"ion channel activity"	-	"Asparaginase."
Ai02g20490	p3	(GAA)6	18	16	33	hypothetical protein POPTR_0015s05370g [Populus trichocarpa]	"protein ADP-ribosylation"	"Phototransduction"	-
Ai02g20490	p3	(GAA)6	18	396	413	hypothetical protein POPTR_0015s05370g [Populus trichocarpa]	"protein ADP-ribosylation"	"Phototransduction"	-
Ai02g20519	p3	(GCA)12	36	435	470	PREDICTED: LOB domain-containing protein 11-like [Cicer arietinum]	"biological_process"	-	-
Ai02g20520	p3	(GCA)9	27	633	659	LOB domain-containing protein 1 [Theobroma cacao]	"biological_process"	-	-
Ai02g20558	p3	(GAA)5	15	268	282	-	-	-	-
Ai02g20581	p3	(GCT)7	21	4087	4107	Structural maintenance of chromosome 1 protein, putative isoform 2 [Theobroma cacao]	"cytoplasm"	"Cell cycle - yeast"	-
Ai02g20598	p3	(GCA)5	15	558	572	transcription factor, putative [Ricinus communis] gb|EEF46587.1| transcription factor, putative [Ricinus communis]	-	-	-
Ai02g20605	p3	(TCA)10	30	660	689	Homeodomain-like superfamily protein, putative isoform 1 [Theobroma cacao]	"DNA binding"	-	-
Ai02g20607	p3	(AGC)7	21	794	814	Basic helix-loop-helix DNA-binding superfamily protein, putative isoform 1 [Theobroma cacao]	"DNA binding"	-	-
Ai02g20613	c	(GAT)5gg(TGA)5	32	175	206	-	-	-	-
Ai02g20621	p6	(CAAGCT)6	36	100	135	Uncharacterized protein TCM_005803 [Theobroma cacao]	-	-	-
Ai02g20631	p3	(CAG)8	24	70	93	hypothetical protein RCOM_1469330 [Ricinus communis] gb|EEF47744.1| hypothetical protein RCOM_1469330 [Ricinus communis]	"DNA binding"	-	-
Ai02g20635	p5	(AGGGA)5	25	98	122	-	-	-	-
Ai02g20638	p3	(TGG)5	15	237	251	uncharacterized protein LOC100500441 [Glycine max] gb|ACU15528.1| unknown [Glycine max]	-	-	-
Ai02g20651	p3	(ATC)6	18	236	253	hypothetical protein POPTR_0007s04220g [Populus trichocarpa]	"response to chitin"	-	-
Ai02g20658	p3	(CGT)7	21	536	556	hypothetical protein PRUPE_ppa024364mg, partial [Prunus persica]	-	-	-
Ai02g20659	p3	(TCG)5	15	2110	2124	Xanthine/uracil permease family protein isoform 1 [Theobroma cacao]	"polarity specification of adaxial/abaxial axis"	-	-
Ai02g20673	p3	(ATA)5	15	269	283	-	-	-	-
Ai02g20702	c	(CAA)7(CAG)6	39	595	633	hypothetical protein POPTR_0012s11030g [Populus trichocarpa]	"DNA binding"	-	-
Ai02g20715	p3	(GGT)5	15	1903	1917	oligopeptidase B, putative [Ricinus communis] gb|EEF47691.1| oligopeptidase B, putative [Ricinus communis]	"peptidase activity"	-	"OligopeptidaseB."
Ai02g20744	p3	(GAA)8	24	1005	1028	PREDICTED: purine permease 3 [Vitis vinifera] emb|CAN64392.1| hypothetical protein VITISV_015235 [Vitis vinifera]	"purine base transmembrane transporter activity"	-	-
Ai02g20803	p3	(TCC)7	21	291	311	Basic helix-loop-helix DNA-binding superfamily protein isoform 1 [Theobroma cacao]	"DNA binding"	-	-
Ai02g20804	p3	(CAT)6	18	700	717	hypothetical protein POPTR_0004s23860g, partial [Populus trichocarpa]	"gibberellin biosynthetic process"	-	-
Ai02g20805	p3	(CGG)6	18	56	73	Uncharacterized protein isoform 2 [Theobroma cacao]	"biological_process"	-	-
Ai02g20811	p3	(GCA)7	21	426	446	Uncharacterized protein isoform 3 [Theobroma cacao]	-	-	-
Ai02g20833	p3	(GAT)5	15	6979	6993	E3 ubiquitin-protein ligase UPL2 isoform 1 [Theobroma cacao]	"intracellular"	"Endocytosis"	"Non-specificserine/threonineproteinkinase."
Ai02g20855	p3	(AGC)5	15	1494	1508	hypothetical protein POPTR_0010s03070g [Populus trichocarpa]	"cytoplasm"	"Gap junction"	"Mitogen-activatedproteinkinase."
Ai02g20878	p3	(GAT)5	15	1141	1155	Phosphoglycerate mutase-like family protein isoform 2 [Theobroma cacao] gb|EOY03352.1| Phosphoglycerate mutase-like family protein isoform 2 [Theobroma cacao]	"diphosphoinositol-pentakisphosphate kinase activity"	-	"Diphosphoinositol-pentakisphosphatekinase."
Ai02g20920	p3	(GAA)5	15	171	185	HMG-box DNA-binding family protein isoform 1 [Theobroma cacao]	"DNA binding"	"Base excision repair"	-
Ai02g20947	p3	(CCG)5	15	778	792	Uncharacterized protein TCM_014746 [Theobroma cacao]	-	-	-
Ai02g20949	p6	(CCATAG)6	36	1181	1216	tRNA-dihydrouridine synthase A, putative [Ricinus communis] gb|EEF44623.1| tRNA-dihydrouridine synthase A, putative [Ricinus communis]	"catalytic activity"	-	-
Ai02g20951	p3	(TAA)10	30	1356	1385	PREDICTED: secologanin synthase-like [Vitis vinifera]	"monooxygenase activity"	"Fatty acid metabolism"	"Secologaninsynthase."
Ai02g20955	p3	(TGC)5	15	536	550	conserved hypothetical protein [Ricinus communis] gb|EEF30663.1| conserved hypothetical protein [Ricinus communis]	-	-	-
Ai02g20981	p3	(CCT)6	18	199	216	leucine-rich repeat family protein [Citrus trifoliata]	"biological_process"	"Plant-pathogen interaction"	"Non-specificserine/threonineproteinkinase."
Ai02g21004	p3	(AGC)6	18	40	57	Sulfate/thiosulfate import ATP-binding protein cysA [Theobroma cacao]	-	-	-
Ai02g21007	p3	(TAA)5	15	2379	2393	Uncharacterized protein TCM_005745 [Theobroma cacao]	"biological_process"	-	-
Ai02g21029	p3	(AGA)5	15	66	80	-	-	-	-
Ai02g21036	p3	(CTT)5	15	212	226	CCAAT-binding factor, putative isoform 1 [Theobroma cacao]	"nuclear membrane"	-	-
Ai02g21056	p3	(AAT)7	21	412	432	Uncharacterized protein TCM_017094 [Theobroma cacao]	-	-	-
Ai02g21067	p3	(TTC)7	21	83	103	NAD(P)-linked oxidoreductase superfamily protein [Theobroma cacao]	"cytoplasm"	-	-
Ai02g21138	p3	(AGT)5	15	16	30	hypothetical protein POPTR_0006s02970g [Populus trichocarpa]	"mediator complex"	-	-
Ai02g21172	p3	(TCA)6	18	565	582	MYB21, putative [Theobroma cacao]	"DNA binding"	-	-
Ai02g21209	p2	(CT)7	14	608	621	predicted protein [Populus trichocarpa]	"stamen development"	"Plant-pathogen interaction"	"Non-specificserine/threonineproteinkinase."
Ai02g21218	p3	(GCG)7	21	1313	1333	hypothetical protein PRUPE_ppa006373mg [Prunus persica]	"mitochondrial inner membrane"	-	-
Ai02g21221	p3	(AAT)8	24	721	744	WRKY transcription factor-like protein [Theobroma cacao]	"amino acid import"	"Plant-pathogen interaction"	-
Ai02g21222	c	(GAG)5(GAA)5	30	2173	2202	SWAP/surp domain-containing protein, putative isoform 1 [Theobroma cacao]	-	-	-
Ai02g21229	p3	(TGG)6	18	291	308	PREDICTED: CTD small phosphatase-like protein 2 isoform 1 [Vitis vinifera] emb|CBI25474.3| unnamed protein product [Vitis vinifera]	"phosphatase activity"	-	"Phosphoproteinphosphatase."
Ai02g21250	p1	(A)10	10	65	74	-	-	-	-
Ai02g21271	p1	(A)10	10	388	397	-	-	-	-
Ai02g21274	p2	(GA)6	12	997	1008	Cyclin/Brf1-like TBP-binding protein, putative isoform 1 [Theobroma cacao]	"positive regulation of transcription	-	-
Ai02g21318	p3	(AGC)6	18	1480	1497	hypothetical protein PRUPE_ppa006602mg [Prunus persica]	-	-	-
Ai02g21324	p3	(GAA)7	21	202	222	MORN repeat-containing protein isoform 1 [Theobroma cacao]	-	-	-
Ai02g21365	c	(CAA)5catgcatccaacttcttgaacctacc(ACA)5	56	37	92	Teosinte branched 1 [Theobroma cacao]	"DNA binding"	-	-
Ai02g21365	p3	(CAG)5	15	889	903	Teosinte branched 1 [Theobroma cacao]	"DNA binding"	-	-
Ai02g21366	p3	(ACA)6	18	1246	1263	amino acid binding protein, putative [Ricinus communis] gb|EEF49405.1| amino acid binding protein, putative [Ricinus communis]	"[protein-PII] uridylyltransferase activity"	-	"[Protein-PII]uridylyltransferase."
Ai02g21368	p3	(CAG)6	18	2938	2955	GYF domain-containing-like protein isoform 3 [Theobroma cacao]	-	-	-
Ai02g21444	p3	(TGA)6	18	213	230	hypothetical protein RCOM_1342140 [Ricinus communis] gb|EEF47136.1| hypothetical protein RCOM_1342140 [Ricinus communis]	-	-	-
Ai02g21447	p3	(GAA)5	15	24	38	predicted protein [Populus trichocarpa] gb|EEE98563.1| hypothetical protein POPTR_0014s10580g [Populus trichocarpa] gb|ERP53210.1| hypothetical protein POPTR_0014s10580g [Populus trichocarpa] gb|ERP53211.1| hypothetical protein POPTR_0014s10580g [Populus trichocarpa]	-	-	-
Ai02g21456	p3	(ATG)6	18	632	649	Forms aploid and binucleate cells 1a, putative [Theobroma cacao]	"phosphatidylinositol phosphorylation"	"Phosphatidylinositol signaling system"	"1-phosphatidylinositol-3-phosphate5-kinase."
Ai02g21459	p3	(TGA)6	18	381	398	hypothetical protein POPTR_0005s09300g [Populus trichocarpa]	"protein autoubiquitination"	-	-
Ai02g21493	p3	(AAG)6	18	16	33	Uncharacterized protein TCM_031863 [Theobroma cacao]	-	-	-
Ai02g21502	c	(GCA)5gagactaaggcaacaacagcagattctacagtccatgccaccattacagagagcccagttgcaa(CAG)8	103	168	270	Transcriptional corepressor SEUSS, putative [Ricinus communis] gb|EEF51439.1| Transcriptional corepressor SEUSS, putative [Ricinus communis]	"flower development"	-	-
Ai02g21524	p3	(TAA)8	24	381	404	NAC transcription factor 061 [Jatropha curcas]	"leaf senescence"	-	-
Ai02g21541	p3	(CTT)10	30	322	351	Uncharacterized protein isoform 1 [Theobroma cacao]	-	-	-
Ai02g21576	p3	(AGC)5	15	1658	1672	protein binding protein, putative [Ricinus communis] gb|EEF43859.1| protein binding protein, putative [Ricinus communis]	"receptor binding"	-	-
Ai02g21579	p3	(ATG)6	18	398	415	hypothetical protein RCOM_0904330 [Ricinus communis] gb|EEF43862.1| hypothetical protein RCOM_0904330 [Ricinus communis]	-	-	-
Ai02g21599	p3	(ACG)5	15	179	193	TCP family transcription factor, putative [Theobroma cacao]	"DNA endoreduplication"	-	-
Ai02g21602	p3	(TTC)5	15	711	725	hypothetical protein POPTR_0014s04610g [Populus trichocarpa]	"jasmonic acid mediated signaling pathway"	"Plant hormone signal transduction"	-
Ai02g21656	p3	(ATG)11	33	101	133	-	-	-	-
Ai02g21691	p3	(AGG)5	15	132	146	Uncharacterized protein TCM_028280 [Theobroma cacao]	"biological_process"	-	-
Ai02g21704	p3	(TGA)5	15	1038	1052	hypothetical protein MTR_5g021150 [Medicago truncatula] gb|AES95046.1| hypothetical protein MTR_5g021150 [Medicago truncatula]	"ATP binding"	-	-
Ai02g21706	p3	(TCT)6	18	3766	3783	hypothetical protein PRUPE_ppa000381mg [Prunus persica]	"heme oxidation"	"Mineral absorption"	-
Ai02g21725	p2	(AG)6	12	631	642	cytochrome P450 [Citrus sinensis]	"monooxygenase activity"	"Limonene and pinene degradation"	"4-hydroxyphenylacetaldehydeoximemonooxygenase."
Ai02g21744	p3	(TCC)7	21	53	73	predicted protein [Populus trichocarpa] gb|ERP60107.1| invertase/pectin methylesterase inhibitor family protein [Populus trichocarpa]	-	-	-
Ai02g21754	p3	(GAG)5	15	1225	1239	PREDICTED: mechanosensitive ion channel protein 8-like [Cucumis sativus]	"ion channel activity"	-	-
Ai02g21815	p3	(ACC)8	24	383	406	predicted protein [Populus trichocarpa] gb|EEE98009.1| WRKY transcription factor 65 family protein [Populus trichocarpa]	"transition metal ion transport"	"Plant-pathogen interaction"	-
Ai02g21818	c	(TCA)10(ACA)5	45	546	590	hypothetical protein PRUPE_ppa026376mg [Prunus persica]	"DNA binding"	-	-
Ai02g21819	p3	(GCA)5	15	264	278	PREDICTED: B2 protein [Vitis vinifera] emb|CBI16975.3| unnamed protein product [Vitis vinifera]	-	-	-
Ai02g21823	p3	(CCT)5	15	2056	2070	Asparagine synthase family protein, putative [Theobroma cacao]	"metabolic process"	-	-
Ai02g21833	p2	(AG)6	12	1287	1298	Phototropin 2 isoform 2 [Theobroma cacao]	"stomatal movement"	"Chronic myeloid leukemia"	"Non-specificserine/threonineproteinkinase."
Ai02g21845	p3	(CAA)6	18	198	215	beta-fructofuranosidase [Citrus sinensis]	"cellular modified amino acid biosynthetic process"	"Galactose metabolism"	"Beta-fructofuranosidase."
Ai02g21918	p3	(GCT)6	18	616	633	hypothetical protein POPTR_0019s10910g [Populus trichocarpa]	"calcium ion binding"	-	-
Ai02g21930	p3	(TGG)5	15	1581	1595	Mamallian P58IPK isoform 1 [Theobroma cacao]	"cytoplasm"	"Protein processing in endoplasmic reticulum"	-
Ai02g21931	p3	(ATC)7	21	464	484	Duplicated homeodomain-like superfamily protein [Arabidopsis thaliana] gb|AAG51144.1|AC079283_1 GT-like trihelix DNA-binding protein, putative [Arabidopsis thaliana] gb|AEE35898.1| Duplicated homeodomain-like superfamily protein [Arabidopsis thaliana]	"regulation of stomatal complex patterning"	-	-
Ai02g21931	p3	(ACC)5	15	1170	1184	Duplicated homeodomain-like superfamily protein [Arabidopsis thaliana] gb|AAG51144.1|AC079283_1 GT-like trihelix DNA-binding protein, putative [Arabidopsis thaliana] gb|AEE35898.1| Duplicated homeodomain-like superfamily protein [Arabidopsis thaliana]	"regulation of stomatal complex patterning"	-	-
Ai02g21991	p3	(TCG)5	15	10	24	Encodes alpha-helical IF-like protein isoform 1 [Theobroma cacao]	-	-	-
Ai02g22046	p3	(CTC)5	15	352	366	-	-	-	-
Ai02g22076	p3	(TTC)5	15	177	191	conserved hypothetical protein [Ricinus communis] gb|EEF36605.1| conserved hypothetical protein [Ricinus communis]	-	-	-
Ai02g22096	p3	(GGT)7	21	67	87	FRS (FAR1 Related Sequences) transcription factor family [Theobroma cacao]	"RNA processing"	-	-
Ai02g22207	p3	(ATG)7	21	3335	3355	PREDICTED: uncharacterized protein LOC100265170 [Vitis vinifera] emb|CBI21238.3| unnamed protein product [Vitis vinifera]	-	-	-
Ai02g22208	p3	(CTA)5	15	185	199	QUARTET 3 family protein [Populus trichocarpa]	"polygalacturonase activity"	-	"Polygalacturonase."
Ai02g22212	p3	(CAG)7	21	1255	1275	NHL domain-containing protein isoform 2 [Theobroma cacao]	-	-	-
Ai02g22214	p3	(CTG)5	15	2021	2035	PREDICTED: AP-1 complex subunit gamma-2 [Vitis vinifera] emb|CBI32122.3| unnamed protein product [Vitis vinifera]	"protein transport"	"Endocytosis"	-
Ai02g22223	p3	(GAA)7	21	46	66	PREDICTED: heparan-alpha-glucosaminide N-acetyltransferase-like isoform X3 [Setaria italica]	-	-	-
Ai02g22246	p3	(ACA)9	27	13	39	predicted protein [Populus trichocarpa]	"purine base transmembrane transporter activity"	-	-
Ai02g22246	p3	(ATA)9	27	1112	1138	predicted protein [Populus trichocarpa]	"purine base transmembrane transporter activity"	-	-
Ai02g22257	p3	(AGA)5	15	2007	2021	16S rRNA processing protein RimM family, putative isoform 1 [Theobroma cacao]	"structural constituent of ribosome"	"Ribosome"	-
Ai02g22258	p3	(AGA)6	18	261	278	-	-	-	-
Ai02g22262	p3	(GGA)6	18	55	72	P-glycoprotein 9 isoform 1 [Theobroma cacao] gb|EOY27831.1| P-glycoprotein 9 isoform 1 [Theobroma cacao] gb|EOY27832.1| P-glycoprotein 9 isoform 1 [Theobroma cacao] gb|EOY27833.1| P-glycoprotein 9 isoform 1 [Theobroma cacao] gb|EOY27834.1| P-glycoprotein 9 isoform 1 [Theobroma cacao] gb|EOY27835.1| P-glycoprotein 9 isoform 1 [Theobroma cacao] gb|EOY27836.1| P-glycoprotein 9 isoform 1 [Theobroma c…	"stamen development"	"ABC transporters"	"Xenobiotic-transportingATPase."
Ai02g22272	p3	(CAG)5	15	977	991	predicted protein [Populus trichocarpa]	"nucleoplasm"	"RNA transport"	-
Ai02g22310	p3	(CAT)7	21	938	958	Uncharacterized protein TCM_015688 [Theobroma cacao]	-	-	-
Ai02g22327	p3	(TAA)5	15	378	392	PREDICTED: U-box domain-containing protein 62-like [Vitis vinifera]	"protein ubiquitination"	-	-
Ai02g22342	p3	(GAT)5	15	688	702	hypothetical protein VITISV_035756 [Vitis vinifera]	"protein kinase activity"	"Plant-pathogen interaction"	"Non-specificserine/threonineproteinkinase."
Ai02g22400	p3	(GAT)9	27	307	333	Ubiquitin-conjugating enzyme 23 isoform 2 [Theobroma cacao] gb|EOX97624.1| Ubiquitin-conjugating enzyme 23 isoform 2 [Theobroma cacao] gb|EOX97625.1| Ubiquitin-conjugating enzyme 23 isoform 2 [Theobroma cacao]	"ATP binding"	"Ubiquitin mediated proteolysis"	"Ubiquitin--proteinligase."
Ai02g22406	p3	(CCA)5	15	1267	1281	diacylglycerol kinase, theta, putative [Ricinus communis] gb|EEF47790.1| diacylglycerol kinase, theta, putative [Ricinus communis]	"protein kinase C-activating G-protein coupled receptor signaling pathway"	"Phosphatidylinositol signaling system"	"Diacylglycerolkinase."
Ai02g22437	p3	(CAT)5	15	764	778	Hydroxyproline-rich glycoprotein family protein [Theobroma cacao]	-	-	-
Ai02g22462	p3	(ACA)5	15	44	58	unnamed protein product [Vitis vinifera]	"RNA splicing"	"Spliceosome"	"Non-specificserine/threonineproteinkinase."
Ai02g22485	p3	(CCT)5	15	67	81	-	-	-	-
Ai02g22517	p3	(GGT)5	15	388	402	hypothetical protein PRUPE_ppa006202mg [Prunus persica]	"DNA binding"	-	-
Ai02g22548	p3	(TCC)8	24	126	149	-	-	-	-
Ai02g22565	p1	(T)10	10	29	38	Kinase [Theobroma cacao]	"protein kinase activity"	"Plant-pathogen interaction"	"Non-specificserine/threonineproteinkinase."
Ai02g22581	p3	(CTT)8	24	5	28	PREDICTED: TMV resistance protein N-like [Vitis vinifera]	"callose deposition in cell wall"	-	-
Ai02g22598	p3	(TAA)5	15	849	863	hypothetical protein POPTR_0001s23640g [Populus trichocarpa]	-	-	-
Ai02g22617	p2	(AG)7	14	1401	1414	PREDICTED: uncharacterized protein RSN1-like [Fragaria vesca subsp. vesca]	"fungal-type vacuole membrane"	-	-
Ai02g22634	p3	(CTT)6	18	188	205	uncharacterized protein LOC100305561 [Glycine max] gb|ACU13305.1| unknown [Glycine max]	-	-	-
Ai02g22645	p3	(CTC)6	18	221	238	Uncharacterized protein TCM_019641 [Theobroma cacao]	"blood coagulation"	-	-
Ai02g22645	p5	(GAAAG)5	25	2091	2115	Uncharacterized protein TCM_019641 [Theobroma cacao]	"blood coagulation"	-	-
Ai02g22664	p2	(TC)6	12	1260	1271	hypothetical protein PRUPE_ppa015860mg [Prunus persica]	"negative regulation of gibberellic acid mediated signaling pathway"	"Plant hormone signal transduction"	-
Ai02g22668	p3	(AGA)6	18	666	683	PAPA-1-like family protein / zinc finger family protein, putative isoform 1 [Theobroma cacao]	-	-	-
Ai02g22677	p2	(AG)6	12	1154	1165	DNA binding,ATP binding,nucleic acid bindin isoform 5 [Theobroma cacao]	"DNA binding"	-	-
Ai02g22690	p3	(GAT)11	33	826	858	Uncharacterized protein TCM_006464 [Theobroma cacao]	-	-	-
Ai02g22704	p3	(GAA)8	24	3086	3109	Ribosomal protein S5/Elongation factor G/III/V family protein [Theobroma cacao]	"cytoplasm"	"Spliceosome"	"Elongationfactor4."
Ai02g22713	p3	(AAG)5	15	514	528	hypothetical protein MTR_3g104620 [Medicago truncatula] gb|AES73419.1| hypothetical protein MTR_3g104620 [Medicago truncatula]	-	-	-
Ai02g22713	p3	(AAC)8	24	830	853	hypothetical protein MTR_3g104620 [Medicago truncatula] gb|AES73419.1| hypothetical protein MTR_3g104620 [Medicago truncatula]	-	-	-
Ai02g22739	p3	(GAA)5	15	1993	2007	Zinc finger family protein / RNA recognition motif-containing protein, putative [Theobroma cacao]	"DNA binding"	-	-
Ai02g22752	p2	(AT)7	14	1	14	phenylcoumaran benzylic ether reductase -like protein [Populus trichocarpa]	"phenylpropanoid biosynthetic process"	"Propanoate metabolism"	"2{prime}-hydroxyisoflavonereductase."
Ai02g22756	p3	(AAC)6	18	250	267	Heavy metal transport/detoxification superfamily protein isoform 1 [Theobroma cacao] gb|EOY00916.1| Heavy metal transport/detoxification superfamily protein isoform 1 [Theobroma cacao] gb|EOY00917.1| Heavy metal transport/detoxification superfamily protein isoform 1 [Theobroma cacao] gb|EOY00918.1| Heavy metal transport/detoxification superfamily protein isoform 1 [Theobroma cacao]	-	-	-
Ai02g22763	p3	(ATG)5	15	1943	1957	Magnesium and cobalt efflux protein corC, putative [Ricinus communis] gb|EEF29344.1| Magnesium and cobalt efflux protein corC, putative [Ricinus communis]	"biological_process"	-	-
Ai02g22804	p3	(CTA)9	27	531	557	DNA binding protein, putative [Ricinus communis] gb|EEF35073.1| DNA binding protein, putative [Ricinus communis]	-	-	-
Ai02g22822	c	(GAA)5(GAT)5	30	388	417	predicted protein [Populus trichocarpa]	"DNA binding"	-	-
Ai02g22836	p3	(CTT)5	15	2171	2185	Cellulose synthase like E1 [Theobroma cacao]	"cellulose biosynthetic process"	-	"Cellulosesynthase(UDP-forming)."
Ai02g22837	p3	(TGC)6	18	15	32	Cellulose synthase like E1 isoform 1 [Theobroma cacao]	"cellulose biosynthetic process"	-	"Cellulosesynthase(UDP-forming)."
Ai02g22848	p1	(T)13	13	1248	1260	Ankyrin repeat family protein, putative [Theobroma cacao]	-	-	-
Ai02g22864	p3	(CAG)5	15	44	58	conserved hypothetical protein [Ricinus communis] gb|EEF39687.1| conserved hypothetical protein [Ricinus communis]	-	-	-
Ai02g22867	p6	(TAGCCC)5	30	843	872	Zinc-finger protein 10, putative [Theobroma cacao]	"intracellular"	-	-
Ai02g22878	p3	(ACT)5	15	415	429	predicted protein [Populus trichocarpa] gb|EEE94470.1| putative MYB transcription factor family protein [Populus trichocarpa]	"response to salicylic acid stimulus"	-	-
Ai02g22885	p3	(GCA)5	15	3	17	DNA-directed RNA polymerase [Theobroma cacao]	"cytoplasm"	"RNA polymerase"	"DNA-directedRNApolymerase."
Ai02g22901	p3	(GAT)7	21	403	423	PREDICTED: uncharacterized protein LOC100267731 [Vitis vinifera]	"meiotic DNA repair synthesis"	"Homologous recombination"	"DNAhelicase."
Ai02g22929	p3	(CTT)5	15	275	289	Oxidative stress 3, putative isoform 1 [Theobroma cacao]	-	-	-
Ai02g22969	p3	(ACT)5	15	109	123	Calcium-binding EF-hand family protein, putative [Theobroma cacao]	"biological_process"	"Plant-pathogen interaction"	"Non-specificserine/threonineproteinkinase."
Ai02g22980	p2	(CT)6	12	131	142	Domain of Uncharacterized protein function (DUF23), putative [Theobroma cacao]	"integral to membrane"	-	-
Ai02g22982	p6	(CAACCG)5	30	796	825	DNA-binding bromodomain-containing protein, putative [Theobroma cacao]	"blood coagulation"	-	-
Ai02g22990	p4	(TTCT)8	32	1758	1789	Calcium ion binding protein, putative isoform 1 [Theobroma cacao]	-	-	-
Ai02g22993	p2	(AG)6	12	619	630	ARM repeat superfamily protein [Theobroma cacao]	"leaf senescence"	-	-
Ai02g22996	p3	(CGC)7	21	1160	1180	Phosphatase 2C family protein isoform 1 [Theobroma cacao]	"cytoplasm"	"MAPK signaling pathway"	"Phosphoproteinphosphatase."
Ai02g23010	p3	(GAA)9	27	430	456	predicted protein [Populus trichocarpa]	"carbohydrate metabolic process"	-	"6-phospho-3-hexuloisomerase."
Ai02g23023	p3	(TGA)5	15	756	770	Uncharacterized protein TCM_021933 [Theobroma cacao]	-	-	-
Ai02g23042	p3	(CAA)7	21	451	471	unnamed protein product [Vitis vinifera]	"production of ta-siRNAs involved in RNA interference"	"Ether lipid metabolism"	"Non-specificserine/threonineproteinkinase."
Ai02g23042	p3	(CAG)6	18	577	594	unnamed protein product [Vitis vinifera]	"production of ta-siRNAs involved in RNA interference"	"Ether lipid metabolism"	"Non-specificserine/threonineproteinkinase."
Ai02g23042	p3	(CAG)5	15	1345	1359	unnamed protein product [Vitis vinifera]	"production of ta-siRNAs involved in RNA interference"	"Ether lipid metabolism"	"Non-specificserine/threonineproteinkinase."
Ai02g23053	p3	(TTC)5	15	90	104	Cytochrome P450 94A2 [Theobroma cacao]	"monooxygenase activity"	"Fatty acid metabolism"	"Cholesterol24-hydroxylase."
Ai02g23056	p3	(GAT)5	15	295	309	PREDICTED: uncharacterized protein LOC100247416 [Vitis vinifera] emb|CAN75279.1| hypothetical protein VITISV_030868 [Vitis vinifera] emb|CBI15652.3| unnamed protein product [Vitis vinifera]	"plasma membrane"	-	-
Ai02g23099	p3	(TTC)5	15	12	26	-	-	-	-
Ai02g23111	p3	(TCA)5	15	60	74	Heptahelical transmembrane protein1 isoform 1 [Theobroma cacao]	"integral to membrane"	"Adipocytokine signaling pathway"	-
Ai02g23115	p3	(GCA)6	18	1500	1517	hypothetical protein PRUPE_ppa003855mg [Prunus persica]	"clathrin binding"	-	-
Ai02g23117	p3	(CCA)6	18	92	109	conserved hypothetical protein [Ricinus communis] gb|EEF30430.1| conserved hypothetical protein [Ricinus communis]	-	-	-
Ai02g23124	p3	(CTG)5	15	569	583	Sensory transduction histidine kinase, putative isoform 1 [Theobroma cacao]	"DNA binding"	"Circadian rhythm - plant"	-
Ai02g23125	p3	(GAA)6	18	121	138	unnamed protein product [Vitis vinifera]	"L-glutamine transmembrane transporter activity"	-	-
Ai02g23132	p6	(AGAGGC)5	30	1105	1134	Uncharacterized protein TCM_008615 [Theobroma cacao]	-	-	-
Ai02g23150	p3	(ATG)5	15	662	676	Smr domain-containing protein, putative [Theobroma cacao]	-	-	-
Ai02g23151	p3	(GAA)5	15	106	120	hypothetical protein POPTR_0001s25870g [Populus trichocarpa]	"biological_process"	-	-
Ai02g23166	p3	(AGA)5	15	256	270	predicted protein [Populus trichocarpa]	-	-	-
Ai02g23242	p3	(AAT)6	18	430	447	homeobox protein knotted-1, putative [Ricinus communis] gb|EEF46914.1| homeobox protein knotted-1, putative [Ricinus communis]	"cellular response to cytokine stimulus"	-	-
Ai02g23254	p3	(ATG)5	15	1	15	-	-	-	-
Ai02g23278	p3	(AGC)5	15	150	164	-	-	-	-
Ai02g23322	p3	(CAC)5	15	382	396	-	-	-	-
Ai02g23328	p3	(TCT)8	24	16	39	conserved hypothetical protein [Ricinus communis] gb|EEF41500.1| conserved hypothetical protein [Ricinus communis]	-	-	-
Ai02g23336	p3	(GAA)7	21	414	434	PREDICTED: uncharacterized protein LOC100249711 [Vitis vinifera] emb|CBI35945.3| unnamed protein product [Vitis vinifera]	-	-	-
Ai02g23337	p1	(A)10	10	37	46	Glyoxylate reductase 2 isoform 1 [Theobroma cacao]	"pentose-phosphate shunt"	"Pentose phosphate pathway"	"2-hydroxy-3-oxopropionatereductase."
Ai02g23340	p3	(AAG)7	21	746	766	SMAD/FHA domain-containing protein, putative [Theobroma cacao]	-	-	-
Ai02g23352	p3	(TTC)5	15	308	322	-	-	-	-
Ai02g23457	p3	(CAG)5	15	354	368	-	-	-	-
Ai02g23459	p3	(GAG)5	15	172	186	suppressor of ty, putative [Ricinus communis] gb|EEF36249.1| suppressor of ty, putative [Ricinus communis]	"structural constituent of ribosome"	-	-
Ai02g23467	p3	(GGA)5	15	109	123	-	-	-	-
Ai02g23480	p3	(TCG)6	18	151	168	hypothetical protein PRUPE_ppa008460mg [Prunus persica]	-	-	-
Ai02g23482	p2	(AT)8	16	1354	1369	glutamate-gated kainate-type ion channel receptor subunit GluR5 [Populus trichocarpa]	"outer membrane-bounded periplasmic space"	-	-
Ai02g23502	p3	(ATA)5	15	413	427	unnamed protein product [Vitis vinifera]	"cellular metabolic process"	"Phenylpropanoid biosynthesis"	"Dihydrokaempferol4-reductase."
Ai02g23503	p3	(CAG)6	18	244	261	Duplicated homeodomain-like superfamily protein, putative [Theobroma cacao]	"DNA binding"	-	-
Ai02g23589	p3	(CAG)5	15	109	123	SCL6 [Citrus trifoliata]	"root hair cell tip growth"	"Plant hormone signal transduction"	-
Ai02g23591	p3	(TGA)5	15	459	473	Calmodulin-related, putative isoform 1 [Theobroma cacao]	-	-	-
Ai02g23598	p3	(CAT)5	15	410	424	Acyl-CoA sterol acyl transferase 1, putative [Theobroma cacao]	"biological_process"	-	"Long-chain-alcoholO-fatty-acyltransferase."
Ai02g23605	p3	(CAA)6	18	102	119	SET domain protein 2 isoform 1 [Theobroma cacao]	"stamen development"	"Lysine degradation"	"Histone-lysineN-methyltransferase."
Ai02g23647	p3	(ATC)12	36	917	952	NAD(P)-linked oxidoreductase superfamily protein [Theobroma cacao]	"NADP+ binding"	"Glycolysis / Gluconeogenesis"	"Alcoholdehydrogenase(NADP(+))."
Ai02g23648	p3	(TCA)11	33	135	167	-	-	-	-
Ai02g23652	p3	(CAG)5	15	622	636	SEUSS transcriptional co-regulator isoform 1 [Theobroma cacao]	"flower development"	-	-
Ai02g23666	p3	(ACC)5	15	116	130	Uncharacterized protein TCM_005849 [Theobroma cacao]	-	-	-
Ai02g23687	p2	(AG)6	12	66	77	Peroxisome biogenesis protein 1 [Theobroma cacao]	"cytoplasm"	"Protein processing in endoplasmic reticulum"	-
Ai02g23703	p3	(GAA)6	18	301	318	-	-	-	-
Ai02g23703	p3	(AGA)6	18	434	451	-	-	-	-
Ai02g23715	p3	(GAA)7	21	427	447	Receptor-type tyrosine-protein phosphatase U [Theobroma cacao]	-	-	-
Ai02g23757	p2	(CT)7	14	218	231	PREDICTED: nuclear transcription factor Y subunit A-7 isoform 1 [Vitis vinifera] emb|CBI30998.3| unnamed protein product [Vitis vinifera]	"DNA binding"	"Antigen processing and presentation"	-
Ai02g23762	p3	(GGA)5	15	14352	14366	hypothetical protein PRUPE_ppa000002mg [Prunus persica]	"visual perception"	-	-
Ai02g23779	p1	(A)10	10	647	656	hypothetical protein POPTR_0015s03400g [Populus trichocarpa]	-	-	-
Ai02g23798	p3	(TCC)5	15	13	27	-	-	-	-
Ai02g23798	p3	(GCT)5	15	238	252	-	-	-	-
Ai02g23809	p3	(AGA)5	15	782	796	PREDICTED: histidyl-tRNA synthetase-like [Vitis vinifera]	"cytoplasm"	"Hepatitis C"	"Histidine--tRNAligase."
Ai02g23853	p2	(TC)6	12	205	216	unknown [Populus trichocarpa]	"cytoplasm"	"Arginine and proline metabolism"	"Aminoacylase."
Ai02g23875	p3	(TGA)6	18	207	224	-	-	-	-
Ai02g23890	p3	(GAA)7	21	4	24	T20M3.5 protein, putative [Theobroma cacao]	-	-	-
Ai02g23898	c	(ATC)6aacagcagcagcaaccacaacaacagcagcagcatcagattcaagtgcaagtacaag(ATC)5	90	116	205	BZIP transcription factor family protein [Theobroma cacao]	"cytoplasm"	"Plant hormone signal transduction"	-
Ai02g23919	p3	(AGG)7	21	585	605	-	-	-	-
Ai02g23925	p3	(AGC)6	18	307	324	protein with unknown function [Ricinus communis] gb|EEF34841.1| protein with unknown function [Ricinus communis]	-	-	-
Ai02g23966	p3	(AAG)5	15	127	141	-	-	-	-
Ai02g23984	p3	(CAG)7	21	2644	2664	PERQ amino acid-rich with GYF domain-containing protein 1, putative [Theobroma cacao]	-	-	-
Ai02g23986	p3	(GAG)7	21	94	114	NAC transcription factor 051 [Jatropha curcas]	-	-	-
Ai02g24024	p3	(CCA)7	21	23	43	-	-	-	-
Ai02g24046	p3	(ATC)7	21	326	346	Lateral root primordium protein-related isoform 3, partial [Theobroma cacao]	-	-	-
Ai02g24057	p3	(GAA)5	15	246	260	Uncharacterized protein TCM_000126 [Theobroma cacao]	-	-	-
Ai02g24071	p3	(TCT)8	24	43	66	Haloacid dehalogenase-like hydrolase superfamily protein isoform 1 [Theobroma cacao]	"metabolic process"	-	-
Ai02g24103	p3	(TCT)6	18	163	180	Uncharacterized protein TCM_041386 [Theobroma cacao]	-	-	-
Ai02g24103	c	(AAG)7attatagt(GAA)7	50	845	894	Uncharacterized protein TCM_041386 [Theobroma cacao]	-	-	-
Ai02g24116	p1	(A)10	10	1378	1387	Alpha/beta-Hydrolases superfamily protein [Theobroma cacao]	"1-acyl-2-lysophosphatidylserine acylhydrolase activity"	"alpha-Linolenic acid metabolism"	"PhospholipaseA(1)."
Ai02g24158	c	(CAT)5caactgctgcagcaaagcttgttagcaacggcaaggtttcagacaagctggaggctctgaaaaacctaattcccggaagccattttaatggaag(AGA)5	124	167	290	-	-	-	-
Ai02g24172	p3	(CTT)6	18	52	69	PREDICTED: 2-methylbutanal oxime monooxygenase-like [Vitis vinifera]	"monooxygenase activity"	"Limonene and pinene degradation"	"4-hydroxyphenylacetaldehydeoximemonooxygenase."
Ai02g24193	c	(TGG)6(TAG)7	39	1008	1046	SWIB complex BAF60b domain-containing protein, putative [Theobroma cacao]	-	-	-
Ai02g24237	p3	(GAA)5	15	160	174	hypothetical protein PRUPE_ppa020151mg [Prunus persica]	"protein autoubiquitination"	-	-
Ai02g24243	p3	(ATC)5	15	840	854	Eukaryotic aspartyl protease family protein [Theobroma cacao]	"peptidase activity"	-	"Nepenthesin."
Ai02g24265	p3	(TTC)9	27	261	287	PREDICTED: sodium transporter HKT1-like isoform X2 [Cicer arietinum]	"transport"	-	-
Ai02g24290	p3	(CTT)5	15	128	142	Coiled-coil domain-containing protein 109A isoform 2 [Theobroma cacao]	-	-	-
Ai02g24290	p3	(TTC)5	15	249	263	Coiled-coil domain-containing protein 109A isoform 2 [Theobroma cacao]	-	-	-
Ai02g24298	p3	(GTA)5	15	374	388	PREDICTED: uncharacterized protein LOC100267173 [Vitis vinifera]	-	-	-
Ai02g24305	p3	(AAC)6	18	112	129	PSI reaction center subunit III [Citrus sinensis]	"photosystem I reaction center"	"Photosynthesis"	-
Ai02g24329	p3	(AAG)6	18	313	330	DEAD-box ATP-dependent RNA helicase 39 isoform 1 [Theobroma cacao] gb|EOY16881.1| DEAD-box ATP-dependent RNA helicase 39 isoform 1 [Theobroma cacao]	"rRNA processing"	"Spliceosome"	"RNAhelicase."
Ai02g24340	p1	(A)10	10	311	320	-	-	-	-
Ai02g24372	p3	(AGC)5	15	1174	1188	Uncharacterized protein isoform 1 [Theobroma cacao] gb|EOY22003.1| Uncharacterized protein isoform 1 [Theobroma cacao]	-	-	-
Ai02g24378	p3	(GAG)5	15	700	714	RING-H2 finger protein ATL3B precursor, putative [Ricinus communis] gb|EEF34736.1| RING-H2 finger protein ATL3B precursor, putative [Ricinus communis]	"protein ubiquitination"	-	-
Ai02g24393	p3	(AGG)6	18	1139	1156	clathrin assembly protein, putative [Ricinus communis] gb|EEF34578.1| clathrin assembly protein, putative [Ricinus communis]	"clathrin binding"	-	-
Ai02g24410	p3	(GAC)5	15	274	288	hypothetical protein RCOM_0615680 [Ricinus communis] gb|EEF33962.1| hypothetical protein RCOM_0615680 [Ricinus communis]	-	-	-
Ai02g24423	p3	(GAA)5	15	397	411	predicted protein [Populus trichocarpa] gb|EEE79273.1| hypothetical protein POPTR_0003s07770g [Populus trichocarpa]	-	-	-
Ai02g24442	p3	(AAG)7	21	334	354	-	-	-	-
Ai02g24449	p3	(TCT)7	21	496	516	PREDICTED: probable FKBP-type peptidyl-prolyl cis-trans isomerase 4, chloroplastic [Vitis vinifera] emb|CBI21467.3| unnamed protein product [Vitis vinifera]	"chloroplast thylakoid lumen"	-	"Peptidylprolylisomerase."
Ai02g24464	p3	(AGC)8	24	204	227	PREDICTED: transcription factor bHLH95 [Vitis vinifera] emb|CAN74162.1| hypothetical protein VITISV_026442 [Vitis vinifera] emb|CBI32389.3| unnamed protein product [Vitis vinifera]	"embryo development"	-	-
Ai02g24502	p3	(CCT)5	15	85	99	Autophagy protein Apg5 family isoform 2 [Theobroma cacao]	"leaf senescence"	"RIG-I-like receptor signaling pathway"	-
Ai02g24507	p3	(CTT)8	24	36	59	SKU5 similar 3 [Theobroma cacao]	"root hair elongation"	-	"L-ascorbateoxidase."
Ai02g24510	c	(AAG)5agacatgatggnnnnnnnnnnnnnnnnnnnnnnnnnnnnnnnnnnnnnnnnnnnnnnnnnnnnnnnnnnnnnnnnnnnnnnnnnnnnnnnnn(AGA)11	140	271	410	hypothetical protein POPTR_0014s14730g [Populus trichocarpa]	-	-	-
Ai02g24539	c	(CTA)8g(TAC)6	43	1721	1763	PREDICTED: probable peptide/nitrate transporter At1g59740-like [Vitis vinifera]	"cellular cell wall macromolecule metabolic process"	"Protein digestion and absorption"	-
Ai02g24546	p3	(AAT)6	18	202	219	Uncharacterized protein isoform 1 [Theobroma cacao] gb|EOY30339.1| Uncharacterized protein isoform 1 [Theobroma cacao] gb|EOY30340.1| Uncharacterized protein isoform 1 [Theobroma cacao]	-	-	-
Ai02g24615	p3	(GGA)7	21	120	140	Kiwellin [Theobroma cacao]	"extracellular region"	-	-
Ai02g24620	p1	(A)11	11	19	29	Far-red impaired responsive family protein isoform 2 [Theobroma cacao]	"cellular_component"	-	-
Ai02g24626	p3	(GAA)5	15	295	309	unknown [Citrus yellow mosaic virus]	"peptidase activity"	-	"RNA-directedDNApolymerase."
Ai02g24666	p3	(CAA)5	15	118	132	-	-	-	-
Ai02g24682	p3	(CTT)6	18	134	151	Arginine/serine-rich coiled coil protein [Theobroma cacao]	-	-	-
Ai02g24692	p3	(CTG)5	15	833	847	hypothetical protein PRUPE_ppa012756mg [Prunus persica]	"cytoplasm"	"Spliceosome"	-
Ai02g24706	p3	(AAG)6	18	70	87	PREDICTED: eukaryotic translation initiation factor 2 subunit beta [Vitis vinifera]	"translation initiation factor activity"	"RNA transport"	-
Ai02g24707	p3	(AAG)6	18	331	348	unnamed protein product [Vitis vinifera]	"translation initiation factor activity"	"RNA transport"	-
Ai02g24761	p3	(GAT)6	18	58	75	PREDICTED: uncharacterized protein LOC100257808 [Vitis vinifera]	-	-	-
Ai02g24784	p3	(GGA)6	18	377	394	conserved hypothetical protein [Ricinus communis] gb|EEF28370.1| conserved hypothetical protein [Ricinus communis]	"gibberellin biosynthetic process"	-	-
Ai02g24793	p3	(GAA)7	21	120	140	PREDICTED: uncharacterized protein LOC100245724 [Vitis vinifera] emb|CBI15441.3| unnamed protein product [Vitis vinifera]	-	-	-
Ai02g24815	p3	(GAT)6	18	175	192	predicted protein [Populus trichocarpa] gb|EEE80857.1| DGCR14-related family protein [Populus trichocarpa]	"nervous system development"	-	-
Ai02g24840	p3	(TTC)5	15	114	128	hypothetical protein VITISV_000273 [Vitis vinifera]	-	-	-
Ai02g24918	p3	(TGC)5	15	507	521	hypothetical protein PRUPE_ppa019374mg [Prunus persica]	-	-	-
Ai02g24918	p3	(GAA)6	18	1090	1107	hypothetical protein PRUPE_ppa019374mg [Prunus persica]	-	-	-
Ai02g24938	c	(CTT)5attcctcagccagcatgattcctcaaaacaaataagatcttcttctactt(CTC)5	80	27	106	hypothetical protein POPTR_0182s00200g [Populus trichocarpa]	"cytoplasm"	-	-
Ai02g24962	p3	(GAC)5	15	877	891	Choline-phosphate cytidylyltransferase B [Theobroma cacao]	"cytoplasm"	"Phosphonate and phosphinate metabolism"	"Choline-phosphatecytidylyltransferase."
Ai02g24975	p3	(CAA)5	15	997	1011	NAC domain containing protein 75 isoform 4 [Theobroma cacao]	"DNA binding"	-	-
Ai02g24975	p3	(CAA)5	15	1189	1203	NAC domain containing protein 75 isoform 4 [Theobroma cacao]	"DNA binding"	-	-
Ai02g24983	p3	(CTA)6	18	69	86	-	-	-	-
Ai02g24984	p3	(CGC)5	15	172	186	RING-H2 finger protein ATL3, putative [Theobroma cacao]	"protein ubiquitination"	-	-
Ai02g25001	p3	(CAG)5	15	694	708	Abscisic acid responsive elements-binding factor 2 isoform 1 [Theobroma cacao] gb|EOY14439.1| Abscisic acid responsive elements-binding factor 2 isoform 1 [Theobroma cacao]	"glucose mediated signaling pathway"	"Plant hormone signal transduction"	-
Ai02g25025	p3	(TTC)5	15	90	104	PREDICTED: uncharacterized protein LOC100248935 [Vitis vinifera] emb|CBI25836.3| unnamed protein product [Vitis vinifera]	-	-	-
Ai02g25033	p3	(TGC)7	21	255	275	IQ-domain 1 [Theobroma cacao]	"calmodulin binding"	-	-
Ai02g25073	p3	(CTT)5	15	5	19	unnamed protein product [Vitis vinifera]	"cytoplasm"	-	-
Ai02g25073	p6	(GAGGAA)5	30	2167	2196	unnamed protein product [Vitis vinifera]	"cytoplasm"	-	-
Ai02g25080	p3	(TAA)5	15	469	483	hypothetical protein POPTR_0017s09550g [Populus trichocarpa]	-	-	-
Ai02g25089	p3	(ATT)5	15	626	640	hypothetical protein PRUPE_ppa008274mg [Prunus persica]	"cytoplasm"	"Spliceosome"	-
Ai02g25091	p3	(CAA)6	18	27	44	Integrase-type DNA-binding superfamily protein [Theobroma cacao]	"cellular cell wall macromolecule metabolic process"	-	-
Ai02g25129	p3	(ATC)6	18	843	860	unnamed protein product [Vitis vinifera]	"protein kinase activity"	"MAPK signaling pathway"	"Non-specificserine/threonineproteinkinase."
Ai02g25136	p3	(GAA)9	27	207	233	Uncharacterized protein isoform 1 [Theobroma cacao]	-	-	-
Ai02g25153	p3	(AGA)6	18	279	296	PREDICTED: protein TRANSPARENT TESTA 1 [Vitis vinifera]	"intracellular"	-	-
Ai02g25161	p3	(GAA)8	24	452	475	ATP binding protein, putative [Ricinus communis] gb|EEF43833.1| ATP binding protein, putative [Ricinus communis]	-	-	-
Ai02g25180	p3	(GAA)10	30	46	75	Ribonucleoside-diphosphate reductase small chain A isoform 1 [Theobroma cacao]	"cytoplasm"	"p53 signaling pathway"	"Ribonucleoside-diphosphatereductase."
Ai02g25186	p3	(TGA)5	15	291	305	hypothetical protein PRUPE_ppa003397mg [Prunus persica]	"histone deacetylase activity (H4-K16 specific)"	-	"Histonedeacetylase."
Ai02g25243	p3	(GAG)5	15	1	15	Uncharacterized protein isoform 1 [Theobroma cacao] gb|EOX97075.1| Uncharacterized protein isoform 1 [Theobroma cacao]	"nuclear membrane"	-	-
Ai02g25244	p3	(CAT)6	18	452	469	unnamed protein product [Vitis vinifera]	-	-	-
Ai02g25256	p3	(TGG)8	24	27	50	PREDICTED: metal tolerance protein 10-like [Glycine max]	"plasma membrane"	-	-
Ai02g25262	p3	(GAA)5	15	1431	1445	PREDICTED: DEAD-box ATP-dependent RNA helicase 36-like [Vitis vinifera] emb|CBI24175.3| unnamed protein product [Vitis vinifera]	"rRNA processing"	-	"RNAhelicase."
Ai02g25264	p3	(TAT)6	18	373	390	FTSH protease 12 isoform 1 [Theobroma cacao]	"peptidase activity"	-	"Microtubule-severingATPase."
Ai02g25273	p6	(AGCAAC)6	36	1756	1791	hypothetical protein POPTR_0003s17460g [Populus trichocarpa]	"ion channel activity"	-	"Acidphosphatase."
Ai02g25308	p3	(GAA)5	15	627	641	predicted protein [Populus trichocarpa] gb|EEE84303.1| hypothetical protein POPTR_0001s10200g [Populus trichocarpa]	-	-	-
Ai02g25321	p3	(GAA)5	15	420	434	Uncharacterized protein TCM_021236 [Theobroma cacao]	-	-	-
Ai02g25356	p3	(AGA)5	15	1212	1226	Fimbriata [Theobroma cacao]	"flower development"	-	-
Ai02g25374	p3	(TTC)10	30	358	387	Purple acid phosphatase 27 isoform 1 [Theobroma cacao]	"extracellular region"	-	"Acidphosphatase."
Ai02g25380	p3	(TTC)9	27	312	338	predicted protein [Populus trichocarpa] gb|EEE82576.1| elongation defective 1 family protein [Populus trichocarpa]	-	-	-
Ai02g25407	p3	(CTA)7	21	311	331	conserved hypothetical protein [Ricinus communis] gb|EEF35096.1| conserved hypothetical protein [Ricinus communis]	-	-	-
Ai02g25415	p3	(GAA)7	21	112	132	protein with unknown function [Ricinus communis] gb|EEF42398.1| protein with unknown function [Ricinus communis]	-	-	-
Ai02g25418	p3	(TCA)8	24	388	411	Uncharacterized protein isoform 1 [Theobroma cacao]	"protein kinase activity"	-	"Non-specificserine/threonineproteinkinase."
Ai02g25432	p3	(ATG)5	15	1217	1231	predicted protein [Populus trichocarpa] gb|EEE90765.1| hypothetical protein POPTR_0007s14450g [Populus trichocarpa]	-	-	-
Ai02g25445	p3	(CAC)6	18	580	597	acetyltransferase complex ard1 subunit, putative [Ricinus communis] gb|EEF44561.1| acetyltransferase complex ard1 subunit, putative [Ricinus communis]	"cytoplasm"	-	"Peptidealpha-N-acetyltransferase."
Ai02g25446	p3	(GAA)5	15	49	63	Plasma-membrane choline transporter family protein isoform 1 [Theobroma cacao]	"integral to membrane"	-	-
Ai02g25454	p3	(GCA)7	21	66	86	Pleckstrin domain-containing family N member 1 [Theobroma cacao]	-	-	-
Ai02g25454	p3	(AAG)6	18	475	492	Pleckstrin domain-containing family N member 1 [Theobroma cacao]	-	-	-
Ai02g25455	p3	(CCT)7	21	97	117	TLD-domain containing nucleolar protein, putative isoform 1 [Theobroma cacao]	"mitochondrion"	-	-
Ai02g25473	p3	(CAG)5	15	118	132	Teosinte branched 1, putative isoform 1 [Theobroma cacao] gb|EOY27652.1| Teosinte branched 1, putative isoform 1 [Theobroma cacao] gb|EOY27653.1| Teosinte branched 1, putative isoform 1 [Theobroma cacao] gb|EOY27655.1| Teosinte branched 1, putative isoform 1 [Theobroma cacao]	"plastid organization"	-	-
Ai02g25480	p3	(GCT)7	21	196	216	Photosystem II 5 kDa protein, chloroplast precursor, putative [Ricinus communis] gb|EEF48897.1| Photosystem II 5 kDa protein, chloroplast precursor, putative [Ricinus communis]	-	-	-
Ai02g25492	p3	(GAA)8	24	481	504	Uncharacterized protein TCM_041581 [Theobroma cacao]	-	-	-
Ai02g25542	p3	(GAA)6	18	636	653	Uncharacterized protein TCM_002454 [Theobroma cacao]	-	-	-
Ai02g25545	p3	(GAT)7	21	181	201	PREDICTED: uncharacterized protein LOC101216086 [Cucumis sativus] ref|XP_004171203.1| PREDICTED: uncharacterized LOC101216086 [Cucumis sativus]	-	-	-
Ai02g25592	p3	(ACG)5	15	26	40	Arginine methyltransferase 11 [Theobroma cacao]	"cytoplasm"	-	"Histone-arginineN-methyltransferase."
Ai02g25599	p1	(T)11	11	1509	1519	hypothetical protein POPTR_0013s01200g [Populus trichocarpa]	-	-	-
Ai02g25603	p3	(AGT)6	18	964	981	Uncharacterized protein isoform 1 [Theobroma cacao]	-	-	-
Ai02g25645	p3	(ATC)12	36	1071	1106	Glycosyl hydrolase superfamily protein isoform 1 [Theobroma cacao] gb|EOY33433.1| Glycosyl hydrolase superfamily protein isoform 1 [Theobroma cacao]	"cytoplasm"	-	"Glucanendo-1
Ai02g25670	p2	(GA)6	12	2134	2145	ATPase, AAA-type, CDC48 protein [Theobroma cacao]	"protein phosphatase binding"	"Protein processing in endoplasmic reticulum"	"Adenosinetriphosphatase."
Ai02g25700	p3	(GCA)7	21	74	94	O-fucosyltransferase family protein isoform 1 [Theobroma cacao]	-	-	-
Ai02g25711	p3	(GAA)6	18	51	68	Heavy metal transport/detoxification superfamily protein [Theobroma cacao]	"nuclear membrane"	-	-
Ai02g25713	p3	(GGA)5	15	217	231	predicted protein [Populus trichocarpa]	-	-	-
Ai02g25732	p3	(CAA)11	33	181	213	RPM1-interacting protein 4 (RIN4) family protein, putative [Theobroma cacao]	-	-	-
Ai02g25750	p3	(TCT)7	21	229	249	F-box family protein, putative isoform 1 [Theobroma cacao]	"DNA binding"	-	-
Ai02g25755	p3	(AGC)6	18	172	189	Basic helix-loop-helix DNA-binding superfamily protein, putative [Theobroma cacao]	-	-	-
Ai02g25808	p3	(GCA)7	21	1000	1020	predicted protein [Populus trichocarpa] gb|ERP50002.1| auxin response factor 2 family protein [Populus trichocarpa]	"DNA binding"	"Plant hormone signal transduction"	-
Ai02g25884	p1	(T)10	10	666	675	maternal effect embryo arrest 49-1 protein [Dimocarpus longan]	-	-	-
Ai02g25897	p6	(CAAGCT)6	36	103	138	Uncharacterized protein TCM_005803 [Theobroma cacao]	-	-	-
Ai02g25911	p3	(CAA)5	15	313	327	predicted protein [Populus trichocarpa] gb|EEE89353.1| hypothetical protein POPTR_0008s03240g [Populus trichocarpa]	-	-	-
Ai02g25924	p3	(CTG)5	15	372	386	AP-1 complex subunit gamma-2, putative [Ricinus communis] gb|EEF41443.1| AP-1 complex subunit gamma-2, putative [Ricinus communis]	"protein transport"	"Lysosome"	-
Ai02g25931	p3	(CAG)5	15	291	305	-	-	-	-
Ai02g25953	p3	(AGG)6	18	156	173	hypothetical protein PRUPE_ppa012690mg [Prunus persica]	-	-	-
Ai02g25961	p1	(A)13	13	193	205	PREDICTED: chitobiosyldiphosphodolichol beta-mannosyltransferase-like [Vitis vinifera]	-	-	-
Ai02g25971	p3	(GGA)6	18	521	538	-	-	-	-
Ai02g26021	p2	(CT)6	12	146	157	Domain of Uncharacterized protein function (DUF23), putative [Theobroma cacao]	-	-	-
Ai02g26030	p3	(CTC)5	15	70	84	hypothetical protein PRUPE_ppa002948mg [Prunus persica]	"Golgi stack"	-	-
Ai02g26064	p3	(AGG)7	21	785	805	hypothetical protein M569_12017, partial [Genlisea aurea]	-	-	-
Ai02g26091	p3	(GCT)7	21	868	888	Brassinosteroid-6-oxidase 2 [Theobroma cacao]	"monooxygenase activity"	"Brassinosteroid biosynthesis"	-
Ai02g26105	p3	(AGC)5	15	1244	1258	Uncharacterized protein isoform 1 [Theobroma cacao] gb|EOY22003.1| Uncharacterized protein isoform 1 [Theobroma cacao]	-	-	-
Ai02g26107	p3	(GCT)5	15	20	34	-	-	-	-
Ai02g26134	p6	(ATGCAC)5	30	429	458	hypothetical protein PRUPE_ppa004723mg [Prunus persica]	-	-	-
Ai02g26134	p3	(GAA)7	21	657	677	hypothetical protein PRUPE_ppa004723mg [Prunus persica]	-	-	-
Ai02g26219	p3	(TAA)7	21	1084	1104	Uncharacterized protein TCM_035147 [Theobroma cacao]	-	-	-
Ai02g26226	p3	(AGC)7	21	34	54	-	-	-	-
Ai02g26254	p3	(TTC)5	15	272	286	Growth-regulating factor 5 isoform 2 [Theobroma cacao]	-	-	-
Ai02g26264	p3	(GAA)5	15	90	104	hypothetical protein POPTR_0001s25870g [Populus trichocarpa]	"biological_process"	-	-
Ai02g26266	p3	(GAT)5	15	351	365	predicted protein [Populus trichocarpa]	-	-	-
Ai02g26347	p3	(GAT)5	15	1379	1393	serine carboxypeptidase, putative [Ricinus communis] gb|EEF37121.1| serine carboxypeptidase, putative [Ricinus communis]	"peptidase activity"	"Lysosome"	"Sinapoylglucose--cholineO-sinapoyltransferase."
Ai02g26369	p3	(AGC)5	15	495	509	hypothetical protein POPTR_0005s043601g, partial [Populus trichocarpa]	-	-	-
Ai02g26374	p1	(A)10	10	8	17	blue copper-binding protein-like [Arabidopsis thaliana]	-	-	-
Ai02g26422	p4	(TCGC)5	20	1	20	PREDICTED: uncharacterized protein LOC100266920 [Vitis vinifera]	-	-	-
Ai02g26446	p3	(AGA)6	18	808	825	predicted protein [Populus trichocarpa]	"protein glycosylation"	"Terpenoid backbone biosynthesis"	"diphosphatespecific)."
Ai02g26454	p2	(CT)9	18	223	240	geranyl pyrophosphate synthase [Solanum lycopersicum] gb|ABB88703.1| geranyl pyrophosphate synthase [Solanum lycopersicum]	-	-	-
Ai02g26468	p3	(AGA)13	39	1	39	hypothetical protein POPTR_0010s15930g [Populus trichocarpa]	"chloroplast outer membrane"	-	-
Ai02g26469	p3	(GCA)8	24	117	140	hypothetical protein PRUPE_ppa000033mg [Prunus persica]	-	-	-
Ai02g26473	p3	(GAT)9	27	1	27	FASCICLIN-like arabinogalactan-protein 11 [Theobroma cacao]	"plasma membrane"	-	-
Ai02g26525	p1	(T)10	10	612	621	unknown [Populus trichocarpa]	-	-	-
Ai02g26532	p6	(TGAAGC)5	30	243	272	-	-	-	-
Ai02g26561	p3	(TGG)6	18	1133	1150	predicted protein [Populus trichocarpa] gb|ERP60036.1| hypothetical protein POPTR_0005s00240g [Populus trichocarpa]	"ATP binding"	-	"RNAhelicase."
Ai02g26568	p1	(A)11	11	348	358	hypothetical protein POPTR_0017s11380g [Populus trichocarpa]	"metabolic process"	-	"Anthocyanin3{prime}-O-beta-glucosyltransferase."
Ai02g26588	p1	(T)12	12	119	130	hypothetical protein POPTR_0022s00470g [Populus trichocarpa] gb|ERP48422.1| hypothetical protein POPTR_0022s00470g [Populus trichocarpa] gb|ERP48423.1| hypothetical protein POPTR_0022s00470g [Populus trichocarpa] gb|ERP48425.1| amine oxidase family protein [Populus trichocarpa]	-	-	-
Ai02g26596	p3	(CTA)5	15	1044	1058	hypothetical protein PRUPE_ppa015032mg [Prunus persica]	"DNA binding"	-	-
Ai02g26658	p3	(GAT)6	18	741	758	predicted protein [Populus trichocarpa] gb|EEF04342.1| hypothetical protein POPTR_0016s02530g [Populus trichocarpa]	-	-	-
Ai02g26688	p3	(AGC)7	21	49	69	-	-	-	-
Ai02g26689	p3	(TGG)6	18	201	218	-	-	-	-
Ai02g26739	p3	(CAA)6	18	33	50	hypothetical protein POPTR_0009s14970g [Populus trichocarpa]	-	-	-
Ai02g26741	p6	(AGATGA)5	30	204	233	-	-	-	-
Ai02g26787	p3	(AGA)6	18	143	160	Basic helix-loop-helix DNA-binding superfamily protein isoform 4 [Theobroma cacao]	"DNA binding"	-	-
Ai02g26820	p2	(TC)10	20	160	179	COP1-interacting protein 7, putative isoform 2 [Theobroma cacao]	-	-	-
Ai02g26838	p3	(TCT)5	15	310	324	Integrase-type DNA-binding superfamily protein, putative [Theobroma cacao]	"DNA binding"	-	-
Ai02g26848	p3	(GGT)7	21	20	40	hypothetical protein PRUPE_ppa007571mg [Prunus persica]	-	-	-
Ai02g26849	p3	(GAA)5	15	289	303	PREDICTED: uncharacterized protein LOC100258161 isoform 1 [Vitis vinifera] ref|XP_003632234.1| PREDICTED: uncharacterized protein LOC100258161 isoform 2 [Vitis vinifera] emb|CAN80681.1| hypothetical protein VITISV_037734 [Vitis vinifera]	-	-	-
Ai02g26859	p3	(TGG)5	15	86	100	-	-	-	-
Ai02g26871	p3	(TAC)6	18	262	279	-	-	-	-
Ai02g26899	p3	(AAG)8	24	67	90	-	-	-	-
Ai02g26963	p3	(AGA)6	18	409	426	Cytochrome P450, family 96, subfamily A, polypeptide 1, putative [Theobroma cacao]	"monooxygenase activity"	"Limonene and pinene degradation"	-
Ai02g26983	p1	(A)10	10	192	201	-	-	-	-
Ai02g26993	c	(ATC)6(AGC)7	39	30	68	Duplicated homeodomain-like superfamily protein, putative [Theobroma cacao]	-	-	-
Ai02g27011	p3	(GGT)8	24	224	247	PHD finger family protein isoform 2 [Theobroma cacao]	-	-	-
Ai02g27021	p1	(T)12	12	401	412	RNA binding motif protein, putative [Ricinus communis] gb|EEF30303.1| RNA binding motif protein, putative [Ricinus communis]	"cytoplasm"	-	-
Ai02g27036	p3	(TGC)5	15	134	148	-	-	-	-
Ai02g27073	p3	(GAA)5	15	57	71	-	-	-	-
Ai02g27092	p3	(TTC)7	21	189	209	-	-	-	-
Ai02g27111	p3	(AGG)5	15	447	461	Poly polymerase 1, putative [Theobroma cacao]	-	-	-
Ai02g27131	p3	(ATC)13	39	1057	1095	Glucan endo-1,3-beta-glucosidase precursor, putative [Ricinus communis] gb|EEF38536.1| Glucan endo-1,3-beta-glucosidase precursor, putative [Ricinus communis]	"cytoplasm"	-	"Glucanendo-1
Ai02g27169	p1	(A)11	11	218	228	PREDICTED: derlin-2.2-like [Fragaria vesca subsp. vesca]	"integral to membrane"	"Protein processing in endoplasmic reticulum"	-
Ai02g27197	p3	(TGC)5	15	1689	1703	Peroxisome biogenesis protein 1 [Theobroma cacao]	"cytoplasm"	"Protein processing in endoplasmic reticulum"	-
Ai02g27209	p6	(CAGACC)5	30	20	49	DNA glycosylase superfamily protein [Theobroma cacao]	-	-	-
Ai02g27220	p3	(GAA)5	15	2352	2366	polyprotein [Cacao swollen shoot virus] gb|AAA03171.1| polyprotein [Cacao swollen shoot virus]	"peptidase activity"	-	"RNA-directedDNApolymerase."
Ai02g27238	p3	(GAA)9	27	297	323	hypothetical protein SORBIDRAFT_09g019490 [Sorghum bicolor] gb|EES18186.1| hypothetical protein SORBIDRAFT_09g019490 [Sorghum bicolor]	-	-	-
Ai02g27256	c	(GAA)5gnaagaaaaccgtatgcaaaaccnnan(GCA)6	60	132	191	PREDICTED: uncharacterized protein LOC101267539 [Solanum lycopersicum]	-	-	-
Ai02g27287	p3	(TGG)5	15	538	552	hypothetical protein [Prunus persica]	-	-	-
Ai02g27323	p3	(TTC)5	15	740	754	conserved hypothetical protein [Ricinus communis] gb|EEF35600.1| conserved hypothetical protein [Ricinus communis]	"response to brassinosteroid stimulus"	-	-
Ai02g27337	p3	(CAA)7	21	345	365	-	-	-	-
Ai02g27369	p3	(TTC)5	15	45	59	hypothetical protein AMTR_s00046p00139540 [Amborella trichopoda]	-	-	-
Ai02g27412	p5	(TGGGC)5	25	341	365	Importin alpha isoform 1 [Theobroma cacao]	-	-	-
Ai02g27434	p2	(CT)6	12	1286	1297	PREDICTED: uncharacterized protein LOC101292910 [Fragaria vesca subsp. vesca]	-	-	-
Ai02g27504	p3	(TTC)5	15	12	26	COBRA-like protein 6 precursor [Theobroma cacao]	"plasma membrane"	-	-
Ai02g27516	p3	(TCT)9	27	49	75	hypothetical protein POPTR_0001s30880g [Populus trichocarpa]	-	-	-
Ai02g27521	p3	(CAA)8	24	131	154	hypothetical protein PRUPE_ppa002537mg [Prunus persica]	-	-	-
Ai02g27541	p3	(GCA)5	15	27	41	-	-	-	-
Ai02g27571	p3	(GGT)5	15	164	178	-	-	-	-
Ai02g27576	p3	(GGC)5	15	305	319	-	-	-	-
Ai02g27607	p3	(CAT)6	18	552	569	hypothetical protein VITISV_015730 [Vitis vinifera]	-	-	-
Ai02g27612	p6	(GCAAAG)5	30	19	48	-	-	-	-
Ai02g27613	p3	(GCC)6	18	198	215	hypothetical protein POPTR_0001s29250g [Populus trichocarpa]	-	-	-
Ai02g27637	p3	(GGT)5	15	137	151	conserved hypothetical protein [Ricinus communis] gb|EEF28752.1| conserved hypothetical protein [Ricinus communis]	-	-	-
Ai02g27638	p2	(CT)6	12	345	356	Tetratricopeptide repeat-like superfamily protein [Theobroma cacao]	-	-	-
Ai02g27642	p2	(TC)6	12	113	124	hypothetical protein PRUPE_ppa003764mg [Prunus persica]	-	-	-
Ai02g27643	p3	(TGG)5	15	96	110	-	-	-	-
Ai02g27655	p1	(T)11	11	293	303	-	-	-	-
Ai02g27656	p3	(CCA)8	24	46	69	hypothetical protein [Prunus persica]	-	-	-
Ai02g27668	p3	(CTG)10	30	278	307	-	-	-	-
Ai02g27695	p3	(CCT)10	30	19	48	glycosyltransferase 8F [Populus tremula x Populus alba]	"jasmonic acid mediated signaling pathway"	-	-
Ai02g27698	p2	(GA)6	12	53	64	-	-	-	-
Ai02g27700	p2	(CT)8	16	557	572	GBF's pro-rich region-interacting factor 1 [Theobroma cacao]	-	-	-
Ai02g27726	p3	(CTC)5	15	7	21	Formin isoform 2 [Theobroma cacao]	"actin filament binding"	-	-
Ai02g27733	c	(AGC)6aacaacagcaacaacagcag(CAA)10	68	92	159	hypothetical protein PRUPE_ppa002113mg [Prunus persica]	"plasma membrane"	-	-
Ai02g27757	p3	(ACG)5	15	42	56	DNA cross-link repair protein pso2/snm1, putative [Ricinus communis] gb|EEF46166.1| DNA cross-link repair protein pso2/snm1, putative [Ricinus communis]	-	-	-
Ai02g27770	p1	(T)14	14	808	821	conserved hypothetical protein [Ricinus communis] gb|EEF41100.1| conserved hypothetical protein [Ricinus communis]	-	-	-
Ai02g27776	p3	(GAA)7	21	182	202	-	-	-	-
Ai02g27778	p3	(TGA)5	15	393	407	conserved hypothetical protein [Ricinus communis] gb|EEF28113.1| conserved hypothetical protein [Ricinus communis]	-	-	-
Ai02g27789	p3	(AGA)5	15	37	51	-	-	-	-
Ai02g27802	p3	(CCT)5	15	417	431	-	-	-	-
Ai02g27807	p3	(AAG)5	15	517	531	-	-	-	-
Ai02g27813	p3	(TGC)7	21	205	225	-	-	-	-
Ai02g27818	p3	(GGA)6	18	174	191	hypothetical protein PRUPE_ppa006097mg [Prunus persica]	"DNA binding"	-	-
Ai02g27828	p3	(GGC)5	15	38	52	PREDICTED: uncharacterized protein LOC101506791 isoform X1 [Cicer arietinum]	-	-	-
Ai02g27840	p3	(CAT)9	27	574	600	-	-	-	-
Ai02g27851	p1	(T)12	12	225	236	-	-	-	-
Ai02g27854	p3	(AGG)5	15	231	245	DNA-binding bromodomain-containing protein, putative [Theobroma cacao]	-	-	-
Ai02g27867	p3	(CGG)5	15	68	82	PREDICTED: 50S ribosomal protein L25-like [Vitis vinifera] emb|CBI17602.3| unnamed protein product [Vitis vinifera]	-	-	-
Ai02g27903	p3	(CTG)5	15	402	416	Duplicated homeodomain-like superfamily protein, putative isoform 2 [Theobroma cacao]	"regulation of stomatal complex patterning"	-	-
Ai02g27953	p2	(GA)8	16	133	148	-	-	-	-
Ai02g27986	p6	(GAAGGT)6	36	85	120	-	-	-	-
Ai02g27996	c	(GTG)13gttgtgatgatgt(TGA)8	76	440	515	ATP-binding cassette 14 [Theobroma cacao]	"ATP binding"	-	-
Ai02g28036	p3	(CAT)5	15	55	69	predicted protein [Populus trichocarpa]	"transferase activity"	-	"Long-chain-alcoholO-fatty-acyltransferase."
Ai02g28064	p3	(TGG)5	15	645	659	Uncharacterized protein TCM_006485 [Theobroma cacao]	-	-	-
Ai02g28077	p3	(GCC)5	15	1498	1512	Leucine-rich repeat/extensin 2 [Theobroma cacao]	"structural constituent of cell wall"	-	"Non-specificserine/threonineproteinkinase."
Ai02g28082	p3	(TGC)5	15	828	842	Bud27p [Saccharomyces cerevisiae CEN.PK113-7D]	-	-	-
Ai02g28100	p3	(GCC)5	15	67	81	unnamed protein product [Vitis vinifera] emb|CBI16182.3| unnamed protein product [Vitis vinifera]	"nucleosome assembly"	"Systemic lupus erythematosus"	-
Ai02g28110	p3	(TGG)6	18	675	692	Uncharacterized protein TCM_038226 [Theobroma cacao]	-	-	-
Ai02g28184	p3	(GCT)9	27	10	36	-	-	-	-
Ai02g28193	p3	(GAA)9	27	425	451	Uncharacterized protein TCM_041581 [Theobroma cacao]	-	-	-
Ai02g28236	p3	(CTC)6	18	427	444	conserved hypothetical protein [Ricinus communis] gb|EEF34984.1| conserved hypothetical protein [Ricinus communis]	"transport"	-	-
Ai02g28238	p3	(GGC)6	18	71	88	hypothetical protein CARUB_v10026686mg [Capsella rubella]	"rRNA processing"	"Ribosome biogenesis in eukaryotes"	-
Ai02g28246	p6	(GTGGAG)6	36	649	684	PREDICTED: zinc finger CCCH domain-containing protein 12-like [Cucumis sativus]	"DNA binding"	-	-
Ai02g28268	p3	(ACG)8	24	200	223	Alpha/beta-Hydrolases superfamily protein [Theobroma cacao]	-	-	-
Ai02g28270	c	(AAG)14aaaaagagtaataagaagaggaagaggaact(ATG)8	97	783	879	PREDICTED: uncharacterized protein LOC100852824 [Vitis vinifera] emb|CBI38296.3| unnamed protein product [Vitis vinifera]	-	-	-
Ai02g28275	p3	(ATC)8	24	108	131	-	-	-	-
Ai02g28277	p3	(CAT)6	18	74	91	hypothetical protein POPTR_0007s08220g [Populus trichocarpa]	-	-	-
Ai02g28288	p3	(AGA)14	42	36	77	-	-	-	-
Ai02g28289	p3	(GTG)5	15	387	401	-	-	-	-
Ai02g28309	p3	(AGG)8	24	238	261	-	-	-	-
Ai02g28324	p3	(TCA)11	33	77	109	conserved hypothetical protein [Ricinus communis] gb|EEF35979.1| conserved hypothetical protein [Ricinus communis]	-	-	-
Ai02g28358	p3	(CAT)7	21	197	217	-	-	-	-
Ai02g28383	p3	(CCA)7	21	853	873	hypothetical protein PRUPE_ppa001547mg [Prunus persica]	"RNA splicing"	-	-
Ai02g28410	p3	(GTG)5	15	274	288	-	-	-	-
Ai02g28442	p3	(CAC)8	24	549	572	hypothetical protein POPTR_0013s04360g, partial [Populus trichocarpa]	-	-	-
Ai02g28446	p3	(CAC)5	15	124	138	predicted protein [Populus trichocarpa] gb|EEE91837.1| myb family transcription factor family protein [Populus trichocarpa]	-	-	-
Ai02g28447	p3	(AGG)5	15	64	78	-	-	-	-
Ai02g28472	p3	(GGA)5	15	688	702	Uncharacterized protein isoform 1 [Theobroma cacao]	-	-	-
Ai02g28480	p3	(ACC)6	18	88	105	Proliferating cell nuclear antigen gene-controlling element binding factor, putative [Theobroma cacao]	"DNA binding"	-	-
Ai02g28502	c*	(AT)10(ATG)10*	48	149	196	-	-	-	-
Ai02g28516	p3	(GGT)5	15	356	370	Uncharacterized protein isoform 2 [Theobroma cacao]	-	-	-
Ai02g28587	p3	(TCA)7	21	184	204	conserved hypothetical protein [Ricinus communis] gb|EEF41461.1| conserved hypothetical protein [Ricinus communis]	-	-	-
Ai02g28622	c	(ATC)7aacaacaa(CAC)9	56	463	518	PREDICTED: B3 domain-containing transcription factor NGA1-like [Vitis vinifera]	"flower development"	-	-
Ai02g28640	p3	(AGA)6	18	241	258	unknown [Citrus yellow mosaic virus]	"peptidase activity"	-	"RNA-directedDNApolymerase."
Ai02g28662	p3	(CAG)8	24	12	35	Calcium-dependent protein kinase 21 isoform 3 [Theobroma cacao]	"protein phosphatase binding"	"Plant-pathogen interaction"	"Non-specificserine/threonineproteinkinase."
Ai02g28678	p3	(CTT)5	15	92	106	-	-	-	-
Ai02g28683	p3	(AAG)5	15	62	76	-	-	-	-
Ai02g28697	p3	(CAG)5	15	464	478	hypothetical protein VITISV_031319 [Vitis vinifera]	-	-	-
Ai02g28697	p3	(CAG)5	15	617	631	hypothetical protein VITISV_031319 [Vitis vinifera]	-	-	-
Ai02g28760	p3	(CCG)5	15	962	976	predicted protein [Populus trichocarpa] gb|EEE84338.1| bromo-adjacent homology (BAH) domain-containing family protein [Populus trichocarpa]	-	-	-
Ai02g28787	p6	(GATGCC)5	30	131	160	-	-	-	-
Ai02g28788	p3	(ATC)6	18	146	163	PREDICTED: uncharacterized protein LOC100242196 [Vitis vinifera] emb|CAN68393.1| hypothetical protein VITISV_019529 [Vitis vinifera]	-	-	-
Ai02g28801	p3	(AAG)6	18	212	229	-	-	-	-
Ai02g28820	p1	(T)11	11	798	808	-	-	-	-
Ai02g28821	p2	(TC)6	12	424	435	-	-	-	-
Ai02g28828	p3	(CTG)5	15	768	782	PREDICTED: uncharacterized protein LOC100779154 [Glycine max]	-	-	-
Ai02g28842	p2	(CT)7	14	1001	1014	-	-	-	-
Ai02g28858	p1	(T)10	10	2648	2657	hypothetical protein VITISV_037851 [Vitis vinifera]	-	-	-
Ai02g28864	p1	(A)13	13	980	992	-	-	-	-
Ai02g28873	p1	(A)10	10	2677	2686	ATP synthase beta subunit [Mesanthemum radicans]	"hydrogen-exporting ATPase activity	"Alzheimers disease"	"H(+)-transportingtwo-sectorATPase."
Ai02g28913	p2	(TA)6	12	158	169	-	-	-	-
Ai02g28924	p1	(A)10	10	113	122	hypothetical protein VITISV_038994 [Vitis vinifera]	-	-	-
Ai02g28939	p4	(CTGT)6	24	173	196	-	-	-	-
Ai02g28944	p1	(A)10	10	144	153	-	-	-	-
Ai02g28952	p5	(GGCAA)5	25	429	453	-	-	-	-
Ai02g28980	p1	(C)10	10	98	107	hypothetical protein AMTR_s00191p00039450 [Amborella trichopoda]	-	-	-
Ai02g29034	p3	(CAA)7	21	159	179	hypothetical protein POPTR_0002s20950g [Populus trichocarpa]	-	-	-
Ai02g29045	p3	(TCA)9	27	1859	1885	hypothetical protein VITISV_001036 [Vitis vinifera]	-	-	-
Ai02g29056	p3	(TTC)5	15	1	15	PREDICTED: uncharacterized protein LOC101489881 [Cicer arietinum] ref|XP_004517197.1| PREDICTED: uncharacterized protein LOC101512408 [Cicer arietinum]	-	-	-
Ai02g29118	p3	(GAA)5	15	140	154	-	-	-	-
Ai02g29165	p3	(TCA)5	15	1138	1152	Cc-nbs-lrr resistance protein, putative [Theobroma cacao]	-	-	-
Ai02g29202	p1	(A)10	10	8	17	O-methyltransferase family protein [Theobroma cacao]	-	-	-
Ai02g29211	p1	(T)10	10	469	478	-	-	-	-
Ai02g29214	p3	(GCT)6	18	406	423	-	-	-	-
Ai02g29215	p3	(TAA)7	21	227	247	-	-	-	-
Ai02g29219	p3	(GAT)6	18	463	480	DGCR14-related [Theobroma cacao]	"nervous system development"	-	-
Ai02g29240	p3	(CAC)5	15	1281	1295	Leucine-rich repeat family protein [Theobroma cacao]	"structural constituent of cell wall"	-	"Non-specificserine/threonineproteinkinase."
Ai02g29251	p1	(A)10	10	366	375	hypothetical protein VITISV_011134 [Vitis vinifera]	"UDP-N-acetylmuramate dehydrogenase activity"	-	-
Ai02g29254	p3	(CTG)5	15	398	412	Casparian strip membrane protein 3, putative [Theobroma cacao]	"plasma membrane"	-	-
Ai02g29255	p3	(AGC)5	15	696	710	unnamed protein product [Vitis vinifera]	-	-	-
Ai02g29261	p1	(A)12	12	14	25	predicted protein [Populus trichocarpa]	-	-	-
Ai02g29272	p1	(T)10	10	2024	2033	PREDICTED: uncharacterized protein LOC101291331 [Fragaria vesca subsp. vesca]	-	-	-
Ai02g29301	p3	(GCA)8	24	10	33	unnamed protein product [Vitis vinifera]	"cytokinin mediated signaling pathway"	"Plant hormone signal transduction"	-
Ai02g29301	p3	(CTC)5	15	137	151	unnamed protein product [Vitis vinifera]	"cytokinin mediated signaling pathway"	"Plant hormone signal transduction"	-
Ai02g29334	p3	(ACC)7	21	87	107	-	-	-	-
Ai02g29363	p3	(TGG)8	24	131	154	-	-	-	-
Ai02g29371	p3	(GAG)5	15	142	156	ssm4 protein, putative [Ricinus communis] gb|EEF43654.1| ssm4 protein, putative [Ricinus communis]	-	-	-
Ai02g29378	p3	(CAC)6	18	190	207	Phytochrome interacting factor 3-like 5, putative isoform 3 [Theobroma cacao]	"identical protein binding"	-	-
Ai02g29385	p3	(TGG)8	24	70	93	-	-	-	-
Ai02g29412	p3	(ATG)8	24	441	464	predicted protein [Populus trichocarpa] gb|ERP66699.1| Cf-4/9 disease resistance-like family protein [Populus trichocarpa]	-	-	-
Ai02g29437	p2	(TA)6	12	446	457	Major facilitator superfamily protein [Theobroma cacao]	"substrate-specific transmembrane transporter activity"	-	-
Ai02g29450	p3	(CTT)5	15	240	254	Rubredoxin, putative [Ricinus communis] gb|EEF49703.1| Rubredoxin, putative [Ricinus communis]	"iron ion binding"	-	-
Ai02g29455	p3	(AGA)8	24	470	493	PREDICTED: protein RCC2 homolog [Fragaria vesca subsp. vesca]	-	-	-
Ai02g29465	p2	(TA)6	12	1255	1266	unnamed protein product [Vitis vinifera]	"metabolic process"	"Monoterpenoid biosynthesis"	"Beta-farnesenesynthase."
Ai02g29485	p3	(CCA)5	15	19	33	predicted protein [Populus trichocarpa] gb|EEF04719.1| hypothetical protein POPTR_0016s11900g [Populus trichocarpa]	"plasma membrane"	-	-
Ai02g29490	p3	(GAA)11	33	237	269	RING/U-box superfamily protein [Theobroma cacao]	-	-	-
Ai02g29490	p3	(GAA)6	18	676	693	RING/U-box superfamily protein [Theobroma cacao]	-	-	-
Ai02g29526	p3	(CTG)8	24	469	492	RecName: Full=Casparian strip membrane protein 3	-	-	-
Ai02g29540	p1	(G)17	17	551	567	-	-	-	-
Ai02g29614	p3	(TGC)5	15	95	109	Uncharacterized protein isoform 3 [Theobroma cacao]	-	-	-
Ai02g29615	p3	(AGC)5	15	51	65	NAC domain transcriptional regulator superfamily protein, putative [Theobroma cacao]	"DNA binding"	-	-
Ai02g29618	p1	(A)11	11	669	679	hypothetical protein VITISV_027079 [Vitis vinifera]	-	-	-
Ai02g29654	p3	(AGA)5	15	656	670	Cell division AAA ATPase family protein [Medicago truncatula] gb|AES74654.1| Cell division AAA ATPase family protein [Medicago truncatula]	-	-	-
Ai02g29695	p3	(GCA)7	21	80	100	Pleckstrin domain-containing family N member 1 [Theobroma cacao]	-	-	-
Ai02g29695	p3	(AAG)6	18	404	421	Pleckstrin domain-containing family N member 1 [Theobroma cacao]	-	-	-
Ai02g29720	p6	(GAAGAG)5	30	1228	1257	hypothetical protein VITISV_025072 [Vitis vinifera]	"cytoplasm"	-	-
Ai02g29742	c	(CAA)12aatcaacaaaacccacaacagtctcagcagcagcnaacaacagcaacaa(CAG)5	100	121	220	unknown [Lotus japonicus]	-	-	-
Ai02g29766	p3	(ATC)5	15	1166	1180	PREDICTED: probable LRR receptor-like serine/threonine-protein kinase At4g08850-like [Vitis vinifera]	"protein kinase activity"	"Plant hormone signal transduction"	"Non-specificserine/threonineproteinkinase."
Ai02g29813	p3	(GAA)5	15	320	334	-	-	-	-
Ai02g29815	p3	(GAT)5	15	406	420	Receptor like protein 6, putative [Theobroma cacao]	-	-	-
Ai02g29816	p3	(GAT)5	15	1	15	Receptor like protein 33 [Theobroma cacao]	-	-	-
Ai02g29845	p3	(GAG)5	15	27	41	PREDICTED: reticuline oxidase-like protein-like [Glycine max]	"UDP-N-acetylmuramate dehydrogenase activity"	-	-
Ai02g29869	p3	(CTG)5	15	328	342	-	-	-	-
Ai02g29881	c	(AG)6tgtgaatccaaatctatcaatcagatcagagaggatgcagcaacaacagca(GGC)10	93	1	93	-	-	-	-
Ai02g29911	p1	(T)12	12	73	84	hypothetical protein PRUPE_ppa020149mg [Prunus persica]	-	-	-
Ai02g29913	p3	(CAA)8	24	49	72	Sequence-specific DNA binding transcription factors isoform 2 [Theobroma cacao]	-	-	-
Ai02g29916	p3	(CCA)5	15	312	326	uncharacterized protein LOC100500601 [Glycine max] gb|ACU15727.1| unknown [Glycine max] gb|AEQ55267.1| ethylene-responsive transcription factor 6 [Glycine max]	-	-	-
Ai02g29948	p1	(T)11	11	834	844	arginine biosynthesis bifunctional protein ArgJ [Arabidopsis thaliana] sp|Q9ZUR7.2|ARGJ_ARATH RecName: Full=Arginine biosynthesis bifunctional protein ArgJ, chloroplastic; Includes: RecName: Full=Glutamate N-acetyltransferase; Short=GAT; AltName: Full=Ornithine acetyltransferase; Short=OATase; AltName: Full=Ornithine transacetylase; Includes: RecName: Full=Amino-acid acetyltransferase; AltName: F…	"metabolic process"	"Arginine and proline metabolism"	"Amino-acidN-acetyltransferase."
Ai02g29974	p6	(GCAGCC)5	30	306	335	NAC transcription factor 025 [Jatropha curcas]	"jasmonic acid biosynthetic process"	-	-
Ai02g29989	p3	(AAC)5	15	361	375	hypothetical protein VITISV_029336 [Vitis vinifera]	"peptidase activity"	-	"RNA-directedDNApolymerase."
Ai02g29999	p3	(CAT)7	21	464	484	Abscisic acid-insensitive protein, putative [Ricinus communis] gb|EEF41288.1| Abscisic acid-insensitive protein, putative [Ricinus communis]	"cytoplasm"	-	-
Ai02g30010	p1	(T)12	12	1187	1198	unnamed protein product [Vitis vinifera]	"ATP binding"	-	-
Ai02g30023	p3	(ATG)6	18	55	72	-	-	-	-
Ai02g30041	p3	(GAG)5	15	421	435	Tetratricopeptide repeat-like superfamily protein [Theobroma cacao]	-	-	-
Ai02g30057	p3	(CGC)5	15	140	154	PREDICTED: putative uncharacterized protein DDB_G0271606-like isoform X1 [Cicer arietinum] ref|XP_004497040.1| PREDICTED: putative uncharacterized protein DDB_G0271606-like isoform X2 [Cicer arietinum]	-	-	-
Ai02g30063	p2	(TA)8	16	243	258	predicted protein [Populus trichocarpa]	"protein targeting to vacuole"	-	"Pectinesterase."
Ai02g30105	p2	(AT)7	14	407	420	NAC domain protein, IPR003441 [Theobroma cacao]	"DNA binding"	-	-
Ai02g30191	p3	(CAC)5	15	165	179	-	-	-	-
Ai02g30211	p3	(GCA)5	15	475	489	predicted protein [Populus trichocarpa] gb|EEE92303.1| hypothetical protein POPTR_0006s01190g [Populus trichocarpa]	"transferase activity	-	"Vinorinesynthase."
Ai02g30227	p3	(GCC)5	15	41	55	Uncharacterized protein TCM_021521 [Theobroma cacao]	-	-	-
Ai02g30296	p1	(A)10	10	174	183	hypothetical protein VITISV_044169 [Vitis vinifera]	-	-	-
Ai02g30370	p3	(AAT)5	15	485	499	Zinc finger protein, putative isoform 1 [Theobroma cacao] gb|EOY22189.1| Zinc finger protein, putative isoform 1 [Theobroma cacao]	"protein ubiquitination"	-	-
Ai02g30373	p3	(CCG)5	15	85	99	translation initiation factor 2b, delta subunit, putative [Ricinus communis] gb|EEF50656.1| translation initiation factor 2b, delta subunit, putative [Ricinus communis]	-	-	-
Ai02g30404	p3	(GAG)6	18	117	134	-	-	-	-
Ai02g30408	p3	(GCT)6	18	4	21	-	-	-	-
Ai02g30410	p3	(CTT)5	15	80	94	Uncharacterized protein TCM_020295 [Theobroma cacao]	"cytoplasm"	-	-
Ai02g30455	p3	(AAC)6	18	322	339	conserved hypothetical protein [Ricinus communis] gb|EEF32221.1| conserved hypothetical protein [Ricinus communis]	-	-	-
Ai02g30471	p3	(CAA)9	27	76	102	-	-	-	-
Ai02g30481	p3	(AGA)7	21	510	530	-	-	-	-
Ai02g30499	p3	(GAA)7	21	1301	1321	Cysteine-rich receptor-like protein kinase 40 isoform 2 [Theobroma cacao]	"protein kinase activity"	-	"Non-specificserine/threonineproteinkinase."
Ai02g30508	p3	(GAA)5	15	15	29	Hydroxyproline-rich glycoprotein family protein, putative [Theobroma cacao]	-	-	-
Ai02g30508	p3	(CGC)5	15	1004	1018	Hydroxyproline-rich glycoprotein family protein, putative [Theobroma cacao]	-	-	-
Ai02g30508	p3	(GAA)5	15	1143	1157	Hydroxyproline-rich glycoprotein family protein, putative [Theobroma cacao]	-	-	-
Ai02g30605	p3	(GCT)6	18	101	118	unnamed protein product [Vitis vinifera] gb|ADP37166.1| putative ERD6-like transporter [Vitis vinifera]	-	-	-
Ai02g30620	p3	(CAG)8	24	393	416	predicted protein [Populus trichocarpa] gb|EEE82824.1| hypothetical protein POPTR_0001s09680g [Populus trichocarpa]	-	-	-
Ai02g30629	p3	(AGC)6	18	165	182	predicted protein [Populus trichocarpa] gb|EEE96866.1| hypothetical protein POPTR_0012s08050g [Populus trichocarpa]	-	-	-
Ai02g30681	p3	(AGA)6	18	97	114	-	-	-	-
Ai02g30681	p3	(ACA)5	15	246	260	-	-	-	-
Ai02g30701	p3	(GCA)5	15	116	130	-	-	-	-
Ai02g30777	p3	(CCA)5	15	117	131	Toxicos en levadura 4, putative [Theobroma cacao]	"protein ubiquitination"	-	-
Ai02g30784	p3	(TTC)13	39	80	118	hypothetical protein PRUPE_ppa002700mg [Prunus persica]	-	-	-
Ai02g30785	p3	(CAC)5	15	50	64	hypothetical protein VITISV_037476 [Vitis vinifera]	-	-	-
Ai02g30796	p6	(CAACAG)5	30	705	734	AP2 domain class transcription factor [Malus domestica]	-	-	-
Ai02g30841	p3	(CAA)7	21	42	62	-	-	-	-
Ai02g30859	p3	(CCA)5	15	29	43	-	-	-	-
Ai02g30875	p3	(GAA)5	15	517	531	PREDICTED: ent-kaurenoic acid oxidase 2-like [Fragaria vesca subsp. vesca]	-	-	-
Ai02g30925	p3	(TGA)5	15	107	121	-	-	-	-
Ai02g30931	p3	(TAA)6	18	458	475	hypothetical protein M569_13847, partial [Genlisea aurea]	-	-	-
Ai02g30956	p3	(TGC)5	15	45	59	-	-	-	-
Ai02g30978	p3	(TTC)6	18	4	21	D-mannose binding lectin protein with Apple-like carbohydrate-binding domain, putative [Theobroma cacao]	"carbohydrate binding"	-	-
Ai02g30989	p3	(TGA)5	15	114	128	-	-	-	-
Ai02g31000	p3	(TTA)5	15	265	279	Leucine-rich receptor-like protein kinase family protein [Theobroma cacao]	"stamen development"	-	"Non-specificserine/threonineproteinkinase."
Ai02g31021	p3	(GGC)6	18	32	49	ATP binding protein, putative [Ricinus communis] gb|EEF43833.1| ATP binding protein, putative [Ricinus communis]	"cytoplasm"	"MAPK signaling pathway"	"Mitogen-activatedproteinkinasekinasekinase."
Ai02g31021	p3	(GAA)9	27	917	943	ATP binding protein, putative [Ricinus communis] gb|EEF43833.1| ATP binding protein, putative [Ricinus communis]	"cytoplasm"	"MAPK signaling pathway"	"Mitogen-activatedproteinkinasekinasekinase."
Ai02g31043	p5	(AGAGA)5	25	359	383	unnamed protein product [Vitis vinifera]	"monooxygenase activity"	-	"Secologaninsynthase."
Ai02g31052	p3	(TGA)5	15	572	586	hypothetical protein POPTR_0017s00200g [Populus trichocarpa]	-	-	-
Ai02g31092	p3	(ATG)5	15	44	58	hypothetical protein ARALYDRAFT_494746 [Arabidopsis lyrata subsp. lyrata] gb|EFH41746.1| hypothetical protein ARALYDRAFT_494746 [Arabidopsis lyrata subsp. lyrata]	-	-	-
Ai02g31097	p3	(TGG)5	15	98	112	-	-	-	-
Ai02g31099	p3	(AAG)6	18	25	42	-	-	-	-
Ai02g31185	p4	(AAGC)6	24	99	122	-	-	-	-
Ai02g31192	p1	(A)10	10	374	383	Uncharacterized protein TCM_035549 [Theobroma cacao]	-	-	-
Ai02g31197	p3	(GGT)6	18	146	163	-	-	-	-
Ai02g31220	p1	(T)16	16	632	647	predicted protein [Populus trichocarpa]	-	-	-
Ai02g31230	p3	(TGG)5	15	471	485	hypothetical protein PRUPE_ppa012563mg [Prunus persica]	"cytoplasm"	"Ribosome"	-
Ai02g31232	p3	(AGC)5	15	344	358	hypothetical protein PRUPE_ppa018374mg, partial [Prunus persica]	"protein kinase activity"	"Plant hormone signal transduction"	"Non-specificserine/threonineproteinkinase."
Ai02g31238	p3	(CCG)5	15	17	31	C2 calcium/lipid-binding plant phosphoribosyltransferase family protein [Theobroma cacao]	-	-	-
Ai02g31260	p3	(AAG)7	21	128	148	unknown [Glycine max]	"CUL4 RING ubiquitin ligase complex"	"p53 signaling pathway"	-
Ai02g31304	p3	(GAT)8	24	165	188	hypothetical protein PRUPE_ppa024297mg, partial [Prunus persica]	-	-	-
Ai02g31322	p3	(CAA)11	33	65	97	Sequence-specific DNA binding transcription factors isoform 2 [Theobroma cacao]	-	-	-
Ai02g31329	p3	(CAA)6	18	332	349	-	-	-	-
Ai02g31406	p3	(CGC)5	15	69	83	ERF3 [Populus x canadensis]	-	-	-
Ai02g31406	p3	(AAT)5	15	328	342	ERF3 [Populus x canadensis]	-	-	-
Ai02g31439	p3	(AGC)5	15	266	280	RNA-binding protein [Arabidopsis thaliana]	-	-	-
Ai02g31489	p3	(CAT)6	18	12	29	NAC domain protein [Malus hupehensis]	-	-	-
Ai02g31497	p3	(ACA)8	24	13	36	PREDICTED: general transcription factor IIF subunit 2-like [Glycine max]	-	-	-
Ai02g31504	p3	(GCG)5	15	104	118	-	-	-	-
Ai02g31507	p3	(TCT)5	15	421	435	PREDICTED: laccase-14-like [Vitis vinifera]	"copper ion binding"	-	"Laccase."
Ai02g31530	p3	(CAC)5	15	389	403	spliceosome associated protein, putative [Ricinus communis] gb|EEF46011.1| spliceosome associated protein, putative [Ricinus communis]	-	-	-
Ai02g31602	p3	(GAA)6	18	78	95	PREDICTED: uncharacterized protein LOC100263294 [Vitis vinifera]	-	-	-
Ai02g31636	p3	(GAT)7	21	392	412	-	-	-	-
Ai02g31644	p3	(CCA)5	15	3	17	unnamed protein product [Vitis vinifera]	"lipid transport"	-	-
Ai02g31646	p3	(CAA)5	15	404	418	-	-	-	-
Ai02g31669	p3	(CAG)5	15	274	288	predicted protein [Populus trichocarpa]	"protein kinase activity"	"Wnt signaling pathway"	-
Ai02g31688	p3	(GAG)5	15	395	409	-	-	-	-
Ai02g31722	p2	(AG)11	22	41	62	PREDICTED: histone deacetylase 5-like [Vitis vinifera] emb|CBI15124.3| unnamed protein product [Vitis vinifera]	"cytoplasm"	-	"Histonedeacetylase."
Ai02g31797	p3	(AGA)6	18	324	341	unnamed protein product [Vitis vinifera]	-	-	-
Ai02g31814	p3	(GAA)5	15	1079	1093	PREDICTED: TMV resistance protein N-like [Vitis vinifera]	"callose deposition in cell wall"	-	-
Ai02g31818	p3	(GCT)5	15	441	455	hypothetical protein PRUPE_ppa019901mg [Prunus persica]	"plasma membrane"	-	-
Ai02g31838	p3	(AGC)8	24	420	443	protein phosphatase 2C [Nicotiana tabacum]	"leaf senescence"	"Plant hormone signal transduction"	"Phosphoproteinphosphatase."
Ai02g31839	p3	(ACA)8	24	24	47	PREDICTED: uncharacterized protein At4g28440-like [Cucumis sativus] ref|XP_004167261.1| PREDICTED: uncharacterized protein At4g28440-like [Cucumis sativus]	"proteasome core complex assembly"	"Mismatch repair"	-
Ai02g31877	p3	(CAG)5	15	809	823	SEUSS transcriptional co-regulator isoform 3 [Theobroma cacao]	"flower development"	-	-
Ai02g31879	p1	(T)10	10	1026	1035	Uncharacterized protein TCM_019417 [Theobroma cacao]	-	-	-
Ai02g31889	p3	(CTC)5	15	103	117	-	-	-	-
Ai02g31902	p3	(CTT)5	15	11	25	hypothetical protein POPTR_0077s002001g, partial [Populus trichocarpa]	"cytoplasm"	-	-
Ai02g31954	p3	(GAT)14	42	85	126	-	-	-	-
Ai02g31957	p2	(CT)11	22	8	29	expansin [Breonia chinensis] gb|AEQ55286.1| expansin [Breonia chinensis]	"syncytium formation"	-	-
Ai02g31984	p3	(GGT)7	21	127	147	-	-	-	-
Ai02g32020	p3	(AAC)7	21	640	660	hypothetical protein VITISV_023355 [Vitis vinifera]	-	-	-
Ai02g32033	c	(AGA)5agtggaagaagagcaagaagaggaaggagaagaagag(GAA)7	73	114	186	PREDICTED: uncharacterized protein LOC100243393 [Vitis vinifera]	-	-	-
Ai02g32033	p3	(CTG)5	15	651	665	PREDICTED: uncharacterized protein LOC100243393 [Vitis vinifera]	-	-	-
Ai02g32045	p2	(CT)6	12	462	473	predicted protein [Populus trichocarpa] gb|ERP47897.1| Cf-4/9 disease resistance-like family protein [Populus trichocarpa]	-	-	-
Ai02g32046	p3	(AGC)8	24	1	24	-	-	-	-
Ai02g32072	c	(AAG)11aaatggtcgagccgc(AAG)9	75	1	75	hypothetical protein POPTR_0001s41830g [Populus trichocarpa]	"cGMP binding"	-	-
Ai02g32075	p3	(GAT)5	15	591	605	-	-	-	-
Ai02g32080	p3	(GCG)5	15	99	113	Indoleacetic acid-induced protein 16 [Theobroma cacao]	"protein dimerization activity"	"Plant hormone signal transduction"	-
Ai02g32104	p3	(AAT)7	21	171	191	seed maturation protein [Glycine tomentella] gb|ABB72395.1| seed maturation protein [Glycine tomentella] gb|ABB72398.1| seed maturation protein [Glycine tomentella] gb|ABB72399.1| seed maturation protein [Glycine tomentella] gb|ABB72401.1| seed maturation protein [Glycine tomentella] gb|ABB72403.1| seed maturation protein [Glycine tomentella] gb|ABB72404.1| seed maturation protein [Glycine toment…	-	-	-
Ai02g32129	p3	(ACA)9	27	105	131	PREDICTED: ethylene-responsive transcription factor RAP2-7-like [Vitis vinifera]	-	-	-
Ai02g32195	p3	(TGG)5	15	54	68	-	-	-	-
Ai02g32196	p3	(ACC)7	21	48	68	Acyl activating enzyme 5 [Theobroma cacao]	"metabolic process"	-	-
Ai02g32220	c	(TTC)5naacna(TCT)9	48	164	211	-	-	-	-
Ai02g32238	p5	(TTGTG)5	25	6	30	-	-	-	-
Ai02g32262	p3	(TGC)9	27	67	93	-	-	-	-
Ai02g32264	p5	(TATGC)6	30	307	336	-	-	-	-
Ai02g32265	p3	(GAG)5	15	100	114	-	-	-	-
Ai02g32300	p3	(GAA)5	15	25	39	hypothetical protein VITISV_037350 [Vitis vinifera]	-	-	-
Ai02g32311	p1	(T)12	12	397	408	conserved hypothetical protein [Ricinus communis] gb|EEF41650.1| conserved hypothetical protein [Ricinus communis]	-	-	-
Ai02g32343	p3	(ACC)6	18	239	256	Uncharacterized protein TCM_020625 [Theobroma cacao]	-	-	-
Ai02g32422	p3	(ACC)5	15	120	134	-	-	-	-
Ai02g32508	p3	(CTT)7	21	23	43	Exostosin family protein [Theobroma cacao]	"fucose biosynthetic process"	-	-
Ai02g32570	p3	(GAA)7	21	211	231	-	-	-	-
Ai02g32572	p3	(CCA)5	15	100	114	-	-	-	-
Ai02g32600	p6	(GGTTCA)10	60	223	282	hypothetical protein POPTR_0007s01230g [Populus trichocarpa]	-	-	-
Ai02g32638	p3	(ATG)5	15	81	95	-	-	-	-
Ai02g32653	p3	(CGC)5	15	89	103	-	-	-	-
Ai02g32653	p3	(CCT)5	15	215	229	-	-	-	-
Ai02g32658	p3	(GAA)7	21	155	175	-	-	-	-
Ai02g32662	p2	(CT)12	24	1	24	hypothetical protein VITISV_021777 [Vitis vinifera]	"endosome membrane"	-	-
Ai02g32699	p3	(CCG)7	21	123	143	-	-	-	-
Ai02g32704	p3	(CCA)5	15	448	462	PREDICTED: uncharacterized protein LOC101227024 [Cucumis sativus]	"flower development"	-	-
Ai02g32704	p2	(CT)6	12	567	578	PREDICTED: uncharacterized protein LOC101227024 [Cucumis sativus]	"flower development"	-	-
Ai02g32706	c	(GAT)5nn(GAT)10	47	53	99	-	-	-	-
Ai02g32731	p6	(AGCAGA)6	36	48	83	-	-	-	-
Ai02g32737	p3	(AGC)6	18	311	328	PREDICTED: uncharacterized protein LOC100254797 [Vitis vinifera]	"flower development"	-	-
Ai02g32758	c	(CAA)5tggtaacaatggcaatgg(CAA)5cagtggcaacaatgg(CAA)9	90	104	193	O-Glycosyl hydrolases family 17 protein [Arabidopsis thaliana] dbj|BAA97291.1| beta-1,3-glucanase [Arabidopsis thaliana] gb|AED97951.1| O-Glycosyl hydrolases family 17 protein [Arabidopsis thaliana]	"metabolic process"	-	"Glucanendo-1
Ai02g32773	p3	(CCG)8	24	161	184	-	-	-	-
Ai02g32790	p3	(GAA)7	21	448	468	-	-	-	-
Ai02g32807	p6	(CACCAG)5	30	39	68	Histone deacetylase [Medicago truncatula] gb|ABD32780.1| Histone deacetylase superfamily [Medicago truncatula] gb|AES67133.1| Histone deacetylase [Medicago truncatula]	"histone deacetylase activity (H4-K16 specific)"	-	"Histonedeacetylase."
Ai02g32830	p1	(A)10	10	9	18	UDP-glucosyltransferase 74F2, putative [Theobroma cacao]	"metabolic process"	"Tryptophan metabolism"	"N-hydroxythioamideS-beta-glucosyltransferase."
Ai02g32831	p3	(AGG)5	15	297	311	hypothetical protein VITISV_013427 [Vitis vinifera]	-	-	-
Ai02g32835	p3	(TGG)5	15	132	146	-	-	-	-
Ai02g32835	c	(GGT)5ttatggcgcggcggtgggggacagtttgct(GGA)7	66	397	462	-	-	-	-
Ai02g32855	p3	(GCT)5	15	74	88	-	-	-	-
Ai02g32859	p3	(CAC)16	48	45	92	-	-	-	-
Ai02g32882	p3	(GAA)5	15	256	270	Uncharacterized protein TCM_017094 [Theobroma cacao]	-	-	-
Ai02g32886	p3	(AAG)8	24	154	177	-	-	-	-
Ai02g32907	p3	(TGA)5	15	138	152	-	-	-	-
Ai02g32918	p3	(GAA)9	27	397	423	hypothetical protein POPTR_0014s05690g [Populus trichocarpa]	-	-	-
Ai02g32975	p3	(GAG)7	21	93	113	-	-	-	-
Ai02g32989	p3	(GAT)7	21	185	205	-	-	-	-
Ai02g33004	p3	(AGA)9	27	47	73	-	-	-	-
Ai02g33030	p3	(TGT)12	36	96	131	-	-	-	-
Ai02g33048	p3	(CAG)6	18	176	193	-	-	-	-
Ai02g33066	p3	(GGT)6	18	12	29	-	-	-	-
Ai02g33066	p3	(GTG)7	21	134	154	-	-	-	-
Ai02g33083	p3	(CAG)5	15	436	450	Octicosapeptide/Phox/Bem1p family protein, putative [Theobroma cacao]	-	-	-
Ai02g33120	c	(ACC)5(AAC)5	30	283	312	BEL1-like homeodomain protein 2 isoform 1 [Theobroma cacao]	-	-	-
Ai02g33126	p3	(AGT)11	33	10	42	ethylene-insensitive 3-like 1 protein [Citrus sinensis]	-	-	-
Ai02g33137	p3	(GAT)12	36	52	87	-	-	-	-
Ai02g33194	p3	(CCG)5	15	139	153	-	-	-	-
Ai02g33251	p3	(TGG)7	21	389	409	conserved hypothetical protein [Medicago truncatula]	-	-	-
Ai02g33293	p3	(GGT)5	15	387	401	Myb domain protein 106, putative [Theobroma cacao]	-	-	-
Ai02g33308	p3	(GAC)11	33	256	288	transcription factor, putative [Ricinus communis] gb|EEF28945.1| transcription factor, putative [Ricinus communis]	-	-	-
Ai02g33319	p3	(GCA)7	21	76	96	predicted protein [Populus trichocarpa]	-	-	-
Ai02g33362	p3	(AGC)6	18	32	49	-	-	-	-
Ai02g33390	p6	(ATCAAG)5	30	122	151	-	-	-	-
Ai02g33400	p3	(AGG)8	24	111	134	-	-	-	-
Ai02g33403	p3	(ATG)8	24	1	24	-	-	-	-
Ai02g33420	p3	(GAT)16	48	42	89	-	-	-	-
Ai02g33440	p3	(CAA)5	15	449	463	-	-	-	-
Ai02g33476	p3	(GAA)5	15	293	307	-	-	-	-
Ai02g33494	c	(CAA)7(CAG)11	54	58	111	-	-	-	-
Ai02g33497	c	(TCC)6(TCA)6	36	15	50	Fasciclin-like arabinogalactan family protein, putative [Theobroma cacao]	-	-	-
Ai02g33517	p1	(A)10	10	6	15	hypothetical protein VITISV_001876 [Vitis vinifera]	-	-	-
Ai02g33530	p3	(CGG)6	18	184	201	-	-	-	-
Ai02g33533	p3	(GGA)5	15	31	45	-	-	-	-
Ai02g33539	p3	(ACC)5	15	6	20	-	-	-	-
Ai02g33545	p3	(CTG)6	18	47	64	-	-	-	-
Ai02g33550	p3	(CAA)5	15	11	25	-	-	-	-
Ai02g33550	p3	(CAG)6	18	143	160	-	-	-	-
Ai02g33553	c	(CAA)9cggcaacacgagcaacaattctt(CTG)6ttgttgcttctgaacttcaccgtcatcatcttcatttacag(CAA)6	127	38	164	TCP family transcription factor [Theobroma cacao]	-	-	-
Ai02g33571	p3	(AGA)6	18	745	762	predicted protein [Populus trichocarpa] gb|ERP66261.1| Chain H family protein [Populus trichocarpa]	"protein kinase activity"	-	"Non-specificserine/threonineproteinkinase."
Ai02g33597	p3	(CAG)5	15	182	196	Uncharacterized protein TCM_007416 [Theobroma cacao]	-	-	-
Ai02g33610	p3	(AAG)8	24	46	69	-	-	-	-
Ai02g33614	p3	(GAA)6	18	154	171	Uncharacterized protein isoform 2 [Theobroma cacao]	-	-	-
Ai02g33624	c	(ACC)5acaacctttgcaatcttcgttgttagttcctaaaactattcagaaaagttantgtgacnccctcn(CCT)8	104	349	452	predicted protein [Populus trichocarpa]	-	-	-
Ai02g33645	p3	(TGC)7	21	218	238	Kinase superfamily protein with octicosapeptide/Phox/Bem1p domain, putative isoform 1 [Theobroma cacao] gb|EOY31310.1| Kinase superfamily protein with octicosapeptide/Phox/Bem1p domain, putative isoform 1 [Theobroma cacao]	-	-	-
Ai02g33660	p3	(TCG)5	15	178	192	C2H2L domain class transcription factor [Malus domestica]	"biological_process"	-	-
Ai02g33679	p3	(AGC)5	15	257	271	-	-	-	-
Ai02g33707	p3	(TTC)7	21	159	179	Eukaryotic aspartyl protease family protein, putative isoform 1 [Theobroma cacao] gb|EOY08436.1| Eukaryotic aspartyl protease family protein, putative isoform 1 [Theobroma cacao] gb|EOY08437.1| Eukaryotic aspartyl protease family protein, putative isoform 1 [Theobroma cacao]	-	-	-
Ai02g33732	p3	(CAA)10	30	317	346	-	-	-	-
Ai02g33740	p3	(AAG)6	18	79	96	-	-	-	-
Ai02g33740	p3	(GAA)6	18	374	391	-	-	-	-
Ai02g33741	p3	(ACC)5	15	609	623	-	-	-	-
Ai02g33804	c	(TTC)6(TGC)10	48	33	80	DNA binding protein, putative [Ricinus communis] gb|EEF40548.1| DNA binding protein, putative [Ricinus communis]	"pollen wall assembly"	-	-
Ai02g33811	p3	(ATG)5	15	139	153	-	-	-	-
Ai02g33814	p2	(AG)6	12	161	172	-	-	-	-
Ai02g33898	p3	(GGC)9	27	271	297	-	-	-	-
Ai02g33905	c	(ACC)7tcctccacctctgtcacagacactg(CCA)7	67	143	209	predicted protein [Populus trichocarpa] gb|EEE81453.1| trihelix DNA-binding family protein [Populus trichocarpa]	"DNA binding"	-	-
Ai02g33905	p3	(GAA)5	15	753	767	predicted protein [Populus trichocarpa] gb|EEE81453.1| trihelix DNA-binding family protein [Populus trichocarpa]	"DNA binding"	-	-
Ai02g33914	p3	(GGT)8	24	241	264	-	-	-	-
Ai02g33917	p3	(AAG)6	18	65	82	hypothetical protein PRUPE_ppa020302mg [Prunus persica]	-	-	-
Ai02g33931	p3	(CAA)5	15	103	117	SAUR family protein [Theobroma cacao]	-	-	-
Ai02g33938	p3	(GCT)9	27	125	151	-	-	-	-
Ai02g33986	p3	(GAA)11	33	68	100	-	-	-	-
Ai02g34015	p3	(CTC)6	18	53	70	conserved hypothetical protein [Ricinus communis] gb|EEF28600.1| conserved hypothetical protein [Ricinus communis]	-	-	-
Ai02g34037	p3	(GAA)5	15	90	104	hypothetical protein PRUPE_ppa000613mg [Prunus persica]	"vegetative to reproductive phase transition of meristem"	-	-
Ai02g34039	p3	(ACA)11	33	83	115	WRKY transcription factor 1 [(Populus tomentosa x P. bolleana) x P. tomentosa]	-	-	-
Ai02g34065	p3	(CAG)5	15	71	85	-	-	-	-
Ai02g34150	p3	(CCA)6	18	49	66	predicted protein [Populus trichocarpa] gb|EEE80214.1| hypothetical protein POPTR_0002s07280g [Populus trichocarpa]	-	-	-
Ai02g34150	p3	(ATC)7	21	490	510	predicted protein [Populus trichocarpa] gb|EEE80214.1| hypothetical protein POPTR_0002s07280g [Populus trichocarpa]	-	-	-
Ai02g34166	c	(CAA)8tggtaacaatggcaatgg(CAA)5	57	469	525	-	-	-	-
Ai02g34168	p3	(CAT)7	21	938	958	Uncharacterized protein TCM_015688 [Theobroma cacao]	-	-	-
Ai02g34193	p3	(CTT)7	21	41	61	Uncharacterized protein TCM_020295 [Theobroma cacao]	-	-	-
Ai02g34194	p3	(TTC)7	21	945	965	PREDICTED: trichohyalin-like [Cicer arietinum]	-	-	-
Ai02g34210	p3	(GAA)11	33	28	60	Uncharacterized protein TCM_007502 [Theobroma cacao]	-	-	-
Ai02g34216	p3	(TAA)6	18	351	368	PREDICTED: uncharacterized protein LOC101219995 [Cucumis sativus] ref|XP_004163219.1| PREDICTED: uncharacterized LOC101219995 [Cucumis sativus]	-	-	-
Ai02g34224	p3	(AGC)5	15	16	30	conserved hypothetical protein [Ricinus communis] gb|EEF28067.1| conserved hypothetical protein [Ricinus communis]	-	-	-
Ai02g34232	c	(ACC)6tcctccacctctgtcacagacactg(CCA)9	70	811	880	trihelix DNA-binding family protein [Populus trichocarpa]	"DNA binding"	-	-
Ai02g34238	p3	(GGC)5	15	22	36	Kinase superfamily protein isoform 2 [Theobroma cacao] gb|EOY02367.1| Kinase superfamily protein isoform 2 [Theobroma cacao] gb|EOY02368.1| Kinase superfamily protein isoform 2 [Theobroma cacao]	-	-	-
Ai02g34257	p2	(AC)6	12	259	270	-	-	-	-
Ai02g34279	p3	(AAG)5	15	946	960	conserved hypothetical protein [Ricinus communis] gb|EEF41061.1| conserved hypothetical protein [Ricinus communis]	-	-	-
Ai02g34307	p3	(CAT)6	18	4	21	Galactose-1-phosphate uridylyltransferase [Theobroma cacao]	"positive regulation of cellular response to phosphate starvation"	"Galactose metabolism"	"UDP-glucose--hexose-1-phosphateuridylyltransferase."
Ai02g34342	p3	(GGT)6	18	136	153	-	-	-	-
Ai02g34351	p2	(AG)6	12	401	412	hypothetical protein PRUPE_ppa007087mg [Prunus persica]	"cytoplasm"	"Spliceosome"	-
Ai02g34365	p1	(T)13	13	431	443	-	-	-	-
Ai02g34398	p2	(CT)6	12	428	439	Receptor like protein 6, putative [Theobroma cacao]	-	-	-
Ai02g34400	p3	(CTC)8	24	302	325	-	-	-	-
Ai02g34448	p3	(GGT)5	15	448	462	-	-	-	-
Ai02g34469	p2	(AG)6	12	7	18	unknown [Populus trichocarpa] gb|EEF03288.2| Eukaryotic translation initiation factor 3 subunit 11 family protein [Populus trichocarpa]	-	-	-
Ai02g34477	p3	(GGT)6	18	391	408	Cyclin-dependent kinase C,1 isoform 2, partial [Theobroma cacao]	"protein kinase activity"	-	"[RNA-polymerase]-subunitkinase."
Ai02g34490	p6	(GCTCAG)7	42	328	369	-	-	-	-
Ai02g34503	p3	(TCT)5	15	136	150	conserved hypothetical protein [Ricinus communis] gb|EEF29000.1| conserved hypothetical protein [Ricinus communis]	-	-	-
Ai02g34512	p3	(TGG)8	24	66	89	-	-	-	-
Ai02g34533	c	(GAC)7gat(GAG)7	45	233	277	-	-	-	-
Ai02g34535	p3	(CTT)5	15	107	121	-	-	-	-
Ai02g34540	p3	(AGC)10	30	18	47	-	-	-	-
Ai02g34556	p3	(GAG)5	15	698	712	FAD-binding Berberine family protein [Theobroma cacao]	"UDP-N-acetylmuramate dehydrogenase activity"	-	"Reticulineoxidase."
Ai02g34572	p3	(TCT)5	15	31	45	hypothetical protein POPTR_0009s12400g [Populus trichocarpa]	"biological_process"	-	"Acidphosphatase."
Ai02g34619	p3	(TCC)6	18	66	83	-	-	-	-
Ai02g34631	p2	(GA)6	12	65	76	-	-	-	-
Ai02g34643	p3	(GCC)6	18	726	743	hypothetical protein PRUPE_ppa000196mg [Prunus persica] gb|EMJ26668.1| hypothetical protein PRUPE_ppa000196mg [Prunus persica]	"flower development"	-	-
Ai02g34653	p6	(TGGCGA)8	48	172	219	-	-	-	-
Ai02g34661	p6	(GAAATC)5	30	398	427	hypothetical protein POPTR_0002s16800g, partial [Populus trichocarpa]	-	-	-
Ai02g34686	p3	(GTT)5	15	313	327	-	-	-	-
Ai02g34712	c	(CAA)5gcgcagcaaaatcaacaaaat(CAA)5(CAG)6	69	69	137	hypothetical protein ARALYDRAFT_899603 [Arabidopsis lyrata subsp. lyrata] gb|EFH62151.1| hypothetical protein ARALYDRAFT_899603 [Arabidopsis lyrata subsp. lyrata]	-	-	-
Ai02g34712	c	(CAA)7aatcaacaaaacccacaacagtctcagcagcagcaacaacagcaaacaa(CAG)5	85	331	415	hypothetical protein ARALYDRAFT_899603 [Arabidopsis lyrata subsp. lyrata] gb|EFH62151.1| hypothetical protein ARALYDRAFT_899603 [Arabidopsis lyrata subsp. lyrata]	-	-	-
Ai02g34755	c*	(CAACAG)5(CAG)8*	51	457	507	Uncharacterized protein isoform 2 [Theobroma cacao]	-	-	-
Ai02g34756	p1	(A)10	10	115	124	hypothetical protein PRUPE_ppa018338mg [Prunus persica]	"intracellular"	-	-
Ai02g34761	p3	(TCC)6	18	91	108	beta-fructofuranosidase [Citrus sinensis]	-	-	-
Ai02g34764	p3	(GGT)5	15	466	480	Zinc finger C-x8-C-x5-C-x3-H type family protein, putative [Theobroma cacao]	"leaf senescence"	-	-
Ai02g34786	p3	(CTC)5	15	530	544	-	-	-	-
Ai02g34797	p2	(AG)7	14	1	14	-	-	-	-
Ai02g34798	p3	(CAG)6	18	364	381	-	-	-	-
Ai02g34823	p2	(CT)6	12	7	18	Subtilisin-like serine endopeptidase family protein [Theobroma cacao]	-	-	-
Ai02g34825	p3	(CGG)5	15	254	268	Glycosyl hydrolase family protein with chitinase insertion domain [Theobroma cacao]	-	-	-
Ai02g34856	p3	(TCC)7	21	77	97	hypothetical protein POPTR_0002s23650g [Populus trichocarpa]	-	-	-
Ai02g34857	p3	(ACG)7	21	286	306	smad nuclear interacting protein, putative [Ricinus communis] gb|EEF28784.1| smad nuclear interacting protein, putative [Ricinus communis]	-	-	-
Ai02g34862	p3	(TGG)8	24	180	203	-	-	-	-
Ai02g34868	p3	(TTC)5	15	28	42	Pectinesterase-2 precursor, putative [Ricinus communis] gb|EEF46613.1| Pectinesterase-2 precursor, putative [Ricinus communis]	"negative regulation of catalytic activity"	"Pentose and glucuronate interconversions"	"Pectinesterase."
Ai02g34874	p3	(TTC)5	15	100	114	-	-	-	-
Ai02g34890	p3	(GCC)7	21	33	53	hypothetical protein PRUPE_ppa011655mg [Prunus persica]	-	-	-
Ai02g34916	p3	(GGT)5	15	106	120	-	-	-	-
Ai02g34920	p1	(A)10	10	230	239	-	-	-	-
Ai02g34941	p6	(TGGTGC)5	30	149	178	-	-	-	-
Ai02g34958	p3	(GTG)11	33	17	49	-	-	-	-
Ai02g35047	p3	(ATG)6	18	53	70	hypothetical protein ARALYDRAFT_494746 [Arabidopsis lyrata subsp. lyrata] gb|EFH41746.1| hypothetical protein ARALYDRAFT_494746 [Arabidopsis lyrata subsp. lyrata]	-	-	-
Ai02g35052	p3	(AAT)8	24	229	252	MYB domain class transcription factor [Theobroma cacao]	"DNA binding"	-	-
Ai02g35058	p3	(TAA)5	15	258	272	hypothetical protein POPTRDRAFT_554508 [Populus trichocarpa] gb|EEE78639.1| glutaredoxin family protein [Populus trichocarpa]	-	-	-
Ai02g35063	p1	(G)10	10	101	110	PREDICTED: chorismate synthase, chloroplastic-like [Glycine max]	"chorismate synthase activity"	-	"Chorismatesynthase."
Ai02g35078	p3	(CCT)5	15	113	127	Hydroxyproline-rich glycoprotein family protein, putative [Theobroma cacao]	-	-	-
Ai02g35087	p2	(CT)7	14	257	270	Single-stranded nucleic acid binding R3H protein, putative isoform 2 [Theobroma cacao]	-	-	-
Ai02g35095	p3	(TGG)5	15	409	423	PREDICTED: uncharacterized protein LOC100247751 [Vitis vinifera]	-	-	-
Ai02g35148	p5	(GGCGT)7	35	41	75	-	-	-	-
Ai02g35151	p6	(CCATAG)7	42	186	227	unknown [Medicago truncatula]	-	-	-
Ai02g35161	p3	(CGC)9	27	224	250	predicted protein [Populus trichocarpa] gb|EEE80502.1| hypothetical protein POPTR_0002s13850g [Populus trichocarpa]	-	-	-
Ai02g35257	p6	(AGATGG)6	36	11	46	FtsJ-like methyltransferase family protein [Theobroma cacao]	"rRNA processing"	-	"23SrRNA(uridine(2552)-2{prime}-O-)-methyltransferase."
Ai02g35266	p3	(GAA)6	18	289	306	Uncharacterized protein TCM_009543 [Theobroma cacao]	-	-	-
Ai02g35270	p3	(ATG)7	21	3	23	-	-	-	-
Ai02g35350	p1	(A)10	10	92	101	-	-	-	-
Ai02g35355	p2	(GA)14	28	268	295	-	-	-	-
Ai02g35374	p1	(A)10	10	75	84	-	-	-	-
Ai02g35422	p4	(ACGC)10	40	64	103	-	-	-	-
Ai02g35424	p3	(TCC)5	15	93	107	-	-	-	-
Ai02g35538	p2	(AG)6	12	25	36	-	-	-	-
Ai02g35568	p3	(TGA)5	15	149	163	dimethylaniline monooxygenase, putative [Ricinus communis] gb|EEF52854.1| dimethylaniline monooxygenase, putative [Ricinus communis]	-	-	-
Ai02g35640	p3	(ATC)5	15	151	165	-	-	-	-
Ai02g35668	p1	(A)11	11	55	65	-	-	-	-
Ai02g35679	p3	(ATA)9	27	86	112	HXXXD-type acyl-transferase family protein, putative [Theobroma cacao]	-	-	-
Ai02g35698	p3	(TGA)5	15	347	361	hypothetical protein VITISV_033745 [Vitis vinifera]	"peptidase activity"	-	"RNA-directedDNApolymerase."
Ai02g35717	p3	(GAA)5	15	111	125	-	-	-	-
Ai02g35774	p1	(A)12	12	60	71	-	-	-	-
Ai02g35807	p2	(AG)6	12	89	100	-	-	-	-
Ai02g35832	p3	(AAG)7	21	59	79	-	-	-	-
Ai02g35906	p3	(GAA)5	15	100	114	-	-	-	-
Ai02g35979	c	(AAG)5gaatggaagaagaaaaga(AAG)6	51	28	78	-	-	-	-
Ai02g35989	p3	(TGA)5	15	53	67	-	-	-	-
Ai02g36048	p3	(GAA)5	15	155	169	-	-	-	-
Ai02g36159	p3	(AGA)5	15	185	199	-	-	-	-
Ai02g36171	p3	(GAT)9	27	28	54	-	-	-	-
Ai02g36192	p3	(AAG)7	21	101	121	-	-	-	-
Ai02g36206	p3	(GAA)6	18	268	285	-	-	-	-
Ai02g36238	p2	(AG)6	12	98	109	-	-	-	-
Ai02g36273	p1	(A)10	10	83	92	-	-	-	-
Ai02g36286	p6	(AGAGAA)5	30	48	77	-	-	-	-
Ai02g36287	p3	(AAG)5	15	76	90	-	-	-	-
Ai02g36299	p3	(GCA)7	21	53	73	-	-	-	-
Ai02g36320	p3	(ATC)7	21	36	56	-	-	-	-
Ai02g36421	c	(AAAGC)6aaattgaaggaaccaaagttgtacagatcatcatcatcataaa(CAT)5	88	53	140	-	-	-	-
Ai02g36465	p3	(GAA)5	15	73	87	-	-	-	-
Ai02g36480	p3	(AAT)5	15	157	171	-	-	-	-
Ai02g36480	p3	(AAC)5	15	280	294	-	-	-	-
Ai02g36515	p4	(AAGA)7	28	140	167	-	-	-	-
Ai02g36532	c	(AAG)5tatatga(TGG)6	40	122	161	-	-	-	-
Ai02g36536	p3	(AGA)7	21	6	26	-	-	-	-
Ai02g36537	p3	(TGA)5	15	243	257	-	-	-	-
Ai02g36613	p1	(A)10	10	59	68	-	-	-	-
Ai02g36635	p6	(AAGAAA)6	36	254	289	SAUR-like auxin-responsive protein family [Theobroma cacao]	-	-	-
Ai02g36661	p3	(AAG)6	18	159	176	-	-	-	-
Ai02g36742	p3	(AAT)6	18	130	147	-	-	-	-
Ai02g36853	p5	(AGAAG)6	30	318	347	-	-	-	-
Ai02g36894	c	(ATC)6atgatcatcatcatcatta(TTG)5	52	49	100	-	-	-	-
Ai02g36929	p1	(A)10	10	133	142	-	-	-	-
Ai02g36937	p1	(A)10	10	9	18	-	-	-	-
Ai02g36977	p1	(A)11	11	166	176	-	-	-	-
Ai02g37011	p3	(CAG)5	15	22	36	-	-	-	-
Ai02g37041	p3	(TGA)5	15	54	68	-	-	-	-
Ai02g37044	p3	(GCA)6	18	3	20	-	-	-	-
Ai02g37160	p3	(GAA)7	21	184	204	-	-	-	-
Ai02g37242	p1	(A)10	10	157	166	-	-	-	-
Ai02g37246	p2	(AG)7	14	242	255	-	-	-	-
Ai02g37262	p3	(GAA)5	15	27	41	-	-	-	-
Ai02g37279	p3	(CCT)5	15	121	135	-	-	-	-
Ai02g37371	p3	(CAG)7	21	58	78	-	-	-	-
Ai02g37413	p2	(TC)6	12	207	218	-	-	-	-
Ai02g37423	p3	(ATC)10	30	73	102	-	-	-	-
Ai02g37431	p3	(TGG)5	15	14	28	-	-	-	-
Ai02g37442	p3	(AAG)6	18	200	217	-	-	-	-
Ai02g37545	p3	(TGA)6	18	150	167	-	-	-	-
Ai02g37552	p3	(GAA)8	24	16	39	-	-	-	-
Ai02g37561	p3	(TGG)6	18	146	163	-	-	-	-
Ai02g37584	p3	(AAC)6	18	92	109	-	-	-	-
Ai02g37628	p3	(GAA)6	18	76	93	-	-	-	-
Ai02g37668	c	(TAA)6(TGA)8	42	48	89	-	-	-	-
Ai02g37690	p3	(AGA)5	15	48	62	-	-	-	-
Ai02g37719	p2	(GA)16	32	142	173	-	-	-	-
Ai02g37764	p5	(ATCAA)5	25	84	108	-	-	-	-
Ai02g37783	p3	(CTA)9	27	23	49	-	-	-	-
Ai02g37802	p1	(A)10	10	134	143	-	-	-	-
Ai02g37809	p3	(ATG)6	18	1	18	-	-	-	-
Ai02g37814	p3	(AGC)5	15	189	203	-	-	-	-
Ai02g37825	c	(GTCG)6gtcagaatgtgttgttcactggcagccagct(AGCC)7	83	80	162	-	-	-	-
Ai02g37994	p1	(A)10	10	122	131	-	-	-	-
Ai02g38077	p3	(AAG)5	15	890	904	predicted protein [Populus trichocarpa]	"peptidase activity"	-	"RNA-directedDNApolymerase."
Ai02g38114	p2	(AG)9	18	143	160	-	-	-	-
Ai02g38227	p3	(TGA)7	21	87	107	-	-	-	-
Ai02g38237	p3	(GAA)5	15	96	110	-	-	-	-
Ai02g38268	p4	(AGAA)8	32	240	271	-	-	-	-
Ai02g38293	p1	(A)11	11	134	144	-	-	-	-
Ai02g38309	p3	(TGA)8	24	411	434	hypothetical protein VITISV_037275 [Vitis vinifera]	-	-	-
Ai02g38326	p3	(GAA)5	15	55	69	-	-	-	-
Ai02g38328	p1	(A)13	13	56	68	D-aminoacid aminotransferase-like PLP-dependent enzymes superfamily protein isoform 2 [Theobroma cacao]	"branched chain family amino acid biosynthetic process"	"Pantothenate and CoA biosynthesis"	"Branched-chain-amino-acidtransaminase."
Ai02g38347	p3	(TGT)5	15	264	278	-	-	-	-
Ai02g38355	p2	(GA)12	24	71	94	-	-	-	-
Ai02g38357	p3	(AAG)7	21	461	481	hypothetical protein VITISV_017217 [Vitis vinifera]	-	-	-
Ai02g38364	p3	(AAG)6	18	119	136	-	-	-	-
Ai02g38370	p3	(GCC)7	21	31	51	-	-	-	-
Ai02g38397	p3	(CAG)5	15	90	104	conserved hypothetical protein [Ricinus communis] gb|EEF43049.1| conserved hypothetical protein [Ricinus communis]	-	-	-
Ai02g38427	p4	(AAAC)5	20	527	546	-	-	-	-
Ai02g38428	p1	(A)12	12	28	39	-	-	-	-
Ai02g38470	p1	(A)10	10	58	67	-	-	-	-
Ai02g38493	p4	(CAGT)8	32	51	82	-	-	-	-
Ai02g38622	p3	(AGA)8	24	59	82	-	-	-	-
Ai02g38675	p3	(ATG)7	21	1	21	-	-	-	-
Ai02g38676	p1	(A)10	10	75	84	-	-	-	-
Ai02g38678	p2	(AG)11	22	147	168	-	-	-	-
Ai02g38713	p1	(A)10	10	89	98	-	-	-	-
Ai02g38764	p2	(AG)6	12	9	20	-	-	-	-
Ai02g38966	p1	(A)10	10	108	117	-	-	-	-
Ai02g39038	p3	(ACG)5	15	9	23	-	-	-	-
Ai02g39061	p3	(TGA)7	21	414	434	polyprotein-like [Solanum chilense]	"peptidase activity"	-	"RNA-directedDNApolymerase."
Ai02g39120	p5	(CTCAT)5	25	161	185	-	-	-	-
Ai02g39186	p3	(GAA)5	15	76	90	-	-	-	-
Ai02g39224	p3	(GAT)5	15	127	141	-	-	-	-
Ai02g39318	p3	(TCG)6	18	171	188	-	-	-	-
Ai02g39363	p3	(AGA)6	18	33	50	-	-	-	-
Ai02g39377	p1	(A)10	10	112	121	-	-	-	-
Ai02g39382	p1	(A)10	10	352	361	-	-	-	-
Ai02g39392	c*	(AG)7(AGAA)7*ggggaaacccagaagaagaaagagaagaaaaagagaagggagaaaagagagagaaggaaat(AAG)7	122	77	198	-	-	-	-
Ai02g39414	p3	(AAT)7	21	202	222	-	-	-	-
Ai02g39438	p3	(AAG)11	33	127	159	-	-	-	-
Ai02g39484	p1	(A)10	10	61	70	-	-	-	-
Ai02g39487	p1	(A)11	11	11	21	-	-	-	-
Ai02g39541	p3	(CCA)6	18	208	225	-	-	-	-
Ai02g39558	p1	(A)10	10	113	122	-	-	-	-
Ai02g39581	p4	(AAAG)8	32	91	122	-	-	-	-
Ai02g39666	p6	(TGAGAT)5	30	63	92	-	-	-	-
Ai02g39713	p3	(CAG)5	15	27	41	-	-	-	-
Ai02g39754	c	(TCA)6atttcaattccc(TCA)5	45	305	349	-	-	-	-
Ai02g39762	p3	(ATG)5	15	1	15	-	-	-	-
Ai02g39767	p3	(AGA)5	15	42	56	-	-	-	-
Ai02g39774	p1	(A)11	11	75	85	predicted protein [Populus trichocarpa] gb|EEE97217.1| hypothetical protein POPTR_0011s00510g [Populus trichocarpa]	-	-	-
Ai02g39787	p3	(ATC)6	18	82	99	-	-	-	-
Ai02g39801	p3	(AGA)5	15	317	331	-	-	-	-
Ai02g39898	p3	(AAG)13	39	131	169	-	-	-	-
Ai02g39922	p3	(AAT)5	15	499	513	PLATZ transcription factor family protein, putative [Theobroma cacao]	-	-	-
[truncated: 101 more rows]
