# Supplementary material for: Comprehensive analyses of genomes, transcriptomes and metabolites of neem tree
Source: PeerJ. 2015 Aug 6;3:e1066. doi: 10.7717/peerj.1066 (PMC4540028; doi:10.7717/peerj.1066)
Supplement: Table S16 [file peerj-03-1066-s016.xls]

## Sheet: Sheet1
Supplementary Table 16: The list of polymorphic SSRs among 3 genotypes
SSR ID	SSR type	SSR	Size	Sequence with 200 nts upstream and downstream of SSR motif
G1_V2_SSR_46433	p3	(GAA)9	27	ATGGGATGAAACTTGGACTACAGTGAGAAGCAAGGAAAGCAAAGAGCTTGGAGTGTCATCTGGTAATGAGATCTCCAGTAGTGGTGGGGCTGCTGCAGACACTGAAGAATATTTCAAGGATGATGTTCCCGATGAATTATTCATTAGAAATAGCGAGATAAATACTAGCAGTAGAAACAACAGCAGCAGCAGCACGCATGAAGAAGAAGAAGAAGAAGAAGAAGAATTAGAAGAATTAGAATGTAAATTTGCGAATGATATATTATTATGTAGAAATCTTGCTCTAATGAATAATAATAATAAAATTATGTTTTCTAATTCTACAATTGCATGCTTTGAAATTGGAGCTCAATCTCACTTTCTTTTTCTGGTCTACGTACCCTTTGAGTTTCTCCAAGA…
G1_V2_SSR_37419	p2	(AT)9	18	CGGCAGAAGGAATGGTTGGCGCTATTGTTGGAGATGATGGGATGAAAACAAAAGGGTTTACAACTGCATGGAGTTACGTGTGAAAATATAGAACAGAGTTAGTTAATTATGGTATAACAGTTGTGGAATTTGCAGTTTTTTAGTTAAATGTTTCAAATTTATATCATTAATCCAAAACAAAAACATTTTTCATAATTTCATATATATATATATATATNNNNNNNNNNNNNNNNNNNNNNNNNNNNNNNNNNNNNNNTGTTGAATTGAAGTTTTGTGTTTGGTCCAATATTTAAACAAAAATTTTAATTTTAATTTAAGTCAAACTCTGAAAACAAGATATTATGTAAATAAAAATTTGATGAACTCATGAATGTTAACTGGTCTAATTGGTCTATGTCG…
G1_V2_SSR_4060	c	(ATTT)5tatgtatggtagatgatttcatcaa(T)12	57	TGAAATGGGGTCATATATGGATTTGGTGTTGAATGGACGATCCAATTGTCCACATCCATTTGACAATACACTCTTGATTCTCTTGTGTTGGGCCGTCCTACGGGATTTTCCAGTTCTTGTGGGACATTAAATCGATTTGACCTTCCCCACCAATATCCACCAGTACTAATCTTTCGAGGCAAAGATATCAACCGTATTCATTTATTTATTTATTTATTTTATGTATGGTAGATGATTTCATCAATTTTTTTTTTTTAATATTAGTTTCACTTGTATTGCGTCATAGCCGACTTTCTTAAACTTATCTCATCCATTTATTATTTTTTTTGTGGTAGAATCTATCAAAGTATTCTTATATCAAATACAGGCAATTAGTACAAGTTAAATTCAGACCCTTTG…
G1_V2_SSR_64675	p3	(TTA)5	15	AAATGATAGCAATAACAGTAATAATGATAAATTTTATTTCTGGAACTTGCTTATGAAAACTTGAATACAATAATTTTGCATTTAATGCGTATGAGTTGCTCATATGCTGCTATATTCTTAGCTTCAAATAGTTATTTAATTCTTTTCCGACCTTCATTCAACCTTTTGGAGACGGGAATCAAATTCTCTATATCCAACTTTATTATTATTATTANNNNNNNNNNNNNNNNNNNNNNNNNNNNNNNNNNNNNNNNNNNNNNNNNNNNNNNNNNNNNNNNNNNNGGGATAAATCGTTCTCAGAAAAAACTAGTTTATAAAATAATAATAAAACGATTCTATTCGTCCATTAATTTGTTTTTTAGTCAAAAAATACATTAAAAAGAATTAAACTCCACCTAT…
G1_V2_SSR_61563	c	(AT)7aacatatgtacacattttctaatatcaaaacagtaactatatcctattatttacattctattccattcaatttagttttaattttataatta(TATG)11	150	CTCATTGTTTTTACTTTTGGCCCTGCCCAATATAAAGAAAAGCAACCATACCACGTTATTTAATTACTGTTTCTTTTATTTTAGTTTTAAATTTTATCATATAGTAACATAGTTGCACTGTTTCTAATGAGGCCCAGCCTAATATTAAAACAGTAACTAAATCATACTATTTAGTTACTATTCCTTCATTTAGTTTTAAATATATATATATATAACATATGTACACATTTTCTAATATCAAAACAGTAACTATATCCTATTATTTACATTCTATTCCATTCAATTTAGTTTTAATTTTATAATTATATGTATGTATGTATGTATGTATGTATGTATGTATGTATGTATGTAGGCACTTAAATGTCTATAATTTGGAGATTTATCATTATAAAGTAGACT…
G1_V2_SSR_50153	p5	(GGGAA)8	40	AAAAAAAATTC*AACGT*CCAATTGGAAGGACGCATCCAGCCTTAGGTCCTTGCATGCTGCGACTAGAATAGGAATAGCAATAACTTTAGCCGGATTCAAATTAAAATTCAAAATATATGTATATATTTCCCATGATGTAAAGTGATATCAACGGTACAAAACGGATCTTTAAATCCATCCAACGGTGGTGGGGCTGTGGGGAAGGGAAGGGAAGGGAAGGGAAGGGAAGGGAAGGGAAACTGGCTGAAGAAAGAATCCCATGTGACTTGTGGGTTGAGACTTTGACGCAGCTTCCGGTGTCCGGTAAAAGAGGAACTTCTGGTCCCACAACCCCACCTCTTCACTCAATGACTTTTGTCATTAAAAGCTGTTAAAGGTCAACTCTACCTCACTGTCCC…
G1_V2_SSR_47279	p2	(TA)11	22	GTCGCATATCTGTAGGCAATGGCCATCCATACCTCAAATGGGAACTGTGTCAAGGTTGAAATTTCCAAGTCAATACCTACTTTTGATTTTATTTTGCTGTCTACTTACATCATGTTAAAGCTATTAAGATAAATTGACGATTATAGCTAATTAGTGGTGCGTCTATTATCTTTTTCATTTTTGAGTTGATTAGATTTGTTATATATATATATATATATATAGTTTTTAATTCTTCAAACCCTTGTGTGATTCCTTCTTCATTGTATATTTTTTTTGTCTTTGTTAATGTATTTGGTATAAGCTTTTGTTTAGAGTTTATTTAAAAATATATATATATTGGAATCCAAGAAGAGTTGAATAACTATTGGAGATTTTCTACGTTAATTAAAATTGAAATTT…
G1_V2_SSR_37043	c	(TTA)7ttgttgttgttgattgtagtgtggattaaaagtgcagcttataa(AAAT)5	85	TTTTTATTTTTCATAGGAAAAAGAATGGCGTGGGGACAAGTGACAAAAGACTTTTGGGTTCAAAAAGGATGAATGTAAAGGTGGGGAGATTTGCCCCTTCCCAAAACCTGAGAATCTAAGCAAAAAAGCTACTACTATATCCATCCTTATCACCATTAAAATGAAAAAGAAACGCAAGAAAATCTAAAGGATATTGTTGTTATTATTATTATTATTATTATTGTTGTTGTTGATTGTAGTGTGGATTAAAAGTGCAGCTTATAAAAATAAATAAATAAATAAATAAGTAAGAAAAAGACGAAAAAGGGTCCACAAAATTAATGTTACATGCCAATAACAGAGTGCCCCGCCGGAAGCAGCTTTTCTTATGTCGCCTTGCCTTTTCTGTACTTCCTCAAC…
G1_V2_SSR_30940	p2	(AT)8	16	TGAGGGAGAAGAATCAAGTGCTTTACACATAAAATTCACACTCGAGTGAATTGATCGATGGTGATAAAATATTGTGGAAAAGAAGGGAATGTCCCAAGGTGACACCAAATACAACTTTTTTGAATAAATCGAATGATTCGAATTTTTATTCGAAAATGAAGGAACCAAGATTAGATTTTATGCTTGTATGAACTAATACATATATATATATATATNNNNNNNNNNNNNNNNNNNNNNNNNNNNNNNNNNNNNNNNNTAATTAGTTGTTAAGTAAATAAAACACCGAATCCCAATTCAATCTTGACATTTGCACAAAGAAAAGGGAAGGGAATGAATCATCAACAACTGTATGTTTAATGACTACTAATATGTAATACGACGTATCTTGAAAAGGAGAAG…
G1_V2_SSR_25838	p2	(AT)10	20	ACCTAGCTAGCCACTCCGCTACTTTTAATTTCCACTTGGCCACACCACATGCTATAGCATCTATTCGATTACAAAAACTGAAGTATTTGCATTACTAACAAAGCAGAAAATTTGTTTAATAAATACAACAAATTAAGCATTAATAATTACTACTGTTTTGTATACAACAAGGTTGAGACACACACATACATATATATACATATATATATATATATATATNNNNNNNNNNNNNNNNNNNNNNNNNNNNNNNNNNNNNNNNNNNNNAGTCAGAGTAGTGTCGTTGTAGCTTTGCATGCATTATATTTTTATATATGTATTCTTAATTAAATAGGCAATAAATGAGTGATTGGATATGGGCAGTTTTCTATCATATTATTCCTCAGTGTTGAGACAGCAAAG…
G1_V2_SSR_22268	c	(TAA)5g(AAT)7	37	TGGAGTTATTTATTCTTATTTTTTGGGTAATGACATTCAATTTCTCGAATTTTACATTTTTTTAAATAGGATTATGGTTTATTCATTCACATTAATCAAATCTTTGACTCCCTATTGAAACAACCAAATTCTCCTTATGATGTTAGAATTTTGTGTTTATGAGTCACAATTAAAAGTACTTACTGCTTTTCTCGAAAATTAATAATAATAATAAGAATAATAATAATAATAATAATTACTGCTCGTGTATTATAAACTTTTTTACTATTAATTCAAAACTCTTCTCAAATTTTTGTTGGGTGTTTAGTTGTTAGAGGTAAGAGAATTAAGGAGAGTTTAAAAACTATTTTATTTCCATTTGTCGAAACGCAAAATTTAAGATTTTAGTATTGGAGTTTT…
G1_V2_SSR_37711	p2	(AT)9	18	TAGAAAAGAAAAAGAAGACTCGACGAGGCTTCACTATTTTTAGTTTTCTCCAACTTAATTCCTTACTTATTAGGTTTTTATTTGATGATCTCTGTAAAAACAACTAAAACTGTCCGACGAAATTTAATTTGAATTATCTTGGAAAACTACTCATCCCTTCTTCTCTTAAAAGTTTCCAAATTAAATCAGAATGATGTGCATATATATATATATATATANNNNNNNNNNNNNNNNNNNNNNNNNNNNNNNNNNNNNNNNNNNNNNNNNNNNNNNNTATATATAATATTTAGAAAAGGATAAATTTTTAAATAACCTCAAAATGTTTTAACAACATTTAATTTATTCCCAATATTTGTAAATATATTCATCCCACCTCTAAACCGCCAACCTTACGCAGCC…
G1_V2_SSR_13335	c	(TTA)5ttgaatagttatataacagatattaattgtcagaaaagttgagatcatgatatatataa(AT)7	88	TCTTTCATTTCTTCATTGATAACGACATTTAACTGTTGAATTAGTTTAGACCATTCTATTTGATTATCTAGCTTAACAACTCACAGGATAATTTATAGTTAACAAGACCCCAGTTGACCCCCAACTTGCCAAGAAGAAGACAAGGAAAAACGAAGGTAAATGGGACTACGAAATCTTCCCCATATTTTTGTCACAACTGTTATTATTATTATTATTGAATAGTTATATAACAGATATTAATTGTCAGAAAAGTTGAGATCATGATATATATAAATATATATATATATNNNNNNNNNNNNNNNNNNNNNNNNNNNNNNNNNNNNNNNNCAAATTGCAATGAGCATATTCTCTATTATTCATAGAGAATAAAAGAAGAAATGTACAGGCATGTATACTAGT…
G1_V2_SSR_25799	c	(AT)11ttgaaagattctagtgccaccatatactccattgatatagcactagcttgtaatgcttttccatgtgtttctgctt(TA)10	118	CCTTATTGAATACTAATTGAATAGTGTTCAAAGATAGTCCCCACTTTGAAACTCATTGAACATATTTTCTCTACTTTTTATTTTTATCTTTTCTTTCAAACTCCATCCGCTGTTAATCAATGCACAAAACTGTACATACACTTGAACACAAAACATTGATCAAGACAATTATAATTATCGTTACTTTGGATAAAACAACATATATATATATATATATATATTTGAAAGATTCTAGTGCCACCATATACTCCATTGATATAGCACTAGCTTGTAATGCTTTTCCATGTGTTTCTGCTTTATATATATATATATATATATGTATACTTTTTCCTAGTTGCATTCTTATCCTGACAAAGAAGGTATTGGGTTGATATTCAATCATAAACTTGTTTCTTATCT…
G1_V2_SSR_15354	p2	(AT)9	18	GACAAAATAAGGTGTGCTACGACAAAACAAACTCACTTTTTCTTCAAAGGTGTTCTAGGACAAAATAAGATGTTTTAAGATAAAACTGTCTACTTTTCCCTCCAAAGATGATGACAACCTTCTAATTTTATGATTTGTACAACACCAATACCTCACAATAAAAATAATATAAAATTAAATATTAATATGTTAAATAGCAATATATATATATATATATGTACGTATGTATATAGCCAATTGTCTTTATCGTAGAACATCAATGAGCAATAAAAATTCATGTTATCAAAAGATTTCCAGCAATTATATATAAAATATAATCTACTAAAATTAGTATATAATTTTTAAGAGAACTATATACAACTATGTTGCAATCAAATTGATTAAGATCGTGTGTACATA…
G1_V2_SSR_37672	c	(AAT)9annnnnnnnnnnnnnnnnnnnnnnnnnnnnnnnnnnnnnnnnnnnnnnnnnnnnntttggttgaaga(AT)7	108	ACATATGCTTTTAGATTGATGTAGCATGCACGGAAAAACCATCATGGTAGAACAAGTGGTAGGATACTTGTCTATTTACCATATAATTTGACAGAGACACGTATTTTACCTTAGCCAATATTTCAAATTTCAATTGAGGTAGGAAATAATCTATACATATGTAGCTTTAATTTTGGCTAATTAGCTAGCTAGGGTAGCAAATAATAATAATAATAATAATAATAATANNNNNNNNNNNNNNNNNNNNNNNNNNNNNNNNNNNNNNNNNNNNNNNNNNNNNNTTTGGTTGAAGAATATATATATATATAATAGAAAGGATATATCATATCAACGTACACTAACCAAATCTTTTTGCTTGATCCCCCAAAATTGCTCTTGTTGGCTGTTGCTTGTAGCCTA…
G1_V2_SSR_36289	p2	(TA)9	18	CCAAATTTTACATAACATAAATGACAAGATAAATTACATTAACATTGATATTAATTGGCCAACAATTCATGTGGAATTGTCATTTTTCACACATGGGATATTTCATTGGTTCACATTGAATTATTTATTTATTTATTGCATGCCCATTTAGTGTTGTCAAATACTTCCCCTGATGAATTTATAATTTGTGAATAAATATTATATATATATATATATATNNNNNNNNNNNNNNNNNNNNNNNNNNNNNNNNNNNNNNNNNNNNTAGATTGTAGAAGCCCCGAAATTTCCCACGTGGGTGCTTATATGAGGTGTACCACATAAAATTCATCCTCCTTGAGGTGTCATAAATGTTGGAACATTGGATTATTATCTATTATATCTATATATATATATATTTTT…
G1_V2_SSR_7006	c	(A)10gtcattttttctaattttactttaaaaatcttttgtt(TA)8	63	ATAATTTTTAATCATTAAGACAAGACTTTACTAAATATTAGGTAATTCAATATATATATACATATATATATTTAGATAGGATTTTGAGTGTTTAAAAATGAAAAGTAAAAGAAATTTGAGAAAGCACGTTCGTTTAAATTCCTCTAAACTTTATCCAAAAACAATTGCTGGACAGAATTTGTAAAGTTAATGTAAAATTAAAAAAAAAAGTCATTTTTTCTAATTTTACTTTAAAAATCTTTTGTTTATATATATATATATATTCTCAATTTTAAAATGTTAAAATATTTCATTTATGATATTTATTCTAATTAATTATCCCTAAAAAAAATAGAAATTTATCTTTAATTATTTCTTTGCTCTCTCTACTCATTACTTATTTATCTTTTAAAAGTTTTT…
G1_V2_SSR_3557	p2	(AT)10	20	AATACCTTCACTGGCTAACAGTCCATCTCTGTTTTATACTATTCATCATCAAACTGTTTTACAAGTTTCATGATAAATATTCTCAAAGAATTTCCTAGCATTAATCTCGCTAGTATCAACTTTTATCTGATATTGATCATGCATCTTATCTATTATTATCATGTCATCATTTTAAAGTAATTTGTGATAATTATATTCAATATATATATATATATATATTTCAGACCTCGACANNNNNNNNNNNNNNNGACCTCGACACCCTATTAGTTTTACTTGGTATCACCTCCCTAATATTTTAAACATACCTGGTTACCCCTTCGACATTATCTCAATTAGTAATAAAAATAATTTTTTAAAAACATGTAAAAAATACCCTGTGAGTAGAAAAATAGTATCTTT…
G1_V2_SSR_3139	p2	(AT)9	18	CATGAATAACAATTACCTGACATGCTGCCAAACTCAAAACTACAATTTCGAGCTTAAGAAAATTTTGAGCAAGCCTAAATTTTTTTCCTTTATGCCGAACTCGAAAACTCGAGACAGCAATTTTGAGTTTGGCCAAAAAAGGCTTGCTCGAAACTCTATTTTGCCAAACACGATATAAACTATAGTTTTGAGCAAGCCAATATATATATATATATATCTGTTTTATTAACATCTATGCTATCATATATTGCTATAATTGTAAATTCACAATGCTCGCACGACACTTTTCACAAACTTACGATTGCCATATATTTTAATTAGTTAAATGGATTAGAATTAAATTCAATTTTGTAAACTAAAGCGAAGACTATTTATCATGGATAGCCCAAGTATTTATTA…
G1_V2_SSR_65016	p2	(AT)8	16	AAGGGGGGTATTTGCCTATTTATCCAAAAGTTAGGGGGTATCTATCTTTTCTGAAATGTTGGGGAGATATCTGCTTATTAGTGCAAACGTTAAGGGGTATATGTCATTATCTCTAAATTTTATAGAGTACTGAAATTCAATCCTTATTCATTACATGAAGAGGGATCAATAAACCTTTAACTTTACATATTTTTACATAATATATATATATATATTAATGAATTTGCACACTTTTAGTTATTGAAATTATATATGACGTGTGTTTATTATATAATAATTAAATATGTTAAATTTAATTTTAATTGTTTATACTTAATAATTTATAAATGATATAAAAAAATTATGTAAAGTTAAAAGTTATTAATCATTTCTCATGAATATATATGCAGGAGCAGAGCC…
G1_V2_SSR_65186	c	(A)10tgttaatgtg(TA)7	34	TTAATAAAAATAATAAAAAAGAGCAAGAGTGTAAAAGATTTTTATAATCTTAATTATCAATCCATAAATGAAGAATTTAGATATGCTTATGCTTATCTATGTGTAAGAACCGCATTCATTTTATTCAATCAACAAGGTTTTAGGGTTTGCATTATATTGAAATACTGACACTCCTCTCGGAGAAAGGATTAATCATTTGAAAAAAAAAATGTTAATGTGTATATATATATATANNNNNNNNNNNNNNNNNNNNNNNNNNNNNNNNNNNNNNNNNNNNNNNNNNNNNNNNNNAATTTCTTATCCCATTTATAAATTATTAAATCAAACATTTTCAATAATTGATATTAAGTTTATATCATATGTAATTAATATATAATATATGTATTATAATTAATGCAT…
G1_V2_SSR_1411	p2	(AT)10	20	CATACATACATACATATATATATATATATATACATCTAATTGCATATAGTACAGGAAAATATGAATTGTAATTAGTTGTTGATCAATTAGAAATGGTCTAGGGATCGATGCCGGCCTACCTGAATACATAGAGAAAAATACAAAACACATAATTATGAAGGTGCATATATTGAGATGTTTTCAATTCGCTATGATACTAATATATATATATATATATATTCATATATACATCTACAGATTTTGTTTAACTTATATGCATAGAGTATCGATATTCCATTATCTTTTGACGTGTTGATTGCAGTACAGCATATGTTTTAATTCTTAGGCACCACATCCTAGCAATATATAGCAAATGATTAATTAAATTAATCAGAATTTTGGTGTGGCTGAGGCTGATCA…
G1_V2_SSR_27104	p3	(ATC)8	24	ATTTCTTCCATGAAAAGTTAATCTTTCCAGTTTATATATTTTATCAGGTTTAAATTCTTTCATTTTCATTGCTGATTTTGCTTGCTCATCTTAGTTCATCATCATCATTATTTTATTATTGACAGACAGAGACTCTTTCATACATGAAAGAAATTAATCAACGATAATATATGTCTTGCAGATAATATATGTTCTGAAGATCATCATCATCATCATCATCATCTGCAAGACACATTATTGTTAACGGTTGAAACATGATCATCGTCATCATTATTGTTATTATTTTATTATTGACAAGTTCTTGGAGCAGAACATCACATATAAATTAAGACTAAGATATGCTACGGTATTTATAGTGGTCGGACTTTGACTTACAGGCCGTCCCTCTCCCTGTCTTGC…
G1_V2_SSR_59530	p2	(AT)7	14	TTCACTTCATTCAATCGATATTTCCTGGAGGAACCTGGTGGAGCTTCGATGATGATATCGAGGTTAAAATTATGGCGAAACCGGTGACAGTATGGAGGGCGCTTAGTAAAATGTGGGAGTTGGTTGCTAAGGACCGTTGGATTATTATTGCTGCCTTTTCTGCCTTAATTGTCGCGGCGGTGCGTATATATACATATACATATATATATATATANNNNNNNNNNNNNNNNNNNNNNNNNNNNNNNNNNNNNNNNNNNNNTAAGTTTCTTGGCATTGAACAATATCAAATAGTTGCAGATGGAAATAACGAGGTGAGATACGTAAAATTTGGAAATGGATATAGGGTGTATTTGGGAGCTTTGGAGAGAGTGTTTTTAGTAGAATCCTGTTTTGTGAAGG…
G1_V2_SSR_18092	p3	(AAT)5	15	AAATTGCTGCGCCGAATAAAAATCTTAAAATAATAATAATAATAATATTCAGCAATACTTTTCAGTTTTTGTTCTGAGTTCTACTTTCAGATTTTGACTCACGTTTTTCAAGTCTCTTCCTTTTTCTCGTTAGAATCGTGTACGTGACTTCAAAGTTCAAACCTTTTCACACCACAAATCACATCCCATTTTAAACATCAATAATAATAATAATTATTATTATTTATTATTGTTATCAAATTAATTAATCAACCTTCTTTGCCTAACAATTATTCAATTGTTTTTATTTTTTTGAAAAATTATTTTCTTTGGAGTTATTATTATCGCTGTCGTTTTTAAAATGGTTTCCATCAAACTATATATATATATATATATATAGANNNNNNNNNNNNNNNNNNN…
G1_V2_SSR_25465	c	(A)11gaaaaaattagcaccatgattacaaagaaattgaacatgtcttgaagaaattttctagtcttattgaacacgtctttctaattaggtggaacattt(ATTA)7	135	TTTGAATATATGTTATAAAAATAATTAGCTCACCGTTGACATAAAACAAACAAGGCAGAGACGCACACGCCTTGAAGAAATTGAACATTTATTCAGTTCGTCGAAAGGACTAGGTTAGGGAAAACGAGGCTGCTCAAAGAAAAACTTTTAATTAATTAATCAATTAAAAATCTTTTCAGTAGCCAAATGTCAAAAATTTAAAAAAAAAAAGAAAAAATTAGCACCATGATTACAAAGAAATTGAACATGTCTTGAAGAAATTTTCTAGTCTTATTGAACACGTCTTTCTAATTAGGTGGAACATTTATTAATTAATTAATTAATTAATTAATTAATTTTATGTTATTTGTAGTTGAACATACGTATCTGTTAACGTGTCTCCCTCCTATTACGTTTCTT…
G1_V2_SSR_27484	c	(ATA)13nnnnnnnnnnttgtttatgcaat(ATA)9	89	TCTTACATTATTTTGTGAACTCTTAAATATACATATCTCTGATAGTTAAAATTAAATCAAGTAAGTATATTAATTATATATTATTTATATGTATCAAATTTAATCTTAATCATTAAAAATGTTTAAATTTTACCATCAATAAATGATATAAAAATATGTATGATTTTATGAGACGAATGATCCATTCTGTTTATGCAATATAATAATAATAATAATAATAATAATAATAATAATAATANNNNNNNNNNTTGTTTATGCAATATAATAATAATAATAATAATAATAATAATGTAGAAATAAGATAATTTTAGAGAGGGAGAGAGAGGTTGCACTATTGGCTATTTGGATAGTAGTAGGAGTAAGGGAAATAAAATGCATGTGGGACATTTACTCTACAGA…
G1_V2_SSR_61022	p2	(TA)8	16	TCAAAATATTTTCATATTAAATAATTTGAAATTTGATTTGTCGTTAATTTTAATTAATTTTCATATCACTTGTTATATAAGTAGTAGTATTATTTTAAAAAAATTAATTTAGAATAATCTAACATTTAAGATATCTCTCAAGATTTTTCTGGCATACAAACTAGACTAGATTAAATTGGATAAAATGATATAGAATGATTATATATATATATATANNNNNNNNNNNNNNNNNNNNNNNNNNNNNNNNNNNNNNACTCAAGTACAAGATAATTAAATATTTTAGTAATAATTCAAATTTTAATGTTACATATTTGAAAAAACATATATTTATAATTGTAATTTTTAAAATATACAATTTTAGCGATATAAATATATTTATGTTATTAAATAAAAATTCGT…
G1_V2_SSR_3850	p3	(ATT)14	42	TTAAACAAATAATTTGATTAAGAAAAGACTAGATATGATAAGTATAAAATAGAACGAATAATTTTAAAAATATAAAATATCAGTTATCATTAAAACCGATTTCTTTATTAAAAGGATAAATATCATTTTTTTATTTGAAAAATAATGATTTAAATAATTAAAAATAATTACTAGTTATTTTCATAAGATATGTGGTATCATTATTATTATTATTATTATTATTATTATTATTATTATTATTATATTTCTAATTCCCTTTCACTCAAATGAAAGATGCAACAATTTATCTTCTTTAATTAAATTTTTAAATTTTATCTCATTGTTTTAATAATTGATTGATTTATTGATTTATTGATTGGAATAATTTGTCTTTTACATATATAATTTTGTGGGAAAATT…
G1_V2_SSR_64802	c	(TG)7(TA)9	32	ATTGCAGCGAAGCAAAAGAAGAGACCTCAAAATGTGCAGAGAAACGTCGATGATTTGTTTCCGGGTCTGCGACTGAAATACATAACGCCTGATGATTAGAGAGTTCGTTACGTTCGTGATAAGAATTATTAAGATAAACTGTCCAATTTTCTTCATGTGGTTTGTTGTGTAAAACTTAATTCAGGAAATCTAATTTTGATGTGTGTGTGTGTGTATATATATATATATATACTTGAAGCCTTAAACACCAAGTGAAGAGTTGATGCTGCTAATACGGTAGAACTCCTTCCTTGCCTTGAATCTTAGCCTGGACATTGTGTATCGCTTACTACTCTAGAATTCGAGAGCGATGATCTTCCCGATCGATGAGGATCCTCACAAAAATCCACAACTTGATAG…
G1_V2_SSR_2049	p2	(AT)6	12	NGCTCTCTCGCTCTCTCTCTCTATGAGTAAAGGATGTTTTTACTTTTCAGTCCTCGTGTTGGGAGAATTATACACTTAAGTCGCTCACATTTTTAAAAGTCTCACTTTCATGACAATCTTTTAATTCACAATTAAACAACTTAGATTTTGAAAATAATTAGTTCTTTTTTATATCACTCGTGTGTTAGATTAGATTCAAATATATATATATGGAGAATAGCACGAGATTATCTTTTTATTTATACGAGAAAGTGAGCGCTTACGATTAAGTTATTCTCAACTACACCGATTAACATCGAATTTTGTCAAAGGCATGGGAGAAAAAATAGGGGCTGAAATAAAAATATTGAGAAGAAAACAAAAAAGGGCAGGAAGGGAATATCAGTTTACCTCAAAAGA…
G1_V2_SSR_26392	p2	(TA)7	14	ATATAGCTATGTTGACATCACTTCCTACATTAGGTTAGCTTTTGTATAAAGATGTCAAAGTAAACCAAAGAAGGTTGAATGCGTTACTTTAGTGGTATAATCAGTAATATTGCTTATAACCTGATTATAACATTAATTTTATTTATAGTAGTATACAAAAATACACAGCACTTGGATGATATCTATAGTCCCTGGTAGGTATATATATATATATNNNNNNNNNNNNNNNNNNNNNNNNNNNNNNNNNNNNNNNNNNNNNNNNNNNNNNNNNGGGTTGTCCTAGTTATATGATCCATATCTTAAAACAAGAATTTCATCACCATGGTATATATGCCATTGGAGGTCCCAAAGCATGTGGCATTTAAGCTTCTCAATAAGGGGTATTGTGCCTCAAGGGCA…
G1_V2_SSR_34775	p3	(GAA)12	36	GTTTGCCAAAAATTTGGCAGCAAGAATATATATATATATTCTTGGTGCCAAATTTTTGGCAAACAAAGAAATCATAATAGCCAAAATCACAGAAAACAAATAAATAAAATCTATCACAAACTCAAGTAGATTTAAAAAGAAAAGAAAATAAAAGAAAAGAAAAGGAAAGAAAAGAAAAGAAAAGAAAAGGAGAAAGAAGGAAGAAGAAGAAGAAGAAGAAGAAGAAGAAGAAGAAGTGAATGCAAGTGTAATGAAAAGAGTAGGGAGAGGAAGAACATACCAAGAAAAAATTAATTGCAGGGTCGATCTGCTTTCAAATTCACAATGAAGAAACTATTTAAGAATCTTCCTTATTATATTTTATATGTTGTTTATAGTATCTATACATATAAAATATTA…
G1_V2_SSR_51589	c	(T)10ggtcattaagaaattggataataagagtcaatgtgtcataattgatgagggctaattaagcattttcataatttgccgcccaaattttcatatatac(AT)8	123	ATGATTCGCAGGTAGATGACAAATATCAATATTCGTGTGAAAACAAAGATATAAAGGTGCATGGATGGATTTGCACCGATCCGCCTGTTGGCTTCTGGCACATAACACCTAGCAGTGAATTCAGAACTGGTGGACCCCAAAAGCCAAACCTTACTTCCCACGTTGGACCCACCACTCTTTCCGTAAGTAACTCACCTTCTTTTTTTTTTGGTCATTAAGAAATTGGATAATAAGAGTCAATGTGTCATAATTGATGAGGGCTAATTAAGCATTTTCATAATTTGCCGCCCAAATTTTCATATATACATATATATATATATATANNNNNNNNNNNNNNNNNNNNNNNNNNNNNNNNNNNNNNNNNNNNNNNNNNNNTTAATTCATCAATATGAGGGGATA…
G1_V2_SSR_4318	p5	(GAAGA)6	30	TGAAACATAATGTTACGCAATAATATGGTTATTATTTTAATAAAATTGGGGACTTGCTAAATACAAATGAATCAATTATATTCTTATTTCTAAAAGAGTTAAAATTGAAGGACCCGACTGTCATTATTTCATGGAGAAATATTTCAAAGGCTGCCAAGGCGATAATGTTTGTTTACTAGAAAAACCTAAAAAATGAAGGGAAGAGAAGAGAAGAGAAGAGAAGAGAAGACAAGAAGAAATCATCTAGAGAAAAAAGGAAAGAAGTTAGTGGGAAAATTCTTTTCACGCTCAAGTGCAATCCCACCAATTCAAATTATAATGCTTGAACTATTTGCTTCGCGTTAACAAGAAATCTAAATATGAAGGCCCATACAAACACACCTACATACATACATACAT…
G1_V2_SSR_15779	p2	(TA)11	22	ATAATATAGAATGATTTTACATTTTAATTACAAGGTTAAATACATTATTATGTATCTGAAGGTTTATAGAAATAAAATTATGTTCGAACAGCTACTAAAGTTGGTAAGTTACTCTCTCTATAATGTAAGCCAACTATATTCCATTTTGAGAAAGGTAAAGGGTTAAAAATGTATTTAGGTTACGACTCACTCCCTTACCTATATATATATATATATATATAAAAGGACTGATTGAATATATATAATAAATTATTATGTAGCTCAATATTTTTACAAATATATTTACACTCATTTATAAAATATTAAATTTATACACCTTCAATGATTGATATTGAATATGATATATATATATTAATTATGCATTAATTATATAGTCAGATTTAATCTCAACTATTAAAT…
G1_V2_SSR_41353	p2	(AT)10	20	AGACAACATGCATGAGGAGGATTCGAGATTAGCTATGTTTGACCCGCAACACTGCAAGATTTTAAGAGGCATAAACTTCTGACGCGGCTGATCCCACGTAGCTAGGATTCAGGAACACTGGATCAAAAAAGATCAATCCAGCAATATTTGTAATCCAAGTTTTAATTATTTTTGTATACGGCAAATATATAGAAAAAACATATATATATATATATATATTGACGAATTTCTTATATATAACACAATCATTTATTAATATAGAACCAATTTAGAATCTACAAATTCACAATTAACAATAGTTTAAACTATATATTTTAATTGGAAAATATATCTTTTAACCATTAGTATTTGATTGAGTCAATGAACCGATGGATATATATTAATGAAAATGGGTGGCAT…
G1_V2_SSR_53857	c	(AGA)6t(GAA)6	37	CTAGGGTTTTACTTCGATTATTAATAATTTTATAATCGGCGATTATTAATTTATTATTTTTGTTATTAGTATTTAAATATATGCGGATGTAGCGCTATGAGAAAGTGAAATGAGAGAGCGTGGCTTAAGCGTGCCGCGGGTGTTTAAGGACTAGGAAGAAAACGAAGCTGCTGAGA*TTTTTATGACTTCC*AAGTGTTAGAAGAAGAAGAAGAAGATGAAGAAGAAGAAGAAGAAGACGGAGTTTCAATATGATTAAAGAAAAAGATACAGAGACGAGAAGAATCGAGAAACTTGAAATTGGAAGAGCATTTATGTTTTTAGGTTATTCCAGAAATTTCCTGCTCTCGATTTTGCGTTTTATCTACACGTTTTCAGATT
G1_V2_SSR_4319	p4	(TACA)5	20	ACCTAAAAAATGAAGGGAAGAGAAGAGAAGAGAAGAGAAGAGAAGACAAGAAGAAATCATCTAGAGAAAAAAGGAAAGAAGTTAGTGGGAAAATTCTTTTCACGCTCAAGTGCAATCCCACCAATTCAAATTATAATGCTTGAACTATTTGCTTCGCGTTAACAAGAAATCTAAATATGAAGGCCCATACAAACACACCTACATACATACATACATACATACGTACATACATACATACATTATATATATAATATCTAAAATTAACTGGAATTTGGGAATCATGAGTCTTGATTAGGTGAGATCTTTTTATGGCCTTCACTTTGCACTTTGGAGAATTTGACCTTTACTCTCTATTTCGAAGACAAGGGTATCAAGTATTTCAATTAAAGAGTGATTAGC…
G1_V2_SSR_37342	p2	(TA)8	16	ATGATCCTTTCTATTCTATGCAATTTCAACAGTTGTTTGACTTTAATTGTTGAATGATTTTGGTTCTCAAATATAATTTTTTTTTAAAACTATATATGTGATTTTGACATTTATTAGTAAAAAATTCCTCATGCCTCATGCATTAGCATGAAATTAGGTTGAATATTGATCAAATATTGAGCAACCCAAGATTTATATTTATATATATATATATANNNNNNNNNNNNNNNNNNNNNNNNNNNNNNNNNNNNNNNTTAATTAATAATCTTTTGAATCCACGATGAACAAAATCCAAGAATCCATCAAATTTTGGACTTTTTAGCACTTAGGAATTGTTATAATATTTAGTTGTAGAATCTTTATCCTATTATATCAAGCCAGAAGAAGTTGGATGATGAG…
G1_V2_SSR_23492	p2	(GA)9	18	ATTGACATATGTAATTAATGCAGCTTGAGGAAGACATCAAATATAATCTCAACCATTCACATTGTTAGTTTGTTGGCCCACAACCTGTGTGATAATACATGTGATAAAAGTGGTACTATTGATCCTAACCTCATACAAACCAAGCATGCAACATGCAATAGGATATTTAATTTAGAACAAGATAAAAAAAGAAGGAAGTGAGAGAGAGAGAGAGAGAAATCAGGGTATTTCTCAGAATTACTTACTCCCACGGATCGTCTCCAAGGAGAAGGACATCATTCTCCCTGTCGACGAATACAAGCTGCCAGCCTGATCTAAGAGGATCTTCTAACTTCCCCTCGATTCCAAACATCTGAGCCAGTTCTTCTCGCAGCTCATTATAGCTGCTGAACCGGGAGA…
G1_V2_SSR_41146	c	(CA)11(CT)11	44	AAAAGTGAAATACACATTTACAGATATATATATATATATATGTAAAGAAATAATTAGTACATATATAAATAATTGAACCATCAAAAACGGAATTAATAATAAATATTGGAGTTGGATTTATATATGATATCATTGACTAAGCTGCGCAATTTTGGTGTTCGGCGGCCCTACCGTCGGTTGGCCGATTTGTCTATTGCACCACACACACACACACACACACACTCTCTCTCTCTCTCTCTCTCTNNNNNNNNNNNNNNNNNNNNNNNNNNNNNNNNNNNNNNNNNNNNNNNNNNNNNNNNNNNCATATGATTCCAAACCCATTAAAAATTTCTATCATTCATATCTTTAAAACATAGAAAAGAAAACAAACCAAAAGGAAAGGAAAGGAAAGGAAAAGCA…
G1_V2_SSR_19730	c	(ATT)5actaattaatttctataataataata(ATT)7	62	TTACATGCAGGTGGTGAAAAAGATGAGTTACTCAAAGGATAAAGTAACGGTAAAAACAGAAGATGGGTCTGTATATCAAGCTAAATATGCCATTGTTTCTGTGAGTATCGGAGTTCTTCAAAACAATCTCATTGAATTTCTACCAAATTTACCCGTAAGTAAATTACTTATTTTCTCATTCTTTAATTTCTTCCAATTAATTATTATTATTATTACTAATTAATTTCTATAATAATAATAATTATTATTATTATTATTATTNNNNNNNNNNNNNNNNNNNNNNNNNNNNNNNNNNNNNNNNNNNNNATAATAATTGATGATGAAATGAAATATATAGCTGTGGAAAAGACTGGCAATAAACAACTTCGACATGGCAGTGTATACAAAAATATTTCTGAA…
G1_V2_SSR_60939	p2	(AT)6	12	TTCTCCTGCTAACTTGGTGAAGGATTTCCATAAATCAGATCTTAATCTCTTATCAACGTTCAAGTGTTCTCTCAAAGCATCTTCTTAGCTTGTTTTATCACCCTCATCAATATTAAACCTTTTGAAAGTAAACTCATCTAAAAAAATAGAAGACAAATTAAATGCAATTAGTACAAATAGCAATATAAAATGAATATAAATATATATATATANNNNNNNNNNNNNNNNNNNNNNNNNNNNNNNNNNNNNNNNNTATCAAATTTTCATGCCTAGAAATAGCCAAAAATTGCCTTGAAATAGCCGATGTTTTGGGCAAAAAATTTGCCAAAAAACAGCAGCTCTTTGGGTTACAAATTTGCTTAGAAACAGCAGTTGTTCTAGGTACAAATTTACCTAGAT…
G1_V2_SSR_13595	c	(A)12gaatattaacttcgaannnnnnnnnnnnnnnnnnnnnnnntataaaaacaatattagattttttttctaagcaaaaaaa(AG)7	105	TGACATGGAACAGATTTTGCAAGTAGGTAAGATGACGGCTTGCTTGTTTTATTTTCTTTGACTTCTTTTCATACATGAGCTACAAACATTTGGTGCATAGAAAGATATAGATCATCCTGAATATCAAGGTATGGATATCTTAGACTCGACCTTCAAATTAAAATGTTAAATAACTAGACAAAATATCAATTTAAAAGACAAAAAAAAAAAAGAATATTAACTTCGAANNNNNNNNNNNNNNNNNNNNNNNNTATAAAAACAATATTAGATTTTTTTTCTAAGCAAAAAAAAGAGAGAGAGAGAGTTATAAAACCAGAAAAGAAATGAAAGAGCAAAATTCTTCGTATATACCACTGAGAAGATCTTATGAGAACGAAGAAAGACAATAAGTGGTGACCA…
G1_V2_SSR_56385	p2	(AT)10	20	AGGTAGTAGTAGTAGTAGTAGTAGTAGTTGAACAAATGAAATTGTCACTAGTTTCAATATGAAGCAAAGTTGTACGCATTCCGTAACTAACCAAGAATGCATATCCCAACAAAACATGAACACTTATATCAGCAATTAATGAATATTATTGTTCAACTACATATTTAAAATTTAGTTAAAACTTCAATTAGTAAACCTAATATATATATATATATATATNNNNNNNNNNNNNNNNNNNNNNNNNNNNNNNNNNNNNNNNNNNNNNNNGATGTGAACTTGCTTACTAATCAATATTCCAGCTTAATGGAACGGATAAATAATTAATGGGATTGGGAAGCTAAGTAGTCATTATCGTAGTTTTCTTAATTTTGGAGGAATATTGAAACTGTATATGACTCT…
G1_V2_SSR_31120	c	(AC)6(AT)8	28	CGTTATATTAAATAATTGTTACTAAACAGACGTTACAAAATCTTTTTCAAATCTGCCACCAACACATTACCTAATCAAAATAAAATCGTTTTCATCGCTTGCAAACAAGGAACACAAATTCGATGATAATGAAGATGGACGCTATGAATTTGGCGATTTTGAAGCTGGACGCTGCAAATGGTATTATCTATATATCTATACACACACACACATATATATATATATATGTAGGTATATTTCCTTGATCTTTTAATTTGTATGTACAAGTATTAACTAACTCCGATTTGGTGAGTTGAATTATTGCAGGAATCTTGTTCTCTACCCAAATGGAAATAAAGGAAATAACGTAAAAGATCACATCTCTGTCTGCTTAGGAATTGCAAACTTAAATTCACTCAG…
G1_V2_SSR_24418	c	(ATT)6(GTT)6	36	TACTGCAACTTCTCTTTTTCTTTTTCTTAATTTGCTTCATTCGATTGATATCGTGGATGCATGCTTTGGGAAGAATTGCTTGTTGTCTGCAGTCTATCTGTGTGTCTGTCTGTATAATTCATTATTGCCAATAGCTTGCGCGAGTTTTTGTATTTCCTGTGAGAAAGAATGACAGAAATCAATGAAACATCAATGTTAGATTATTATTATTATTATTGTTGTTGTTGTTGTTGTTATTTTAAGCAACCACTTAATTAGCTAATTAAGTGGTTAATCTTGCCTTCTGCTGGATAGTACTCCGCCTGATTCTCACTGCTCCGCCGAACATTGAATGCATATAATAATATTTTTGAGCATTTAATTTTCAAATTATGTCTTGATCATATATATTTATATATA…
G1_V2_SSR_17882	c	(ATT)6tttgcta(TCT)5tatctgtactccattacttatagatcgatggttccactaagttgaaactacaacgttaacgtattccattagcttacc(AT)8	134	GACCGACTGACTGACTACTCTGGACTCCTTTTACTTCGTATTGCATTGCATGCATCACGTTACTTGTAAAACATCATGAACATGATCATGATCATGATCGTCATCGTCATCGTGATCATGATTATCATACATATATTATTATTGTTATTCTATCCATTCTCTTACGTGTTCAATTGCAATTCCTTGATTGGCAATTTACATTATTATTATTATTATTTTTGCTATCTTCTTCTTCTTCTTATCTGTACTCCATTACTTATAGATCGATGGTTCCACTAAGTTGAAACTACAACGTTAACGTATTCCATTAGCTTACCATATATATATATATATNNNNNNNNNNNNNNNNNNNNNNNNNNNNNNNNNNNNNNNNNNNNNNNNNNNNNNNNNNNAATTCAA…
G1_V2_SSR_53483	p2	(AG)6	12	TGAGGTTTCGTGCTTATATATACATGATAATTTGAATCGTATTTATAAGCACATATATCTATCTAAAATCTGTCCATATAAATATAAATACTCAAAATATGATTCATATACTATACATATTTTGGCTCTAATGTTAGAGAGTAAAACTATAAATTGCGTATATTTTATACAAATCGGAAGAAATAGAAAAGAAAAAAAAAGAGAGAGAGAGAAAAGATCTTGACTCAATGATTGAATATAAGTCAAAGAATGATATATTTATGAGATATAATTATGCTCATTTCAACGTCAAAAGTATAACTCATACAAGGATAAAATTATCAATGAAATCTTGAAGAGGATAAAATATTAAAAAAATTAAAGTTATGGGTCAAATTTTATAAATAATTTATAACTTAA…
G1_V2_SSR_53523	c	(A)11gtctccaaattagaaaaaataattgctcagtat(ATAC)7	72	AAATACACTCTCGTCACCCATATTCCTAACACACCCAAATGGCCAGCCCCACATATTTAATTTCGACAACTTCGAACTCTAACAAATACTGTGTCGTTTTCTACAATTTTAGGAAAACAGAAAATTGACCCTGCCTGCTTTTCTTGCTGCAGTGTTAGAACTTTTGTTCTTACCCTAAACAAGTTATTCTTTATTCCTTAAAAAAAAAAAGTCTCCAAATTAGAAAAAATAATTGCTCAGTATATACATACATACATACATACATACATACATATCAAAAACAAAAATAATAGATGCAGGGGAGAGAGACTTACTTGCACACGTTGAAATTTGTTACATAATTAATAATAAATTCTAGTACTTTCTATATATTTAAGCGATGCTAAATCTTAAGCATTG…
G1_V2_SSR_25974	p4	(ACAT)9	36	AGTACTATATTTTGTGCATAATTAAGCTAAGCATTATATATAAATATTTATAACGTAACTTAGCAAGAATTTTAATAAATGATGAAGATAGGCTAGCTAGTCGTTAGGTTTAAATTGATTGGGGGTTCTTCAATTTCAATGGGTGCATTTGTCAGAATTTCCTGCCCATGTCTTTTTCCTATACTTACATTCATGATACACATACATACATACATACATACATACATACATACATGCATGCATAAATACATACTGGCCGGTTTCAATTTGTTCTAGCCGCCCATTTTTCTTCGGTCACATTATATGTATTCACATTATCAATTGGACCCACATGTTTATCACCAAAATATTAATGTCTAATTTTTATCTATGATATATTCCCTTCTACTTTGTTAAAAT…
G1_V2_SSR_3103	p2	(AT)11	22	CATGACGAGGCATTAATGGTGCTTTTTCTCGACATCATCGGGACAAAATTCTACATTTAAGACCAACCCTTTCGGGAATTCCACATATGGATAAGCTAAAGGTTGATCTTCTTCTTCATTTCTCCATCTGTAGAATAATTAAGAGTCAAAATCCTTCTAAATATCAATCAATTCTCACAGTCGAATCAACTTCACATCAATATATATATATATATATATATTTACCTGAAATTGTGTACCAAGTGGTGAAGGAAGAACGCAACTTCAACCTTGGCAAGTTCAGATCCTGGACAGCATCTAGATCCCCCACCAAAGGGTGTGAATTTCTTGCATGTTTCATCTTGACTCTGCATATATAATATCATAAAAATCAAGAACACTTTCAATTTTTTTTTTTCA…
G1_V2_SSR_37806	p2	(AT)8	16	TTTGGCTTTCTAAATATTTTAATGATATTGACACGGGGTATGGATCCCGATACATGCATATACATATACATATATAATTAATTTAGTCGTAAATTGAAGTCATGAAGAGATTATAATAGATATATACCATGGAAAGTGGACCCTACAATCATACCCTTTCCTACAGGATTTCTGATCTTATGGCTGAGATAAATATACCATATATATATATATATNNNNNNNNNNNNNNNNNNNNNNNNNNNNNNNNNNNNNNNNNNNNNGTAACTTTGCTTTGGCTGTGATGTGCAGATCAAAATTCTGAAGAATTAAATTATATATAGGATAGTACAATAGAGTTGACTTCTTTGCATTGAAGGATCGATTTGGCTAGCGACAACTCATGCTACACTTTTTAGGAAT…
G1_V2_SSR_10527	p2	(AT)8	16	GGTGGCACTCACACTTGGGTGAATTGGGAAGCAACCTCCCATCAAATAAGTGGAATACTAAATTGTTTGAATGTAAATTTTTAAATTCTAACTTTAATTAATTTTTATTAAGTTGACTCTTTTTAGAAGATTTTACTAAGTTGACTTTAAATTAAAAATAATTAATATTAAAAGCTTTTTTTTTAATCCGTTTTCGATAATATATATATATATATNNNNNNNNNNNNNNNNNNNNNNNNNNNNNNNNNNNNNNNNNNNNTAAAAAATAGAACTCCCTCCCTCTCTAGGAAGCTCTAGAACAAGAACGTCTTTAGTATTTGTTGCGCTGTGCTCTTATTTTTTATGTTTTTCAACCGAAAGCCTCTGGTGGTTTCTAGCTCTACGGTTTGCAGCTTGCCT…
G1_V2_SSR_41779	p3	(AGG)5	15	ATGGGACGACATATAAAAAGGAGAAGAAGAAGAAGAAGAAAATGGAGCACTAG*CCATTAGGATATATAGATATATAATTCTCTGCTAATGAATTCTATGAGTTATAATAATATATATATCTATCTAAAATTGACACTTAGAGAGCCAATAAATTCTAGTTCAAAGAATTTATCAAATGTTAACAGGAATGAAAGGGGAAGGAGGAGGAGGAGGAGAAGAAGAGAGGACAATAATTTTGGATTGCGAATGAAGCTAGCCAAGGTAAAATATATGGGAAAGGAGACAAAATTTGAATGGGAATGGAGGGTCCTGAACTTTTACTCGAATAATAGAAGTGGCGTGTTGTTATCTATTGATAAAATCATGCATACAGGTTCTTTTCTTGTGACGACACCCAT…
G1_V2_SSR_24254	p3	(GTT)7	21	TTATTTCCCTGTATAAAAGATTAAAATGTAAAATTATAGAAACCCTAAAACTCCTGCCCAAATTTGTTCCCTTCTCCTTGCCGCCGTTCTTTACTCTTCTTCTCCTTTCCAGCGACTTCATCTCCTCACTACGTTCATCTCCTTCTTCTTTATTTCTTCTCCTCTCCATCCTGGTTTACTGTTATTGATCGATACTGTGGTTGTTGTTGTTGTTGTTGTTNNNNNNNNNNNNNNNNNNNNNNNNNNNNNNNNNNNNNNNNNNNNNNNNNNNNNNAAAAGATCGGTTGAATGGAACAATTTTAGGGCTAAAAAATTTTTATTTTTTTATGTGAAAGGATGAGCAACAATTTGTTGAGAGTGTTATTTAATTGAGTGGATGAAGTTTGTGGTCATCATACG…
G1_V2_SSR_62625	p2	(AT)9	18	TAACTTTTACAGTTAACTTTATTTAAACGGTGTTATAAATTTGTAACTCATAAAAATATTTAATGCTTTTATGGACTTTAGTATAGCATATTAATATATACTATATCACAGTGAGATATCTTCTAAAATAACATACTTGGATGAAAATATCCCAAAAACATTAAAAAAAAGTTGAAGATAAAAGTTCATATACACACACATATATATATATATATATNNNNNNNNNNNNNNNNNNNNNNNNNNNNNNNNNNNNNNNNNNNNNNNNNNNNNNNATTACTAGTTTATTCAAACTTCTCATCCCTTGAGCCTAAAACAAGTAGTTATCACCAATCAAAAACTGTTTACTTACCATGTAAAATTTAACAAAATATAATTCAGAGTTATATAGGTTACAGTTAA…
G1_V2_SSR_20596	p5	(AATTT)6	30	TGTTGTTATGGTTCTGAAGAGATTCATGGAGAAGAAGAAGAAGACAAAGAAAGAAACAAGGTTTTGGTTGGTTATGAATTATAAGTTACGTGGTGGTGGGTGCGATTTTATTAATGGGTAGATTAAATGAACTTAGCCAGAAGTGAAAAGTGGAAAGGAATTGGAGGGCATGTGCTACACATTGTCTTAGAAAGGTTGGAATTTAATTTAATTTAATTTAATTTAATTTGAAAATATTTGAGATTAATGGATGCATATCTAATGGCCAAAAGAAATAACCTTTAAAATTTTCATGAAGACCGAGTGACGCAAGTTTTGAAGATTTTTGGTTGCAGAGGGAAAGGAGTTTAGCAATTTTAGAAAAATTTCTGGTTTAATCTCTTCTTTTCTAAAGAATTC…
G1_V2_SSR_28750	p4	(CACG)5	20	TTTGTTATTTTACTTGTTTGAATTTAACGATTGATTATTGAGACTTCAATTATTAATTTGTCAATGTCGTGCCCCATTCCCCCATACATTGCAAAGTGGAGCCAATTAGCTGAGTCGTAAGCATTAAGCAAGTCGGCTATTATATTTGGCTAGCCCTGCGCGGGGCAGACAAGCACAGCCGTACGCGCACCCACATACACACGCACGCACGCACGCACGCNNNNNNNNNNNNNNNNNNNNNNNNNNNNNNNNNNNNNNNNNNNNNNNNNNNNNNAATATTATATAAATACTTATATTATACATAAATTATAATAAATGTAATAATTTTTTTATTTTCATATAATTATTATAAATTTTATTTATTATTTTTATAAACCTTATAGGTTTATATGTGTGTAT…
G1_V2_SSR_62168	p2	(AT)7	14	AAATTAAATTTTTTTGAATTTTTAATTCAAATTGTAAACAAATATTAATAACAGGTTATAAGTGATATTTTTAACTATAGCTCAAAGTGCAAAGAGAAGAAAGAAAGTAAACGATATAGATAATATTTAATAAAAAAGGAATTGAAGAAAGCAAAGTATAAGATTTTAATATGGGTAAAGTAGTTTTTATTTAAATGAAATATATATATATATNNNNNNNNNNNNNNNNNNNNNNNNNNNNNNNNNNNNNNNNNNNNNNNNNNNNNNNNNNNNNCAAAATCATTTAGTGGCACTTGTTCCATAAGAAGACAATGGGTCATGGAATCCACCAATTAGAGAAAGTGACAATGATATTAATGAATTAATAAAAGCCACTAAATGACTCAATTCAAACACCAC…
G1_V2_SSR_35163	p2	(AT)6	12	GAGATTGCATAAGGGGAAAAAAATTAAAAAAAAAAGACATAAAAATAATTTTAAAGTTAAAAAGTCAACAAATATCTTTAATAATGGTTGTATAACAATCAATGGTCAACCAAATAATATTACAAAAAAATCCTCCTTAGAATTGAATTTACCAAAATCTTAAACAACATATCTCACAATTAAGCGATAAATTATTTTAATATATATATATANNNNNNNNNNNNNNNNNNNNNNNNNNNNNNNNNNNNNNNNNNNNNNNNNNNNNATCACGTTTAATAATTGTTTCAGTAGTCCAGTTACTCAAAAAAATATTAATAATATAACTCATTTTTGTATATTTAAAAAGTATTAATATATCTATATTATGGTTTTCAGTTTCTTAGTTCGATAATTTCACAT…
G1_V2_SSR_63133	p2	(TA)7	14	CTGATTGATAGATTTTTATTAGGCAATTATTGTTATTTTTTTTATTTAATTATATATTAAGAATCATTATTTTGATAATTGAGAATAGGGATAAGTCTCATGAATTGACTCAAAATGATGCCGTTTTCAGTTTCTTCATTAGCTAGTTAGTATTCTCTTTGAGGTTTCTCTCCAATGACCAGTGTTATCAATACTGACTTATATATATATATANNNNNNNNNNNNNNNNNNNNNNNNNNNNNNNNNNNNNNNNNTGAAACTAAAATTATATTAACCACGTGTATATATATAAAACAAAAGTCCTTTTTTTTATATTAACATATAAAACAAATTAATAAGTTATCGCTTGTATTGTATGTGTTTATGTATGTATGTATGTATGTATGTATGTATGTATAA…
G1_V2_SSR_32847	p3	(TCT)7	21	CTGAAAATATGAAATTGAAAATAGTAGTAGCCATTAATTATATTGAATGACTTGCCAACTGTTTTTATTTTGAATATTAATGCAATTAAATATGATTTTATACGATCTTTTTTGATATGTGACATCACTATTCCATTTAATTCTTTCAAAATAAATTTCTTGGAATTGCGAACAATTATTTTGGGTAGCATTATCCTTATCTTCTTCTTCTTCTTCTTCTGCAAATGAAATGGGAGGTATGGGGTCATATGTTCTATATATATGCTAGACACTATTATTAGATAACTATCTTTCTGTCTCCACTACTATTTAAATTGAAAAATGTATACTATAACACTTTCATAATTTCCCACCCACAGACGACCATTTCATTCTAAAGAATTTAAATATAAATAAATA…
G1_V2_SSR_15909	p2	(TA)6	12	AAATTTATATTAAAAATAAAAATACACAAATGATTTAATTTTTATTTAAATTATATCTTTATATTATTATAATTTTATATGGATTAAAATAAACAGATAAAAAAATAATATAATATTATTCACATTAATTTTTATAACATGTAAACATAATAATAGTCATATTAAAATAATTAAACATCTCGTATATATATTTATTATGTATATATATATANNNNNNNNNNNNNNNNNNNNNNNNNNNNNNNNNNNNNNNNNNNNNNNNNNNNNNNNNNNNNNNTATACAAGTCTCAAATTAATTTGTCTTTCTTCATGATTTGATAGGACTAGCTAGCTCAGCATCAGGATAGGGTTTTTCTTCTAATTCTACATTACCCTTGTAACGATAGATATGGGCACAGTACA…
G1_V2_SSR_29596	p2	(TA)6	12	GGAAACAGAACTCCAAAAGTAATGGGGAAAAAAAAATAGTAGTACAGATATAACACGGTTTTCACGTGCCACTGCAAACGGGAAAAATGAAGCAAATTAATGGCAGTACATGTACATGAATTGCAATGTAAGATAACAAAGACAGTAATAAAATTTTGAATTGTTTTGTTTTCTGCAGCAAATTTCCAACATATATATGTATATATATATATNNNNNNNNNNNNNNNNNNNNNNNNNNNNNNNNNNNNNNNNNNNNNNNNNNNNNNNNNGCAACATCTGGTACAAATAAACATGGACTACGCTATTCAAGTGATTCGAATCTGATTAAAAATTCAGTGATAATATTTTTTTTAACTCAATAGGAAACTAGGAAGGTGGCAACTAATTAATTAATTAATT…
G1_V2_SSR_14567	c	(TA)6ccatattattattactattcagaatcac(AT)9	58	AGGTGATGACTAGTACTCTGTTTTCACTATTATTATTATTATATATTCCATGATCTTCGCAGAATTAGATTCTTTTTGGTTTTGAAGAAGAAGCATGTGCTACAGCCGCTTCTTTTTGATGTAATATTGGGCAGGCAAGAATCTTGTTATCTACCATGCCGAGAGCTATATATATAAATATGTATTATCCTTTTTGCTTTATATATATATACCATATTATTATTACTATTCAGAATCACATATATATATATATATATANNNNNNNNNNNNNNNNNNNNNNNNNNNNNNNNNNNNNNNNNNNNNNNNGATCATCTAAAAGGAAAGGAATGATGTTCGAATATGCACATTAATAATCAATCTTGTGCATAAAAAATAAATGCAAAAAAGATTTAGGCCAAG…
G1_V2_SSR_55966	p2	(TA)7	14	CGTTTTTA*TACAATTTTTTTTTCAATATTAATTACAAATAATTGGTATTGAAATGGTA*TTTCATAGAATTTTTATCTTAGAATAAAAGAGTGATGCTATTGTTGCCCTTTCAATTTTCTCTT*AAAACTCCAACTTTTTCTTTATAATTTTAACCTCAATATAAATTAGAT*AAAAAGACATATCTAATTAGACTG*TATATATATATATATTATGTTAAATAATATTTACACCCCCATTATATGTACAATTTATTAATACTTCTTATGAACTTTTAACTTTCACTTACCACAAATTTTTTATTGTTCAACAAATTCATATATAAAAATTTTAAATCAATGAAAATAATAATCATAGAGACAGAATTGATTTTGAAAAAGAAATTTTCAATTATAAT…
G1_V2_SSR_25222	p2	(TA)7	14	AAATTTTGACAATAAACTTTATGTTATAAAAATTTTACAGTTGATCACCTTTCGACAACGGTTACTTTGGGAGGTTTGCTACAAATTTTGTACAGTATCAAACCTTTTAAGGATTTGGTGGAGAAAAAGTTAGCTATAGGATATTTGGTGGAGATAAGATAATATTAATACATACACTTTATTAATATAAATATATATTTATATATATATATANNNNNNNNNNNNNNNNNNNNNNNNNNNNNNNNNNNNNNNNNNNNNNNNNNNNGTAAACTCATATATACTTTATTTGGATTGTTAGCTATCAAGATTGACTCTTAGTTAACTGTTACACTTATGAATATTTTATTAAAATAATACTTTTTTTCAAACACGAGATAATTGTCAATTTTTTTTTTATAA…
G1_V2_SSR_18396	c	(AT)9nnnnnnnnnnnnnnnnnnnnnnnnnnnnnnnnnnnnnnnnnnnnnnnatat(AG)6	81	ACTTTTCTAGAGAGGGAAATTTAAATTTAAATCAATTTATTTATTATGTATTTATCTTGTTTGATTATTTTTAGAAAAATAGTATCCTATATATAGAAATGAGCATTTGTTTATTTTTAGGATTCAAATGTGGTAGCACTATTAATGTGAATATGTGTTATCATATCATAGCTTAATTTCAACTATTCACACAATATACATATATATATATATATATNNNNNNNNNNNNNNNNNNNNNNNNNNNNNNNNNNNNNNNNNNNNNNNATATAGAGAGAGAGAGAAGGGGGTTGGGGATGGATTAGATATATCTAATTATTGAGATTGAATTTAATATATGTATTAATTAATTTTTAATTGTAGGTTTTAAATTTAATATTAATCATTGTTGTTTCTAAATCT…
G1_V2_SSR_25769	c	(AT)9nnnnnnnnnnnnnnnnnnnnnnnnnnnnnnnnnnnnnnnnnnnnaaaatgat(A)10	80	TCATCAACTATTCTAATTAAGCAAAATAAAAATAGTTAATTAATTTTGGTCATCCATGTATGATCTTTTATTAATTAATTTCTCAGTTTGATGTATGGGTGGATTAGTGGGGGATTCATCAATTAGTATACACATACATTATATTATATGTATAATGTTTCGAAAACTAGTTGCACAAAACTTGAAAGCTAGAAATTCGATATATATATATATATATNNNNNNNNNNNNNNNNNNNNNNNNNNNNNNNNNNNNNNNNNNNNAAAATGATAAAAAAAAAAGATGGTGAAAATGTGAGGGAAATTGAAAGAGCTCTTATCATAAAGTTGTCAATGTACAGAAGAATTTCTTAAACGGTGTGGAAAGGAAATTGGGCAAAAGCAAAACAAAAGAAAAGTAGA…
G1_V2_SSR_37014	p3	(TAA)7	21	TAGCAAGTGAGCTTGAGATCAATAAAATAATTGGTTCTTGCCATTATGGTTTTTCTATCTATAATTTCATTTTGATTTAAAATGTTTTGCTATAAAATCATGAATTTTCCATCGCATTAAGACAAGCTTTTATGATCAATTTTGACTGCTTTGAAAATGTTTCGACAGTACAACATATGACATCATCTATATATTTATTTAATAATAATAATAATAATAATNNNNNNNNNNNNNNNNNNNNNNNNNNNNNNNNNNNNNTTAATTTACAATTTACAACATTTAATTAATATTCACTTAATATTGTATCATTCGAACTTTAAAACATGAATAGATAAGTTTATTATAACACATCATAAACTTATTACAATATAATAAATTATTCCTTCTAATAATATCTAT…
G1_V2_SSR_49478	c	(TTA)5*ttttgtaaatggtcgaggggtaaaattgtttaaaaatcgtgtttggtcaagtttag(A)11	83	ACACTAAACTTGAAAATGCAAAAATATTGAGTTTGAAA*GTGTAAAATACACTGAAGTCAAAAGTATAAAAATATACTACACTCATAAATATAAAATTATACTAAACTCGAAAGTGTAAAGATATTTTAAAGTTGAAAATGTAAAAATACTTTTTTAAGAAAAAAAATACAAAAATATTGAGCTTGAAAGYGCAGTTAGTTATTATTATTATTA*TTTTGTAAATGGTCGAGGGGTAAAATTGTTTAAAAATCGTGTTTGGTCAAGTTTAGAAAAAAAAAAA*TAGTTTGTTAAGTGTTAAAAGCTGAAAAAGGAAGGAAAATAGCGGTCAAAATCAGAAATTTCCCCAATATTAAAAGAGAAAACGTTGTAAACTGTGAATGTGTTTAGCGTAGAGTA…
G1_V2_SSR_62798	p2	(AT)9	18	CAAAAAATTTAATTAATTAGGAGGATAAAATCAAACGATTATGATTAAAGAGAAAATTAAACCGTATAATATATATTATCTTTAGATGATGACATGTCTTCATTAGTAAAAAAGAAAAACGTTAACTTTAGTCAAACTAATCACTATGTATAATTATTGAAATTTACCAAATCTTTTACATACCTAATCTACATTTTTAATATATATATATATATATGTAATGATGTTACTTTGATGATCTGGACAGAACTCTGGTCATGATAATAGTTCATATTTTTGAAGTTGAACTTTTCCTTTTTAATCAATGATATATTTTGTTGTCAGTTGCCTGAGTCAACAATTAAACATTATTGACTAATATTGTTTAAAAATTTTCACTTCATCCAAACATTGAATTTT…
G1_V2_SSR_20848	p2	(AT)6	12	TCTCTAATGAAAATAGATTTCTGGGTATTGGATGTGCCAAACAGATATTAAACTTCTTAGTAAAATTCTTAGAAGATTTCTAATAAAATATCAATAGAGCTGTAAAACAATATATACTTATAATATAAAAAAGTGAATAATTATAATATTTTATATTATTATTTTAATGAAGTTAACAAGATTCTATATGTCAATAACCATATATATATATTTCATTATGTAAAAAATATATATTTTTTAATTTATCTAAAAAGAATTGATCAATGAAATTTATGTTGGCAAATGATTCGCTTTGGTTTTTTATAGCTTATTGAAATTTTGCCAAAAGCCTTGAATCATGCCACACATCAAGGGTAACAAACCCATCGTCAAATTAACTAAAAAAAAGGACTAATTGCA…
G1_V2_SSR_12759	c	(CT)9(AT)9	36	GATAATTTGTCATAGAAGAAAAATACGAAAGAATAAAAATAAGAGAGTAAAAAAAGAAAGAAAGAAAATATAAAAAATTTTATTAAATAAATTTGTAAGAATTTTTTATATTTTTATACACAATCTTTGGCCCGCTTAATATAAAGATTAAGATTTTATATAAAAAATATGTGTTACCTTAAAAAGTGGCTGCTCCTTACTCTCTCTCTCTCTCTCTATATATATATATATATATAGAACACCAGAGATATTTAACTGGGTGAGTGAATTTTTTAGCACACTTTATTGTACATTTTTATTCTTTTCATGAGTAGATAAGAAAAGTTGGAGAGTGATTTCTCTCATAACATTGTGTGTAAGAATTATCTCTAATTTCATGGGCAAAATAGTTTATAAGAG…
G1_V2_SSR_64270	p2	(TA)8	16	AAATTCACGTTCTTCTGTGTTAAATTGTTGTAAATATTTAAAAAATTAATTAATAAGATATTAAGTATTTATAATTAAACTAATGTGTAAGACATAGCAAAAATTAAGTTTCAAATCCAACGGTCTTGCCTCGCTGTAACTTGATCTCTCTTAATTTCTACAATGCACTTAATTCTTCTCTAGTTTATCTTATTTAGACTATATATATATATATATNNNNNNNNNNNNNNNNNNNNNNNNNNNNNNNNNNNNNATTAAATGAATTTTAATATGTTCTTTATTGATTGGTGGCGTATCACTTAAATTGATATAAATTTAGCATGATTCTATTACATTTACGTATAGATGATTCTATTATATGTACGTACGGATGATTCATAGTACATTCGAATGGGATTG…
G1_V2_SSR_39661	p2	(AT)6	12	GAGCTTATCCAGAATCTTGGTTTTTTCTTCCCCGTTAGGAAATTCCCCCGCTG*CCCCCGCATTTTCTGGAAGAGCACTTGAGAAGTACATAGACAACTAGAGAATCAGAAACAGAGAAATTATTCAAG*AAATATAC*AAATTTGAGAATTTAGGATAACCAATTTATAATTACAACATAGATACACAAACACTCTTAATATATATATATAAATTTTTGAAAATCTCTTTTTAATTTTCATATGCAAAAATAAGATATAYTTTATAAAACCTATTTTGCACACA*TTTAAATTCACAAATTTCAAACGTATGGTATTTATCTTATCAGAAATAACTAGG*AATTAAATAGAATATAATTATGATTGTGAGAAATACTAATATATATAATACGTGATAT…
G1_V2_SSR_34659	p2	(AT)8	16	TGCCAACTTAAGCTAGTTAATGAAATTTAATAGACATATTGGTGAATTTGTGGACTAATTAATAATGTTTTAATTAATTATATAAATTTAGAGAGTAAAAGAACAATTAAGATTAATGATGGTATTGTGTGTAGGTATGTGTTAATTAATAGTGATTAATTGGGCAAAAGTAATTAATAATTAAGAGTGAAAGTAATACATATATATATATATATGTATATATGGGGAGGGGGAATTGGACTGGGATGCATGTGAACACGTGGAGTGTCGAGGTTTTGTCATGATAATAAATAGAACACTGTGTAAAGGATTTTGACACCATCATTTATTTTGTGTCAGTTCGGTTTTCTTAAGAAATTTCCAAGGATCTTTTCCCGATTCACTTATACTGTATCTCTA…
G1_V2_SSR_27998	p3	(AAT)5	15	AATTGTGTTGCTTTTAAAAGTACGCATTTAATTTGAATAAAATTAGTCTCTGCTCAAAAAATCTACTTAAAAATAAATAAAAGAAATCGATTTTCTTTTTATTTAAGAAGAGAGATAAGTAATTATCGTTAATTTAAAAGTAAGAGATTTTGATCTAAATGTATGAAATACGTTTAATACTTAAATTATCTCAAATTTAAATAATAATAATAATNNNNNNNNNNNNNNNNNNNNNNNNNNNNNNNNNNNNNNNCTTATCGAAAATATATTTGCATTAAAGCATACATGGCTTTTCCTTAAACAATTTAATGTACTCAATACATTACCCACATTCATTTAACCTTGATTAGTGAATAGTTATATGTAGGTAGAAGGTAAACAGAAAACATAAAACATAAA…
G1_V2_SSR_49728	p2	(AT)10	20	ATTCAATTGGGTAAGTGTTTCCAGGAGGGGTTTATAATGAAAGATAAACAAACGTTAGTGGTCTCAAATCGTAGAAAACCTATGAAAAAGGGTGAAAATGTAAATAACTAATTACTGATTGTCTTAATTAATAACAATTTCTTTTATTTTTCTAGATTTAAGATTTGTCTCATTATTTATTGTAATTAATCTTTGTAGCATATATATATATATATATATGATGCTATAATCTCTCTTTTTATGACATGAAATCTTGTGTTTTCTTTTAATATTATATACATGTACAACCTACTAATATTATATCAAAAATTTAATGAAAATTTATGATGAAATCGTATATACCATTGTTCAAATATTTTCATTCAATTTAAGTGATATCTTACTTTTATGTGTAAAAAA…
G1_V2_SSR_3736	p2	(AT)9	18	CTTGCATTAACTATCAAAAACGTCCCCTCCAACTATATCGGCCCCGTTTACTACCGTCCAGACCTCACCGACGTCCAGAAATCCGACGCCTCGATTCCACTCATCGATCTGCAGGGTCTTCACGGTCCTCGCCACTCTGATATCGTAAAACAGATTGCCCTCGCCTGCCAAAACGATGGCTTTTTCCAGGTATATATCCATATATATATATATATATNNNNNNNNNNNNNNNNNNNNNNNNNNNNNNNNNNNNNNNNNATTATTAATATGTTTATTCCTTCATAATACATAATTAACTAATGCATGCCATAAAAATTAAATATATATTTTATGAATCTCAGTGTCTAAAGACGCAAACATAACTACATTTTTCAGGTGAAGAACCATGGAATTCCGGAG…
G1_V2_SSR_25184	c	(TCA)7taatag(TAA)7	48	AATGAAACCACGGAGACTGAACAGATTGCCACCGAAAGTGTAAAACACCCATTTATACACAACCCACCAACGAACAATAATAGATTATAATAATATTCCATCTTCTTGTTACCTGAAAACAATTCCAGGACTACGTGTTAAACAACATAATAATAGCACTGTTAAAAAAAATATGAAATTCATACATCATTCGTCATCGTCATCATCATCATCATCATCATAATAGTAATAATAATAATAATAATAAACAACCACCAAACGCGGTGGTCAAAACTTTTACCTGCCGGCTTGAAATCTGCCTCTCCAAAGTTGTCTTTAACACTTACATAGAAAGCAGATTTCTTAATTTTATTCATGGCAAGAGGGAAGGAAACCGACTGTCTCCTTTTTCAATTAAAT…
G1_V2_SSR_35585	p3	(TTA)12	36	TTAATGAATAATTAAGAAGTAATTATCAATGAGTGAAGCCAGACAAATATATAACTTTCGAAGTAATGTCTGCTTTTAATTAAACTCTATAAACACTCATTTTCAAGAGATGAAGACAGTGGAATTGGATTTCTTATTCTTGTATGAGCTTTTTTTGATATATTTTGTGTTCTCTTCATTGTTGTTTTCGTTTTTGTTGTTATTATTATTATTATTATTATTATTATTATTATTAAACAAGTTATAGATAATTAATAAAATAAAAATAAAAGAGACAAATCTTTATTATACATTATTATAACAAGGACAACTATATTAATATTACATGATATTGGATCGAAAACTCACATGATGAACTAATATGATCACAGGGGATCAAATTAATTAGTTTCAAAATGC…
G1_V2_SSR_18060	c	(TCA)8(TCT)10ttttcttttcttcttttctctctattcattttcttcttcttcttttctctctatttctctattcttcttcttttttctt(TTC)5	148	TCTTCTTTCAAAAGCTAAAATTGTAATTTATAATGTCAAACTAATAAAACATAATTTTTTCCTCCTTCAAATATTCCTTCTTTTTCTTCCTTGAGCATTGTTGTTTTATAAAGTGGAGAAGAGTTCGAATAGACGATTGAAGAGACAAGATTTGTTGTGTGATATCAGAATGTATAATTTTTAGTATCAACATCTTCTTTCATCATCATCATCATCATCATCATCTTCTTCTTCTTCTTCTTCTTCTTCTTCTTTTTCTTTTCTTCTTTTCTCTCTATTCATTTTCTTCTTCTTCTTTTCTCTCTATTTCTCTATTCTTCTTCTTTTTTCTTTTCTTCTTCTTCTTCTTATTTTCTCTCTATTCAGTTCTTTTTTTTATCTCTTTTATCCTTTTCTTTT…
G1_V2_SSR_26487	p3	(AAT)11	33	TTGGAATTAATAAACCTAACCGATTTAGGGATGTGCGTGGTAAGTACGCGTTATTTTACAAAACCTCGAGGGACACGGAAACTGAGCGCTAGGATGTTTCTTTCTACATGCTGGGAAAGGAAACTTCAAACTACGTCCATGTTTTTAGTTACCGTTAAAAAATAAAACCAAAAACAACGAGAGAAATAGTTATTTTTTAAATAATAATAATAATAATAATAATAATAATAATNNNNNNNNNNNNNNNNNNNNNNNNNNCTGATGGAATGTATTCTAGTCAAACAGTGTTATTATTTTCATAAAATCCTTATAATACAAAAATGAAAGTAAAATTTATGTCAAAACAATAATTTTTAGATATTTATTAATATTATTTAGGGGTAGAATTAATTCTTGTCA…
G1_V2_SSR_36132	p2	(AT)8	16	CGTGTGTCTTGATCAGGTCAGCTCGGTATATTCTTGTTCAGGCGTTCTAAGGCGAGTCTGACCAAAAAAGAAATTCTTACGAAAAAAGAAAAGTTAAATTCGAAAGTTTTAATTTAAGGCAAGTAAAGATTTTGCGGGATGCCTTTCGAATTCGATGTTAATTCGAATTTGTAATACTATTAGAAAAAGAAAAAACTGGATATATATATATATATANNNNNNNNNNNNNNNNNNNNNNNNNNNNNNNNNNNNNNNNNNNNNNNCTTTTCTAACTTTCAACAATAAAAAAAAATATTTTACCTTCCTATACTTATTATTGTGTGATATCGATAATTATAATTTTTGGTATCAATTGTAGCTGATTATTTCTTGAACAAAATAACCATAAATTATTTTATG…
G1_V2_SSR_19612	p2	(AT)8	16	ATTACAACATCAAAGAAAGCGAAAAACTGGCCGAGCGTGGGGGTAGGGGAATAAATGCTATCTCATTTATTGATGTGGACGTGATTTTCCCGCAATTCAAATTTTAAAAAACCTACACTTCATAGGTAATTTATTAGCAGTGAAATCGAATTACCAATTTTATGACGGGGGGATAAAAATAAGATAAAATAGATATTGAATATATATATATATATNNNNNNNNNNNNNNNNNNNNNNNNNNNNNNNNNNNNNNNNNNNNNNNNNNNNNNCAACACCATTGAAATATTTTAGCAGTCTAGTTCGAATAATAAAAGTGTTTGGACCGATATAATTCTCAATTTATATTCCATTATAATTTAATCACTGCATATTAAGCCGGTCCCATTAACAAAAGTGTCA…
G1_V2_SSR_26697	p2	(TA)9	18	TCATACATTTGCTTCAATAATTAATAAAGATCATAAGAAATGACAGTATAGAGACAAAACTTAATAGATAATAAAGCAATGTTAAACATGTTAAAGTTTATTCTAAAAGAAATATGGTAAATGATCTGACATTCACTCATGATAGCATACAGATGGAGGTATATAATAAATAATCTTAAAATTTTTACAAACATATATTTATATATATATATATATANNNNNNNNNNNNNNNNNNNNNNNNNNNNNNNNNNNNNNNNNNNTATCATACTTTGTATTTGGAGTACTTCACATAATTTTCTTTACAATATTATGCTTTGGTAGTATTTATCATGCACTTTTGGACTTGAGACTTTTGAAGAATTTTTTTCATTATTCGGTTATAAATGAAAAGATAGAAAT…
G1_V2_SSR_5000	p2	(AT)8	16	TAAAAAGTTTAATTGTATCAACTATCTGTAACAAATTTTATATGTATTCAGATAAAAATTTCATTAAGAAGAGGATTCAAACACCAATCTGGCACTCAAAATTTGATATAAATTCTAATGAAAATTCATACAAACCTATATTGATTATATACTTATTTGTAGGGGTGGTCCTGAACGCAGTTTTATAAGCGACATGTACATATATATATATATATANNNNNNNNNNNNNNNNNNNNNNNNNNNNNNNNNNNNNNNGAAATGAGATAAAAATGTACTGAGCGAAAATTGGAACTATGTTTCGATATTTTTCGACTGTGGTCCATTCAAAAAGAGTGGCACACAATAATTTTGATGTGTGTGTGTGTGTGTGTGTCTCTCTCTATATATATATATGAGAAA…
G1_V2_SSR_32265	p2	(TA)7	14	GGCGTACGTCCAATTAAAGCCAACTGGAAATTATTGTGATTATTCCAAATCCAATGAACCTGCAGACAAGCATGCAGAAAAATTCTGGAGCTCTATTCATATTGAAGAAACTAAATGCATGCAAGATTTATAATAAATTTCTACACCAGACAGAAATCCACGATTTCCGTATGAAATATTTTAGTCTACAATAACGTGCTATATATATATATANNNNNNNNNNNNNNNNNNNNNNNNNNNNNNNNNNNNNNNNNNNNNTGACCTTGAACTACTACTCAACGAAAATTTAAAATTTAAGGAAAAATATTATTATATCCAGCTAGCTTACACAATAATCAATCAACAATTGATATTATTAAAGCAATTTTTTTTAGTTTATAATAATAATAATAGTAATGT…
G1_V2_SSR_17136	p2	(TA)10	20	TGCTTTTCTCCATAGAATATACCCATCAATAATTCTTTCCCCTAATTCATTGCCAACTATTATGTGTACGTTGTGCTTTCATGTTTTGCACATATTAATTTGTTTTTATTAGCTAATGCTGGCATTCATTTGTCCATTACACTTCTTTTCACAATCAAATTTCAAAAATTTGCTATATTGTGATTAGTCAACATTACATTATATATATATATATATATACATNNNNNNNNNNNNNNNNNNNNNNNNNNNNACATGAAGCATGAGATGAAGTGATAACTACCAAGCCAAGTGGTGGTTGTCGCGAAATGTCAATGCTGAATCTTAGATATTATATAACTTCCTCTAGTTTATGTATTTGCTTTGGTTTGTTGCTTCTTGCTTTTGCTTTCTTTGTTGTAG…
G1_V2_SSR_16252	c	(TAT)12tannnnnnnnnnnnnnnnnnnnnnnnnnnnnnntgcaaagttaatagg(TAGA)5	104	TGTTTGCGATTTGGTTGCACCATGCAACTTCTGGAGTGAACCTGGAGAAGCAGCTCATTGCCATGCTGCAGAGCATATTGCTGATTGGCAGTATCGGAGGAAGTCTATGAAACATCGTGCCGTTCTCAAATGAACAACTTCACGATACCATTGGAAGGAAGCTTCTTGTTCTTGTTCTTTTTCTAGCTCTATGTTATTATATTATTATTATTATTATTATTATTATTATTATTATTANNNNNNNNNNNNNNNNNNNNNNNNNNNNNNNTGCAAAGTTAATAGGTAGATAGATAGATAGATAGATAGTGTATTATAGGAAAAAATGCCATGTTTGCTATTTTTCAGCCAAACTCGTCCTTAGAATTTGATTTTTGGACGCTAGAAATAGCTTTAAAATAG…
G1_V2_SSR_25853	p4	(TCAA)6	24	GCTGATATAATTCCAGATCAGAAAAATGATGGCATTGAAGAGAGTGAGTGTATATTCAGGAACGAGGACCAAAGGCATGGATTTTGCCGGGTCTTTAAGGAACACTTATGTGGGCATTTTTTTTGGTTTCTCGTTGTCTTGACATTCACACTTGGCGTTTTCTTTTTCCTTTTTTCCTTGTAACGGGCAGACTTAGCTTTCAATCAATCAATCAATCAATCAAGCAACAGAAGGCAGAGGTTGAAGAGAGTTATCTAGAGAAGAGAAAGCGAAAACGGTAAGAAGAATATTCTAGTGTCGTTTTGAGAGAGATAGATTGTATATGGTTGTCGTTTTAGGGAATGATAATAAAGGAATCCAAAGGATCTGAGGTTTGTCTCAATGTCTCTGTCTTTGTTT…
G1_V2_SSR_4703	p2	(AT)9	18	AGAAATTAAAGAGTGCACGTCTAACTTAATTAATTAGATATACCCATTCTTGTAAGTTAAGTTGTTGATTGTTGAAAAGAATTATTGATGATACAACTCTATATTGACAACAACATGCATATATACGCATGCACGAGGAATATATAAAATTCGATGCAGAATTCTCTTTTGTAGTTTGCAATGAAGTTTCAGCTTTTGAATATATATATATATATATANNNNNNNNNNNNNNNNNNNNNNNNNNNNNNNNNNNNNNTGGGCAAATTAGGAAAGGTAACTAATACATGAAAAGTAAACTAATTAAAAACCATTCCTTTCCGTTCCCTTAAGTTTCGTCTAACGTGTGACAATTAATACAACATGTATTAATTAATTAATTACTAAGTGGTTTATACACGA…
G1_V2_SSR_34324	p2	(AT)7	14	TGTTAATACCTTATTATTATTTATTGTAAACCTTTTTTGTTTGTAACTTGTAATCCGATATTTTATTTGTGTAATTAAACGTTATAAATTTGTCAACACGTTTTACCTAAGGATTGGAAATATAGAATTTGTGCAATTTTAAGTCGAGATTCCTATTAGCAATAGATTTCCTAATTCTACATAATCTTTACTTTGCATCATATATATATATATANNNNNNNNNNNNNNNNNNNNNNNNNNNNNNNNNNNNNNNNNNNNNCTAGTAACCAAAACTCTCTATTCATCTTTCTCTCATTCCTGTTACTTCTCCATATTTGATTTTATACTTTTCTGCCGCACCAACTGAACAGCAAACAATGTCACCCATTGGCGCCGAGCACCAGCTTCTCGATGTCGCCT…
G1_V2_SSR_24719	p5	(TTTGC)5	25	ATTGAATATCATACATCTTCTTTAGAAATTGCCTGAGAAGTTCCGACAAATATATATATATGACAATGTGGGGCACTTCATTAACCCTACCCTACAACATTACATATTTTAATTTCCAATATGATCATAATATGATATATAATCTCATCCTAGCATTCTCGCTAATTAATTAATGACCAAATTAACTACTCTTTTTATATTTGCTTTGCTTTGCTTTGCTTTGCTTTNNNNNNNNNNNNNNNNNNNNNNNNNNNNGTGCAGTTGCAGACATATGAATCCCCAACAATGCAACTTTTTTAATTCTTTTAACCAAAATAAAAAGACTATATATAATGATTCACGTACGTTATGTATATATATAGATATTTATAATTTGGAATCTTGGAAATATATATAAAA…
G1_V2_SSR_10994	p2	(AT)8	16	TTTGAGATCTAATTAAAAGATTCGTCATGCATTTCTTTTCATTTCATCAATATAATTTTGAAAAGGTTCTTGGATATATTAATTTAATTAATGGATAAGATTAGTTAAATAGGAGAGGAGTTTAGCTTACAGTCACTCCGTCCAAATCATTCAGAAGACACATAATTAATTTTTGTTAAAAACGTGGCTAATTAAAAAGATATATATATATATATCATTCGTACAAAGGGAATATAAAAAATAAGAAAAAACAAAGGAAAATAAAAGAAAAAGACCCTTTTCATTGTTTAAAGGAAAGGTTAATCAAAAGATAAAATTTTGAATCATATACTGATAAATGAAGATTATTTCCCCACATATATATATGTACATATATAATTTCAATTTAACAATTAATTT…
G1_V2_SSR_6722	p2	(AT)8	16	TATATATATATATACATATATATCAATCATCAACGTCTGTGTTTATTTAGCATTTAAGTAAATTAGGAGTAGATAATACACTAAATTAAAGTGAACTAAAAATCAACTTTAGACTAATATTTAATTCGATTAATTCGTTCTCAATTTTTTTAACCGAATTAATTAAATAAAATAATTTAAAAATTATCATAAAACTTGAATATATATATATATATNNNNNNNNNNNNNNNNNNNNNNNNNNNNNNNNNNNNNNNTAACACTTACGCATGGTTTCTAATCCGGACATGTCACCATAAAATGTAGCATGAGCATCCTCCCATGGACCATCAACTTTAAGACCAATATTACCATAAGGCATTATTCTTTTAGCAGAAGCCACCATTGCCATTAACACCATGA…
G1_V2_SSR_12176	c	(TAA)8tnnnnnnnnnnnnnnnnnnnnnnnnnnnnnnnnnnnnnnnnnntacaacacaaaataaatacgttatcaaccacaaaaaagcataactacgaaaaagtt(A)11	134	CAAAGAGCTAAAAACAACACACTTTCCACTTACAACAACTAAGACCAAGAAATTCTATTAAACGCAACAGAATTATCACACAACTTCGTTTAGAAAAAATAAAAATTACAAAATAAAAAAGACGTTGCTCAACCAACCATTAACGAATTACAGATAAAAAATTATAATAAAAAGCAAAACTTATGATTCCGTTAATTTTTAATAATAATAATAATAATAATAATNNNNNNNNNNNNNNNNNNNNNNNNNNNNNNNNNNNNNNNNNNTACAACACAAAATAAATACGTTATCAACCACAAAAAAGCATAACTACGAAAAAGTTAAAAAAAAAAACTTATCCATGTGCTTCATGTTCTGGTTTACAAACGGAGCAAGAGAGTAGTATAAACTTACTGGAGT…
G1_V2_SSR_25396	p2	(TA)10	20	TTATCATAATCAAGAAAAAAAAACAAAGAAGAAAAATAAAAAAATTCAGTTTATCTAAACTTTTAATATTAAGCATAAGATGTTTCCATATTGTTACTTTGAATGTAATATAACAGAGTTAAAATTCCTAATTTTGACTGCTTTCAAGTTATAGGATCATGTATTTTAGTTAAAGTTTTAAAAATTAATCAATTTATCTTATATATATATATATATATAGTTGTATCAATTTCTTTAAAGTTTTTATTCAGCAACCTTGTGCTGTTGAAATTTCAAAATTTGTCCTATACACCTTTATTTTCACAAGTTTCATGTCATAAAAAGTTTTAATACAGCATTTGAGAACATGTTAGTGTTAAATAATATTGTGGTACAACAGAATTAACATTACCTCATGTT…
G1_V2_SSR_16881	p2	(AT)8	16	GTTTCAATAATACCTTAAAATGGTTAATTAATTGCAAATTAAAATACATTGAATACGAAATAGTATTCAATACAGTGGAACTTTTAGTACTTGTAGGAGCATCTAACGCTCTGTATATTTATTTCTCCCTTCAAAGATGTATTACTGACTAAATTTTCAAGTATCTCTTCTACTATCACATACTGAATATGACATCTAAATATATATATATATATNNNNNNNNNNNNNNNNNNNNNNNNNNNNNNNNNNNGCGGTGATCGTAATATATTCTGAAATTTCTCTTGCGAACTGCCTTATATGTGATTACCATACAACGATTTTGATAATTTCAGCATGGAAACTTTTACCATGCTACCTGATTTTTACGAATATATATATATATATATNNNNNNNNNNNNN…
G1_V2_SSR_33650	p2	(TA)7	14	TGATTCTTGCAATTTTTATATATTTAATTAGACGTCTTATGCTCAATTAAATCTCATTGTTATCTTTATTTTCTGGAACACACATGTTGAGTTTATGTTCGTTTTCTAATTAACGTTTAAGCTTAAGCCTTATAGAATTAACTGTTCTTAAACAGTTACATTATATATAGGGGAATTTTTAACAGTAAATAATATTGGTTATATATATATATANNNNNNNNNNNNNNNNNNNNNNNNNNNNNNNNNNNNNNNNNNNNNNNNNNNNNNNNNNNNGCTAATATTTCCAAGAGTGGTTTAATTTCTCTGGACAAATTTTTGATTAGAAAAAAGGGGTTTTAATTAGTCGTAGGTTAGGTGCGGGTGAATCTTTTTGGATCCATGGGTTAGTTTCCAATGCAA…
G1_V2_SSR_30080	p2	(TA)10	20	ATATATATATATATATATATAAAATTAAGTGTACATATTTGAATCACACATTTTAAGCTACCTAGAAAGGACGTTCAAAGCTTCATAAGAAATAATATTTCAAGTTAGTAAAGTTGAAATTTCATGAAAATTGTTATCATATAATAACAAGTTCATCAACTTAATTGTTAGAACAAATCATAAATATATAATTAAGGTGTATATATATATATATATATAGGAGAATTGTAAATATATTTACTTTGTGTTTAATTTTAAATAACTTGATTTAAACTTTGGTCAGTCTAACATTTAATATCAAATAATATTTAATAAGTAGCATTTTAAGTTTAATTTTAATTGGAACATGCATTGAGAAATTAAGATTATACTTTCAATTGATTTTTGCCAATTTTAATA…
G1_V2_SSR_5590	p2	(TA)7	14	ATTTATCTCATCGTTCAAGAAGGCAAAAAAGGCATTTGGGCAAAAGGGTAGGACAACCTTTGCTTTATATATGTAGATTATGAAATCTGCCTAATTCATAGCTAGCTCTGTCCACTATTATTATGCAACGTGTAGGACCCATTCCGTTGCTTTTACATTTGATTAATTTGGAAAATTAATTAAAAATTATTATTTTTATTATATATATATATATNNNNNNNNNNNNNNNNNNNNNNNNNNNNNNNNNNNNNNNNNNNNNNNNNNNNTGTGTATGTACATGTGCGTGTGCATGCATGCGGCCAAGTGTTTTTTTGTTACATTGTTTTATAAAAAGTATGGGCACGGATGTAGATTTACATCCCAAACATTTAGAGTTCTAAACAACTACTTACTATAAGC…
G1_V2_SSR_3153	p2	(AT)10	20	ACAAACTACTCTTAAACAAACTACTTTTAAAACACACACTGAAAAGACGTTATAATTCCCAACTCATATACGTGAATATAATTGACCGATTCTGGGTCAGTGATTCAACCCAGCTGGCAAACGACACGAAGGAGTTTCAACTTAGATTGCGCCCCACCAACTAACAGCTAGTTAGCGTTATTATGTGGCTAGCATTTTCATATATATATATATATATATCTTCCGTTTGACATCAGCCAACTACATGTACATATATGTATATATGGCTTTGCAGTAGATAGAACCAAATCGTCCCTCGTCGTATGTTAATGTTACTGATCATCAATAATTCTGAAAATTAAAGAAGTAAAGCATACGCAGAAAGAAAGAATAACACAAAGAGTATGCCCCAAGTAACAG…
G1_V2_SSR_38781	p3	(ATA)6	18	TTTTTCTTCTGAGATCTTGATCCAAATCTCATCCTTAAAATAAATAAATAAATAAATAATAGTAATAATAATGTTCACAAATCTGATTATGATTTTCACATCCTTGTGGCCACTTAGATCTAGTCGATACATTAGTTTACGTATATGAATATATTTTAACCCAAAAAAAAAGTAAAAACACGTTTTTTAAATGAAAATTTGATTATTCAAGTTGTAAAGGGGACAATTCCACTTGAGACTTGACCAAACCACATGCGTAAGACTGATATCAAACCTGCCTTGTTATATAATCAAAGCCATAATAATAATAATAATATACTTTAATGGAAATTTTGAATAAAATAGAAAATAATCAAAATCAATAAGGGAGAGTATTTTATTTTGCTCTCTTATTTTCTT…
G1_V2_SSR_47336	p2	(TA)8	16	CTTACTACTCTCTCTCTCTCTCTCTCTCTCAAATATATATATATATATATATATATAATACATGTTTTAATTAGCAACATCGTGTGCACATATATATACAGATCACGGTAAGCAAGTAAGAAGCAGCAGCCCTAGCTCAACATTTATCTTATTAGTAATATATACAATATATTCCTATATACCACACACAT**TATATATATATATATAATATTTATATATAGACGGTGGTCCTTCAGAGTCTATGGCTGACTGACTTCGAGAGAAGCCGTGTAAGATAAGGAGAGAGAAGAGCGAGAGAGCGAGATAGAGAGAGAGAATATTCTCTCTAGGTTGCTTTCTTTTTGGTGTTTTCTTCTGAGTTTCAAGCAAAACTGAACAAGTGTTTTTTTGCAAGAAA…
G1_V2_SSR_24971	c*	(TA)6(A)10*	21	AATGTAGTAAACTTTATTTTAATTAGGTAGAATTTATAAACATATATGATTAACAAAATTATAACATAAATTTCTTGTAATTTTTCGACATCCTTATTCCTTATTATCAAAAATTCAAACAACAAAATAATTATTTGAAAATAAAAATTTACTTCCACTATCGAGACATCATAACTAATTTCTTGTTTTAACAACTTTTTATATATATATAAAAAAAAAATTGTTTATATTTGAAGAAACAAACATGTGCTAATTGTATTTGTTTCTCATTGATTTTATGATAATTTCATATATAATTTTGCTTGTGCTTAATGACTTTTAATATTAATCAACCCATAAAATTGTATTAACAGCGTATTTAATTACGATTGACTTTGTTAATATTGCTATTTGATTATT…
G1_V2_SSR_17348	c	(AAG)16cagcagctgcttctcaacgtaaatctccaaagaagatggtgagcataaatgacaatgtggagacaataac(CAG)6	136	TACAACTTTATGATGAAATTCTTAACCAGAAATGCCCAGAAGATGCCCAAAGAAGCCTGCAGCTCTAGGAGTAGCCATCTGGTGCACCCCATGGCTGCTTCAGGAACACTACCAAATGAAGATGATGGTCAGAAAGCCAAGACGTCTAGCCCTCATCAAGAGAAAGACAAAACTGCTTCTGAAGAGAAGAAACGCGAACAAGAAGAAGAAGAAGAAGAAGAAGAAGAAGAAGAAGAAGAAGAAGAAGCAGCAGCTGCTTCTCAACGTAAATCTCCAAAGAAGATGGTGAGCATAAATGACAATGTGGAGACAATAACCAGCAGCAGCAGCAGCAGCAAGAAGAAAAAAAGTAAGAGTAAGAAGAAGAAGGAGCAAGAAATAATAGATGATATTGATTCA…
G1_V2_SSR_37270	p2	(GA)10	20	AATGAATAAGAATTGTGAATTTGTTCAATTAAGACCATATATGTATTCCAGCCAGGGCCTAGGTGTGTCGGACTAGGTCTGGTCTACCCAAGATCATGGGCCTTTCGAATTTTTGGGCCGAGTTAAAAATGGAACGCCCAAAGGGCATTTTTTAAAGTTTAACAAAGATATAAATTGCAAATTTTATGATCTCGCACAGGAGAGAGAGAGAGAGAGAGAACAAATTTAGTTTACAACAAAAACTCAATCGCAAATTCCAAAATTATTTGGAGGATGAAGGAATCTTATCATTAATTAATTGTTAACAGGGAAATTACGTGCAAAGTTGCAGTACGCAACGCAACAAAGCGAAATTAAGTTGAAAAATTAACACTAGTTTTTTATTGTGTCCAGAGACCA…
G1_V2_SSR_1554	p2	(AT)9	18	GAAGAATGAGAGTGGTCTGAGACTTTCCAATAAGAAAGATGAGAACTTTGGAGAGTGGTATTTTGAGGTATTTTTCTACTGTTTAATTACTTATTTCAAGTTCAGTTAGTAATTGTATGTAAGAATTCCTTGCACGATTGCCTGCATGTGACCGATGTACGCTTTCTGCTATCATTTAATTTTTGTGGCTTTTGTACGAATATATATATATATATATNNNNNNNNNNNNNNNNNNNNNNNNNNNNNNNNNNNNNNNNNNNNNNNGTCCAAAGACCATCATATATCTGAGATTCAGACTGGCATCCAAACTATTAACTTATTAACGGTATCAATATGCAGAAATTCTTTGATGCAGAAGTAAAAGATTTGAACATCTGCAATTGTCATTTTCCTCATTTC…
G1_V2_SSR_30459	p2	(AT)7	14	ACAATTGTAACTTTAAAGTCATAATAATTTAATACCTCCTAAACAAAGCTTAATATTGTAACAGTCAAGAATCAACATTAAGAAGATAATTTTGTTGTTTCAGAAGGGGTCACCGGGTTAGGGATTCATTTGTTAAACTTAGAAAAACTATGTCCTCTTTTATGACAATATAAAATCTCAGGGACTGGTATGTTATAGGATATATATATATATANNNNNNNNNNNNNNNNNNNNNNNNNNNNNNNNNNNNNNNNNTGGTCATGGTTCTGCAAAATATTGCAGTTAATCGCACATACATATCAGACACTAAAAAGGAGTTAATACCATGAGAGTTAGGAGCTGTCAATTTATCATTTGCTTGTAATAATATACTTTTAGTGGGGACTAATCTGTACAAAA…
G1_V2_SSR_30082	p2	(TA)11	22	ATTATTGAATTGTTGGTGTTGTTGTTGTTGTTGATGATGATGATGATGATGATGATGATGAGTATGATCTGATGATGATGAGTTGATGTTTGAGTTCTGATCGTTACCGATTTTGAATAGGTTTTTCTTCTTGAAAACCCTGCATACTACCCATCCATCCTCCTACAAATTAAAGTGAGTTTAATTTATTTTAATTAGTTATATATATATATATATATATACGAAAAAAAAAGAAGAAGCATGTTTGATGAAATAGTTAAAGGGAAGAAGGACACAATCTTAATTTTATAAGTATATATACCAGATGCTAGCTCTCTAAATTATATGTTTTGTTAACGTTGAACAAGAAATATTTGTACCTAAAAGAGAAAAAAAAATTAAAATCATACTAAAATTTCT…
G1_V2_SSR_7441	p2	(TA)9	18	TAAAAAAGTATGATTTTAGTAAGACTAGAGAGAATTGTAAATTATATTAATGTAATCTTTTTAAGGGAAAAGATAAGCTTTAGTTTAAATGGAAGATCATAGGGTCAAATATTGTAAATGCTTTTTCTTTTTTTTGTTTATTTGGTGGTTGTAAAACTTGCTTAATTAATGTTCATACTTTTTCAATTTGATATATATGTATATATATATATATATAAATATATATAGAGAGAGAGGGAGAGAGATGCAATACTACGACGAGAAATTGTTAATTAGAGCCACGTAGCTGCGTTTTTCTGTTAAGTTTTGCAGATGTTTAAGCACTTTCAACGTAAATGCAACAGCTTTTATCTTAATTATTAATTATCTATGTATATATATATATGGGACAGGATCAAT…
G1_V2_SSR_21193	p3	(ATG)7	21	GACAAATTAATAGTCATTTTTAGTTTTCTTTTAATATATTTTTATTTTTAATTTTTTAAAATCTTATTTCCTCTCACGGCAGATAAAGGATAAGCGAGAGGACAAGATGATCATGTAGATTTAATTAATTTTGCTTTACAGAAATTGAGAATGATTGTTTTCCGGATTTTATCAACAGATTTTAGCTTTCAAAAGTAGAATGATGATGATGATGATGATGTGTTGTGATTGAAAATTTTCCCTTATCTCTCTTTATTATTCATCTATAATTTATGTAATAAATTATTATCTATGAAGAGGGGAACAACGATTTTTATTTTTTTTAATACTACAATGATACAATATATTAATATCATATAAGTGTTTATTAAGAGTGCAAGTATAACACATCTTCATATA…
G1_V2_SSR_9460	p2	(AT)9	18	TTGATATTTTGTCACTGTTAATCAATCTGTAACATACTTAGAAAATAATTTATACTTAATTTAAAATAAGAATTGAAAGGATTAAAGGTTAATTACTTACTTTAGAATTCAACTAAGAAAATTTGTATTAATCCCTAGTAAAAAATGCCAATTACCATCCAATAATTTTTTTTCCCTCTCATAAACTTAATGTTGGAAAATATATATATATATATATANNNNNNNNNNNNNNNNNNNNNNNNNNNNNNNNNNNNNAAAACTCTCATAGTGGATAATATACATTTTAATCTTATAATTCTCCCCCTCCTATATATATATTTTTTCATATTTTAGAAAATTTTCTTACTTAATATATTTCTTTCTCTTAGTTTCCATAATCTATACGATTTTATGTTTCAA…
G1_V2_SSR_34746	c	(TCT)5tgttttctctctttctcctttgttccctcggattttatcttgcttctattttggtttctatctaatttaagaaacattgaaact(TA)8	115	CTTTCTAAAATCACAGGATTCAACAGTTTATCGTTAAAAGTTATTCAAAACCTAATACCTATTGCAAATACAAGAATAAAACTACTCTAATTTTATAAATACAGTCCATTAGGTTTCTAGATACTGATTCAACTTTCTAAACCTTTTCCTATATTTTTCCTTTTTTCCTACAAAGAATTCCTTTCTATTTTTCTTTTTCTCTTCTTCTTCTTCTTGTTTTCTCTCTTTCTCCTTTGTTCCCTCGGATTTTATCTTGCTTCTATTTTGGTTTCTATCTAATTTAAGAAACATTGAAACTTATATATATATATATATNNNNNNNNNNNNNNNNNNNNNNNNNNNNNNNNNNNNNNNNNNNNNNNNNNNTGTAAAGCTACTATCCCACTGCTTTCAAATTTA…
G1_V2_SSR_9251	p2	(AT)6	12	TGCGCGTGAAGGTGATGAATGCAACTTATTAATTCTTGCTAGCTGCTCTACAATAATGGATGCGTTTGAGTTCTGGCATGCATGCATGCCTCAACATTGACCTTGACCAGTATACAACAACAATAATCACAATAATATTGTACAACATAAGAGTTTAATTATTTATAGAAATTAAGTATCAATATACATACATACATACATATATATATATTTATATATATATGTTAATTGAAATTTTGTTGTAAAGTATTGAAAGATTGCATAAATGACATGTAGCTTCTCCGTCATCAGTTTGAAAGCTACGTCAGACTTGTGAAAATATAAGCCAGTGCTGACCTCATCATATTTTTATTATATTGTAATTTTTTTATCTGATTCTCGATATATATATATATATAT…
G1_V2_SSR_18066	p2	(AT)9	18	TTTAATTTTATGAGAACAAGAAACATACCTTGATGAATGATGAAACAAACCCAATTAAGCTAGGAATTTCTAGTTTTATTTAAATATTAGAAAAACAAGGTAACAGACGAGAAAGGTTGGTTGGTACAACAATAAATTAATAATGATAATCATCTAATGTTTTAATTAACATCAATGCATCTCATTCATAAGCATGCAAATATATATATATATATATNNNNNNNNNNNNNNNNNNNNNNNNNNNNNNNNNNNNNNNTGTACCATATGTTCATGACACCTTTCAAACTGCCTATGATTGAGCCGTTAGCATTAATTTTATAATTGCTTCAGTTAGCGGACATTGAATCATGTCTCATCATCCTATAAAGTTATTTCTTTTTCCAATTAATTAAAACGAAA…
G1_V2_SSR_62677	p2	(AT)6	12	TATTTGCGAAATTGATTTTTTAATCGCATTTAAAAAATAATATATGATAAAGCAACTGCCAAATTAAAAAGCAAAAAAAAATGTCAAATATATAAAAGTACGATTAAATAAATCATCATCAACAAAGTCCATTACATTTATTTTTATTATTAAAATTAGAAAAAAGAAAACACACAACACAGGTATATAATATATATACATATATATATATAGCTCAAACTGCAGATCAAATTATTTAAAATAAAATTAAAAACACCAGGAGATTTAATAAAGATTAATTACTTGGAGGGTTGAGTTGTGTATGATTATTAGTAGTAGTAGTATCACCTGGGGGAAACATTGCTTCGTAGGTCTGAATAACACTGAGGACGAGGGCCAATATGGCTCCAGGAAATGCAA…
G1_V2_SSR_27916	p2	(GT)6	12	AAGTGTTTGTTTCAAGTTTTCTGTTGTTTGAAGAATTCATTCAATTTCAGAATATCCATATTTTGCAGCAACAATCAGCTTTTTATTTTCTGCTAATTAGGCTAATTCGTCTGTCTGCATAGATCTTAACTGATCACTATTAACTTGCAATTTTAACACCGGATCCGATCGCTTCAGTTTTAGATGGTATTGTATAATAGTGTGTGTGTGTCGGTCGTGGTGGTGGCGGCAGTGGATGTTTAATTCAAATTTGCGATCTACCCTCCTATTTTCGGTCTTTATTAAGCTCACATGCTATATTATGTCTTGTCTGGGACTCGGCATGCACGTTTAGTGTACGCGTATGGCCAAGAAAACAAACATTGGGACCTTGATGAATAATTTCTGAAAGAGGACGTC…
G1_V2_SSR_29895	p2	(TA)7	14	AAATCTCACACATATCCTTATTTTAATATGTGAATTTAGACAAAGATAAAAGAAATATGATGTATTTAATTCTTAAAATAATTTATGATTAAGAACGTATTATAGTAATCATAATAGAAAAATGAATAAACTACGTACATAGACAACTTTGAAATCAATGAAATTAAAATGTTATTGTAGCCAAACTTGTAAGTATATGTATATATATATATATTCTTTTCTCACTCTAGCCATATAGTTTAATATTAGTATAATAATATTAACTCTTTTCAAGAGCACTCACATTTGTAAATTACAACTTTGATATAAATAAATGTTAAATTAATTTAAACAATTTTGATTTATACTAAAAGGTTATTTTCAGTCTCTCTCACATTATTGATATATATCATGTATTAA…
G1_V2_SSR_53788	c	(GA)7*ga*g(GA)6	31	ACCCACCACCCCATCCAAACCCAGAATCCCAAAATCCATATTGGAGACTCAAAACAATCTAAACAATTTCCATTCAGCATCAGCTAATGAAAGTGACACTACTTTAAGCTCTAAATAGCTTCAAGTCCAACGAAGAAGAAGAAAGTATAGTCGGTGTGCACTGTGTTCAACTGAACTATGAG*ATAAAAAAAATAATTGGAGAGAGAGAGAGA*GA*GGAGAGAGAGAGAAGAGAGAGAGAAGGAAAAAAAGGGAGAATCAGAGAGAGAAAGAGAGTTGAAACTGAAGAGAAGACAAGGCTGGGACTGTGAACACACTCCACAACTCGACTCAGAAGACATGCTACGCTACGCTTGCTAGCAAACTGCTTATATTTATCAATTTTTTTTCGACTGAAAA…
G1_V2_SSR_35463	p2	(AT)11	22	TAGTGATCCAAAAGTGACAAGGAATTACCAAACCCAGGTCAAGATTCTATAGAAATATGCCAAATGGAAATACGCAGCAACGGACCAATAACTTTGATTAAATTACTTACAGATTAGCATTAAAGGAAAAACAGTGAAAAAGTAATTATATAATAATAGCAGTAAACTTTTGGTGGCATTCCCAATGCATATAATAAAAATATATATATATATATATATATGCATATATAAGAATGGAGATGAGATGAATAGTGATGAAGAAATGAAGTTAAAACAAGATTAGGTACTTTCATGTTCTATAAGCAGTGGCACGTGAGGTTACATTATTTCTTATGGTATGTAACATGTGGTTCAAAGACGGCCAAATACATCCATCTGCTTTAACTTTTTAATTAAGTG…
G1_V2_SSR_27707	p2	(AT)6	12	ATATCTCTAAATATTGTGGAAAATTAGGTAATATTATTATGCCATACAACCAACAACCATATATATATATATATTGTTGTCATTACTCTTTTATTGAAAATTTTTAAAGATGTATCTCATAATTACTTTAAGAATTTATAAAAATAAAAACACAATTTTCTCAAATGTAAAAATATAATATCTAACAAAATATTGATTAATATATATATATNNNNNNNNNNNNNNNNNNNNNNNNNNNNNNNNNNNNNNNNNNNNNNNNNNNCCAATAAAAATTTTTATGTTGTGAGAGAAAAATATCAAAAAGTCTCTTCCATTTTTAGTACGAAGTTTATATATACTTGTATTTTTTCCTCTTATTGGACTATAGTTATCACTATTTTATATTTATTCTAAGCCATG…
G1_V2_SSR_33863	p2	(AT)8	16	AGGCGACAATTTTCCAGAATAATAACATTTTAGTCTCTGTATTTTTCTAAAATAATTAATTAGATATAATTTGATAACTTTAGCAAATCAGTCCAAAGGCTACATCTCCAAATCTTCGCAAATTCGCATTTGAGGAACGAAAATATGAAAATTAAACAAATTATAGATGATAATATTATAGAGATATATTGATAATATCATATATATATATATATNNNNNNNNNNNNNNNNNNNNNNNNNNNNNNNNNNNNNCACTTTTAATAGTTGATATTAAATCGAATATGTATAATTTATGTATAATTAATGTACATGTCATATTTAATCCCAATCATTATAAGTGTATAAATTCAACGGTTTATAAATGACTATATATATATATATATATAAGTATAGAATTGC…
G1_V2_SSR_22288	p2	(AT)7	14	TCATTTCCTGCGGTGTACTCGATCTACATAGCTGTAATCGCAATGACCCAACTTCTATTGGCTTATTGTAAATATAACTCCCTTCTTTTTTCAATTATTCAATTATATGTATGCTTATAGAATTTGGGTTTATTTCTTTTTGATATTCCCTATACCTATATTTATTTAATAAAATTTAACTGTATCTCTAATTTTTAAAATATATATATATATGCGTATATAATAGTAATGTGTTAATAATTTTTTACTTTTCTAACATTATACTGATTTAATTTTAATTATATGAGAACTATATATTTAAATTTAAATAAAGGAGTCAAATAAATAAAATATATATATATATANNNNNNNNNNNNNNNNNNNNNNNNNNNNNNNNNNNNNNNNNNNNNNNNNTAAATT…
G1_V2_SSR_16885	p2	(AT)11	22	CTTTATGTTTCAAAGTTAAATTAAGTTTCCTGCTCTTAATTTGTATATTCTAATTTATCTTTGAAGACTAGTACCGTATAATAGCCAGTACATTATTATATTAATTTTTTAGTCCGTGATGTTGTAGACAACTTGCCACCACAGTGCACAGCTGTACCCTAATGTGGGATGAATATGACCTTACTCTATAATTGACCTAATATATATATATATATATATATNNNNNNNNNNNNNNNNNNNNNNNNNNNNNNNNNNNNNNTCTTTTTTTTATGTATATAATTTTTTTTATTATATTTTGTGTAGGAAAAAGAAGAAATTGCATGAATGAGAGGCGGACAAACCCATGCCTTAAAACGGCTGTGGGGCTGCACTAAAATTTTTGAATAGAAGAAATAAAAA…
G1_V2_SSR_28005	c	(ATT)5agtattgtttcaatcttatatactatattttcagtatcttctctttcttaatttgttctctgtatgtaacg(T)14	100	NNNNNNNNNNNNNNNNNNNNNNNNNNNNNNNNNNNNNNNNTATATATTTGAGAATAATATTTGGTTGTGTGATGTAGTGTTTAGGTGATCATATAAACGGGTTTAATGTGTTTTTTGCAAATTTATGTTAGTGTAGAATTAATGGATTAATTATTGCAGAAGCACTTAATATTATTAGTATCATCAGGAACTCAGATGCATTATTATTATTATTAGTATTGTTTCAATCTTATATACTATATTTTCAGTATCTTCTCTTTCTTAATTTGTTCTCTGTATGTAACGTTTTTTTTTTTTTTAATTTTTCTCAGCTATATGTATATATATATTAAAAATTTAATGTATTAGATTGACCATCTTTCATATTCTAGAAATTACATGCTCAAAAAGAATTCATTC…
G1_V2_SSR_34161	c	(AGAA)8agannnnnnnnnnnnnnnnnnnnnnnnnnnnnnnnnnnnnnnnnnnatgataatgata(ATG)7	111	AAACAAAAGTAAAAAACAGTACGACGACAAAATTCCAAAAAAATAAGAAAACCAAAAAATAATTTATGCATAACACTGTTTAGGTGAATAATTACAAGAATTAATAGAAATAAAAGCCTCAAGGCACATGCATATGTTTCAATTATGCATGCTTCCGTTTTGGTTTACATATGAAAAAAGCTTGTCTCCCATCTCGGAGAGAAAGAAAGAAAGAAAGAAAGAAAGAAAGAAAGANNNNNNNNNNNNNNNNNNNNNNNNNNNNNNNNNNNNNNNNNNNATGATAATGATAATGATGATGATGATGATGATGGTGAAGATGAAGAAATGAGCACGCTTGAGTTGGCATTAAACCCTAGATTAATGGGGTTGGTTGAGATGGAGTGTGCATGAGTTGGCAAT…
G1_V2_SSR_8118	p2	(GA)11	22	TCAAGGGTTTCCATTAATAGATTTAACTTGTCTATATCACTTTGAAAATTTTTAAGAAAATCTTACAGTAACTGATTAATTCTATCCTAATAAATCCCAAACAGCCACTAACATTTCTCTGAAGAAGAAAAAGAAATTAAGACTTTATATGGAACCCTCATGAAATGACCGCTAACAAGGTAACTTGTTATAATTAAAGGAGAGAGAGAGAGAGAGAGAGAGNNNNNNNNNNNNNNNNNNNNNNNNNNNNNNNNNNNNNNNNNNNNNGATATCTAGCCTCTGATCTTATTTCGGCTAAATGGATAGAATTTGAGACCTTAGCTGAAAATTCTAAACTAGATTTCTCAATTTTTAGTATTATCAAAAGGAAACATATTAACTAATTTTTATTGGTAAAAT…
G1_V2_SSR_64069	p2	(AT)9	18	CACATCCAATTCAACACCGTGCCTAATAAGAAATAAAATACAATTCCAAAAATAATAAATATCGAAAAATGACAATCGATTTTCATCATATATAGTACAAAATATTTGCTCTCACATCACGAATCAACTCAATTGCACCAAGTGCAATTAAAAAATTATTCTACTAATTAAGCTTTAATCTTAGTGACAAGTTAATGTAATATATATATATATATATANNNNNNNNNNNNNNNNNNNNNNNNNNNNNNNNNNNNNNNNAGCAAAGGAATCCATTGAATTGAATCCAAATTCAGAACACTACTTGGAATTTTCTACACTTTCAATCCCATATATCAATCATTCTCTGCTAAATTAAGATACCTGTAATATTATTATTATTATTTTATATTAAAGAATTTT…
G1_V2_SSR_29896	p2	(AT)6	12	AGTAAAAATATTAGCACCTCTTTTATTTTTAATTAGAATAAGGGTAAAATAGTCAATTTCTTTGTTATTTGTGTTGGAGTGTGAATTTAAATAAATTAGTTGTATATCTAATATATGTAAATAAATAAGGGATAAGACTAAAAATAACCATATACTAAATTTGCATTTTATAAGACTCGGGAAGTTTTCCCTTTTAAGAATATATATATATANNNNNNNNNNNNNNNNNNNNNNNNNNNNNNNNNTATATAGTCGAGATAAAGGAGCTCTTACTTTATACACAAGATTTTTATAACTTATCAATACATTGAATAATTGAGCATTGTGAATATATATTAATTAGAATGCACAACTAAATATTAATTGTATATAAAAGTCTTAGGTAGGGCCATCCTATTA…
G1_V2_SSR_16049	p2	(AT)9	18	AAAGTCATACCAAATGATGAAACGTGGTTGTGGTTGCCTCCACTTGTACATTGTTCTAACAATGAATTATTGAATGCATTATTTTTGTGTGATGCCACAAACAAATCAATTAAGATGGTGCTAAATCGATGTAGCATTCATTTTAAATACAAATAATCCAAACACTATTGCTTGTGACTTTGTTATTGCAATAACATACATATATATATATATATATNNNNNNNNNNNNNNNNNNNNNNNNNNNNNNNNNNNNNNNNNNNNNAATTTTCTCTACTATTTCAGATAATACCCACTTGCTTTTTGTTGTTTCACATATATTCAATTATCCCTGCACTTATTATTTTGTACAATATTTAACACAATTTGATAATTTTAATTTAGATGTGAATTTAAAATTTT…
G1_V2_SSR_61376	p3	(TAT)6	18	TATCGTTTTTCATTGAACGTAACACTGCTATCAGTTCATATTATACATATTTTATTGACATGTTAATTCCCATTTGCATTTCTAGCTGAAAAATTAACGAACAAAATTTTCTGATTATGTGCTACATGTTAATTTTTATTATTATATTATCGTTATTAAAAATTAATTTAGATTATTAAAAAATAAATAAGAACATCACTATTATTATTATTATTATTANNNNNNNNNNNNNNNNNNNNNNNNNNNNNNNNNNNNNNNNNNNNNNNNNNNNNNNNNNNNNNNNTATTAGCAAACAATTAATACTATCATAGAAATCCAAACAACTCTGATATTGCAAAAATATCAATGATTTCAAATATAATGAAATCGAGAATTTTAAATATTAATTTTATAATAGTA…
G1_V2_SSR_21196	p3	(ATT)6	18	TCGGAAATCACGTTTAGAGATAAATTTTGTGAAAATTCATGGAATTTCTCGAAGTATGTCTATTTAATTGACCATTAGAAAAATATTAAATAATTAAAATAATCTCATTAATAAAACTCTAATCCTACTCTTTTTATCTATTTATTTTTTTATTTAACTTTCTAACTACTAACCAAATGTAACACTGGCGATGATGGTAATTATTATTATTATTATTNNNNNNNNNNNNNNNNNNNNNNNNNNNNNNNNNNNNNNNNNNTGATTACGTAAAAAGAATGATAAGACTAGGGTTTTATTAATAAGGTTATTTTAATTATTTAACACTTTTCTAATGGTCAACACATAATCAATTAGATTAAGGGAGGTCTCTGTGAATTACTCAAACTTTCTCTTCACATG…
G1_V2_SSR_56813	c	(ATT)8tctttcatgtaatttgctatagatgcatttaatatatatac(AT)8	81	CCATCAATTCCAGAACTATGTCCATAATTTATTCAATAACAGATAAGCTTTAATTCTTCTTCTACAACCTTATCTTCCTCTTATTCTGACCTATTTCTTCAATTGATGCAGGTTGCCCTAGCTTCGTTTTTACTTCTTTTTGTTCTCTTCGTACCCCTTTCTTTCATCATTATTACATTTAACTCAGTTAAAGGCATTAATTATTATTATTATTATTATTATTTCTTTCATGTAATTTGCTATAGATGCATTTAATATATATACATATATATATATATATTTATAATAATAAAAGCTTATGATAAAAGAATTTAACAACATTAAAACCCCAAATTTATTGTACCATTTAAAGATTATTGATGGAAGAAGCTAATTAAGCAAATTTTGAAAGGGATAATG…
G1_V2_SSR_18317	p2	(TG)8	16	AATGTGAAATGACTGTTTTCTCATATTATCTTTGCTCTGCCTCCGCTATTTGTACAAAGCAGGGTAATTTTGGCTAATAAATAAGCAGATATTAGCAGTTAATCTTGCTTACTGGGTATCATTGCAGAACTTTTTCAAATTCTTATAGAACCCTGTGGCTTGTACCTCAATAGTATGTAGTCTTTGTCAGCTTCCTCTATGTGTGTGTGTGTGTGCGTGTGAATAAATACATTATGCCACGGTGTTTGTTTTTCCTCAATGAATCTTTGCTGGGAGTGGATTGGCTTTACGCATTCTTTACAATAAACTACTTGAAGAGAACGGGTATCTGTCAACAGAATGTGATGCTTGTGGGGATTTGCTGGCTTTTCTTGTAATAATGATTTTTGATACTTTATC…
G1_V2_SSR_20810	p4	(AATA)6	24	AGATGATTTTAGAAAAAGCCTGGTGTTTATACGAGATTAAAATTTTTTTTTTAAAAGAAAATTAAAATTTTTATTTATTTTTAAAATTTTAATTAATTAGTCATATTAAATTTTTTTTTGATATGTACATAGATCGTAAATTGGACGAAAATATATTTTTAGAGTGACCGAATTCGATGAAAGGAGGAATATGATAATTAATAAATAAATAAATAAATAAATANNNNNNNNNNNNNNNNNNNNNNNNNNNNNNNNNNNNNNNNNNNNTTTTATGAATTAAAGCAGGGCATGAAGAGATAGTGTCAGTGTTCCCAGATCCAATGCTTCAACTCCATACAACACGCTCTTGGGACTTCTTGAAAGCAGAAGCTGCTACTGAACCAGAACCAACCACAAGCA…
G1_V2_SSR_24180	p2	(TA)7	14	TTTTTCTCCTTTACATAATTTGATGGGTATATATTTTATATAATATAATAATATTTCCTAAAATCCTTTTATGATGATCAAACAATAGTCACTTTAATTCTAGTAGAGAATTTTTTGTAGATTTATGCTATTCTAATAAAGAATTGTTTAGTTCATAAATTTTAGTAAGCGATTTGTAAATTTATTTTTAATATTATATTATATATATATATANNNNNNNNNNNNNNNNNNNNNNNNNNNNNNNNNNNNNNNNNNNNNTTTTTTATTGAAAATATTGATTAAATTTAATTTGATATCATCAACAAAAATTTATTTGAATTTAATTAGATAAAATCTATACAACCTTTTCGAGAGATCTTTATTCTATTTATTTTCTTTTGGAATATAAAAATTGACCCC…
G1_V2_SSR_33028	c	(ATA)5(TTA)5	30	TGACTGAATTGATCAATTTATATTGTTTGTAGGTGTGGATGTATTAGACCATTTGCACTACGAGTTTAGAGTTTGGGATACACATTAGCAACTGGTTGCCACATATATTAAGGTGGCATTCGAATTTCAAGAATGTTCGTACGAAAGACTTAAAAACATATATATTCAGGGCAAAAGCACTAAGTACAATGTGCTGGACATAATAATAATAATATTATTATTATTATTATCAATTTCTACATGAATGTTATGTGAGTTAGGACTTAAAAACATTGTTACTTTTAATTGACGAATATTTATTGTGGGATAGACTCCTATTGTATTGCGATTGTTACAGCTTATGGCTGAGGAGCGGGCGTTACTCTATGTTAACCGCGTACTCGACGTGACTAAAGATGC…
G1_V2_SSR_44310	c	(ATCTCC)5atcccatcaaaatgggatttg(ACT)6	69	TAAATGTAGAAAAACTTTTGCCAAAAGAAAATTATTTTTTGTTTTTTTCTCAAAAGAAAAATCAGTTTGAAAATAATTTCAAAGTTTAGTGCATATGTATAATATATGCTCTTGATAACGATGCAGAGGATAACATAGTTTTGTGCTAAAATTAGGTTAAAAATGGGGGGATTGGTGGTACATAAACCAATAGGCTCCAATCTCCATCTCCATCTCCATCTCCATCTCCATCCCATCAAAATGGGATTTGACTACTACTACTACTACTACAAGTACCAGTACGAGGCTCCCAGCACAAATCGTCTGTCCCTCCTCCCTGCTGCTATCCTTCCATTTTTCAATATTTGATTCTCGTTTGCTTTGGAACTTGCATGTCTTGTCATTGGAGTGGAATGGAAT…
G1_V2_SSR_35884	p2	(AT)9	18	ATTCAAGTAGTTTCAACGGTTAAAATTAATTCAAGCACGTATATTAATTATGATATATTAATTATAAATTAATTATATGTATCATGTTTAATTTCAATCGTTAAAAATACTTAATGTAACGATATGTAAATAGTATAAAAATTATATAAAATTAAAAATTGTTGCAAAAACTTCACTCCTAAACTTTTGGGCTACATACATATATATATATATATATNNNNNNNNNNNNNNNNNNNNNNNNNNNNNNNNNNNNNNNNNNNNNNNNNAAAGTTTATAAATTTTAAATAACTGAGCTCTTACATTTTTTTTTGTTTTTGATATTAAATCTCAAACATATATTAATTATGATATATTAATTATAACAATCTAATTTTTTTAACTAAATAGTTCATAATAAAC…
G1_V2_SSR_9922	p2	(AT)10	20	TTTTATTAATTTGCATGCCTTTATTTTGTATCTTTACTTACATGGCTTTGCTCTGCCGACTAGTGAACAAAGGCGGCATTGCGATATTTGCATTAATTTTATGCTAGCTGATGCCCTCGATGCCGTATAAAAGGCCGCACTTGTTTTGCTTTGCTTTCGAAAAGAACCATCGCACCCCAACAAAGTAATGGTCTTATAAATATATATATATATATATATGTATGTATAAAATCCTTTATCACATTTTACTGTGTAACTAATATTAATATACATAAGATATTGCGAGCATAATTGAGTGGCAATCGCACCCCACCATTTTATTACTGTAGATATAGATGGCTTGGCTGGCATCAATATTTAGAGGATTTGTTTATTTGAGTGATTAAAAAGCTTTTCAAG…
G1_V2_SSR_16092	p2	(GA)14	28	CAATTGTCTTAGGTAGCTAGCAACACGAATTTCTTTTTTATTTGATTTCATAATTTTCAGTTATTTAAAACGGGAAATTTAATTCAAATGGGTGAAAGAAAATGAGAAAATTATTCTTGACATGACACGAGTAGTTTACATTTACCACATGTTGTGCTGTTATTATTATTGTTTTCTATTATTACAATTTACCATCTACGAGAGAGAGAGAGAGAGAGAGAGAGAGANNNNNNNNNNNNNNNNNNNNNNNNNNNNNNNNNNNNNNNNNNNNNNNNNATACATACTATTTTGACTCTACCAACACAAATTTGGTTCAATCATAATGGATGAGTAATGAGTTCCACCTCTATGACTAGCTATATATAACACGTGTTGTGAAAGAATTTGGACAATTGCTAT…
G1_V2_SSR_12304	c	(TAAA)6aacgaatc(AT)9	50	GAACATAGTCGTACTCCGACCCTAAAGCACCTTTTAAGTTGCAAGCAATTTGGACATGGGAAGCGCAAGAACTTTTCCAGAATGAATACAGCTTCATCTGCTTGCTACTAATCTTATTATCATCAGTATTATCGCCATTGAGGTTAGCCTGCAGTAATTAATTGATCGATTAACAAAATCATCAATCAAATTCTATGTTTAAATAAATAAATAAATAAATAAAAACGAATCATATATATATATATATATACATACACACACACTATTATGGAGTTGTACTAGTTTTTCTGCTCTTGCTTTTGCACTTAGGATCTTTTTTATTGTCAGAATCCGCTTCAAATGTAAGTACCAGCTCGTTGAATTTCGTATAGAAGAATTGCTTTCGTGACTTTTTACAGG…
G1_V2_SSR_63018	p4	(TAAT)7	28	GTTTTTCATATCTTTTCTCGGAGAATATAAAAAAGTTGCTTGACATCAATGGTAATTTGAGCGTTCATGAAGTATTTTTTTGCTTGTATTTTACGTGCCTGGCCTTCCATATTCTTCATAAACCGCAATGTGAATAATATCCATCAAGGTCAAGAATTAGGATTAATCATACATATATACTAGCGTATAATATTAGCACTAATTAATTAATTAATTAATTAATTAATGCATCATAGAAACTAATACTTCATTAAGTTTAGATCTTGATTATTTGTTAATATATAATACAATTTTCATATATGTATACATAGAGGTCAAAATTAAGTTTGCATGCACGGAGTCATTAATCAATTAAACGACGTTTATGTGAAAAATGAAGTTTAATTTGTAAATGTGAAC…
G1_V2_SSR_37276	p2	(AT)10	20	AAATTAAAATTAAGGGAAGACTGATTATTATTATTATTGTTATTATACCCTAAAGCATCCGCCACAGAATCCACCATCGACGTTAAAGGAGGGAGTAGATGCAAGGTATCCATGATTGAAGTCTAGTGCCATTGATCCATACCCACAATTCCCATCTGCATGTATCCAGAAAGCAAACATTAATTAATTAACCACTATAATATATATATATATATATATANNNNNNNNNNNNNNNNNNNNNNNNNNNNNNNNNNNNNAACATCATTATATTGATCTAGGCCAATCCCAATTTTCATTTTCATAAGCTATATATAGAAAAACCAAAAAGGGAAAAAAAAATGATCTATATAAATGCATGCATATGCTTACATGAAAGTGCAGAGTCTTGGGAGATATAAG…
G1_V2_SSR_18360	p2	(TC)16	32	AAGGTATAGCTCCTAGAAATCCATCTATTCCCATTCTCCTGCAAGATTTATTGTTCTCCATTCATTTTGATGGTAACAGATTTCTAAGAATGGATTTCTTGATTGGTTTAGTGAATCTACTTCCCTTGTTTTCTTTTTTCATTTTCTTTTTGGAAAAAATTTCTTGTATTCACTGACTTTAGATGATTTTCTATAGTCATCTCTCTCTCTCTCTCTCTCTCTCTCTCTCTCGTCTAGGGTGGTGGTTGCTAAGCAGGACTGGAACATGAGCCTATTATTGTTACATCCAACCCTCTACTACTATAGTCAATTCTCATAGTCTTCTATGCCAATATAGATGTTTTAGAATCCAAACAAGCTGGATCACAAACTGTCTGATTCAAATATTGGGGATGGACA…
G1_V2_SSR_13607	p2	(AT)6	12	TTGATCATATTAGACATGCATGCTTTGTTAATTTAATTTACCCTTATCCATTTAATTTTTTTGTGGAACATCAAATACTTTGCCTGACGTTTCGAGTGTTAATGGATATTTTTTTGAGATGTGGCGCTTAAATTTTTGTAATATGAACGGTTGTGATACTTTCATTCCTAAGCTTTAGTAAAATAATAAATCAGCTAGAATATATATATATNNNNNNNNNNNNNNNNNNNNNNNNNNNNNNNNNNNNNNATAGTATAATATTATTAAAAACTAAAATGTTAACACTAAAAAAAGTTTATTTTAATTTGTTATTTTTAGAGTGTTTAAAAATGAAAATATTATTTACTAAATTAAAATGTTCACAACAAGTTGAAGTAAATTCATATACTAAAATATTTT…
G1_V2_SSR_27294	p3	(TAA)11	33	TTATAAAGGAGAAAATTAACTGTTTTATCTTATGTGCAATGCAAGAGCGCATCAGACAACAAATTGCTCAAAGACCATATTCCTATCAGTTGAATGGCTAATGGCAACCTGGTTCTTGATACCAGTATGTAACCAGGATTTAAAAACAGAGTAATAATAGGATTTTAAAACTGATAAAAGAAATTATAAATAATAATAGTAATAATAATAATAATAATAATAATAATAATAANNNNNNNNNNNNNNNNNNNNNNNNNNNNNNNNNNNNNNNNNNNNNNNNNNNNNNNNNGAGTAACAAATAATTTAACATTATTCAAGCAGGTATTGGAAGATTGCTGCAAAAATTATTCAAGAAGGATTAGTATTATGTAATATGCATAAAGTTCAGAAGAAACTAAA…
G1_V2_SSR_13359	p2	(AT)10	20	GGGAAAGTGGTGTGAATTTGAATACCACCATTGCTTCGCATGTGATTCCATCTATGATCATCGATCAATTTCACCACTTGTTTTCTGCACATAATATTCAGCGACATCCATCAATGACGAAGAAACCACCATACGTTATTTTAGATACGTGAGCTTATATATGTTCTATATGTTTAAAGCATTAATCAATGAAATAAAAATATATATATATATATATATNNNNNNNNNNNNNNNNNNNNNNNNNNNNNNNNNNNNNNNNNNNNNNNNNNNNNNNNAAAGACTTTCGTTCCAATCCTTAACGGGTTTTGATTGATTAATTACTGCTAATTAAGTGCAGAACTCACACTACTTCTCCCGGAGAGTTATAAATATCAAGATATATATAAATACTTATACGGA…
G1_V2_SSR_16761	c	(ATCT)8cagtcagaaagggtccccctccaatccgttttccactctacccattaaacccaacaaacacaaatttttca(T)10	113	CCATAGCCAAGCTAGCTATAGCTAGACAGTAGATAAAGAGAGAGATTATTATTATGTGAAGTGGAAGCAAATATTGTTGTGTCTCATCTCATAGAAATTAATAATATTTATGATGATTACCTTGTGAGTGAAGAAAAATGCATCGAAAAAGACAAGTTTGAGTCAAAGACAAGAAGACCAACCGTCTCCCTCTCTTTCCATCTATCTATCTATCTATCTATCTATCTATCTCAGTCAGAAAGGGTCCCCCTCCAATCCGTTTTCCACTCTACCCATTAAACCCAACAAACACAAATTTTTCATTTTTTTTTTCTCTTTAATTTCCTGAATCCTCCCTCTCTCTAGAGTTCATATTTCTAAGCAAACCCCACAACAATATATCACAATCATCATCACCAT…
G1_V2_SSR_1014	p2	(AT)8	16	ATTAATTTATTTATAACCTTAATTGAAAGTTCTCAAAATTGATAATACATGATCCCTGACTTTTAATTAATTTAACAAAAGTCCAAAGATTTTATCATAATAATTCATTAAATAACTGCAACTTTTAATTTATTCGATTATTAATTAATTGTTATATATATGCAACCTCAAATAGCCTTCCCCAGATGATACATGAAACATATATATATATATATANNNNNNNNNNNNNNNNNNNNNNNNNNNNNNNNNNNNNNNNNNNNNNNNNNNAAATTAAATTTTAATTAATTAATTAAGAGTTGTAAGTTAATTTGAACAAGTGACGTATTGCATCCTCATTACGCATGTTGGTGTACCAAGTAATTAAATTATATAAAACAATAATACAGAATGGACCCTTAA…
G1_V2_SSR_37317	p3	(AAT)15	45	ATTTTTTCTTATGGACATGTAAAGAGTACTTTTTGTTTTGGAATTAATTCCATAATAATTGTATGTTAATATCATAAATTAGTGTGACTATTTTTCTTTTAAATTTCCATAACAAAAAGTCTCTATCTTGGAAAATCATAAATATATTGGGTCAGTTAATGTGTTACTTTCCCAATTGGATAATAGTAATTAAATATCCAATAATAATAATAATAATAATAATAATAATAATAATAATAATAATATAAATCCTTACCAAATTTGAAATGGGATGTATTAACCTGTCTATGCTCAATTCAGAATTACATAAATTAATAAATTTATTACATTTAGAGCAAAATTCTCCTACTTAAGGTATTCTAGACATTCCGAAAATGATATTTTAATTACACATTGAGT…
G1_V2_SSR_5470	p2	(AT)9	18	AGAGGTTTGAAAAAGGATGATTTTATGTTTAATTCAAAGCCCTATTGACTTCTTCTTTGCAACTTTTTCTTACTTCTGCTCTTTTTTTGCCACTACCCATTTTTGACTTTAATATTAAAGTTGATTTTTGAATATTAATTTTTTTATTATAAAAAATAAACTAAACTATAATATAATATGATGTCAATCCTATATATAAATATATATATATATATATTAATTAGATTACTGAACATCCAAAAAAAAACACTAAGAAAAAACTTTATAATTTTTCAAAAAAAATTAATCTTAAACATTCATATTTAACATAAGCATGTTTGAGCGAAAACAATATTGAGAGAAATTGAAAAATAAAGATAATATGAACAAAATGTTTGCTAGCTCTAATTTATTTATAAT…
G1_V2_SSR_20983	p2	(AT)7	14	ATTAAAGCTTAATTTTCTAACCTTTCATTATCAATTATGATCATCCTTGTATTTAAGTTTAGAGAACTGATTGTCAATTCATTATTGGTATAAAAAGTATTTAATGCCTACAAATTAACTAACTTGTTAACAACAAATTTCATATTTAATTATAAAAGCACACCAACCTACCCCTCCCAAAACTTAATTATATTCAACCATATATATATATATGAGCAGAATCAGCAATCCTTTTATTTTATACAAAATTTTACATCAATTGTAAACCGTTGAATATAAACACATTCGACGGTTGAAATTAATATAAAATTTTATGTTAAATAAAGAGGCTGCTAATCCTACCATATATATATATATATNNNNNNNNNNNNNNNNNNNNNNNNNNNNNNNNNNNNNNNN…
G1_V2_SSR_23090	p2	(AT)6	12	TGGGTGAGGTTGCCTTTTGCCTCTCAAGTGACAAGGTCTTATTTGACCATGGTACAGCCTGTAGCCCCCTTCTAGTTTGTAGCTGGTTCCCGACCTACTACTTGGTATTTGGTCAGCCCAAAATGCTCCCTGCCCTCTGGCAGGTTCAAATATTGTTCCCTTTCATGTTTTGCTATATGTACAGTTATTTTTCATCCACATATATATATATGGTTCATGATTAATATAATTCACATATATGAAAGATTATATGTATAATTCTTTGTTGTGTTTTTTTTATTTTCACTTTGTTAATAGAATAACTTGATGGATCATTTGGGTGCATAAACATTGATCATATGTCAAATTATATTTATAAACTAAATGAATTAACTTTTGATATCAATCTATGTGTTATTG…
G1_V2_SSR_53247	p2	(AT)10	20	GCCAAGTGTCTCTTACTCAAAAATGGCTTGCTACTTTAAAGCCAAATGTTCGTTTAACAAATATTATTTGACTGATACAAGGCCAAGCGTGGCTTGAGAAGATGTTTCATGATATTTAATTTAGAACGTTTAAAATAATTACAAATATTTTATATTTATCTAAACTTGGGTATTAATTTCAAAAATAGTGCTTTTCAACATATATATATATATATATATNNNNNNNNNNNNNNNNNNNNNNNNNNNNNNNNNNNNNNNNNNNNNNNNNNNNNNNNNCGATCGCAAGAGAACTAATTTAAATAGATAAATTTTGATTACAAAGAAAACAAATTTAGGGACTTCGTCAAGTTTTATATATACTTAGAAAAAAAATTTCACTTCTAGAATGTTATATGATAA…
G1_V2_SSR_12934	c	(CT)7cc(CT)11cnnnnnnnnnnnnnnnnnnnnnnnnnnnnnnnnnnnnnnnnnnnnnnntttaattaac(AATTAA)5acaaagacaaagtaagaaagagaaagacagtgtgtaaatgtatgaatgttaatgtgtttgtgtttttttcttttcttttt(A)10	216	AAGAAGAAGTATGGTGAAGAAAGGAGAAGAAGAAGGAGAGAGAGAGAGAGAGTGCGTATGTGTGAGATTTTAGAAGAGAAAAACAGCACCACCCACTCACACATCAAAAAGGGCATCAGGTTCTCTCAACCAAAAAGCTATTTTGTAAAAATTGTAAACCCCTGTTAATCACCACGATTCATTCAACCTCCCCAGCTCACTCTCTCTCTCTCTCCCTCTCTCTCTCTCTCTCTCTCTCNNNNNNNNNNNNNNNNNNNNNNNNNNNNNNNNNNNNNNNNNNNNNNNTTTAATTAACAATTAAAATTAAAATTAAAATTAAAATTAAACAAAGACAAAGTAAGAAAGAGAAAGACAGTGTGTAAATGTATGAATGTTAATGTGTTTGTGTTTTTTTCTTTT…
G1_V2_SSR_3701	p3	(AAT)13	39	GAGAGACTCACCAATTTTTAAAACTTTTTGGGTCTGAGTAATTAATAAGTAAGCAATTTATTATTTATTTTTATATATATCAAGCTTTTTAGTCTATTGGTGGAGCTCAACTCAAGAATTACTTTCATGAATTTATTTAATCTTTTAATTAGGGTCTAAGAATAGGCCGAAAGGTATTTATATTATATTGTTTCGTTAAAATAATAATAATAATAATAATAATAATAATAATAATAATTAACAAAAGAAGAAGAATATGCATTATCCAATTGCATATAATTATGGCAAAAACTGAAAGGCTTTACAAAAGTTAACAAAAAGGCTACACCAATTTTAATTGCTTCCCAAGGTCGGCTTGCTTTTTCATCTTCATTCTTTCCATCCATTTTAAACATCATC…
G1_V2_SSR_36395	p2	(GA)6	12	AAAACAAGAACCGGTTTTGATTTCTCAGGTGAGATTTATGGTAGTTTCTTCAGATGGGTTTGATCAATTTTGAAGAGAGCAGTTGCAGAGATTTGAGATTGAGAAGAGAGAGAGAAGAAATGACAAGGTATGAAGTGAATGGTTGTTTCTTTTGTGTGAAGTATATGTGAGAAAATGACACTTGAAGGGGGCTATAGGGGAGAGAGAGAGAGNNNNNNNNNNNNNNNNNNNNNNNNNNNNNNNNNNNNNNNNNNNNNNNNNNNNNNNNNGGGTGTAGGGTAAGGGGTACTAGGGTGAGAAAGTAAGAAAAAAGATTACAAAAGAAAGAAAAGTAAATAAGTTTGAGGACTTGATTCCTTTTTTTACTACTCTCTCTTTCACTTTGTTTAATTTCCTTTT…
G1_V2_SSR_58041	p2	(AT)11	22	GACTTTAGTATATAAATAAACACATCACATTATATTATTGTTTATAAAAAGACATAAAAATGTAAATATGTCCTGTTTAATAATTAATACCAGGATCAGGCACTGGAAAACGCATCTATGTATTTGACTGATCATCATGTCGAAAGTAAAAGGAAGGCAATTCTGTCACGATGCCTCGGCTTATTATAAAATTATATGAATATATATATATATATATATATAATAAAAATTTATGGCATTGGCGAAGTCCACGGTCAGTTTTTATATTGTTTTTAATAATTAAAATAAAAACATAGTTGTCGCCCACCTATGAAAGAACATTTATTTATTGCAGAAACACGTGGAATTTGGAGCCTTTTGTCAATTGATTTCTGAAAGTCAAATGTCAATCCGCAATAA…
G1_V2_SSR_29604	p2	(TG)7	14	GTTGTAAATAATTAAAAAAAACCATGCCAGTACCATTAATTTTTATATAAATAAAAAAATGAAAAGAATAGCATTTGTTTATTTATCTTTTAACATATATCACGTACAATATTAAAAATAACTTCTTCGTGTCTCCAAATTTTCAAAAATGGTGGACAATTTAAAGCCGATAAAATATCAGCAATTATATATATATTTATGTGTGTGTGTGTGCGTGCGCAAAAGAGAAGATAAAAGAATATTATTATAGTTTCTATAATACATTGCATGCACGAAATTTTAACTTCGTTCTGAGTATTAATTATATATTAATTGTACCTATTTTCTTTTTTAACTTACAGATGAGATCAGAATTAATATACATATTTTGTCCATAGATAAGGACACTAATTTAAAGAA…
G1_V2_SSR_12726	p2	(AT)9	18	GTACTGTTTTTATATAATTATGCAATTTCTAGCCAAGACATTAAAGCTCCAAATGTGGAGAAATATTGTGGGGGGAAAATGGAGGAGGGACTTGCAGAAGAATTAAATTAGATGTAGCAGACTGCAGTACTTTCAGGAATTCAGCTAAGATATACAAAGCAAACTGGGTTTAACGATAATGTAAACCTATAATTTAGAAATATATATATATATATATANNNNNNNNNNNNNNNNNNNNNNNNNNNNNNNNNNNNNNNNNNNCTTTCTGACAGAAGAAGAGAAACCACTTGAATAATGAAATCTCAGAGAGCTCTAAAAAAAGAAGTTGTAACTATACAAATACAATTAATTTCTTCGAAACTCATCCATTACAGATTAATTAATTAATTAATTACCTGG…
G1_V2_SSR_15629	p2	(AC)6	12	TGAACATATCCATCTAGAATAATAAAACTTTAAATTAACTGTAAAATAATGATTAAAATTTAAATTTTAATTAGGAAATAAATTTGTCAAAATTTAAAAATTTTATTTTTTTCTTTTGATTACTTTTCTATTTCTTTTTCACAAAATATAATTAAAAAATTTATATTTTTTATTATAAATTATGCTAAGCTATATATATACACACACACACANNNNNNNNNNNNNNNNNNNNNNNNNNNNNNNNNNNNNNNNNNNGTATATTTTGTTTATTTGTATTACTATATTATTTTAATAATAAAATTTTTTAAACACAAATTCAAAATACTTTTAAGAATAAACTTTACTAAATCATTAACTAATTTTCCTGATTATTTCTTCGACAAAGCAAAAATATATTTA…
G1_V2_SSR_5263	c	(T)11cttatacacgcgatatc(TCA)7	49	AACTAAAACAAGAACGAGAACTGGGTCTTGCGATTTGTACGTGGTGGTTAGAAAATGTTAATTATAAGCTAGCCTAGCCAGTGCCGCTGCCACCATACATATACAGATATAGAAGAAGTCGTTTATTTGATTCATCCACTCATTTCAAATAATAAGACAAGACAATATAATTAATTCTCCGAGGTAGATTATATATATATTTTTTTTTTTCTTATACACGCGATATCTCATCATCATCATCATCATCACTACATCAGACGTACACTTTCAATCCGACATACTCCAAGAAATTTAATTCCGCCGGGGGTTTTGCAATTAAGAGAGTGAAGCATCAATTGATGTCATTGCAGTTAAGAAAGTGAAGGAACTGGCCAACATTGTGGTGGGTAAGACCAATTT…
G1_V2_SSR_21113	p2	(TA)6	12	GCATGCATAAATGCATTGTCCTTAAAGAAAATTTTTGTTCTTTTAGGATAATAGTATTTCTTTCAAAATATAATGGCCTTTAATTTTACATAAACTCCAAAATATAGAATATTTAAATAACATAAAAATCAAACACTATTCTCTAATAATTTTTGTAAAATGACGAAAGATCAAAAAAATATAAAAAAGACATTTTTATTATATATATATATNNNNNNNNNNNNNNNNNNNNNNNNNNNNNNNNNNNNNNNNNNNNNNNNNNNNNNGAAATACCTACCATTTTATTTGAGACATGTTATCTTGTTAACACCATTTAATTTTATATTAACTTTTATAATCATATAATTAATTATATGAAAATTATATTAATATGATTACACCAATATATATATATTTTGA…
G1_V2_SSR_16764	p2	(AT)9	18	AAAATATAATTAAACCATTTACATATACATACAACTTGCTTGTACAATTGCCCTATATATATATATATACACACACATATGTCTTCTATTTCATTTTCAAAAGGTATAATTCCCGTGTCTTCGATCGAGCTCTGCATACTTTATAAATCTCGATGAAATTAGAAAGTTATATATGATCAGTTGGTTAATGATAAATGACATATATATATATATATATNNNNNNNNNNNNNNNNNNNNNNNNNNNNNNNNNNNNNNNNNNNNTGCAAATTCACATTATATATATAAAAAGCTATAACAATGTTCAATATATATTATGTTCGTTCCTTTTATATTTTTCAGCTGGCAATGCAACTTAAAACTTTGCTTAGAAATTCTACTCATGTCTATAGTAATATATCT…
G1_V2_SSR_37401	p2	(TA)8	16	TTAAGCGTAATACTAGTCAGGGATGAGAAATTTTGTTAGTTTGTCATGTCCCAATTTTCCTTCTCCTTCCATTGATTATGAGTTTTCATACTCTGTTTCCTCTGTTCCAGAATATATAATTCGATCCCCGATGTTCTCATCACCATCCTAAATAGAATAATTGTTATGTTGACACCCTGGCAGTGATATTACAGAATTCTATATATATATATATANNNNNNNNNNNNNNNNNNNNNNNNNNNNNNNNNNNNNNNNNNNNNNNNNNGATATCTGAGGTTGAGTTGAGTATTAGTACATGAAGTTCTGCAAAGATATAAATTGCGACGTGTATCTGTTTATATATTTCTTACAATTCATTTGCTTGAATTTTCAACTCTTACACAGGCAATCGACCGAACT…
G1_V2_SSR_16098	c	(GTG)7tttgtggttgttgtagtaaccccgttgtattgtcccttaattcggataatattttgagaaataatttaaaagtca(T)10	106	TTGAATATAAATATGTTATTATTACCAAAAGGCCCAATCATTTAATCGAGACATGATTTTGTAAATAAGTTTTTATTAAATAATTGATTTTACTTAAAAGTTAAAACTGTTTTTGACGTTTTGACATAGCCCCCTGGTGGGCTACGTTGAACTTTTGGGCCAGTTCAAATGTAGACCTAATAATAATAGCGTGAATGTCGTGGTGGTGGTGGTGGTGGTGTTTGTGGTTGTTGTAGTAACCCCGTTGTATTGTCCCTTAATTCGGATAATATTTTGAGAAATAATTTAAAAGTCATTTTTTTTTTGGTTCAATTTATCAAAATAAATCTCTTCTAATATTTTGCACTAAATTAGTCTAAGATTTTCTTTTTAAACAAAATTACTCTTTACTAGTCATTA…
G1_V2_SSR_4630	p2	(AT)10	20	AAACTGTGCATCCATCTTTTTCTAATATAAAACCAATGATGTATTTCTGGTCTTACAGCTTAACATACGCGCCGCGGCTTCCAAAATTTTCTTTTTAAGTCCTGATTTCACTCTACCGGTGTGGCTATCTCAATTACCAATTGATTAAGCCCCTTTGCTTGAACTGCATGGCTTGAATCTTCGCTAGCATAAATTAACAATATATATATATATATATATANNNNNNNNNNNNNNNNNNNNNNNNNNNNNNNNNNNNNNNNNNNNNNNGTGAAGAACTTCAGATGGATTGCTTGGGGAGAACTTTTCAAATATATTCTGCCTATAGCTCTTGGAGGTGCACATAAATACCAACACCCAAAATGGGAGGCAAAAAGTCGAGTTATCCGGACACCAGTGATT…
G1_V2_SSR_54216	c*	(AG)8(AGA)6*	32	CGAATGTTTTACCAGAAACCCAATTTGTATAATCATAACCGTCAGTCCAGCCATTGCTGTCACCAACGGTGTACTCCACGGCATAGACGGCCGGAGCAGCCAGCAGGAGAA*GGAGGAGA*GCCGCTGTCATGTTAGCCATGTTAATCAGAAGCTGTTTCTATGCGTATAAAATAAGAAGAGTAGGGGGA*AGAGAGACAGAGAGAGAGAGAGAGAAGAAGAAGAAGAAGAAGT*GCTGATCAGTTGCAAAGCGCTTTTGGGGATGTTTCATGTTATATAGAGATGAAAGTCTTCATCTCTCTAACTGGATCATATTTGTTTAATGCATACTTTCTTTCCATTCATCTATACAATACAACTAACACCATAACTATACATTTGTTTAATTTGATTCATCT…
G1_V2_SSR_34798	p2	(AT)9	18	AAAAAGGGTCCAACATTTATACTTTTTTCTTTTTCTAATCATACTTAATAGATTTAGCATCAATAATATTTATCTTGAGTTAATTTAAATTATGCACTCTCTCTAAATGAAAGATAAAACTAATTCTCTTAATTTCATAACCTATTTTTAATCCTCTCTTTAATAATAATTTAGATATTTAGATGTTGTTTCAAAAGCAATATATATATATATATATNNNNNNNNNNNNNNNNNNNNNNNNNNNNNNNNNNNNNNNNNNNNNNNNNGTATGCATGTACACATGACCAAAATCAGAAAATGCATCGGTGGGGAATCTTAAACCAGGTGAGTGGATATCCCACTGTAATGTATATGCGCGCATATGTATATTATACCAACATTAAGCTCAATTAATTAGCT…
G1_V2_SSR_1856	p2	(AT)7	14	TAATATAAATCATTAAATGAATATCAATTTAGTGGTTAAAATTTTAATGTAATAATTTGAATAAAGGATGTGGTGCCAGGGATTTTAGTAGATATTTTTTCTTATAGACATTTACATATTTTAAAATACGGTGCATATATTTTGTATGTAAAAGTAATAATATATTATATAATGACTTAGAAATAATGTGTGTAAATAAATATATATATATATCATTTCTAAGTCATTGATTTAGACACATTCAACAGTTAAGATTGAATTTGATCATGTATTAAAATTTAACGGCCTACAAATATTGTAAACATATGTGTAAAATAATAGGATTATATATATATATATAGAGAGTTAATATTAATGATCTTTTTTTTTTCAATACGACTTTTTATATCAATTATAAAC…
G1_V2_SSR_62768	p2	(AT)8	16	TATATATATATACACACGCATTAAGAGATCTCTCACGCTTGTTGCTTGTTAATTAGCCGAGTAACTTGAAAATATTATCTTGAGTAATACGGAATATTTGGGTTTACGCTTACTTAAGTTCAATCACTTCATCCACTTTATTGCATTTAATCAAAATATCTTCCTATTCATTTTGTTTAATATTATATTATATGTACATATATATATATATATGTGTATGTACGTATGTTACGAATTCGCTTAAAATTAAAACATGTTGCAAAAATAACAAATCAAGTAAATATTACTTGATTAAGATGGTTAGCTAGTTCTCGAATTTTTTACTTATTACGGAGCAAATAATAAATATATAAAGGTCTAATTGCTCATTTTAGCAATTAGAAAAACTAATACGAGAGA…
G1_V2_SSR_29986	p2	(AT)8	16	AATAATTTTATGTGACAAATATGACTTAAAAAATATAATAACCGAACCTTAAATAGATCCTAAATTAATTACACAATATCGATATATTTTCTTAAATTTTATTAAGTTAAACAGTAAAATTGCCTTCATTATATTGATTTATTATGTGGTCTGGTCCACAATATAAAATTAAGTTTTATATATTTGTACTAGACTCTACATATATATATATATATGTATATGTAATATTGTAAATTTATTACGTTCAATTGTAGAATAAATTTATTGTATTGAATTATAATAATTTAGAATTTCTATTTACACGTGGAATAAGACGGGGTAGGATGGAGCATGAGCTGTGAGATAAAATAATAATGGCAGTGTCAGATATAATTTTCTATCTTATTGGGCCTATGGGCC…
G1_V2_SSR_28724	c	(TGAGTG)5tgagtatcttcttcttagtgaccctacggattctctgcatcgattctcattgatgcaagagaaagcctaaagtattagg(A)12	121	GGGATGACATCAGATCGATGAGGAGATTTCGTTTTAGATAAAGTGGAAATGAAAAGTAAGAGAATAGAGAAGAATACAGATAGCTTTAATTATGAATATGTTCGCCCCACGTTAAGTTGCTCCCGGAGAATGTAAACTTTTAGTTTTGTTATACATCTTTAATTTATTCGGTCTTCTCTTTATTATATATTGTTGGTATTGAGTGTGAGTGTGAGTGTGAGTGTGAGTGTGAGTATCTTCTTCTTAGTGACCCTACGGATTCTCTGCATCGATTCTCATTGATGCAAGAGAAAGCCTAAAGTATTAGGAAAAAAAAAAAANNNNNNNNNNNNNNNNNNNNNNNNNNNNNNNNNNNNNNNNNNNNNNNNNNNNNNNACTTTCGCTTTTCCTTTCCTCGAT…
G1_V2_SSR_3039	p2	(AT)9	18	TGTAATTAATGCAATTAAGAAATTGGCATCTTCCCCCTATTCTCACTACTTGCTAGCTAGCTTGCTAAAAGAATCTTTTAATATTTTCCGTTTTTGCCTTTTCTTGATGCCTCGTATAATTCCAATATAATTTTTCTCATGCCATTTCTAGGTATATATCTACGTACATACATCTGCTGTTCTACCGACAAATTTAGGCATATATATATATATATATNNNNNNNNNNNNNNNNNNNNNNNNNNNNNNNNNNNNNNNNNNNNNNCAATCTCGCACCAAATCAACATTCCATGTCAAATATAATACGTATTGAATTACAGCAACCATTTTCTTTTCATAATAGTCGATATTGACGTGCTGCTGAATTCAAAATTAACCTATATCTCAATGTAATGCAATGC…
G1_V2_SSR_13237	c*	(TTCT)6(T)10*	33	GAGAAGAAAGCTTATATTTTCGTTTTCGAAACTTATATTTAATTTAAAAAGTATAAAAGTCATCAAAAAGTTAAATAAAAAAGGGTAAAAGATATTCTTTGTGTCTTCGTGAACAAAATTAAAGGAACATTATTAATTTTTTCATGTATTTTAGTACATAAAAGTACAAACATGCATGGTTTTATAATTTTTAAAAATATTCTTTCTTTCTTTCTTTCTTTCTTTTTTTTTTNNNNNNNNNNNNNNNNNNNNNNNNNNNNNNNNNNNNNNNNNNNNNNNNNNNNNNNNTTAGGCAGAACAGGAAAAGATAAAAACCTCTATTATGATTAAATATATATATAGTGAGTTATTTTTACTTTCAATTATTCATATAACAAATTTTAGTTATTATCTAATTGA…
G1_V2_SSR_35804	p2	(AT)10	20	GGAAGGAACAAGAAATGCTGCCCGGCAACAAATGAAGAAGAAAATGAAAAGCGATGGCCTAATTGAAGGCCAAAATTGGGATATAATTAAGATGGATCTATCGGTCAACTTATATAATTAATATTGTATGAATAAGTAGTTAATTAAAGTTTTAATATTTCAGATATCATCTTCTGCATTATTAGACTGTTTCCTTTGCATATATATATATATATATATNNNNNNNNNNNNNNNNNNNNNNNNNTTAAATTATTCCGAAATGGATGATCAATTTTGATGTTTGAGAATTTCTGCAATTCTACAATATGTACTAATATTAATTAATATACAGGTGATCGAGAGAGATTGTTTTCCGGTACTGTTAAATAATTAAAATTAATTAATTTTATATATAGAAAA…
G1_V2_SSR_12602	c	(AT)6nnnnnnnnnnnnnnnnnnnnnnnnnnnnnnnnnac(T)11	58	CTTTGAGAAAGGTATGTAAAAATACCTCTATTTGATTATTATGAAATAGTGAAGAATATAAATTATTTACAGGAATGAATTGTCGTTTGTTCGAATTAATTTATCCGAATTATTTGATTAACTTGGTCTATGGAGAAACTAGAAGTGCAAATAAGTTGAATTAAATGTAAAAGATATAATTAATCACAAAATAATATACATATATATATATNNNNNNNNNNNNNNNNNNNNNNNNNNNNNNNNNACTTTTTTTTTTTACTGATTTTATATTTTATAAGAGAAGAAATTAACAATTTATGAGTGATGTGTAGATTTATAAAATATTTTTAGAAAATTAGTATTGATCAATAAAATTACGATAAATTAATAAAAAGTGCAAATTTAAGAATAAAAATATTT…
G1_V2_SSR_23345	p2	(AT)9	18	CCTACAACGTCTCCTACTTTATACTATTATATAATATACGTACATAAAATATAAAGTACGTAATTGGGACACTCGATCCCCTATTGGCCAATCAATTAGTATTAATTGTCTATCCGATAATTGTATTTAACCCAGATGAAATATTATTATTGTCGATTAGGATATTATACTAGTATATATGAACTTACATACCTTATACATATATATATATATATATCAATTTATTTATGTACTTTGGATAAGACAAAATTTATTTTACTTTTAATTATATTCTCATTTATTAATTAACTACTAATTATCTCATGTAAAATTAGTTTTGATCATGGTAGAACCTTAGTCATTGTTACATTGATTAATGTATTAATATTGTAATATTTTATCACTAAGTGTTATATATAG…
G1_V2_SSR_19961	p5	(TTTTC)6	30	TATGATAAAAGATTGAAAAGGAATAAATAAAAGGGTGACCATTTGGTTAGCTTTGCTTATGGAGTCTAGCAAAAGAATCTCTATTGAGAATCTAACATTTCCTATCAAAATTCATCATGCCTAGGCATGGGCTCATTGTGCGGTACATATCCAAGGATATTTCTTCGTTCAAAAAGCAAATGATAAAGAAAAGAAACCATTTTCTTTTCTTTTCTTTTCTTTTCTTTTCTTTTNNNNNNNNNNNNNNNNNNNNNNNNNNNNNNNNNNNNNNNNNATGAATATATGAAAAATGATAATATTTTCGGTTTACATTACACCTATAAACTTTAACATAAACTTTTATAATAAAATATCTCAGAATATCTATATATTCTCGATCAAGCATTATAAAGCAATTAA…
G1_V2_SSR_55811	p2	(TG)7	14	AGCAGGATAATTATGTCATTATAATGGTCAAAGGTGGTCAAAGTATAACAGAGACGGAAAATTTTAACGGAAGAGATGTTACTGACAAATATTTTCAACTTGGGTACCTACTTGACATTTATTTTCAAAAACAGGCATCACACTGTCATTCTCCCAATAAATAACAATCCAAACTTAATCATCTAAAAATATTTATGTTTGTGTGTGTGTGTGCGTGTGCGTGTGCGTGTGCGTGTGTGTATTTAAACACATATCTATTTAAACAAGTTAAGGCAGAATGGGCGGAGCATGAAGGCTTAAACCAAACTCTTACAAAGTAACTAGATCTTATGCCTAGGCAAGCATAAAGAATTCACGTCAAAAGATAAAGTGAGGCTAAAGTTATGATATTAAAAGAGA…
G1_V2_SSR_47264	c	(AT)8a*(AG)6	30	GAAAGTAAAATGTTCGGGTGTCTGAAATCGAACAATTTAACCAATTTATTAAGATG*AAAAGGCCAAGGAGAAACTGACGCTGCATTC*TTCGAAGCTAGGCTGCAACGTGATGCCCTTTTT*CAACGAAGAAACATTTTA*TTGCTCTTGTTCATGTATCA*TAATGGCCAGTCATATTTGTTGACTTACAGCAGTACATATATATATATATATA*AGAGAGAGAGAGACAACG*CAAAATCTTTATTCTGCTGTTTAGAGGTTAAGGTTTTGCGG*AAAATCGGTACTTTTC*ATTCCTGGCTTCATTCAAAAGAATTCTATGTTACATTATCAGGACCAAATATCAATCTGGCTTTCTACTTGTACAAATCAAAATCACACAATTGTTATTACTAA…
G1_V2_SSR_26458	c	(ATTA)5atctatttac(A)11	41	AAATGAGATATCAATATCATTATCATTATCATTATCATTATCATTATCTACCAATAAATATTATTACTTCACTCAACATCATTGAATTATCCGCACGATACTATCAATTGCGATTAGGCATCATCTATAATCAAATAGAATTTTGCAACAGAAACTTTACCTGGGGATCAGACGATCTGATATGGTGTGATCTACATATATTAATTAATTAATTAATTAATCTATTTACAAAAAAAAAAAGAAAAGATTATAATACGTTACGTGACATGACAAATGCCACCTGCAATTCAAAAACAGATTCCCTTCATGACTAGAATTCCTCGAAAACGATGCCATAATTTCTGCCTTTATTTTTGGCTTTTCTTTTTTTTTTTTTAATTATTTTCCAAAAAGAATTTT…
G1_V2_SSR_30635	c	(TATC)5aatctgagtatgaaggaaagaaatgaggtgaacatcgattgactacattatcatacttaa(AATC)6	104	CCAATTAAGTGGGCATAGTTATTTTATATATCATGGCAGCATATCTATCCATTTTGGGGGACAATATGTAGGAATTTACGATATTTATTGCTTTTGCATTTAGTCTTCCTCGATGGAGTAAAATGTTGACGCAACTTCACTTAGGCATGCGACCTCAAATGAATGGTCAGTGATTGAAAACCTTAAACCTAAGGAATAATATCTATCTATCTATCTATCAATCTGAGTATGAAGGAAAGAAATGAGGTGAACATCGATTGACTACATTATCATACTTAAAATCAATCAATCAATCAATCAATCACAGAATGTTACATTATGTGCACATTTATTATCATCAAAAGGGTTAAGCCAAGTACGTAGTAATGAAGGTGATACATGTTATGGTGGGTGAAGCAG…
G1_V2_SSR_16809	c	(TTTC)7tttttttc(T)12	48	GCATGATATTTGTATGTAATTGCATTTTAGTTTATTCGTAAATACACAACAAAACAATATTATTTGGTGTTTGTATTTGGATGTTTCTGCCCTATAATTCTCCCTTGAAGTTGTCATATGGGCCATCCACATTCCACATTCCACATTCCACCACAAATCTTCAATACCAATTACCCATTTCATTTCGTGTTTCAGCACTTTTCTTTCTTTCTTTCTTTCTTTCTTTCTTTTTTTCTTTTTTTTTTTTCTAAAATATTCTTTTTACTTACTTATTCATGGGTCGAATTCAATTTGGCATAACTACGTGCTATACTAAACATAAAGAATGATTGAGCGTGCATGCCATTGCTATGCTACATGCATGCAGATGTAATGCTTTTGGCCTTTAATAACTAATGA…
G1_V2_SSR_14204	p2	(TA)8	16	CTAACTCAGTTGCTTCTTCCCCTAAGCAATTTACAGATACTTTTCACATTTAATCAATCATCTCCGCTTTTTTCCCAGTTTCCAACACCACCCCTTCCTCTGTCTTTTGCTTACTTTTAATTTTGTCAAGCTATTTTCCATATATACATGCATGCATGTTGGACAAAACTTCCCAATTTTTTTGTTTTCTTAATTTGTTTATATATATATATATATNNNNNNNNNNNNNNNNNNNNNNNNNNNNNNNNNNNNNNNNAGCAAGCAGCCCATAATTTGTTGTCAATATATATGTAGGGAAACTTGATCCTGAATTTAGTCCTTTTCTGCTTGTATTTATGTGTGTATATATCAAAATATACGTACTGGAATCCCATTACAATATATTGTCTTCAAACCTTA…
G1_V2_SSR_62394	p2	(AT)11	22	GGGTGTTGAATTATAGAGCCATTAAACCAGTCAAAAAAGGAAGGCAGGATGAAGAAATTTGTAGGCTGTTTTACAAGAATCAAGGGGCTTGCTGAATATTTGCTATGATTTGGAAGAATATTTTAAGGAGAAGTAGAATTCATGATGATAGATTGATTACAATATATATAAATGTTATGCCAACTTTAACCAGCTAAGAATATATATATATATATATATATTATTTCTTACATTACAGCAGCTGCAAACTATATATACCTTGCTTACAATTTAAGTTCAACTAGTGTGTGTATAATATATATGAGATAGGATCAGCAACCCTTTTTTTATATAAAATCTTATATCAATTATAAACAGTTAGATATACGTACATTCAATAATTGAGATTGTATTTGATTA…
G1_V2_SSR_26708	p2	(TA)7	14	TTGTTAACTGTTCGGATTTTTTATGACCTTAAACTCAAAAATTTAATTCTTTACCACTAACCAAATTTAATCAATAATTAATTTTATATATACCATTTTATATATTATCAAAACATTAGATGGATGAATAAATAAATAATGATTAAAATAAAATTATCTAATAAGAAATAAATTTCAATGAAAAATAAAAAGAATAGATTATATATATATATAAACATAATTATATAAATGGTGATATAATATTAATTTATATAAATAAAAATGTATAATTTTCTTTTATTTTGGAAGAAATATTGTTTGAAAAATGTAGCTCTCACTGTCATTTTCAATGAAATTCTACGTAAGCTCGTGTGTCCAATTTCAGAGAAAAGTATTTCTCGTGGAATTTTTTTCACTGAA…
G1_V2_SSR_4425	p2	(AG)6	12	TACATTGTCAATTCATCAAAACTCGATCGAATTTTGCTAAAAATAATATAATAATATTTCAAACAAATTATTATTTTAAATGTACAAAATTATAAAATGTTTACCATAAACTTGATAATCTATTAATTTTAGTTTAATAATTCCTAATAATTATATAATCAATAAAATAAAATAAGAGAAAAAAGAAGAGGAAGAAAAAAGAGAGAGAGAGAAAAATTCATGTTGCCTAATCCTGCTTGCTGCCGACACTCTTCTCCTTCACCTAAACGCCCAGAAAAACAACTCACTGGAAAGTATACTTTCAAACGTGTTGATTTAAGATTTTTGAGTTTGTACTTGAAAGTAACTCCTATTTTGAATTTGCAAAATAAATTATATAGTTTTGAATGTGAAATATGA…
G1_V2_SSR_28478	p3	(TGT)6	18	TTGGAAGACCAAAGTTGAAAACTACACCACGAATAATAATATTAAAAGCTTTCAAGCCTATTTATACTTTTACTATAGTATCGCGAATTCCCAACTAATCATACAGTTGTCAGAAATGGTTTCATCAATTGCTATATATGTGTCCTATCAATTTAATTTCTTCAATTAATTAATTGTATATAATGTGCACGAATCATTCTGTTGTTGTTGTTGTTGTCAGGTTGAATAATTAGATGAGTTGGAACACTTGTCCAGTTGATCTGTAGCTATTGTACTATATATTGGGCTAGTAGTCCTTAGTGAGTTGGAAGTCTTGTGACTTGACGAGGCAGCTGCACTCGTGCATACGCATTTAAATGCTCGATGTTTCCTAAATATATCTGAACCATTTAGGCATGT…
G1_V2_SSR_64911	p2	(TA)6	12	AAATTTAAACATATTTAATAATTAAAATTATATATCATATATGCATGAATAATATTGTATTAATTATATATTAATTATATTAATTATACATTAATTATATATCATAAATTTAATGTCAATTATTAAAAATATTCAAATTTAATAATTTATAAATAGTATTAAAAAATTTTGTCAAAGTTAAAAGAGATTGTTAATGTGTTATATATATATACATATATATATGTATGTATATACGGAGAAAATCCAATAATAACTTCTTAATTTTTATATTTTTTTAATATTTATAAATTGTTATGGTGTATTAATTATATATATTATATTTAATTGTTAAAAATATTTAAGACACACGTCTTATATATATATAAATTAGTATAACAAATTGTGTCAAAAATTAAACAA…
G1_V2_SSR_31939	p2	(TA)9	18	TTCAGAGAAAAGTGTTAGACGGATTACCTTTTATCGAGGAAGAAAAAGCAGAAATCCCCAAAAGTTAGAAACCCTAGAGAGAGAGAGGGGGGCTGATTGTTGGTGATTATCGCCACAGAGCGAGGTGGCGTGAGAATGGAAGGCACATAGCAAAGCTTAGTGAAGGTAATTCGCAAATTAGTTAAAAAATAAATAATTTTATATATATATATATATACGTATATATTTTTTGGTTAGGTCTTGTAGTTGAGTATTTATGTAACAATTAATTAATTGGTTTTCCGAAAATCTTATCTATTTATTCTTCTTATGTTCATTCTATTGGCGTCGTGTTGTGTTTGTATTTTACTTGGAGGAGGAAAATCATCGTAGATAGATAATGAAACTAACTAATAAAAG…
G1_V2_SSR_14793	p2	(TA)10	20	TAAATTTGATCTGTCTCGTATTATAAATTATATATATATATATTTGTTGTGGTTATAATTTAACTTTTTATAATGTTAAGTTATTAATAATGAATAATTAAAAATTTTAAAAGATTTTTAATAAAAGAGTTAAAACAATAAATTATAATTAAAATTTTAAAAAAACCCTATTTTAATAAAACGAGAATTGAACAATATCTATATATATATATATATATANNNNNNNNNNNNNNNNNNNNNNNNNNNNNNNCATAGACAGGGGCAAACAAAAAATTATTAGTCTAGAATTAAAATATAGGTAGGTTTAATTGAGAAAATATTTATAGTAGGGGGATTAAATTATGAAGATCTAAGAACAAAAATCGTATATGATTTTGAATATATAATAAATTAATACTT…
G1_V2_SSR_14205	c	(TAAT)5tattaaactaaaattaggtgactgtgagatgaat(TA)10	74	TCAATATATATGTAGGGAAACTTGATCCTGAATTTAGTCCTTTTCTGCTTGTATTTATGTGTGTATATATCAAAATATACGTACTGGAATCCCATTACAATATATTGTCTTCAAACCTTACCTGCTTTTGATGCTTCATCTTTGTTTTGATGATTCGATGACGTTTAGGGTTTAACTACTTGGAATTTTTTGGTCTTGCTAATTAATTAATTAATTAATTATTAAACTAAAATTAGGTGACTGTGAGATGAATTATATATATATATATATATANNNNNNNNNNNNNNNNNNNNNNNNNNNNNNNNNNNNNNNNNNNNNNNNNNNATTATTAAAATTTTATTACTAGGGTTTTAATTTATTGATTTGATTGATTAGACATATTACTATACCCTCCGAAGA…
G1_V2_SSR_63360	p3	(TAA)7	21	GTTGAATCGATCATCTCATGTCATTATAATTATTATTATTATTGATACAATTATTACTTTTTAGATTTGATTTGATTTTTGCATTGCCACCACTTGGATGAATTGACCACACCTCTCTATTCCTTTTCCTTTCCCCCTTCCTTTTCTGCTTATGCTCCTGCTGATGTATGCTATTTCTGTTTCATGAAAATTAACCCATTAATAATAATAATAATAATAANNNNNNNNNNNNNNNNNNNNNNNNNNNNNNNNNNNNNNNNNNNNNGAAATGGGTAACAATCTTTAATTTGTCATCTATCATAATTATGGTTAGTTTAAATTGAAGGCTCGAGGATAACACATTAGATGTGGATTCTAAACTTTAATTAAAATATTTGATTAATTTAATGTAAAACTTGA…
G1_V2_SSR_4635	p2	(AT)10	20	GTAAGTTTACACATATTTTTATACTATTTTGTAAATCGTTAAATTTATTCACTTTCGACTATTGAGATTAAGTTTAGCATGTGTATTAATTATGTATTAATTACATATATTAAATTTAATTACAATAGTTGGATGTGCTTAAATTTAATAGTCAATAAATAATATAAAAATGTGTAAATGTATATGGATGATCTGCTTAATATATATATATATATATATTTAATTGAAATTTTTAGATGTGATTTTGCAAGAAAGAGAGGTTCCAAGAAAGAGAGGTGATGTTAACGTGTAAGAAAGGATCAATAATGTGAAAACAACATATATGTTGCGTATGTGAAATGCAAATTATGTATAATTGTGTGCATGGGGGACAATGCTGATGAGGAGAGCATGTGTACA…
G1_V2_SSR_33621	p2	(TA)10	20	AATACTCCATCAACCCCTGATTCTTATATTTTTTTCGATTTTACCCTTTAATTCAATTGATTTACAAATGATAAAATCGAAAATATTAAAAATATTAAAGGGTAAAATCAAAACTCAGGGGGGTGATGGGATATCACAGAAAATATAAGGGGTAATGGGGTATTAACTGAAAAAACATAAGGGTAATAGGCATTCTCTTTATATATATATATATATATANNNNNNNNNNNNNNNNNNNNNNNNNNNNNNNTGTTTCGATACAAGAATACATAAGAAGATAAAGTAATTATCTTACCTAAACTCTAAGCAATTAAGAAATTGATTAACTATTAAAGAATACAAATAAAAAAATTACAAAATCAAGAAAGGCAAAGCAAAAGTCGAAATGAGCACATGTAT…
G1_V2_SSR_55814	p2	(AG)11	22	TGTTTGTGTGTGTGTGTGCGTGTGCGTGTGCGTGTGCGTGTGTGTATTTAAACACATATCTATTTAAACAAGTTAAGGCAGAATGGGCGGAGCATGAAGGCTTAAACCAAACTCTTACAAAGTAACTAGATCTTATGCCTAGGCAAGCATAAAGAATTCACGTCAAAAGATAAAGTGAGGCTAAAGTTATGATATTAAAAGAGAGAGAGAGAGAGAGAGAGAAGCATGTAAATAAATAAGTTTAAGGCTATCATATAAGTATTCCGTGTCCATAAAAGCACCTTTGATTTGTAAATAGATGGGTAACAAAGTAATAGATGCTATGAAGATTTATTGATTATGGGAAAGAATAAAAAGGTTAAAGATAAAGTTTAGGATGGTTGATGTGTTTAAGGTACT…
G1_V2_SSR_18662	p2	(TA)6	12	ATAAACTCAATCTTTACTAAAAATAAGCTAACAATCTCCGCTTTAACCATTGTTTCAATTGCAAAATAAAGTATAAAGGAAAAACCTTTGTAGTTGTTGTTGTGTCTGCTCAATTATATCATTTTAACCTTCTTTGATGTGACATATTATTCAATTAAATAATCAAATATAAAAATTAAATAGTATTTTTAATTATATGTATATATATATAAAACAAATTGATACTACATAAGATATATTTATCAAGAGATAAGATACATGGAAATTAAAAAAAAATTATGGTTATTTTCATTTTTGTCTCCCTAATTTATTAATATATATCAAACATGCTATCAGTTTATTAAAAGTTATTACTTCACTACCATATAATAGTAAAATTACTATTTTATCCTTATTTCT…
G1_V2_SSR_5899	p2	(TA)7	14	AGAGAACACAAGATGCAAATACATTGATATCTTTTAGCGATTGATAGATTCTTTATTCTTTTTTTTTTCTCTTTTAATTTTGTCTCTTTAAAAAGCCAGCTGCAGTATAATGAAGCATGCAAATCCAGTGAACTATATATGCGTCATGATAGAGACATTCACACAAAGATGAAAGATTCACCCTTAGCTTAATTGAATTTATATATATATATATNNNNNNNNNNNNNNNNNNNNNNNNNNNNNNNNNNNNNNNNNNNNNNNNNATTATGGGCATGCATAGTACTTCAATCAAGGCTGCAAATTATTCAAAAGCTGTGTTGGAAAATCATAACAGTTAAGTTAGCTATGTTAGATTAAATTTGATCCTTATCTTTTTCAAATATATTTGAACTGAGAAAC…
G1_V2_SSR_45290	p2	(AT)10	20	ATTTTTAAACATTCATCACTGGGTAGTTTGGGTTAGGTAGCACAACAGCCCATCACTTAACTTTTTCTTATTTTGTTGATCCAATAAGCTCAAGATAGAGATAGTGGTAGTAAGTGGAATATTTATAATATTTGTCCATAGATTAATCTTGGCTATTGATAGTGCTCTTGTATAATTAATCATGGCCATTCATTTGTAAATATATATATATATATATATGTAAGTGTTAGTGTAATGAAAGGAAGCCATTCATTCCATTCTCAAAAGAGCAACCCGTGGGTTTCTTTCTTCTCCCATTTTTCACTTGCTTTCTCTTAGCTTTGATTGTATAATTCTTCACCTCTCACGCCAACACACACACACACAAAGTGATCTTAGGTTGTTAAGGCTTAC*TTTAC…
G1_V2_SSR_36734	p2	(AT)10	20	ATTCCAATATTTTCCCACCTGCAACATCACCACACACACACACACACATATATATCTACATGGCTTTTCTTTTCGATTAATTGCAGCAGCACAGTCGTGTAGTAAACACTATTTTTCTTCTTTTCTAATTGATTTTTCTTTCTAATCTGTCTATGCACACGCTTAATTACGCTGATTAATTCTCAACAATGATATATAAATATATATATATATATATATTGTGTGTGTATATAAAACATAAGAGCACATTTTCGACTAGTTTTTAATCACAATGACATGCTAAATATTCTCTATATAAAAAAGCCAGTCAAATAAAAACAACAATAAATACATATAATAATTAATAGAACAAATCTTATCTAATGAGATTGATTCATCAACACATCATACAAATATATT…
G1_V2_SSR_53170	p3	(TAT)16	48	CATACACAGAAGGAACTTCTCATGTCAAACATGCAAAATGCGCTTTTCATAGACATTATTACAGTTACAAAACATAAGCATAAAAACAGGGCATAAACCCACAAGGAATTCCCTATACTAAATATGCAAAATATACTTTTCAAAATGATCTCACCGACGTCATACTGAATATGATGATTAACCTCGTATTTAATCTGACTATTATTATTATTATTATTATTATTATTATTATTATTATTATTATTATTTTAAGAAGTTAGAGATTCCTTATATTACATATGCAAAATGTACTTTTGAGAATGATCTTTCTGTCGTCCTACTGAATGCGAGGAGCATCCTCGTATTAATCTGACTCTTATTATTATTATTATTATTATTTTAAGAAGAAGTCAG
G1_V2_SSR_18035	c	(AT)9nnnnnnnnnnnnnnnnnnnnnnnnnnnnnnnnnnnnnnnnnnncata(AT)10	85	ACTAAATATCGTGATAGAAAAGTTGATAAAACTTTTTTCTTGCTATTTGAAAAACCCCATTTCAACAACTCCAATAGTATATATATATAATATAGCAAAGTGGGCATGAAAACATGCATATATAATCAATTGGTGCAAAATGCATGCGTGCTATTTGTACAAATCAACCACTGAATTAATATTAATGTGTTCAATATACATATATATATATATATATNNNNNNNNNNNNNNNNNNNNNNNNNNNNNNNNNNNNNNNNNNNCATAATATATATATATATATATATGCTCTTATTGATGTGTATTTGTTTTTCATAAGATACGGATTTGGGGTCTAGTGGGTGCTGAGTATGTGCCCAGGAGGATGCCATGAATCTCTTACCACATAATACAATCATTTGA…
G1_V2_SSR_29027	p2	(AT)7	14	AAGACATCACTCGTATTGAAGAAATCAACCTTCTAAAAATGGCTTTATCGTAAGAGGGAATGAAGCAGAAATTACGCGGCATCACTGCAGATGAATGAATTTGACTGACATTGGAGGTTTTTAATTTAATTAAATTAAATCCACAAAAACTGCTTTTGATAATCAATTCTCAACATATATATATAATATATATAATATAATATATATATATATGTTTTGCTTCTACGGTCCCGTTTTATGTGGGCTGGCCAAATCACATTAATTAGAAAATTACGAAAATGACTTTAGCTATATAATAAAATAACACATTTGATTAACATTTTCCATAATGTTTGCTTTGTTTGCGACTGTAGTACACATTTGATAGTCATAGTTTGCTTGCATTTGGGGGCCGGGTTG…
G1_V2_SSR_14417	p3	(GAA)5	15	CGATCAAGTGTTACTAGCATTCATACATATAGAGACGTAAATAAGTACACGCATACATATAATACACGTACACATATATAAGAGAGCTAGACAGAGACTCATATCTGACCGTGATTAACGAAGCTGAATTATAACAGCCGCTGACGAGAGAAGGGCTTAAAACCGTTTGTAAAGTACAGAACAGAGGACGAACTGCGAGGAAGAAGAAGAAGAAGANNNNNNNNNNNNNNNNNNNNNNNNNNNNNNNNNNNNNNNCCATTTTAAAAAAGAAATTGGCCGGGCTTATTATTTAAATTCCTAATCTTTCTATATTTTATTGAAGATAAAATATTCAAATTTCTCATTTTCAAATAATATATATTTTTCCACGTTTATGTTAGATATATTTCTTTTTTTTTA…
G1_V2_SSR_11475	p3	(ATT)9	27	TTCCCTTTATATAATTTTTTAATTGAGCTGAGGTGGAACTTAACTGGCATAATAGTCATTATTTTTCCTCTGTATAAGTTTTGAACTAAAACTATTATCTTTATACTCTTTAATTACCCACCATAAATAGAGGTTGTCCAGTATTTTATATAAATAATCAATGAGAATATAATTTCTCTCTTTTTCTAAAAATTTATTAATTATTATTATTATTATTATTATTATTTTTTAATTTTATGAACCAATTGTGCCTTTAATTCGTGCGTATATTCTTCCCCGTTATCACATAAAACAAGAGAAAGAAGATCATATCGTACGATGAAACCGGAGCACTTCACAATTCAAACACCAAAAAATCACAAATTTCCTTCTTATTATATATCATTTAACGAGAAACAT…
G1_V2_SSR_64457	p2	(AT)9	18	GTATACGCTTGTAATTTGACAATCTCAAATCAAATTTTACTATGCTATTTCTTTTATATCGTAGAGAATGTTTTTAGATAACCAAAAAATGTTAATATCAATTTTGAACAGATTAATATGCCAGCTCCGTTGAGATAGATAATTAATATACCAATTAAATTAAATTTTAAAATCAAATGTGGAAGGAAAGTGTTTTTAGATATATATATATATATATANNNNNNNNNNNNNNNNNNNNNNNNNNNNNNNNNNNNNNNNATTAAACAATTTTGTCCAATATATGGAAACAAGTCCCGGTCGGTTATATATGAAAGCAATTACAAAAGCAAAATTAAGCAAGGGGAGATTCAATTTTAGCTGCTCGCAGTTTCATGTTTATTAATTTCGTTGTCAAAAGTA…
G1_V2_SSR_39680	c	(CTT)6tcttttcttcttccattc(CTT)5tcttttcaacttcatcttcatcttcatcttcttctttctttttcttttttcttttggtctacttgttc(T)13	132	TAATTTTAAAATTAATTAAAATTAAAAATATAATTAATTTATATGTTTAAGGGTAAAATGGTCATTGTAATTTAACAATAAATATAAAAATATTATATTTAATAAAAATAATTATACAATAAAAAACTCTAAAATCCTATTTTTTCTCCTTGCAGCAGCAGCCCTGTTGCATCGTCTCCTTCTTCGTCTTTTTCTTTGGCTTCTTCTTCTTCTTCTTTCTTTTCTTCTTCCATTCCTTCTTCTTCTTCTTTCTTTTCAACTTCATCTTCATCTTCATCTTCTTCTTTCTTTTTCTTTTTTCTTTTGGTCTACTTGTTCTTTTTTTTTTTTTCTCTCTTTTGGGTTCTTATTTGTTTACTAAATTGCTAACACATAATTATTGATTTAGGATAAATTAGG…
G1_V2_SSR_4639	p2	(AT)10	20	ATTTTATTTGATTGTTATTATGATTTTAAAGTAATAGTAATTAAATAGCACTTTATGTTATAATGTTACATTTTTTGGTGCACATATTACATTCTTCAACTAGTTATAATTTTTTTAATAACAAAAATTAAGTTTGAATAATTTTTTAAAAGGAATCCGAGGAGAGGATGAGTACGAATTTTATATCTTATAAACTTAAATATATATATATATATATATAAAAATAATCCTATCTATGAATCTCATAGAAATAAAGAAACATTTTAAAACTTTTGGAAGTCACAGTCTTTGACTTGAAGGCTAAGAGAAGTGAGGCAATCACTTATGATTAACACAAAGTTAGATGAATTAATATTAATTTATTATTAGATAAGAAATTATAATTGAGACTTGAGAGAG…
G1_V2_SSR_24696	p2	(TA)8	16	ATAGATATATGCTTTAGAGGGCTTCTTGTTGTCAAATAAAGATTTCAATACAAGGACATTTGCGTGATGGCTTGGCTTTACTTTAGTGATACCATTATTTGTACAGCATACATTTGGTTTGGGTATAAGTATTCAGCTGTATACCCCACTATAAAAATTTACAAGCTGTCATTCCACTAACAAATACATAAAGAGGATTTATATATATATATATANNNNNNNNNNNNNNNNNNNNNNNNNNNNNNNNNNNNNNNNNNNNNNNTGATGTTAACTACTAAATAAATAATAGAATTGTGATGTAGTTCAAACTTTCATAGTCAGAATAAATATCTTATTTTTATATTTGGAGAGAATCATAATCTTCACTCCTATTAAAATAGAGGGATGAATATAATTGTT…
G1_V2_SSR_54894	p2	(AC)18	36	ATTATCTTTCAATTTCATTTGCTAATAATCAATCGTTGTCATTGAAGTAGTTTAATTAGCTATAGTAATGTGACAATAGAG*AAAAAAAAATCTTGCCATGAAATGACACAATGATCATGTTTAAGAATTAATTGTCTCATGCTTAATTAAGAGTACTCTCCTCCAACAATTAATCATTAAACTTTATAACTAGATTATACACACACACACACACACACACACACACACACACACATATATATGTATGCATGGAGGCAGCCACTTGGAAATTAGAGAGCCTAAAAGTCCAAATCAAGGTAGATTTAGTTGAGTATTTAAAATAGCTTAGAAGCAAATGAATGGAAGGGTAAGGAGTAGAAGATTTAATTTGGATTTGTGGGAACAATTCCAGAGAGGAT…
G1_V2_SSR_32741	c	(TC)7ccc(AT)9	35	TGAGTTTGATGAATTTGCTATGTTCATAATTTGGTGTATTTACATTGTATGTAGGAGGGAAAAGTAGCTTTAATGAAGCAATATTTACAAAAATGGAAGTCAACTTTTAAGACATTATCAAAAACGCGTTAATTAGTCTGATGCACGAGAGTTGATATTCTGATGCAACTAACTAAAAATGGAATTAATAAAATTGATTTCTCTCTCTCTCTCCCCATATATATATATATATATNNNNNNNNNNNNNNNNNNNNNNNNNNNNNNNNNNNNNNNNNGTTTATTCATTCTTTGGCAATCTTTGCTTTGCGTAATTCTGGTTAATTAGATTGTCAACGGTGACATACTTGCTGATGCAAGATGGTATATATGTAAGTAAGGTCTTGTGTTAGGTGATTTCAA…
G1_V2_SSR_23015	p3	(ATA)11	33	GTGGGAGGAGATTTCTCGGAGAGCGGTTTAATCGACGGAAGAGAAAGAAAACTAAATCAGCGACGCGTATGAACGAGACAAGGGAAAATATTTGGATCAAAGGAAAAGTTAATTGGTTACGGTGGGAAAGTATGAACGTGACTATGCATGAATCAGAGAATCAGAAGATTGCGTAATTGAAGTCAGCTTAACATTAAATATAATAATAATAATAATAATAATAATAATAATATTAATATTAATACGAGATTAATTTATTGCCGGAAGTTTGATCCTAACATAATACTTTTTAATATTTTAATTTCTTCCAATATCTAATAATAATAATTAATTAGAGAAAAGTAATTTGTTCCTTTCGTTTGGTCTCCCACCCGCCTTTTTCTTTATTATTATTATTAT…
G1_V2_SSR_15763	p2	(AT)8	16	AATAATTAAATGCCAAGTTAAGGTGAATTAACCCATTACTTAAATCTTAATTAATGCATTAATTGTGAACCATTTTCCATCTCATGGCAAGTTACATGTGATTTCCCAATTATTATTTTTGGATTTTATGTGCACATGGTATTACGTTGTATTCATATTAAATGAATTACTATAAATAATAATAAGATACGATCATAAAATATATATATATATATNNNNNNNNNNNNNNNNNNNNNNNNNNNNNNNNNNNNNNNNNNNNNNNAAAATATAGTTTTCATATAATTAATAGTTTAAATTATTTAAACTTGATGAGATCACATGGAGTCTCTAATTACACGTATTTGATTATTAGAATCTAATTTAAATTAATATTTTAATAATAATTATTAAATTCATTAG…
G1_V2_SSR_15554	p2	(TA)9	18	ATAATAAATAGACTTTATAAAGAAATTTCTACCGGCCAGAGGATTCACACGTGCTGTTTTCAGTATATAATTAAATTAATAATTGATCATTGAGTTCTATAGTATGTGCAGTCAATTCTCACAAAACACATGTAGATAACAAGTCATCAGAAAAATTTAGAGAAGGGTGAAGCACTAAATCATCTTCTAATTTTCAATTTATATATATATATATATANNNNNNNNNNNNNNNNNNNNNNNNNNNNNNNNNNNNNNNNNNNNNNNNNNNNNNAATAATTTTAAAAAAATCAAATGATTTCAAAAATGGCAAAATTAGCCTAATATATTTCTGACGCGACTATGCTTTTAGGTAAACATATAAAAAATCAAATTATAAGGTGTCGTTTTCTAAACCAATTA…
G1_V2_SSR_65005	c	(AAT)8aaaatatatgtatatatggtgaaacggtaaagaggtgcatctaa(AT)6	80	TTCTCATGTTAATGATTTCATGTAACTAATGAATGTTCAATTAGAAAATTTTTAATAAAATGAAATATTCTGATGTAAGGTTTTAATTAAATTATCAGTAAAATTTGCATTGGAAAGAAATTTTTAGTAACTTAAAGTGTGTCAATATATAAATGAAAGATAATTACTGAAACACCTAGGCTATTAGGTGTCAAATGAAAATAATAATAATAATAATAATAATAAAATATATGTATATATGGTGAAACGGTAAAGAGGTGCATCTAAATATATATATATTGATTGTTTGTTTTCAATTTTGTAAAGAGAATGAAAGCAATTAAACAGAACAGAAGCAAAAATTGAATCCGAGGGAAAGAGAAGGAAAGAAAGGAGAGGAAAAAGAAAAGAAAAAGAGAG…
G1_V2_SSR_4930	p3	(ATA)5	15	CATGTATAGAACTTTTGTGGTTGATTGCCCACATATTAAAAATAATAAAAATATATATATATGTTTTAATATTATAACGTAAAAGGAGGTAAGTAGTACAATCTTCATATTTGTTTTTTTTAAGTGATAGTTATTAATACTTTAGGTGAATACCCCTAAATTAATTTCTAATTAACAATGTTGATGAATGCAATTATATATAATAATAATAATACTATACTTGTAAATTGCCAACTTGCAAGTATCGTACTAAAATAAAATACAAAATATTATTGTCGTCTTAATTAATCTTCATAATTAAGCTGTAACTTAATGTAATGTTAGCTTAATTTTGATAAGAAAAATTGACAGAACATATATAAATTTACGGGTATATGTCTCTCTCGGCTGGAAGAGGAA…
G1_V2_SSR_8091	p2	(TA)9	18	TCGGGCCGGGTTTTCAAAAGCACAGCCCAAACCTAGAAAATTGTTTTAGAAGTTGGCTCAGGCTCGGGCCTTGGTTATATGTTGTCCGGACTGGGCTTGGGCCAAACTACATTTCAAATTTGGGGTTTAGAACCTGGATTTAAATTATAAGAAATATTCAAATTTAGGTTGGTTTAAAAAAATGCGACCCAAATCCGTTTATATATATATATATATAGTTAAAATTTGGGGACCTAGTTTTTTACTTGGGCTTGTAATATACACGAGTTTCAAATTAAAAATTTGGACCTAGCCTGGTCTTTTTGGCTTAATTTATTGGCAATGTAAGGTAGCATAGGGCTTGTATGATAGCATGTCACGGGCGTGCCATGCTTTTTGTCACCCTGCTTTTATTCTTTT…
G1_V2_SSR_27053	p2	(TA)9	18	CACATACTGATTGTCCACCTTAATTAGAAAAAGAACAGTTGTAATTGTAGCCTTAATGAGCTGTGAAATTATAACTTAATTAATTTTTTTATGCGAAATATTATATTATTATCTGTTTCGTGTTTTATAATTAAATACAAAGTTTTGGTCAAAATAAGGAGGCCAAACAATACTTTTAATATATGTTGGAGTGTGTCTGTATATATATATATATATATNNNNNNNNNNNNNNNNNNNNNNNNNNNNNNNNNNNNNNNNNNNNNNNNNNNNNNNNNNAATTGCAAAGCTTTCGCATATAATATTCCTTAAAAAAAGTAAAAATATCAGTAAATAGTCCCACACACCTAATAAACTCTAGACCCGAAAATAATACTACATATATAACCTGTTTATATATAA…
G1_V2_SSR_24279	c	(AT)10tagctctttctttca(TAGC)5	55	TTTTGTAACCAGCAGGATATATAACATTGCAAATAATTAAATATTATGGACTACTTCTACTCTTAATTGATATTGAAATTAATTATGGAATTTATTACTAATTAATAAGCCCTCACTAACTTATGCATATATACTCGTTCAAATAACAAATCAAAAAATTTATATATAGTTAAGAATTACTTACTTGCTTATAAATGCAATATATATATATATATATATTAGCTCTTTCTTTCATAGCTAGCTAGCTAGCTAGCTATAGGGAGCCAAATGTTATAAACCTTTTTCTTAATTCAGTATTACATGTATGTCATGATATACATGGTAGCAAGAGAGTTCAATTTTAACTGATTTTCTATATATCCTTATAACCTTAATTCTTTTAATCATGGACTTCCTTCA…
G1_V2_SSR_33796	p3	(TTA)9	27	ATTATTTTATTTATTGAATTGTATATCACTACTTGCGAGAGGAAAAAAATTTATGTATAACGACTCTCTCTCTCTCTTACTTTCCATGTCCTTACGTGTCAAAGATTATAAATTCCAAACAATTTAGTTTATTTATATCACTATTGCACTTTGAAAATAAAGCCATAATCATTAAATCCAGTTCGATCATTAATGCACTTTATTATTATTATTATTATTATTATTATTNNNNNNNNNNNNNNNNNNNNNNNNNNNNNNNNNNNNNNNNNNNNNNNNNNNNNGGGATTGATTAATACACTTTGGAAAACTTTGTGATGATTCTGGACATTTTAATTACATTTAATATATGTAACGGGAGATGAGATTGGTAAGTTAAATAAGCAAGGTGTAATATTATAC…
G1_V2_SSR_23226	c	(AT)8(GT)6atataatcaatcatagcagataaaaatgtaactgctgccattggtgcattcaatttctcattcattcgac(CT)6	110	TTTGGGGAGAAAAATAAAATCATAATGTTCGCCATAGAACATCAAATGGGTTCATAGAATTCAGGCATGCAATAAAAAGAAAAGATTGATTAGTATATTTAGTATTCTCTCAACGAGTAGTGGAGATAGAGCTAGCTAGTGGGATCAGAATTCAGCATTCAGAATGCAGAAATACCTCATTTATTATTCTTTCTAATTAATATATATATATATATGTGTGTGTGTGTATATAATCAATCATAGCAGATAAAAATGTAACTGCTGCCATTGGTGCATTCAATTTCTCATTCATTCGACCTCTCTCTCTCTCATTTGGTTTGCAATTTGGTCACATTACATTTTACATAATTAATATATATAGAATGTGGCCGGCTGCTGATGCTACAGTTTCAATTCTCA…
G1_V2_SSR_7416	p2	(TA)10	20	ATCTGCTTCAGCCATATGCTTTATTTCTCGAGTTCTGGCTAGAGCGAGTTGCTGATGCAAATTGGAAAGCTTTAGGGAGTTTGACAGCAAATAAATTGAGTAAGAGAAACGTAGGGGAAGACTTTTATAAGATTACAAGGAGGTGGGGTTGGAGGTATATATAGCAATTTTCACATTGATGCTTTATATTATATTATATTATATATATATATATATATAAAGCTCATAATTAATTACAAATGTAAAATAATGTAGAATTAAATTAATATTGGAGTAGTACTTTTGTACGAAAATGCATCGAAAATTAACCATATTTTAACCGTGTGATAATACTGAAAGAGGACTAGCTGCCAAACCTCTAGTGTTCCAATTATATATTGTCATTTTCCTTAAAAAATA…
G1_V2_SSR_31818	p2	(AT)9	18	GCAGAAAACTGCTAATTTGGTTATAATTAATTCGCTTGATTAACTATTGTTTCATTTGTCCTTGTTAATTAATGGTAATTTTGTTCAACTTCTCAAACGACACTACTTTAACCTTTTATTAGCATAAAAAACCAAAACATTTCTTTCTCATTTTACAGTTACATTCATGTCGTTCCTTTGTTTATTTAATAAGATTTTAATATATATATATATATATTGTGATTTTATAGTATAAATTTATTAGGACGGTTAATCTAATACTTTAGAGAGTCCTACATTCATGGCATTCATGTATTTACTTAATACATATAACTATTTACTTATTTAATAGTGACTTTTTTCTTGCTTGGATTTTTTACAAATTTTGTAGAATCCTAAAAGGGACTTAATTTTAAATAA…
G1_V2_SSR_19633	p3	(ATT)12	36	CAAAATATGATATGCTATGATTTGATTTGCATGTATCTCCGTAACACCTGAATAATATGATTCTCATGTGTTTGTAGTCCATTTCTATCTTAATATTCAGTTCAAATAGATTCCGGTGTATATTGTGATTTAGAGATACGGACCAAAATATCAGGTAATTTATTCAAAATATTTATTTAGGAATTTTAAGATTACATTCATTATTATTATTATTATTATTATTATTATTATTATTANNNNNNNNNNNNNNNNNNNNNNNNNNNNNNNNNNNNNNNNNNNNNNNNNNCTTAGATCTTAGCATATCACCAAATAATTTCAGTCTTACCGAAAGCAAGCGTACCACCAAATAATTTGAGTCTTACCGGAAGCATATTTGTTTTTTCTGATCCTTTGTCTTAA…
G1_V2_SSR_26548	p2	(TA)6	12	AAAATTAAAATAAAATTGAAAATGAATACAGAAAAGCAATATCACAAAACATTTTAGAATAAATCCGAGATGGTTTGTGTATTTAATTAATAACATTGTGAAATTAATATTTATTATTTCTATTAATTAAAAATCACAAAATTTATTTTTTCGTATAAAATTAACACCAATACACATGAAAACATCTTCTTTTGATGACTATATATATATANNNNNNNNNNNNNNNNNNNNNNNNNNNNNNNNNNNNNNNNNNNNNNNNNNNNNNNTTTTAAGGTTTGAAAATTATTTATTCTTATTGATGCAAGTATACTTACAATAATTTAATTCACCTTCTAATTCACTTACAATAAAATATTTTCACATTAAAATTAGGATCAAAGGTATTCTAGTATATTCTAG…
G1_V2_SSR_21627	p4	(TGAT)6	24	ATCAAACAAGACAAAAGGAAGCAGGTCAGGAGGTGGGACCCGAATCTAACAGAATTATTTATTTATTTATTTATCCCAAATAATGAGCCGTTAGTCGGGCCCCACCTCGTGGCTTCGCCTTCGCAAGTTTTTTCCTCCCTTCCCTTCTTTTCTCTTCTGTCACAGCACAGATTTGAAGATCTTGATTGATTTGATTGACTGATTGATTGATTGATTGATTGATTNNNNNNNNNNNNNNNNNNNNNNNNNNNNNNNNNNNNNNNNNNNNNNNNTGCAATGTACTGGCACTAAATGCTTTTGCTCTACGATTATTATTCTCACGTACTTTTTCTTGTTACTCTTATTTCTAAATAATCCCTTCTCTTTTTCTTATATTTCTCACTACCCCCACCCATTGAT…
G1_V2_SSR_16731	c	(ACA)5(ATA)5attaataa(TAT)5(TGT)6	71	TTGCCTTTCTCAAATTTAAGAAGTATGCTGACTTTCTCTCAAAACTCAAGAGGTAAAGTATAGTATTCTATTCAAAATTAAAAAAATTTAAAATCTACTAATACTAGTGATAACCTATTTTAAGTAGATTACTGAAGTTAAATGGGTAATATTTAAATCATTAGAACTAAAATATACTTTTGACAATACTTTTTCCTTGACAACAACAACAACAATAATAATAATAATAATTAATAATATTATTATTATTATTGTTGTTGTTGTTGTTGTTATTTTTATTGTTATTGTTATTATTATTATTTTCTATATATTTCTTAAAGTTAAATTTTAAAGTCCAAATCAAAGTCAAATTTATTGAAAGCATAAGGTCTAGTTATATATATAGCAGTTAAGATGTCA…
G1_V2_SSR_45088	p2	(AT)8	16	ACGATGAAGGGAAATTTTTGAGTTGGGATGGCTTGCAACTGTTCGATTTTGGACAGCTGATAAACAGAAG*GAAAAAAAT*CACAGAAAAATATATTTAAAAGGATTATTTAATATAATATAACCTAATAGAATTACAAAGAAAGTCTATTTAATTAATTAATTCAAAAATTATAAGAATAGCATTAAGTAAGT*CAT*ATATATATATATATATGGGACAGATCAGTAGTCCCTATTTTTTA*TGC*AAAATCTTACATCAATTATATACCGTTAGATATGCGCACATTTAACGGTTAAGATTTCATCTTATCATGTAATTAATGCACAATTAATACATTTATAATTAATGCATATGTCAAATATAA*TTTTAACCATTAGATGTATTTATATATAAT…
G1_V2_SSR_11771	p3	(AAT)8	24	TTAGGTTTAGGTTGGTGATGCTTCCCTTTAATTACACTTAAATTGATATTGGTGATGGATTTATGTATATATAAAATTTAAGCAAAGGAAAGCAACATGTATATATGAATGTGCCCATTCGAAAAAGACAAAGAAAGTTACTAATTTAATTTGGGATAAAATCAAGTTTAAGATTGTGATATATGATCATTAGCAAAAAAATAATAATAATAATAATAATAATTAATGAAAAGAAAATAAAGATATGTACATTAGAGTTGAGAATTTAGTTGGGTTGTGAGTCAATATTAGTTGATTTTGCCATTTGCATACAAACAAATATCATTATGCACCTCCATTAATTATACAAGCTGGGTGAGAAAATATTCGGTTTATGTGGATGATAGCTAGCTTCAATCC…
G1_V2_SSR_7628	p2	(AT)9	18	CGATCTCTTAAATATTTCTCTCTATTATTATTATTATTATTATGAATGTATGTATGTTTGAGATGCATTATTATATGTAGCATCAAGTGACTTCTCTAATGTCTGAGCTGTTTGTGTTGCTTTCATTTTAGAACATTGATGTCATCGATTGTGACTTCCAAGTGGATGATATGTACCTCTTGATGACTGATATGTGTGCATATATATATATATATATNNNNNNNNNNNNNNNNNNNNNNNNNNNNNNNNNNNNNNNNNNNNNNNNNNNNNNNNNTATTTGAAGGAAGTACTCGCCCCGGCCGATCTCTCTCTTCTCTCTTCTCTGAGATCATGAATCTTTCTAGATACTTCAATTAATTTGTTTGTTTTCATATAAATATTTATTATTAATTAATTATG…
G1_V2_SSR_63619	p2	(AT)9	18	AAATTTTGGAAACTATAAATCGATTTAATTTAGAAGGTTATTAAGTTTAATTAAAAATTAAGAAAAACAACTGTAGAATGATATCCAAAACAAACCCATAGCATAATTAAATTGATCAATTAATGACTATATATTGATTAATCAAAGTATAAGATTACTCAATGTAGTAAAAAATATAATACAACCTACTTCAATATACATATATATATATATATATNNNNNNNNNNNNNNNNNNNNNNNNNNNNNNNNNNNNNNNNNNNTTTTTACATAATTTTTTATATCAAATGTAGATCTTAAATTTAAACACATCTATAAATTGCATATAACATATGCATTAATTATGAATGTATTAATTATACTTTAATTATGTGATCAGATATAATTTTAATTGTTAAATGT…
G1_V2_SSR_7042	c	(AT)6gatcaaattaattttccagatgatcaatcgatcactgaatctaacaccgatgtgatctgtggtttcagcagatgttgtaatctgtgctttc(T)10	113	CATTATATTATTCCACTGCATTAATTGTTGGTTATTCATAAACAAAATTTCTCCCAATTTTTATTTTTTTATTTAATTTATTTCTGGAAGGGAAAGAGGAAAGCTCTTAGTTTAGTATATTAAGGAGGAAGAAAGGAATGAATGAAGAGGAGCAGACTGCAGAGTTTCACTTAAAATGCTTGACTATGTATATATATAAATATATATATATGATCAAATTAATTTTCCAGATGATCAATCGATCACTGAATCTAACACCGATGTGATCTGTGGTTTCAGCAGATGTTGTAATCTGTGCTTTCTTTTTTTTTTGGGGATTTTAACTGATGGAGCAATGATATTTTTGCAGCTCTCTTGCCTGGAACTTTTTTTTTGGTAGTTTTCTTCCCGGAAAATTTT…
G1_V2_SSR_3842	p2	(TA)8	16	ATCATATATGCAATTGCCTGCTGCCCCCTTTTTGGTCCTTTGCCAATCATGCTTTGTATATATAATATAAATATAAATATAATACAGCTCCATTATTCATTTTTGTAGCAAGTGTATATACATGGGAGAAAAGAACACATTCATCTTTAAAATTTGATTAAATATATATTTTATATAATTTTATTGTCTGAAAAGTGTTTATATATATATATATANNNNNNNNNNNNNNNNNNNNNNNNNNNNNNNNNNNNNNNNNNTTTTAAAAAAATAAAGATAATTTAATATATTTAAATGTTAACAGGATTACAATTAAAAAGGTATATTATAACGTTTCTAACAAAAGAAAAAAGAATAAACTATCCAAATTAAGTTCTTCGTGAGTATCTTTCAAACCAGTGA…
G1_V2_SSR_43152	p3	(TAA)5	15	AGGCAAGATTATCAAAATTAGCTAAATTTAAAAAATTAAATGTTTAATAATAATAATAAAAATAATACGCTTTGAAGGGTAGCCGAAATGGTTACTACCGCACTTAGTTTCTCTTTCACCTAGTTTCAAAATATCACCTTCAGGGCAGTTAAAGAGATTTAAAATGATTTGTATATTACTCATCCCCTTTACTTTTTTTTAATAATAATAATAAAAAATACAAATATAAATGAAAAACAATATTTATTGGTTGTATTTCTCCCTACATAGGGTGGCGGCAAAATGAATAATTGAGAGTTAAAATAATGAGTTTAAAATATAAATACTATAATAGAAATTTAAAGAAAAAAAGTTGTGAGCCTTTTTGACTCTGCCACTATCTCTGAGAACTTTAGGCAT…
G1_V2_SSR_19218	p2	(AT)10	20	CACGTAAGAAACAATTACTACTTTGAACCATCTATAATATGTTAGTCCTTCTAGTTTTATGCTCTTGGAAATGCCAAGTAGATTAAAGCTTATACGATAGTATCACAAGTTGCTTAAACACAAACAAATAAATTATGACATTGTATAAATAAATTAAATATATTGCTTTCATGATATATAGAAAAAAAATTATAATAGAATATATATATATATATATATCAAACTATGATTGAAACTAATTTGATAATATAATATTATATATATTTTTTATTTATTCAAAATATAGATTTTCTTTAATAAAATGAGACCAACTTCAATTTAGTATATATAATTCTTTCAAATAATTTTTATTCTTATAATTTAATTACAAATAATAAATCAGAATAATGTTTTATTTCA…
G1_V2_SSR_2291	p2	(AT)9	18	CGTTTGTTCCCACAAAGACAAAGCTAAAGCCCATTGATTGCATTGTTACATTCTTAAATACAAAACCCAATCACTTTCATTTTTTATTATGGAAGAATTATGGCTCAATCGAACTCAAAATTAAGAATTAAATTTATAGAAAAACTCACCTTGTTAGTTCCACTGCTTTTTCATTTCTTTTAGAAAATAGTAATACATAATATATATATATATATATTTATTTATTTAACAGATATTCTATCTTTTTGGACTGACAAAAAAAGTAAATGTGATTTCATTAAAAATATTTTTTCTTTAATTGAAGAAGATAAAATTAGTTTGAAAGGTCGAAGATAGATATCATACATCTTTCTTATAACTATACTAGAATCCTAAAATCTTATATTTATATAATTTGTC…
G1_V2_SSR_23649	c	(TAA)6caagc(TA)6	35	ATAATAGCAACAATAATAATTAATTCAAAATAAAAAAAAAGGGTGTGCGTAATGCACACTACGGCACACAATAAGACGGAACAGTTAATCCCAACTCAACAAGCTATTCTTAGGCAGTTGGCAACTTGGCAGAGAAGCCATACCATATTCCTTGTTTATTATTTTATTATTTTATTTTATATAAAATTAATATTAATCGTAATAATAATAATAATAACAAGCTATATATATATATGTATATTTTAGTTTTTTTGAAAAATATTGAGCCTACTAAATATATACATAACTCGTAAAATAACCAACCACAAAAATAATAAACAACAACAAAACTTATACAAACACAACAACAACAACATCAACAACAATAATCTCAGCGAACGTTTCTCTTTAAATCAAACA…
G1_V2_SSR_38006	c	(A)13gnnnnnnnnnnnnnnnnnnnnnnnnnnnnnnnnnnnnnnnn(GA)6	66	GACGTTTGATGGGTGTTTGGGATGATGATGAAGAGGACTTGTCCCAGTTTATCTGTCACTTCTATGACTTATTGTTTCGGGAAGGTGCAAGAGTAGATGTTGCTTTAGAAAAAGCTCTTGCCTTGCATCGGAAACTGAGATATAGCTGTCATCTTCCCAGTATACAGTAGATTTTTTGATAATTCTCATACAAAACATTAAAAAAAAAAAAAGNNNNNNNNNNNNNNNNNNNNNNNNNNNNNNNNNNNNNNNNGAGAGAGAGAGAGGAGATAATATTGTAGATGAGTGTGAATACAAAAATAAGAGGGACATCCACTTTTTGAGGCTTACAGAAAATTTGTTGTCTATTATTGATTACATGAACTTGAGGATATTATTTCACATTTTTATAATTACAGG…
G1_V2_SSR_26005	p3	(ATT)8	24	CCCATCAAACTATTAATCACTACTTTCTTCCAATTGATCAGCTACCATTACGATACCAGACATTTACTTATGTGGTCCTTATTACTCATCTTTCCCACAACCTCCCTGCCGTATTAATTTACAAAATAATTGTATATTAATTTCTTCCAAACGGCGATCGAGTTTCATATAATTGAATTAATTTGTTATGTCTCGTATCATTATTATTATTATTATTATTATTANNNNNNNNNNNNNNNNNNNNNNNNNNNNNNNNNNNNTTTAACATATATATTGAACTATACACTGTATTAAAGTGCACTGAATGCAAGTTGACTCCAAACAATTTTAGATCAAAGAGATTCATTTGTGGACAACAAAATTAAACATCTACACTCAAAAAAGATCACTTAATATATA…
G1_V2_SSR_29745	p2	(AC)7	14	TATATATATATTATATAGTATGGAATTACGCAAGCTTTTCATATGCCTATTATCGGAAATTTCACTGTGATTACATTTGGTGAAAATCTAAACCACTTTTAATAGATCACATCATTTTTATAATAATTCAATAAAATTTTATAATCATATATTTATTTCATTTACAATTTCTTCCAAATTGAAGAAGATTTACACTTTTACACACACACACACANNNNNNNNNNNNNNNNNNNNNNNNNNNNNNNNNNNNNNNNNNNNNNNNNNNNNNNNNNNNNNACAGAGGACGGGCCTTAATGTTTAAATAGATTATACAGAGCCCATTCTTATTTGGAAGTTCGAGTCGTGTTAAAGAAATTACAATTAGTAGGAAGAAGTATTGTACCACCGCCCCGTTGTGCT…
G1_V2_SSR_64755	p2	(TA)7	14	CATTTACTATTTGAAAAATGATACGTTATCTAATATTATGCAACTAGAAAAGAAAAAGAATGAGCAAAAATTGATCACCACATAGGTAAAATTAGATTATTAAAATAATTGAAATAATTTAAAAACATCAAAAATCTTTGTCCTTTTACCCTGCGGTAAAGTATATCCATATCTTTTAAAAAATCATATATTTATTTGTTATATATATATATANNNNNNNNNNNNNNNNNNNNNNNNNNNNNNNNNTAAATTTTGTAATCATTTTTATAATTTTACAAATATTGTGTTTTTCATATAACTTTCTTATTGTAATTCAATTTTCTATATCAGGATTACAATTAAAATATTAATTTACAATTCTTATGTTATATTTATATTCTTTTTGTTCCATATATAATT…
G1_V2_SSR_28861	p2	(AT)8	16	ATATGCAGCGGCAACCAACTTGCGAAAACGTTGCTGTTAAAAATAGATAAATAGACAAGCAATAAGAAAAAGACACTAATTGGTTTACCTTCCTCCACTCGATTTCAAAATACTTTGTTGAAGCAGGTAAAGGAAATTTTAATAAAAATAATTGGGTTTGAAAATTCTCCTTTATCTTTTCTTAAAAACAAAAGACAAAATATATATATATATATNNNNNNNNNNNNNNNNNNNNNNNNNNNNNNNNNNNNNNNNNNNNNNNNNNNNNNNNNTGCAAATAAACATAAAGTCATTTTAACAAATTTATTAAAGAAAAAGTCTTCTCATAAAATTAATCTTTCTTCATGTTAGTAGTTTCTTTAGAGAAAAAGAATGTTTTAAATTTATAATGTACATAAA…
G1_V2_SSR_37709	p2	(AT)7	14	CACCAACTTTGAACTTTAAAATTACACTGAAGTCTAATATTTGAAATTTCTTTTCTAATGTTTATATGACTATTAATATTGTAAAAAATATTTGATATTTAAAACAGATTCACATCTATTTGAAACTTTTTAGATTATTTTTACACATAAAAAAAATATATTAGATCTTATACTTTCAGATCTGTGTGTATATATACAAATATATATATATATNNNNNNNNNNNNNNNNNNNNNNNNNNNNNNNNNNNNNNNNNTGTTTTTATAGTATTTCCTTTCTTAGATATTTTAAAGTTACCATTAACTGACTCAACGGTTAAATTAGAAGAGATTAAAATTATAAATTATTAATCAGTTCACTTAAGATTATATTTATGTAATTCACAAAATTTATTTTTACCT…
G1_V2_SSR_25331	c	(AAT)5(A)10	25	TAAAGGCGACTGCTTGATAACATTATTTGATTTCATATCATAACACTTTTAGTTTTTCAATTTTAATTTTTTGGCTTTGTATGTTTGTATTGAATGATTGAATTATTCTAATAACATTAATTTTTAATCATTAGTGATAGAAATTATTCATCATAAACATAAATATAAAAATAAATATTGGACTGAATTAATTATATAAAATAATAATAATAATAAAAAAAAAAGAATCATTGGAATGCCAAAATTAGAAAAAATGAAAATTCAAGTTAAATAAATTAGGATTCACAGTTTTAGACAGGTGAAGGCGTGTAGAGAAGGCTTCGAGGTAATTTCATCACGTAGCTAGAATAGAATATATGCATATGATAGCTTGGCCGCTAGTTTCTTTTGTTGTTATTA…
G1_V2_SSR_33046	p2	(AT)8	16	GGATCCGCTCAACACTTCTAATACATATTTATTCATTATTTTTTTTTGAAATTGCAAATATTCAAATCCAAAATTAATATCCTTGATGATTGATTTAGTACTTTTTTAGTATATATGTAAATAAAAAATTAATAGAAGCATATTAAATAAATAAAAATCAGTTATTTGATTTTTTATTAAATAGGATATTGTAATGTAAATATATATATATATATANNNNNNNNNNNNNNNNNNNNNNNNNNNNNNNNATTATTAAATCTAAATTAAATTTATAAAATAAAAATTCAAGGTTTTGCGTAACATTAAGAATTCAAGGTATGGTGTAGTTGTGGAGACTGGACAGAGTAAAGAGGGTTCAGTATTTAGAGATATATATATACACACACACACACACAAAAA…
G1_V2_SSR_28234	c	(TAA)5tactccgcgtttgcttataaattataatacattacggagccattgatattgagtaatacttgatctaattgataa(T)13	103	ACATATTCAAAATAAGAAGACCTGATTAAAATTATGGATGTATTACAAAACGTAAGCCGTTGAAAACAACCGATTCAAACTACATATATAACATGTTTATTTCTTCAAAATAAGAAATTATATGTGTATGTACTACGCACTTGTATAGCGACAATCACTCAAAAGTCAAAGATGCCGGCTCTACAAATAAATACAAAATTAATAATAATAATAATACTCCGCGTTTGCTTATAAATTATAATACATTACGGAGCCATTGATATTGAGTAATACTTGATCTAATTGATAATTTTTTTTTTTTTGTTTTGAAAGATACGAGAATTTTCGACTTTGATTTCTTGTATCACATTCGTATAAAAAAATTTAGTAATATTTTATATTTTAAAATATTATAAGATT…
G1_V2_SSR_3007	c	(CA)9(TA)9	36	GATCGGGTGATTTGCCTTGTATTGGTGCCACAAAGTATTCATATACAATCGGAGCAATTGCCGGTTGGAATTGCTGGGATTCTACTTCTATCCACACTTTTACCAGCGCAGATTCTTTGAGATCTTGGTGCCTAATGAGATCGCAGCCTGTTTCTTTGAATTTTTCAGCCACATATGCTGTGATTGCTCTTGATTCTGGCACACACACACACACACATATATATATATATATATAATAATTGAACAATAAAAAACACACTTAAGTTTTCTGTCACTACTTGAAAACAATGATGAAAACCATCGACTTACTGAAAATAGCAAGAAATTGTATTAGCTAGCAATCTAGCTTACCAAATAAAGTGAGATCACCATCTTCTAAAACAGGAATCTGACCAAATG…
G1_V2_SSR_8347	p2	(AT)9	18	AGAAAAAGTAATTTTGATCGTACTGAGCATTATTGGCATCTATGTTGGGTTCACGCCACTCAAGTCAATCAATCCCTGTACAAACTATGCTGGTTGTCTGCCTTTTGGAATCTTTACTTTCCCCATGCTTGGTCTAAAAGCACCTTTTGCATCTTTTTATTATAATCTTGTGCATAGCACTTCTTAAAGCGAAAATATCATATATATATATATATATNNNNNNNNNNNNNNNNNNNNNNNNNNNNNNNNNNNNNNNNNNNNNNNNNNNNNNNACCGAATATTATTCGTTTTCGTCCCTAATAATTATAGCAATACTGTATCGCTGTTCACATCCACACTCATATTTGTGGATATGAGTTCTCTACGTCTAAACCTCAAATGAAATGCCTCAATTGAGTA…
G1_V2_SSR_45173	p2	(AT)8	16	ATTTTTAAAAATAGTTTGAGGATATAATCTAAGATAAAAAAGTAATAATACAAAATTAATAAAAAAAATTATTACTATTATTATTTAACCAGATATTTTATCTCATTTTATCCCATAAACTCCAAACTTTTATTCTTTTTAACTTTTTATGTACTTAAATGACGTTGGAATTAATTAATGTTAGAATCAGATATTAGAAATATATATATATATATNNNNNNNNNNNNNNNNNNNNNNNNNNNNNNNNNNNNNNNNNNNNNNNNNNNNNNNNNNATAGAGACAGTGAGGACTCTAGATATGTGCTAGTCTACATCTAATGGAGAAATTTAAATCTAATTTAAACGAAATTTGTCCAGATTTAAAGAAATCTACTTCAAATATCACCTGAATCGAATCCCT…
G1_V2_SSR_34768	p2	(TA)8	16	TATCTATTCAAAGTAATTATATAATTTTTATCTAAAAATATTTGTAAACTATTAAACAATTAATAGATTTTTATTTTTTATTAAAATTCTAAATATATTTGCTTCAAAAAAATTTTATTTATAAAATTATTCTAAGCATATCATTTCATTAATAACAAATGGATTAATTTTTATATTTTACTATAATTTTTGTTTATACTATATATATATATATATNNNNNNNNNNNNNNNNNNNNNNNNNNNNNNNNNNNNNNNNNCCTGGAGTTTGGGGATGGACAAATTAATACCACTAATGTTTGAAGAAATAAGTTGTAATTTTTGTTCCTAGATTTAGTACTAATAATATATTTACCTGTTTATTTGTAATTTTACGCATTAAAATACTTAAAATAAAATAAT…
G1_V2_SSR_28444	c	(TGCA)5tggctattatgataacaaaggggtgaattagcatcattatactcttttaattc(T)12	85	GAATGAAATCTTGATTACAAGGACAACGAACAAAAATCCAGCCTACCCAAAAACAAAAAATAAAAAACAAACAAGAAAATTAATAATAATAATAATAACAATAATGAAGAAATTAAGAATAACAATTATTTATAATAAGAATAATTAATGGTACGGAAATGACAAGGATTGGATTGCAACAATTAATTAACGGGCAACCTGCATGCATGCATGCATGCATGGCTATTATGATAACAAAGGGGTGAATTAGCATCATTATACTCTTTTAATTCTTTTTTTTTTTTAAATAAAAATAAAAATAAATAAGAATTAATGCAGAAAAGGGATGCTTCGGTGATTCATTTAATAATTTGATTCATCCAACAAGCCATCATTAACCTAACTTGTTTTTGGCTGGCT…
G1_V2_SSR_3217	p2	(AT)7	14	TGGATTTCCTGATCATCCACATAGAGGTTTGATTAATTTTGGCCATTTGCTTAGACCTGTTATTTTCCAGAGAAAGTTTTCTTTTCCAGATGACAAATGGGATAATTCTGATCTTTCTATTTTCCGTTAACAGGATTCGAGACAGTGACATATATGTTGCAGGTATAGCAATTGATCAACCACTAATATACATACATACATATATATATATATNNNNNNNNNNNNNNNNNNNNNNNNNNNNNNNNNNNNNNNNNNNNNNNNNNNNNTACAACTATTTATTACAATTTCTTAATCAAGTAAGAAGTAATAAATTATTCAGTCAATTAGGTAATTAGACATGATTGTAAGACTAAAATATAGCACATTGTTAACATGGTAATCTTTGTGGCCGGCAACACT…
G1_V2_SSR_6201	p2	(AT)9	18	NNNNNNNATTAAAAAGTTAGTAAGAAAAATTCTAAACAAGGAATTGAAAGTTTTGAAACTAATTAAAAGTTAGTTTCGTGGAATATAAATTGCGAAGGTGCGTGCGCAGCCGAAATTTAATATTTACTAATTAATTATATCAAGCTCTCTAGTTTTTGAGTATTCATATCAATTAAAACTTTGGCACGTATACATATACATATATATATATATATATNNNNNNNNNNNNNNNNNNNNNNNNNNNNNNNNNNNNNNNNNNNCTTCATTAATTTAATTTCATATTGTTAGACGACTTTGATTTGAATGTTTATGTTCAAATCATACCTGGTTAATTGCTAGCTAATGGTATCAAAATTGAGGTCTTGATCAGTTTAAATTAGGCACACGTGAACAAAATAT…
G1_V2_SSR_31070	p2	(TA)7	14	ATATACAAGCTCTATTCCATTTAGCTCCATTCCATTTAGCTCCACAAGGACTATTTTTGATCCTCTTCCTTGTGAATTAGATGCTCCATCAATATAAAGTCGACAAGGTAGGATTGTTGGTTCAGGGCCAGATATATTCTCGGAGGTTTATACTGATGAGGCATCAGGCTTTAGTGACCTCAGGATATTCCTTCCAAACTATATATATATATANNNNNNNNNNNNNNNNNNNNNNNNNNNNNNNNNNNNNNNNNNNNNNNNNNNNNNNTTTTCATTCAAAGTTCAATATCATCAACTATATGCCCAATACGTTATTATTTGCTTTATTACAAGGCTCAGTTGTATACTAGTCAACTAGCCCTCTCTTCACTATTCACTTACTTTTGTAGGCTACTGCTT…
G1_V2_SSR_4899	c	(AT)6aaggaccttaaaaaaatagagaaagaaattaagatgagactaatat(TA)10	78	AGTACTATAATTATTATTAGTTTACCAACTCTGTAAGTGGGGGTGTGTATACATATATAATATATAATTTTTTAATGACTAAATTAGCAGTTATATATAGTCTAATAAACATATATATTTATACTTTCATGTTGGCTCTTATATATATGAATAATGCATTCCCGTTATTAAATTAGTCAGACGATCGACAGTGATACGAATATATATATATAAGGACCTTAAAAAAATAGAGAAAGAAATTAAGATGAGACTAATATTATATATATATATATATATANNNNNNNNNNNNNNNNNNNNNNNNNNNNNNNNNNNNNNNNNNNNNNNNNNNNNGTTTAGTGCATGATCGCTGGCTACCAAATTTAGCCATTCAAAACCTGAATTAATTAAACAAAATCATAA…
G1_V2_SSR_16279	c	(A)11tccagactttgtatgacattagataagcgtagatttgtcccattcgaatttgaaataatgtatac(AT)7	90	ATTAATAGATGGTCACCATAACAATTAGTTGTCAATGAACTAACTCATAAGCAGAATGCTTCACATTCATTAATATCCACAATTAATTATATATAATTAATTAATTCTCCATATATACACCCCAACGATGGTCAGATTTTCGACTCTTTTTCTATTTGGTTCTTCTATTGAAACTTCCCCATTACTTACGAAGTGGAAGAAAAAAAAAAATCCAGACTTTGTATGACATTAGATAAGCGTAGATTTGTCCCATTCGAATTTGAAATAATGTATACATATATATATATATNNNNNNNNNNNNNNNNNNNNNNNNNNNNNNNNNNNNNNNNNNNNNNNNNNNNNNNNNNCAAACTTTGCATGTACAAGAGAAAAACCAGTGCATTAATACCATCCTTTTTT…
G1_V2_SSR_47193	p2	(AT)9	18	GTAATTCTAAAACAATCTAATTCGGATTTTGTAAGCTTTAATTTCTTTACAGCTTATATATGTAATATATCTTGGGGTTGATATGGTAATCTGCAACCTCCATTCATAATGCAAGCTTTTTCGCTGCGTCAATACCCTATCATATAGGCAACTTTTTAAGCACCAATTACCCTCACTGTAAATGTTCTAGTTGATATACATATATATATATATATATNNNNNNNNNNNNNNNNNNNNNNNNNNNNNNNNNNNNNNNNNNNNATATATGTTTGTTTCCTACACCTACATATATGTAATATGAACTGTGATTGTTTGTACTCTTTGTGCAGGAAAATAGAAAATGACAGCAGGTTTTTCAGAACTGTGACCACACCTTTTGGTTTTCCACAATTGAAAAAT…
G1_V2_SSR_36788	p2	(TA)6	12	GAGACCCTGCAACATAATTTTTGAGTCATTTCCCCTCCAAACACAACCACTGTACCATACAACCTTTGGGTTGTGGGCCTATACCATAAAAAGAGCAGGCCAGTTATCAAATCGCTATATTTGAACACTATATCTTTATATAAGAGTTTGTGAGCACAATATCAACACATTATGAGACTAATTTGTGTGTGTGTATATGTATATATATATATTATGTTATAATGTATATTATTTATTAAGATAAATACTTAAACTATTCTCTTGCAAATTGGTTAACATTATGATACAAGAATTTTTGACATGTCTAGAAAATAAAAAATTATATAATAACTATATTAAATAGAGGATGCACAACTTATTGGTAAAATTTGTTACTCCAGTAATTCATTCATAAAGTTT…
G1_V2_SSR_24787	p2	(TA)10	20	AGGTTTAAATAGATCATGGAACCTTAAAACACAGCGGGGAAAGCGAGACATCTATAATTAATTCAACTGCTGTTTGTTAATTAATTTTGTTGCATATATGTCTGCTGCCACTGGTCCGGGAAAGCAAAAGCGAGCGAGCTAGCTAGTTCATGAATTATTTTCTTGGGAAAATTATAATGTTGTAACTTTCTAGGGCTACTATATATATATATATATATATNNNNNNNNNNNNNNNNNNNNNNNNNNNNNNNNNNNNNNNNNNNNNNNNNGAAATTAACTGAAGTGCAATTAATTCCAGTCCTCCCATTCTCATTTTGTCTTTTTCTATGTTTGATTATGTTTTATATATAACAAAGAAGGTTTTAGATTTTTAGTGATATCTTATATAAGATGTTTTAG…
G1_V2_SSR_8221	c	(TA)8tnnnnnnnnnnnnnnnnnnnnnnnnnnnnnnnnnnnnnnnnnnnnnnnnnnnnnagcattagacaagtaaattatgaaca(T)10	106	TAAAATAATAAACATATTTTAGACAAATTTAATTCAAAAAACTCTATAATCAAGACCAACAACTTTAGATTTTGAATTTTTAAAAATCCTCTGTAATGCCAACCAAACAATACTAAAAAAAAATTAAAAGGATATTTGATATTATGAAAACTCTTTTAATTAATATAAAATTCAAACCAATCATACGCTAATAAGTTGTTATATATATATATATATNNNNNNNNNNNNNNNNNNNNNNNNNNNNNNNNNNNNNNNNNNNNNNNNNNNNNAGCATTAGACAAGTAAATTATGAACATTTTTTTTTTAAATTTAATCCTTCAATTTTGATAGTTGAGACTGATGAGAGGCTGTCAAACGAACGACTATTAGGTAGCCAGAAGAACACCTTTACGTAAATAA…
G1_V2_SSR_16361	p2	(TA)9	18	TTGTTTTAAAAAGACTGAAAAACAGTTTGCTTACTAAATTGTTCCCTATTATAATTTTGTGATTCATATAATTCTGAAAGTATGTGTAAGGATATCATTTGATTGTTTTCACGTTATTTAAAGATTTGATTCAAGACTTGTGGTGTATTTAGAATTGAGACTTTTCATTGTTATTAGATTTTAAATGTTTATTAACGTGTATATATATATATATATATNNNNNNNNNNNNNNNNNNNNNNNNNNNNNNNNNNNNNNNTGAGCATTTAAAAAATATTTTTGACATTCTGATTTTTGTAGTTATGAATTTCTATGAAGGATAATTATTAAGTATTTGTGCTTATATATTATGTAAGTTTTATTAGTTAAGTAAAAATCAGGACCCATCGAGATATAAGGCA…
G1_V2_SSR_9524	p2	(TA)9	18	TATAGTTTTTGCACCACATGCAGCAAGACATTATGTTTTATATATATATATATAGCAATTAGATGTCAAGTGTTTGACAAAAGTTTTGGATGGGTGGAATACATTATTTGCAGCTTGTGGGTACACCAACAAATAATCATGTTCTTATATCTTAGTATAATATATATTTAATTAATCAATATTATGTAATATATATGTGTATATATATATATATATANNNNNNNNNNNNNNNNNNNNNNNNNNNNNNNNNNNNNNTCCTCTGTATTAAGCATAAATTAATTAAGAGAACTTAGCTCTTTCTATTTAACATCAACAACTTCAAGGAAACATGGTTGCTTTCTTAAAAGAATCCTAAACTTGATAGGATATCTTTTCAAGCCAGGATTCAGAGTAGAAAAT…
G1_V2_SSR_45634	c	(AG)7ac(AG)9	34	AGGTAAAAGCAAAAAGATTGACAAGCAAAAGCTGAGGTATTTCTATTTCAATTATTTTCTTATTCAATTGTGAGAATGAAGCTGACAATATGATTTAACTCCCTTAAAATTATGATAACCTTCCTAACAGGAATGAGCTTTTGACGAACATTTTGTGGCCGATTCTCAACACTCAAATCAAGGTAAGAGCAAAAGAGAAAGAGAGAGAGAGAGACAGAGAGAGAGAGAGAGAGCAATAAAATCTACATGCAAAACATATTAGTTCATGTTCCAGAAGTTTTCTTGAGCAAGAATTTAACAAGGATGAAGAAGGGAGCAGAGGGAGAGCAACAGAGAGTCTTCCATGTAAAGCTTTTAGGTCTTTATTGGTCAAAACCTTATCCAACCAACAAAATACCA…
G1_V2_SSR_4603	p2	(AT)10	20	AACTAATGTTGAATTAATAACCCACAATAAAGTATATGCTTTAGTTCATACCGTTTTGGACTTAATGGATGCCTATAATTTCATTGAATAATTTTTGGTGGAAGTGTCAACTTAGCTTAGCTTCAAAGTTTTTAGAATACTGAATAAAATCAATCAACATTTAAATATTATAATGCGTGTAGAATAACTTTACATATACATATATATATATATATATATTAATCTAGAAACTTCAATTGTTAAAATACAAAAATCCCAGAATAATGTTTAAAGTTTTAATTTAAATTTCATTTTGTTATACTTCGAGTTTCAAAAAGTAGGAGGAATTTAATTGTTCATCTTACAGCTGATACAATAAATTTAATTATTTCTTTAAATAAGTAAAAATATATATATATA…
G1_V2_SSR_24828	c	(TC)6tggtttaaaaaatgttttcttctctctcc(CT)9	59	TACCCCACACACCAAAAATATGTTCCGCTTTAATGAATGAAGAGAAAGAAACAAAATGGAAGAGAGAAGAGAGAGAAAACATCCAACACTCTCTATGTACGTGTTTGTTTGTATAGCTGTTTTGTGGAGAGCAGAAATAACACTGCTGGCTGGCTCTACATGAAATTTGAAGATATAAAAAAGGTGTGCGTGTCTATCTTCTCTCTCTCTCTGGTTTAAAAAATGTTTTCTTCTCTCTCCCTCTCTCTCTCTCTCTCTNNNNNNNNNNNNNNNNNNNNNNNNNNNNNNNNNNNNNNNNNNNNNNNNNTTTACATTTGGGGTTTTTATCGTCCAAGTCTACTAGTTTTAAAATATTTTAGTAACGATATAATTCCATCATTCGTATTAAATAGATCCAAA…
G1_V2_SSR_30147	p2	(AT)10	20	ATATATATATATACATGTTTTCTTAGAGCATAAGATTTAACAGTTGAAACAATTCATTTATTTGCAATGGTGAATATGGTGCGTCGTTTATGAGTTTTCTTAGTTTTTACCCCTATAAATATATTGAAAATAAAAACTAAAAAGAAAAAAAAGGAGGTAAATACCTGGTGAAATTAATATAGGTCAAAAGTGTCGGTGAATATATATATATATATATATANNNNNNNNNNNNNNNNNNNNNNNNNNNNNNNNNNNNNNNNNNNNNNNNNNNNGCTGTGTGGTCCAGATCATTTATACCTATATGTATCCGATCATTCAACTACGAAATTAAGATTTAATGATTTCAAGATATATTCGGTCGATCGGGTGGTTGGTAACCCGCGAGTCCTGATGGCTGAT…
G1_V2_SSR_10515	p2	(TA)11	22	GGCAATTTGTGGTGTACACAAACGAACAATATACATACATTTATTTATATATTGAGCAAAAAGATATTGTATTTATTAATTAAATATTAAATTTTTTATAACTTTCAAAACGATCGATTATACTACTTCCCTATTTAATTGATGAAAGATGTGTCATTTGAGATACAAAACTTGGGATAAGATTTAAAATACGTAGTATTATATATATATATATATATATACATATATAATTCCAAATTTTTATATCGGTAGATGCAAAAATACTGCTTATTGTTAATTTAAGATAATTGAGAATTGTTTCTTCCATAGGCTATTTTCAAGAGGTATATATGAGTCAAAAAACCTCTCACAAAACAAATATATGTATAATCAAAAGTTGAAATTGCAAATTAATTAAAA…
G1_V2_SSR_56626	c	(GTC)7gttg(TCA)7	46	TAATAACATTAAATTATAAATTTTTTGTTAATTTAATAGAAAAATCTGACAAAGGAATTTTAATAATTTTGAATTATTAAGAGGGTAAATGTAAAAGTTTGAATCTAACAGGATAATTGTAGTTTTCCTTTAATATATTTTTTAGTTTGATTAATAGACAAAGGTGGACTGATCACCTTTAAACTTTTAATACTCTTATGTCGTCGTCGTCGTCGTCGTCGTTGTCATCATCATCATCATCATCATCCACGCCTTCTTCTGGTGAAAAAGGATAGAGATTGATAGCCGAGTGGGGTTGGTAAACAAATTCGACTTCAGCCCGACCTGGGTAAAGCTCAGATTATAGAGCCAAAGTAAACCTGACTTTAAATATGTTTTAGGCCAAGACTCATAAGTCTC…
G1_V2_SSR_18211	c	(A)10tgacaaatagcataatgacacatgttacggtgatatg(TA)10	67	ATAAATACTTGTTGAAGTTAGCATCTCAAAACCTTGTTCAATATGAGTTTTAAGTTTTTTATTCTTCTGGGTATTTGATTTACAAAAGCTAAAACATGTTTAATTAATTTTATGTTTATTTTATTTAGTTGACTTAATTAATTTATTTTTTATTAATGCAAAACAAATGAGAATAATGGGGAAGTAGGAATAACGGGTGAAAAAAAAAATGACAAATAGCATAATGACACATGTTACGGTGATATGTATATATATATATATATATATGAATGAGTTGATTGCCACTTTATATTATATCAGTCTTTCCCACTATAAATTATGTAAATGTACTATTTTGTCCTTTTTTTAATTTAAATAAACAGTAAAGATTAACAAACCAGGATTTTTTAGAGTATTTTT…
G1_V2_SSR_27812	c	(TA)11nnnnnnnnnnnnnnnnnnnnnnnnnnnnnnnnnnnnnnnnnnnnnn(CATA)5	88	ATAGAGCATGGTCGCTTCTGCAAATATAACACATAAAAAAGCTAAGACTATATAGTATCAGTTTATACGAGAATATGAATCAGTTTCAAAGGTAGTGGCACAAGTTGTTGTCTTAGATACATATATTATTAATTGTTTATTTGGTTTCTCGTATGAACAAGATTTATTAATGAGATATTATTATGTGTCTGCGCGTCTGTATATATATATATATATATATANNNNNNNNNNNNNNNNNNNNNNNNNNNNNNNNNNNNNNNNNNNNNNCATACATACATACATACATAGCCGGATGGGGAATATCTAGTTTGATAAATCCAAGTGGCGTTGCTAGCTCTATAAATATTGATACATCAAAGTAATTGAAAAGGCAATAAAAAGCAAGGAGGCCAGGGCATT…
G1_V2_SSR_35069	p2	(AT)6	12	ACATGAATTTTTGCTTATATAACTTCTTAGAAAGGGGCTCCTATGAGACGACTTTTAGGCCTCCATGACTTTGTAGGATGGGGCTTTTAGAATATAGTATGTTAGGAAATAACTTGCATAGTATGCATGTGAAAAAGTGACCTTATTCTTCTTCCAAAATTACCTTTATTTATTATTAGAATTAATAATTTCCACAACAATATATATATATNNNNNNNNNNNNNNNNNNNNNNNNNNNNNNNNNNNNNNNNNNNNNNNNNNNNNNGTAGCGAAATATTACTTTGACTGTTTAAATTTGAATTTAGCATTGATTACATGGAATTGGAAGTTTAATAATGAGATGGGCATGTTAAGTTATCTCAAGCACACAGCCAAACAAAATTTTGGATCCTACATCTA…
G1_V2_SSR_64592	p2	(AC)6	12	AACTTATCTGCACAATCTTTAATTTTACTATTAGGAGTAATCAGTACATTAAATTAAACCTTAGAACCTGCATGGCCTGTACCCTAATTATTACTAATAATAACATGAGTTTTAAGACTAGCTGGTCTTCGAAAGCTGCTTTTTGTTTTTTTATTAATATTACAAAAATATAATATACTAATATTTACGTTATACATATACACACACACACTAAGATTAAAGATATTTACACACACATATTTGCTTTCATATTGGAGGGGTTATTTGCCTACATAATAGGTAAAAAAATCCTCACAAGTATCCTCATATTGCAGGCATATAAGAGTGCGAGAGTCCTACTATAGACACGACTCGAACATACTTTATTTTTACCATCTTATGGTTGGTTTTTAAAGTTAC…
G1_V2_SSR_34185	p3	(AAG)9	27	AAACAAACTGTTGAGTTCAACTTTCAAACACAACAGAACAGAAATTCCACAAACTCTTATTCTTAAAGAAGATCAATTATCAAATATGCTTACCTTAAAATAAAGGTTATAAATTGAATCAAGAACACTTTAACTCCAACAATTAATTGCAATTAATACATATTAAGCAACATTATGATTTGGTCATTTGAAGATGAATAAGAAGAAGAAGAAGAAGAAGAAGAAGAANNNNNNNNNNNNNNNNNNNNNNNNNNNNNNNNNNNNNNNNNNNNNGTATGTTTTAAATGTGTGGACATGGAGACATTTTTGTTCAAAATAGAGGAAAAAGGGCATGTTTGATTGAAAATTTTGAAGGGCATTTTTAAATTTTTAGGGGCAAATGAAGGCATTTCTGTAATA…
G1_V2_SSR_47026	p2	(AT)7	14	ACAAAGGGAGTGTTTGATAAATATTTATTAAAGTAATATTATTCGTTTTAGGAGTGTTGTTCCGTTCTAAAATTGACACGTAAAGTATTTTGTTTGAAGCTCAATTAAATAGAATTTCAAAAAGATTTTTAATTAATTAAATAAATAACTCTTAATTAAATAATCATTTACTTGAAGCAAAATAAACAAATAAACATAAATATATATATATATTTATCAAAAATTCTAATATATTTAGCTAGAAGATACAAATGGATATAACAATAATTTCAGAAATTCTATATGATTGAATTTTAGTCCAATATTCCTTGAAGCAAAGAAATTTACGTAATAATGTTCGACTAATTTTAGAAACAAAATTTATATGTACAAAATTTAAAAGTGAGAATGAGTAATTTA…
G1_V2_SSR_62404	p2	(TA)7	14	CAAAATCAAAAACTAAAATCAGTTGTCTATTTGGTGTAAATTCAATGATCATCTTCAAAATTAATTAATTAATTAGATAGATACATATATTACATTACAATATGTAATTACATGGAAATTAATTAAGATATATCTTGATATTTATCCATGGAGCTTCCTCTTGTAAGCTCATCGAAATGCAAGAAACCCTAATTTATTTTATATATATATATATNNNNNNNNNNNNNNNNNNNNNNNNNNNNNNNNNNNNNNNNNNNNNNNTTTAGGATAATTTAAATTGTCAACTACTTTTTATTGGGTATCCCCCAACTAATAAAATCAAAAATATGATGATATATGATACTTGTATATAAATTAATTAAATTTTGAGATGATGATGATGATATGTGGATGGAATAT…
G1_V2_SSR_32834	p2	(TA)6	12	AAATATTTTAAAGTTAAAGTAAATGCTTAAAACATTTTTTTTTAATGAAAAATTAGTAGATGTTTCAAAATTATAATTATATATTTTACTGTTTTTATTAAATATTAAAATTTATTCAGTTATAAAACTTCCATAAATGGGGAGTCAATTATACCCAAATTTCTATTTTCATCGTTCAAGTTTTTTTTCCTTTTCCCGGTATATATATATANNNNNNNNNNNNNNNNNNNNNNNNNNNNNNNNNNNNNNNNNNNNNNNNNNNNNNACTATCAAGGACAATTTGGTAAATTCGAAGGCCTTTAACTTATGAAATCCCAAACTGAAATTGGAAGATAGAATCTGAGCGCTGAAACAAAACTAGACCTCTTTCACTGCTTTCTTATTATCTCGATCAAAATC…
G1_V2_SSR_5490	p2	(AT)7	14	ACATTTTAATATATATATATATATATATATNNNNNNNNNNTCAGATGACTGAAAGTTTTAAAAGCTATTATGATATTATCGTGAATTTTAAAATAATTTATTTTCATTGTATTGTAAAAATATTTAACTTTAAACAGAATCGATTAAATATATAGTACATTAGTGAATGTTATTGAAAAATAAATATCTTCACATTTTAATATATATATATATTAAAATTAGATATCTTAATTAGAGATCGATAGGAATTTAACTTTATAAAATTTTTTAGAAAACTTATAAATTATTAGATTATTTTTATTGTATAGTTGAAATTGCACTTTAGAAATGTATCGTTATGGTACATCAATTATTGAGTAATTTTTATATATATATTTGTCAATTGAGCAACTTTAGCTT…
G1_V2_SSR_28280	p4	(AACG)5	20	GTAAAATTTTAACTTTATTCTATTAAAATAAAAAACAATTATATATCATTTTTCATTAAAAATGTATTAAAGACAAAAGAAAATTTTCTCTATTTGATTTAACGGACTTGCTAGAACAAGACTAAGGAAATTATGTCTAACATTAGGGATTAAGTTGAAATTTGCCGTTTCACTTCTCTGGTGGATAACTGGATAAATTAACGAACGAACGAACGAACGNNNNNNNNNNNNNNNNNNNNNNNNNNNNNNNNNNNNNNNNNNNNNNNNNNNNNACAGAATCTCAATGGCAACTCTGAGCCTCAACAATTCAACAAGAAAAAACTCTCCAACTCTCCGCTCTCACAAACCCGTCTCTAAATTCACTTCCTTCACGAAATCCACAAAAGTCTCCTTCAGTTT…
G1_V2_SSR_63290	p2	(TA)9	18	TAGCCGCATAAAAAATAAATAATTAATTAAATAATTATAGGAATCAATGACAATTATATTTTAATTTAATTAGCAAATCAAAGAAGGATCATGGAAACATCAATTAGTGTGTATGATTAAGTTTCTATCATAATTTTAAACCCTAACTAATTTCATCTATTTAATTAATTAACCTTTTAAGTTGGTAACCTAAGCTAATTATATATATATATATATATNNNNNNNNNNNNNNNNNNNNNNNNNNNNNNNNNNNNNNNNNNNNNNNNNTATGTATTCGGTCATTTTGAAAAACAAAAAGGAAAAAGATTGTTTCTTTTAGCACATGCATTCATACTGCCTTTTTAATTTTTTATTATAGAATTTTTGTTGTTTATCATTCAATTTTCAAACAATTGTATA…
G1_V2_SSR_11651	p2	(TA)14	28	GCAAGGAGTAGTGTGACAAACATGATAATGGATAATTTGGAGGTGTCACCAATGTCTAGTATTTCTTCAATTACTTTGTTTAACAAATTTAAAGTTAAGGATGTGGGTTTACTTGAAGAGAGGTATTTATATCTATCATTTATTTATTTATAGTCGGATACCATTTATAATTTATTGTCATTTATGTAAACAATCCATGTATATATATATATATATATATATATATAATTAGCGTTGTGTAAAACTAACTTATATATTAAAATGTGGTGTAGAAAGGCTGTTATATATGTTGATGATTAATTTTGATTTGGTTTTTTTGTCAATGCTAGGGATTGAAACTACTGAAGGCATCTTCGCAGTGCAAGGCTGTTTTAACAAGGGTTTTCCTTGGGAACTAAT…
G1_V2_SSR_10935	p2	(AT)9	18	ATTAATAAGAGAGAATATGTTATTCTCAATTTATAAGATAACAGAGTCAAATACAGATTACGAAATTCATAAAAATCCTTTTTTATATTATCGATGATCCTTCTCATATTTATCAGTTGACTTACATTTTAAAAATTTTTAAAATCATAATTTGTTCTAAATCAGTTAAATAAGTTATGAAAATTGAATCCCACTGTACATATATATATATATATATNNNNNNNNNNNNNNNNNNNNNNNNNNNNNNNNNNNNNNNNNNNNNNNACTAGAGGCTTATAAAAATCCTTTATATGAGTAAGAATACAGTTTTCTCTATTTTATGGAATTCGACAGTGAGAGAGACATAATTTAACCATTAGCATGTTTGAATTTCTATCTCTTTGCTAGTTTGGATATGGA…
G1_V2_SSR_64593	p2	(TA)7	14	ATAAGAATGTTAATCTTTTGATGTTGATTATTTATCCGCATTTGTAAAAAAATTCTACTCTGAAGAAGTCTACAATTCCTCCCCGCAAATATATGTGATTTCATACAACTGCATCAAAATGTAACTAAATATAAATTAAAGCTCATGAAAATGAAAATACCCACAAAGGATTTATTTTTTAAAAAAATTATTGTTTTACTATATATATATATANNNNNNNNNNNNNNNNNNNNNNNNNNNNNNNNNNNNNNNNNNNNNGAACATGTAATCTATTGTGAGTTATATTCTCGAATGATCACTAAAGAAACATGCGCCCTTCTAGCTACATATACACCTAATTCATTTCATTTCAAGATCGTTAAACAAGAAACCAGCAATATAATAAGAATTCTCTCCAAT…
G1_V2_SSR_23279	c	(AT)6ttaattaataataataatgagaaaaaatttaaaacatataactttcttttatttataaatttattgatattatgctagttaaagctttcttttttt(A)10	118	ATTAAAGGAATATCTCTCGTACCAAAAGACAAAGGAAAAACAAGTGAGAAGAAAATTAACAGTTAATTACATTGTATTAAGAAAAAATTTTAGATGAAATAATGAAATATATATGTTATATTAATTATCTATATATTTATTCAATAATGAAATAAATATACTATATTAATTATCTATATATTTATTCAATAAATTTTTAATATATATATATTTAATTAATAATAATAATGAGAAAAAATTTAAAACATATAACTTTCTTTTATTTATAAATTTATTGATATTATGCTAGTTAAAGCTTTCTTTTTTTAAAAAAAAAANNNNNNNNNNNNNNNNNNNNNNNNNNNNNNNNNNNNNNNNNNNNNNNNNNNNNNNNNNNNNNTATTACATAAGAGATTATAT…
G1_V2_SSR_16613	p2	(AT)10	20	TAAGATTATACATACCAAATAAGCTCAAATCTAAATTGAAAGCATGTTCATAGATATCTAACATTTCTTTGGCTTAAAAAGAGAGGAAGAACAAAATGGTAAAGAAAAAATATACTAAATTAGGAAAAGGCACAAGGCAAAAACCAAAAGGGAATAGAATTCTATCCTTGAATAGTAAAAGAATCCATTTATTATATGCATATATATATATATATATATNNNNNNNNNNNNNNNNNNNNNNNNNNNNNNNNNNNNNNNNNNNNNNNNNNNNNNNAATCCAAGACTTTTGCAAACATTATGATAAAAGCTAATGGGATTAAGCAATAAAAGCATGAGCAAGCTAGAATGTGAGCTTTTTATAAAGAGAAGCACTTTTAGGTATTGAAAAATTTTTCCACT…
G1_V2_SSR_13920	p2	(AT)8	16	ATCGATCCTCTAATTCCCTCCAATCAATAATAACAATTAAAAAATTCACATACATTTAGTTATAATATATTAATTAATAAATTACACACAATTATATGTGCAAACAAAGCGGTTAAGTTACGATGTATCTAAGTAATATAATATTGTAACATTGAGTTATAAGTTTCTGGAATTATGACATTAATTAAATTATCAAATCATATATATATATATATNNNNNNNNNNNNNNNNNNNNNNNNNNNNNNNNNNNNNNNNNNTAATAATATTTTATTAATTTTTCTAACGGCATCAATCAGTGAGTTGAAAGTTGCTTTGATCTATTGCATGCTAGCTTTTCCTTCCAGTTAATTAATTAATTAATTAATTTGTTGTGGAGTACATCCTTAGTATCAACGGTAC…
G1_V2_SSR_18423	c	(CT)12caa(AT)11	49	ATCCCATTCATCCACCCACTCATCTCTCACGGACGGCTATGTCTGTGCCCCCCCACCTTCTTTTCTCTTTCAATCTTCATGATTCCCTTGTTGGTCCTAAATACAATTATAGCATAATCATTTTTACCTCTTCAATCCCTGGCTGTAAAGGTAACTCCCTTTTCCTCCCTCTTTCTCCTTTTTCAATTCTACTTTTATACTCTCTCTCTCTCTCTCTCTCTCTCAAATATATATATATATATATATATAATACATGTTTTAATTAGCAACATCGTGTGCACATATATATACAGATCACGGTAAGCAAGTAAGAAGCAGCAGCCCTAGCTCAACATTTATCTTATTATTAATATATACAATATATTCCTATATACCACACACATTATATATATATATATA…
G1_V2_SSR_10350	p4	(AAAT)8	32	TATTATTATTATTATTACCTGAATTGAGTGACAAAATGGTGAAGAAAAATGGAAGCTTCAAGTCTAGCCAAATCAAGACCAGGACATAATCTTTGTCCTCCTCCAAATGGAGTGAAATTACAGCTGCTTATTATGTCTTTCTCCTGTATATCAACAATTAATTATTAATATTAATCAAACCACAATAATTAAAATCTCAAAATAAATAAATAAATAAATAAATAAATAAATTTACTTACTTGCCACCTCCAAGGATTGAATTGGTAAGGCCAATCATAATTATTTTCATCAAGATGAACAGATCTAAAATATGCAAAAAAGCACCATCCTTTTGGTATTAAATACCCTTTTATTACAATATCTTTCATTGCTTTTCTCATCACCCCAATTATAATATTT…
G1_V2_SSR_19517	p2	(AT)8	16	ATTAAAAATTGATTAGTATAATAATTAAATGCCGATTTAATCATTGCATAATCATTGAGAATCTCTTTCAGACAAAAACTAACATTATTAATTTTTCATTATCATAAAATCTTAATACTGAAAATCAAAAGGATATGCGTATGATTGGAAGCCACATTTGAAGGAGACAAGTCCATTGAAAAATTAAGTGTGTGTATAAATATATATATATATATANNNNNNNNNNNNNNNNNNNNNNNNNNNNNNNNNNNNNNNNNNNNNNNNNTAAAATTCTATATTTAAAGAGTAGAGAAGCAAATCAATTTCTCCCACCTTGTCTCTCCAAAAATTTTGTAATGCTCTGATTTCTTTAATTAACTATCATTCTCATCAAGGTATGGCTTTGAATCGAATACTGGA…
G1_V2_SSR_25757	p3	(ATG)6	18	GCATACTGACATCACATGGAACCCTTTCTTTTTTTAAGTTAATTATTTTTAAATTAAGTTTGATAACGTTATATTATATGTACAATAATCTTACTTAACCCTTATTATATATAAACTGTAAATCTTTAAATCATGAATCACACCTTTAATTATTGAATAAACCATTAACAACGACGACACTGATGATGAATGATGAATAATGATGATGATGATGATGCAGCTTCAACATTATAATTTTTCTTTGTGAATTAATCAGAAGCTTGAGTTGTTTAATATCTACCTTCAGGCTTCAGCTAGCAAGTCCAATGTTGAAGCCACTTCTTCTTCAAAGCATCTCCATGCAATGTAGCTTCACGTTTCAACTTAGTAATCTCCTTCTTCTTCGCTTCATCTTCCCAA…
G1_V2_SSR_4149	p2	(AT)10	20	CCAATGCCACAACCACAAACGAAGTCAGTTGCTCCCTCCAGACTTCCAACATCATTTCCTAATAGTCCATTTTACTCCAATTCTATGAACTGAACAGAATTCTAAACCAGTTGATTGGGACTAAAATGTCAAATATGAATCAAGTTTATAAGCGATTGCCATCATAGCACTACAATTTCTATTTTCCCACAAGTTACAAATATATATATATATATATATAAAATCNNNNNNNNNNNNNNNNNNNNNNNNNNNNNNNNNNNNNNNNNNNNNNNNNATTAACGTTACAACGATCAGCAATAAAATACTACACATACCCGACTAGTGATTAGGACAATCACTCTGTGATGCCCAAGACTGTCGACAACCCTAACACTTCCCTTCAAACATCCTTCTTTTCGG…
G1_V2_SSR_11235	p2	(AT)8	16	CTAATTAATAAAATAAAAAATAAGAGTCTAAATTAAATGATAATATTTAAGTAATTTAACATTTGTCTAGTAATATTAGATATATTTAGTCAAGTAAATTTAAATAATTAATTATTATTTAATTTTTAGTGTTTCAAAACAAGATCATTTACCACTTCATCTAAAATTTTAAACTTGAAAAAAAAAGATTCAAACCACAATATATATATATATATANNNNNNNNNNNNNNNNNNNNNNNNNNNNNNNNNNNNNNNNNNNNNNNATATGTCAATTTCACATATATTGAGTTGAAGGTAATTAAAAAGAGTATTGTTGGCTCTATTGCTTCTTCTTCTTCCTTTTCCATTTATCACGAGAAATTAATGATTTTATATATATATATCCATGACGTAAATGCA…
G1_V2_SSR_3514	p2	(AT)10	20	TTTTAAATTAAAATGAGAAGAGGGTACTCTCTCTTCTGATGATAAAATTAAAAATCCTCTCTGAAGGGCATATATGTGAGAAGAACTGACCAATTATCATTTTCAAATTGGAAGAAATTAAAGAGAAATTAAGGAGAAATTAAGCAAACACAGAATACGTCCATCTTCATTTTAGTAATATTGCATAGTGCATAAGGTAATATATATATATATATATATNNNNNNNNNNNNNNNNNNNNNNNNNNNNNNNNNNNNNNNNNNNNNNNNNGAAAATCACGAGCAAGAAGCAGCAGAATGGGAATACTTCAGGTAAATTAACTGAAATGTTGTGAAGGAACCAATTATGAGGATAAATCTTTCTGTTCCTCTACGTACGTACTCTCTCTCTCTCTCTCTATA…
G1_V2_SSR_26892	c	(TA)7(TG)9	32	GACAAAGTCCCTGAATCTCTCAACAACATCAAGAAGAAAGCAATTGCAAGGAAGATCCTCTAGAAGAATTAATATGATATGAAGTTAATTAAGAAGAAAGAAAGAGACAATTAAATTAAATTAATTAAAAATAATAATCAATTGACATTGAACAAAATAATTGACTAATTGCTGGTACGTACATTTAAATATGTATGTCTATATATATATATATGTGTGTGTGTGTGTGTGTAATATATCAGTATTATTCTACGATTGATTAATTAGCAATAAATAGATATCATAATCAGTTAGATTGTTGTTAGTAGACTTATTTTTAAGCCACCTGACTATCCCTATCCTATCAAAATGTTAATTTCTCATTGTCCCAAGTGTCAATCGCAATCACCAAGTGCAAGT…
G1_V2_SSR_28283	p2	(TA)6	12	TAGGTGATGATTGTATTTCGATTGTTAGTGGATCGAGAAATGTTCAAGCAACAGATATAATCTGTGGTCCTGGTCATGGAATTAGGTAATAATTCTCGATTCTACTCTATTAATTAATCAATCAACTAATTTTTCTTTTTAGTTCAACTAATTTCAACTAAAACGTTTCTAATTCGAGTATTTTATATACATATATATGTATATATATATATNNNNNNNNNNNNNNNNNNNNNNNNNNNNNNNNNNNNNNNNNNNNNNNNNNNNNNNNNNNNNNNTGGGAGCTGCAAATTCAGAAGCTTTCGTTTCGAATGTGATGGTGAATAGAGCAAAACTTTCAGGAACAACAAATGGAATGAGGATAAAGACTTGGCAGGTGAAATATCCGGATATACATATATT…
G1_V2_SSR_15940	p2	(CA)10	20	GTTATCTTTTTCTATGACATTTAATATATAATTAGATTAATTATATATATTCCATTATATACAGTAATAATTAAATGAACATATATGCATGCAGGGTGGTAAATATATTAAAGAGCAATTAGAATTTCCATTTATTAGCTTAATGGGTATATATATAGAGGAATTTTGTGAAAACCTCACCTGACCGCCCCCCACCACCCACACACACACACACACACATCATATTTTTATATATATCATTCGTGAGCATCATCATTGCTCTAAATGAAATTCATAATAGAAAAAATTTGTAGATTTGATAATAAATTCCAAATATAAATACAATCATAAAGCTAGCTTCAATTGAAAATGACAGAAATAATATAAATATGGGCACAGAACCATTCAAAAGCTAGTTTC…
G1_V2_SSR_11654	p2	(TA)9	18	TTCGGTTTTTGGATAAATATATATACAATTATATGTGTATATATATTTATTTGCAAGATCAGTAGTTCTTTTATTTTATGCAAAATTTTATATTAATTCTAAACTGTCAGATATCAATACATTCAACGGTTAAGATTTTATTTAACATATGCATTAATTACATGATTATATGCAATTTTAACTAAACAGATTACTCTTGTATATATATATATATATATNNNNNNNNNNNNNNNNNNNNNNNNNNNNNNNNNNNNNGTAATGGATCTCAAGCTAGGTAAGATAAGCTTGAGCTTGAAACTTGAGTGGGCTATGGATCATACATTCCTACAAATACAAAATAACTTGTGGGCTTCATTGTTATTATTATTATTATTATTACTATTATTAATTTGGAAGTTT…
G1_V2_SSR_15731	p2	(TA)8	16	GTGTCTTTTCCTTTAATTGAATTGATAATTGGTGTAGTATGTGCATACGATGAATAGGTTACCAAGTGTAAGGAAATAAGAAAGGAGAAAAGTTAGGCTTGTGCTTATTAATCCATCATATGGCCATGTGGCAAAAATATATGAAAAAAAAGGTTTTGTTATTGCAGTGGGTGGATTTATATGTAAATGTATATATGTTTATATATATATATATAACCTTTGCTTTTACAAATTAGAAGCAAAGGTCAGAAAATGAAAATAGAAAGAGAAAAACGAAAGACGAAAAGGAAAAAGAAAGAAAGAAAGAAAAAGAAAAGAAAGGAAGAAGGTTGGATTTGAATTTATATTTTAGATGACTAATGTTGGTTTTAAAGATTTGTAAATTATTTTATATGATTT…
G1_V2_SSR_6796	p2	(AT)7	14	AAATTTAAATTTAAATGCGCAGAATGAGGAGAACCATACTAATATTTAAGGGTCTAATTGATCTTAGAAATTAATCCCTGGAAGAAATTAATCCTGATAACATTATCCTAATCATATGGGGTTTTAACAATTCACAACCTCATATTTGTCATATATATGTAACCTTATATTTATTCGTCTTAGGCTCAATTTATAACCAATATATATATATATANNNNNNNNNNNNNNNNNNNNNNNNNNNNNNNNNNNTGAATTAAAAACAATTATTGTAACATCAATACGTCTAATGTAACAAGAGATATGTGATTTTAAACTTTTTCGTAATATAATTTGGTTATTTAATTTTGTTCTTAATTAGTAAGGAAAGAAAATATTTACATTGAAATAATGAAAATGATT…
G1_V2_SSR_10770	p2	(TA)9	18	TCATCTCTTTAAGATGATACGAGCAAAACATCATCATGTATTTATGTATGATTGGAATTCGAATAAAATGTTGACCTTGGTGAAATTCCACAAAATTGTGAACGCGTCCAAGTTTTCATCATACAGGATTTCAGCTCATACCTTCCGAATTCGCCTACCGCCTACTTTGACTGAATTATAGCCGACAATAAAATATTGCTATATATATATATATATAGAAACAGCAACACAACACATATTACAGCAGCTACAAATTTTCAGTTCTTCTTTCACTTAAGCGTTCTTCTGTTTTCAATCAACCATGATAATACAATTATTCTTCTTGCAATCCATCGTCCTTGCAATTATAGTTTCCATTTTCTTCCTCTATCGCTACACAAAAAGTAGCAAAATTCACCA…
G1_V2_SSR_62031	p2	(TA)7	14	CCTCAACTCCACCCATAGAAATTTGCAACCTAACCAAACCCTAAATATAATTATCTTTGTGTTAAATATTAATGGGCTCTTTTTTGGGAAATTTTATTCTACTTTTCTTTTAATATAATCCTACTTAATTTGATACTGTTCTTATTACATATGCATGAAAACTACATCTTCTTCTGCTGGCTTATCCATTATTGCCAACTATATATATATATATNNNNNNNNNNNNNNNNNNNNNNNNNNNNNNNNNNNNNNNNNNNNNNNNNNNTTCATGTGGGTTGTAGGTTTAATTTTCTTTTTCTCATAAAATATCAATAAAAATTTTGAAATTACTTATTGTTGTTGAGTTGTATAAATTAATTTTCTATAATGGTTTTTGTTCATGGGAATGTGTATGTGGTG…
G1_V2_SSR_27817	p4	(AAAT)5	20	TTTATATTGTAGTATTATCTTTTATATAATAATATTATAATTTTAAGAATAAATTAAATAAATGTAACATCAAAAACCATGAGGTTGGGGTGAGGGTGTTTGACTAAAATGAGTGGGGAGGATGAAAGTCTGAAAGTAATAAGCAAGATAACAAAAGGAGAGAAGAGAAGACTGAGTGGTCCCAATTAAAAAATAAAAAAAATAAATAAATAAATAAATAAAAGCTGACAAAAATGAAAGAAAGCAGTATTGTACATTGGGTATTGTTCAACATTAGTAATAGAATTTTACATTGGGTATCGTAGAGGATAGCCGAGTACATAATACATACACAGAGAGAGAGAGAGAGAGAGAGNNNNNNNNNNNNNNNNNNNNNNNNNNNNNNNNNNNNNNNNNNNN…
G1_V2_SSR_23821	p2	(AT)6	12	AATAATTTCAGTGAAATTATCTTTCGGGTTTAATAAAAAGCAAATCAAAGCCGATATAAAGTTGTGAACGCCTGTTTTCTGGTCACTCGAATCCTACCTTTCAATCTCCAAAATCAAAAGGAATACTGAAAGAGCATCAATGCAACCACTGGAAAATAATATCATTTAAATTAAATAACATATATTATCACGTGGTAGAATATATATATATACACACACACATTCTAGAAGTATAGATTAGTCAAAAGTTAATTTCGTCATGCATGAATATAATTGAACTTGATATCCAATATTTATTCCCACTATGATTCGCTTTATCTTTTTATTTTTTTTAATTCCTTTTATTTATTTATTTTCAATTTTGTCATCATGCATGTTACATGGCGATTGGGTCATTTT…
G1_V2_SSR_15732	p2	(TA)9	18	GCAACCTCTAAATTGTAGCTATACGAATAGCATCATCAATGCAAGCCAACCACAATAGCATATCAAAGGGCAAGAAATAATGTATCAGTTAACCCAAACAACCTAAAAACCAGTGCAAACACTTATTCATAACAGGTAAAACTTCTCAACTATAAACCCAATGTTCCAAGTAGTATATGTATATGTATGTATATGTGTGTATATATATATATATATANNNNNNNNNNNNNNNNNNNNNNNNNNNNNNNNNNNNNNNNNNNNNNAATTTCACTGTTTGTTGCCTACCATGAGTGCAAACAAATAATCCATACCAGTTCAGAACAGGTTATATGTTGGTTATATTGAATCAGCATACATAACCATATTCTTGACATGACAAATAAATACACAAACTAGAAA…
G1_V2_SSR_11197	p2	(TA)9	18	TCATTTTAATGAGTGCTACTCCCACGTGCCATTTTCCAATCACGAGATGACAAGTGTCCCCCAAAATGTGGGTCTCACTTCCCTTAAGCCAATCACGGGATGGAGTGGGGACACAACCAAATCCCGGTGTAAGTCCAATTAATTAATTAGCATAGATATGTATAATAATTATAAGCTCCAAATTATTAGCATCATGATCTATATATATATATATATATNNNNNNNNNNNNNNNNNNNNNNNNNNNNNNNNNNNNNNNNATTAATTAATTAACTAATTAGATGATATACAGTTGTTGATTATTATCTTGTATTGGACTCTTGTAGGGTAAGATTTGAAGAAAAGGTTGTTTGTCATTATCTTCATCCACCATATCTGACTATGGTTTAAAGAAGATTGAA…
G1_V2_SSR_15065	p2	(AT)8	16	GGAATCTAAATAAGCATTATGCTTTACAAGACATCGCTTGGCTCAGAACACTGACATAGCTATAAGGTTGTGTGGTTAACGTTGTTCCACATGGATAAAATTTTCTTCTTTTTCTGTTTCTGCCGATAGCCGTTGGTTTTCTTACGACACGTTACTGTTTACACCAATCAATTTAATTACAGATTATATTTTTTCGCGCATATATATATATATATANNNNNNNNNNNNNNNNNNNNNNNNNNNNNNNNNNNNNNNNNNNNNNNNNNNNNTCCAGCTGCAAGTTGTGAAACTTCTCGTTTGTAATTTTCTCTCCTCATATGTCAATCATTATCTTATTATATAGAACACTTTCATCAAATGATACCTTTCCGTTAACATTTTTTTGAATTATCAAAATTG…
G1_V2_SSR_25840	p2	(TA)9	18	CAATTAAACAATCCTCAATAAAGTACGATTAATAATTACACCAACTAAATAATTAGCTTATTAAAAATTTAATTACAAGTCATAGATAAAATATAAGCTCATTGTTGTATGAAATTAATTAGATAAACCCTCCCATATATATTTTGTTTGTTTCGGAAGAAAGAATGATGAAAATGCATACATTCATTCCCTTTGGTACTATATATATATATATATATNNNNNNNNNNNNNNNNNNNNNNNNNNNNNNNNNNNNNNNNNNNNNNNAGGGTGACAACGACTTGGCTGCAAATAAATACAATTACATTTAATATTGACTCAATAATTTAATTAATTTCTTGAAATTGGAGACAATTATTAGGAAAATAGCTAGAATTTTAACGATTTCTTTCAATATATAT…
G1_V2_SSR_8856	p3	(TGC)8	24	CCCACTACATGGATGATTCCCTGCACTAGAGGACGCCATTTAACATCTTTAGCTCGTGATTTGCCCCTCAAACTGAGGATGTTTTTACAAGGCCTAAAATAATAACTTGGAATCTGTAACATCTATTTAGTGTTGGCTTGAATTCTTCAAATGACACCGAAATAATCAGGGGTTTTACTACAAATTGCTTGCTTGCTGTTGCTGCTGCTGCTGCTGCTGCTGCATGAGTGCGATAACCAAATGTAAGATTGAAATTGGAGCCAATGCTTTCCGCGATTGCAATGACATATCACTTATCACATATCCTTACTTGCCATTGTATTTCTTTCCTTCTTAATTAATTAATTAATTAATTAATCCTTCAATCTTATACGTGCACTGTTTTAACCTATGACTATA…
G1_V2_SSR_36249	c*	(AT)6(ATAG)8*	42	ATTTCTGTATAAAAACCTTTTAAGTTTTAAAATTCAAATTTCTCTTGAGTATGCCCTATCTATCGTTTTCAAATTTCAAAAGTATTTTCGTATGACGCGGTATCGTCCTGTTATTTTCTTTCGTTTCGAATATTTCCAGAACGCTTCGTGGAATTAAAATTGGTTGAACATAAATCCACCGTATTTGAGGGCCAGAGTCATATATATATATAGATAGATAGATAGATAGATAGATAGATAGGTGCCGACGTGGACTAAAAACTCTGAATCTCGTGAGTAGATTAAAAACAAAAAACGTATCGTCTTCACTAATTCTTTCTTTTAATTTTGACACGATAATCACATTCTTCATAAGGATAACGTTTCAAAACTTACATTAATTTATAGCCGATATGAATA…
G1_V2_SSR_22399	p2	(AT)6	12	GTTCTTAAAAAAAATAAAATCTTGATAAAGGATCATGACTAATAGAAAAGATTCTATTTATTAGTTTTAAGACATTATTATTTTATATAATTTTAGTAAAGCTTTGAAGTATATAAGATTAGATTTTTATTCTTGAATTAATAATAAATTACCGAATTTATTGACAACCCATTCAATTAATATCTCTATCAATTAATACATATATATATATNNNNNNNNNNNNNNNNNNNNNNNNNNNNNNNNNNNNNNNNNNNNNNNNNNNNNNNNNNNACAAATTAAATGATAAAATTTTTTATATAATATTTTGTATTAATATATTTAAAATAATAGTTGAAGTAATTAACTGTTAGTTACTTCTAAAATTTTGGTATAAAATTATTCTCAAAAATATATTCAACT…
G1_V2_SSR_62619	p2	(TA)12	24	CTGAAAGATTCGTGATCATTAATGAACAAATTATTTATTGATTATTACTAATAATTCAATGTAATATATATATATATACACACACACTTGATAATTCATTCATTAATTACCATTATTTCTTTTTGTAAATAATAAAATTTATTTGGAATTATTTGAGGTTATTTAAATAAATTGAAAATTTTTAATATCTTGAGGTGTGTATATATATATATATATATATATAAAACCACATATATACGTAGTGAATTATTTTGATATATGGTGAGATTTCGTGAAATAAAGCATTAAACGAGAAGAATCGCCTGCATGTTCCACACGGGGTTTATGGGAGGATGGACCGCGTCCCCGCATGTGTGCCAAGTGTTTCACGTGTAATATTTATTATTATAATAACCTAAA…
G1_V2_SSR_36121	p3	(ATA)6	18	ATAAGGAGAAGAAAAACAAAGTATTAGTTGATTCAAATGTCATGCAGTGTTTTTCCAATTTTATATCTCATGACTCATCTCTAATGTTCGGGTTTAAATTAAATAAAGCAGTTAGTAAAGTTGTCCAAAAGTTCGAATTAAACAATTATTAAAGCACACCTTGTCGGAAAGCAATTATCTCCCAAACACCTCTTTATATATAATAATAATAATAATAANNNNNNNNNNNNNNNNNNNNNNNNNNNNNNNNNNNNNNNNNNNNNNNNNNNNNNNNNACTGTATGCAAAATTGAAAACCCTCCAATGAATCAATCCTACGCATAATTATATTCTAAATTAAAAAGAATACGTCAAACTTTTTATTATTTTATAATAAAAGAGGAATCAAATAATTTTTCAA…
G1_V2_SSR_45473	p2	(TC)7	14	TATGTACAAATCTTCTCTCATGAACTTAAATGTTACACAGAACCCCCTCCTCCAAAAATTATCCCAGAACCCTCATCCTGAAAATTGCCCAGCACCCCATCCCGAAAGTTAATCTACCCAAAAAACATTCTCTTTCTCTCTCTCTCTCTACTAAAAAATATTTAGTGATGAAACTACGTGGTTTATCTTTGAGTAGTGTGTCATTGAAATTTCTGGTACTTCGTTAACCTCTAAATAATTATTTGGGATTTGAAAATCGGCCTTAGAAGACCAT*AACTTTTGTACCGAAAG*AACCATAATATAT*GTCTCTGTTCCGGT*AACAGAGACAGAAGCCAAGTAACATGCTT*GAATAGTGTTTTTACCGC*TAGCAAA*TTTCACTATTGTTGGTTTTT…
G1_V2_SSR_3726	c	(CTT)5ccttggtctcttcctctcaa(T)10	45	ATTCCAACTTTATTGTAAGTCATCAGCTTGCCGTTAATTAATCAAGTTACACTGTTATATTTAACATCTCAAAGAGTAAAATTATAATTTATAATTATAAATTAATAAAAATAATTAGTTTTTTTCCCTTAAAAGTTAAAATTGTAATTTAAAGTTTCAAATTAATAAAAGAATAATTTTTTTCTTCCTTAAACTATTCCTTCTTCTTCTTCTTCCTTGGTCTCTTCCTCTCAATTTTTTTTTTCTTCTTTCATCTTCTCTCTCTATTCTTTTCTTCTTGTCTCTCTATCCCTTCTCTCTCATTTAACTTGGATGATATATTATAAAGGATATTATATTCTTTTTATTGGTTAACTTAAGTCAACAATTGACTCTAACCATCAAACTTAACGAATCAAA…
G1_V2_SSR_26895	p2	(AT)6	12	TAATAATAGCGAGCAGGCAAGTAAGTGAATCTCGAACAGTCTTGATATTAATTATTATATCATATTATATTAATAATCATAATTAAATGCTTATTTGCCAAGTCACCCAAGTAACAAGTTCAGCTATAGGCCCCCCACCTTACTTTATTAATTTTAATGACGCGCCAGATCACGCGCCATCCATCAAAGGCCTTTTTACATATATATATATNNNNNNNNNNNNNNNNNNNNNNNNNNNNNNNNNNNNNNNNNNNNNNNNNNNNNNNNNNNNNNNCTCCAGGTGGGCCGTACATATTATAATACAGTGACCTGTTTGCTGACATGGCGCGTTGAGAACCGTCCAACTCAACCAAGTTGTGAAGCAACAACTGCCGAGTGAAAGAGGCGTTGTATGCCACG…
G1_V2_SSR_59159	c	(TA)7ggtaattaacattaggtccttgtaattttagaaaatatca*tatttta*ttaaacat(TA)6	83	GAGCGGGAAGAGACAGTGCATGGAGTGGTAAAGTGTTTGGGTGGCGGCTGTTGAACAAGGTGGGAGTGTATTGCTTGTCATAAGAAAAGGAGAAAAAGCAACAACATGAGAGTCCAAGAGTGTTTGGTCGATAAGAGATGGTGAGGGCGGCGGCTGCAAAATGATATAAGAAGTGTTAGTTTTAG*TGTTTTG*CCATTTATATATATATATAGGTAATTAACATTAGGTCCTTGTAATTTTAGAAAATATCA*TATTTTA*TTAAACATTATATATATATAATAATTAGATCCTTCTATTGAATAGATTATTAGATACCAATAGGTAGTTTTTTGTCATAAATTAAATTTATATTATAGTTATTTTTATTTCATCATAATATAAGGACCCATATATTA…
G1_V2_SSR_37594	p2	(TA)6	12	TTATCTTTTGTTAATTTCTAAAGCTTTTTTTTTGGAAAGAAAATGTCTATTTTTAAACATATACTACTATAAAACATATACTCACTGCACATATGAATGATGTAATAGTATTACATTATGAATCATATAGCAACAATGTAACTAAAATATTGCATCAATTTTTTTGCAAAATAAATTTAATTATAGGAAATTTAAGTTTTATATATATATANNNNNNNNNNNNNNNNNNNNNNNNNNNNNNNNNNNNNTAGTGGCCATATAAATATGTACAGAAAAATCACAGTAAATAGAGAGTTGGATTGTACAAAATATAATTTAATTAGTTAGGATCGAGTTGGGAGTTTATATTAATATTGAATATTTCCTATATTATTTTATTGTCATTGTTAACCTATATAT…
G1_V2_SSR_58275	c	(ATT)5agtagtagcaa(CAG)5(TAG)8	65	GAGCTCTTCTTCAGAAACTCCTCTTTGCTTGTTGCACAAACCACTCTCTCTCTCTCTAGATTTCTCTCTATCTCTTTTCTTTTCTTTTGTTCCAAACTATTTCCTTTCCAAAAGTGGCTGCCACCCTGTATCAAGTGTGTCTTATAATTTAAACATGCCATTAGGCAATATTTGGACTATAAAGTTGATCATCATCATCATTATTATTATTATTAGTAGTAGCAACAGCAGCAGCAGCAGTAGTAGTAGTAGTAGTAGTAGTAGTAATAGTAGTAATAGTAATAATAATAATTAAAAATAAAAAATAGTACTACATTTAGGTTAGTAGGTTAAGAGTTTAAAAGAATAAAGTGAATAAGTCAAAAAGAATAGGATTATAATTCCATTAATATATGTAAT…
G1_V2_SSR_33099	p2	(TA)7	14	TAGCTAACTAGCTAGGCACACAGTCGGAATTAATAAAATAACACTCCATGCATTTTATTTCTGATAAGATCAGAGAAAGTGGAGCAGGCAAAATAATATGCATGCGTGCGTTTATTATTACGTCTCCTTAAAAGTTCATTTTTAGCTAAATCAAATGTACTATTTCTATTGTTGGAAATGGTTTTTATTTTTATGTATGTATATATATATATAATATAACCACTAGTGGATCATATTAAAAAATTAAGTTTATGCCTTATGATGCCTTAAGCTGATACGGCATTAATTTTTGTAAAAGCTAAGTAATGATTACATCAATAACATGCATGAAATCATTATATAATATATGGATTTATTACAAAGTATGAGAGGGAGTGCATTAATCGAGGTTAATACATG…
G1_V2_SSR_24917	p5	(GGGAA)7	35	ATAAATACGTGTATGTAGGGTTTCTGTATACGTACGTACATTATAATCGTATTAAATACATATTAAGCAAGCTGGTGGTGGCGGCGGCGGCGGCGAAATAGGGAGTTGGAGACGTTTGTGATGACGTGGCAGGGAAAGTGACCAGAAACACACACGCTTAGTTTTAGATTAGACCCAACGCCATTGCTTTGCTGCGGCCGGGAAGGGAAGGGAAGGGAAGGGAAGGGAAGGGAATGTGTGTGAATAATGAAAAGGTAGTGGACCAAATGAAAAAGGAAAAATGTATTATGGATAAAATTGAGTTCCTCACCTTTATATCATGTTTGATTATATTAGGAAATTAAATATCTTATCTCAATCTTAAGTCACAATACCCATTGCCCAAAGAAAGTGACTGAC…
G1_V2_SSR_7974	p2	(AG)10	20	NNNNNNNNNNNNNNNNNNNNNNNNNNNNNNNNNNNNNNNNNNNNNNNNNNNNTGATCATCATTTCAACAATAAAAGGAAGTCAGGAATTAATTGCTTACTACCAATGTATATATATCGGGTAATATACAAGTGTTATTGTCGATGACTAGGATTCGCATACATAGGATGCAGAACTGAAGAAGTAAATTCTATATATATAGAGAGAGAGAGAGAGAGAGAATTTAAGCCAAGCCATGCAAATTAAAAATAAGCAAACAGAAATTGGAAAATGAAAACCACTAAAGGCAATTAATTAATGCAGCTACTCCTTTAAAGATTGCCTGCTGAATTCCTGCTGGCCGTCGGCAAAGTCGATCACAAAACGGTATCGAACATCATTTCTTGCGAGCCGATCCATG…
G1_V2_SSR_31580	c	(TTATTT)5tattttattttttattaaaatatataataataatagtaattctatatttataatataataatgataataaatatttttgatata(AT)8	130	TTCTGTGTGTGTGTGATTTCAGGTGAAACATATTGCAAAAGAATACAAAATTTAGTCAGTGTAAGTGTTGTGAGTTGGTTTTCTTTTCTTTTAAAACAAAAAAAATTTGGACCAAAGCAAATCGCCCAAAGTGTCAGATTGCATGGCACAGGTGCGCAAGATCATGGTGTGCCCGCACCATGCATATTGTCCCCTTGAGTTATTTTTATTTTTATTTTTATTTTTATTTTATTTTATTTTTTATTAAAATATATAATAATAATAGTAATTCTATATTTATAATATAATAATGATAATAAATATTTTTGATATAATATATATATATATATNNNNNNNNNNNNNNNNNNNNNNNNNNNNNNNNNNNNNNNNNNNNNNNNNNNNNNNNNNNNNNNNNNNNNN…
G1_V2_SSR_19563	p2	(AT)10	20	AGGGTAGTGTGGGTTTGAAGGAAATCAAATAGTTCGCTTATTGGTTAATTGGCCGCCAATTGGTTTTGGTCTCCAATTCTGTCTTGACCAATTTATATACATTTTTTTATTTCTTTAATACGTGAAAAGGTGGAAACTTTTATATCCTTATATAAATAATAATTCAAAATTTTATATCATTAAACTGATTCTTTGTACCATATATATATATATATATATANNNNNNNNNNNNNNNNNNNNNNNNNNNNNNNNNNNNNNNNNTGACTTGATTTAGACGGGAATAAAGTTGGTCGCTGGTCTTGCTTTCATACTGAAAGCTGAGTCAATTCAATTCACTTTATCAAGTGCCAATTTTTTATTGGCTACCTATACCCTAATTGAGGCCCTACGTATATATTT…
G1_V2_SSR_41019	p2	(AT)11	22	TATATGTATATTAAAATGTTTGAGTGTATTTATGACAA*TTTAGAGTATATTTGACGCTATTATGTCATCTT*CAAATAAGAGATTTGAGATATATTGGACG*TTTTTTAACTATTTAAATTTAAATAATAAT*AAATAAT*AATAATAA*TTTAATATTTTATACTTGAAATTTTTTTCGTTCTTTTAAAATCTTTTAATATATATATATATATATATATGTATACCGTAGTCAAAGTATTGCTGGTAGGGTCCCTATTTTTCTGTTATCATCTGGAAGGAACTGCAGACAAATCAAAAGGGACGGTGCTTCGGACGTGGTTATTACATTAGTCAAACTATTGTTTGATGGGTTCGGTGGACTAAAAAAATTGATACTCAAATCCTTGG*AAAATATT…
G1_V2_SSR_63337	p2	(AT)6	12	CTAAAACATTATTCTTTTTTGTTATTGACTTGTTAATAATACAGCATCGTCCAAAATTCTTTAGGATATATAACATAAATTAGAAGTCCCATACAAAAACGATATCTACTCTCACAAAATTATTAAAAAGAAAGTCATTTTGAATAACAAAAAGTTCTTAAACATACCCATTTTTATACTTATCTTTTATTTGTAAAAAATATATATATATAATTAATTAAAGTATGATCATCGATTTATACTAAAGTGTGTAAAAATTTAATAATGTGATTATAATAAAAATGTGTTCAGATTATATTAAAGGTAAAACAAATTCATTCTCAATTGTAGTAGGACAACAATTTTGAATCCCAAAAATGTTGTATATAATTTTTTTTTTTTTNNNNNNNNNNNNNNNNN…
G1_V2_SSR_64890	p2	(AT)8	16	ATTTATTTTAGTTTTAAAATATAATGATTAGAGTATGAGTGGTTGATTTGTTGATAAATTTTAATTAGTAAATAAAAATAAAATTATTATTTTAATTTTCAACAATTGTAATTTAACTAGCACCTTATTTTAAAACAAATAATCTTAGAAGAATTTGGCCTAATCACTTCCATATATACATACATACATAAATACATACATATATATATATATATNNNNNNNNNNNNNNNNNNNNNNNNNNNNNNNNNNNNNNNNNNNTATACTAGTTTAAAAATTCTTTTTTTTTAACTATTAATGAGTTGAAAATCTAAGTAGATCGTACATATACTATTTAATATTAAAAATTTTAGATGGTTTATACTGACTCAACATGAATTATTTTCGTATAACATTTTGAAA…
G1_V2_SSR_8521	p2	(CA)15	30	TAACAATAATGAAGTAATTTCGTGCGTTTGAAGCGAAGCTAAAGAGGAAAAGAGAGAAGAGGAGTACATGTGAGGAAAAGAAAATAATGCACACGCACGTTTGCTTTTTTTGAAGTCTTTCTTTACTTTTATTTTTCATCATTATTTTAATTTAAATTTTTAATGTTTAATAAATCTAATCACCCTTTTTCTCTTTCTCCACACACACACACACACACACACACACACANNNNNNNNNNNNNNNNNNNNNNNNNNNNCCTAATCCTTTCTTAATTAATTAATTAATCAAATTAATCAAATCTGCTTTTTCTTCTTGATTTGTTTCAAGAGAGTTTCATAAAGTTTAGGAGAAGAGCCACGAGTGTAATCATTGCCCAAATAAGCACTTCCCACTTAGAA…
G1_V2_SSR_51755	c	(TAAT)5tttaggagggaaggaaaacagaatgtcagcagcggaagat(GAAGG)7	95	TAATAATTAAATCACGTGATTTCTAAAATAATTTTCTCCTTAATATTCAATCCTATATATCATGATTGATGAG*TAACTCTCAAATCGTAGATAAAATCAACTCCCGTGAGCAAAAAATCCGGCAGTCAAATCTGTGTTACCTCAATATTATAAAATAATTTTATTATTTTTGTTAAGAAAAAGAAGAAACATCAACCCTAATTAATTAATTAATTAATTTTAGGAGGGAAGGAAAACAGAATGTCAGCAGCGGAAGATGAAGGGAAGGGAAGGGAAGGGAAGGGAAGGGAAGGTTTGTTCGGATGGTTTGACAATTTGAAGGAGTCAAACCCACCCACGTGGCAGTAGCTAGTGGGGCCCATCATTTAAGGCATGGGTGTCCAGCTTTTTAAGGTCAA…
G1_V2_SSR_62912	c	(T)11atttatttttttatttttaagacacaaattttttattgtcggagttg(TA)8	74	CGTACGAGTACTTTTCTTTTATTATTTTACTGCTCTGTTGCATGCTTAACTTTAAAGTTTGAAATAGTGGTTTCTACTTTGTATATTGGAAGGAAGGGATATTATAAATAAAGGAATAATTAATGTTGTCCTAATATTTTGTTCTTCTCCTTTACTGCAATGGTGGCCGTTTTTCTCCTTAATTTTCTTTGTTTGTTTGTTTTTTTTTTTATTTATTTTTTTATTTTTAAGACACAAATTTTTTATTGTCGGAGTTGTATATATATATATATATNNNNNNNNNNNNNNNNNNNNNNNNNNNNNNNNNNNNNNNNNNNNNNNNNNNNNNNNTATGTGCGTGAGAGAGAGACAGAGATAATAATTACCGTTGCCTGGTCTTGATGAAAAAGAGAAGAGACA…
G1_V2_SSR_14852	p2	(AT)8	16	TATTAATTCTAACAAAATAGAATTTTGAAGATTGGTGCAATTAAAACTTAATTACTATTTGTTTGAAACATTTTAATTGAAAAACAATTAATTTGGGATTTATAATCAATTATTACAATGTTTGACTGCATATTTTTTAAATAAAGAATAGTAAAATTATTCCATATAATTTTTGGATATGTTATGAATGTATATATAAATATATATATATATATNNNNNNNNNNNNNNNNNNNNNNNNNNNNNNNNNNNNNNNNNNNNNNNNNAATTAAAGTATTTTATCCTTTTCTGATACTGCCTGTTTTCTATATTTGCATGAAGTATATTTTGATAATCAATTTTACATGTATTAATTAACAATTAATAATTAAGATGTAAATGAAAATGTCATATGAGATTAC…
G1_V2_SSR_8731	p2	(AT)10	20	CAAATTACAAAAAGTGTAGAAGACATACGTGCATATTCATTCATGGTATTCAAATCTTTAATTAGCTTCTTTTTGATAAAGTCAAATGTATATAACAAGTTTGAAGTGAGGAGCCTATGAGAAAGCTATATAAGAAAAGAATAATTAATAAGTTTGTCCCATCCTCTTATTAACATGTAATATTGCTGGCCTTTCAAAAATATATATATATATATATATANNNNNNNNNNNNNNNNNNNNNNNNNNNNNNNACTAGTTGATAATTAAAAATTTGATCAAGCAAAAATGATTGAATAAATTTTTACCCAACTTCTTTTTTCCTCTTTTCATACTTTCACTGATTTTGAAGACCTATTTAAAGAGCAAGCATAATTTGCTATTAATGTCTATTATTCATGA…
G1_V2_SSR_11531	p4	(AAAT)6	24	ATTGAAATTTGGACCATGTTAAATTAAAATAATTTAAATAGACCACTAATGTTCAAAAAGAAAGCGACTAGAGAGAGAAAAGGACACATATCCCTTTAATTATATTGCTTTAAAAAACAAGACCTGATCTCTTAGTTTAATATGCAAATTAAAATTAAAAAAAGATATAATTAAAAGGATATTATAATAATTATAACAAAAATAAATAAATAAATAAATAAATTATTCAAATTGACAAAATTTCTTACCGTAATGTTTTTTAAATTGTTAAGAGTAAAATATAATTTTAACTAAAGCCATGTTTGGGAGCGTTGGGCTCTTTGATGTTTAGTAACTAATTTTTCATGACTTGTTTCCACAGTTAGCAAAAAACAGCTTAATCCCTAAAAAATTTGTAAA…
G1_V2_SSR_29463	p2	(TA)7	14	TGGCATGATGCAACACATTGCTTGCTAAACCAAACCTAATCCGACCCTTTCAATTTTCTCTTGCAAGAATATTGGGATGTCGGTTTTCTGGAAGGCCAGATACTGCATCATCGGCTAGTCAATCCTATTATATATTTATTATCATTATCATTAGAGTATGGTATCGGTATTAGTACCCTTTATGATGCATATATATATTTATATATATATATAAACATTATTGATATCTAACTACTAGTTTTTAAAATAAAATTTAATGTCAACTGGAAAACTATATATGAAAGGAATTAAGGAAGTTAGATAAAACGGAGCTCTCAACGATGACGTTTTAACACCAGTTTCTATCTGAGATTCACGCATGAGTTAAGACTGCCCACGGGCCCCTGCAAACGCTATACA…
G1_V2_SSR_57015	c	(AGA)5atatcaaagggttttggttggtgggtctagtgttattttttttggtagtgagtttttgta(T)10	85	GCACGCGCCACATGGTCCAGTACCACCGCCACTGCTGCTACTCCCACCGCCACTACCGCCGCTGCTGCTAGGGTTTGCACTCATGATTATGGTTATTACTATTACTATTCGTTTAAAATTCTGTTCTCTTTCTCTTAATCTATATAATACTGATCACATGATTAGCTAGGGTTTGAGGAGCTAAAGAAAAGAAGAGAAGAGAAGAAGAAGAAGAATATCAAAGGGTTTTGGTTGGTGGGTCTAGTGTTATTTTTTTTGGTAGTGAGTTTTTGTATTTTTTTTTTAATGGGGGATTTAAAACGCTAGATGAAGTCTTTAAAGCCACGCGAGAGAGCAAACCCCCATTTAGCTGCTTGCGTGAAGCAAACATGCGATAAGCCTAGCTATTCTCAACTGCCC…
G1_V2_SSR_30657	c	(T)11nnnnnnnnnnnnnnnnnnnnnnnnnnnnnnnnnnnnnnnnnnnnnnnnnnnnnnnnnnnnnnnntt(AC)6	89	GTTCTCTTCATATCAGATCTGGAGTTGATTCCTCTCCTGTAAGTACTTCCTCTCCCATGCGATTGCTTGCTTATGAAATATTAATATTCATGTCCTTGATTAACTTTCTATATTAAGATTTTATTAATTTGATGACTATTTTCTTGCTTCAAATTTCTCTTCTTCAATTTATATGTGTTTTTCTATTTTCAGTTTTTTCTTTTTTTTTTTNNNNNNNNNNNNNNNNNNNNNNNNNNNNNNNNNNNNNNNNNNNNNNNNNNNNNNNNNNNNNNNNTTACACACACACACATATATATTTATATATATAAATAATGTCAGTGGTGGTTAAAATTGTATTAATCTAAAAAAATGTAAAAGAACATGGCAGCTGTTGAGTTCTTATACGTTAAAGTTAATTAA…
G1_V2_SSR_48042	c	(TA)6atttagtgagtaatgagctctcttttattaattagtaaa(AT)9	69	TAAAGTGTATATTAAAAGATAACATCTATATACATAGATTATTAATAAGTAAGACATTAAAAAAATATGTACAACTATCAAAATTATTTTATTGATGGCTGCTTTCAAACTTTGTATCAAATCAGTCAAATTTGGCACCAAAAATTCTTATTAGAAGAAAATTTGGACCAAACATATTGCATTCAAATATGTACACACGTATATATATATAATTTAGTGAGTAATGAGCTCTCTTTTATTAATTAGTAAAATATATATATATATATATAAATTTTAATTATATTCACAAGATATTACCAATCAAGTTACATATATCGTTCTATAATTAAGTGAATCATTGTG*CTTTATCTTATAAAATATAAGTGTACATATGATATAATTATGTAATC
G1_V2_SSR_5411	p2	(TC)12	24	AAAGTGTGATTATAGAATAGTTCAAAAATAACTTAAAGGTATTGGAGAGTGGTTCTCTCAATAAATCACTCTTTGTAGCTCCATTGATTGAACATCAAAATGTCACGTGAAAAGATTAACAATTATGACCATATGACCATTAATAGAGAAAAATAAAAAATAAAAAATAGCCGGTGATGTGAACATATTGTCTTCCATATCTCTCTCTCTCTCTCTCTCTCTCTNNNNNNNNNNNNNNNNNNNNNNNNNNNNNNNNNNNNNNNGATATACAATCTACTAATAGCAGATCTAAAATCTATCTGCTATCAGCAATCAAGAGTCATATTGATACGAGATCAAAAATCTACTCGAAATCAAAGTCATGCTATAAGGATAAACGTACATTATTGAAAATTTAGC…
G1_V2_SSR_31413	c	(CA)7ctacatgcatgcactgatacgtaaaatattaattatattattcaaatgaaattcatgcaatggtgtttcataat(ATTA)6	112	TCTTCTGATCATCTCATTGGACAATATTAATTTTAATTGTGATTATCATACACTATAAAATTGTCTTTCTAAAGTAGAAATTTTAGAAAAATTAAAAAGTTAGATACTACATGCAGCGCTATACTTTATATTATCTTATGGTATTCATTAATTAAAGAAATATTTATAATGAGGTATATATCGTCTTTATATATATGTGCACACACACACACACTACATGCATGCACTGATACGTAAAATATTAATTATATTATTCAAATGAAATTCATGCAATGGTGTTTCATAATATTAATTAATTAATTAATTAATTAANNNNNNNNNNNNNNNNNNNNNNNNNNNNNNNNNNNNNNCACATTCTAAATTTCAATGGGTGCCCCTAGATTAGATTAGAATATGCTG…
G1_V2_SSR_36295	p2	(AT)9	18	ATCAGTAAGATTCCTTTGTAATTATTCTCGGATTGAAAATATATTCATTGAGGGCTCCAGGCTGCTTGATTCCAAGGTCTAATCCACCAATTGGAGTCGTAATTATTTCAACTCGGAAATTAAAAAATTCATGAAAATTTCAGAAACTCCGATAGAAAGTTGCATAACGACATGAAATTCAGTTATGTTGAATGATTGCATATATATATATATATATNNNNNNNNNNNNNNNNNNNNNNNNNNNNNNNNNNNTCAGGATTTTGTTACCATGTGAAAAGGAGATTTTCATTTAGCAGTTTTCAGGAAACATAAAATTTATAACTATTTTATAGAATGTAAAATTTGTATGCCTTAACTTTTATGTGGTCTGTAATTGTCACCCTAATTGAAAAATATGAA…
G1_V2_SSR_4028	p2	(AT)8	16	TAGCAATTGGCATCAACCGTGCTGCCGCAGACTACGACGTACGTAAATTTCTCTCTGTCTCCCTACACAAATTCAATTATATTCTTTCCTTTACAAATTCATATCTACATTATGAAAATGCAAATCTAATTGGTTTAAATAAGCTTCAAATGAGCGTTATTTATATACAGATTAATGTTAATTTGCACCAAATTCATACATATATATATATATATTTAATTCCACATGCACAGTTTATTTAAAATTTGGGACATATATTTTCTTTCAGTGGCATGGCGCAACTAAGGGACATGAAGCAAAACAAAACTGGCTGAACCATGGAGGAGATTTATACAACAGAAGATACGCAAGTAAAGAGACAAAGATCAGCCCCAAAACAGTTTCCAAGCTTCATCTGAA…
G1_V2_SSR_14854	c	(AC)6(AT)7	26	TAATCTTTTTTATAACACTGAATAAAAGTTTGTCTTTATTATTAATTTATTTATTCTCCTTATATTTTATTATTTATTTTGTAGATTTCTTCAACTTACAGATTGTTGTACAATTTCTGAGAATGCAACCTTAATTTAGTCCATTGAGCTTCAACTTCTCTGCTTCTACTCCCATGAAGATAAAATCATTTTCCTAATAACACACACACACATATATATATATATGTATATATATAAAACTTTTTGCTTGGTTACCTATTTTAGTTGTTTAAATGTTATGCTCTGATAGGATGGCAGCAGAGTGTAGAGATAGTAATTGATTTCGATGGTAGCGACTGAAAATTAATCCACATAAGCAATCAACTAATTATACGGCTAGTGGGGAAGCTAATAATTAAA…
G1_V2_SSR_30658	p2	(AT)7	14	TAATATTCCTTCAAATTGCAACATCAGCTCTGTCACATGAAATTGATTGATGCGAGGAGCGATATTGTTCCATTTTGTTACGGCATGACATGAATGTATATATGCTTTAGTTGAATTAATCAATTCCTTCGTCTCGTATATATGAAGTGACTTACTATAACTCCCTATATAAGGTCACGGGTGGATCTTGTTGCTCCTCATATATATATATATTTTTAATGAATTATTATCTTATTTAATTTCCATTTTGTGCGGCTATTAGAAATTAATTCATTCTCTCAATATATAATGGAATTAATTTTTCACTAACTTTTGACAATACATTATTCCACATATATATATATATATATNNNNNNNNNNNNNNNNNNNNNNNNNNNNNNNNNNNNNNTGAAATTCAAT…
G1_V2_SSR_34277	p3	(TTA)13	39	TTCTTCTATAAGCTATGCTTTACCGACCTCAACAATACACAGTTTTGAACAAAATAATATTTATTTTATATATTATATGTAACATGTGCTAAGTATTATTTCTCTTTTGGTTTTAAAAATTCAAATTTTTAAAAAAAAATCGTGTACAAAATCATTAGAAAATACAAATATTTGGGTACTTTTTTAGATTTAAATGAATTTATTATTATTATTATTATTATTATTATTATTATTATTATNNNNNNNNNNNNNNNNNNNNNNNNNNNNNNNNNNNNNNNNNNNNNNNNNNNNNNNNNNNNNNNNNAATATTATATTATTGTTATATTTGATTTATTTATTATTATTTTCCGAAAATGTAGGCCTTATGCTGAAAAATCTAGTGTAAATGTTACTAATAAG…
G1_V2_SSR_4447	p2	(AT)9	18	TTTTTTTTTTCTGAAAAAACGATGGGTTAATGCTTAAATATAATTTTTTTTATTACAATACCATATTTCTAAATTGCATAGCAAGTGAAACGAAATTGAAAGAGTCTAAATAATTTAATTTAACAAAAAATAATGTCATTTTTAATAATGTTGAATTATTTTGATCATTGAATCATTTTAATCTAGATTACATGTATGCATATATATATATATATATNNNNNNNNNNNNNNNNNNNNNNNNNNNNNNNNNNNNNNNNNNNNAAATCGGTCCTAACTCCCATATGGTGACCATGTGCAAAGTATATTTACTTTCTACAATTAATTAATTAAAAATTAAGCTATATATTATAACTTAAACCATGCTACCAATAACCCATTAAAAAATAAATTATTAAAATT…
G1_V2_SSR_42406	c	(GT)7ttgaaatgtgaaagtgaaaatatggaggttttgtattttagtcattgaaggaa*ttttggtcagaag(T)11	92	AGTTATTCATTTTTACATATTATCGTCTAAAATCAATT*AAAAAAAAAACAAACAAACAAACTATCGTCTTCATTGTCATATAGCTTGCCGT*AAAATGCTACCATCCTTCAAACATCACTTTCGCCTTCAACACTCCGTCGATTGCCGTTGCCACCATTGATTCAAGAATTTAGTAATTAAGGGTTTTGCAATTTTAGGTGTGTGTGTGTGTTTGAAATGTGAAAGTGAAAATATGGAGGTTTTGTATTTTAGTCATTGAAGGAA*TTTTGGTCAGAAGTTTTTTTTTTTCTTAGCTAATTTG*ATAAAAAATTTTT*AAACAGGATTATTTATGTAAATTGGGTGAAAATTAGGTTATTATGAAAAGTTTTTCAAACTCG*TTTAACATGTTACACT…
G1_V2_SSR_63591	p2	(TA)7	14	TTACATGTAAAAACTAACGGTCAGTCGATTCATTTGGAATCGCTAACAAAATTGAATACTTCCAAATTCCATGCAATCCTGTTTAAATAATTGTTAAAGGGCTTTATCCATCCTTTCAATTCTTTGAAAAGAAGGATTCAAAGTTGATTAAATCAAGATAGAATAGTACTACATACATACATTATTTTTATAGACTAATTATATATATATATACATACAAATTAAAGTGGTATGATATGATGGAAAGATTTTTATCATTTTTTCTATACTTACTTATTGTGTTTTTTACATTTGTAACTATCTAATCGTAATATCATATCATATTATCCTAGATAATTAATAATAATATATCTGCCCTTTTCTAAAAGAAAATTAACTTTACTTCCTTTACTGTTATCT…
G1_V2_SSR_65231	p2	(CT)7	14	CAGATATCAACCACGGTATGACCACCTTGACCAAGGGTGAGAACCCTTAGCATGGCCACCTTAGTATAGACGGTAAACTTGGGCTAGACATTAAATATTAATAATACTTCTCCAAATATCAAATATCCCATCTTTGATCAATATTCTGTTTGTATTATTTTTATTATCCAACTATACATGGGAAAAAAAATAAATTACGCTCTCTCTCTCTCTATATATATTATTCAAAATATATTTCATCCTTTTCATTTTAGCTCATATATATGTAAGATATACAACTAAATAGAGCTAAACTCTAAATTTTGTGTAAAATAATATGGGCACCATGCTGGGATATAGGGTTATCCTGCAAGCAGGAGCGTGGATATAAGTTGGAGAAAGTTGAAAAGAAAAATTTTG…
G1_V2_SSR_36087	p2	(AT)10	20	TTGTCATGCACTCTCAATCTCAATCTCAAGTGTGTTGACTTCACTCTCTCTCTCTCTCTCGCCCTTTTCATTTGCTAAGTGGAGAACAAAATTATTAGGGTTTGAAGCTGAGGCCAACCCATGTGATGTGAGAGTGAGAGAGAGGCCTAAATAATTCAATCCCCCTCTTAAGTCAAGTTAATAGTACACTTAGACCTTCATATATATATATATATATATNNNNNNNNNNNNNNNNNNNNNNNNNNNNNNNNNNNNNNNNNNNNNNNNNNNNATTCAATGATCTACTTGCGATCTTTAGCTTCTGAGTGCCACCCATCAATTATATTTCTCCATTTGGCCTTGTAAAGTTGGGTGACTAATTCGGTGCTATATCATTGGAGTGTGTATCTCACTAGCTTT…
G1_V2_SSR_35452	p2	(AT)8	16	ATAGTGTTTATACTTTTAAACTAATAACATAAAAGATAATAGTTTAATATGAAACAAAATCAAATACTTTTAAAATTTCTATTGTTTACTGTTTTGTTAAAATGTGAACCCCATTTAAAGACAAGTCTCCCTGATCATCTCCAACAAAATGTGACTAAAAACAGTAGTTTAATAATCTTACTTAAAGAGATGTAAGTAAATATATATATATATATNNNNNNNNNNNNNNNNNNNNNNNNNNNNNNNNNNNNNNNNNNNNNNNNNNNNNNNCATTCATTTCTCTAAGTTCCAACCAGCTTATTATATGGACCTTGATTCTCCTTTTTTTATTCATCAACCCAAAATGATGTGTTATAACCTAGCTACCATAATCATGATTTTATCGGTAATAATTGAGTG…
G1_V2_SSR_35243	p2	(AT)11	22	AGCCACAGAAATAAAATCAATAAATTTGAGAAAAATATATATATATCACGAGGAGAGGAACTGATCACAGAAGCAAAGACTAGCTTTTATCAGGATCTAAAATGTTCTTTCTTGTTAGGTATATATATATGTACACATGGAGAAACTGGACGCAAGCAACAGAACTTCTTATATATAATTAAAGACGTTGGTGGGAAGGATATATATATATATATATATATNNNNNNNNNNNNNNNNNNNNNNNNNNNNNNNNNNNNNNNNNNNNNNAAAAAGCAGATCATCATCATGTATTCCATTAAACAATAGCCAGCTCTCAGATCAGATACCGCAAGAACTATGTTGCAAAAGTTGCAGGGGATGTAGCAGAGTTGCTCAGCCGCAACATCGATGCAGCTCGAC…
G1_V2_SSR_27070	p2	(TA)8	16	ATTTTATATGACTTATATTTTTTCTTCTTAAAATATTGAAAATTCGACAATATTATGAAATTATTAGATCAATCCCACAATACGATTATTAATTAATTATCCAAATTCAATTAATTATGCAAATTCATGAATTGAATGCAAGTCTATTGTATATATGGTATTAAGCAAATTAAAGTGATGATAATTGATAATGCTCAATTATATATATATATATATNNNNNNNNNNNNNNNNNNNNNNNNNNNNNNNNNNNNNNNNNNNNNNTTATATTGTACATTAAAATAATAGTCGTTTGCTCATTATTAATTAGATTTCAAGGGCTTTATCTATTATAGTACAGAATTTAGAGTCACATTCCTTCCTAATCAGTGTCTTGTGTTGGAAATATTGGTATTTGATGG…
G1_V2_SSR_20926	p2	(AT)6	12	CCACCAAGGAGAAAAAAAGAAAACCCTTTTAATGTCCAAAGTGTGAAAAAATAAAAAATTATAGCTTTAGATCTTCAACATCACAAGTCTCTTTAAATAATATTTTTGCCGTTACAATTTATACTGATCGATAGGAGAACTTTTTATTTTATTATTATTAAATAAAAAATTATTTTTTCTGTTGCAAAAGATGAAATGAATATATATATATGATCAAGAGCTATTGAGTGATGACATCTTGCAATGCATCGAGATTGATCGATCGTGTATAAACAGTTGGACATATATCCTCTATTCATTATACACTTTGCACAATATTCACCACTATTAATTTAAATTAGAAGAAGATCTCTTGAAATATATATATATAAAAGAGAGCACTAAACATCATAATTCTAC…
G1_V2_SSR_18305	p2	(AT)10	20	CATTAAATAATTTTTGTTGTATTTTTATAATTTTGTTTTTTTATAAAATGTAAGGAAAGTGGGCCAAGCCCAAATACATATATATATATATATATATTTTATAATTTGTTGACTCTCCAATGTCTTAAACAAACAAACCATTCATCAACTGGCTTCTAAAGCTTCGATTCATTGTTCATTGCTCGTGGTGAACTTTCTCATATATATATATATATATATTTTTTTGTTTATTTTATTTTTTTAATGATGAGGACTAATGACTAAAGCGTAGTGGATGGTATGGACGCAAACTCAAGCCCAAATTGTGCGCACGTTTATTGAGCTGATTTTAGACCAATTTCGCTTTTTATTTTTAATTTAATTTTTTTATATTACGCAGAATATATTTAGTCTTCTTTT…
G1_V2_SSR_27448	p2	(AT)9	18	TAACATTGATCACGTCCTGTTTTTAATAAGAATTAATATAAGAAGCATACTTTAAACAAAATCAATTTAAAAAATACTAAGAGAAAGGGCGAGAAAAAAGGTATATATATACCAGAAGCAAGTAACAGAAGAACTATCAAGCAAGCCAATTTATGTTGGGATTTATTTTTCTCCATTTTTCAAGTTGTTACTATTTGAAATATATATATATATATATNNNNNNNNNNNNNNNNNNNNNNNNNNNNNNNNNNNNNNNNNNNNNNNNNNNNNNNNNNNNNTTTTCTGGGTCAAATTTAAGTTAATAGATAAATTAAGAACAAGAAAACACATATAATTCTTTGCGTTTCTAACAAATTTGGAGTCATATATTTAGTGTGCAAGCTCTTGCATATTTTATGA…
G1_V2_SSR_25301	p2	(TC)8	16	ATTGGATACGAGAAGCTGGCTTTAATAAACAAATGATGTGATAGATTATTATTTAATTAAATAATAATTTAGGTAATCAATAATTATTTATAGGGGTCTTAATAAGCGTAAGCCTAAACGCCAAATCCCATTCACCTATAAAATAGAAGAGGGGATTTTATTGTGAAAACAAGGTGCTTTGCTTGTCGGAAAGTATCCATCTCTCTCTCTCTCTCGCTCTTCATATTTTTCTTTTCTCTTTATTTACTAATTTTCCTCCGCCATTAGCAACTATTTATTCATGCGTGTGGGTCCCACTCCCTTATAGCTAAATATCAGCCTCCCGTACTATTTCAGTTGACGGCGATTTTTCTAACTTATCTCTTTTCTATTCGCTTCACTCTCTCTCTCTCTCTCTCC…
G1_V2_SSR_32888	p2	(AT)11	22	GGTTATTCACATATAGATGATAGCTAGATTTATTAATTTTTTTTTTTTAAAANNNNNNNNNNNNNNNNNNNNNNNNNNNNNNNNNNNNNNNTCCTTATTATCGTGATTGAGTGCAATGAGTGAGTGAGAAATTGAAGAGTGTTACGTGGTAGTGTTGGTGTAAAGTAGTTGATGAGTTATATATATCACAGAATCGCTGATATATATATATATATATATATGGAGCTACCTTGATGCTGAGTTTTAGTATATGTGCTAATGATGAAATGTGTAACAGCAGATTGGCCTAGCTTAATTGCATAACTAAGGAAATCAGAAACTGATGATCATTACAGCTAATTCATTATCACCTTTTGTGGATATGAAGGCTAGCTTAATTTGGCAGGTAAACTCAATAAC…
G1_V2_SSR_15363	p2	(GA)7	14	GATCTGGTAAGCATCTGCAGCAGGTTTTCAATGAAGGTCCCTTGTGTTTTCCACTAACATGCATGTATCTAGATTCCCTGCTGCTTTCTTATATTTTGATTTGACTAAGCCTTTACCCTTGAATTAAAGCACACCACATTCATTTTTCTTTTAATTTAATTAATTGATCAGACAATTCATTTATGAAATAGTTATGGGGGAGAGAGAGAGAGAGNNNNNNNNNNNNNNNNNNNNNNNNNNNNNNNNNNNNNNNNNNNCAATTTGCAAACCATTATTGTCACCGCACACTTCCAGCTTTCACTTTCTTCAGTTTCTTCTTCCCCTCTTTTAATCTTCGTCTTAATTAACTTCTCTTCTGCAATTAAGAGCTTAAAACGCTTTCCAATAACAATTAGTGAT…
G1_V2_SSR_22736	c	(CA)6tacatatatacatatatac(AT)10	51	TCATTAAATTTTATTAAAAAATAGGACAGACAACTAAGGCTTAAAATTAAAAGAAAACGAAGAACAGAAAAGGCCTCGCACCCCACCGCCGCACTATTCTCATCCCTGCCTCAAAACAAAGGCTTAAGTCTTCTCAAGCTGAACTGCCTAAAAGTTTTGAAAATACAGCGCACAGGGCGGCGCCAAAAAGCCTTGATTTCACACACACACATACATATATACATATATACATATATATATATATATATATACATATCCTTCCTTAAAATCCCCGCCGCTGACTTGCTGTGTCAATTTCTTAATTACACACTAATGGAAAATAATTTATTGAGTACTTTTAGCAGTTGCATAATAAATATCCACAGTAAAAGCCTTAACTATGGTTGAGTAGACAGATAG…
G1_V2_SSR_28583	p3	(CAT)8	24	GTCAACACATCTATTTGCTTTCAGTAACTGGCAGGTATACGCCTTCAGCAGCCAACCACACATTATCTGCACGCTTTTCTCTTACACAGCAAACCTAATAAAGTTCAGACATAGTTAACTTGAGAACTGAAAAGCAAAATTCTACATATCAACTGTCATAATTAGCTACATTGAGTCAATATTTGAATAAGTCGGATTGCATCATCATCATCATCATCATCATGATTATGATTATGATTATGATTATTATGATTATGATTATGATTATGATTATTATGATTATGATTATTATTATGATTATTATTTCTCTCTCACCTCTTGCTGTCCGCCTGCTATCCGCTGGTATTTCTTGTCATGACTATGTAGAAAGGCACCTGTGTCAACATGTTGAAACCTTAT…
G1_V2_SSR_45143	c	(AT)8taaagtaattgtttctaattttgtatagaaagtaacataacatttatgtatttatttatggtgagatagtatcaaaataatttcttgaaagtctaag(AT)8	129	ATAGAAGAAAACATTTCTAGCTCATTCGAGTAGTTGATATCTTGGGTGAGTTTCTAATATTTCATGAACTTTTTAAATTATATTTAATTAATTTTGGTAATATTTAGTATTATCTCTGAGTTTTATATTTTATTACACAAACATATTGTTTACTAAATTGTGTTAATGAGTTCTTGTGCTTAATTTTCTTCAAATTATAATATATATATATATATTAAAGTAATTGTTTCTAATTTTGTATAGAAAGTAACATAACATTTATGTATTTATTTATGGTGAGATAGTATCAAAATAATTTCTTGAAAGTCTAAGATATATATATATATATANNNNNNNNNNNNNNNNNNNNNNNNNNNNNNNNNNNNNNNNNNNNNNNNNNAAGAAAAAAACTTATAAGTA…
G1_V2_SSR_11536	p3	(AAC)8	24	ATTTTTAATTTTTGTGGCCATTGACTACATGAATTAGTAAGAACATTGAATAAAAAGAAGAAGCTTTTTTGGGTTTTTGCGAAAAAAAAGAAAGAGAAAATTATAGACAAGACAAGGCACCTACTTGTACTCTGTTTGTTACCACAGCTTTTGTCTTCCTTTTGCTTAAATATGAAGCTGCCAATCAAAAAAGAGAAAAAACAACAACAACAACAACAACAACTCATTGTTCAGACAATTAAGCAAACATTATCACATGATTGTCATTCCCTTCCTGCACTCGAATGAAATGACTTTTAATCTTTATTTATTTCATTTCTCAATTCTTATGTCAATAATTTAACAATAAAAAGGTTAAAAATTATAGCAAAAAAGTCAAAATAAAGCAACAAATGTTTA…
G1_V2_SSR_5415	c*	(AT)7(TATG)12*	59	CTAACCAAATTTGAAGGAAGTTTCTCGCAATGAAATTGTTATACAGTTACCACTTGCTTTCCAGTTTCGTCGCGAATTCCTGAAGCACCAGATGCATAATTTACACCTTTGAGGATTTCAGGGCCGCTTGCAGTGGCAAAGGGTTGAATGAGGCTGTCATAACCCAGACGTTCAGCTGTAACCAAAAGCCATTTTTATAATATATATATATATGTATGTATGTATGTATGTATGTATGTATGTATGTATGTATGTATGTATTTATGTATAAAATTTCTTCAATGAAATATGAGATAAACTTTACTATAATTAATAACATTACACCAACCATACCAATAATTTTATTTATTCTTTAAGCATCTGAAATCTAATATGCACAGCCATTGGTAGGCAATATGA…
G1_V2_SSR_37513	c	(T)10cccgaataaacaataaaagcacgtagcgacagttgtgtgacttcgtgttacatattctaggcttttacatggcctccattaataattgtttactg(AT)8	121	GTATAGGTGTGCAAGTTATAATGACAGTGAGAATAGATTAATTTAATTTTTTGACACCATATTTTCTAAGTGTTCGGCATTTATTGGATAATGGAAAATTGTTTTGTTTACACCTGCTTAGAATTTTTTTGCAATCAAGTGCGCCCTAATTTCAAAGACAAAATTTTTCTAGTGTTCACATTCAAACTCATAGCGACAGTTTTTTTTTTCCCGAATAAACAATAAAAGCACGTAGCGACAGTTGTGTGACTTCGTGTTACATATTCTAGGCTTTTACATGGCCTCCATTAATAATTGTTTACTGATATATATATATATATANNNNNNNNNNNTAGTCTTCAATATAAATATATTGGCAGTACTATATACTTCACTTTTAAGAGTCACTGACCACATATA…
G1_V2_SSR_57399	p2	(AT)8	16	TAAAAATGTAAATTGATCCCTAAAAAATCTCAACAGGAAGAGTAAGAAGGAAAAAAAAATAATTTATGTATATATCATTAATGATCTTGTATATATTTTGTTGATTATTAATAAATATACGCAACCCAACAAAAATAACTTACTTAAAATATAAAGATTTGATTATAAAAATTAGAATTTTAAATATTAATTAATCCCAATATATATATATATATNNNNNNNNNNNNNNNNNNNNNNNNNNNNNNNNNNNNNNNNNNNNNNNNNNNNNAAGGCAGAAGTCACATTGTATGACCAGTTTATCAATCAAAAGACGAAAGGAATGATCATGTGGCTATATAATGCTTTGTTGGCTGCCACTTTGAGATTAAAACTTTTTTGGTCCAAAAGCATTTTTAAAAA…
G1_V2_SSR_11288	p2	(TA)8	16	TGACTTCAGCTGGTGCCTGTGTCTGATATAATATATTATTTATAATTCGGGGGATTGCCTCGGAGGGGCTAATTTAAACTATCAAGCATTCTGCTTGCTGATCTAAGAGGTAATTACAATTCCATTAACTATCTATGCAGGTATGAATATTATCAATTAACTAGCAATTAATTTTGAATTTTTGGGATTACAAAGTGAGTATATATATATATATANNNNNNNNNNNNNNNNNNNNNNNNNNNNNNNNNNNNNNNNNNNTTAAATTGTAACGTTGTTAAAATATTTATGTATATGGGTGCCACATCATTCCACGTACACAAACACCCTAGGGAAAATTGCCAAACCCGAGAAAAAGAATCCAAGGTTAGGGCTAGCTGATATTGCAAAAGATCCATGATT…
G1_V2_SSR_17842	p2	(AT)8	16	TCCCCGATTTTATTTGACGAGCAAAAGCCATTGGTGGCGCTTTTCAGTTCGTGGTAGGAAAATGCATCAATATTGTTTTTCAGGATTTGTTCACCTGATTTCATGAATATTAATTACATATATGAATTTGCCATAATATTAAGACAATAATTAATTAATTAATTACATATTGAGAAAGTTGTGAGGACAACGATGCTTCATATATATATATATATANNNNNNNNNNNNNNNNNNNNNNNNNNNNNNNNNNNNNNNNNNNNNNNNNNNNNACTAATAGATAGAGATATTTATGTTATAAAATTAATGGAAAAATTATGTCAAAGAATCATCTTTTGGATTCTATGAAAAAGAACTTTATATCACTAGAAAACAATAATCATTTGGAAAAGTTGAAAAATC…
G1_V2_SSR_6928	p2	(AT)9	18	CACTCCAAAATGAAGAATACATCGGTAATAGTCCATGTGCTAGCTAGTCAATGATACTTAATTATATATCCTTTCAGTTTTCAAATCAATCCATATTTGAACATAGAACATCGAGTAAGTAAGAAACACCATTAGTGCAAGTTATAAAGCAATGTGTGTATTATTTAGCTAATCAACTATTCAACAATTCCAATTAGAAATATATATATATATATATNNNNNNNNNNNNNNNNNNNNNNNNNNNNNNTCAAAAAAATCTTTAAAATTTAGATAAGTTTAAATCAACATATAATTCTAATTCTTTCTTTGAATAAAAGATAGAGGGAACATAGTTAGAAGAACAACATGTTTTTAGTAACGATTAACACATTCAAACAAAACCAAAAAATAAGATATAAA…
G1_V2_SSR_56555	p2	(AT)7	14	CACAAGATACTTTTATTAACGAACAGAAATCACTTAATTTGAATATAAATATTTTTAGCAATATTGTTATAATACTTATATAAACTTTATTTAATTCAGGCATAAAATCAATCTTTTTATTAGTAAGTACAAATTTCTTAGTGTACAAGTAGATAGACAATTACTAGTATAATACTTGTATAAACTCATAAAAGAACACATATATATATATATTATGCTCTAGACCATATGCCAATTATACCATATACTATATATTATATTATATATTATATAATATGGTATTATTTTTGGCTGCCTGTCTGCCTAGGTTCTTACATTAATTATTGTAGAATTGCAGAAGCCCAAGAGAATGTGAAATTGTGACAACCCCATGTGATTAATCTGACTCCCATTCCATTC…
G1_V2_SSR_32763	p2	(AT)9	18	TATGACGATTACATTTATATACTTAAAAAAGATTTCCAGATGATATATATAGAGCAATGCAAACGTTGAGCGACTCATAGAATGCAAGACAAAGGTAATTTAATCTAATAAATATGAAATGTTATTTAATAAAATTGGAATACCTAATTAAGAGATTTTTATTGTTTAATCCGTGAACTACTGGATTAGCTATAATGAAATATATATATATATATATNNNNNNNNNNNNNNNNNNNNNNNNNNNNNNNNNNNNNNNNNNNNNNTGATTTGAGATCCAATAATTAAAAGATTAATTGGACATTTTTTTTTAAAGCAAATTAATAAAAGCCCTTTAATAGATAATTTAATTTACAAGTTGGGATAATTTGGAGAGGCTGGAATTCAGTCCATCTTAATTTA…
G1_V2_SSR_11957	c	(AT)10gtgcacacaat(CA)7ctaatatattcattgg(T)13	74	ACTCATAAACCCGATTATTATTTTATTTTATTTTATTTTATTTTATTTTATTTTATTTTATTTTTTAAATAAATAAACTATATTATTCTAAGTTAAGGACACGTAAATACTAAATTAATTAATAGTTTTAGAGTGATACCTAGTCCTAATATACATCTTTTACGTCTCTTTAACATAAGAAAGGTTGCTATATACATACATATATATATATATATATATGTGCACACAATCACACACACACACACTAATATATTCATTGGTTTTTTTTTTTTTATTTTTGAACTCAAAGTGATTGACATTGGACATATCGCTAGCTTCACGTGTAGGGGATTAGCATAAATTATATACCAAAAATTTAAAAGACTAGGTTGTTAAATTAATAAGTAATATAATGAACTG…
G1_V2_SSR_62961	p3	(ATT)6	18	CTCCCTTTTTCAAAATACAAATGTGTGGACTTTCTTTTTGAAAAATAAATAAATAAAAAAATGAAAGGCAGATTAAAAAACAAAAAACATAGTGTTTTCATTTTGTATTTCCATTTTCCCCTCGTGCGTGCTCTGTCAAAAAGGAAATTATGCAATGTGACTTCTTTAAGCGTTCCCACATTTACTTTTTTAAAAAAAAATTATTATTATTATTATTACTATATTGTGTTGAAAATAAGTAATTAATTTTAAAAATATCATTTTCATTCTATTAAAAATAAATTTTAGAAACATAGTTTAAAAAACAATATAAGCGCTCTAAAAAATTATAAATTGCAATCGAGAAACACAAGGTACAACATTTTTTTCTTTAAATGAAACCTCAAACTTTCCGGCTTT…
G1_V2_SSR_11201	p2	(AT)12	24	GAGAGGTTAATGATTCTTCCTTGCACATCAGTCCGATTTGCAGTTTCTATCATTTTCTCTAGTAGCATTTCTGTCAATAAATAATGTCCTGCCATACAAACAAAGATCCTAAGTAATTAAACTTTTAATCTCTTATTCAAGTAAGAACAACTCAAATTCACAAATCTATGAGATGGATTTAGCCCCCGTCTGTTATTACATATATATATATATATATATATATTATATAGGTTAAAAAACTCTATATATTGTATAGGTTGACTTGTGATAAATTCTGAGCTATTTCCGTTTTTAAGGAGAAAAGTAGACGAGAGAAAATTTAATTTAGTTCAAGTACATCAAGATTTTGCTTGTTTAACATTTTTTTCAATGACCCGTAGACCTTAGTTTGTAGACAGA…
G1_V2_SSR_61031	p2	(TC)8	16	ATGACTATTTATCTGATAAGTTATGCAAATATCAAACAATGTTTAGAACTTCTTGATTGCCATGTCTTTAAGTTGTCTTCCCATTCAAAATTTGACTGCTATGTATAGTTTCAAAGTTCATATTTTCATTGACCATGTTATCATTACCTGCAACTGAATGATAGCTGATGTTCTAATTGATTGTACATTCAATTCTCTTTCTCTCTCTCTCTCTCAGAGTTGTTTATTTTATTTGGCAGGAGATCAGGGCTTTTTGAATTCGTATTACTCTGACTTTCCCAATGCACATGTTTTTGAGCCAAATTTATCCTCGGAGGTTTTGAAGTCTAGACCTGTTCCTGATATGGAGCGACTCTCTACTCTATACAATGCAGATGTTGGTCTTTACATGCTTGCAAA…
G1_V2_SSR_59082	p5	(GTTTT)7	35	TGCATCACCATCGCTCTCTCTCTTTTACATAGTTCCTGTTCGTGTGCTTAAATTATATATATATATATATATATATATTAAGATGATTATCTTTGAAACGCCAATCAGGATTCAGGAATATTGTGTGGGAGAATCCTTCAAAGTCATAATAATGGTCTTCCATTATTAGCTCGCATTTACATAAATTTTTATTTAATATAGGTTGACTAGGGAGATTAATGATCAGATGGAGAGTAGTGTTAAGCTGTTTGAATTAATTCTATACAGTTTCAAGTTTTGTTTTGTTTTGTTTTGTTTTGTTTTGTTTTAACCACAGCCGCCCATTGGCTTTGTTGCACTGCTGCACATGATTTTCTGTCTAGACTGATTGTTAGTATTAGCTTGCTAGGGGGA*TTAAA…
G1_V2_SSR_1173	c	(TA)10aaagaatacggattaacaattc(TA)6	54	AACAAAATATTGTATCAAAATCGGCTATATCTATACTCAAATAAAGTATTATATAAAATAAATGATATCATTGTATGATATTATCAAATTGTTAATGAACAAGATGAATAAAATTTATATGTTTATAAAAAATTTATTCACATTGAGCAATATTACTACACAATGTCAAACTATTAATGTATTATAATAAGTGAAGTATTATATATATATATATATATAAAAGAATACGGATTAACAATTCTATATATATATATNNNNNNNNNNNNNNNNNNNNNNNNNNNNNNNNNNNNNNATATAATATTTATACATGTCAAATTCAATTTCAATCATCGTCAATGCATAGATTCATTTATTTATAAATGAATATAAATATATGTGTACAAATATGAGACTATATAT…
G1_V2_SSR_34155	p3	(TTA)7	21	CTACTTCACAATGATTCTAAAAGCTTCCTATTATTATTATTATATTTTTAATAAATAATAATAAGGATTTGTTCAGAGAGAGAGGAGAATGAGTTGGTTTCATGGATCGCCGGCTGGTTATGAGCTAAGACCAGAACAGACCGGCTTATTTGCTTGCTGTGCTTGTGTTAGAGAGAAACAATAATTTTTTTCTTTTTCTTTATTATTATTATTATTATTACCAAAAGCAGAAGAAAAGGACAGGCTCACTGAAATTCGAAATTTGAAATTTGAAAAATTTGGGGTCCTTAAAAGAATGAGAGGGTGTTTTCGGTATTTTAGTGAAAGGATAAAATTAGTGGGTTTGTCCTAACGGGAAAATTTATTTTTTTTTTATTTAAGATAAATTTGGAAAATTAG…
G1_V2_SSR_13349	c*	(T)10cttttaaaaaaattatacatttgaagttgaagaatcaaagtattacagttgaccagtgcttagaatgccgtggattgagacaac(AAT)6(AATG)6*	133	CTAATTGTTGTCTTAGATTCTGTGTTTTTTTTTATTAATATTTTTGTTGATAATGAACAAGAGAGTTAGAATTTAACAAAATACTGACGTCGCCTGTTGTCATATCAATTTTAAATTAAAAAAAGTGCTGAGTAATTGAGGGCAGACTTAAAACAGCAGGAGTTTGAATTCGTATATTTTATAATCGACTCATAAATAATTTTTTTTTTCTTTTAAAAAAATTATACATTTGAAGTTGAAGAATCAAAGTATTACAGTTGACCAGTGCTTAGAATGCCGTGGATTGAGACAACAATAATAATAATAATAATGAATGAATGAATGAATGAATGNNNNNNNNNNNNNNNNNNNNNNNNNNNNNNNNNNNNNNNNNNNNNNNNNNNNNNNNATATACCCAAC…
G1_V2_SSR_11202	c	(A)13cagattaaaattcccacaatcagattctaacaaaagcaaaaaaacaaaacaaaagaaataagaaaacttt(TATG)10	123	TCAACTATTCATGAATTTAGAAAGGACATACATGATAATGAGAATTCAAGGTATTCATGAATTTAGAACGGACATGAATGATAAGGAAATTAGAGATTACCAAGGTAATTTGTAGCAAATGTCATTTCAATTTTGTCTTCCGAGAACTCCAAATTCTTGGAATAAACCCCAGCATTGTTTCTGACCAAAAGAAAAAGTTAAAAAAAAAAAAACAGATTAAAATTCCCACAATCAGATTCTAACAAAAGCAAAAAAACAAAACAAAAGAAATAAGAAAACTTTTATGTATGTATGTATGTATGTATGTATGTATGTATGTATGGATTTATACTCACATAAGGAGGTTAAGGGGTAGCCCTAGAGCTAGAAACTCATGACAAAATCTCTGAACAGACGCCA…
G1_V2_SSR_33520	p2	(AT)9	18	ACTATTTAAAGTTGAGGTATCCTTTTGATTACTATTGTAATTTAAAATTCAATTTTTTTCTTTTTTTGTTAAAAGAAAATTGAGATGAGTTAGGGCAGAATTTTGAAGCCGATTGAGATAGTCTTTAGAAAGGATTGTATTTGACTCTTCTTGTGATATAGTATTATACAAATTAATTTAATGTTATTATATTCTTCACATATATATATATATATATGAGATATATAGCAACAAAATAATATTAATATATTAACTTATATAAATAAAGCGGAAAAAATTGAATGCTTTAATCATAACTTAGTAAAAATAAATAAATAATATGTAAAATAATCATTTATATGTACCAAAACTCTTGAAAGTACAAAAATAGTTAGAAGATTTTAATCCAACCTATCAATA…
G1_V2_SSR_35916	p2	(AT)8	16	ACAGAATAATGGTCGGTCAATCTTTTAAAATTTGAACTCGATTCCTACGCAAAAGGCGTGACTCAGTGGCCCGCACAAAACTTACCTAATTGGGCCCAGAGCGGGGTATTCTCAAAAATCAAAATAACCTAATATAAATTTCCATTATTTGAATTAAGCTAATTACTTTTTTTATTTTATTATGAAAATTCACATTATGATATATATATATATATACAATTTCTGAACCTAATATATGTCATTTTGTATAATTTGTTAATAAAATTTTATGTATTTATTTTGTTGTAAAGTCTCTGTCTTATGTTGTTTTATTTATTTAGGTTTGGTACCATATAATATGAAAAATAATGAATGGAGGACGATATTGGGTGAACCTTTCTGATCTTATTATCTTACGGT…
G1_V2_SSR_7189	c	(TC)6ttttaagttactttattataatttagaatctaattcttcttttattggctttaattgtctttttc(T)11	88	ACTCCATCTAATTTAGTGAAAATGTAAGATGTATGTTCTTGAGCATGAAGAATATTTTATTCGTAATGCTTTCATTTGACAGATAGAAGTCGGAGATGTTATATGTGAGATAGAGACAGACAAAGCGACCCTTGAATTTGAGTGTCTTGAAGAAGGGTAACATCCTCTCCTCTTGTAGAATTTCAACTGATGCTTGACTTCTCTCTCTCTCTTTTAAGTTACTTTATTATAATTTAGAATCTAATTCTTCTTTTATTGGCTTTAATTGTCTTTTTCTTTTTTTTTTTNNNNNNNNNNNNNNNNNNNNNNNNNNNNNNNNNNNNNNNNNNNNNNNNNNNNNNNNNNNGCATATTAGTGGTGCTGCCCTTTGGCTTTTTCTTAGTAAATCTGCTACCTGAG…
G1_V2_SSR_32556	c	(TAA)5ataataaatcaataataataaataatgctttagactttataatttaaaatatgtacaa(AT)6	85	AAATAATTAATTGGATCAACATGTGATGATTCAGAAATTTCATACACATTTATCAAAATATTATTTGTAATAAAACACTCTACTTTTCAATTTTAAAATCAAAATCCATCAAATATATATAAATACTTGAATATCACACAAAATTCCTCTACTTTTGCTAGCTTTTCATTCTCCTTAAAATCACTCCGTAATACCAATTTAATAATAATAATAAATAATAAATCAATAATAATAAATAATGCTTTAGACTTTATAATTTAAAATATGTACAAATATATATATATACGAGCATTAAAACATATATCTATTTACTAACTAAATTATGTAAATAATTTACTAAACCTAAAACCCAATCATTAAATACTAACCGAACATCTTTTCTTTACTTTCTTTCTTTTC…
G1_V2_SSR_25686	c	(CAT)9ctctgtctctgtctctctctg(TC)6tttatctata(TATC)7	98	TAGTAATTGTTTTTCTTTGTTTTGAACTTGCGATGAGCTTAAGTTTCACAATTCCTTTTTGTTTCTTGTAGCTTGGCCTCAGTTAATGTTTGATTAGTCCTTTTGTTAGATGCTTTTGCCCAATGATGGAAAACTGTTTATGTGGAGCGGTAGCATGGATATTCATTTTGAGCCTTTATTTCTGTTATCACCTTTGTAGCATCATCATCATCATCATCATCATCATCTCTGTCTCTGTCTCTCTCTGTCTCTCTCTCTCTTTATCTATATATCTATCTATCTATCTATCTATCTATCTTCTTTTTACGACAGATAATGATAGGTAAAGGCTCATAATGAACCCATTTGGCAATACCATCAATGACCGAATATAGCTATGAGATCTGAGGGCTATTTAAA…
G1_V2_SSR_10906	p2	(AT)9	18	AATTGACTTAACTATGGCGAGGACTAGTGACTAGTGAGAGGCACGTCCTCAGGCCAGCGATCGATCAGGTTATGGAACCGACAACCGAGTACAAATTTCTGTATGCATGTTAAGATTTTTAAACGTAAAACACGCAACCAATATTATGAATGTGCATGAGATGATCCGGAGAATTTAGTATTACATCATCAGCTGGCTGATATATATATATATATATANNNNNNNNNNNNNNNNNNNNNNNNNNNNNNNNNNNNNNNNNNNNNNNNNNNNACCAAAGCAGATGATTAATCACAGTTTTAATTATTACACGGGAAAAATCTGACAAATACTCGCCTTACACGAAAGTTTAAAATCGTCTTTCTATGCATGCCTTTTTGCAGTTCGTACACATAATATATA…
G1_V2_SSR_63848	p2	(AT)8	16	AGTATTTGCAAGCCAAACAATGCTTAAGAGTAAAATCCTCAAATTTAAGCAATTCCAGCAAGATTTCGATCGTTATTAAAATGGTGTACAAAGGTGAGTGTTGTAGAGTGTAAGGAAGAGAGGAGGATTGGGCTGACAGTTCTCTCTCTTTTACTTTCCCTCCCTAGTTCTTATACGCACACAAATTTGTATTAATATAATATATATATATATATNNNNNNNNNNNNNNNNNNNNNNNNNNNNNNNNNNNNNNNNNNNNNNATTCTTCTTTGAATTGATTTTTTCCCGGTACCCATCTTCAATTTTCTCTTATATCTTCTCAAAACGAATGGATTTACAACTTTAATTAGAAAATTTGTAATTGGAAAATCAACAAAAAGAGATGTAGAAGCAAGAAAA…
G1_V2_SSR_61701	p2	(AT)8	16	TAATTTGGGCATAAAAACTTAAAACAAAAGGGTAATCATTAAGATAAAATAATAATATTAAATAAAGTAATATTTGCGTAACACAAATAAATTTTTTTAAAAAGTAAGAGCAGTTAAGTGGTTTGATATATATTTACAAAACATATATATCTTCGTACATAGAATAAAATTTAAGTTATTCAAGTTTTTCGAAGATTTAATATATATATATATATGTGTATTAGAATTAATTCAAGAAGTTAAAAAATAAAAAGTAGAAACCTTTTGAGTACTATTAGTTAACCAAAAGCTTTAAACAACTAAAATCAAAATTACTTAAATCTCCGTGGAATATTTAATTAAGTGAAATATATATATATATATATATTGTAGAAGTGTACAAATTAAGACAAAAATTAA…
G1_V2_SSR_10239	p3	(TTA)11	33	TTCTTCTTCTTCTTCTTCTTCTTCTTCTTCTAAATAATACTAATTACAATAAAGATAAATAACTAATGGCTAGTTGTAGTGCTGGATCCAACTCCCAACCATATTTCTGACTTCTATTGGTCACCTTGGAATGATTTCATATGGTCCATTTTCAATTTTGGGCATATTTATCTCCACAATATTAATCCCCACTTTATTGTTATTATTATTATTATTATTATTATTATTATTATTNNNNNNNNNNNNNNNNNNNNNNNNNNNNNNNNNNNACCTTATTGACCTATTACCAACATTCCAATCCAATTACTGCAAAAATCCCATATGCCTCACTTTTTTCCACTGCCATTTAATTCCCATTTTGAACCTACTATTCCTTCATTAATATCAAAGTCTTCTCTC…
G1_V2_SSR_49226	c	(TA)7ataaataaataaattttccatggcatgaaa(AGG)8	68	AGACAATATGAACATCACAGACATTACCTTTCTATTTATGAAATTAATCTTCAATATATATAGTAATGAATTCATATACAAAACTTGGCACGCTTTCTTAAAATAAATGAGATTTCAATTCATATAATATTCACTTGGGACCTCATACAGTTGTGTAATTAATC*AAACTTG*AAAACAAAAAGAAAAGAAGTTTTAATTATATATATATATAATAAATAAATAAATTTTCCATGGCATGAAAAGGAGGAGGAGGAGGAGGAGGAGGAGCAAGCAATGGTGTTTAATTTTCTCTCTCACTTACTTTTCACACAACAAAATTAATTAATTAAGGAGGTGAGAGTTTGAGTGATCCCAATGGGATGTGCTGTCCCATCGAACACAAAGGCATGCATTTAGG…
G1_V2_SSR_16335	c	(AT)10nnnnnnnnnnnnnnnnnnnnnnnnnnnnnnnnnnnnnnnnnnnnnnnnnnnnnnnnnnnnnnnnnnnnnnnnaaatagacacaaa(T)10	115	TAATTTAAAAAACACCCTAATATTAAATTTAAGAAAAATTAAATAAAAAATTATACACGTTCATTTACATCATTTATAGATCATTGATTTATACACTTTTAACAATTAAAATTAAATCTAATATATATAATTAATGTGATGTCATATTCATTTCAATCATCAAAAATGTATAGATCCAACTGTTTATAAATGATTGTAAATATATATATATATATATATNNNNNNNNNNNNNNNNNNNNNNNNNNNNNNNNNNNNNNNNNNNNNNNNNNNNNNNNNNNNNNNNNNNNNNNNAAATAGACACAAATTTTTTTTTTGTTACAATAACTAGAATTAGTTTTTTAATTTAATATTAAATGTGAAATTTTTCTTTAAATATTTAAAATTTTCTCAAAACTACTT…
G1_V2_SSR_44305	c	(TTA)7ttnnnnnnnnnnnnnnnnnnnnnnnnnnnnnnnnnnnnnnnnnnnnnnnnnnnnnnnnnnnnctgctagttcaataagaag(A)11	113	TTGAGCATGTTGGGGCAATTGCCAACCACGTCAGCAACTTCACCGTCTTATCCTTGTTCTTCAGTCTAAATAAATGAAAATGAAAATCGAATTTTTGAAACTCAGATCTACCCCTGCCGTTTCCGTTAAACAGAATTTAAGTGACTTTTCCTATTGGTTTTCACAAAAATTTCTTGTTTCGACAATTGGCTTCTTCTTCTTATTATTATTATTATTATTATTNNNNNNNNNNNNNNNNNNNNNNNNNNNNNNNNNNNNNNNNNNNNNNNNNNNNNNNNNNNNCTGCTAGTTCAATAAGAAGAAAAAAAAAAATGTAAATTACATTTACAGTCATGTTATAACATACCGGTATTCCAATATTGTAAATAGAATAAGATTAGACGAAGATGTAAGTTTCTA…
G1_V2_SSR_2688	p3	(ATA)9	27	CCGTTTTGGATTGGGTCCAAGTTTTCGTCCGGGTTTATTTAATTACTTTTCCCTCAAAATTATTAATATATATATATANNNNNNNNNNNNNNNNNNNNNNNNNNNNNNNNNNNNNNATTTTAATTTTTAAATAAATCTTAAAAATATGATAATAGTTTAGCCATATCATTTACTTTTTAAGTGGGAAGTTTGATATTATATAATAATAATAATAATAATAATAATANNNNNNNNNNNNNNNNNNNNNNNNNNNNNNNNNNNNNAAATACGAACTTTTAAAGTTTAAATGTAATTTATATTTACTTCTATGAGAATTTTAAAATACTTTTATTTAAATTATCATTTTTTTTATTTTATCCACATACAAAAAGGTTCAATAGATTATCTTATAAAAATAGC…
G1_V2_SSR_59125	p3	(TTA)6	18	CCATTTAACTTAATTATAACATATATATAAGCAGCCTTTTTCTCTGCACAGTGCACATTCTTTACTTTTAGTGTGAACGGAAAGATGAAAGCTCTTAATATTTTCTTATTTTTTCTTTCATTTTTAATATTATTTTTTGCTTCCTCTGCTCATGGATCCAGCACCAATGCTAAGGTAATTAATTAATAAATTTGTAGACTTATTATTATTATTATTANNNNNNNNNNNNNNNNNNNNNNNNNNNNNNNNNNNNNNNNNNNNNNNNNNNNNNNNNNNCTTTTTGTTTTTTAATTTATTTTTGTTTTTCAGCATCATATTGTTTACATGGGTTTACATTCATTTCCAAATGCTGAAGCAGTAATTAAATCCAACCATGAATTATTTTCTTCAGTTCTTGGC…
G1_V2_SSR_35332	p2	(AT)10	20	ATATAAAATTATAGAATTGTTGATTCGCCTTCGTGTATATATATATACATGTACATTAATTAAAGGAATTAATTATACATTAATTATATATGTTAGATTTAATTTCAGCTGTTGAAAGTGTATAAATTTAATAATTTTAAATAAACATAAATATATGTATAATATATAAGGTGGTTGATCCATTTTCACACACACAAAAATATATATATATATATATATGCAGCAATCCCAAAGGAAAAGATAGCCACTAGAATAAGAAATGCAACTAATGAAAATACTGGTGTACAAGTTTTCGAAAATAGAGAAAAATGTTGGGTCATTGTATGACAATAATTAGACATGAAGGTTCAAAAGAACAAAGCAATCAGTTGTAAACATTATTGAAGCTGGGAAGTTACT…
G1_V2_SSR_26901	p2	(AT)9	18	AACTAATTTTTTATTTATTGAATTATCATGATAGTTAATTCTGATATTAACGTAGTCAGGGTTGCAAATGAAATGAAGTATTGGTGGAGTTTTTTACAATTGCCGGGTAAGAAGAAGGAGAATCCTTTTCGGCATATTTTAAAGAGAGATTAATGTTAACTATCATTAGTTACAAATATATCCTTAAACCCATATTCAAATATATATATATATATATNNNNNNNNNNNNNNNNNNNNNNNNNNNNNNNNNNNNNNNNAAAAATTCATGATATTTCCTAAAACAAATGTTTTATGAAATTGTGGTTTAAATTGCTACAAGTTGATGAGCACGTGGGTTGTCAGTGCGTCAGATAGCAGAGGTGACAATCATTTGAAGCATGCTTGTATGTGGGGCTGAGG…
G1_V2_SSR_18354	p3	(GAA)5	15	AATCGGTTTAGTAAATACTATGATATAATTTGTTTATTTGTATTAATTAAGTATCCAATCCTTACTGTCAACTCGTGTACTTCTTAAAATTTGATAAAAATTTTAAATTATTAATTTCAAATGTTGGATTTATAAATATAAAGGTGAAAGATTAATTAGTCGAGAAATTAAAATAGAATGTCAATGTCATAGCTCAAATGAAGAAGAAGAAGAATAAAACCCATGCACTAGGGTCATTCTCATAAACCTCTGGCACACATTACATATTATCTATCAAAAAATAAACCCGCAGCGTCAGAGATTACGGCATTTCACCCACCACGACACGACGACGTAATTCATACAAATATTTTATATGCATAAATGGCTGATGAGATGCTTTCGTCAATACCAGAATAA…
G1_V2_SSR_45191	p2	(AT)7	14	CGAATTGAGCAGATTGAATTAGATTATGAACACTCCCATTTAAGAGTTTCATGTATAGTTTTTAAATTTATAAATTTATTTTAGATATTAACTCTCTAACTTTATTATTTTGATATTTTAACCATAAATTTTCAATTTTGATTCTACACTCATCAGCAATCATCTACATTTAAATTTAAAACAAAAAAATAATAAAACAATATATATATATATNNNNNNNNNNNNNNNNNNNNNNNNNNNNNNNNNNNNNNNNNNNNNNNNNNNNTAATAGAATTAATTAAATATGTCTAGAAATAAAGAAAGCAACCGAAACAAAGACCCCACTAAATGATGATCAATGTTATATGACACATGCAATCCAATTTCATGTTTTGATTGGCAACGAAATTGAAAATAACT…
G1_V2_SSR_37898	c	(AT)9nnnnnnnnnnnnnnnnnnnnnnnnnnnnnnnnnnnnnngtgtgagtttttaaaacttcaggagagaaatttgttaatttctc(AT)9	118	TTATAGCTCAAAAAATATACATTTTTGCTGATGTTTTGAAAAGTATGAATTTCGTTTTGATGTCGAAATTAGGAAAATAAAAAATATATAAACTAAGTTTAAAAAATAAATATGAGAGAACATAGTTGTATTTTACTAAATTGTCAATAAAATTAATGGTCAAATAATAATTAATGTTAGTCAACTAACAATTTTAGAGATATATATATATATATATNNNNNNNNNNNNNNNNNNNNNNNNNNNNNNNNNNNNNNGTGTGAGTTTTTAAAACTTCAGGAGAGAAATTTGTTAATTTCTCATATATATATATATATATTGGCATAATTCAATTCTTTATCGTTTGACTCGTAAGTCCAAATCTTAGCTAGCTCCTAGCCATGAAAAATTATTATGCTGCA…
G1_V2_SSR_6347	p2	(AT)7	14	TGATATTGAATGAATGGGGCATCTGATCTGGCTTGGATTTAGAGCAGCTCTGGTGCCTATTATCCGGCCCACAGAGGATGCTGTCTTATTTATGTTCATGTTAGACAAGTTTCCAAAGTAAAAAATTTTCAGGTTGTCTGCAACGTTGGGCATCTTTCTTTCATTACACTATTATCTACTCCTTGACCACTTCACGTGGATATATATATATATANNNNNNNNNNNNNNNNNNNNNNNNNNNNNNNNNNNNNNNNNNNNNNNNNNNNNTACAATATTGTACAATCTATTTAAATATATATTTTTTATTTTTATTAATTTTTTTATTGATAATTAACTCGTTGTATATTCGAAGTACAAGTGAGTATTTTTTTCATTTAGTTCCATCTAAGATCCAATTGA…
G1_V2_SSR_19199	p2	(AT)6	12	GGGTGGATGACCTATTCAACTTATAACATATAATATTTAAAATAAAAATTCAAATACTGCTATATAATTAATACAAATGTAAGACATTCATTTTAAAAGTGTTTAAATTTAATTTTTTACAAATAATGTAAAACATCGTACAAAATTAAAAGAATATTAATCTTTATATCCATATATACAATTTATATATATCTATATAATATATATATATNNNNNNNNNNNNNNNNNNNNNNNNNNNNNNNNNNNNNNNNNNNNNNNNNNNNNNGAATTTCAAGAAGAAAATTTGAAAACGTATTTCTATCTCGACGGAGAAAAGTTGTCGTGCAAGTGAATGTACTTAACGTAATGTCAATCTCGAAACTGAATAATTTATCAGTGACAAATAAATTAAACAGGAAA…
G1_V2_SSR_51471	p3	(TAT)15	45	ATATATTACGTTGTAATTTTTATTTTAAATTAATTATTTTAACAATTATTTTTTAATAAAATATCATATTATTTTAATTATTTATAAAATTTATTCATATAATATTTATTTAAAAATTAAAATTTTAAAAAATTAATTTATAATTATTAGAGTAATGTTTACTTTTGTTTATAAAAAATCAACATAATCTCATTATAACTATTATTATTATTATTATTATTATTATTATTATTATTATTATTATTTGCTGTCATCATCATTCATTTTCATTATACATAAAATATTTTTTTATATATTTATTCTTCATATTAATTTATAATTTATTTTGATATGACTTATCCTGACCCCTCTTAAAAGTTTAGGATGAATCCTACTAATTATCTGAGTATTCTTTCTATA…
G1_V2_SSR_27160	p2	(TG)10	20	TTGATAGAGTTTGAAATCATTTAAAAACCATGCGACTTTCTTTAACTCTTCTCACACACACACACACACATATGCATGGGTCCAACTCTATATCTTGGCATAACAATTTTGTCAAATATTATACACTTGAACATCATTAATTTATCACCAATTTACCATCATCTCGATAATATATAGGTATATAGATAAGGGGTGTGTATGTGTGTGTGTGTGTGTGTGATGAAAATATATTAGCAAAAAGAAAATAAAAAATGGAAAAAGGAAAAGGTGAAATAGGTACATAGGGGTTGGTCGGGACAAGAGATGAATGATTTATTTATATATGTGTGTGTTCACTCTCAATCAAGGGATGAAAAATGACAAAATTAAGGCATAATGGTAGGGATTTTCTTTTTGAAA…
G1_V2_SSR_59296	c	(A)12nnnnnnnnnnnnnnnnnnnnnnnnnnnnnnnnnnnnnnnnnnnnnnnnnnnnnnataaatata(AAT)5	90	GATGTAATTAAAGAGTTGAATAATTATAAATAGATATATTTAAAATGAGAAATGTGATTGTAAAATATATGGTAATATTCAACTACAAAATTTTCCCCCAATCATGTCAATGGCCTTGCTAGCTAACTCGAAAAAGAAAGGAATTTGGCAATGAAATGAAAGCATGTAGCGACAATTTCAATTATTTTCAGTCAAAATTAAAAAAAAAAAANNNNNNNNNNNNNNNNNNNNNNNNNNNNNNNNNNNNNNNNNNNNNNNNNNNNNNATAAATATAAATAATAATAATAATTATTATAATAATTAGACAGTGTGGGAAGATTTTGGTACGGTTGACGGAGGACCAAAATAATTATTATTATAAGTTGCAAATAATTAATTAAAATCGCGTAGAATTAGCAA…
G1_V2_SSR_3904	p2	(AT)7	14	GAAATTTTCCTTTAAATTACTATAACAGATGAGATGAAGTGTATGCTATAAACCCGACCCATTTTGTGTTGTTCTTAGATCAAATACTAAAGTATTTTAATATATATCACATTATATCAATAAATGAGAAATATAATCAATCTAAATAATACACAATTGTCTTCTAGTACAAAGATTATTGGTATATATACATACACACATATATATATATATGCAAAACTTGTACATAATTTTTAATAATATTTTGATTGTTATAATTAATAATATCAAAGTATTAACAATTAATTAATTATACATGATTTTATAATTGTTAATATCAAAGTATTATAGCAATTAAATAAAACAGTATCTCTAATGCACAAATTAATTAAGAAATGGTACTATGGCAGTGTTAGCTTG…
G1_V2_SSR_27201	p3	(TAA)5	15	CTAAAATATCCAACGACTGCTATTTTTCTTTTACAGCAATTGCGTGTTAAATGATACAACGTTTCAGTTCCGGACATGCTTAAATTGTCGCCAACATTTCAACTCTTAAAAAATAAACAACTGAATGGAGAAATTGAAATGAAGAAGCATGATTTTCTTTTTTATTTTATTTTATTTTATATGTGCTATATATAAATGCTAATAATAATAATAATCATAAAACCAACAACATACTAATTTCATCTTGTGTTTTAATCATCTTAGACCAAGAAAATTCCAATTTACACATAATTTTGTTTTGCTAATATTTCTATCATTCTAACCCCTAATTCTAATTCATCTATGACTATGATCATTTACAGAATCAAAAACATTGAAACAACAAAACCAGACCAAGAT…
G1_V2_SSR_35753	c	(A)10tttaacacaaacttctagcttaataacacgaatgttg(AT)6	59	TATATATATATTTTTAAAAAAATCATATATTTTTTAGATTATTGTTAATTTATATATCTTTTATTTAAAAAATTAGAATATTTTTGATTTTCTTATAAAGAATATATACACGTCTAATATACGCATGTAGAAGGCTACACAAACGCCTAGCATAAAACATAAAATTCCTCCTATAAAATATAAAAATTAATATTGACTTAAAAAAAAAATTTAACACAAACTTCTAGCTTAATAACACGAATGTTGATATATATATATANNNNNNNNNNNNNNNNNNNNNNNNNNNNNNNNNNNNNNNNNNATAAATAATTAATTAAGCAAGGCAGTTCTCAGAGCAGTTAAAGGCTATGCGACGCAACCTTCAGAAGAAACTTATAATAAGAGAACCAAATAAAAACT…
G1_V2_SSR_36428	c	(AC)8a(TATG)8	49	GTATAATATCCTTTATTGTTATATTATTAATTCAGAATTTATTTCAAGAGATTTTGATGATCATCTCCTGCCAATTTACGGCTTGGACCAATAATGAGCAACAGCAAGATCTGAAATTGCTGTTTCTAATATATATAAAGACATATCATTGAAGCAACTCAACAAACAATGTTGAATTGATTCCATTAATTAATTACTTACACACACACACACACATATGTATGTATGTATGTATGTATGTATGTATGTCTCCAAGGGTCATATCATTCATCTTGTAGTCAATTAAGTTGCTTAAGCTCCACAAAATCTAGAATTAGAAGCCACACAAGGAGTTAATCAAGACCACAGCTTTCTCTCCCACGTTAAAAAAATTGTTCGATAAAGTAATTATTTTACAAT…
G1_V2_SSR_20640	p2	(AT)9	18	TATGAGTATATCTTTCCAAACTTGTCATTTCTTAAACTTGAGGGGAGATATGTGTTAATTCTCCATACTAATAATACTATTCAGTACTAATACTCTATATATCAATTTGTGATCTTCTCTTTGTTAGAAGTAAATATTTGACTGCTCGTTGCAATTTTGATTCATCAAAATCTCTACAACATCAATTTGAGATTAACTAATATATATATATATATATGTATATATATATTATTATATTTATAATATTGATACATAGAGTCAATTTTAAAAAGTTTTGGAGTTAAATATTAATAATATTTATTTAGGAGTTGTGATTTGTGATATCCTATCTTGTTTCGCGCCATTTTAAAACTAAATGCTATCGAGAATTTTGATTGATATAAATGTGATCCAATTTAA…
G1_V2_SSR_63893	p2	(AT)8	16	ATGGAACAAATACATACACTAACCAAAACGTATCCTAATTAAAATCTAACAATATATATTGTGGAGAATGGGTTAATGTACCTGTGGCGGGGCTCACTTCCCATGTGATAACGAGCCAGAAAACATGTGAGATTACACATATTGGTATGGCAAAAGAAAGCGACAGACATGGAGCTAGCAATCGCGTGTATGTAGATACATATATATATATATATTTCTAACAATCACTATTAATTGTAATTAAGTGAAAGACATATATATGCATGCATTTATATCTTAATTAATATAATATCTACAATTTTGACCTGAAGTATTGTGTTCAAAACATGCAATGTCACAGATCCAAAATTCCGGTGTCTTCGCGAGGATCCAATTTTGTTGTATATCTTTAGTGCTTGT…
G1_V2_SSR_63475	p2	(TA)7	14	TTACAAGCTTTATATTGCGTTTATAAATTTAAGTTTGATTAATATATATAATATTGTCATGTACATGTTTTGTTAATTTAGACTTGTATCATCATATTGACACATTTGATATTGAGATTATGAGATTGATGTTTATTTTTACAACTTAATGTTGATTTTAATATTTTTAATTTTTAATTCAAGCTTTTATAACTAATATTATATATATATATANNNNNNNNNNNNNNNNNNNNNNNNNNNNNNNNNNNNNNNNNNNNNNCAAGATTTATAAATTATATTCATAAGTTTTAATGTCCTTTACAAATATAATATTGTCCTTTATTAGTTTAATGTTAAATTACACTTATATCAGCACATTTAACTTTGATACTAAGTTTATGGAATTGATATTTGTTTTTA…
G1_V2_SSR_4373	p4	(TTAT)6	24	AACACTTTTAAGACCCAAATTTTGAACATCTTAAATTACAACAAATTGATTGTTTGATCGAAACTTTATCCCCTATAATAAAGAAATTAAGATCCAACTTTTGTAATTGATAAAAGACTTGAAAAGTGGAGAAAATATTTTTAATATGGTTCTTACTTGTTGTGTTCACTATTAATAAATTTATAAAAATATTTAGTACTTATTTATTTATTTATTTATTTATATTTGTTGATCAATTGTTTATAGTAGCAAATAGTTTGTAATTCAATCTCGATAAATATTATGACTATATGCTATTAAGATGTTATATGTTGATGGAACACTTTCACATATACATATATACATACATACATACATACATATATATATGTATTAATTTCTATACCTACTTGTATGCAC…
G1_V2_SSR_4622	p2	(AT)8	16	TTGTTATACGTTGACCAAGACTAACGATAGTTTATAAAAGGTTTGTACGTGATAATTTTTACAAAATTACTTAATCCATCTAAGTAAGATAGAACAATACAACCATTCTTTATGCCTTCTTAATATACAAAACACTGAAAAAAGTACATATGGCCTCAACTAATAATACCACATACACCAATTAATTGCAAATATAGTAATATATATATATATATNNNNNNNNNNNNNNNNNNNNNNNNNNNNNNNNNGCAATTTCATTTTTTTACATAAAATCTTACATTAGTTATAAACTGTTGGATATAGACACATTCATTACGTATATCTAACGATTTATAATTGATATAATATTTTGTGTAAAAAAGAGTTATTGATCTTATCCATATATATATATATATATAT…
G1_V2_SSR_29182	p2	(TA)10	20	CATCTAAACCACTAAAAAAGTTTGATTGTATGTGCATCATTCTTCCAATAATCATATAGTGGAATCATAAATCTTTCTTCTCATCTATCTATATACCAACTCACTATATATGATTTTTTACGCATGAACACTTATGTCATTTGCCTGCATATATGTCACCCATTTAGAGGGCTCATTTTCAGTGGTTTATAACCATATTTATATATATATATATATATATGTTATAAGCTTAGTGGAAGAAGTACTTGGAACCTTCAACTAAAGTCATTATTCCCATCATCAACTTAAAACAATAATATGTTATTTAATCAAGTTATCCCAATATTGTTTTTTCTTTTTCATGATGAAGAAATGATAAAATTCAAAGCGTGGAAACCACGCTCCAACAATATGCAGACA…
G1_V2_SSR_2564	p2	(TA)7	14	NNNNNNNNNNNNNNNNGGGATACTGTTCATGATATTGAGCTGGTTTTTAACCAGTGACCTTACTTTCATTTTTAATCTATTATTAATTTGCCCAATACTATAATGATAGACCTTGAACAATGAATGCATACACATATTAAATTTCAATTTTACATAAAAGAAATTTTGAGTGTACTTTGTAATCATAAAATCTCCAAATTATATATATATATAAGGCAAATGACATATGAACCCCAATTTATTACTTGAATGATATGTACACCTCCACTTTGCAAATAATTGTCAAATACATTTTTTTCATTAATTTTTCGTTAAAATTAACTGTTGACTCAATGTTGACTGGTTCAATGACAAAAATACCCCTTTAACTTTTATTTGACCAATATAATGGCATAAATA…
G1_V2_SSR_23087	p3	(GAT)14	42	GTAACATTGTTAATTAACATAATTAGATTTTATATATAAATATATAGCTTTCAGAGTCAAGGCCAATGCCAGGGATTTATCATCACCAATGTTAAACGTTAACGTTCAGTACTCTATCGATCGAGAAATTGATCGATCGGCAGGAGGAATTAATATGGGTGAAAGAGATTATGACAAATCAATTCCTGGTCCGCGAATAGATGATGATGATGATGATGATGATGATGATGATGATGATGATGACGATGCATGTAACGTCGAATTGTCGAAGAAAGTAAACGAAGTTGATTCGACACAATCACCTCCAATTGAACAGCTGATGAATTGTAATTATATCCAGGCCAGGCCTTCTCTTCATCTACTTTCAGGTCAGCGCTCTTTCTCTTTCACTCTTACTTC…
G1_V2_SSR_27832	p2	(TA)7	14	AAATTCTATATTTAGAAGCATTTATAGTTCTCCATTCTTAGAAAAATTATTTACAGGATATGCATTCAAATTTTGAGGATGTAAAGTTGAAGTTCTTGGTCATTTTTATTTTACAAAACAAATTTTAGAACATATATAAGATGTTATTTGGTGTGTATTAATTTAAATCTCTGTTAATAACTTAGATGGCCATCCACAGTATATATATATATAGATATATATTTCGACCTAATTCAATCATTTACATGTTAATTACAAAGTATAATCATAATGTTAAGAGTACCACGCCCCATTTCTCATGAAATAGTTGCTGATTATTTATTTATTTGTCCGATTGTCTCTGTGTGTATATATATATATATATATATATATTACTTCTATACAAAAGCGCAGGAATGT…
G1_V2_SSR_6433	c	(ATT)5gtatac(T)10	31	CTAAGTATTGGAAGTTGTTTCTTGTTAGGGATTTTTTTGTTATAAATAATCCAATTTTATTCTTATCTGTAATGTTGATAAAATTTTAGACATTTCTTTTATTTTATCCTCTTGCCAATAGATAAACGGTCGTGATTGAAAGAAATAACGCAAGTTAGCTTGGATTCTCAACTTAGATTTAAATTGAACTCTTTTTTGCATTATTATTATTATTGTATACTTTTTTTTTTGGAAGGTTCTTTGCGTTAATTTTAAACTTACTCTTTTCAGTAATTATATCATATTATTGTTATTATTTTAAAGGATAATTTAAATTTAATATAAATACACTTTATTCCATTTACTTTAAGAAGATAATAAGAAGATAATAAGAACATAAATTCTAGAAAAAAGTGCACA…
G1_V2_SSR_37775	p2	(CA)8	16	CATACATAAATTAACATTCCATTGGAATTTTCATTCCATATATAACCAAAGAATGTGAGTTATGAAAGTTTTAACTTCAAATATTGTATGTATATGCATTGGCAAGAACAAGAAGCTGCATTTTTGCCAATTGCCAATTCGTAATTCAGAGAGTTAAGGGCCGCAAATTAAGCATGGTTGCTGTTGTATTTCTAACGCGCACACACACACACACANNNNNNNNNNNNNNNNNNNNNNNNNNNNNNNNNNNNNNNNNNNNNNNNNNNNNNNNNNACTTCAAGTGCAAGAAAAGAAAATGTAGTTTGCAATCTATGATTTACTCATCAACACTTATATTTTAATAAAAGAAATTTTATTACAAAATTATCTACTGCTATGTAATGTATTATTAATTAAGAT…
G1_V2_SSR_34912	p3	(ATC)9	27	GAAAGAAAGACTGTTAGTTACGTGAGTTCTTGTTTAATCCTCTTATATATGTTTGTGACGCAAACAACTCCAACTAACACAGCTGACGGTTTGGCGGGCAACTGATCGAGTTAGTTCTTTGACATTTGAATGGTAGGTTATCCATTTTAAATTGGATCAGGGCGTCGACACCAATCAAAAATGGAATCTACGGTCACTGATCATCATCATCATCATCATCATCATCTCATCTCATGTTATATGTATATTCAAATTTCAGGCAGTTTGTGGTATAATTATTGAGAAATATCCTTTTATTTAGATGTAATATTATTAATATAATTGACAAAATTTAAAGTAAAATTATATGGGCTCCAATTTTAATTAAATTATTATATGGATAATGTAGTACTTTTTATG…
G1_V2_SSR_20225	p4	(TTAT)7	28	GTACCTACAATATAGTGTAGTGTAGTATATATAAAAGCTAGCTATCTGTGTAAATCAAACCCTCATATAATATATATATATATATATAATATAATAAGATACAATGCAACGTACATCTGTCTTGTATTTCACAAGAGTTTAATTAATTGGGTTTCTAAGTCGGTTCAACCACCATGTGATTCATGATCCCTACACTTAATTATTTATTTATTTATTTATTTATTTATTGATATATAGATGATTGTTAGAATCAAAATTTATCCAAGTACTTTGGAACATTCCAATTCAAGATACACCTGCCATGTACAGCAAATTAAATATACAAACAACTAAATTATTAGATACCGATAGAATACGGAGTAACTATCATGATTAATTATTCTTAATATACTTTTTTTT…
G1_V2_SSR_19116	c	(TTA)10ttttatcttcttagaagcataaataaaataatacctctgtctaaggtaaaattctctggaaattataaatgaatgaaattgaaatgaaatgtgaaat(A)11	138	AAAAATAAAATCAGAGAGTAATGGGATATTAGATAAAATATAGGGAGTAATGAGACATTAGTTGAAAAAATAAAAAGTAATAAACATTCTCCTTATATAATATAATTTTAATGTAAAACAGTACTTTTAACTTGCTTGAAAAGAAAAAATTCAGTAAAATAGTTTTTGTTTTCTAAAAAAATTTGTCATGTATATCTATTTATTATTATTATTATTATTATTATTATTATTTTATCTTCTTAGAAGCATAAATAAAATAATACCTCTGTCTAAGGTAAAATTCTCTGGAAATTATAAATGAATGAAATTGAAATGAAATGTGAAATAAAAAAAAAAAGTCAAAAGGAGAAACTATTGTGAATTCCCCTAAACAATCAATAATATTAGTTGTTTAGAGTA…
G1_V2_SSR_52900	p2	(TA)11	22	CCTAATTAATTTTCATAAATATATATATATATATNNNNNNNNNNNNNNNNNNNNNNNNNNNNNNNNNNNNNNNNNNNNNNNNNNNNNNNNNNATCACTTTAATCAAACACTAGCTTCTTCTTGTTTGATGTTAAACGTTTTAATATTAATTGTTTATGAATAAGATGAGTCAATCTGTGTATATGTGTGTTTGTGTGTGTATATATATATATATATATATAATACAACTTATCAAAATTTTATATTAAAATCAGTAGAATAATACTGTAAAAATAAATTGGCTGTCTCTTTCTCTTTTAAGTTAGGCCTGCTTCCATTTTTGATCCATTTCCCTTGGACGAAGCAAGCGTACAGATTAAGACACATGAAGAGGGAATCCATATGTTGCTTTATTACATT…
G1_V2_SSR_28131	c	(TAA)14ttcaaaatttccacatcaaatgatgcacgaatgatgtatgaatgcaatataattaag(AAT)11	132	AATAATAATTAATAAATAAATAAATAAATAAATAAGGAGAACTCATTGTCATTGATGGGTTCGGATGGTGGGCTCAAGTCCATAAACGTAAATTGGATTTCCATCTTGAGTTTTTCGGCTAGTCCAAGTCAACGAGTCAACCGATTTTTCAAACACAAAACTGGAACATTACTACCTACCATCCATTTTGGTTTTCATTTAATAATAATAATAATAATAATAATAATAATAATAATAATAATTCAAAATTTCCACATCAAATGATGCACGAATGATGTATGAATGCAATATAATTAAGAATAATAATAATAATAATAATAATAATAATAATAAATTGTCATATATTATTACTGCTATTAACGGGGTGTGTTGCGCGAAAGATATCAATGACTGTCACAT…
G1_V2_SSR_15877	p2	(AT)8	16	ATTTAAAGAGATTGGATTATTGCATACATCGAAACAAAAGAATAAAAGGCAAGACAAGGCAAGGCAAGGCAAGGCAAGGCAAGGGATATATGTCATTGTCATTTTCATTCTTTAAAATTGTTTTGCAAATGCCATTGTGTTTCAAACTCTTTGACGTTTTCTCCGATTCTATTTTCAAAACTATAATTTCTTCCTTTCAATATATATATATATATANNNNNNNNNNNNNNNNNNNNNNNNNNNNNNNNNNNNNNNNNNNNNNNNNNCATCACTCAGAATTTATAACAAGAAAACAATCTAATGAGATTATTCTTTTTTTTAAAGAGACAAAAGCTTAATTAGACATATTTTATAAATCTACCGATATTATCTTAGATTTCAGAATTTTATAAAAAATTC…
G1_V2_SSR_10119	p2	(TA)7	14	AGTGATAGGCGGGTACTGTCTGCATGTATTAGAAAATGATTGAAGTGTATGTAGCAAACAAAATATCATTGTTACTGGATTCTTGGGTTGATATTAAATAGTGTGAATACATATAGAGAACAAATAGTATTGGAGCACTCTCCATGTACATTGAGGCCCGTAATTGAAGTCCAATGCACGAGTGTAGGAAGATGTCAACTATATATATATATANNNNNNNNNNNNNNNNNNNNNNNNNNNNNNNNNNNNNNNNNNNNNNNNNNNNNNNNAACAGCTGAGTCGCATGCGTCAGGTCATAATATTGAAACCGTTTATATGCCTGTCTAATAGCTTCTACACTTATTGAATTTTTTTTTTTTAACTACATATAGAAGTACTAATATTACATTAGAGTTATAT…
G1_V2_SSR_64445	p2	(TA)6	12	GAGAAAATTTTAGTTGATCGAACTCTACTATCATTCAAAAACGTTACGCATTATAACAGATTCAAACCAACAATTGTTACATAAACACAGAAGTGCCTTCTAGCTTTTTTTATTTAGAGCAAAAAAATGGAACCGAGTTTCATACACACATTCATACAAAATTTGCTTTGAAAGTTGTAATGTAAAATAAAAGAATCTTTATATATATATANNNNNNNNNNNNNNNNNNNNNNNNNNNNNNNNNNNNNNNNNNNNNNNNNNNTCAAAGTCTCCCAGAAAGTTCAAGAAAAGATTCAATGACATTAATAAAATCCTCCAAGTAACGAGAGAGATCCACAAAATTTATTCAAGTCTAAACAGTATACAACAAATAATCAGAATTCCCTCCCCACCATGATG…
G1_V2_SSR_52902	p2	(AT)8	16	CCATTTTTGATCCATTTCCCTTGGACGAAGCAAGCGTACAGATTAAGACACATGAAGAGGGAATCCATATGTTGCTTTATTACATTAATTAATTATCAGTCTAGGAAACGAAATCATGTGTCCATAACCTACTGCATCAAGTACTACCACCACTACTACCACTACTACTACGGCATGTAATACATACATATACATATACATATATATATATATATTTATTGCTTGAGCTAGTTAATTATTAGCCAGCTACCTCAACATGAGTCTGATCCCTGCCTAGATAATATATATGTTTATTTTTGTAACTTAATTGTAGATTAAAAGGGAGCCCAAAAGGCTAAACAACATAAGATGGGAATCTTAAGCTAGCACTTAGATTAATTATTAATAATTAAAGTACGT…
G1_V2_SSR_55556	c	(A)11ttt*ataacaaaaatatctgtttactcgtcaaacacttttaacacatccatttaatgtacaact*ctctc(TA)9	99	GTATAAAGTATTTTCCATTATAAAAAGGTTAGAAGGAATAGGCTAGAAGACACTTCGGTGTGAATTTGAATGTTTAAAAATACTTAACTAGTTATGTTTGAAGGTAGGACATATTAGATTTTCTATTTTACTTTCAATAGAAAATTTTTTGGGTGGGTTTATTTGCACCTTAAAATTTATTTGAATACATATATTTTGCAAAAAAAAAAATTT*ATAACAAAAATATCTGTTTACTCGTCAAACACTTTTAACACATCCATTTAATGTACAACT*CTCTCTATATATATATATATATATTAAATCCTACATCCGTATAATACAAGTACAAGTTCCCAGTTGGTATTATGTTTGGCAATGTAGTATTTCAGATAAAAAAAT*AGAGACAAACTAAAAATG…
G1_V2_SSR_33403	p2	(AT)8	16	AATCCTGATTCTCATAATTTAAATATATATAATATATTTGCTATATTAAAAACTTTTTTTAAAGTATGTTATCATTTAAAATTCATAACGTTTACGTGTAAGATGCAGGTTCTTTATGTTTGATAGTTGAACGTGCTTACCTTTCAACTTCGTTTGATTTCAACTTTCTTTACAAAAATTAATTAAGATGTAACTAAAAATATATATATATATATNNNNNNNNNNNNNNNNNNNNNNNNNNNNNNNNNNNNNNNNNNNNNNNNNNNNNNNNTTTCAACATGGTTTGATTCAATTTTGTTTTATTAAATTCAATTAAGATGCATGTAACTAGAATGTACTTGCAAAAGAAACTTTGAGATTGGAGTTTTAGAGTTTGTTTGGTGGAAAAATAATAAGAGA…
G1_V2_SSR_10748	p2	(TA)9	18	TTGGCTTTCCCTTAGGTTTTGGCTTGAGGAGAGAGAAAGGGAGAGAGGGGAAGTGAGGGGTTTTTTCTAGGGATTTTGGAGATATGTGTTGTTTGAGGAAGAAAGAGAGTACGTGTATGAGAAATAATAAATCCGGAGACAGCTATATTACAGCTCAAAGCCCACCAGATTCTCTATCTTTCTTTCTTTCTCTCTCCTTTATATATATATATATATATNNNNNNNNNNNNNNNNNNNNNNNNNNNNNNNNNNNNNNNNNNNNNNNNNNNNNNNNTTATTTCATTTATAAATATTTTAATTTTTTTTCCCTCTCTGTTGAGAGGTAGACTTTATTCTTTTTCAATCCCATTCCCAATCAACACCACAAGTTGAAGTTAAGAATAATAATAATATTTCATA…
G1_V2_SSR_1057	p2	(TA)9	18	TTACTATTTTTAAACATTATTCACTTTAATGACATTTAAATTCCCAAATAATTTGTCTTCCTTCTTTTTCAATGTCTTTGAACACCTTTAAATACAATGAAAATTAAGAACTTGTTGGATGTCAATTTTAATTTCAAAAATTAATTAAAATACTATTTTATAACATTTGTAGTTTTTTTAATAATTATTTTTTGATTTTTATATATATATATATATANNNNNNNNNNNNNNNNNNNNNNNNNNNNNNNNNNNNNNNNNCATCATATTCCCTCTTGTAAAAGGAATATATCTTTTGTTCTTACATTACTAAGATTTTTTTATTTAAAAATATTTTTGGTGAGTAGGTTCTAACATAAGGTCTTGATTACAGCTCGGCAAGGATGACAGAATTTTTGTCGA…
G1_V2_SSR_1306	p2	(AT)7	14	AGCACAAGAAAATTATTATCATGAAACGAATGAACAATCAATTTAAAAACTTTTTTTTCTGACAAGTCAATTTTAAAACTTTGTCAAGGGAAAACCTTACCATTTTTACAGTGTATGAGTATTCGAACCAAACAAATAAACTTTCAGCTTCCTGTACAAAGAAGAAACAGAGGCCTTATTCATATATCAAAATGAAAAAATATATATATATATAAACCAACAATTACAACAATATACAAACGAAATGCTCACGAACCTACAAAATTCCCCGTTTGGCAGCTAAGAAAAAGAAAAGGAAAATTAAAAATAAAATGCAAATAGTTAATTGATTGGACACTGTATCAACTCCAGCAATACACCATTTTAACTTATGCAAAGAAATTTGAGAAATTTTGATTA…
G1_V2_SSR_46414	p2	(TA)7	14	GGAGGAGACTTAAATGATTGTTTTCACAGGCTTAGGTTTTGTCATTGAAGTTGTCAACCAAAGAATATTAATTTCAAAGCTACATTTACTCAAATTTTCTAGTTTCATGAAATTTCCATGACTATATATTCAGGTTTCAAGATTTTATAATATTTTATTTAAATTAAATTAAATATTAGTTGAGCATATCCATGATATGTATATATATATATATNNNNNNNNNNNNNNNNNNNNNNNNNNNNNNNNNNNNNNNNNNNNNNNNNNNNNNNNNNTATATATACATATGAATCAATGAAATAAAATATGGAAAATTATGAATTTTTTCTTTTCATAAAATAAGAGTTTGCAATAACTTAAGAAATAGCTGAAAAAATACACTGAAATGAGAACTCTCCAGCT…
G1_V2_SSR_22247	p2	(AT)9	18	GACATTGTATTTGGAGTTATGTGATAATTTTATCCGAGAATTCATATATATTAAGGAAAAAAAAAGTTAGGCAAATCAAATGGGTTTTTGACACGTGTTGGTTTGGATGGTTTAGTTGCTAACCAATTTTTGTGACATAATAGTTTTGCCTACACGCAACCTAAAAATGAAATGTCAAAATAAATAAATGAATAAATAAATATATATATATATATATANNNNNNNNNNNNNNNNNNNNNNNNNNNNNNNNNNNNNNNNNNNNTTCACATTGTTATTGGTGTGCGAATGTAGACATAGATCTTCTTCACAAGTCCAATATATTTCGTATCTTTCATTAAAGCAAAGTTTGACCCACCTTCTAAAGCTTCCAATATGAGTGGGAGATATATTCACTAAATA…
G1_V2_SSR_41244	c	(TCT)14gcttccaagaatggatagcgtagacagcaaccttcatggacaattcacttgattagattaatgttgccctcaccccaccc(CACCT)6	152	GTTACCCACTACTACTACTACTAGTGATTGATAGCCATCATAATGTTTTGAAAAATCAACTGATTAGAATTTTTGGGAGGGGACTCGATACGAAAAGAAAAGCAACTACTGCAACATCACATGTAAGCAACAGTGGTTTATCTGCTACAGTATTAATTTCTGCTACAGCCTAATCCTGTTCCCATGTCTGCTTGCTGACTCTTCTTCTTCTTCTTCTTCTTCTTCTTCTTCTTCTTCTTCTGCTTCCAAGAATGGATAGCGTAGACAGCAACCTTCATGGACAATTCACTTGATTAGATTAATGTTGCCCTCACCCCACCCCACCTCACCTCACCTCACCTCACCTCACCTGAGACGTTTACATGGTGGACACCACCTACACTAACAAATCCTATAGCT…
G1_V2_SSR_29227	p2	(AT)6	12	ATGTCTCAAAATTAAAACATTAGTTAAGGTGTAATTGTAAGATAGAATCATCATATTAATTAATTAATTAATTAATTAATAGAAGAATCTGAATTTCAGATCATGAATTGAAAAAGGCTTTTTTAACATTCACTAATTTTGTAACTGTTTATCAGAAGAGTAATAGTCTCTCATGCACACTTACAAATTAAGATAAAAAATATATATATATAAANNNNNNNNNNNNNNNNNNNNNNNNNNNNNNNNNNNNNNNNNNNNNNNNNNNNNNNNNNNNNNNNNNATAACTCTGTATTTTAGAGTTGAGGAATGAATGAGAATGGGGAATTAAGGATGGTGGTAATAGATAAAAAGAGTCAAGTCAAGATGAGTCATGGAGATTTCTGTCTTCGAAAGGTTGAT…
G1_V2_SSR_23382	p2	(CA)9	18	AATTTCTGTACAAGACTCAAAACGTAGCTTCATATAGATCTTGTTGCGTGTACATATATAATTCATATTCGAAGCTCTTTCGGTTCATCTTTTACGAAAGAGCAAGAGAGCAAAAAATAACAGCTTACGTATTGAAAGGAGGCGTCGTTCGCTGCAACAGCGAACGACAAGTGCGGCGGCCTTGCTTGCAAGTCAGCACCACACACACACACACACATATATATGCATCTTCTTTCTGCTAGAAATTTTGTAACTTGTATATATGTAAGATGATCTGTGATCGTTGCCGCAGGTGAACGAGTAAACCTGCGAGTGAGTATGATCACAAGAAGTGCTTCTGCGGCGAACATTGCAGCTGCAAACCCTGCTCATGCAGCAAGGCTGAAGCGTCCGGCACTG…
G1_V2_SSR_22039	c	(A)14caattctnnnnnnnnnnnnnnntttctcg(CTTA)6	67	AGGTGGGAAATAAGTGTAATGGAGTTTGCATTAGATTCATCTAATAAACACAGCGGAAAACTGAGAGAGTAATAGTTTGTCAGGAGGCTAGGGGCAGGAGAACGTGCACAATTTCAAAGGACACAATCACAATATTATTAGATTACATTACACACAGAGAAGAGATCTGGATCCGCTCACAACGAAATAAAAAAATTTGAAAAAAAAAAAAAACAATTCTNNNNNNNNNNNNNNNTTTCTCGCTTACTTACTTACTTACTTACTTACTGCCACCCCTACCAGTCTTTGTTTTTTCATAAATTCCAAGAAGAGAGAGAAGTCATTTAGCTAGAGCTGCTGCTGGCTTTGACTGCATGCCTGCCATTAACTTTTGCTCAGACCTCAAAATTATACAGATAA…
G1_V2_SSR_34917	p2	(AT)7	14	TTAAAATATATTTTCTTATAAATTACATTCATTCACTTAATCATAAGTATTTTATAATTTATCTTTTTTGAACTAAAATCCCTTAAATAAGTTTACCTTAAGATTTTATGTAATTTATGATTGAATCTATTCATATCTTTTATACTATAATTTAGTAAAAAATAACTTAATCTATTATGCCTCTCACACACACACGCACATATATATATATATANNNNNNNNNNNNNNNNNNNNNNNNNNNNNNNNNNNNNNNNNNNNNTTAAACTTGGACTCTGGCCCATGGTCCAATTTTTGCCGTCAAGCCACTTTAATCAAGTCAACCCAAGTTACCCGTACGTGAAAATGATTAGACTCCTAATTCAAAATTAATTCTGCATTTAACTTGCGATTTATTATTAT…
G1_V2_SSR_59008	c	(AT)6(GT)6	24	TTGATACAATATATATATATATATACACACACAAGGAAGAATCAACGACCTATAGTTTTACACATATATTTACACTCATTTGTAAACCATTTATTTATGCACTTTCAACAGATAAAATTGAATTTGACATATACATTAATTATATAGTCAGATTTAATTTCAATCGTTAAAAATATTTAAATTTAACGATCTATAAAAAATATATATATATGTGTGTGTGTGTAAAAATATAAGATAGAAGGCTACCAATCCATTCCCCACACACACATGCACACATGTACACACACAGACACACACAAACCATAACCCCAACGGACACTTACACACCACTCAATTTTTACATTTCTATCAAATATTGATAATAATAAATTAAATTAAATTAAATTAGGACTTCTTTAA…
G1_V2_SSR_26326	c	(ATT)7gatttggtatatctgaccatgacagtaagaaaactaatgacgtaagttgattgtatgagaaagcgatcattagc(AAAG)6	119	CATTTTATAAAATAATTGTTTATAATCTTGAAGTAAAACTGTAATCCAGTGCTATATACATATTCTATATTTTAATTTATAATATTAAAAAATAAATTACTAATTGTTATTTCAAATTACGTAAATAAATAAATAATGGTTGAAAACTAAATGGAATGATGTTTATCAAACTAATACAAACTTTAATTTCTTTTGAAAAATTATTATTATTATTATTATTGATTTGGTATATCTGACCATGACAGTAAGAAAACTAATGACGTAAGTTGATTGTATGAGAAAGCGATCATTAGCAAAGAAAGAAAGAAAGAAAGAAAGAANNNNNNNNNNNNNNNNNNNNNNNNNNNNNNNNNNNNNNNNNNNNNNNNNNNNNNNNNNNNNNNNNNNNNNNNNNNNNNN…
G1_V2_SSR_7613	p2	(TA)7	14	ATTATTATCACATATTTCATATATATTTTTTCTCTAATCATACAACTTTATACAATATTATATAATCTTAATAAAAAAAGGTTTTGAGTAAAATACTTATAAAATATTATGTGAAATACTTTTATAATAAAGAACCCAATTAAACATTTATCCAGAAAGTACTGTAAAAATAGACATGTACTACCATGAAATATAGATGTATATATATATATATNNNNNNNNNNNNNNNNNNNNNNNNNNNNNNNNNNNNNNNNNNNNNATCCTCATATTTGAATGGGACCATAAATTAACTTACAACATGAGTCGACCTCAATCCAGACGTACATTACTTACAATTGGTTAACCACCAGTTAAATACTTTCTGTCTTCAAACTGATTTGTCGTCTTGACAGAACATAA…
G1_V2_SSR_16388	c	(ATAC)12(AT)7	62	TAAGCATTGTCCAAACATTCCGGATATATAGGAGAAAGATTATTAATTAGCACTAACTGTGCTTAATTAATTGGACATCTTTCTATCATTGATGCTGCATGCAAATGAGGAATCAATAATGTTGCAGGATGTTTTACATCTGGCTTTCCCAATTGTTTTGAGATCCTAGTGAAAAGAATGGATACATTAGTTGAATTATATACATACATACATACATACATACATACATACATACATACATACATACATATATATATATATGTTATGGGCAAAATATAATTGAATGCATGGTAGAATATAAGCTCATAATAGTTTCAGGCAGCACCAGGTGAGGTGACAACCTCGCTACTACTTTGATATAGGCCTCTATTAATGCCTTGTGAGTGCACTATGAACACC…
G1_V2_SSR_12641	p2	(AT)8	16	TTAAACATATCATTATTAGCCTGTTTATTAATATATTAAATTGTGTCATATGCAATATGAAATTTAAAATTATGTGTGATGTCCAATGATTGTATGAAAGTAATTGTTTTCTGTTTGAACATTGTTTGTATTAGTTTAAAGTACCCCACAAGTACCCATCTCCCAATATTATATAATAAGGTTTTCGGGACCTATGGAAATATATATATATATATANNNNNNNNNNNNNNNNNNNNNNNNNNNNNNNNNNNNNNNNNNNNNNNATGATACGAGATCGCTGGGTTGAGTATGATTTTTCCCGCTTCAGAGATGGATCTCGCCAAGTATGTTATACCTTGGGTATTAGTTGGGTGCTATATAAGCTATTTGTGATGATGTATATGTTCTTGTTGTGCAAGT…
G1_V2_SSR_12393	p6	(AAAAGA)5	30	GCCAAAATTATGACAAAATACTTCTCATTTAACACAAAATCAATTTTTTAAAAAATACTTTTATTATTTTATTTTAAAAAATGTATCAAATAAAAAAATATCTAAAAAGATAATTATCAATATATTTCTTATTTTTAAAAATATTTTTTTAAAATATTTTTTTGTAAAATATTATCTAAAACTTCATTTTTGAACAAATAAAAGAAAAAGAAAAAGAAAAAGAAAAAGAANNNNNNNNNNNNNNNNNNNNNNNNNNNNNNNAGAAAGCACTTGCATTCTTGGTTTGGTTGAAAATGGGAAACAATAAAGCATGATGTAGTTGTTAGTAGTAGTGCTACCCACTCAATTAAGATTGGCGTTGAATGTAAAAGGTTAGTAAAAGTTTGTTTGAAATTATTT…
G1_V2_SSR_18866	p2	(TA)8	16	GTAACAGTAGGGGTAGACGTGTCAGCATCAGAGAAGGTTTGGAGAGCATTCCAGGCAATTGGGGACATTGCTTTTGCTTACGCGTATTCTACCGTGCTAATCGAGATTCAGGCAAGCCCAAAATCCCAAATTAACCTTTGTCTACATTTATACTAATATATGAATCGATGATCGCGTTTATTATATATCTTTTCTCATTTATATATATATATATATNNNNNNNNNNNNNNNNNNNNNNNNNNNNNNNNNNNNNNNNNNNNNNNNNNNNNNNNNNNNGTATATCATTGCTAGGGTTGATTTTGTCCGAAGGAAACAAATCAAAACATAATCATGTGATCCATGGTTGAAAGTTGAAATGTGTACCTCATTAATTGTCGATATGGCTTGCTAGTTACTACC…
G1_V2_SSR_56316	p2	(AG)12	24	ATATATATTTTATATAAATGAACAAAATGAGATATATTATGAACTATATATGTTGAAATTTAAAAAAGAAAGGAAGAAAGAAAGAGAGAAAAGACCACAATTTTTTATTGAAACTTTGGAATGTTTAATATTCCATAACTTTTTTTATTTTTTTTGTTTCATGTTATTCTATTCCTCTAGTTATAGAGAACCTACACACAGAGAGAGAGAGAGAGAGAGAGAGCAAGCTACTAGAAACCAAACCCGGCTATGGCAATTTAAATCAATTCCCTCTTTACCCTCCTCATTATTCTTTGCTTAGCAAGTATTATCAGCATTGCAGCTGCTGTTCAACCCAGTCATTTTGACACTTCTTCTTTGAATAGAAGTACTTTTCCTCCTGGCTTCACTTTTGGTACA…
G1_V2_SSR_34919	c	(AT)10gggacagatcagcagc(T)11	47	TAACTTGCGATTTATTATTATTATTATTATTGGAAAGAAATGAAGTAATAACATCTACCCATGCACCTAATAGCTTTGGCAATCATTGCATGTGCATTTAGGATGGTTCATGTGCACCAATGACCACTACCAAATACAATAATACTTCTATTACTTAGTCTTCCTCTTAATTGAAACAGCATTTACCCCCTTCTTATAAATATATATATATATATATATGGGACAGATCAGCAGCTTTTTTTTTTTACATAAAATTTTATATCAATTATAAACTATTAAATATAAATATATTTAATGGTTAAAATTACATCCGACTATATAATTAATGTATAATTAATGCATACATAATTAATGCATATGTTAGATGCAATCTCAACCGTTAAATGTGTTTATATCTAA…
G1_V2_SSR_37026	c	(ATAC)6accaacacaacaaattaaaccacgtcgcataacaca(TAAT)9	96	ATACACTTGCACATGTTACCAGAGCATCACGACGACGAAGACGAAGACGAAGACGAGGAAGAAATCAGAGGTTCGCATTGTGTTCCTTCTTCTAATGCATTCAAAACATTCTTGCTCTTTGATGGCTCTGCGTTTTTGTAGATCGCGTATAAAACTAACTGAGCTGTTCCCAGTAAAAATCCTGTCCCGTTTGGTACCTATACATACATACATACATACATACACCAACACAACAAATTAAACCACGTCGCATAACACATAATTAATTAATTAATTAATTAATTAATTAATTAATTATCAACAATATCTACTTTATGAATCAAATTTTGTACGCAGATTTATTTACCGACATGGGAAAAACGTGCTGCTAATTGTTCTTAGATTATGACAAAGATGATA…
G1_V2_SSR_8708	p2	(TA)9	18	GGCCATAATGTAGAGAATATCATAAAGTGTAGAATATAATATAAAAGGTTATATGAGTAATTTATTTGGATAAAAATGTACTTAGCATGTATCGCAAACCTATACACCAAGAATATTTGAGCATATATTAATTAAGCATATATCCTCGTCATGTCCATCAAATTTGGCACAACCACATCTATCTGTCTATCTATCTTTCTATATATATATATATATANNNNNNNNNNNNNNNNNNNNNNNNNNNNNNNNNNNNNNNATATATTCCACATCTTATCTTATCTACTGAGTACAAATGCTTTAATTTCTACAATTCCTGTATGATATTTAAAATTATTGTTGAGAGATTTCTCCCAACAAAATAATATTTTCATTTTAATATTTAACATTTCAACATTTAAA…
G1_V2_SSR_18906	p2	(TA)9	18	TACTTACTTGCAGACAAACAAATAATCTGAGTCAGTTTCCTTAATTCTTATGCATGTTTTTGGTATATACACAATATTTCAATTGTGAAGGAAATTACAATCCAAGAAATTGGTAAATCAAACTTATATATAGTCTCTGTGGATGATCTGGTGTTTGCTTGTGTCCAAAAATCTATGACTTTCTTCCAGGATGGCTTGGTATATATATATATATATANNNNNNNNNNNNNNNNNNNNNNNNNNNNNNNNNNNNNNNNNNNNNNNNNGGTCTACATGGAGTTAAGGGCGGGCACTGACTATAACAGCTCCTCATTGTCACATGCATCATCGTTCACGGGCTGAAGTTTAAGTTTGTACCTCATTTGTCTTCACAATAACCACAACGCAAATATGGCTAGA…
G1_V2_SSR_32693	c	(TTAT)5tttcaatattagttggatgaatgcaaattaaactacatattgattgatccatgaattt(A)14	92	TGGGCTTTATAGTAATTTTACAGCATGACCCATCACATTCTCCTCTCTTCGACGTTTACCGAAGGGAAAATCCGAGTGGAGCAATATACACAACATGACCCAAAGAAAAACAGCCGAAGGAGCTTATACGTTTTAGGAATATTATCAAATAAGTTCTTGTCACTATAAATAACAAAACTAAGAAGAAAAAAAAGCAGAATTATTTATTTATTTATTTATTTTCAATATTAGTTGGATGAATGCAAATTAAACTACATATTGATTGATCCATGAATTTAAAAAAAAAAAAAAGATAGAAAAAAATGCAGTGCAACACAGAAAAATCAATAATTGTTGTAATAAAAACACTCCCATTCCTCTTGGCAGTTTGCCTTTGGTCATCGATTGGCTAAACTAAAG…
G1_V2_SSR_43476	p3	(TGC)5	15	CCTGGGGCAGAAAATTCTCCTACAATGGTGACTGC*ACATGGGTTTCGCACCATAAGTGAAGTAAGAGCTTCTCTTTGGCCA*TGTCTTTCTG*CAATAGTATAGTGT**CTTTT*AAAAGTCCAG*AATATTTTACTGAGGTTAAAGCAAAGGATTGCTTAGAMTATGTCACATGCATTCTATT*GATGGCTCTGAAGTGCTGCTGCTGCTGCCGCTGCTGCCGCTGCTGCCGCTGCTATCCATATCATCACACACTTAAGAGCTAAACCTCTTGGAAAGTTAATTGAGGAGTAATATGCAGAACTAGATTAAATGCTTATATGATGGCCAACTGTGAAGTTGTGCTTATTTTCTGGCTTTGCTAGTACACACTATTATGGTGCTTGAGGCAGAAATT…
G1_V2_SSR_19832	p2	(TA)8	16	TAATTGTGGCTTTTGTGTTGTTGCTTACAGCTCGGAGATCGTCGTTGAGTTTAAAAGCAGCATTGGTGACGCTGCATGTGGTATTTGTGGGCGTTCTGTTTCTTTTCGATGCAGATTTGGTAGAAAAAACAAAGCATGAACCATGGTATGTATATGCCTTTGGAAGTGTAATATCTTGCCTTCTATATATATACACGTGTATATATATATATATANNNNNNNNNNNNNNNNNNNNNNNNNNNNNNNNNNNNNNNNNNNNGCTTTAAAGTTAATGTTTGTGAAATCTTTTACTTCTGTTAACTTCAATTCAAAGTTTTGTTGTTAATATGGAAGTGAAATTTGAGATAGTGTGATCAGTGACGCAAGTGGGGACTATTAAGAGGATAGTTCAGAGGAATG…
G1_V2_SSR_12185	p2	(AT)10	20	ATGTTAGATGCATTAATTACATATGCAATTTGAAAAGATCATTGATCTGTCTCATACATACATATATGGAAAAATATCAATAACTCTATTATTTTATATATTTCTTTATCTCATTTGTAAATATTGAATATATACACATTCAATAGTTAAGATTGAATCCGACTATTTCATTCATATATAATTAATGTACTATAAATCAATATATATATATATATATATGTATATCATATTAAATCTCAATAGTTAGATGCGTTTAGATTTAATTGTTTATAAATGATATAAAAATATATGTAAAATAATAGAACTATTTATCCATCTCATTCATATATATATATATATAATATTACTTATTTATTGATAAATATTAGATCATATATATTCTTTCAAAAATTTAGATGA…
G1_V2_SSR_23635	p2	(AT)12	24	TTACATCAAACTATAACTGTTGTCTCTTAAATATTATGTTTTTACCCATTGCTTGCTATATTATACAGCGAACTACCTTCTAAGTTGTAAATAACAATAAATCGGGGCTTTTCCCAATTTTTACGAAATTATTTTGTTTAATTTAATATTTGGAGCGCAATGCCGGCATGGTGCAGCGATTTACTGTAGCTTACCCCTAATATATATATATATATATATATATGAATAGATGTTATAAAATAATGTTACATCCCACGAGAGAATCCTCCAATGCAGCTAAACTATTTTACTAATTAATAATTCCCAAACCGAAAATTTTAAAAGTAATAATAATAATAATAATAATAATGTGTTGATAATCAATCAATCTTATGGCAGGTAGTAAGATCATAGAAAAGA…
G1_V2_SSR_4674	p2	(TA)10	20	AGCTCAATAACTCGAGTTAATTGTTGTTATTATTATTATTATTATTATTATTAGTTCTAGAAAAATTTATGAGAGAAAATCAGATAGTCTCTTATTATTGTTGTATTATAATTTTTAACTTTTTATGTTAAGTTATATTGAAAGAATACACTAAAATGTAAAAAACCATATATCCATATCCACTTAAATTAATTAATTTTATATATATATATATATATAGTTACTCTGACTACTTAATTTGGTTTTAGAAGAATTATATACAGAGGATGATCAATGAGATGACCTTTGAATTACTCTAGAATTTAACAAAGCAGCATGGACATCCATAAAAGGCTTTTTAAATGAGAATTTATTATTCCTTCAGAAAATAAATATGATTTTATTCTACTGACATTGACA…
G1_V2_SSR_4256	p2	(CT)11	22	TTATGCTCTTGCTGTTTCTTCCCGTGGCTGCGTTTGGCTTTAATTTATAAGACAGCAGCAATTTCAAAAATTGTTTTTTGCTTAACCGGTATGCTACATTTGATTTTAATTATCAACTATGGTTAAAGAGATTGATATTATTTTTTGTATAAAGATGGCTTTTTGTACTTAATATGTGAAAACTCGAGTGTCTTGTGCACTCTCTCTCTCTCTCTCTCTCTNNNNNNNNNNNNNNNNNNNNNNNNNNNNNNNNNNNNNNNNNNNTAAGCCGACACATTTTTCTAATTCTAACGTGAGCGAGATTTTGAACTTTGAATTAATTAGCATTTGCAGAAGTATATCATCTCAAGTTCTTATGATTGTACGAATTGCTTGTGGGTGCTAATTGATTTAACTAAT…
G1_V2_SSR_18531	c	(GAT)5atagtttgcgtatacatatatctatctacccctt(TTC)9	76	AGAGAACTCGGTTTGTTGTCTTTTAATTTGTTGTTATCGTCATCATCCTTAATTACAGTTTTTGCTTTTTTGGGTTTTCTGGTTTCTTCTTATGAGTAGAAATGTATAGCAAGAGAGCATATATTATAATATATTATATTATACTTTTATATTTGTATCTATCAATCTAGTTAATATTTGTTTTTAATAGTCATACATAGATGATGATGATGATATAGTTTGCGTATACATATATCTATCTACCCCTTTTCTTCTTCTTCTTCTTCTTCTTCTTCTTTTCATTATGTATAGATCTTGCTAGTGGTAATTGATACACAATTTTTTTCTTATTCTTGAATATTACAAACAAATAACCCGAATTTTCACCGAATGATTTTAGGAGTTAAATCAACTAATATC…
G1_V2_SSR_32486	p2	(GA)11	22	AGCCACTAATGCTTCATTAAGGATGTATACAGAAGTGGTAAAAAGGTATACAGGGAATTTTCCATCTTTTTGAACAAGAAAAGCAAAAGGAAGAAACACGGAAAACAGGACAAGAGGCAGATGAAAGAACACAAAACTGGAAAGCACTGGAAGTGGCAGACATGAAGCTTGTATAATGCAGTTGCAGCAAAGAATTTCCGAGAGAGAGAGAGAGAGAGAGANNNNNNNNNNNNNNNNNNNNNNNNNNNNNNNNNNNNNNNNNNNNNGGTAAATTGACAATGGTAATGGTGCTTCTGATGGTGTAACGTTAATGGTAATGGTGGAAGCTCCATCGTCAGCACATGTGGAGATGTGAGTGATATATAGACAGACAAAGTTTTGCCAGGACAAGATTTGAAT…
G1_V2_SSR_63817	c	(T)11cttaaaaaaactgttaaactattaactgagtgatttac(AAT)9	76	GTTAAGGCCTACAGTGACTCTAGCCCTATTCCCACCGAAAAAAATGTTTAAAGAATAACAACTATATTGCCTGCAAAAATTTGTCCAAATTTAGATAAAATCTTCAAAAAAAAATGTTCAAAGAATAACAATGTGAGGTAAAATTTGTATCAAATTTAAAAAAAAACTATCCCAATAAAATTATGAAAATTAAAACCTCTTTTTTTTTTTCTTAAAAAAACTGTTAAACTATTAACTGAGTGATTTACAATAATAATAATAATAATAATAATAATATATTTGTAATACCCTAAGCGAATCTCACATCGGCAAAGTATGGGAGAGATGTTGGGTATATAAGATAAAAAGCTTCAACTCCTAGTAAACGCATTTTGGGTTGAAAAGCCTGAAAACAAAATA…
G1_V2_SSR_33700	p2	(TA)8	16	ATTTTGCACAAATTTTGTTTGGTGATGTATTGAGCATTTGATGTGAAATTTGTGAACCCACATAGGATATGCTTTCGACCGTTAATTGGAGAAAAGAAAATAAAAAGAAAATAAAAAGAGAGAGAATATGAAAGAATCTCTTTCGGTTGGTAAACACTAAAGAAATTAAAAGGAGGGAAAGGAATTAAACAACTATAATTATATATATATATATATNNNNNNNNNNNNNNNNNNNNNNNNNNNNNNNNNNNNNNNNNCTCTCTCTCTATATGAAACATATTGAAAGAATTAGAAACAAAAGGGGAGGAAATTCAAAGCAAAGGGACCCAAATTGGTAGAATTTAGACAACATTTTGTCCCCATAACATGATCGATTCTAAATTAACTATACCCAATTTT…
G1_V2_SSR_59721	p2	(AT)7	14	CATGACTTTGAATTATGGCCGTAAACGCGTTTAAGCTCAAGAGAGGAGACAGAAAAACCCATCATTACTTCCGAAAACAAGCTGATTTGACGTATAATTTTCAATTAAAAGAAAATTGAAAAGTATAAAATTACGAAAATTTCATATTGATGT*ATATACTTTTAGGAACGAGGTTAACATGCAAGTTTTGAGAATAT*ATATATATATATATTTAAAATTTTTAATTATAATTAACAGTTAAATATAAGTTAGTGAGTGAACATTTATCAAACATTTTATAGTTATCATAAGTTTAGAATTAAGTTGAACTTGTGTTTAATTTTTATATTTTTGTATGTATAAATAACGTGTAATTTATTTT*AAATTAGAGTGAAAGAAGGATAAGAAAAATGATTA…
G1_V2_SSR_15548	p3	(TTA)7	21	CTTTGCATTCAAATTCTTCTAAACAACCTTAATAGCTTTGTTTATTTAGACATACGATTTTAAACGGCGTTTAATTTTTATTATACGAATAGACGATTTCAATACAGACCTTTAAAAATTAATAATTTTTTAAAAATAGTCAATAATTTTAATTATATATTTAACATTTAATGAAAAAAATAACGATGAATTTACGAGTTTATTATTATTATTATTATTATCATTATTATTATTCTAACTTGTAAAACAAATAATTTTATATAATGAGTCAAATAATTAATATTAAAATCAACTCCAGACAATTCTAAAGTTCGAAGCAATTTATTTTCATGTTCATTTCAGTGAAGCAATATAATATAATTGGATTGGATTAGATTATTAAAGAATTACATGAGACAA…
G1_V2_SSR_19625	p2	(AT)9	18	AAAGAAAATTTAATTCTGGATTTAGTTATGAATAACTTGTTTGGTAGAAATCACGTGATGTATCTGTTTGTATTAATTCAGATAATTTCCATGCATTTGGCATGGCCAATATCATTCATTTTATTATCAACTTCTATATGTATGTAGATTTGCTTTCTATATTGAGATGAAATTTTGAATAAATATAGATAGAAGCATAATATATATATATATATATANNNNNNNNNNNNNNNNNNNNNNNNNNNNNNNNNNNNNNNNNNNNNNNNNNNNNNNNNATTTCAAAACCTTGATTTATTCGTTGGCATATTCTAGCATGTACATATACCCATCAATAAAATATCCATTGCTCCCTTGTCTCCCTCAAAGATAAAAACGAAAACAGAACTTTAAAAAATGAGA…
G1_V2_SSR_62515	p2	(AC)6	12	CAAAAGCTGGTATAAGAACATTTGTGAGGGTGTCCTTCACTGTCATATCTCCGAGCTGCTCGTTCACGAGCGACCGGAAATACTTCCCATCATATTTTGGCCCCATCACTTTACCTATTAGACTTGTAAACGGACTCCAGAAATTTTTGCTGGTGCCAAAAATAAAAAAAAAGGCTCTTCAATTATTTTTAGGTTTTTAACACACACACACGTATATATGTATATAGAAAGAGAGAAAAGTATACATACATATATTATATTTAATCTTAACTGTTAAAAGTGTATAAATTCAACACTTTACAAATAACATAAATATGTGTATAAATGTAAGGTTGCTAATCTATCATATATATATATATATA
G1_V2_SSR_27047	p2	(AT)8	16	AACTGTTTAATTAATTGCATATATATATATATATGTATAATCCATGTCGTTTTAAAAAATAAATAATAAAAGTTATGTAATTTTCATAATTTAACAGAAATTAAAAATACAAAAATATTAAAAAGATAATAATACTATTATATAAATTCTATTTATACAAATTGATTTAACAATATTGTAAATTATTGTCACATGTCTCATATATATATATATATNNNNNNNNNNNNNNNNNNNNNNNNNNNNNNNGATAATATTTTTTATTTATAAATGTTACATATACAAATTGATGTGACAGATTTGTATATTTTAGTTATCTATAGAGAATCATTATGAAGGAAATACTTTTATTTATTATATCTAACCAATTCAATAATTACTGCTAAAAGTTCATGTTAAAAT…
G1_V2_SSR_62894	p2	(AT)9	18	ATGGCAATTTTATCACGGAGCCCTCCTTGAGTTCATGCAACCTTCTAATTCATGGTTAATTTTTCCTTTTTTTTTAAAGCCATCCGACTTCAATTTTTGGCGCCGTTACTTAACATACTGGTTATAGTCAAGTATTTCTCTTCACTTTTAACATAATTTTACAACTCAACAATAAAGAGACATAGTGTTACATATATACATATATATATATATATATANNNNNNNNNNNNNNNNNNNNNNNNNNNNNNNNNNNNNNNNNNNNNNNNGTAAAAGTCAAATTTTCAATATAAAATTAAACATTTATCTTAAAAAATTCGATTCGTTAACACATAAATTAAATATATGACATTAAATTTAGAAAAAAAAGTGGATGGGACAATATATTTCTTCTGGAAAGTT…
G1_V2_SSR_13362	p2	(TA)10	20	TTTTAGTTCTTAGGAACAGAAAAATTTTTTTCCTTTGTTTTTTAAAAATATAAGAGTTATATGATATAAAATACTCTTATTTTATTTTTCATAAGTTTACTTAACTTCTCTTTAATATAAACATTAAAAAAAATTATTATTAATGTAATGAAAAATTATATTGAAGAAAGCAGTTAACAAGCAAACGATAAAAAATGTGTATATATATATATATATATANNNNNNNNNNNNNNNNNNNNNNNNNNNNNNNNNNNNNNNNNNGCTAGTACAAAATCTATTTAAACAAGTTCTACTTAAGAACGTAAACTTTAAATCATTATTATTATCATTATCATTATTATTATTGTTGTTGTTGTTGTTGTTGTTATTAAGAGTAAATGTTTGATTTTGTATAATTAA…
G1_V2_SSR_8295	p2	(AC)13	26	NNNNNNCCGTTCATTCTTGCCTGCTCATCAAGTATCCATCACCTTTTCACCAGTTGATGTGTGCGTTCGTGTAACTGCGTATATATATAGCGGAATTGACAACTAATGGTGGGTGCGTTTGAATCTGATACACACATATCAAATCATAATTCTTATATACTTTTATGCTTTATATATGCTTATACATTTGTGTGTGTATACACACACACACACACACACACACACTTATATCGTCCTTATATTCTTGTGTTCTAGATATAAATTAACATTTTCATTAATATTCTTTCTCAATACAGTAAATAATAATCTGTTCGAATTAAGCATCAGTTAGTTTTTACTCAAATCTTCATTCTCATCGCAGATAAATTACATCAAGTTTATGACTTAAACAACAATTAC…
G1_V2_SSR_32109	c	(GCA)5gagatcgcagaatatactgtttacgaaacagccctacatcgaagatgtgggcccacgaaaaatgtgagccagctttaaccatgacgatcaagtaaaacg(T)11	125	ATAAACCCATCAAGCCCGGCCGGCCTCTTGTCTCCAGTCTGCCTCCTGGTAGTAACGAAATCAAAACCCTTGATTCGCTTATCAAAAGAGTTAGCACTATACGTTTTAATTGACGCACAAAACGTAAAACCTTAATAGTTTAATTTCTTTTTCCTCCAAATTTTGATTGTCTGCAGGCCGGGGTCAATTTATTAGAAATGCAGCAGCAGCAGCAGAGATCGCAGAATATACTGTTTACGAAACAGCCCTACATCGAAGATGTGGGCCCACGAAAAATGTGAGCCAGCTTTAACCATGACGATCAAGTAAAACGTTTTTTTTTTTAAGTTTCTTGTTCTTGTTTTTGATTAATTTGAATTTTGCAGTAAAAGCATTCAGTTCTCGATGATGTCGTCTTCA…
G1_V2_SSR_22127	p2	(AT)7	14	TAAATTAAATTTAAAAGATTATCTAATTTATTATATGAAATATTAATTGAAAAATTGTTCAACTCAAAATAAAATTAATTTATTAAAAAACATGAATATTTAAAAATAATAGCTTTACTTCTTACAAGATCAAAGAAATAAAACATTAATATATATTCATACATATTAAAATAAAATTCAATAAATATATTTTATACTAATATATATATATATNNNNNNNNNNNNNNNNNNNNNNNNNNNNNNNNNNTCGGATTTTAATGTACAGTTGACTGACACAAATTTTTCAACAATAATGAAGGCAATTTAGTAATAGCTCTAAAAATTAATAAATTTCTCTAATGGGAGCAACTTCGAGCGGGTGATGGATGTAGGGAGTGATAAGGTACTAAGCATTCTTCC…
G1_V2_SSR_31853	p2	(AT)8	16	GTAGAATTTATGCATTAAAATAGAATAATTTAAATGATTTTCTTCGATCTGAATGTTTTTGTCGTATATAAAGACTTGTAATAGGTTATTTTGACGTTAAATTAATGCAATTTAGCACAGAAAAATAATTGATTAAAACCATAAATTTATCTTTAATTTACGCATTTGATATATGTATACTAAAAATAACATATATGAGATATATATATATATATANNNNNNNNNNNNNNNNNNNNNNNNNNNNNNNNNNNNNNNNNNNNTCACAAATCTAATAAGCCGTGACATTTCTCAGCCTCTTCCTCGAAGCCACTCTACATTTTCTCCCTAATTACTTTTTCCAACTATAAGTATCACCTCTCACTACTACTCATATTTTTCTTCACTCACCCTCTAAATTTG…
G1_V2_SSR_9638	p2	(AT)8	16	AAACTGTATAAATTTCACAGAAAGAAAATCAAAATACCTTTAAAATCAATCTCCCTTTAGTCAAGCATAAGTTTTGCCTTAGCACTTTGGTAATAATCTAAAATTCTTTTCCCTAGCACATTTTACTCTAGTGGATGTCCACTACAATATTCACGGATATTACATGTAAATTGTAAGTTTCAAAAAATAATATATATACATATATATATATATATNNNNNNNNNNNNNNNNNNNNNNNNNNNNNNNNNNNNNNNAAGTATAAGTTTTGCTTCAGCACTTCGGTAATCAAGAATTTCTTTCTGTAACATATTGCCATGTATGTACTTTTCTACTAATGTTTTTCTAAAAGCTGAAATGTTTAAAATATATATTTAATGGAAAAGCTTACAAATTACCTTC…
G1_V2_SSR_33244	c	(GTT)7(ATT)14ggaaattttg(TAT)15	118	AATAGAGATTAGCATCAACAAATAATTTTTTTGCCTTTTCTTTGTTGAAATATAAATAAATATATAAACCATCGTCTTAATCAAAGCCAAAACACTAAGAGTATTTTTGCCCAACCAATATAGATTTAGGGAAGTATTTCTTATAAAATGATAAATTATATTTGTATTTGTAAAATTATAAAATTTTAGTGATGTAAACGTTGTTGTTGTTGTTGTTGTTATTATTATTATTATTATTATTATTATTATTATTATTATTATTGGAAATTTTGTATTATTATTATTATTATTATTATTATTATTATTATTATTATTATATTTGAATAAGGCAAATCTTCTAGTAACTTTTTCATGATTTATGTGCAAATGTATATCAAGGCAATAAGGTATGGGAATGGC…
G1_V2_SSR_30132	p2	(TA)8	16	TCAACTACTAATTAGTTAATTACAGCTCTGATCACATCATATCATATCATTAAAACTGTTCCAAATTAATTTGTATCTATTTTAGTGTTTTCAGTGGTTCATTTGCTGTAAATATTAAGATTTGAGAGTGTAGTTTCTGGCTTTTGTACATGAAAAAGATCATGCATATACAAATATATATATTTGATTTTCGAACGTTTATATATATATATATATNNNNNNNNNNNNNNNNNNNNNNNNNNNNNNNNNNNNNNNNNNNNNNTCCTTTCGGCTTAGTATTTCGTTTCTTAGGATGTAAAAAATGAAAAAGAAAAGAAAGATGATGTATAGAGTCAATTGATGAACAACATTTTAATTGGATGTTCTGGGGCAACCCTATTATTTATTGCTAATTACTTT…
G1_V2_SSR_23639	c	(AC)9agagtacatatattatcaatactatatgaa(AT)6ttatgtac(GTAT)12	116	AACATCCGGATCTTTTTTGCTCTAATTAGAGAAATTGGGGATGTATATATTTATAAACTCCCAACTCAAGGCTTTCATTTCATCAAGTAATATTGTATGCATGAGCTTGTGATACACTGTCATAATATATTAATATTAAGAGAGAAATAAAGCGAGGAGAAGAAGTGGGCATAAATATATTAAGCAAAAGAATAATTAAACACACACACACACACACAGAGTACATATATTATCAATACTATATGAAATATATATATATTTATGTACGTATGTATGTATGTATGTATGTATGTATGTATGTATGTATGTATGTATAGATTGTAGATGTAGGTAGAGCTAATTTTAAGATGGGTCCATTGGAATGTTGAGTTTGTCGTATAGCAGAGTAGGGAGACATGG…
G1_V2_SSR_2530	p2	(AT)9	18	CGCCGCTTGGTTTGTCTGTCAATCAGTTTAGTAACATCACTCAAATGAATAAGAGAATTTAAAATAATTTAGGTTATGTCCATTCTCTTTATTTTTTATAAAAATAATTAGATCTAACAGTAATCATTTTGAATGTTGATCCCTATTTATGATCAAATTAATTTATGCACTAACTTAATTTGGCAACCTGGATCCACTAATATATATATATATATATANNNNNNNNNNNNNNNNNNNNNNNNNNNNNNNNNNNNNNNNNNNNNNNNNNNGTAATATTAATCCTTGAATGTATTAATATTTAACGGTTTATAATTGATATAAAATTTTATTTAAAAAAGAGAGGCGGCTGATTCTGCCCTATATATTTAATATATTATTGCATAAAAACTTGACAAGCCT…
G1_V2_SSR_485	p3	(GAT)14	42	AAACTTTTAAAAAATAACAAATTATGTATAATTTACTCAAAATCAATATTTATTTGCTAATATATTACTAAAAGGATCGAGACTAAATTGTTAAAATTGAAAAATCATACCATAATTTATTATTTTCCAACATTAGGGATGGAAATTTTATTATCTCATTCAAGATAAGAAGGAAATAAAAAGGATTTGGATTTAGGAGGATGATGATGATGATGATGATGATGATGATGATGATGATGATGACGATGACGATGTGGATCCTTTTTTATTATTCTTTTTGTTTATTTTTTAATATTGTCACATTTTAATATATTCCATGTGTATGTGCATGTGGATTCCATATATTCTTTTTGTGACAATATTTTCTTCTTTATTTTAAAATAGAGTACTAATATTCGG…
G1_V2_SSR_35682	p2	(AT)9	18	TACAAATAATTAAATGGAAACTACTTTATGACCTCAGAATGCAATATTTGTATATACATGCAGATCTTGCATACTTGAATTGAATTACTCTAAATTTGTTAGGTACCTATATAGCGGGTATTAATTCATATCTGGAGGGTCTCATAAGAGGGAGCAACTAAATCTGCAGCAGTATTGATCGAGATTGTGTTTCGGCTACATATATATATATATATATNNNNNNNNNNNNNNNNNNNNNNNNNNNNNNNNNNNNNAGTTAATTCAGGTAACGTGACAGCTGCAAGCAAGTTCACAACTGTTTAATTTCATTGGGATGGGATTCATTACACAAATGTTAAAGTTTGGATAGTACGTATATAATAGAGAGAGAGAGATTCAGGTCAGACTTACGTACGTACT…
G1_V2_SSR_33245	p2	(TA)8	16	AATTGAAGAATTTATATGAAATTATTTCAAAATACTTTTGTTTTACAACCAAAATTGGATAAAAAAAGAATTGAACTTAAAACCGTAGAACTAAATCGAATCAAATAGAATTAGTTTAGTTTGTTTTGATTTAATTTTTAAAAAAACTAAATCGAACCTGAATTTACCCATATCTACGTATAAGTTTTCGATAGAAAGCTATATATATATATATAAATTGTTAATTTAATGTATTAATTCTAAAGTTTTGATAAGTTAACTTAGTTATAAAAACACATGATCATTAATCCCCCACTTTAGTTAAAGATACATGAACATAACATTTTTTATAATTTAATTAATTGTTGATTTAATTAGTTATGTATATACTTTTCTTCACTAAAAATACTTTCACATTGC…
G1_V2_SSR_27678	p2	(AT)8	16	CCAAAATTAGAAATCCAACCCAAAGTGACGGCAGCTAAAAAACTATTTTTAAAAACTATAATACAATTCAAAATTTTTGGATTACATTTCTAATATTTTTAATATCTAAAAATAAAATATGTTTGATATAACACTTAAAATTTAATTTTAAATATAAAGAAATATAAAATTATGTTTTATATAATATTTAAAAATAATAATATATATATATATATNNNNNNNNNNNNNNNNNNNNNNNNNNNNNNNNNNNNNNNNNNNNNNNNNNNNNNNTTTTATTAAAATGTAATGATTGATTAATGCTGTCTATCACTTCACATTATTATACTTTAATATATTAATACATACAATAATGAGTTAAATTTTTTTTAAAGATAGAACAATTATGTAATTAAATTATAA…
G1_V2_SSR_21664	p3	(TAA)7	21	ACAAGCATTACATCATAAAATAATGTGATAATAATTTAATAAGTTAGAAGAAAAAACCTTACAAATACTTAAGATAACTATTAAAATAATTAGTCCTATTGATTTTTAAAATATTCATTCAAGTCTTTATTTATTAAAAATAACAATTAAATCTATATTTAATAGCAGTTTATTAAGAAAAGATTTTTAAAACTCTTACTAATAATAATAATAATAATAANNNNNNNNNNNNNNNNNNNNNNNNNNNNNNNNNNTAATAAATATTTTATTATTAATATATCAACTATTAATAAAATATAAAATTAATATTTTAATAAAAGATAAATTTATTTATTTTATTTTATAACATATTTATAATACAATATTTATGATTATATTACAATAAAATATAAGTAAAAA…
G1_V2_SSR_59268	c	(TC)6(TA)9	30	TTTATGAAATTGAAGGGCTGGTTATTAATTTAATATACATTTGTGTGTGTGCGTGTATATATATATATGCAGCAGTAAACCTAGAGATTAGGGAGCTAGCTTTGAGCATCGATCATGGTTTAGCTATAAGTCGCCTCTCTTGCCTAATCATTTTCCGAGTAATGTAGAATACTCGTCGAATTGCACCTCTCTTTCTTTTTCTCTCTCTCTCTATATATATATATATATAAAAGAAAAGAAAAAGAAAAAGAAAATTAAAGGGTAAAGGTATAAAAAAGAAAAGCATTAATGGTGCAATCCATTTGTAGTGTGGGCTAGTGGACCTCGTCGGAAGAAAGCACGTTTTTGTCACCAAAATGCCATCACCCCCTATAGCTAAATTCAAAATTCAGTGGGGGC…
G1_V2_SSR_62729	p3	(TAA)13	39	TCTCTTACGCTCTAAACAGTGCTATTGCTTTGTTAGCTACAGTTGCTCAATTTTTTTATCTCTTTTTTTATTTTTTAGTAATTATTTTGCATTATTCAATGTAAAAGGATATTCTTAATTTTCTTCAAAATAACAAAATAATTTAAAAAGATAAAACATATATAAATTTCTATAAGATTTTATTTATTTAAATACAAAGTAATAATAATAATAATAATAATAATAATAATAATAATAATNNNNNNNNNNAAGATAAGACATACAAAATTAATTTAAAAATCTTGATTATGATATTTAACTTTCACCAGTTAATCGAAATAATACATAATATGTCAATATTGAAATAATCAATATGTGAACGCTTTTACAAAATCACATATAATAACATATATCCTTAGT…
G1_V2_SSR_62810	p2	(AT)9	18	ATGACACGATTGATTTGATTATTAGGTTGTTGACATAATTATTAAAAGTAGATCAGGTTCGGATTAATTTAAAATTAAAGAATTAATTTTTTAAAGTTAAGAATAAATTCTACATTTCACTTAGCTTATATATAATACTTTGCAATTAACAATTACTAATTTGTAAGAAATATGCTTAATCAATTAAAAGAGGATGTACATATATATATATATATATNNNNNNNNNNNNNNNNNNNNNNNNNNNNNNNNNNNNNNNNNNNNNCAATTAATTGCACCATACATAATTTCTGCACACAATAATCTACAACTAGGAAATTAGATTAAATCTTCTTCTACATTAATTAACAGGTAGCAAGCTAGCAAGAATAATTATATTAATTATATTAAGGAATTGCAGGT…
G1_V2_SSR_3378	c	(ATT)14ag(TTA)14ttggaaattttg(TAT)15	143	TTTCCTTCCCCAAAAGTGCTCTTGTTTATATAGTCAAAAATGGAAATAGGAATAAGAAAGTGATATTAATTATTTCTTGTGATGTTCAGAGACTTTGAATGCACTATGAAAATTCATAAATAATAACCTTTTTTTTAGTTTTGTCCATTTATTTAGAGTGATATGTTTGGAAATATAAGAGGAGGGAGAGAGACACAAAATTATTATTATTATTATTATTATTATTATTATTATTATTATTAGTTATTATTATTATTATTATTATTATTATTATTATTATTATTATTGGAAATTTTGTATTATTATTATTATTATTATTATTATTATTATTATTATTATTATCTTTTTTCTATTTCCGTATGTGGATAAAATAGTAGGTTTCCCTATTGGAAATATTAG…
G1_V2_SSR_48486	c	(ATA)7catgt**gaaaaatt(A)11	47	TCTGGTCCTTTCCTTTTCTCGGAAATTTTAATAATAATAATAATAATAATTATAATTATAATATCAATAATGTACCGAAATAACAGTAGATTAGTCGGCCTAATCTGAACGGTAAGATGTTTGGATAAAGAACAGAGAATATGTTCGAGTTTTACTCAATAATTATAAGGTTTTTTATTAAAAAGTATAAATAGATAATTTTTTGAATAAATATTTAGAAGATTAAATATAATAATAATAATAATAATACATGT**GAAAAATTAAAAAAAAAAATAAAAGGTAATGAAGGTGTTGATATAGAGGCATAGGTGTAAGTACTAAAAAAATTGGTGACAAATGTTGACGAAACGAAGCAAATAATTGAAAAAAATTGCGACAATCAAAATCAGCGACAACC…
G1_V2_SSR_32573	p2	(AT)11	22	AATGATATTTTTAATGAATATATTTTGTCATTAATATTTGATATTTAATATTTTTATCCTACAACAATTGTATCTCTAAAACTACTATACTTGAATACTAATTAAATGAAAACCGATGAAAAATATTATATAAATAATTAGAAATTTTTATAGATCCCTTTGAATAAAATTATGTACCAAGCGTGCTGAAGATTTTCTCATATATATATATATATATATATAAGTTCAAACATATATTTAGAAATATGTGTAAAGGGAGAGAGTCTAAATAAAGGAGTGAAAACCAGTGGCGGCATTTAACTCTTCAATGAAAATCTTATTTGTGCCAGCTCTTGTCCTTCTTCTTCTTCTTCTTCTTATTTTTCACTCATCTCCTTTGAATCAAAACACTCTTACCAA…
G1_V2_SSR_29401	p2	(AT)8	16	AACTTTTAGGCTTAAATATTTTCTAATTTTTAATTATTCTCCATTCTGAAATATTAGCTAACAATTAACGAGGCTTCAAATGGATGAAAAATTTAAAAATAACTTTTAATGTTGCCAACTCAGTAACTCTCTTTTATTTTATTTATGTCATTATTTCAAGTAAAAAATTTAAATTAATATATACTTACACTACATATGCATATATATATATATATTTATATATATATTCATGCACACACATAGACATACACACACCATTATTATACCAGTTTTAAAATGATTTGTCATAACTTAATGCCAAATTTTTATTAATTATGTACAAACTTATTTTACAACTTGATTATCTATATATATATATATATTTGAAGCGAGCCTTAAAGCAGGCTAATTAATTTAAAA…
G1_V2_SSR_45205	p2	(TA)13	26	CACACACACACACACACACACATAATGCTTGGATCTGAAGTGACCCATGCGGAAACAGGACCCGGCATATATTCCCCAAATCTCATACTTAGTGTTATAATTATGATTACTGACCTAAAAGATACTGTAAGAGACAAGAGATCCTTTGAACTAGAAGCAAAACTCGATCGAATTGAAGCAATAAATGCGTTAGCATTATTATATATATATATATATATATATATAGATCTGTCCTTCTCAATTTTATTCTTCCCAAAGTAATATATTGAACGATAATGATCCCACAAGCATTTTTTTTAACAGATTAATTAATTATATATCTCATGGGATATGATTAAATTAACAAGAAAATATAATAACAACTTCTTTAAATGGTATTATATGCAATTGGAGAAAAGT…
G1_V2_SSR_7914	p2	(AT)6	12	TTTTTGTTATATTTTTCAATAAAAAATTTAAAACTTGAATAAAATTTAAAAATTACACATTAGCATTACAACTGAGTATATCATAACACGTGTTTAGTTGATTTTGATTTTAGGGAGAAAGACCTAATAATTTCGTGAATAGTATGTAAGTTTGGTCCTAGTTCTTCATCTTTAATTTCATGTGTGTATCTATATATAAATATATATATATAGTTACGGCCGGGCTTAATTATATAGGGTAAAATATTATATTCCTTAATTAATTTTCTCGGTAATTAATATCGGTATTATAATAATATATATGCGAATATGCTTTTGTCTTTTATATATATATATGGTTATATATATATNNNNNNNNNNNNNNNNNNNNNNNNNNNNNNNNNNNNNNNNNNNNNNNNN…
G1_V2_SSR_48487	c	(ATA)7catgt**gaaaaatt(A)11	47	AATAATAATAATAATAATAATTATAATTATAATATCAATAATGTACCGAAATAACAGTAGATTAGTCGGCCTAATCTGAACGGTAAGATGTTTGGATAAAGAACAGAGAATATGTTCGAGTTTTACTCAATAATTATAAGGTTTTTTATTAAAAAGTATAAATAGATAATTTTTTGAATAAATATTTAGAAGATTAAATATAATAATAATAATAATAATACATGT**GAAAAATTAAAAAAAAAAATAAAAGGTAATGAAGGTGTTGATATAGAGGCATAGGTGTAAGTACTAAAAAAATTGGTGACAAATGTTGACGAAACGAAGCAAATAATTGAAAAAAATTGCGACAATCAAAATCAGCGACAACCGAAAAATATTGACTTTGCAACAAAAATAA…
G1_V2_SSR_54139	p2	(CT)11	22	ATGAACCAGAGAAAGAGATAGAGGGAGGAGGCAGGCAACAAGAGGAAATAAAATTAAAGAAGAAAATAAACCAAGAACTTAACAATCAAAATTATTTTTACAGACGAAAAAGTTCAGTAGGCGTGGGAAAAACCACAATGGTT*AAAAAGAAAAAGCAACACCTAATCCGTACCATAAAGCAGGCCTCGTTCGATGAGCCTCTCTCTCTCTCTCTCTCTCTTTTC*ATC*TCTGTTTGGAGAGAAAG*TTTAGATAAGACTACTTGTATGATGTTGTCGTCCATATTTCTGATGTA*TTTTCGTTTTAATAATAAGTATATAGAGCAAGGATAAAATACATTACTTCTACTTTGTATTCTTATCATGACCAAAGTCTTCACTTTTTCTTTTTTTAGTTT…
G1_V2_SSR_36860	p2	(AT)10	20	GTTTAATTGATGAGGATTTAGGGAGTATAAAACCTAACCAAAAAAAGTCTATACTAATCTGAAACAACCACATCAATTATATATCATCATCATCCATGATTTATAATTACCAATTCTTGTTGAAGTTGTTCCAACCTCTTGTCCCATTGTCATCTCTATTTTACCAATTAATATATATGGGGAGTATATATTAATTAAAATATATATATATATATATATTTCAGACATGAAAAACATTTGAAACACGAGATCTCCATGGACATAACCTTGAGAAAATAAACAAAAAGAAAAATGGAAATTAATTTTCTTAACTGTGCCGACTGTGTGAATGCAATGGCAATAACTTTAATTTGAATGCCGGCATTTATCATTCAAATAGAATAAAATAAGTGGGATTAG…
G1_V2_SSR_33249	c	(AT)9c(TA)6	31	GGAACAACATTAAAAATTCAAGCCATTGCTAGAAACAAATATGCAAGCAAAATCTTATCACACATATATATATATATGCATGTGTATCTAAAATAATATCATTTAATTTTATGTTATTAAGTACTTTACAAAATTTTATAAAATAAATATTCCACTAAATTGCTTGGACTGACAAAATATGCAAATTCAAAGGTCAAACATATATATATATATATATCTATATATATATAATTGGTTACTACTAAACCATTCATTCTTTTCCATTAGAGCCCACCATTTCTTTCAATTGTTAATTTTTTTTTGGAATTATTTTTCTACTATTCTTCTAATCATTATTTTATGTCTCACACTAAGTATTAAGTCTTGAGTTTGAGTTTGGATTTTATCAGGTCTAAATGC…
G1_V2_SSR_15008	p5	(AAAAC)5	25	TCAAAGCAAACAACAATATCCCGTGATGTATTTTTGTTGTTGCATACAATTTAAGCTTCGAGACGCCATTCAGCTTTAACTTTGGCATTTGGTTATTCTTAGCCAAAACTCACTCATCTTTAGTTTATTAATTGGCAACTAATAACTATATATACCAACAATAAAATGACATCATACCCTTTCTAATTATATCCAAAATAAAACAAAACAAAACAAAACAAAACTTGTCAACATAATTATTAATTCTATATTAATTAATTTAGTAAGTAGATGAGATGATTCTTGATGTTATTTAATTATTATTACTTAAGTGAGCTAGAATAATTTATTACCACGTAAGATGAATGGGATTACGTACCATTATTAATATAGTTTTTAATTTAAAATAGTCAACTACAT…
G1_V2_SSR_16561	p2	(AT)9	18	TGAAATTATTGTCTTATATATATATATATACATATTGATCTTCTAATATAATGTTGCTTGAAATAATTATTAACTATTAAATTAAATATAAGTAAATAACAATAAAATGTTATTATTTAAAACGCAATTCTCCTTTTATATGAACTTCTCTAATTAACTAAATTAATAAATATGTTGTTCATTAATAAATGAGAATATAATATATATATATATATATANNNNNNNNNNNNNNNNNNNNNNNNNNNNNNNNNNNNNNNNNNNNNNNNNNNATGTAGGCATGTTAAGAGATTATTTTAAAGGTTAGGTGATTCTAATTCTTAATTATTTTACTAAGGATTTTAATATTGCGTTTTTAGATTTAAATAAACATACAATTACAATATAAATAGATTCTAATTT…
G1_V2_SSR_49662	c	(AGA)5agtggaagaagagcaagaagaggaaggagaagaagag(GAA)7	73	CGCAACAGATCTCTGCTGCCTTCTCGAAGCAAAAGCATAAGCTTTAAGGTTACTTTTCTTCTACTTTCTCTGTCTCCGTCAATTCAATGGCAAGGAAGCGAAAGCACGAGCCGGTATCTAGCGAACCAACAGAACCACCACCAAAACAACAACAAACTGTAGAGGAGCCAATTGAAGAGGTGGAGGAATACGAGGAAGTAGAAGAAGAAGAAGAAGTGGAAGAAGAGCAAGAAGAGGAAGGAGAAGAAGAGGAAGAAGAAGAAGAAGAAGAAGAGGAAGAGGAGGAGGAAGAAGGTAAT*CAAAACATCGCCAACACCTTTTCTACATCAGCTGATCAAAAGGACAACGAGGACGATGAGCCGATACAGAGTCTTTTAGAGCCTTTCAGCAAGGATCAG…
G1_V2_SSR_7915	p2	(TA)6	12	TAATAATTTCGTGAATAGTATGTAAGTTTGGTCCTAGTTCTTCATCTTTAATTTCATGTGTGTATCTATATATAAATATATATATATAGTTACGGCCGGGCTTAATTATATAGGGTAAAATATTATATTCCTTAATTAATTTTCTCGGTAATTAATATCGGTATTATAATAATATATATGCGAATATGCTTTTGTCTTTTATATATATATATGGTTATATATATATNNNNNNNNNNNNNNNNNNNNNNNNNNNNNNNNNNNNNNNNNNNNNNNNNNNNNNNNNNNATAATGAACAACGGTAATTAATTAATTTCTTTTCTGTTTCAACATGAAGTCTTTTTGTAAAATACATTGAAAAACTATCATCGGTGACCACCCTTTACTTTCAAATTCTTTAAA…
G1_V2_SSR_6782	p2	(TA)10	20	TGAATTTAATTGGCTTTTTTATTTGGCTTTCAATCAATAGACTGGGGACCACACAAAAGAGGTGATGTCAGTATTCTTGCCTTTAGGGTTAATAATAAGGTTATTTACTCTTAAATCATGAAGTATCTGCGTTATCGTTAGGGCAAACAACAAGGAGGTAAGTAAGTGTTACAATGGTAAAACTCAATGGGAAATTGGTTATATATATATATATATATAAAGGATGAGCAGGAGATTTTAGTCACTACTCACTACTAATCATCCCTCCTCTTTCCTCTCTGACAATTCTCTGTTGTCCGGAAATGGAAGAAGGTAATTCATCAGTAATAACGAGTTCTCTGACAGTGAATAGTGGAGTCTCCACGGCAAGCTATAACAGCAATAATGAAGAGCTGCTGC…
G1_V2_SSR_22174	p2	(AT)10	20	TATCATATTTTGTTTATTAAAATTTAAATACCAAGTATTGACATTTTTTTCATTTGATTACTTGCATAAAAATAAATAATTAATTGAATTTTAAGTTTAATTGGGCGTAGGTAACATCATGTTGTCGGGCGGCTAGTTGGTAGTGATAGAAACTAATTGGATTACTTTGATTGTTGCAAGAAATCAAATATATATATAGATATATATATATATATATATGAAGATAAAACAATTATTTAAAAAAACAAATAATAATTTGTGGTTCAAAATTTGAGAAATTGCCAACATATTTTCGGATAAGTTGTCTTGTCTACTAGGCCATAATTGGGCCATGTGATAAATCATTACATTGAATATGAGTTGCCAAACATACCATCAATTTAATATACTTTAATTTTC…
G1_V2_SSR_13369	p2	(AT)12	24	AATTAATTAGTCCATCTCCACGTCCATTTAATTTTACTTTCAAATTCGTTAATTATTGAACGTGGCGTTGTATTTTAGTTTTTCCCCACTTCAGTAATTAGTCTTCCTTCTGAGTCATTTTCAACGTTAATTCTGATTTCTAACATTGCTATAATTGCCTTGCAATTTGATAGACAAGTCTGCGTCACCATCAGTAGACATATATATATATATATATATATATTTATACACACCTTCAATCAATCTATAACATAATATTTGCATTAGTAAAACATGAGAATGAGAAACACGTCTATCAATAACCAAGTAAAATAACAAAAAATACGAATTTTTTTGTAAAATCCTTAATGTAGCAGTTGAGAATAATTGGGAAAAAAGTTTTCTGATTGATTGTTTTAG…
G1_V2_SSR_2745	p2	(AT)10	20	TCATCATTGATTCTTCGCTTCCTTCTTTTTCTAGTCATCGACCTCTCACATCTGGTCATATATACATATATGTATACATATGCTTCAACTGCATGCCACGAATTCTGGCTTGATTGTTGGAATACAAGATGCCCCTGGTCTTGGGTCACAGACTTGCAAATATATTGCTATAAGTAACGAGGACCTCATGAAAAATGAAATATATATATATATATATATNNNNNNNNNNNNNNNNNNNNNNNNNNNNNNNNNNNNNNNNNNNNNNNNNNNNNNTTGCCATGGCCCCCTTTGCAATTTATTCCTTAATTAATTCTTACTCGAACATACGTAATTTCTTAAATTGTTTTGCTCTGATTCTTTTGCATACTATTTGATGAGGCCATAATATTTTGAATTAGA…
G1_V2_SSR_37288	p2	(TA)9	18	AGATAAATCTTCACAAAATATCAGTAATTTTTTTAAAAAAAATTCTTAAAATTACAGTATAAATTTAAAAGGGGATAGAAATTATACATTTCTTTTGAACATTAATTATTATTTACAAATTAAGATATATAAAAAAAATTCATACCATTATTATTACTCTTCAAATATTTATATTCTATTTCCACTCTGTGTTTGAGTGTATATATATATATATATANNNNNNNNNNNNNNNNNNNNNNNNNNNNNNNTTTTATTGTGTATTTTCAACAAGAATCAATATGTATAGATATAGTAATTGGTTCATTTCATTGTATGTCCTTAGCTAGATCAACAAATGAAGTACCTTTAAATTAATTAATAATGAAATTTTCTACAAAATAAATGAGCAACAGAAAGTAA…
G1_V2_SSR_56409	p2	(AT)6	12	TGATCATGATGATTGGGCATATTAAGACAAGAGAATTTATTAAATTAGTTGGTGAAAGAAATTGGTAGGAATTTAGGATCCACTAATTGATCAATTGATGAGAGTCTCACATAGGTAGATAATGCTTGGTCTCCCATTAATGCCTTCCACTGACGCAACCATCAAAATCAAATCAAATCTATTATAATAATAACCAA**ATATATATATATTATA*TATATATTATATTTATATGATAATTTATATTTTGTTGATTATTATTACCTTGTTTAACACAAGTATATATTTGTTCTAATACGAGCTTAATTAACATCATAAAAAATTTTAAGTATATATGAGCTATATATAATGAATGAATGAATGAATGAATGAATGAATRAATGAATAAATGAATWGTTG…
G1_V2_SSR_64793	p2	(TA)7	14	AAAATGAATGTATCATTCAGATTTAAAATTCAGTCAGATTCAGATTTTAGTCATATTTAGTGTTCATACTGAAATTCGCAGTTTTGATATCTCACAACAAAGATTGAAATCTTCTTATTTTCTCTTGAGGAAAGAAAATTTTTGTTACTTCTTTCAAAAAAATTTTTATTATTATTGAATGTACATGAATATAATGCGCTATATATATATATAAGTGCTAATTTTCTTATCCTAAAAGTGTTAAGAGTTTTGATAGAATGCGAAGTAAATTCTAATAGAATTCTAATATGTTTTAAATTAAAATTGCAAATTCAAATCGATTTCCCATTCTCATAAAGATCCTGATAGGTTATGATTTCTTTTAACAATATTAGCTGCATCCTTTTGAGTAGACATGAT…
G1_V2_SSR_12317	p2	(AT)7	14	TAACATACAGGTTTGATCTAATTCATTGTTAGAACTTTTTCAATAATAATGTTTTTCTTTATTTTTATTGAAATAATGAATAAAAAATATTTAGTTCTTAATAAATTGTGAAAAATATTATAATAGGGGCTAAATTATTATAATTTTTAAAACATAATGTAAAAAATATTAAAAGAGGTACTAAATTGTTATATATGAAATATATATATATATNNNNNNNNNNNNNNNNNNNNNNNNNNNNNNNNNNNNNNNNNNNNNNNATACAAATGATAATAATCTAACCAATCAACTAGCAAAATAAAAGTTAAGGGGGTATTCCTTTATTCGTCTAAACTTAATGTGACATTTATTTTTTCTCAAACATCAAAAAAATATCTGTCAATTTCCCTAAACATGAGA…
G1_V2_SSR_59981	p2	(AT)6	12	TATATTATATAATCACATTCATCTGTTAATTGGTTTCGAATAATATTGAAAGGATATAAGATAGAACTAAGTTTAATTTTATAATTAAATTTATTTTAACAATTAATATCCACTTTTACTCAATCATGATTACATTTTTTAATTAATTATTATCTACCAAATACTAATTTTAATTGCTTTATTATTTCATTTTAGATTAATATATATATATGGGGAAAGTATTAACAGTCTCATATTTTTATATTTTTTTAATTAATTATTAACTATTGGATCTAGCACCTCTAACAATTAAGATTAAATGTAATACANNNNNNNNNNNNNNNNNNNNNNNNNNNNNNNNNNNNNNNNNNNNNNNNNNNNNNNNNTATTTTACATAAGTAGGTATACTTAATTTTTTAA…
G1_V2_SSR_1026	p3	(ATA)5	15	TCTTATTTCATTTTAAAAATTTTACTTCATGTTTTATAAGATAACTTTAAAAAATGTGTCTATAAAGTAATTATATAAATTTTATAAAATGTATTCATAACAACCAAATAACTGATAATTTTTTGTTAAATACTTGTAAAAAATTTATTTCAAAAAATTTTTAATTGAAAATTTATACTAAACAATCCCTTATTTTTAGATAATAATAATAATANNNNNNNNNNNNNNNNNNNNNNNNNNNNNNNNNNNNNNNNNNCATTATTGGAAAATTAATTGAAAAAAATAAAATTACTTAATTATTTGAACGTCTATATTGATAATACAATATATATTAAAAAAATGAGCAAAATAGAATATCAAAATAGATGTCCTTAAAATGAAAAGATAAAACAGTCGGGA…
G1_V2_SSR_12487	p2	(AT)8	16	TTTGGTTGAGGGGCACCCTATTTTTTAATGTATGTCTCAAGTTCTTGGAAAATCTTACCGGGAAAAGTCCAAACTTATTGATAGGTAAGACATATTAGCTAACATATTAATCTAGCTGTTTTATGTTAATGCATTGTGATTAGAGTATAATTAGTACTAATATTCATATTGGATATTAAACAAATATCATTTTCGCTTGATATATATATATATATTCCTAAAGCAATTGTGGATTTTGTGATAAAGAGATCAAGACTCTGATATACCATTTCTAGCAACAGAAGCATCTTTTTTAATGATTACAGGCACGCTGTTTACCATTTGTTCTCATGTAGTATTGCGATGATTTCTTAAGCCAGTAATAGTAAAGTCTAATTCATAATCCAGGATTTTCTCAAC…
G1_V2_SSR_31105	p2	(AT)7	14	NNNGTGTCACCATCTTCCATTAACAACTTATTTTGGGACTCGTTAGCCCAATATTTTGACTATGGTCACGAGTCTCCTCTAATTATTGCTCCTCTTGTCACATACCATCCATTTATTTCTTCATTTATAACCCACGAGCTTCAGTCAAATCTTTGAATTTGTTTATTTATAGTAACGATTTTAATTATTTTCCATAAAAATATATATATATATNNNNNNNNNNNNNNNNNNNNNNNNNNNNNNNNNNNNNNNNNNNNNNTTTTCTAAATTTTTATTAAAAATAAATATATATCCGTAACTATGTTATCTATATATATGTATATATACACAGACATAGCTTAGATTCATTGATCTGAAATAGGGTGTTTGTTTGCTCGTGATTGCTATTATAATACGTCT…
G1_V2_SSR_3045	p2	(TA)9	18	TATTATAATTTACCTTTTTCAAATATCACGATTTTTACTAATAGAAAAACTTGACAAGTTACTTTACCCAAAAAGAAATAAGTTCAAGTTTTAATATATGAATTTAATAAGTTCAATAAAATTATTCACAACTATCTAGTAATCTTGTGATTCTCTTTTTTCTCAAATATTAGTATTATCAAATTCATTTTCTATTTGTTATATATATATATATATAGATATAATTTGATTGTTCATTATAATTATAAATTTAGGCCTAAAAACTTAAATTGTATTTTTGTGTTAAACAATGCGTAGAATTAGAATTATGATATAAAATTTATATTTTAACTAATTTAGTATTTGAGCTGTATTATTTATTAATTAGTTCTATTAAACTACTATAATAAATTATAATTA…
G1_V2_SSR_32996	p2	(AT)9	18	ATTTCATCACTCCCTAAATTTCGATTTTACTCTTTAATATTTTTAATAATTTTTATTTTATCATTCAGAAATTAATTGAATTAAAGGATAAAATCAAAAAAAAATAAAAATCAGAGGATGATGGAGTATTAAACGAAATATAAGAGGATAATAAGACATTAATTGAAAAAATAGGAATATTGGGCATTCTCTCTTTGCAATATATATATATATATATANNNNNNNNNNNNNNNNNNNNNNNNNNNNNNNNNNNNNNCATTCTAGCTAGATGTACATGTAGATGTATTTTAGACAATCTAGTAGTATTTTTGCCTTTTACTATTATCTTGATCGATCATATAATTAATGAGTTGAAATTTCTTATAAAGTTTCTAATAGTTTAATGCCTTGCGACTTTTA…
G1_V2_SSR_28063	p2	(TA)8	16	TTGAAATTTACATCAAAATTTTTTATTTAAAATTTTTTATAGAAACCGTATAAGAAGTTGAATATACTTAAATTATAACGTGTTGCACACGATTTTTCTACTCTTTACCAACTCTATTTAAATAATTATTGGTCCAAAGTTTTTAATAAAATATTGATGGTGCCCCTTGCAAATGAAAGAATATATATGTATATGTGTGTATATATATATATATATGTGTGTGTGTATAATTCTTACAATAAAAAAAATATAATATATTATTTCCCTCTTTTTTCTCATTCTTTTTGTTACACAATACATCAAATATATTATAATATTGTCGAACACTTCCAATCAACTCAAATGTTGTAGAAGTCATAATATACTAATGGCCGCAACATAATAAAAAATTAATGCTAT…
G1_V2_SSR_156	c	(CAT)7tattagtattattac(TGT)10tattac(TAT)5	87	ATAGAGATTGAATGTTAATATCTCTCCTGGCAAGATCCCATTATATAACAAATTATTTTGTAATGAGAAGTCATGTAATGTAGGGAAGAAAAACACATAATTAAACCCAATTTAAGATGATTAAGTTATTTATTGTTTTTTACATTGAAAAGAAATTGATAGTAATAATTTTCACAAAATGGAAGGGCCTTTTGGTCTACATCATCATCATCATCATCATTATTAGTATTATTACTGTTGTTGTTGTTGTTGTTGTTGTTGTTGTTATTACTATTATTATTATTATTTGTTGGTTCCATATGCACATTTCTTGCCTTCTATCAACTTTAATTTTAATTACACCGAAAGAAACTTTTTGTGGGATCTCGTATTATATTAATATTAATACTAAGATTTGTT…
G1_V2_SSR_20577	p2	(TG)11	22	AAAGGCAACAACAAACAAATATAACCAAGGGAGGAAAATCAAGCATTACTTAGCAAATCCAAAGATGCAATAAGAACCCATATAATAAATCTATTTGTCTCGCACTGATCGACTGCCTTCTACTTAATGGTTCTTTTTAATACCATATGAACATACACTAGTCAATATTCAGCAACTAGGTGATTCATATATATACATATGTGTGTGTGTGTGTGTGTGTGNNNNNNNNNNNNNNNNNNNNNNNNNNNNNNNNNNNNNNNNNNNNNNNNNNNNTTCATAATGAAAGTAAATTTTTTATTATGTTTTATAAGCCACCAAAAAATGCATAAACATCAATTAACTTCGACGATTAAGTTTTATCTCTAACACAGTATTGAAAAAAAAATGGGGCAGAATACT…
G1_V2_SSR_19130	c	(TATT)5ttgtaaagtatcaat(TA)7	49	ATCTTGGAAGAGCTACTAAAAAGACGAAGTCATTAACCAACAAAAAATCAAAATAAAAAAATAATGCAATAGATTATTTTTGGTGTATGATTGACATTAATTCATTATATATTATTATTGACCACTAATATGTTCTTGTAATATAAATTTATCTAATTTTTTTAGGAATTTTGACAGCTATTCACATAGAATCCACATCTATTTATTTATTTATTTATTTTGTAAAGTATCAATTATATATATATATACTTAGATTTAATTGTTTAAGTAATACGTTAGATAAGTAGAGAATCTAAATATTATAAACTTTAAATTTGATAAGGTAAAGTGGAAGGGCCACTCATATGGAATATATTAAAAAGGGTAAGCAATAAAGAAAAAGATTAAAAGATTAAGCAT…
G1_V2_SSR_24196	p2	(AT)8	16	ACACAATTATATACGAGTTAAATGATACAATTAAATAAAAATACGATTTAATTTATCCACATGATAAATTGAAGCTAATTGTTAATCTAATTGCGAGCTATTATTGACATGATTAATCAAAGCTACTAATATATAAATTATGTTATCAATAGAGAATTATGTAGCAAATTATATAAACAAAAATCAACAGAATCAATGAATATATATATATATATTTATATTTATGTAGGAAATATATAAATATTCAACAATCATACATCCAAATCCAATAAACTACCATAATTGTCCCACGCATAGGTCGACTACTCCTCCTCATATAATGTCCGTCCTCTGGTCCAAAATCTAAAGTAAGTCCTAACCTTAAATGTTGTATAAACATACAAGTAAATATGCCACAAT…
G1_V2_SSR_36446	p2	(AT)8	16	AATTTTCTGATATATTAATCCTTGAAAGAGACGAGTGAGACAGTAGTACATATGGTCAAATTCCTCACAATTAATTCGATTCTCATACTTAGTGAAGCATCCGTCTGGCTTTAAATGTAAGTAAAGAGAATCCATTATCTAAATTGAAAATCAAATGGCCCATTGTTTGGTCTATATATATTGACGAGTCCTTGTTGTAATATATATATATATATGAAAGAAAATGTCGAACCTTTTTATCATAGATATATAATTCAATACCCAATGTCACTGATAGTATCCTATCACATATTTTATCTTAGGGAAATTACCCTTTACCCTCTCAGATTTAAGGCAATTGCCCATTATCTTTTCAGGTTTAAAAAATATCCTATTAAATTTTACGATCAATTTAATTAA…
G1_V2_SSR_40081	c	(TTC)9(TTA)5	42	AAAGCATTTAGAAGCAAAGTAGCAGAAAAAGGAGAGGACCCCGGCGTAAGTCAGCATCAAATCAATTTCTCTCTCTTTCTCCAAATTGTTCACATTAGCAAAAACTGTCCCTTAGCATTTACGTAATTGTAA*GTCGCTGCTGCAGCCTGCAGCCTGGCTTCAGGAACTTGCTTATTGCACTGCGTACTATTTGTTAATTTCTTCTTCTTCTTCTTCTTCTTCTTCTTATTATTATTATTAGTATAGCAATTGGAG*ATGGTATTATTAATATTATATTCATGGTGGGCTCTCAATCTGAAGTCAAATTATTATCGAAGATTTACTTAAACAGAGATAGACAGATAGATAGATATCGTGATAAACGAAAGAAGACGACG*ACGACGACGACGATGATGA…
G1_V2_SSR_63074	p2	(CA)9	18	CGAGTACTAATCCTCTAATTAATTTCTTATTAATTCTGAGTTCTGACTCTGCCTTTCACTATGGCATCCATCCAGTGGTGCTCAGCACAATCAATAACATTTGATTCAAAGATCGAGCACTTAATTCCGTCTATTAATTTAACATTTTGTCAATAAAAAAGCCAAATGAAACAGTCGCAATATGTTTGTTGAAGTTAATCACACACACACACACACATATATGTATATATCTTGAGATTCATATAAAATACAAACAATACTATTTTTTAAATTTCATGATCCATCGATCTTCCAGTTCATGGAAAAATAGGATTTTTTTTCTAAATTAATTTTTAAATCTTTATTCAAATACGAGTTGTCTAATTAAGAAGTTGATGATAATTTTAAATATGTTTAAAG…
G1_V2_SSR_20408	p2	(AT)7	14	AATTATCATCTCCAGTAAAAAAAAGATAGCATTAAGGTCCAAGGGTAGAATTAAAATTTTGGAACGTGTAGCAAGATCCATATATATATGTATAGATATTCTAAAAGGTGGGCGGTTAAAACATTTCAAATCATAATGATACAATACTAGATTTTCCCCACACATTATTTTGACCCGAATTATCATTGCATAATAATTAATATATATATATATNNNNNNNNNNNNNNNNNNNNNNNNNNNNNNNNNNNNNNNNNNNNNNNNNNNNNATGGATGAGGAAAAGAAAAATAGAGATGGATGTTCAAGCTTGGCGTCTCGTCGTCGTGTTGTAGAGAAATTAAAATGACGTAAAAGAATCAAAGAGAGGTCGTGCACGATGTATATATAATACCGACAATTGT…
G1_V2_SSR_47310	p2	(AT)7	14	CCCACGTGAGGTAGCAATTCATGCACGTGCATGTCATGCGCACCACATGCACTCAATATGTCCACCCTCCCTCGACCAAACTCTCTCTAAATTGATTCATTAATTATATAAATTCATATTAATTTATTTCAACGATGAAAGTGGGAAGCAAGCATGACATATATTTTTTTTAATTTCAATATTTTAATTTGCTATTATCATATATATATATATNNNNNNNNNNNNNNNNNNNNNNNNNNNNNNNNNNNNNNNNNNNNNNNNNNNNNNAATGAATTATGAATTTAAAACAGATAATATTTACTAAATAAATTTTAAACTCGATTGTTATACGGATAATACATGTGAAAAAATAATAAAAAATAAAAGATAAGGATTAATTTGTTATGAAATTAAACAAAT…
G1_V2_SSR_58890	p2	(AT)8	16	GAGAAGAAAGTGGCTGGCAAAGGGCAACGGAAAGTTGGATGTTTTTGGAATTTTAATTATGGCTTCCAGATTGCGTTGCCTTGCATATACAATGTTAGCAGTTTGCTTCCTTGGTTCACTTTCTGTCTTGGTCGCTACGTAATTTACGGCCACAATTACTTTTGGAAAGTGTTTTTACTGTTTGCAAATGTATTTAATAATATATATATATATATTTTTTGTTTTATAAATATGGAGTACTTTTAATAGTACATTTTTATTATTATTTATTTTAGTTAAACTGAGGCGCGTCTTGTTTTTGTTTTGATTCACATGGGTTAGGTTAAACATGGATCATAAGAGTATATACTGCAGTAGCGTAAATCAGTAATTAATTTAACTGTTTCTGGATTAAAAGGG…
G1_V2_SSR_19927	p2	(TA)8	16	ATCTAATGATGAGTTCAAGTCAAGTTACTCTTTTAATCAAACCCAACAAATAATTCAATGATAGCAATCTCAAGAAATATTCTTCTTCTTCTTTCTTCTTCTTTGTTCTTGCATTTACCCCTTTAGAAATGTGTGAGAATCCAGTCCCTCTTTAATGACTTTGTTATGATTTTCGTAACTCTGGCAGTCTGCCCATACTTATATATATATATATANNNNNNNNNNNNNNNNNNNNNNNNNNNNNNNNNNNNNNNNNNTTCTATTCTTACAAGTTGATAATAATATTCCTCACAGTCAGTGTCCTGTTGGGATATTTTCAGTCAGATTATTGCTTTTTGATTTATTTTCTCATTCAATCCCATCTTTATTTTATTATATTTAAGTATAAATATATGTAAG…
G1_V2_SSR_42478	c	(TAA)5catatttgaaaagttgcat(TAA)8	58	ACTGCAACAATGATACTTATAGCCAATACAAGAAACGCAGACCATAAGAAAGATTGAGTTGCTGACATGATGATTTGTGAAAATTAAAGGTAATCAACAACACCTTTATATATGCCCCTAATATCATAAAATATTCTGAAGCTTTCGTGGGACTTCAAAGCTGAATACTGCTGTGATAATGACCAATTCTAAATAGTATTAATAATAATAATAACATATTTGAAAAGTTGCATTAATAATAATAATAATAATAATAANNNNNNNNNNNNNNNNNNNNNNNNNNNNNNNNNNNNNNCATTTGTTACTATTTATGTGAATTATTTTCAAATAAGTGATCAAATTGCAATTTAATGTTTTTGCTAAGTCATGATTGGGTTAATTCAGTCATATGGAATAAAG…
G1_V2_SSR_55360	p2	(AT)11	22	CAGTATATATATATATATATATATCTTGCAAAGCAAACCCTAAAGTTTCNGAAAATAATCGATATCTTCAGGACATGGCTGCTGCTTATTCCTTACCGTATTCTTCCAGTGTTGTAATCTTATCATCTCTCAAGCGCAGTACTGCTTACAGACCATTGCAAGTTAAAGCTCAGAGCTTCAGAGATGAAGGTAAAT*CAAATATATATATATATATATATATACATGTAC*TCTTTGTCTTCCAACTTAAAGTTTGTAATTAAATTGTTTGATGAC*TTATTGATATGTGTTTGTATTTTTGAGTAC*AGGGAGATTGAGT*AATAACAATATTGTGGATG*CAAATATG**AAGGTTTTAAAAGAGAGGATGGAGAAGGTTCAGAATAAAGAAAGACTT…
G1_V2_SSR_37203	p3	(GAA)7	21	GGTCAATAATGATCAAGAACTACTCACTGTGAGAGAATTCAAGCCCAAGAACAGAAGAATCATGGTAACAATCCCTCATAGACTTCCACATATATATAATTACAGAACCTTATTAGTTATTTATTTATACATCAATATTGATATCTGATTGGATTGTGATGATTAGGGCGGAGGAGGTCCAGATGATGACGATGATGATGAAGAAGAAGAAGAAGAAGAAGATAAAGAAGATATGAATAAATGGCCAAGATGGCTGCGTCCTCTTCTGAAAACAAGCTTCTTTGTTCAATGCAAGCTCCATGCTGATGCTCACAAAAGTGAATGCAATATGTATTGCTTGGACTGCATGAATGGCGCCCTTTGTTCTCTCTGTCTTTCATTGCACAAAGACCACAGAGC…
G1_V2_SSR_36199	p4	(ATTA)6	24	TTCACTCTAGTGCAGAAAACAAAGAACCAACACAAGCAAAGGCGAATACAAAATGCCAAAGAAACACAGATACAGATGCAATTGCAGACGCAGTAAGTAATAAAATTATTAAAATGTTCTACAAATACAAAAACAAGACCAGCAGTGAAAAACTCAAACCTTTCTCTACTTTTGCTATTCTTTTTTCTAAGAAAAGTCGATTAATTAATTAATTAATTAATTAATTTAAGGAATTAAATTTTTTAAAAAAAAAGAAAATAAGTGATTGGACTGAAGGGATGTGTAGGATTGATCAGAGAGAACAATGGGATGTCTATTGTCGATTTTGCAAAAGAAATTCGCAGTTCCAGTAAGTTGTTTGTTTGGCAGGTCACGTGCTTGGATTGCCTTGGCCTTTGT…
G1_V2_SSR_11397	p2	(AT)6	12	GAGGCTGCGCCAGTATTAAGGAGAATACCTTTTGGTAGCCATAATGCAAAAATTTGGTTCAACATATTTTACTTTTGTTATTAAATTTAAAATAAAAGGACATGCTTTTCTCTATATAAATTAATGAAAGTAACAAAAATATAGCTAAATGTTGTATATAGTTGAGTATTGTAATTTACCTTCCAATTAATATATATACATATATATATATNNNNNNNNNNNNNNNNNNNNNNNNNNNNNNNNNNNNNNNNNNNNNNNNNNNNTAGTCATCCCTACTATAATGAATGTAGCTAGGTCTATAGTGGCAAGGACGATGTCGGACAACAACTAAAATTACTTGAGGACTGATTTGTTAAAATTTCGAATTTATGCCTTCATTTGTTGTTTGGGTAACGTTTA…
G1_V2_SSR_29827	c	(CA)7(TA)6(TG)7	40	TATCTGTGCAGTGTCCAATGTCCAATTTAAGGGATTCATGACCAGCATATATATCATAGTGATAAAATTTCAGAACCAAAATGTTATTCCTCATAAATTTGAATAGCAGTGTGAAGTCCAGAAGTGGCATAATAATTATAGTTATTGCCTTTTATATTTATAGTTGAACTTTTCCTTGTTTCACGGCTTCTCTCTATGCCACACACACACACATATATATATATATGTGTGTGTGTGTGNNNNNNNNNNNNNNNNNNNNNNNNNNNNNNNNNNNNNNNNNNNNNNNNNNNNNNNATGCCTGGAATAATTGAGAGAGTTTTTAAAAGGAAGGAATCCACAGAAAGCATAAATTTTAATTTTCTTCTGCATATATATGTTTTCATTAGAGTTGGGGATTAA…
G1_V2_SSR_62441	p2	(TA)8	16	ATCATATCATAATTTTGCAATTATATTTTTCATTTAACAATGTGTTTCTTAGTCAGTAGTCACATGGGTAGCAGTATTTCATTCTCTTACATGCATATAAATCTGATCTCTAATTAATGTAGTGTAAAAGGATAAACGCAATGGAAGAGAATACAAAAGCAGCTTAAATACCAATATTAATTTTAAAATCAGTACATTTTATATATATATATATATNNNNNNNNNNNNNNNNNNNNNNNNNNNNNNNNNNNNNNNNNNNNNNNNNNNNNNNNNNNNNNNNNNAACACTTTCAATAATTAAAGATTGTATATAAGATTGTATATCATATATATGTATATTAATTAAACTCTATTATACAACTATATATATATATTTACATATATATAACAATTACTCCAT…
G1_V2_SSR_64837	p2	(GA)8	16	GTATTGGTTTGACTGACAGCACATGTTTGTTCACATGATATGCGTAGAAGCAAGCATCGACTGAGCGACACAAAGCAAGCTTAATTCAATTCATTTCATTTCAACGCTTTAATTTGCTTTGGTTGTAATATACATACATACATACATAATACATACATATATATCTATATAATAGTTGTCGGCTACGGCGCTCTGCTCCGAGAGAGAGAGAGAGACTGGTAAAGGATGCTGCACCTTCTTATAATAAGGATAAGGTGTTGTTTGTTTACACCAAAAATAATGTTTAGTTGCGTGTTGGAATGTGCACCATTCATTTATGGATGTGTATAGTTTAATTTATTTTCATTTCATCTTATAGCATTAATTTCACCTTATCAGTGTATTTTGGTTTTTTTAGAG…
G1_V2_SSR_14630	c	(AT)7(AG)8aa(AG)8	48	GCCCAAAATTGATTACAATAACTTATAAGAAAACATGGGCCTGATCAGGCCCATTTATTGTAAAAGAAGGAATAGCCCAGTCCAATAAAAAGCCTTCCACCCAGTCCATAGCTGAAGTAGACTTTAGATTGTCTTTTTCTTTTCTTGATCTCCTTTGTAATATTCATATAAAGAATTAAATTCGTAGCAAAGATGGTAGATATATATATATATAGAGAGAGAGAGAGAGAAAGAGAGAGAGAGAGAGACGTATACATAATTACACGATTAATGCATGTTGTGTAATTATTGAAATATTATAACTTTTAATACATAATGAATGTACTATCAATTTGATTTATCCACGAGAACATAAATGTTAATTATTGACGGTTGTATTTTTAAAATTAAGTAGTGTTT…
G1_V2_SSR_8051	p3	(TAA)10	30	ATACAAATTAAGCCTCGATATTCAGCAAAAATATTCTCTTATTTCTGATTCTGTGAGTTGTTTACTTCCATTATCAGCTGTTTTTGCTGCCGCTACCTGCTTTCATACACACAATATTTGCGCAGCCACATTTTTCAATATGTGGCCACGCCTTAATTTTCTTTTTCTTTTATTTTTTATTTTTCTCCCATGAGGATAGTAATAATAATAATAATAATAATAATAATAAAGAAATGACTTCGACAATTATTTGCATAATATGGTTTTACGATGTATTTGGGTACGTAGCTTCGTTTTAGAGAGTTTTATTAATAAAATTGAGAGCAGCTAGCTAGCTAGCTAGCATGCGCAACACAGAAAACATTTTTCAGCAACAAGCAACAACAACAACAACAACAA…
G1_V2_SSR_29409	p2	(AT)7	14	TTCTTCTTTCTTTCTTAATTAACACTAATCATTTCTTCATTTCGTTTTTACCCTCAACACGTTTGGATAACAGTGGAAAGACCATCCAATCCATGCACATCTAAAATCAGCTTCGTCTTCCTGTTATGGCAAGTATTTGCACCGAATTCAAAACTCTGACTTTAATTGTGGCCAGTTTTCTTAAGAAATAAACTAAAGAATATATATATATATANNNNNNNNNNNNNNNNNNNNNNNNNNNNTAGACTAGTACGAGTAATTCCGCCTAATAATTAAAGTCTTGAAAAACATTCTAAATGTGAATGTATCTAGAAATTCTAACAGCCACCGCTCTATGGTGAAACTTTTGATATTATATATATATATATGTTGCAAACAATTAGAAATCATTTTCTAGGA…
G1_V2_SSR_64798	c	(TA)11cattnnnnnnnnnnnnnnnnnnnnnnnnnnnnnnnnnnnnnnnnnnnnntacatt(A)12	89	TGGTTCACTTTCTTTGGCTGCTTGACAATATTTTGGCACTAAATTGTGATTATAATTATCTTGTCTGATAGCATTAGTCAGATTTTAATTGGACAATTTGCATTATAAAATATCTCTATACGTAATATTAAACCCTAATGCATAGCGTGTGGTGGTTCAATGAACTCATCAGCTGATCGAAGTCACTGCACAAAAATATTATATATATATATATATATATACATTNNNNNNNNNNNNNNNNNNNNNNNNNNNNNNNNNNNNNNNNNNNNNTACATTAAAAAAAAAAAATTATACAGGTGTAGACGAATCAATCCCAATTAAGCAGAGGCCAGATCAATCTCATATATATATAAATATATAATTTTGTTCAAACTGAAGATGACATATCAACAAGCTAAT…
G1_V2_SSR_15724	p2	(AT)7	14	CCGTTTACCGTAATTTGAGGAGGATTAGATTACTTCTGGTATTTATTTATTAATTAAAAAAATATTGACGGAATGATCGGAAATAGAAAAGAACCAGAGCCAGCGAGGAGAGATATAAAAGGGCCTTGATTTCATTAAAGAAGACCAGGAAGAGCGGGACGCCTAAAAAGTCAAGAGTCAGAGCAAAAACAATCCAAAAATATATATATATATNNNNNNNNNNNNNNNNNNNNNNNNNNNNNNNNNNNNNNNNNNNNNNNTCCTTTCTGTATCGGACAAGCGTCTTTTTCTCCGTCGTCGTTGTTAACTTTCTTACCTTCTCCATAACAGGTATAACGTCCTCTCTCCCTCTCTTCCTACACTCACGCGTACATACATATATCATTCATATGGATAATT…
G1_V2_SSR_52588	p2	(AT)11	22	CCAT*AAAAACCTTGATCATGATATAGTGCTGATCATATCTT*AAATTAGAT*AAAAAAAATTGACAGATTTTACTTTCGCTGAAGATAGAAATTACTTCTTGTAACCTTTAATGATGTTCAATCTGTCAATTTCCG*TTCAGACAAAAACA*TTTTGATCTTTTAGCTAACTCAATTATTGATTAAGTCTC*TTCTTAATATATATATATATATATATATTATAATATATCATAAATTAAATAGACTAAATTATTTAGTTAAATAAATTAAAAGAATATTAACTAGCTGTAGCGTGTAGATTAGCTCTTATCTCCTGTCTACTTTGTCTGATTCCAATTCATCTTAATTTAATTCGGAAGAGGATTAAAAAAAACTTTAACAATAATTGAAAAGAACG…
G1_V2_SSR_22471	p2	(AT)8	16	GGCCAGGATTTCGGTGCCGTTGCAAACAAGGGTTCGAAGGAGATGGATATGCTGCCGGCACGGGCTGCCGTAAAGGTCAGTTAGTTTTTGTCAATTACCCGAGATTTTTTTAATTTTTCATTCATTTGTTAATCAATCATACTAATCAATTTAGTTCAACATGATCAAGTAGTCAGAATTATTAGATAGTATTAAATAAATATATATATATATATTTTTTAGCGGAATAGTCTGCAATGATTCGAGTTCATTTTCTTTACGAAAACAACACATAATAAATCACTAGACTTGACCAAAAAAACTCGTTTGTTAATAAGTATCCAAAGGCACTGCCTAATGCTGCAATGATATGTAGTTGAAAATTGAACGCAATTATTTTGCTTTACCAAGCAGTAACTG…
G1_V2_SSR_5487	p4	(TTAA)8	32	GGTCATAAGATAATATTTAAGTAGTCGCGTGAACAACTCCTCTGTTACTATTGCGTGTAATCAGTGGAACTTGATATATCTTCCTAATTATTTAATTCAATAATTAATGAGTTGGCAGCCGTCATCCTCGTATGCTAAGAATTTGATTGATTAATTTGTTTGACTTCGATTACATTTGTATTTATTACAAGGGATTTTGTTAATTAATTAATTAATTAATTAATTAATTAAGCTCTCAAACTCAGAGCTGCCTGCACTGCAACGTTATTTCAATTGGTATCGCAGTTATTTTACAAATTAATTAAACTGGGTGAAAATGATTAATGTTTATATTTTAGCGATTTGATTTTGTATATTATACAAATTGTTATATTAAATAGAATGATAATTGTGATTATA…
G1_V2_SSR_22053	p2	(AT)8	16	GAAAGAGAGGTGTTTGATAAAGAAATCAGTGCTCATACGCATGTAGGGAGGAGTGTAATAAGTTGCAGTCCCGTAATTCTGAGCCGATTATCTTCGAGAAGAAGCAGATCAGAATCAAGCATAATGATAGAGGGAGAGCAGTGCCAGAGTACTTATTCACCGGGAATGCCATTGATTGATTGATTGCAACTTGCGAGGAATATATATATATATATNNNNNNNNNNNNNNNNNNNNNNNNNNNNNNNNNNNNNNNNNNNNNNNNNNNGAAAGCTTGAAGTTTGAAGGCAGTAGTACTTTGATTGCAGTGGAGGAAGTGTTATTTATAGGGTTAAACAAGCAGTGAATAATAATGATACTGACAATTTTTTGTCTTATAATATATATATATATATNNNNNN…
G1_V2_SSR_2624	p2	(AT)8	16	TTTGTTATTTACATTTAAATTCAAATAAATTTACTTAAGTCTAGGGGTTAAAATGATAATATCTTAAAAGTTAATGGGAATATTTTATTTTCTAAAATTTTAGAGGTATCTGACGCACACTAAAAAACTTTGGGAATTTTTGTTGCTTCTCTAAAAGTTAAAAGGATATATCACAGTATCCCTATTGAAAAAAGAATGAATATATATATATATATTATGATTTAGTCAAAATAACGTTTTATTTAATTAATTTAAGATATATTCACACAAATTTCATTAGTCAAAATTTTGTTAACTAGAATAGTATTTTCACTTTTTTAGTTATGAACTATATTTTCATTTTAATCTTAATCATTTTAGGAGTTAATATAGTAAATTATATTTAATTTTGTTAAACTT…
G1_V2_SSR_47732	p2	(TA)11	22	AAAATGAAAATAAATTTACCTTTTGTTTTCTAATCTAAAATCCTAACAACCAAGCAAATTTGTTGTCTCCCTAAATTCATGCTCTAAAAAAAGCCTAAAGTTTGCATGATTTTCGGTGGGTTCTAAGAATGGGTTGGCCTTTTTATTTCTTAAAAGTGTGAACATAAACAATTGACTATTATTATTCTTGTAAAGCAATTATATATATATATATATATATATTTCAAAGCGAACGTATTTGTAGCTTTAATGTTCTTTTCAACTTTAAGGCTAATCCTTGGCCGTTCACAATTTTTCAACTTTGTCCAGGATCATGCATTCCCTCTTCATGCATGATGTCATTTTACAAAAATTAGAATTTTAATTTTAAATTTTATAATTATAAAATCTTTTTAGATG…
G1_V2_SSR_58724	p2	(AT)8	16	TTAAGCTACTTTTTGGAAAAAAATCATTTGTGATAGGAAAGTAAAGGAATATAATAGAGTATAATAGAATAGAACCTTCATCATCAATCAGCAACCATTTCATTTTCTTCACTGGCATGATCATTTTTTCTGATACGTCTATAACATTGATTTTGTTTCAATCATATTTTAAAATAATAACATATGTACTTATATATAAATATATATATATATATNNNNNNNNNNNNNNNNNNNNNNNNNNNNNNNNNNNNNNNNNNNACTTTATCCAAACAACAAATAAGGACATAAAATAATAAATTAAAATATAATTTTGTTTAATTTTAATAATTTCATTTGTAATAAATAACAATGACAAATGGGTTCGATTGGCATGATATAACACAAAAAATAGTGAATTAA…
G1_V2_SSR_21965	c*	(AT)7(ATAC)6*	36	TGCTACGAACGAAGAAGAAGAAGAAGAAGTAGGAGAGGAGTTGGCACGTGCGATTCTGGGGAGATGGGATGGATCATGCTGAGGATCGATTACTCAAGACTGTCTTGGCTTCTCTTTCGTGTTTTTTCTTACGAAAATCACGACGGAAAGCCCGGGATTGTTCTTCTTTTAATTTAATTTAAATTATTTTCAATAATTCATATATATATATATACATACATACATACATACATACATATAAATACATACCCAGCTAGCTAGCTTGCTTATACTACCTTGTTATATATTATTATTGTAGGTAGTAATTGATTCATATTTTTAGTTTATGAACTTGTTAGTTTGAAGTTTCACGTTTAGATTTCTGGGAAAATCAAATTATTTGATTTAGAGGTAAAAGAA…
G1_V2_SSR_3550	p2	(TA)11	22	AATGAAAGAGGAAGAGAAAGTGATTGGTAGGAATTGAATTGAATTGAATTGAATTGAATTTCAGTTAGGAGAGTTACAGAACAAATAGAATTCTAGCACTGAAGACACTACGTAATTACATGCGCCTACTGGACACCTCTCTCATCATGACATGCATTATGTCGTGTGTCTAAAAAGCTCTGTTTCGTGTGCTTGTGTCTATATATATATATATATATATACATTAAAAATTTTAGGAAATTTTCTAATGATAATCACTTTTTAATCCTAAATTCACAAACTATTCAAAATTATATTAAAAAATAATCTTTTGTTTTTTGAGGTGATAGTTTATATGATCTGAAATTAGGGTTCATGCTTTCAAATTATTACGAATTTAAGTAATAATAAAGAGTAAAA…
G1_V2_SSR_8849	p2	(AT)12	24	CTATATATTTTAATTAATATTTCAAGAAATAATAATTGAATACGTCAATTGATCCATTAATTTTAAAGTTCTATGCATCGTCACATGCATAGGCCTCGCGAAGAGACCCTAATCCATTTTTCTTATGAAAGTTGTTGTAAAGGCACCATAATTTTTTATTAGAAAATTCTAATCGTATTAGATCACCAAAGGGCCTTTAATATATATATATATATATATATATACACATAGAAATGATTAANNNNNNNNNNGATTAAGCCTTAAAAACTTTTAATTTAATTTTCCATATTGACGGCATCTATAGCAAAGGAAAGTGCAAGATCCTCATCCTTCCAAAAATGGAGCAAATACATGTTCCTCACGTATTGATCTTGCCTTTCCCTACACAGGGCCACATCA…
G1_V2_SSR_61141	p2	(CT)13	26	TGCATTTTAGAACACTCATTTTTATATTTGTTCTCACTTTTGTCTTTCATCAACCTTCTGTTTTGTTCTATAATTTGTTAGTTTATATACTTGAATTTTCAAAGTAACAGTAAGAAAATGAACAATTATATTGGCATTGCTTGGTTGGAGATTGAACATCTAGTATGTGGATGTATCCTGCTCTGTGAATAATATTCTCCTCTCTCTCTCTCTCTCTCTCTCTCTNNNNNNNNNNNNNNNNNNNNNNNNNNNNNNNNNNNNNNNNNNNNTTGTATTTGGTGTTGCTGAAATTTCAGATGCTTTTGGGAAGATTCATGGAGGGATGCCTGTTGGCCCAAGTTCCTATCCAACAGGAGAATTGGGATCCTCAACACTTTCCCCAGTAGAATCCCAGTTGTT…
G1_V2_SSR_43905	p2	(AT)7	14	AGAGTAATGCCCCATATTGTTGCAGCAGCAGACACAAGATTTGCTTGTTGTGGGCTTAGCTGTTGGCCATTTGCTCCCTCAATCTACACCCTTGATGCCCTAAAGTCACACCAACCTAGGTTGCAGTGTTGTGTTTATTTCTTTTTTCAACAAAACCTCCATGAAGTCTTCTACTTACATTTTTCATAACTAATTAGGCATATATATATATATANNNNNNNNNNNNNNNNNNNNNNNNNNNNNNNNNNNNNNNNNNNNNNNNNNNNNNNNNNNNTTAGTGAACTGAAAAGGTACACGACCTGAGAAAGAGATGGGACTGATGGAAAAACGATGGCCATGCAAGGTAACTTTTAGAATGCATGGTCGATAATAAAAGAAAAGAACAAAACATCGAACATG…
G1_V2_SSR_51078	p2	(AT)6	12	TTCAATTAAAAATCAAACTCCACTAAATCGTGCCAGTACCCCTAAATAAAATACAAGATAGATGTAATAATTTTGATTGGAATGAATATTTACTAGTTCTCAAATCCAAAGTTAGTAAGATTAAGGTACTATTTATTTTTCTTATCTTAAATTTGAATATGACTGAAATCTAAATTTGACTAAAATTTAAATTTGATTGATATATATATATTTTTAACTATAAACATCTGAACAACAACTTAATATTTATATTGAAATGTTTAAAATAAAAAATAAATATATAATCATATTTAGATTTAAGTTAAATTCAAATTTCAATCATGGTCAGACTTCAAACAAAAAAAAATAAACACTATTTTATTATATTCAGATATTTTTAACAAGTTTTCAAATATAATT…
G1_V2_SSR_22473	p2	(AT)9	18	CTTAAAGTATTATAGCCCAAAACATGATCTTATTACAAACAAGAAAAAGAAAACAAAAAGACTTCTTGTCTACATTCAATTATTGAATTTAAAATGAAAGAATGAAATTATTGTGGAACTATATACATTTTAATAGTCTCATAATTGAGATGTTATGTTGTTAGTACTGAACACGACAAAATATTTAAAATGTGTGGTGATATATATATATATATATANNNNNNNNNNNNNNNNNNNNNNNNNNNNNNNNNNNNNNNNNNNNNNNNNAGTTTAACAAAGAAAGAAAGTTAAAAGAAAAGACTCAGTAGACCCCATAAAACGTTTGAAAAGAAGAAGAATATTAATAAAAATGGTGGATATGGAAAACTCATTCTACATTGAGTAAGAAAAGATTGGAGA…
G1_V2_SSR_42354	p2	(AT)8	16	TTGCATGAATGGAGAAATGAAGAAAACCATTGCAACAAGCATTATGCCTCATTTGGGCTTATAAAAGGTTTTGTTTTGGGCTAAAATGGGTTTGCCCTCTTATTACCAAAAAAATCCAGCCCAAATAGAAAAGTCAAAGGAGAATTGTTGGTCAAAAGTCGGCACCTTGTCAACCAAATCAACTTTTGAAAAAACCAAAATATATATATATATATACATATATATCAAGAGACCTATCACTTCACTGTATTTAGAGTATCAACAAAGGAAGATTAATGTTATTGTTATTATTATTAAAGTAGGGCTAAAGTGTACAACACAATTTTTTAAATCTTTTTTTTATTAGAACTTTTCTTTAATATTTTTTGACAATTCTTAACTTATGATTTATATTCAAAA…
G1_V2_SSR_16861	p2	(AT)7	14	GTTTGTTATCGTTCAATACTATTTGTTGTTTGTCGATAAGCTAAGGTATGAAAACAAAATTAGAAAAAATAGTCAATAACCTTTAGTTGGAGTGATTAGTATCCTTACCCTCCAAATAGAGGATGAGGATTCAATTTCTCCTAAATGTAAAGTGGAGGTCATTTTCGTTCGATTTCTCAAATTAATAACATAAAGACAAATATATATATATATNNNNNNNNNNNNNNNNNNNNNNNNNNNNNNNNNNNNNNNNNNNNNNNNNNNNNGATAATTTATAGTTAAATTTTGAAAATAACCCATAAAAATATAATATATCAAACAAATAAGTTTTAAATAATTTGAGAATAAACTGACATCAAATGGAAATTAGATATAAAGTTCAATACAGATAGTGATAAA…
G1_V2_SSR_8891	p2	(TA)8	16	TGCAATTTTTTTTAATCGTTTCTGCAATTATGTAATTAATTTTCTAATATTAACCAGTAAAATAATAATCAATTCCACGTATTAACCAAGGCTTGACAAAATACTATATACCACTTTTGCGTTACTTCCTTCGCAAGCAACAAGATGATGCTTAATCAATAAAATTATAATAAAATAAATGCGTATTAATTTTATTGGTTATATATATATATATANNNNNNNNNNNNNNNNNNNNNNNNNNNNNNNNNNNNNNNNNNNNNNNNNNNNNNATGTGTAATATAATAATTATCCTTCATTACTCATAATTGAGTAATGTTAGACTTTTCAAGATTATGTATTTTAAATAGTGTAATACTTATGCGTGATTTATAATATATGTTTATAATTTTTAAATTATTT…
G1_V2_SSR_20455	p3	(TTA)9	27	CACACTCTCATGTTAACCGTCGGTTTATCCGTTTTTCACGGGTTTGTTTAAATCTTTCAAATTCAAAATTTGCTGGATCTGAGGCTTTGAAGTGATGTTGTATCCGCCCATTTGTTTGGTTGCCAAAAAAGTGAAACACTCTTGAATGGATCTTTAAATCAATATGTTTTAACATTTGGATTTTATTAGCAATAATGTTTTATTATTATTATTATTATTATTATTATTNNNNNNNNNNNNNNNNNNNNNNNNNNNNNNNNNTTTTTTAGAAAACAGAACTGAAAAAAAATAAATTATCACGTTGTTTTATCAAAATAAAACTAAGCATTATTGATTTTTCGCTATCCATTTTGGCTTTCAAGCCAAGCAAAGATATTTTAAATCAGTAGCAATCCGGTG…
G1_V2_SSR_12157	p2	(TA)8	16	ATCACGACCGTAAGATCAACTATTTGATGTGAGCTGTAAATTAATTTTCACATAATTTCATATTCTGGCTACATAAATTTAAAATTACACGTTGAATAATAAATTTTTGTCTTTTATATATAAAATAGAGTTAAATAGTTGTAATTTGTACACAACTATTTCACTTTTTTGATTAAAAATATTAATATAATTCTTCTATTATATATATATATATANNNNNNNNNNNNNNNNNNNNNNNNNNNNNNNNNNNNNNNNNNNNNNNTACACACTAAAATAACTTTCAAAATTTAAGTGATCAGGAAGTTTACTTGTATGGTGAATACTAAATTAAATAGTTAACACACATAAAATAATTAATTAATTACTCGGCTCTAAAAACTTCCGTAAATATTCATCAGC…
G1_V2_SSR_7299	c	(TA)6ggtgtaagatcaatgacctc(T)11	43	AACAAATGCTGAACTAGAGAGTTTTAGATATGACAATCTCTATAAGTTCGAGATTTCGGAAGGAATTTCAGAGGAATTGAAGCCATTGTTGGCAAGATTAAGCCACTCAAGATGGACAAGCTGAAAAAGGGTGCTGCTAGAGTTTATAAAGCCAAGAGGCAGTTGTTGGAGAGATCAAGCACGATCCGGCCCTGAAATTTATATATATATAGGTGTAAGATCAATGACCTCTTTTTTTTTTTACATAATTTTTTTTATCAAATATAAACAGTTAGGTTTAACCATATTCAACGGTTGAGATTATATCTAATTATATAATTAATGTGTAATTAATTTATTTATAATTAATGCATATATCAGATACAATTCAACCATTACATGTGTTTAGATTTAACGACT…
G1_V2_SSR_54063	c	(AT)10gtatgta(TG)6	39	AAGTAGCCCTTGTTATGATTGAAAGGACCGTGTTATAAAC*AAGTCAATTACCACATTTTTCTTAGCACGACTAATTGAGAATGATGTGATAAAGTGATTATTAGTGTGTTAGGCTCTTAATATTTACTCTCTTTACCTAATTATAGATTTTCTTTTTTCATTTTTTATTCTCCCAAATTGACAACTTAAAAGCTATAAATATATATATATATATATATGTATGTATGTGTGTGTGTGAGATATGAGAGCTTAATGTATATAATAAAAAATCAATAACCTTTTCACTTTACATGGTGTTTATATTATTTGTAAACCATTAAATTTAAAAATTTTTAATGACTAAGATTGCATCTTACATGTATATTAATTACATATTTTAAATTTAATTTTAATTGTTA…
G1_V2_SSR_24493	c	(T)13cattcatttcaacgtaaataagaagtttccattttgtgaggttagagaaatagactgtagaagctgagtcacattgctttactggtaaccaataa(GTTT)7	136	ACTTTTGCTGCTGTCATGTTGCCTGAAACAAAGGGTATCCCGATTGATGAAATGATCGACAGAGCTTGGAAGAAGCACTGGTTCTGGAAGACCTACTTCAAAAATGATGATAATGGTTGCACCAGGTGCCAAGAAATGGGTTTGGGTGCCAAAACAGAGGAGAAGCTAGCCGAATAAATTGCTGTTTTCTTTTCTTTTCTTTTTTTTTTTTTCATTCATTTCAACGTAAATAAGAAGTTTCCATTTTGTGAGGTTAGAGAAATAGACTGTAGAAGCTGAGTCACATTGCTTTACTGGTAACCAATAAGTTTGTTTGTTTGTTTGTTTGTTTGTTTGTTCTTTTAACATTGCTAGTTACTAAAAATTGTTTTTCCATGTACATTTCAAATTTCTTTCTTT…
G1_V2_SSR_31573	p3	(TAA)12	36	CCCAAGCCCAACACTCGGAAACAGAGGTACAGTTTGTTTCTGCTTTTGGTAAAACTTATATTTCTAAGATTGCCTCAACACAAAGCTAAGTCTTAGAAAATACGAAATCTATGTTTGTGTCCAAACTCAAAACTTTGCTTCTTGCCCAAGTACTTGTAACTGTTTCAGCTTCGAAGTAAACAAAAACGTTAAAATAAATTAATAATAATAATAATAATAATAATAATAATAATAATNNNNNNNNNNNNNNNNNNNNNNNNNNNNNNTTTTCTTTTAATTTTTACAATAGAGGATAAGAATATTTTTAGAAACATTTGAGGATGAGAATAAGACGAGCTTATCTGATTGGGCAACTCGTCTAATTTTGGATAGAGTCAAGTGATATTGTAAATTTTTTTT…
G1_V2_SSR_5820	p2	(AT)6	12	TCATAGTGTGACAAGTAAAAAAAAAAAAAATTTGTTATCCATTTAGTACTAATCTTCAAAATATAATTGAAATTAAATTTTACTTAAAATGTGTGTAGATTTCTACAAACAATACTAAATTAAATCTGATTAACATTATCGACTCTTAGTTGATATAAATTTTCGATATAACATCGGTAGATTATATTCATAATTTATAATATATATATATTTATTTATTTATTGTAAATGACGATGGCCCTCTTTACTTGGGCCAACCTATGTGTAAAAATTTGGAAAATTAGGAAAACAACATTTAAACCAAAATGATTGTCATTACTTGAACTAAAACATCCAAAATGAAACCCATCATGAATTGAACCAAAAAACAAATATTCTATCAACAACCCGCAGTTGTAG…
G1_V2_SSR_37837	c	(TTA)5(TCA)10	45	NNNNNNNNNNNTGTTTTAAAGAATTTTAAGTGATCGGAGTAGAAAGAGAAGATTTTTGTCATTAAATAAAATACATAGACAACAAAATATATTTAACATACTTCAATGGAAAAGGTTTAATTTTTCAAAAATAAATTTTTACCATTTACTGACAATACACCATACTTGAGGGGGAAAAGTGTGATTTTCTATTATAATTTTATTATTATTATTATCATCATCATCATCATCATCATCATCATCATTGTCTTTTATCACTACAAACATAGGCAAATCCCTTAATTAATTAATCTGATGGGAGAGACTATGTTATTTGGATAGAATATTATATATACTTAAGGGACATTACAACAAAAACCATTTTTAGCGACAACAACAAGTAGTCGCCAAAAGTAGAAA…
G1_V2_SSR_33592	p2	(TA)9	18	ATGGTATTTGAATTTTGATGGATCAAATAAAAAAATCGATTTTTGACGCCTAATGTAGACCACTAAATGTCATGGACGCTATATATTCTAATGTGTATTATTGTGATTTTAACAACTCAAGATTGCATTTTAGTAGGCTAGTGCCGTGGGATAATTATGATATATCAAATAAAGTGACATGATTGGGAAAGATTCCGGCTATATATATATATATATATNNNNNNNNNNNNNNNNNNNNNNNNNNNNNNNNNNNNNNNNNNNNNNAGTATTAAAAGTTATCAAGTACCTTAGAAATATATCCAGATGGGTATATATACAAAGTTAAACACTCACGTGGATGGAGCTATTAGTTTTTTGTGGAATCAGTAAGTAACAATCTGTTTTTAAGCTTTTAATTAA…
