# Supplementary material for: Comprehensive analyses of genomes, transcriptomes and metabolites of neem tree
Source: PeerJ. 2015 Aug 6;3:e1066. doi: 10.7717/peerj.1066 (PMC4540028; doi:10.7717/peerj.1066)
Supplement: Table S20 [file peerj-03-1066-s020.xls]

## Sheet: Sheet1
Supplementary Table 20 : Neem secondary metabolites biosynthesis genes
Gene ID	EC Number	Description	Mature leaf	Flower and bud	Developing endosperm	Fruit coat and pulp	Mature fruit	Seedling root	Seedling shoot	BLAST							GO							KEGG
MEP Pathway										query_length	accession_number	length	description	E value	bit score	identical	GOSLIM	GOTERM	Functional category	Description	uniprot id best hit	Bitscore	E-value	KEGG ID	Description	uniprot id best hit	bitscore	E-value
Ai02g8193	EC:2.2.1.7	1-deoxy-D-xylulose-5-phosphate synthase	204.55	40.9784	93.0505	32.7333	0.469185	26.9055	160.16	2172	EOY06358	722	Deoxyxylulose-5-phosphate synthase isoform 1 [Theobroma cacao]	-	1323	0.911	GO:0019216	GO:0050789	P	"regulation of lipid metabolic process"	Q38854	1201	0	K00615	"Carbon fixation in photosynthetic organisms"	Q2NL26	93.6	2e-19
Ai02g16254	EC:1.1.1.267	1-deoxy-D-xylulose-5-phosphate reductoisomerase	127.237	78.1843	39.1505	54.363	44.2261	30.2804	110.396	1635	XP_002511399	467	1-deoxy-D-xylulose 5-phosphate reductoisomerase, chloroplast precursor, putative [Ricinus communis] gb|EEF52001.1| 1-deoxy-D-xylulose 5-phosphate reductoisomerase, chloroplast precursor, putative [Ricinus communis]	-	754	0.848	GO:0019760	GO:0008152	P	"glucosinolate metabolic process"	Q9XFS9	723	0	K00099	"Terpenoid backbone biosynthesis"	Q9XFS9	723	0
Ai02g14904	EC:2.7.7.60	2-C-methyl-D-erythritol 4-phosphate cytidylyltransferase	72.7996	56.8097	40.0768	42.8532	8.3629	54.3938	92.8782	888	EOY26414	308	Nucleotide-diphospho-sugar transferases superfamily protein isoform 1 [Theobroma cacao]	1e-143	413	0.813	GO:0019216	GO:0050789	P	"regulation of lipid metabolic process"	P69834	365	1e-126	K00991	"Terpenoid backbone biosynthesis"	P69834	365	1e-127
Ai02g1463	EC:2.7.1.148	4-diphosphocytidyl-2-C-methyl-D-erythritol kinase	36.4009	56.5748	44.0409	37.6125	63.2681	28.0282	62.0692	1323	EEE88188	392	hypothetical protein POPTR_0009s02690g [Populus trichocarpa]	1e-177	509	0.604	GO:0008299	GO:0008152	P	"isoprenoid biosynthetic process"	P93841	482	1e-168	K00919	"Terpenoid backbone biosynthesis"	O81014	465	1e-163
Ai02g1604	EC:4.6.1.12	2-C-methyl-D-erythritol 2,4-cyclodiphosphate synthase	404.467	223.765	107.284	114.814	47.9078	91.3115	289.214	627	BAF73931	237	2-C-methyl-D-erythritol 2,4-cyclodiphosphate synthase [Citrus jambhiri]	1e-106	311	0.747	GO:0008299	GO:0008152	P	"isoprenoid biosynthetic process"	Q9CAK8	303	1e-104	K01770	"Terpenoid backbone biosynthesis"	Q9CAK8	303	1e-105
Ai02g10041	EC:1.17.7.1	(E)-4-hydroxy-3-methylbut-2-enyl-diphosphate synthase	303.359	238.56	90.9411	154.737	91.6986	63.9523	206.845	2223	EOY34342	740	4-hydroxy-3-methylbut-2-enyl diphosphate synthase isoform 1 [Theobroma cacao] gb|EOY34343.1| 4-hydroxy-3-methylbut-2-enyl diphosphate synthase isoform 1 [Theobroma cacao]	-	1274	0.866	GO:0005506	GO:0005488	F	"iron ion binding"	F4K0E8	1229	0	K03526	"Terpenoid backbone biosynthesis"	Q6K8J4	1179	0
Ai02g19084	EC:1.17.1.2	4-hydroxy-3-methylbut-2-enyl diphosphate reductase	957.136	421.805	88.9733	188.833	287.737	77.6335	298.933	903	EOX98548	462	4-hydroxy-3-methylbut-2-enyl diphosphate reductase isoform 1 [Theobroma cacao]	1e-170	488	0.805	GO:0016114	GO:0008152	P	"terpenoid biosynthetic process"	Q94B35	457	1e-160	K03527	"Terpenoid backbone biosynthesis"	Q94B35	457	1e-161
MVA pathway
Ai02g25533	EC:2.3.1.9	acetyl-CoA C-acetyltransferase	71.9789	130.87	279.121	152.94	164.866	76.5857	90.9359	1397	BAF98276	404	acetyl-CoA C-acetyltransferase [Hevea brasiliensis]	1e-174	502	0.793	GO:0005737	GO:0005622	C	"cytoplasm"	Q8S4Y1	471	1e-164	K00626	"Propanoate metabolism"	Q8S4Y1	471	1e-165
Ai02g25009	EC:2.3.3.10	hydroxymethylglutaryl-CoA synthase	73.1083	201.392	834.23	226.538	23.3644	111.313	188.442	1398	EOY24602	465	Hydroxymethylglutaryl-CoA synthase / HMG-CoA synthase / 3-hydroxy-3-methylglutaryl coenzyme A synthase [Theobroma cacao]	-	811	0.865	GO:0008152	GO:0008152	P	"metabolic process"	P54873	749	0	K01641	"Synthesis and degradation of ketone bodies"	P54873	749	0
Ai02g16419	EC:1.1.1.34	hydroxymethylglutaryl-CoA reductase (NADPH)	67.4604	171.746	399.085	134.828	19.8631	65.3972	62.5875	1272	AET72045	568	3-hydroxy-3-methylglutaryl coenzyme A reductase 2 [Dimocarpus longan]	-	635	0.911	GO:0005739	GO:0005622	C	"mitochondrion"	O64967	628	0	K00021	"Terpenoid backbone biosynthesis"	P43256	547	0
Ai02g16520	EC:2.7.1.36	mevalonate kinase	67.2224	69.8547	532.964	75.1053	2.13916	30.6676	90.2911	996	AAL18925	386	mevalonate kinase [Hevea brasiliensis] dbj|BAF98283.1| mevalonate kinase [Hevea brasiliensis]	-	545	0.816	GO:0016773	alcohol group as acceptor"	F	"phosphotransferase activity	GO:0016740	P46086	417	K00869	"Terpenoid backbone biosynthesis"	P46086	417	1e-146
Ai02g16242	EC:2.7.4.2	phosphomevalonate kinase	12.0436	28.0153	58.0495	38.7938	26.6859	24.5777	14.1385	1473	EOY25236	507	GHMP kinase family protein [Theobroma cacao]	-	625	0.634	GO:0005737	GO:0005622	C	"cytoplasm"	Q9UT88	92.4	6e-19	-	-	-	-	-
Ai02g21720	EC:4.1.1.33	diphosphomevalonate decarboxylase	59.6991	122.517	407.171	128.959	11.7096	74.5297	61.8398	1269	BAF98285	415	diphosphomevelonate decarboxylase [Hevea brasiliensis]	-	644	0.77	GO:0005524	GO:0005488	F	"ATP binding"	Q5U403	333	1e-110	K01597	"Terpenoid backbone biosynthesis"	Q5U403	333	1e-111
Ai02g804	EC:5.3.3.2	isopentenyl-diphosphate delta-isomerase	209.245	274.836	218.468	201.315	53.2186	163.927	318.927	903	ACV74320	319	isopentenyl diphosphate isomerase [Bupleurum chinense]	1e-159	454	0.876	GO:0008299	GO:0008152	P	"isoprenoid biosynthetic process"	O48964	441	1e-157	K01823	"Terpenoid backbone biosynthesis"	Q42553	429	1e-152
IPP to Squaline
Ai02g31423	EC:2.5.1.1	geranyl diphosphate synthase	59.1162	89.6956	31.5083	93.9046	67.3981	66.6316	106.31	831	AFJ52722	328	geranyl diphosphate synthase [Mangifera indica]	1e-106	232	0.757	GO:0033384	GO:0008152	P	"geranyl diphosphate biosynthetic process"	Q94ID7	224	1e-101	K13789	"Terpenoid backbone biosynthesis"	Q9ZU77	210	5e-94
Ai02g10209	EC:2.5.1.10	farnesyl diphosphate synthase	53.7847	171.242	214.233	88.7433	4.63366	114.583	94.0082	1371	AFJ52720	342	farnesyl pyrophosphate synthase [Mangifera indica] gb|AFJ53077.1| farnesyl pyrophosphate synthase [Mangifera indica]	-	595	0.827	GO:0005737	GO:0005622	C	"cytoplasm"	P49351	567	0	K00787	"Terpenoid backbone biosynthesis"	Q43315	566	0
Ai02g1634	EC:2.5.1.21	Squalenesynthase	127.535	87.8557	572.679	199.26	277.671	207.735	175.989	1242	AFJ15526	392	squalene synthase [Azadirachta indica]	-	757	0.949	GO:0016020	GO:0016020	C	"membrane"	P53800	680	0	K00801	"Steroid biosynthesis"	P53799	654	0
